# Supplementary material for: Impact of Metacognition on Health-Related Behavior: A Mediation Model Study
Source: Hindawi journal article supplement (doi:10.1155/2023/6547804), 2023-01-31
Supplement: f1 [file 6547804.f1.pdf]

| serial | nu | Gender | Grede | Age | A1 | A2 | A3 | A4 | A5 |
|--------|----|--------|-------|-----|----|----|----|----|----|
| 1      | 2  | 3      | 18    | 4   | 4  | 3  | 2  | 4  |    |
| 2      | 2  | 3      | 17    | 4   | 3  | 4  | 4  | 3  |    |
| 3      | 1  | 3      | 18    | 3   | 3  | 3  | 3  | 3  |    |
| 4      | 2  | 3      | 17    | 1   | 2  | 3  | 2  | 3  |    |
| 5      | 2  | 3      | 18    | 4   | 4  | 4  | 4  | 4  |    |
| 6      | 1  | 2      | 17    | 3   | 4  | 2  | 3  | 4  |    |
| 7      | 2  | 2      | 17    | 3   | 3  | 2  | 4  | 3  |    |
| 8      | 2  | 2      | 17    | 3   | 3  | 4  | 1  | 2  |    |
| 9      | 1  | 3      | 17    | 4   | 1  | 4  | 1  | 4  |    |
| 10     | 1  | 2      | 18    | 4   | 3  | 4  | 2  | 4  |    |
| 11     | 2  | 2      | 18    | 4   | 2  | 3  | 4  | 2  |    |
| 12     | 1  | 2      | 18    | 3   | 2  | 4  | 3  | 3  |    |
| 13     | 2  | 3      | 18    | 4   | 2  | 4  | 4  | 4  |    |
| 14     | 1  | 2      | 18    | 4   | 4  | 4  | 4  | 4  |    |
| 15     | 2  | 2      | 18    | 4   | 2  | 3  | 3  | 2  |    |
| 16     | 2  | 3      | 18    | 4   | 3  | 4  | 1  | 1  |    |
| 17     | 1  | 2      | 18    | 3   | 3  | 3  | 2  | 2  |    |
| 18     | 2  | 2      | 18    | 4   | 4  | 4  | 4  | 4  |    |
| 19     | 2  | 3      | 18    | 3   | 2  | 4  | 1  | 3  |    |
| 20     | 2  | 2      | 18    | 4   | 1  | 4  | 4  | 2  |    |
| 21     | 2  | 2      | 18    | 3   | 2  | 2  | 2  | 3  |    |
| 22     | 2  | 2      | 18    | 4   | 1  | 3  | 2  | 1  |    |
| 23     | 2  | 2      | 18    | 4   | 3  | 4  | 1  | 4  |    |
| 24     | 1  | 2      | 18    | 3   | 3  | 2  | 3  | 2  |    |
| 25     | 2  | 2      | 18    | 1   | 3  | 3  | 4  | 4  |    |
| 26     | 1  | 2      | 18    | 3   | 4  | 4  | 4  | 3  |    |
| 27     | 2  | 3      | 18    | 3   | 2  | 3  | 4  | 4  |    |
| 28     | 2  | 3      | 18    | 3   | 2  | 3  | 3  | 3  |    |
| 29     | 1  | 3      | 18    | 1   | 3  | 4  | 4  | 3  |    |
| 30     | 2  | 3      | 18    | 4   | 4  | 4  | 3  | 4  |    |
| 31     | 2  | 2      | 18    | 4   | 3  | 4  | 3  | 3  |    |
| 32     | 2  | 2      | 18    | 4   | 3  | 4  | 1  | 4  |    |
| 33     | 2  | 3      | 18    | 2   | 2  | 3  | 2  | 3  |    |
| 34     | 1  | 3      | 18    | 3   | 3  | 3  | 3  | 3  |    |
| 35     | 1  | 3      | 18    | 4   | 1  | 4  | 4  | 2  |    |
| 36     | 2  | 3      | 18    | 4   | 4  | 1  | 4  | 4  |    |
| 37     | 2  | 3      | 18    | 4   | 3  | 4  | 3  | 4  |    |
| 38     | 1  | 3      | 18    | 4   | 4  | 4  | 4  | 4  |    |
| 39     | 1  | 3      | 18    | 4   | 2  | 3  | 4  | 2  |    |
| 40     | 1  | 3      | 18    | 4   | 4  | 4  | 4  | 4  |    |
| 41     | 2  | 3      | 18    | 2   | 1  | 3  | 1  | 3  |    |
| 42     | 2  | 3      | 18    | 3   | 1  | 3  | 1  | 3  |    |
| 43     | 1  | 3      | 18    | 3   | 3  | 3  | 3  | 3  |    |
| 44     | 1  | 3      | 18    | 3   | 3  | 3  | 3  | 3  |    |
| 45     | 2  | 3      | 18    | 4   | 1  | 1  | 1  | 1  |    |
| 46     | 2  | 3      | 18    | 4   | 4  | 4  | 4  | 4  |    |
| 47     | 1  | 3      | 18    | 3   | 3  | 1  | 1  | 4  |    |
| 48     | 1  | 3      | 18    | 4   | 4  | 4  | 4  | 4  |    |
| 49     | 1  | 3      | 18    | 1   | 1  | 1  | 1  | 2  |    |
| 50     | 1  | 3      | 18    | 4   | 4  | 4  | 4  | 3  |    |
| 51     | 1  | 3      | 18    | 4   | 4  | 4  | 4  | 4  |    |
| 52     | 1  | 3      | 18    | 3   | 1  | 2  | 1  | 4  |    |
| 53     | 1  | 3      | 18    | 2   | 2  | 3  | 2  | 4  |    |

|     |   |   |    |   |   |   |   |   |
|-----|---|---|----|---|---|---|---|---|
| 54  | 1 | 3 | 18 | 3 | 3 | 4 | 3 | 3 |
| 55  | 1 | 3 | 18 | 4 | 3 | 4 | 3 | 3 |
| 56  | 1 | 2 | 18 | 4 | 4 | 4 | 4 | 4 |
| 57  | 1 | 1 | 16 | 2 | 2 | 2 | 1 | 1 |
| 58  | 1 | 1 | 16 | 4 | 4 | 3 | 2 | 2 |
| 59  | 1 | 1 | 16 | 4 | 4 | 4 | 1 | 4 |
| 60  | 1 | 1 | 16 | 3 | 1 | 1 | 1 | 2 |
| 61  | 1 | 1 | 16 | 1 | 1 | 1 | 1 | 1 |
| 62  | 1 | 1 | 16 | 4 | 2 | 4 | 3 | 3 |
| 63  | 1 | 2 | 18 | 3 | 3 | 4 | 4 | 3 |
| 64  | 2 | 1 | 16 | 2 | 3 | 4 | 3 | 3 |
| 65  | 2 | 1 | 16 | 4 | 2 | 4 | 2 | 3 |
| 66  | 1 | 1 | 16 | 4 | 1 | 4 | 1 | 4 |
| 67  | 1 | 1 | 16 | 1 | 1 | 4 | 1 | 4 |
| 68  | 1 | 1 | 15 | 4 | 1 | 4 | 1 | 3 |
| 69  | 1 | 1 | 15 | 4 | 1 | 4 | 1 | 4 |
| 70  | 2 | 1 | 15 | 1 | 1 | 1 | 1 | 1 |
| 71  | 2 | 1 | 15 | 4 | 4 | 3 | 2 | 4 |
| 72  | 1 | 1 | 15 | 1 | 3 | 4 | 1 | 4 |
| 73  | 2 | 1 | 15 | 4 | 3 | 3 | 3 | 3 |
| 74  | 2 | 1 | 15 | 3 | 3 | 3 | 2 | 3 |
| 75  | 2 | 1 | 15 | 4 | 2 | 4 | 4 | 4 |
| 76  | 1 | 1 | 15 | 3 | 3 | 2 | 4 | 2 |
| 77  | 2 | 1 | 18 | 4 | 3 | 2 | 4 | 4 |
| 78  | 2 | 1 | 18 | 1 | 1 | 3 | 1 | 3 |
| 79  | 1 | 1 | 18 | 3 | 4 | 4 | 3 | 4 |
| 80  | 2 | 1 | 18 | 1 | 1 | 3 | 2 | 4 |
| 81  | 1 | 1 | 18 | 3 | 3 | 3 | 3 | 3 |
| 82  | 2 | 1 | 18 | 2 | 4 | 1 | 4 | 1 |
| 83  | 2 | 1 | 18 | 4 | 2 | 4 | 1 | 1 |
| 84  | 2 | 1 | 18 | 3 | 1 | 3 | 2 | 2 |
| 85  | 2 | 1 | 18 | 2 | 4 | 2 | 4 | 4 |
| 86  | 1 | 1 | 18 | 3 | 2 | 3 | 2 | 3 |
| 87  | 2 | 1 | 18 | 3 | 4 | 4 | 4 | 2 |
| 88  | 1 | 1 | 18 | 3 | 3 | 4 | 3 | 2 |
| 89  | 2 | 1 | 18 | 4 | 1 | 3 | 1 | 4 |
| 90  | 2 | 1 | 18 | 4 | 1 | 4 | 1 | 4 |
| 91  | 2 | 1 | 18 | 3 | 2 | 2 | 3 | 4 |
| 92  | 1 | 1 | 18 | 4 | 3 | 4 | 2 | 4 |
| 93  | 2 | 1 | 18 | 4 | 2 | 4 | 2 | 4 |
| 94  | 1 | 1 | 18 | 3 | 3 | 3 | 3 | 3 |
| 95  | 1 | 1 | 18 | 3 | 2 | 3 | 2 | 3 |
| 96  | 1 | 1 | 18 | 4 | 4 | 1 | 4 | 1 |
| 97  | 2 | 1 | 18 | 4 | 3 | 4 | 1 | 3 |
| 98  | 1 | 1 | 18 | 2 | 3 | 4 | 2 | 4 |
| 99  | 1 | 1 | 18 | 4 | 3 | 4 | 3 | 3 |
| 100 | 1 | 2 | 18 | 2 | 3 | 3 | 2 | 3 |
| 101 | 1 | 1 | 18 | 4 | 1 | 3 | 3 | 4 |
| 102 | 2 | 1 | 18 | 4 | 1 | 4 | 1 | 4 |
| 103 | 1 | 1 | 18 | 3 | 1 | 4 | 1 | 4 |
| 104 | 2 | 1 | 17 | 2 | 1 | 3 | 1 | 3 |
| 105 | 2 | 1 | 17 | 4 | 1 | 4 | 1 | 4 |
| 106 | 2 | 1 | 17 | 4 | 2 | 3 | 3 | 1 |
| 107 | 1 | 1 | 17 | 3 | 3 | 3 | 4 | 3 |

|     |   |   |    |   |   |   |   |   |
|-----|---|---|----|---|---|---|---|---|
| 108 | 1 | 1 | 17 | 4 | 3 | 3 | 3 | 3 |
| 109 | 1 | 1 | 17 | 3 | 3 | 3 | 3 | 4 |
| 110 | 2 | 1 | 17 | 4 | 3 | 3 | 2 | 3 |
| 111 | 2 | 1 | 17 | 4 | 4 | 4 | 4 | 4 |
| 112 | 2 | 2 | 17 | 4 | 2 | 4 | 3 | 4 |
| 113 | 2 | 2 | 17 | 4 | 4 | 4 | 3 | 4 |
| 114 | 2 | 1 | 16 | 4 | 3 | 4 | 1 | 3 |
| 115 | 1 | 2 | 17 | 4 | 4 | 4 | 1 | 4 |
| 116 | 2 | 1 | 16 | 4 | 3 | 3 | 1 | 4 |
| 117 | 1 | 2 | 17 | 3 | 4 | 4 | 4 | 4 |
| 118 | 1 | 2 | 17 | 3 | 4 | 3 | 4 | 3 |
| 119 | 1 | 2 | 17 | 3 | 1 | 2 | 2 | 2 |
| 120 | 1 | 2 | 17 | 4 | 2 | 3 | 3 | 3 |
| 121 | 2 | 1 | 16 | 4 | 3 | 4 | 3 | 4 |
| 122 | 2 | 1 | 16 | 4 | 1 | 3 | 3 | 4 |
| 123 | 2 | 1 | 16 | 3 | 3 | 3 | 4 | 3 |
| 124 | 2 | 1 | 16 | 4 | 3 | 3 | 3 | 2 |
| 125 | 1 | 2 | 17 | 2 | 1 | 3 | 1 | 4 |
| 126 | 2 | 2 | 17 | 3 | 3 | 4 | 3 | 4 |
| 127 | 1 | 1 | 16 | 4 | 4 | 4 | 4 | 4 |
| 128 | 1 | 1 | 16 | 3 | 2 | 3 | 2 | 3 |
| 129 | 1 | 1 | 16 | 4 | 4 | 4 | 4 | 4 |
| 130 | 2 | 1 | 16 | 4 | 4 | 4 | 4 | 4 |
| 131 | 2 | 1 | 16 | 4 | 4 | 4 | 4 | 3 |
| 132 | 2 | 2 | 17 | 4 | 3 | 3 | 2 | 3 |
| 133 | 2 | 2 | 17 | 3 | 3 | 2 | 3 | 2 |
| 134 | 2 | 2 | 17 | 2 | 3 | 3 | 2 | 3 |
| 135 | 2 | 1 | 16 | 4 | 2 | 3 | 3 | 3 |
| 136 | 2 | 2 | 17 | 3 | 4 | 2 | 4 | 3 |
| 137 | 1 | 2 | 17 | 4 | 4 | 4 | 4 | 4 |
| 138 | 2 | 1 | 16 | 4 | 1 | 4 | 4 | 4 |
| 139 | 2 | 2 | 17 | 1 | 1 | 4 | 1 | 3 |
| 140 | 1 | 1 | 16 | 3 | 3 | 3 | 3 | 3 |
| 141 | 2 | 2 | 17 | 1 | 1 | 4 | 2 | 2 |
| 142 | 1 | 1 | 16 | 4 | 1 | 3 | 1 | 4 |
| 143 | 2 | 2 | 17 | 3 | 3 | 3 | 1 | 4 |
| 144 | 2 | 1 | 16 | 1 | 1 | 1 | 1 | 1 |
| 145 | 2 | 1 | 16 | 2 | 1 | 1 | 1 | 3 |
| 146 | 2 | 2 | 17 | 4 | 4 | 3 | 1 | 3 |
| 147 | 1 | 2 | 17 | 2 | 1 | 4 | 2 | 2 |
| 148 | 2 | 1 | 16 | 3 | 4 | 4 | 3 | 4 |
| 149 | 2 | 1 | 16 | 4 | 4 | 3 | 3 | 2 |
| 150 | 1 | 1 | 16 | 4 | 3 | 1 | 4 | 4 |
| 151 | 2 | 2 | 17 | 3 | 2 | 2 | 3 | 3 |
| 152 | 1 | 2 | 17 | 1 | 1 | 2 | 1 | 4 |
| 153 | 1 | 2 | 17 | 3 | 2 | 3 | 2 | 4 |
| 154 | 2 | 1 | 16 | 3 | 3 | 2 | 4 | 4 |
| 155 | 2 | 1 | 16 | 4 | 2 | 3 | 4 | 4 |
| 156 | 2 | 1 | 16 | 3 | 3 | 3 | 2 | 4 |
| 157 | 1 | 1 | 16 | 3 | 2 | 3 | 4 | 2 |
| 158 | 1 | 2 | 17 | 1 | 4 | 4 | 1 | 2 |
| 159 | 1 | 1 | 16 | 4 | 2 | 4 | 4 | 4 |
| 160 | 1 | 2 | 17 | 2 | 2 | 2 | 4 | 3 |
| 161 | 2 | 1 | 16 | 4 | 3 | 2 | 2 | 4 |

|     |   |   |    |   |   |   |   |   |
|-----|---|---|----|---|---|---|---|---|
| 162 | 2 | 2 | 17 | 4 | 2 | 3 | 1 | 4 |
| 163 | 1 | 1 | 16 | 4 | 3 | 2 | 2 | 2 |
| 164 | 2 | 1 | 16 | 4 | 4 | 4 | 3 | 4 |
| 165 | 2 | 1 | 16 | 3 | 3 | 3 | 2 | 3 |
| 166 | 2 | 2 | 17 | 1 | 4 | 4 | 4 | 4 |
| 167 | 1 | 2 | 17 | 1 | 4 | 4 | 1 | 4 |
| 168 | 2 | 1 | 16 | 3 | 2 | 3 | 2 | 3 |
| 169 | 2 | 3 | 16 | 4 | 2 | 3 | 1 | 3 |
| 170 | 2 | 2 | 17 | 2 | 4 | 2 | 4 | 3 |
| 171 | 1 | 1 | 16 | 3 | 2 | 3 | 4 | 4 |
| 172 | 2 | 1 | 16 | 4 | 3 | 4 | 2 | 4 |
| 173 | 2 | 1 | 16 | 1 | 1 | 3 | 3 | 3 |
| 174 | 2 | 1 | 16 | 4 | 3 | 3 | 2 | 3 |
| 175 | 1 | 1 | 16 | 4 | 1 | 4 | 1 | 4 |
| 176 | 2 | 1 | 16 | 2 | 2 | 3 | 2 | 2 |
| 177 | 2 | 2 | 17 | 4 | 1 | 4 | 1 | 4 |
| 178 | 1 | 1 | 16 | 3 | 2 | 2 | 2 | 3 |
| 179 | 1 | 1 | 16 | 3 | 2 | 3 | 2 | 2 |
| 180 | 1 | 2 | 17 | 3 | 4 | 4 | 4 | 4 |
| 181 | 1 | 1 | 16 | 4 | 2 | 3 | 1 | 4 |
| 182 | 1 | 1 | 16 | 4 | 3 | 3 | 2 | 3 |
| 183 | 2 | 2 | 17 | 4 | 2 | 4 | 1 | 4 |
| 184 | 2 | 1 | 16 | 3 | 1 | 3 | 3 | 3 |
| 185 | 2 | 1 | 16 | 1 | 1 | 3 | 1 | 3 |
| 186 | 2 | 1 | 16 | 1 | 4 | 4 | 1 | 1 |
| 187 | 1 | 2 | 17 | 3 | 2 | 4 | 2 | 3 |
| 188 | 2 | 2 | 17 | 4 | 2 | 4 | 3 | 3 |
| 189 | 1 | 1 | 16 | 4 | 4 | 4 | 3 | 3 |
| 190 | 1 | 1 | 16 | 1 | 4 | 2 | 3 | 2 |
| 191 | 2 | 2 | 17 | 4 | 4 | 4 | 4 | 4 |
| 192 | 2 | 2 | 17 | 3 | 1 | 3 | 1 | 2 |
| 193 | 2 | 2 | 17 | 4 | 4 | 4 | 1 | 4 |
| 194 | 1 | 2 | 17 | 4 | 2 | 3 | 2 | 3 |
| 195 | 2 | 1 | 16 | 4 | 2 | 2 | 3 | 4 |
| 196 | 1 | 2 | 17 | 4 | 3 | 3 | 3 | 2 |
| 197 | 1 | 2 | 18 | 3 | 3 | 3 | 3 | 3 |
| 198 | 2 | 2 | 18 | 1 | 2 | 2 | 3 | 3 |
| 199 | 2 | 1 | 16 | 3 | 1 | 4 | 4 | 4 |
| 200 | 1 | 2 | 18 | 4 | 2 | 3 | 2 | 3 |
| 201 | 1 | 1 | 16 | 4 | 3 | 4 | 4 | 3 |
| 202 | 2 | 1 | 16 | 4 | 4 | 4 | 4 | 4 |
| 203 | 2 | 2 | 18 | 3 | 3 | 3 | 3 | 3 |
| 204 | 1 | 2 | 18 | 4 | 1 | 4 | 4 | 3 |
| 205 | 2 | 1 | 16 | 3 | 2 | 3 | 2 | 4 |
| 206 | 2 | 2 | 18 | 1 | 1 | 3 | 3 | 2 |
| 207 | 2 | 2 | 18 | 3 | 3 | 3 | 2 | 3 |
| 208 | 1 | 2 | 18 | 4 | 2 | 2 | 2 | 4 |
| 209 | 2 | 2 | 18 | 1 | 4 | 4 | 1 | 4 |
| 210 | 1 | 2 | 18 | 4 | 3 | 4 | 3 | 4 |
| 211 | 1 | 1 | 16 | 1 | 1 | 4 | 4 | 4 |
| 212 | 1 | 2 | 18 | 4 | 1 | 1 | 1 | 4 |
| 213 | 1 | 1 | 16 | 3 | 2 | 4 | 1 | 3 |
| 214 | 1 | 2 | 18 | 4 | 2 | 4 | 1 | 4 |
| 215 | 1 | 1 | 16 | 4 | 3 | 3 | 4 | 4 |



|     |   |   |    |   |   |   |   |   |
|-----|---|---|----|---|---|---|---|---|
| 216 | 2 | 1 | 16 | 4 | 4 | 4 | 3 | 4 |
| 217 | 1 | 2 | 18 | 4 | 4 | 4 | 4 | 4 |
| 218 | 1 | 2 | 18 | 4 | 4 | 4 | 4 | 4 |
| 219 | 2 | 2 | 18 | 2 | 3 | 2 | 2 | 2 |
| 220 | 2 | 1 | 16 | 3 | 2 | 3 | 3 | 3 |
| 221 | 1 | 1 | 16 | 4 | 4 | 4 | 4 | 4 |
| 222 | 2 | 2 | 18 | 4 | 4 | 4 | 4 | 4 |
| 223 | 2 | 2 | 18 | 1 | 1 | 4 | 2 | 4 |
| 224 | 2 | 2 | 18 | 4 | 3 | 4 | 4 | 4 |
| 225 | 2 | 2 | 18 | 3 | 2 | 3 | 2 | 3 |
| 226 | 2 | 2 | 18 | 4 | 4 | 4 | 1 | 4 |
| 227 | 1 | 1 | 16 | 4 | 2 | 4 | 4 | 4 |
| 228 | 2 | 2 | 18 | 1 | 1 | 4 | 2 | 4 |
| 229 | 2 | 1 | 16 | 1 | 2 | 4 | 2 | 3 |
| 230 | 1 | 2 | 18 | 4 | 2 | 4 | 1 | 4 |
| 231 | 1 | 3 | 18 | 4 | 3 | 4 | 3 | 4 |
| 232 | 1 | 1 | 16 | 4 | 4 | 3 | 3 | 3 |
| 233 | 1 | 2 | 18 | 3 | 1 | 3 | 1 | 3 |
| 234 | 2 | 2 | 18 | 3 | 2 | 3 | 1 | 3 |
| 235 | 2 | 2 | 18 | 3 | 2 | 3 | 3 | 3 |
| 236 | 1 | 2 | 18 | 3 | 3 | 3 | 2 | 4 |
| 237 | 2 | 2 | 18 | 3 | 4 | 4 | 4 | 3 |
| 238 | 2 | 2 | 18 | 4 | 2 | 3 | 3 | 4 |
| 239 | 1 | 2 | 18 | 3 | 4 | 2 | 1 | 2 |
| 240 | 1 | 2 | 18 | 4 | 4 | 3 | 4 | 4 |
| 241 | 1 | 2 | 16 | 4 | 2 | 3 | 3 | 4 |
| 242 | 2 | 2 | 16 | 2 | 2 | 2 | 2 | 2 |
| 243 | 2 | 2 | 16 | 4 | 4 | 4 | 2 | 4 |
| 244 | 2 | 2 | 16 | 4 | 4 | 4 | 4 | 4 |
| 245 | 2 | 2 | 16 | 3 | 1 | 4 | 1 | 3 |
| 246 | 2 | 2 | 16 | 2 | 2 | 2 | 2 | 2 |
| 247 | 2 | 1 | 16 | 2 | 4 | 4 | 4 | 1 |
| 248 | 1 | 3 | 18 | 3 | 4 | 3 | 3 | 3 |
| 249 | 1 | 2 | 16 | 4 | 4 | 4 | 4 | 4 |
| 250 | 2 | 1 | 16 | 4 | 1 | 4 | 1 | 3 |
| 251 | 2 | 1 | 16 | 4 | 4 | 4 | 3 | 3 |
| 252 | 2 | 2 | 16 | 4 | 2 | 4 | 1 | 4 |
| 253 | 1 | 2 | 16 | 4 | 3 | 2 | 4 | 4 |
| 254 | 1 | 2 | 16 | 4 | 4 | 4 | 4 | 4 |
| 255 | 1 | 1 | 16 | 4 | 1 | 4 | 1 | 4 |
| 256 | 1 | 1 | 16 | 4 | 2 | 3 | 3 | 4 |
| 257 | 1 | 1 | 16 | 3 | 3 | 4 | 3 | 3 |
| 258 | 1 | 2 | 16 | 1 | 2 | 4 | 4 | 2 |
| 259 | 1 | 2 | 16 | 4 | 4 | 4 | 4 | 4 |
| 260 | 2 | 1 | 16 | 4 | 4 | 3 | 4 | 3 |
| 261 | 2 | 2 | 16 | 4 | 3 | 3 | 3 | 4 |
| 262 | 1 | 1 | 16 | 3 | 3 | 3 | 4 | 4 |
| 263 | 1 | 1 | 16 | 4 | 4 | 4 | 3 | 3 |
| 264 | 1 | 1 | 16 | 4 | 4 | 4 | 3 | 3 |
| 265 | 1 | 1 | 16 | 4 | 1 | 4 | 2 | 3 |
| 266 | 1 | 2 | 16 | 4 | 1 | 4 | 2 | 3 |
| 267 | 1 | 1 | 16 | 1 | 1 | 4 | 1 | 4 |
| 268 | 2 | 2 | 16 | 3 | 2 | 3 | 1 | 3 |
| 269 | 2 | 2 | 16 | 3 | 2 | 2 | 2 | 2 |

|     |   |   |    |   |   |   |   |   |
|-----|---|---|----|---|---|---|---|---|
| 270 | 2 | 2 | 16 | 4 | 1 | 3 | 2 | 4 |
| 271 | 1 | 2 | 16 | 4 | 3 | 4 | 1 | 4 |
| 272 | 1 | 1 | 16 | 3 | 2 | 1 | 1 | 3 |
| 273 | 1 | 1 | 16 | 3 | 3 | 3 | 3 | 3 |
| 274 | 1 | 2 | 16 | 3 | 2 | 3 | 2 | 4 |
| 275 | 1 | 2 | 16 | 2 | 3 | 3 | 3 | 3 |
| 276 | 1 | 2 | 16 | 3 | 3 | 3 | 3 | 3 |
| 277 | 1 | 2 | 16 | 4 | 4 | 4 | 2 | 2 |
| 278 | 1 | 1 | 16 | 2 | 1 | 4 | 4 | 1 |
| 279 | 2 | 2 | 16 | 2 | 2 | 2 | 3 | 3 |
| 280 | 2 | 1 | 16 | 4 | 2 | 3 | 1 | 3 |
| 281 | 2 | 2 | 16 | 4 | 4 | 4 | 3 | 3 |
| 282 | 2 | 1 | 16 | 4 | 3 | 4 | 4 | 4 |
| 283 | 1 | 1 | 16 | 1 | 1 | 3 | 1 | 3 |
| 284 | 1 | 1 | 16 | 4 | 4 | 4 | 2 | 4 |
| 285 | 1 | 1 | 16 | 4 | 3 | 3 | 3 | 3 |
| 286 | 2 | 2 | 16 | 4 | 1 | 4 | 4 | 4 |
| 287 | 1 | 2 | 16 | 1 | 1 | 1 | 1 | 1 |
| 288 | 1 | 2 | 16 | 1 | 1 | 1 | 1 | 1 |
| 289 | 2 | 3 | 18 | 3 | 3 | 3 | 3 | 2 |
| 290 | 1 | 3 | 18 | 4 | 4 | 4 | 4 | 4 |
| 291 | 1 | 3 | 18 | 3 | 3 | 3 | 3 | 3 |
| 292 | 2 | 3 | 18 | 4 | 3 | 4 | 3 | 4 |
| 293 | 2 | 3 | 18 | 3 | 2 | 3 | 4 | 3 |
| 294 | 1 | 3 | 18 | 3 | 3 | 3 | 3 | 3 |
| 295 | 1 | 3 | 18 | 4 | 2 | 4 | 2 | 4 |
| 296 | 1 | 2 | 16 | 2 | 2 | 3 | 3 | 1 |
| 297 | 2 | 3 | 18 | 3 | 2 | 3 | 2 | 2 |
| 298 | 1 | 1 | 16 | 4 | 1 | 4 | 4 | 1 |
| 299 | 2 | 1 | 16 | 4 | 4 | 4 | 1 | 4 |
| 300 | 2 | 1 | 16 | 1 | 4 | 4 | 4 | 3 |
| 301 | 2 | 1 | 16 | 3 | 1 | 2 | 1 | 4 |
| 302 | 2 | 1 | 16 | 1 | 4 | 3 | 2 | 2 |
| 303 | 2 | 1 | 16 | 3 | 2 | 3 | 1 | 3 |
| 304 | 1 | 3 | 18 | 3 | 2 | 3 | 2 | 3 |
| 305 | 2 | 3 | 18 | 1 | 1 | 2 | 2 | 1 |
| 306 | 1 | 3 | 18 | 4 | 3 | 4 | 3 | 3 |
| 307 | 2 | 3 | 18 | 4 | 1 | 3 | 1 | 3 |
| 308 | 2 | 3 | 18 | 4 | 3 | 3 | 3 | 3 |
| 309 | 1 | 3 | 18 | 4 | 2 | 4 | 3 | 3 |
| 310 | 2 | 3 | 18 | 3 | 3 | 3 | 3 | 3 |
| 311 | 2 | 3 | 18 | 4 | 3 | 4 | 4 | 4 |
| 312 | 1 | 3 | 18 | 2 | 2 | 3 | 1 | 3 |
| 313 | 2 | 3 | 18 | 3 | 3 | 3 | 3 | 3 |
| 314 | 2 | 3 | 18 | 3 | 3 | 3 | 3 | 3 |
| 315 | 2 | 3 | 18 | 2 | 3 | 3 | 3 | 3 |
| 316 | 2 | 3 | 18 | 3 | 1 | 3 | 3 | 3 |
| 317 | 1 | 3 | 18 | 1 | 3 | 3 | 1 | 3 |
| 318 | 1 | 3 | 18 | 1 | 1 | 2 | 1 | 2 |
| 319 | 2 | 3 | 18 | 2 | 2 | 4 | 3 | 2 |
| 320 | 1 | 3 | 18 | 4 | 2 | 2 | 3 | 2 |
| 321 | 2 | 3 | 18 | 4 | 1 | 4 | 1 | 4 |
| 322 | 2 | 3 | 18 | 4 | 4 | 4 | 3 | 2 |
| 323 | 2 | 3 | 18 | 3 | 3 | 3 | 3 | 2 |

|     |   |   |    |   |   |   |   |   |
|-----|---|---|----|---|---|---|---|---|
| 324 | 2 | 3 | 18 | 4 | 3 | 4 | 2 | 4 |
| 325 | 2 | 3 | 18 | 2 | 2 | 3 | 3 | 3 |
| 326 | 2 | 3 | 18 | 4 | 1 | 4 | 4 | 2 |
| 327 | 2 | 3 | 18 | 4 | 4 | 4 | 4 | 3 |
| 328 | 1 | 3 | 16 | 4 | 4 | 4 | 4 | 4 |
| 329 | 2 | 3 | 18 | 3 | 3 | 4 | 4 | 2 |
| 330 | 1 | 3 | 18 | 4 | 1 | 4 | 1 | 4 |
| 331 | 2 | 3 | 18 | 3 | 4 | 3 | 3 | 3 |
| 332 | 2 | 3 | 18 | 3 | 3 | 2 | 3 | 3 |
| 333 | 2 | 3 | 18 | 4 | 4 | 4 | 4 | 4 |
| 334 | 2 | 3 | 18 | 3 | 2 | 4 | 3 | 3 |
| 335 | 2 | 3 | 18 | 3 | 3 | 3 | 3 | 3 |
| 336 | 1 | 3 | 18 | 4 | 4 | 4 | 2 | 4 |
| 337 | 2 | 3 | 18 | 2 | 3 | 3 | 3 | 3 |
| 338 | 2 | 3 | 18 | 4 | 3 | 2 | 1 | 4 |
| 339 | 2 | 3 | 18 | 4 | 4 | 4 | 4 | 4 |
| 340 | 1 | 3 | 18 | 4 | 4 | 4 | 4 | 4 |
| 341 | 2 | 3 | 18 | 3 | 2 | 3 | 2 | 3 |
| 342 | 2 | 3 | 18 | 3 | 4 | 3 | 4 | 3 |
| 343 | 2 | 3 | 18 | 4 | 3 | 2 | 3 | 3 |
| 344 | 2 | 3 | 18 | 3 | 2 | 2 | 4 | 3 |
| 345 | 2 | 3 | 18 | 3 | 3 | 3 | 4 | 3 |
| 346 | 2 | 3 | 18 | 4 | 3 | 4 | 1 | 4 |
| 347 | 2 | 3 | 18 | 4 | 1 | 4 | 2 | 4 |
| 348 | 2 | 3 | 18 | 3 | 2 | 2 | 1 | 1 |
| 349 | 2 | 3 | 18 | 4 | 4 | 4 | 3 | 4 |
| 350 | 1 | 3 | 18 | 3 | 3 | 3 | 4 | 3 |
| 351 | 2 | 3 | 18 | 4 | 2 | 4 | 3 | 3 |
| 352 | 2 | 3 | 18 | 3 | 3 | 2 | 3 | 3 |
| 353 | 2 | 3 | 18 | 3 | 2 | 3 | 3 | 2 |
| 354 | 2 | 3 | 18 | 1 | 3 | 3 | 4 | 3 |
| 355 | 2 | 3 | 18 | 2 | 3 | 3 | 3 | 3 |
| 356 | 1 | 3 | 18 | 4 | 4 | 4 | 4 | 3 |
| 357 | 1 | 3 | 18 | 1 | 3 | 4 | 4 | 3 |
| 358 | 1 | 3 | 18 | 4 | 3 | 3 | 1 | 3 |
| 359 | 1 | 3 | 18 | 3 | 3 | 3 | 3 | 1 |
| 360 | 2 | 3 | 18 | 3 | 3 | 4 | 4 | 4 |
| 361 | 2 | 3 | 18 | 4 | 3 | 3 | 3 | 3 |
| 362 | 2 | 3 | 18 | 4 | 2 | 3 | 1 | 3 |
| 363 | 2 | 3 | 18 | 4 | 4 | 1 | 4 | 4 |
| 364 | 2 | 3 | 18 | 4 | 2 | 3 | 3 | 2 |
| 365 | 2 | 3 | 18 | 4 | 2 | 4 | 4 | 3 |
| 366 | 2 | 3 | 18 | 3 | 3 | 3 | 2 | 2 |
| 367 | 2 | 3 | 18 | 3 | 2 | 3 | 1 | 2 |
| 368 | 2 | 3 | 18 | 3 | 2 | 3 | 4 | 4 |
| 369 | 1 | 3 | 18 | 3 | 4 | 4 | 4 | 4 |
| 370 | 2 | 3 | 18 | 4 | 1 | 4 | 1 | 4 |
| 371 | 1 | 3 | 18 | 3 | 3 | 3 | 3 | 3 |
| 372 | 1 | 3 | 18 | 1 | 1 | 3 | 1 | 3 |
| 373 | 1 | 3 | 18 | 4 | 3 | 4 | 3 | 3 |
| 374 | 1 | 3 | 18 | 4 | 1 | 1 | 1 | 1 |
| 375 | 1 | 3 | 18 | 4 | 1 | 3 | 2 | 3 |
| 376 | 1 | 3 | 18 | 3 | 3 | 3 | 3 | 2 |
| 377 | 1 | 3 | 18 | 1 | 1 | 3 | 2 | 3 |

|     |   |   |    |   |   |   |   |   |
|-----|---|---|----|---|---|---|---|---|
| 378 | 1 | 3 | 18 | 3 | 2 | 3 | 2 | 3 |
| 379 | 1 | 3 | 18 | 4 | 4 | 4 | 4 | 4 |
| 380 | 1 | 3 | 18 | 4 | 2 | 4 | 3 | 3 |
| 381 | 1 | 3 | 18 | 3 | 2 | 2 | 3 | 3 |
| 382 | 1 | 3 | 18 | 3 | 3 | 2 | 3 | 2 |
| 383 | 2 | 3 | 18 | 4 | 1 | 4 | 1 | 4 |
| 384 | 1 | 3 | 18 | 3 | 2 | 3 | 1 | 3 |
| 385 | 2 | 3 | 18 | 4 | 2 | 2 | 2 | 3 |
| 386 | 1 | 3 | 18 | 4 | 2 | 4 | 3 | 4 |
| 387 | 2 | 3 | 18 | 4 | 3 | 4 | 2 | 4 |
| 388 | 2 | 3 | 18 | 4 | 3 | 3 | 3 | 3 |
| 389 | 2 | 3 | 18 | 4 | 4 | 4 | 4 | 3 |
| 390 | 1 | 3 | 18 | 3 | 2 | 3 | 1 | 3 |
| 391 | 2 | 3 | 18 | 3 | 4 | 3 | 3 | 4 |
| 392 | 1 | 3 | 18 | 4 | 1 | 2 | 1 | 2 |
| 393 | 1 | 3 | 18 | 3 | 4 | 4 | 4 | 4 |
| 394 | 2 | 3 | 18 | 3 | 1 | 4 | 2 | 3 |
| 395 | 2 | 3 | 18 | 3 | 2 | 2 | 4 | 3 |
| 396 | 1 | 3 | 18 | 4 | 4 | 4 | 4 | 4 |
| 397 | 1 | 3 | 18 | 4 | 3 | 4 | 4 | 4 |
| 398 | 1 | 3 | 18 | 3 | 3 | 4 | 1 | 4 |
| 399 | 2 | 3 | 18 | 4 | 1 | 3 | 1 | 3 |
| 400 | 1 | 3 | 18 | 3 | 2 | 3 | 3 | 3 |
| 401 | 1 | 3 | 18 | 3 | 3 | 4 | 2 | 4 |
| 402 | 2 | 3 | 18 | 1 | 4 | 2 | 4 | 2 |
| 403 | 2 | 3 | 18 | 1 | 1 | 1 | 1 | 2 |
| 404 | 1 | 3 | 18 | 3 | 1 | 3 | 1 | 3 |
| 405 | 2 | 3 | 18 | 4 | 3 | 3 | 4 | 3 |
| 406 | 2 | 3 | 18 | 1 | 1 | 2 | 2 | 1 |
| 407 | 2 | 3 | 18 | 4 | 4 | 3 | 4 | 4 |
| 408 | 1 | 1 | 16 | 3 | 4 | 3 | 2 | 3 |
| 409 | 1 | 3 | 18 | 3 | 3 | 3 | 3 | 3 |
| 410 | 1 | 3 | 18 | 3 | 2 | 3 | 3 | 4 |
| 411 | 2 | 1 | 16 | 3 | 1 | 2 | 1 | 3 |
| 412 | 2 | 2 | 18 | 4 | 3 | 4 | 3 | 3 |
| 413 | 2 | 3 | 18 | 4 | 2 | 3 | 4 | 1 |
| 414 | 1 | 3 | 18 | 4 | 4 | 4 | 4 | 4 |
| 415 | 2 | 3 | 18 | 2 | 4 | 3 | 4 | 4 |
| 416 | 2 | 3 | 18 | 4 | 4 | 4 | 1 | 4 |
| 417 | 2 | 3 | 18 | 4 | 3 | 3 | 3 | 3 |
| 418 | 2 | 3 | 18 | 4 | 1 | 4 | 2 | 3 |
| 419 | 2 | 3 | 18 | 1 | 2 | 4 | 3 | 3 |
| 420 | 2 | 3 | 18 | 4 | 2 | 3 | 3 | 2 |
| 421 | 2 | 3 | 18 | 2 | 2 | 3 | 2 | 4 |
| 422 | 1 | 3 | 18 | 3 | 3 | 3 | 3 | 3 |
| 423 | 2 | 3 | 18 | 4 | 1 | 4 | 4 | 4 |
| 424 | 2 | 3 | 18 | 2 | 1 | 3 | 3 | 3 |
| 425 | 2 | 3 | 18 | 2 | 4 | 4 | 4 | 1 |
| 426 | 1 | 3 | 18 | 4 | 4 | 4 | 4 | 4 |
| 427 | 2 | 3 | 18 | 2 | 2 | 3 | 3 | 3 |
| 428 | 2 | 3 | 18 | 1 | 4 | 4 | 4 | 3 |
| 429 | 2 | 3 | 18 | 4 | 1 | 4 | 1 | 3 |
| 430 | 2 | 3 | 18 | 4 | 1 | 3 | 1 | 2 |
| 431 | 2 | 3 | 18 | 4 | 3 | 4 | 2 | 4 |

|     |   |   |    |   |   |   |   |   |
|-----|---|---|----|---|---|---|---|---|
| 432 | 2 | 3 | 18 | 4 | 3 | 4 | 4 | 3 |
| 433 | 2 | 3 | 18 | 3 | 4 | 4 | 4 | 2 |
| 434 | 2 | 3 | 18 | 4 | 4 | 4 | 4 | 4 |
| 435 | 2 | 3 | 18 | 2 | 2 | 4 | 3 | 3 |
| 436 | 2 | 3 | 18 | 3 | 2 | 4 | 2 | 2 |
| 437 | 2 | 3 | 18 | 3 | 2 | 4 | 3 | 3 |
| 438 | 2 | 3 | 18 | 4 | 3 | 3 | 1 | 3 |
| 439 | 2 | 3 | 18 | 4 | 1 | 4 | 1 | 3 |
| 440 | 1 | 3 | 18 | 4 | 4 | 4 | 3 | 3 |
| 441 | 1 | 3 | 18 | 4 | 4 | 4 | 4 | 4 |
| 442 | 2 | 3 | 18 | 4 | 3 | 4 | 1 | 3 |
| 443 | 1 | 3 | 18 | 3 | 2 | 4 | 1 | 2 |
| 444 | 1 | 3 | 18 | 3 | 3 | 3 | 3 | 3 |
| 445 | 2 | 3 | 18 | 1 | 4 | 1 | 1 | 2 |
| 446 | 2 | 2 | 18 | 4 | 2 | 4 | 4 | 4 |
| 447 | 2 | 2 | 18 | 4 | 1 | 4 | 1 | 4 |
| 448 | 2 | 3 | 18 | 3 | 4 | 4 | 4 | 4 |
| 449 | 2 | 2 | 18 | 3 | 2 | 3 | 3 | 3 |
| 450 | 2 | 3 | 18 | 4 | 2 | 3 | 2 | 3 |
| 451 | 2 | 2 | 18 | 4 | 4 | 4 | 4 | 4 |
| 452 | 2 | 2 | 18 | 4 | 3 | 3 | 4 | 4 |
| 453 | 1 | 2 | 18 | 4 | 4 | 4 | 3 | 3 |
| 454 | 2 | 3 | 18 | 4 | 1 | 3 | 3 | 4 |
| 455 | 2 | 3 | 18 | 3 | 2 | 3 | 2 | 3 |
| 456 | 2 | 2 | 18 | 4 | 2 | 4 | 3 | 4 |
| 457 | 1 | 2 | 18 | 4 | 2 | 4 | 4 | 2 |
| 458 | 1 | 3 | 18 | 4 | 3 | 3 | 1 | 3 |
| 459 | 2 | 3 | 18 | 3 | 3 | 4 | 2 | 2 |
| 460 | 2 | 2 | 18 | 4 | 3 | 4 | 4 | 4 |
| 461 | 2 | 2 | 18 | 3 | 3 | 3 | 3 | 3 |
| 462 | 2 | 3 | 18 | 4 | 2 | 2 | 2 | 2 |
| 463 | 2 | 3 | 18 | 4 | 2 | 4 | 2 | 4 |
| 464 | 1 | 3 | 18 | 4 | 3 | 3 | 3 | 2 |
| 465 | 2 | 2 | 18 | 3 | 3 | 3 | 2 | 3 |
| 466 | 2 | 2 | 18 | 4 | 4 | 4 | 1 | 4 |
| 467 | 2 | 3 | 18 | 4 | 3 | 3 | 4 | 3 |
| 468 | 2 | 3 | 18 | 3 | 1 | 3 | 1 | 4 |
| 469 | 2 | 3 | 18 | 3 | 3 | 2 | 2 | 3 |
| 470 | 2 | 3 | 18 | 2 | 3 | 4 | 2 | 3 |
| 471 | 2 | 3 | 18 | 3 | 3 | 4 | 2 | 3 |
| 472 | 2 | 3 | 18 | 3 | 3 | 3 | 3 | 2 |
| 473 | 2 | 3 | 18 | 4 | 3 | 4 | 4 | 4 |
| 474 | 2 | 3 | 18 | 4 | 3 | 3 | 3 | 3 |
| 475 | 2 | 3 | 18 | 4 | 1 | 3 | 1 | 2 |
| 476 | 2 | 3 | 18 | 4 | 1 | 4 | 4 | 4 |
| 477 | 2 | 3 | 18 | 2 | 2 | 3 | 2 | 3 |
| 478 | 1 | 3 | 18 | 3 | 4 | 3 | 3 | 3 |
| 479 | 2 | 3 | 18 | 4 | 3 | 3 | 1 | 3 |
| 480 | 2 | 3 | 18 | 4 | 2 | 4 | 1 | 4 |
| 481 | 2 | 3 | 18 | 3 | 2 | 3 | 2 | 3 |
| 482 | 1 | 3 | 18 | 1 | 3 | 3 | 3 | 2 |
| 483 | 2 | 3 | 18 | 3 | 2 | 3 | 2 | 3 |
| 484 | 2 | 3 | 18 | 3 | 3 | 2 | 3 | 3 |
| 485 | 2 | 3 | 18 | 4 | 4 | 4 | 4 | 2 |

|     |   |   |    |   |   |   |   |   |
|-----|---|---|----|---|---|---|---|---|
| 486 | 2 | 2 | 16 | 3 | 3 | 3 | 3 | 3 |
| 487 | 1 | 2 | 16 | 2 | 2 | 2 | 2 | 2 |
| 488 | 1 | 2 | 16 | 4 | 1 | 3 | 1 | 3 |
| 489 | 2 | 2 | 16 | 4 | 2 | 3 | 1 | 1 |
| 490 | 1 | 2 | 16 | 3 | 3 | 3 | 3 | 3 |
| 491 | 1 | 3 | 18 | 3 | 2 | 3 | 2 | 3 |
| 492 | 2 | 2 | 16 | 4 | 2 | 2 | 2 | 2 |
| 493 | 2 | 2 | 16 | 4 | 2 | 3 | 2 | 3 |
| 494 | 1 | 2 | 16 | 3 | 3 | 4 | 4 | 2 |
| 495 | 2 | 3 | 18 | 4 | 3 | 3 | 3 | 3 |
| 496 | 1 | 2 | 16 | 4 | 2 | 2 | 4 | 3 |
| 497 | 2 | 2 | 16 | 1 | 3 | 3 | 1 | 3 |
| 498 | 2 | 2 | 16 | 4 | 2 | 2 | 4 | 2 |
| 499 | 2 | 2 | 16 | 3 | 2 | 3 | 1 | 4 |
| 500 | 2 | 2 | 16 | 3 | 2 | 3 | 2 | 3 |
| 501 | 1 | 2 | 16 | 3 | 3 | 4 | 3 | 3 |
| 502 | 1 | 2 | 16 | 2 | 3 | 3 | 4 | 2 |
| 503 | 2 | 2 | 16 | 2 | 3 | 4 | 3 | 3 |
| 504 | 1 | 2 | 18 | 2 | 2 | 3 | 3 | 3 |
| 505 | 2 | 2 | 16 | 3 | 3 | 4 | 4 | 3 |
| 506 | 2 | 3 | 18 | 4 | 2 | 4 | 4 | 4 |
| 507 | 2 | 2 | 16 | 4 | 2 | 4 | 3 | 3 |
| 508 | 2 | 3 | 18 | 2 | 2 | 2 | 2 | 2 |
| 509 | 2 | 2 | 16 | 3 | 1 | 3 | 4 | 3 |
| 510 | 1 | 2 | 16 | 4 | 2 | 4 | 3 | 4 |
| 511 | 2 | 2 | 16 | 4 | 1 | 4 | 4 | 4 |
| 512 | 2 | 3 | 18 | 3 | 2 | 3 | 1 | 3 |
| 513 | 1 | 2 | 16 | 3 | 3 | 3 | 3 | 3 |
| 514 | 2 | 2 | 16 | 2 | 3 | 3 | 3 | 3 |
| 515 | 2 | 3 | 18 | 3 | 4 | 4 | 3 | 2 |
| 516 | 1 | 2 | 16 | 4 | 4 | 4 | 4 | 4 |
| 517 | 1 | 2 | 16 | 2 | 3 | 3 | 3 | 3 |
| 518 | 1 | 2 | 16 | 4 | 4 | 4 | 4 | 4 |
| 519 | 1 | 2 | 16 | 2 | 2 | 2 | 2 | 2 |
| 520 | 1 | 2 | 16 | 3 | 3 | 3 | 3 | 2 |
| 521 | 1 | 3 | 18 | 4 | 4 | 4 | 4 | 4 |
| 522 | 1 | 2 | 16 | 4 | 4 | 4 | 4 | 4 |
| 523 | 1 | 3 | 18 | 4 | 2 | 4 | 3 | 4 |
| 524 | 1 | 2 | 16 | 4 | 3 | 4 | 3 | 4 |
| 525 | 2 | 2 | 16 | 1 | 1 | 4 | 1 | 1 |
| 526 | 2 | 2 | 18 | 4 | 4 | 4 | 4 | 3 |
| 527 | 2 | 2 | 18 | 2 | 2 | 2 | 2 | 2 |
| 528 | 1 | 2 | 18 | 4 | 4 | 4 | 4 | 4 |
| 529 | 1 | 2 | 18 | 4 | 2 | 3 | 3 | 3 |
| 530 | 2 | 3 | 18 | 3 | 3 | 3 | 2 | 2 |
| 531 | 2 | 3 | 18 | 3 | 3 | 3 | 4 | 3 |
| 532 | 2 | 2 | 18 | 4 | 2 | 3 | 4 | 3 |
| 533 | 2 | 2 | 18 | 3 | 3 | 3 | 3 | 2 |
| 534 | 1 | 3 | 18 | 2 | 3 | 4 | 2 | 3 |
| 535 | 1 | 3 | 18 | 4 | 4 | 4 | 4 | 4 |
| 536 | 2 | 3 | 18 | 2 | 2 | 2 | 2 | 3 |
| 537 | 2 | 2 | 18 | 3 | 1 | 2 | 3 | 3 |
| 538 | 1 | 2 | 18 | 2 | 3 | 2 | 2 | 2 |
| 539 | 1 | 2 | 18 | 2 | 2 | 2 | 2 | 2 |

|     |   |   |    |   |   |   |   |   |
|-----|---|---|----|---|---|---|---|---|
| 540 | 1 | 2 | 18 | 4 | 1 | 3 | 1 | 1 |
| 541 | 1 | 2 | 17 | 4 | 1 | 1 | 1 | 4 |
| 542 | 2 | 3 | 17 | 4 | 2 | 3 | 1 | 3 |
| 543 | 2 | 3 | 17 | 3 | 3 | 3 | 4 | 3 |
| 544 | 1 | 2 | 17 | 4 | 4 | 4 | 1 | 4 |
| 545 | 1 | 2 | 17 | 1 | 1 | 1 | 1 | 1 |
| 546 | 2 | 3 | 17 | 4 | 2 | 4 | 4 | 4 |
| 547 | 1 | 3 | 17 | 1 | 3 | 3 | 1 | 4 |
| 548 | 2 | 2 | 17 | 2 | 2 | 3 | 4 | 2 |
| 549 | 2 | 3 | 17 | 3 | 4 | 4 | 4 | 4 |
| 550 | 1 | 2 | 17 | 3 | 3 | 4 | 1 | 3 |
| 551 | 1 | 3 | 17 | 1 | 2 | 1 | 2 | 3 |
| 552 | 2 | 3 | 17 | 3 | 1 | 3 | 1 | 3 |
| 553 | 1 | 2 | 17 | 3 | 3 | 3 | 3 | 3 |
| 554 | 1 | 2 | 17 | 4 | 2 | 3 | 2 | 3 |
| 555 | 2 | 3 | 17 | 4 | 4 | 3 | 4 | 2 |
| 556 | 2 | 2 | 17 | 3 | 2 | 3 | 4 | 3 |
| 557 | 2 | 2 | 17 | 3 | 1 | 3 | 1 | 1 |
| 558 | 2 | 3 | 17 | 3 | 3 | 3 | 3 | 3 |
| 559 | 1 | 3 | 17 | 4 | 1 | 1 | 1 | 4 |
| 560 | 2 | 3 | 16 | 2 | 2 | 4 | 4 | 4 |
| 561 | 1 | 2 | 17 | 4 | 2 | 2 | 2 | 2 |
| 562 | 2 | 2 | 17 | 3 | 4 | 3 | 3 | 3 |
| 563 | 1 | 2 | 17 | 3 | 2 | 3 | 4 | 3 |
| 564 | 2 | 3 | 17 | 4 | 4 | 3 | 2 | 3 |
| 565 | 2 | 2 | 17 | 4 | 2 | 4 | 2 | 3 |
| 566 | 2 | 3 | 17 | 3 | 2 | 3 | 3 | 3 |
| 567 | 2 | 2 | 17 | 3 | 2 | 4 | 4 | 3 |
| 568 | 2 | 2 | 17 | 2 | 4 | 4 | 4 | 4 |
| 569 | 2 | 2 | 17 | 4 | 3 | 4 | 4 | 4 |
| 570 | 2 | 3 | 17 | 3 | 3 | 3 | 1 | 3 |
| 571 | 2 | 3 | 17 | 3 | 2 | 4 | 3 | 2 |
| 572 | 1 | 2 | 17 | 4 | 4 | 4 | 4 | 4 |
| 573 | 2 | 2 | 17 | 4 | 3 | 3 | 3 | 2 |
| 574 | 2 | 2 | 17 | 3 | 2 | 4 | 1 | 2 |
| 575 | 1 | 2 | 17 | 3 | 3 | 3 | 3 | 3 |
| 576 | 2 | 2 | 17 | 2 | 2 | 3 | 2 | 3 |
| 577 | 1 | 2 | 17 | 3 | 2 | 2 | 2 | 2 |
| 578 | 1 | 1 | 16 | 4 | 2 | 3 | 1 | 4 |
| 579 | 2 | 3 | 17 | 2 | 2 | 3 | 3 | 3 |
| 580 | 1 | 2 | 17 | 4 | 4 | 4 | 4 | 4 |
| 581 | 1 | 1 | 16 | 1 | 1 | 1 | 1 | 4 |
| 582 | 1 | 2 | 17 | 3 | 2 | 4 | 1 | 3 |
| 583 | 2 | 2 | 17 | 3 | 2 | 4 | 2 | 3 |
| 584 | 2 | 2 | 17 | 4 | 3 | 4 | 2 | 4 |
| 585 | 1 | 2 | 17 | 3 | 3 | 3 | 3 | 3 |
| 586 | 2 | 2 | 17 | 4 | 4 | 4 | 4 | 4 |
| 587 | 2 | 1 | 16 | 3 | 3 | 3 | 3 | 3 |
| 588 | 1 | 1 | 16 | 3 | 4 | 4 | 4 | 4 |
| 589 | 2 | 1 | 16 | 3 | 2 | 3 | 3 | 3 |
| 590 | 2 | 1 | 16 | 3 | 2 | 3 | 4 | 4 |
| 591 | 2 | 1 | 16 | 4 | 4 | 2 | 4 | 2 |
| 592 | 1 | 1 | 16 | 4 | 4 | 4 | 4 | 4 |
| 593 | 2 | 1 | 16 | 3 | 2 | 4 | 1 | 4 |

|     |   |   |    |   |   |   |   |   |
|-----|---|---|----|---|---|---|---|---|
| 594 | 2 | 1 | 16 | 4 | 1 | 4 | 1 | 4 |
| 595 | 2 | 1 | 16 | 3 | 3 | 4 | 3 | 3 |
| 596 | 2 | 1 | 16 | 2 | 1 | 3 | 1 | 3 |
| 597 | 1 | 1 | 16 | 3 | 2 | 3 | 2 | 3 |
| 598 | 2 | 1 | 16 | 4 | 3 | 3 | 4 | 4 |
| 599 | 1 | 1 | 16 | 4 | 1 | 4 | 1 | 3 |
| 600 | 2 | 1 | 16 | 4 | 2 | 2 | 1 | 3 |
| 601 | 1 | 1 | 16 | 3 | 2 | 3 | 2 | 4 |
| 602 | 1 | 1 | 16 | 4 | 4 | 3 | 3 | 3 |
| 603 | 1 | 1 | 16 | 4 | 1 | 4 | 1 | 4 |
| 604 | 1 | 1 | 16 | 3 | 2 | 3 | 3 | 3 |
| 605 | 1 | 1 | 16 | 3 | 2 | 3 | 2 | 4 |
| 606 | 2 | 1 | 16 | 2 | 2 | 3 | 1 | 2 |
| 607 | 1 | 1 | 16 | 4 | 4 | 4 | 4 | 4 |
| 608 | 1 | 1 | 16 | 4 | 3 | 3 | 4 | 3 |
| 609 | 2 | 1 | 16 | 4 | 4 | 4 | 4 | 4 |
| 610 | 2 | 1 | 16 | 1 | 2 | 3 | 1 | 4 |
| 611 | 1 | 1 | 16 | 4 | 4 | 4 | 4 | 4 |
| 612 | 1 | 1 | 16 | 4 | 4 | 4 | 4 | 4 |
| 613 | 2 | 1 | 16 | 1 | 1 | 1 | 1 | 4 |
| 614 | 2 | 1 | 16 | 3 | 3 | 4 | 4 | 3 |
| 615 | 1 | 1 | 16 | 1 | 2 | 4 | 1 | 4 |
| 616 | 1 | 1 | 16 | 3 | 2 | 4 | 2 | 4 |
| 617 | 2 | 1 | 16 | 3 | 3 | 3 | 1 | 4 |
| 618 | 1 | 1 | 16 | 4 | 4 | 4 | 1 | 4 |
| 619 | 1 | 1 | 16 | 4 | 1 | 4 | 2 | 4 |
| 620 | 1 | 1 | 16 | 4 | 4 | 4 | 3 | 4 |
| 621 | 2 | 1 | 16 | 2 | 2 | 3 | 1 | 4 |
| 622 | 2 | 3 | 17 | 3 | 4 | 4 | 3 | 2 |
| 623 | 2 | 1 | 16 | 1 | 1 | 1 | 1 | 4 |
| 624 | 2 | 1 | 16 | 3 | 2 | 3 | 4 | 3 |
| 625 | 1 | 1 | 16 | 4 | 4 | 4 | 4 | 4 |
| 626 | 2 | 1 | 16 | 4 | 1 | 4 | 1 | 4 |
| 627 | 1 | 1 | 16 | 4 | 1 | 4 | 1 | 4 |
| 628 | 2 | 3 | 17 | 3 | 3 | 4 | 4 | 3 |
| 629 | 2 | 3 | 17 | 2 | 2 | 3 | 1 | 3 |
| 630 | 2 | 1 | 16 | 4 | 3 | 3 | 3 | 3 |
| 631 | 1 | 1 | 16 | 4 | 1 | 4 | 1 | 4 |
| 632 | 2 | 1 | 16 | 1 | 1 | 1 | 1 | 4 |
| 633 | 2 | 1 | 16 | 4 | 3 | 4 | 4 | 4 |
| 634 | 2 | 1 | 16 | 4 | 3 | 4 | 3 | 4 |
| 635 | 1 | 1 | 16 | 1 | 1 | 4 | 1 | 4 |
| 636 | 2 | 1 | 16 | 4 | 1 | 4 | 1 | 4 |
| 637 | 2 | 1 | 16 | 3 | 2 | 3 | 2 | 4 |
| 638 | 1 | 1 | 16 | 1 | 2 | 2 | 1 | 1 |
| 639 | 1 | 1 | 16 | 4 | 4 | 4 | 4 | 4 |
| 640 | 2 | 1 | 16 | 4 | 1 | 4 | 1 | 4 |
| 641 | 1 | 1 | 16 | 4 | 3 | 4 | 4 | 4 |
| 642 | 1 | 1 | 16 | 4 | 3 | 3 | 3 | 3 |
| 643 | 2 | 1 | 16 | 4 | 2 | 4 | 3 | 4 |
| 644 | 2 | 1 | 16 | 2 | 3 | 2 | 3 | 2 |
| 645 | 1 | 1 | 16 | 4 | 4 | 4 | 4 | 4 |
| 646 | 1 | 1 | 16 | 3 | 4 | 3 | 2 | 3 |
| 647 | 2 | 1 | 16 | 3 | 2 | 4 | 1 | 4 |



|     |   |   |    |   |   |   |   |   |
|-----|---|---|----|---|---|---|---|---|
| 648 | 1 | 1 | 16 | 4 | 1 | 2 | 3 | 4 |
| 649 | 2 | 1 | 16 | 3 | 3 | 2 | 2 | 3 |
| 650 | 1 | 1 | 16 | 3 | 2 | 4 | 1 | 4 |
| 651 | 2 | 1 | 16 | 3 | 4 | 4 | 4 | 4 |
| 652 | 1 | 1 | 16 | 4 | 4 | 4 | 4 | 4 |
| 653 | 2 | 1 | 16 | 4 | 4 | 4 | 1 | 4 |
| 654 | 2 | 1 | 16 | 3 | 3 | 3 | 3 | 3 |
| 655 | 2 | 1 | 16 | 4 | 4 | 1 | 4 | 4 |
| 656 | 1 | 1 | 16 | 4 | 2 | 3 | 2 | 4 |
| 657 | 1 | 1 | 16 | 4 | 4 | 4 | 4 | 4 |
| 658 | 1 | 1 | 16 | 1 | 1 | 1 | 1 | 4 |
| 659 | 2 | 1 | 16 | 3 | 3 | 4 | 4 | 3 |
| 660 | 1 | 1 | 16 | 1 | 1 | 1 | 1 | 4 |
| 661 | 2 | 1 | 16 | 4 | 4 | 4 | 3 | 4 |
| 662 | 1 | 2 | 17 | 3 | 1 | 3 | 1 | 3 |
| 663 | 1 | 1 | 16 | 4 | 2 | 4 | 1 | 4 |
| 664 | 1 | 2 | 17 | 3 | 1 | 3 | 1 | 3 |
| 665 | 2 | 1 | 16 | 4 | 1 | 2 | 1 | 4 |
| 666 | 1 | 1 | 16 | 3 | 1 | 3 | 2 | 3 |
| 667 | 1 | 1 | 16 | 2 | 2 | 3 | 2 | 3 |
| 668 | 1 | 1 | 16 | 1 | 1 | 3 | 1 | 3 |
| 669 | 2 | 1 | 16 | 3 | 3 | 3 | 3 | 3 |
| 670 | 1 | 1 | 16 | 4 | 4 | 4 | 4 | 4 |
| 671 | 1 | 1 | 16 | 4 | 1 | 4 | 4 | 4 |
| 672 | 1 | 2 | 17 | 2 | 2 | 2 | 2 | 2 |
| 673 | 1 | 2 | 17 | 3 | 3 | 3 | 3 | 3 |
| 674 | 1 | 2 | 17 | 3 | 3 | 3 | 2 | 2 |
| 675 | 1 | 2 | 17 | 3 | 3 | 3 | 2 | 3 |
| 676 | 2 | 2 | 17 | 4 | 3 | 3 | 4 | 3 |
| 677 | 2 | 2 | 17 | 2 | 1 | 4 | 4 | 3 |
| 678 | 2 | 2 | 17 | 3 | 3 | 3 | 3 | 2 |
| 679 | 1 | 3 | 17 | 2 | 3 | 3 | 3 | 3 |
| 680 | 2 | 3 | 17 | 4 | 1 | 4 | 1 | 3 |
| 681 | 1 | 1 | 16 | 3 | 2 | 3 | 3 | 3 |
| 682 | 1 | 2 | 17 | 4 | 1 | 3 | 3 | 4 |
| 683 | 2 | 2 | 17 | 3 | 3 | 3 | 3 | 3 |
| 684 | 1 | 2 | 17 | 3 | 2 | 3 | 1 | 2 |
| 685 | 2 | 3 | 17 | 3 | 3 | 3 | 1 | 2 |
| 686 | 1 | 2 | 17 | 4 | 2 | 3 | 3 | 3 |
| 687 | 1 | 2 | 17 | 3 | 3 | 3 | 3 | 3 |
| 688 | 1 | 2 | 17 | 4 | 4 | 4 | 4 | 3 |
| 689 | 2 | 2 | 17 | 4 | 2 | 4 | 2 | 3 |
| 690 | 2 | 2 | 17 | 4 | 4 | 4 | 2 | 4 |
| 691 | 2 | 2 | 17 | 3 | 2 | 2 | 2 | 2 |
| 692 | 2 | 2 | 17 | 3 | 3 | 4 | 4 | 3 |
| 693 | 1 | 1 | 16 | 1 | 4 | 1 | 1 | 4 |
| 694 | 2 | 2 | 17 | 3 | 4 | 4 | 4 | 3 |
| 695 | 2 | 2 | 17 | 2 | 2 | 2 | 1 | 3 |
| 696 | 2 | 2 | 17 | 3 | 2 | 3 | 3 | 3 |
| 697 | 2 | 2 | 17 | 2 | 4 | 4 | 3 | 2 |
| 698 | 2 | 1 | 16 | 3 | 2 | 4 | 2 | 4 |
| 699 | 1 | 2 | 17 | 2 | 1 | 1 | 1 | 3 |
| 700 | 2 | 2 | 17 | 3 | 3 | 3 | 3 | 3 |
| 701 | 1 | 3 | 17 | 3 | 2 | 2 | 3 | 2 |

|     |   |   |    |   |   |   |   |   |
|-----|---|---|----|---|---|---|---|---|
| 702 | 1 | 2 | 17 | 4 | 4 | 4 | 2 | 4 |
| 703 | 2 | 2 | 17 | 3 | 3 | 3 | 3 | 2 |
| 704 | 2 | 1 | 16 | 3 | 3 | 4 | 3 | 3 |
| 705 | 2 | 3 | 17 | 3 | 3 | 3 | 3 | 3 |
| 706 | 2 | 2 | 17 | 4 | 4 | 1 | 4 | 1 |
| 707 | 1 | 3 | 17 | 3 | 4 | 4 | 4 | 4 |
| 708 | 1 | 2 | 17 | 4 | 4 | 4 | 4 | 4 |
| 709 | 2 | 2 | 17 | 4 | 3 | 2 | 4 | 2 |
| 710 | 1 | 1 | 16 | 3 | 3 | 3 | 2 | 3 |
| 711 | 1 | 2 | 17 | 4 | 2 | 2 | 1 | 4 |
| 712 | 2 | 1 | 16 | 4 | 4 | 4 | 4 | 4 |
| 713 | 2 | 1 | 16 | 4 | 4 | 4 | 4 | 4 |
| 714 | 1 | 3 | 17 | 3 | 2 | 2 | 2 | 3 |
| 715 | 2 | 1 | 16 | 3 | 2 | 3 | 3 | 4 |
| 716 | 1 | 1 | 16 | 4 | 4 | 4 | 1 | 4 |
| 717 | 1 | 1 | 16 | 4 | 3 | 4 | 3 | 4 |
| 718 | 2 | 3 | 17 | 1 | 2 | 3 | 1 | 3 |
| 719 | 2 | 3 | 17 | 3 | 3 | 3 | 3 | 3 |
| 720 | 2 | 2 | 17 | 3 | 3 | 3 | 2 | 3 |
| 721 | 2 | 3 | 17 | 4 | 1 | 3 | 1 | 3 |
| 722 | 1 | 3 | 17 | 4 | 4 | 4 | 4 | 4 |
| 723 | 2 | 3 | 17 | 3 | 3 | 3 | 3 | 3 |
| 724 | 2 | 3 | 17 | 3 | 2 | 2 | 3 | 3 |
| 725 | 1 | 3 | 17 | 3 | 2 | 4 | 2 | 4 |
| 726 | 1 | 3 | 17 | 4 | 4 | 2 | 2 | 3 |
| 727 | 2 | 3 | 17 | 2 | 1 | 4 | 4 | 2 |
| 728 | 1 | 3 | 17 | 4 | 3 | 4 | 2 | 4 |
| 729 | 2 | 2 | 17 | 2 | 4 | 4 | 4 | 3 |
| 730 | 1 | 3 | 17 | 4 | 3 | 4 | 4 | 4 |
| 731 | 2 | 3 | 17 | 4 | 4 | 4 | 3 | 2 |
| 732 | 1 | 3 | 17 | 1 | 1 | 3 | 2 | 4 |
| 733 | 2 | 3 | 17 | 3 | 2 | 3 | 2 | 3 |
| 734 | 2 | 3 | 16 | 3 | 3 | 3 | 3 | 3 |
| 735 | 1 | 2 | 17 | 2 | 2 | 2 | 2 | 2 |
| 736 | 2 | 3 | 17 | 4 | 4 | 2 | 3 | 1 |
| 737 | 1 | 3 | 17 | 3 | 2 | 4 | 2 | 4 |
| 738 | 2 | 2 | 17 | 3 | 1 | 3 | 2 | 3 |
| 739 | 1 | 3 | 17 | 3 | 4 | 4 | 4 | 4 |
| 740 | 2 | 3 | 17 | 3 | 3 | 3 | 3 | 3 |
| 741 | 2 | 3 | 17 | 4 | 2 | 2 | 2 | 2 |
| 742 | 1 | 3 | 17 | 2 | 3 | 2 | 3 | 3 |
| 743 | 2 | 3 | 17 | 3 | 2 | 3 | 2 | 3 |
| 744 | 1 | 3 | 17 | 4 | 4 | 4 | 4 | 4 |
| 745 | 2 | 3 | 17 | 2 | 2 | 3 | 1 | 3 |
| 746 | 2 | 2 | 17 | 3 | 3 | 3 | 3 | 3 |
| 747 | 2 | 3 | 17 | 4 | 2 | 3 | 2 | 3 |
| 748 | 2 | 2 | 17 | 3 | 3 | 3 | 3 | 3 |
| 749 | 1 | 2 | 17 | 3 | 3 | 3 | 3 | 3 |
| 750 | 1 | 3 | 17 | 3 | 3 | 1 | 2 | 3 |
| 751 | 2 | 2 | 17 | 4 | 3 | 4 | 4 | 4 |
| 752 | 2 | 3 | 17 | 4 | 2 | 4 | 1 | 4 |
| 753 | 1 | 2 | 17 | 4 | 1 | 3 | 1 | 3 |
| 754 | 2 | 2 | 17 | 2 | 2 | 3 | 1 | 4 |
| 755 | 2 | 2 | 17 | 3 | 3 | 3 | 2 | 3 |

|     |   |   |    |   |   |   |   |   |
|-----|---|---|----|---|---|---|---|---|
| 756 | 2 | 3 | 17 | 3 | 2 | 3 | 3 | 3 |
| 757 | 1 | 3 | 17 | 4 | 3 | 3 | 2 | 3 |
| 758 | 2 | 3 | 17 | 4 | 2 | 2 | 1 | 3 |
| 759 | 1 | 3 | 17 | 4 | 2 | 3 | 2 | 3 |
| 760 | 2 | 3 | 17 | 3 | 3 | 4 | 4 | 4 |
| 761 | 2 | 2 | 17 | 3 | 2 | 3 | 1 | 3 |
| 762 | 1 | 2 | 17 | 2 | 1 | 1 | 1 | 3 |
| 763 | 1 | 2 | 17 | 4 | 4 | 4 | 4 | 4 |
| 764 | 1 | 2 | 17 | 3 | 2 | 4 | 1 | 2 |
| 765 | 1 | 2 | 17 | 2 | 4 | 3 | 3 | 3 |
| 766 | 1 | 2 | 17 | 2 | 4 | 3 | 3 | 3 |
| 767 | 1 | 2 | 17 | 4 | 4 | 3 | 4 | 4 |
| 768 | 1 | 2 | 17 | 4 | 2 | 2 | 1 | 4 |
| 769 | 1 | 3 | 18 | 3 | 2 | 3 | 2 | 3 |
| 770 | 1 | 2 | 17 | 3 | 4 | 4 | 1 | 1 |
| 771 | 1 | 1 | 16 | 4 | 1 | 1 | 1 | 1 |
| 772 | 1 | 2 | 17 | 1 | 1 | 3 | 1 | 3 |
| 773 | 2 | 2 | 17 | 1 | 3 | 4 | 3 | 3 |
| 774 | 1 | 1 | 16 | 4 | 4 | 4 | 1 | 4 |
| 775 | 2 | 1 | 16 | 4 | 2 | 4 | 3 | 4 |
| 776 | 1 | 2 | 17 | 1 | 2 | 4 | 3 | 3 |
| 777 | 2 | 1 | 16 | 4 | 3 | 4 | 4 | 4 |
| 778 | 1 | 1 | 16 | 1 | 1 | 4 | 1 | 4 |
| 779 | 1 | 1 | 16 | 4 | 3 | 4 | 2 | 3 |
| 780 | 2 | 2 | 17 | 4 | 4 | 4 | 1 | 4 |
| 781 | 2 | 1 | 16 | 4 | 2 | 4 | 2 | 3 |
| 782 | 1 | 1 | 16 | 2 | 1 | 2 | 1 | 2 |
| 783 | 2 | 1 | 16 | 4 | 4 | 4 | 1 | 3 |
| 784 | 1 | 1 | 16 | 4 | 3 | 3 | 3 | 3 |
| 785 | 1 | 1 | 16 | 4 | 1 | 4 | 1 | 4 |
| 786 | 2 | 1 | 16 | 4 | 4 | 2 | 1 | 4 |
| 787 | 1 | 1 | 16 | 4 | 3 | 3 | 1 | 3 |
| 788 | 2 | 1 | 16 | 1 | 2 | 1 | 4 | 2 |
| 789 | 1 | 1 | 16 | 3 | 2 | 3 | 3 | 4 |
| 790 | 1 | 1 | 16 | 4 | 4 | 4 | 4 | 4 |
| 791 | 1 | 1 | 16 | 2 | 1 | 4 | 1 | 2 |
| 792 | 2 | 2 | 17 | 2 | 2 | 3 | 3 | 3 |
| 793 | 2 | 2 | 17 | 4 | 1 | 4 | 2 | 3 |
| 794 | 1 | 1 | 16 | 3 | 1 | 4 | 1 | 3 |
| 795 | 2 | 1 | 16 | 3 | 2 | 2 | 1 | 3 |
| 796 | 2 | 1 | 16 | 3 | 1 | 4 | 1 | 3 |
| 797 | 2 | 1 | 16 | 4 | 2 | 2 | 3 | 1 |
| 798 | 1 | 1 | 16 | 4 | 4 | 4 | 4 | 4 |
| 799 | 2 | 1 | 16 | 2 | 2 | 4 | 2 | 3 |
| 800 | 2 | 1 | 16 | 3 | 2 | 3 | 2 | 3 |
| 801 | 1 | 1 | 16 | 3 | 3 | 4 | 2 | 4 |
| 802 | 2 | 1 | 16 | 3 | 1 | 4 | 3 | 3 |
| 803 | 1 | 1 | 16 | 4 | 4 | 3 | 3 | 4 |
| 804 | 1 | 1 | 16 | 3 | 3 | 2 | 2 | 3 |
| 805 | 2 | 1 | 16 | 3 | 2 | 3 | 1 | 3 |
| 806 | 2 | 2 | 17 | 1 | 1 | 1 | 2 | 4 |
| 807 | 2 | 1 | 16 | 3 | 2 | 3 | 3 | 4 |
| 808 | 2 | 1 | 16 | 3 | 3 | 3 | 3 | 2 |
| 809 | 1 | 1 | 16 | 1 | 3 | 3 | 1 | 3 |

|     |   |   |    |   |   |   |   |   |
|-----|---|---|----|---|---|---|---|---|
| 810 | 2 | 1 | 16 | 2 | 3 | 3 | 4 | 3 |
| 811 | 2 | 1 | 16 | 4 | 2 | 3 | 2 | 4 |
| 812 | 1 | 1 | 16 | 4 | 1 | 4 | 1 | 4 |
| 813 | 2 | 1 | 16 | 3 | 2 | 2 | 2 | 3 |
| 814 | 1 | 2 | 17 | 3 | 3 | 4 | 3 | 4 |
| 815 | 2 | 1 | 16 | 3 | 2 | 2 | 3 | 2 |
| 816 | 1 | 1 | 16 | 3 | 3 | 2 | 1 | 2 |
| 817 | 2 | 1 | 16 | 4 | 3 | 4 | 1 | 4 |
| 818 | 1 | 1 | 16 | 2 | 2 | 3 | 1 | 3 |
| 819 | 2 | 1 | 16 | 4 | 2 | 4 | 3 | 3 |
| 820 | 2 | 1 | 16 | 1 | 1 | 3 | 2 | 4 |
| 821 | 1 | 2 | 17 | 4 | 4 | 4 | 2 | 3 |
| 822 | 1 | 1 | 16 | 4 | 2 | 4 | 1 | 2 |
| 823 | 1 | 1 | 16 | 4 | 1 | 4 | 1 | 4 |
| 824 | 1 | 1 | 16 | 4 | 1 | 4 | 1 | 4 |
| 825 | 1 | 2 | 17 | 2 | 2 | 3 | 1 | 1 |
| 826 | 1 | 2 | 17 | 4 | 3 | 4 | 3 | 3 |
| 827 | 1 | 2 | 17 | 3 | 2 | 2 | 1 | 2 |
| 828 | 1 | 2 | 17 | 3 | 1 | 3 | 1 | 3 |
| 829 | 2 | 3 | 17 | 2 | 1 | 3 | 3 | 3 |
| 830 | 2 | 2 | 17 | 3 | 4 | 4 | 4 | 4 |
| 831 | 2 | 3 | 17 | 3 | 3 | 3 | 4 | 2 |
| 832 | 1 | 3 | 17 | 2 | 1 | 2 | 1 | 3 |
| 833 | 1 | 3 | 17 | 3 | 3 | 3 | 1 | 3 |
| 834 | 2 | 2 | 17 | 4 | 3 | 3 | 3 | 3 |
| 835 | 2 | 2 | 17 | 3 | 2 | 3 | 2 | 3 |
| 836 | 2 | 2 | 17 | 3 | 3 | 3 | 2 | 3 |
| 837 | 2 | 3 | 17 | 4 | 3 | 4 | 1 | 3 |
| 838 | 2 | 2 | 17 | 4 | 1 | 2 | 2 | 2 |
| 839 | 2 | 2 | 17 | 2 | 2 | 3 | 2 | 3 |
| 840 | 2 | 2 | 17 | 4 | 1 | 1 | 1 | 2 |
| 841 | 2 | 2 | 17 | 3 | 2 | 3 | 2 | 3 |
| 842 | 2 | 2 | 17 | 2 | 1 | 4 | 1 | 3 |
| 843 | 1 | 2 | 17 | 3 | 3 | 3 | 2 | 2 |
| 844 | 1 | 2 | 17 | 2 | 3 | 3 | 3 | 3 |
| 845 | 1 | 2 | 17 | 3 | 3 | 3 | 2 | 3 |
| 846 | 1 | 2 | 17 | 4 | 3 | 3 | 3 | 3 |
| 847 | 1 | 2 | 17 | 4 | 4 | 3 | 2 | 3 |
| 848 | 1 | 2 | 17 | 3 | 3 | 2 | 2 | 3 |
| 849 | 1 | 2 | 17 | 4 | 1 | 1 | 1 | 3 |
| 850 | 1 | 2 | 17 | 4 | 3 | 4 | 3 | 4 |
| 851 | 1 | 2 | 17 | 4 | 3 | 4 | 4 | 4 |
| 852 | 2 | 2 | 17 | 3 | 3 | 3 | 3 | 2 |
| 853 | 1 | 2 | 17 | 3 | 3 | 3 | 1 | 4 |
| 854 | 1 | 2 | 17 | 4 | 2 | 2 | 2 | 2 |
| 855 | 1 | 2 | 17 | 3 | 4 | 4 | 4 | 1 |
| 856 | 1 | 1 | 16 | 4 | 3 | 4 | 4 | 4 |
| 857 | 1 | 2 | 17 | 4 | 3 | 3 | 3 | 3 |
| 858 | 1 | 2 | 17 | 2 | 2 | 3 | 3 | 3 |
| 859 | 1 | 2 | 17 | 2 | 1 | 2 | 2 | 4 |
| 860 | 1 | 2 | 17 | 4 | 3 | 4 | 1 | 3 |
| 861 | 1 | 2 | 17 | 2 | 3 | 3 | 3 | 2 |
| 862 | 1 | 2 | 17 | 3 | 2 | 3 | 4 | 4 |
| 863 | 2 | 2 | 17 | 2 | 3 | 3 | 3 | 3 |

|     |   |   |    |   |   |   |   |   |
|-----|---|---|----|---|---|---|---|---|
| 864 | 1 | 2 | 17 | 4 | 1 | 1 | 1 | 4 |
| 865 | 1 | 2 | 17 | 4 | 2 | 3 | 3 | 2 |
| 866 | 1 | 2 | 17 | 3 | 3 | 3 | 2 | 2 |
| 867 | 1 | 2 | 17 | 4 | 3 | 3 | 4 | 4 |
| 868 | 1 | 2 | 17 | 4 | 2 | 2 | 1 | 3 |
| 869 | 2 | 2 | 17 | 2 | 3 | 3 | 3 | 3 |

| A6 | A7 | A8 | A9 | A10 | A11 | A12 | A13 | A14 |  |
|----|----|----|----|-----|-----|-----|-----|-----|--|
| 3  | 3  | 2  | 2  | 3   | 2   | 4   | 3   | 3   |  |
| 1  | 4  | 4  | 4  | 4   | 4   | 4   | 3   | 4   |  |
| 2  | 3  | 1  | 2  | 3   | 3   | 3   | 1   | 4   |  |
| 3  | 2  | 2  | 3  | 4   | 2   | 3   | 2   | 3   |  |
| 4  | 4  | 1  | 1  | 4   | 1   | 4   | 4   | 4   |  |
| 4  | 2  | 2  | 1  | 1   | 1   | 4   | 1   | 3   |  |
| 3  | 2  | 4  | 3  | 2   | 3   | 3   | 1   | 4   |  |
| 1  | 3  | 3  | 1  | 4   | 2   | 4   | 2   | 3   |  |
| 2  | 4  | 3  | 1  | 3   | 1   | 4   | 4   | 4   |  |
| 3  | 3  | 1  | 1  | 4   | 1   | 4   | 4   | 1   |  |
| 3  | 3  | 3  | 4  | 3   | 4   | 4   | 2   | 2   |  |
| 2  | 3  | 3  | 1  | 3   | 1   | 3   | 3   | 4   |  |
| 3  | 4  | 3  | 1  | 4   | 1   | 4   | 4   | 3   |  |
| 4  | 4  | 4  | 4  | 4   | 4   | 4   | 1   | 4   |  |
| 2  | 2  | 3  | 3  | 3   | 3   | 2   | 2   | 3   |  |
| 1  | 4  | 3  | 1  | 4   | 1   | 4   | 4   | 3   |  |
| 3  | 3  | 3  | 1  | 3   | 1   | 3   | 3   | 3   |  |
| 3  | 4  | 4  | 4  | 4   | 4   | 4   | 4   | 4   |  |
| 2  | 3  | 2  | 2  | 4   | 2   | 3   | 3   | 1   |  |
| 1  | 3  | 1  | 4  | 3   | 4   | 3   | 4   | 4   |  |
| 1  | 2  | 1  | 2  | 3   | 2   | 3   | 2   | 3   |  |
| 2  | 2  | 3  | 3  | 3   | 3   | 4   | 3   | 4   |  |
| 1  | 4  | 1  | 1  | 4   | 1   | 4   | 4   | 4   |  |
| 2  | 2  | 2  | 2  | 3   | 2   | 3   | 2   | 3   |  |
| 3  | 2  | 3  | 3  | 2   | 3   | 3   | 3   | 3   |  |
| 4  | 4  | 4  | 2  | 4   | 1   | 3   | 3   | 4   |  |
| 3  | 2  | 4  | 2  | 2   | 2   | 3   | 3   | 3   |  |
| 2  | 2  | 2  | 2  | 3   | 2   | 3   | 2   | 3   |  |
| 1  | 2  | 2  | 1  | 1   | 1   | 3   | 3   | 4   |  |
| 2  | 2  | 3  | 3  | 3   | 3   | 3   | 2   | 3   |  |
| 3  | 3  | 3  | 3  | 4   | 3   | 3   | 2   | 4   |  |
| 4  | 4  | 1  | 1  | 4   | 1   | 4   | 4   | 3   |  |
| 1  | 1  | 2  | 2  | 2   | 1   | 4   | 1   | 4   |  |
| 3  | 3  | 3  | 3  | 3   | 3   | 3   | 3   | 3   |  |
| 2  | 3  | 1  | 2  | 1   | 2   | 3   | 4   | 4   |  |
| 4  | 4  | 4  | 4  | 4   | 4   | 4   | 3   | 3   |  |
| 2  | 4  | 2  | 1  | 4   | 1   | 4   | 4   | 4   |  |
| 4  | 4  | 4  | 4  | 4   | 4   | 4   | 4   | 4   |  |
| 4  | 4  | 2  | 2  | 3   | 3   | 3   | 3   | 3   |  |
| 4  | 4  | 4  | 4  | 4   | 4   | 4   | 4   | 4   |  |
| 1  | 1  | 1  | 1  | 4   | 1   | 4   | 4   | 3   |  |
| 3  | 3  | 3  | 3  | 3   | 2   | 3   | 3   | 3   |  |
| 3  | 3  | 3  | 3  | 3   | 3   | 3   | 3   | 3   |  |
| 3  | 3  | 3  | 3  | 3   | 3   | 3   | 3   | 3   |  |
| 4  | 1  | 1  | 1  | 4   | 1   | 4   | 4   | 4   |  |
| 4  | 4  | 4  | 4  | 4   | 3   | 4   | 4   | 4   |  |
| 2  | 2  | 3  | 3  | 2   | 2   | 2   | 2   | 2   |  |
| 4  | 4  | 4  | 4  | 4   | 4   | 4   | 4   | 4   |  |
| 2  | 2  | 2  | 2  | 2   | 1   | 2   | 2   | 2   |  |
| 3  | 3  | 3  | 3  | 3   | 3   | 3   | 3   | 3   |  |
| 4  | 4  | 4  | 4  | 4   | 4   | 4   | 4   | 4   |  |
| 3  | 4  | 1  | 1  | 4   | 1   | 4   | 3   | 3   |  |
| 3  | 3  | 2  | 2  | 2   | 2   | 3   | 3   | 3   |  |

|   |   |   |   |   |   |   |   |   |
|---|---|---|---|---|---|---|---|---|
| 2 | 3 | 4 | 4 | 3 | 3 | 4 | 3 | 4 |
| 1 | 3 | 2 | 2 | 4 | 3 | 4 | 3 | 1 |
| 4 | 4 | 4 | 4 | 4 | 4 | 4 | 4 | 4 |
| 1 | 1 | 1 | 1 | 1 | 1 | 1 | 1 | 1 |
| 4 | 4 | 4 | 2 | 4 | 2 | 4 | 3 | 4 |
| 1 | 3 | 2 | 1 | 4 | 2 | 4 | 3 | 3 |
| 1 | 3 | 1 | 1 | 3 | 1 | 3 | 2 | 2 |
| 1 | 1 | 1 | 1 | 1 | 1 | 1 | 1 | 1 |
| 2 | 4 | 4 | 4 | 4 | 4 | 3 | 4 | 4 |
| 3 | 4 | 2 | 2 | 4 | 3 | 3 | 2 | 2 |
| 3 | 2 | 2 | 3 | 1 | 3 | 2 | 1 | 2 |
| 4 | 3 | 2 | 2 | 3 | 3 | 4 | 2 | 4 |
| 1 | 4 | 1 | 1 | 4 | 1 | 4 | 4 | 2 |
| 1 | 1 | 1 | 1 | 1 | 1 | 1 | 1 | 1 |
| 1 | 3 | 3 | 1 | 3 | 1 | 3 | 3 | 3 |
| 4 | 3 | 1 | 1 | 4 | 1 | 4 | 4 | 1 |
| 1 | 1 | 1 | 1 | 1 | 1 | 1 | 1 | 1 |
| 3 | 3 | 3 | 1 | 1 | 1 | 4 | 4 | 1 |
| 2 | 4 | 1 | 2 | 3 | 1 | 4 | 4 | 3 |
| 1 | 3 | 2 | 2 | 3 | 2 | 3 | 3 | 3 |
| 3 | 3 | 2 | 2 | 3 | 2 | 3 | 3 | 4 |
| 2 | 3 | 4 | 1 | 3 | 3 | 4 | 3 | 3 |
| 3 | 2 | 3 | 2 | 2 | 2 | 3 | 3 | 3 |
| 4 | 4 | 4 | 4 | 4 | 4 | 3 | 2 | 4 |
| 1 | 1 | 2 | 3 | 2 | 2 | 1 | 2 | 1 |
| 1 | 3 | 1 | 1 | 3 | 2 | 2 | 3 | 2 |
| 1 | 3 | 2 | 1 | 3 | 1 | 3 | 4 | 3 |
| 4 | 3 | 3 | 3 | 3 | 2 | 2 | 2 | 3 |
| 1 | 1 | 1 | 3 | 2 | 2 | 3 | 2 | 1 |
| 1 | 1 | 1 | 1 | 1 | 1 | 1 | 1 | 1 |
| 2 | 3 | 4 | 3 | 3 | 3 | 2 | 2 | 3 |
| 2 | 1 | 4 | 4 | 3 | 4 | 2 | 4 | 1 |
| 2 | 2 | 2 | 2 | 2 | 1 | 3 | 3 | 3 |
| 1 | 1 | 1 | 1 | 2 | 1 | 1 | 2 | 4 |
| 1 | 4 | 3 | 3 | 3 | 3 | 2 | 3 | 2 |
| 1 | 1 | 1 | 1 | 4 | 1 | 4 | 4 | 1 |
| 2 | 3 | 1 | 1 | 4 | 1 | 4 | 1 | 3 |
| 2 | 2 | 3 | 1 | 2 | 1 | 3 | 3 | 4 |
| 3 | 4 | 4 | 4 | 4 | 2 | 4 | 4 | 2 |
| 2 | 3 | 2 | 1 | 4 | 3 | 3 | 4 | 4 |
| 3 | 3 | 2 | 3 | 2 | 3 | 3 | 2 | 3 |
| 3 | 3 | 2 | 2 | 3 | 3 | 3 | 3 | 3 |
| 1 | 4 | 4 | 4 | 1 | 4 | 1 | 1 | 4 |
| 1 | 2 | 1 | 1 | 3 | 1 | 4 | 4 | 2 |
| 3 | 4 | 4 | 2 | 4 | 1 | 2 | 3 | 4 |
| 2 | 2 | 3 | 3 | 2 | 3 | 3 | 3 | 2 |
| 3 | 3 | 2 | 3 | 3 | 2 | 2 | 3 | 2 |
| 1 | 3 | 1 | 1 | 4 | 1 | 4 | 3 | 2 |
| 1 | 1 | 1 | 1 | 4 | 1 | 4 | 4 | 4 |
| 1 | 1 | 2 | 2 | 2 | 1 | 4 | 2 | 3 |
| 1 | 3 | 2 | 2 | 2 | 3 | 2 | 2 | 2 |
| 4 | 4 | 4 | 4 | 4 | 4 | 4 | 4 | 4 |
| 1 | 2 | 1 | 1 | 1 | 1 | 1 | 1 | 1 |
| 3 | 3 | 1 | 2 | 3 | 3 | 2 | 2 | 3 |

|   |   |   |   |   |   |   |   |   |
|---|---|---|---|---|---|---|---|---|
| 2 | 3 | 3 | 3 | 3 | 3 | 3 | 3 | 4 |
| 2 | 2 | 4 | 3 | 2 | 3 | 2 | 2 | 4 |
| 1 | 1 | 4 | 1 | 4 | 2 | 4 | 4 | 4 |
| 4 | 4 | 4 | 4 | 4 | 4 | 4 | 4 | 4 |
| 2 | 3 | 3 | 2 | 3 | 2 | 3 | 3 | 3 |
| 2 | 3 | 3 | 1 | 4 | 1 | 4 | 2 | 3 |
| 1 | 1 | 4 | 2 | 3 | 3 | 3 | 4 | 2 |
| 1 | 4 | 1 | 1 | 4 | 1 | 4 | 4 | 1 |
| 1 | 3 | 1 | 1 | 4 | 1 | 4 | 3 | 3 |
| 4 | 4 | 4 | 4 | 1 | 4 | 1 | 1 | 2 |
| 2 | 3 | 2 | 4 | 2 | 4 | 2 | 2 | 4 |
| 2 | 3 | 2 | 1 | 3 | 2 | 3 | 3 | 3 |
| 4 | 3 | 3 | 2 | 4 | 4 | 4 | 4 | 3 |
| 4 | 3 | 3 | 4 | 4 | 3 | 3 | 2 | 4 |
| 3 | 3 | 3 | 3 | 4 | 2 | 4 | 3 | 3 |
| 1 | 2 | 2 | 3 | 3 | 3 | 3 | 4 | 3 |
| 2 | 3 | 2 | 2 | 4 | 3 | 3 | 2 | 3 |
| 1 | 1 | 1 | 1 | 4 | 1 | 4 | 4 | 4 |
| 2 | 1 | 2 | 2 | 3 | 1 | 4 | 3 | 3 |
| 4 | 4 | 4 | 4 | 4 | 4 | 4 | 4 | 4 |
| 3 | 3 | 2 | 2 | 3 | 2 | 3 | 3 | 2 |
| 4 | 4 | 4 | 4 | 4 | 4 | 4 | 4 | 4 |
| 4 | 4 | 4 | 4 | 4 | 4 | 4 | 3 | 4 |
| 1 | 2 | 1 | 1 | 4 | 3 | 3 | 1 | 1 |
| 3 | 1 | 1 | 2 | 2 | 2 | 2 | 2 | 3 |
| 3 | 1 | 1 | 3 | 1 | 3 | 1 | 1 | 1 |
| 3 | 2 | 2 | 2 | 2 | 2 | 2 | 3 | 3 |
| 1 | 2 | 2 | 2 | 4 | 2 | 3 | 1 | 3 |
| 2 | 2 | 1 | 2 | 2 | 3 | 3 | 3 | 2 |
| 1 | 4 | 1 | 1 | 4 | 1 | 4 | 1 | 4 |
| 4 | 4 | 2 | 1 | 4 | 4 | 4 | 4 | 4 |
| 2 | 1 | 3 | 1 | 1 | 1 | 3 | 3 | 4 |
| 3 | 3 | 3 | 3 | 3 | 3 | 3 | 3 | 3 |
| 1 | 3 | 2 | 2 | 4 | 4 | 2 | 1 | 3 |
| 2 | 4 | 1 | 1 | 4 | 1 | 4 | 4 | 1 |
| 3 | 2 | 1 | 3 | 1 | 2 | 4 | 4 | 2 |
| 1 | 1 | 1 | 1 | 1 | 1 | 1 | 1 | 1 |
| 1 | 1 | 1 | 1 | 1 | 1 | 1 | 2 | 1 |
| 1 | 1 | 1 | 1 | 4 | 1 | 4 | 4 | 4 |
| 1 | 1 | 2 | 2 | 2 | 2 | 2 | 2 | 2 |
| 3 | 4 | 3 | 3 | 4 | 3 | 4 | 4 | 3 |
| 1 | 2 | 3 | 4 | 1 | 3 | 4 | 3 | 2 |
| 2 | 1 | 1 | 2 | 3 | 3 | 3 | 3 | 4 |
| 3 | 3 | 3 | 2 | 2 | 3 | 2 | 2 | 3 |
| 1 | 1 | 1 | 1 | 4 | 1 | 4 | 4 | 1 |
| 2 | 4 | 4 | 1 | 4 | 2 | 4 | 3 | 2 |
| 1 | 3 | 4 | 4 | 1 | 4 | 3 | 1 | 4 |
| 3 | 1 | 4 | 3 | 3 | 2 | 3 | 2 | 4 |
| 2 | 3 | 4 | 2 | 4 | 2 | 4 | 4 | 3 |
| 4 | 4 | 4 | 4 | 3 | 2 | 3 | 2 | 4 |
| 1 | 1 | 1 | 1 | 4 | 1 | 4 | 4 | 3 |
| 1 | 3 | 4 | 3 | 4 | 4 | 4 | 4 | 4 |
| 1 | 1 | 3 | 4 | 3 | 2 | 4 | 3 | 3 |
| 2 | 3 | 1 | 1 | 4 | 1 | 4 | 3 | 2 |



|   |   |   |   |   |   |   |   |   |
|---|---|---|---|---|---|---|---|---|
| 1 | 3 | 1 | 2 | 4 | 2 | 4 | 3 | 2 |
| 3 | 2 | 2 | 3 | 2 | 3 | 3 | 3 | 3 |
| 4 | 3 | 4 | 3 | 4 | 4 | 4 | 4 | 4 |
| 3 | 3 | 3 | 3 | 3 | 3 | 3 | 3 | 3 |
| 1 | 1 | 1 | 1 | 1 | 1 | 4 | 3 | 4 |
| 3 | 2 | 1 | 1 | 1 | 1 | 4 | 4 | 2 |
| 2 | 3 | 2 | 2 | 4 | 1 | 2 | 3 | 2 |
| 3 | 3 | 2 | 1 | 3 | 1 | 4 | 3 | 3 |
| 4 | 2 | 4 | 4 | 2 | 4 | 2 | 1 | 4 |
| 4 | 4 | 4 | 2 | 1 | 1 | 2 | 1 | 4 |
| 4 | 4 | 2 | 1 | 4 | 2 | 4 | 3 | 4 |
| 2 | 1 | 2 | 2 | 1 | 3 | 3 | 4 | 3 |
| 2 | 2 | 2 | 2 | 3 | 2 | 3 | 3 | 2 |
| 3 | 4 | 1 | 1 | 2 | 1 | 4 | 4 | 3 |
| 2 | 3 | 2 | 2 | 2 | 2 | 3 | 3 | 3 |
| 1 | 3 | 3 | 1 | 4 | 1 | 4 | 2 | 4 |
| 1 | 2 | 2 | 1 | 3 | 1 | 1 | 2 | 3 |
| 2 | 1 | 3 | 2 | 1 | 2 | 3 | 3 | 3 |
| 4 | 4 | 4 | 4 | 4 | 4 | 4 | 4 | 4 |
| 4 | 3 | 2 | 2 | 3 | 1 | 4 | 2 | 1 |
| 2 | 4 | 1 | 1 | 4 | 1 | 4 | 4 | 1 |
| 3 | 3 | 2 | 2 | 4 | 1 | 4 | 3 | 4 |
| 2 | 2 | 3 | 4 | 3 | 4 | 3 | 2 | 3 |
| 1 | 4 | 1 | 1 | 3 | 2 | 4 | 2 | 2 |
| 1 | 1 | 1 | 1 | 1 | 4 | 3 | 1 | 3 |
| 2 | 2 | 2 | 2 | 4 | 2 | 3 | 2 | 2 |
| 2 | 2 | 3 | 3 | 3 | 3 | 4 | 3 | 4 |
| 4 | 4 | 4 | 4 | 3 | 4 | 4 | 4 | 4 |
| 3 | 1 | 2 | 3 | 2 | 2 | 2 | 1 | 4 |
| 2 | 4 | 4 | 3 | 3 | 1 | 4 | 2 | 3 |
| 1 | 3 | 1 | 2 | 3 | 1 | 3 | 2 | 3 |
| 1 | 4 | 1 | 1 | 4 | 1 | 4 | 3 | 3 |
| 2 | 3 | 2 | 1 | 3 | 1 | 4 | 4 | 1 |
| 4 | 4 | 2 | 3 | 4 | 4 | 1 | 2 | 4 |
| 3 | 4 | 2 | 2 | 4 | 2 | 2 | 4 | 3 |
| 2 | 2 | 3 | 2 | 3 | 2 | 3 | 2 | 3 |
| 1 | 1 | 2 | 1 | 1 | 1 | 4 | 4 | 2 |
| 3 | 4 | 3 | 2 | 1 | 2 | 3 | 2 | 3 |
| 2 | 3 | 3 | 2 | 3 | 1 | 1 | 3 | 3 |
| 3 | 4 | 4 | 3 | 4 | 3 | 4 | 4 | 3 |
| 4 | 4 | 4 | 4 | 4 | 4 | 4 | 4 | 4 |
| 3 | 3 | 3 | 3 | 3 | 3 | 3 | 3 | 3 |
| 4 | 3 | 1 | 3 | 4 | 3 | 4 | 4 | 4 |
| 2 | 2 | 2 | 1 | 3 | 1 | 3 | 2 | 3 |
| 1 | 3 | 3 | 3 | 3 | 3 | 3 | 2 | 3 |
| 2 | 3 | 3 | 3 | 3 | 2 | 3 | 3 | 3 |
| 4 | 4 | 4 | 4 | 4 | 4 | 4 | 4 | 4 |
| 1 | 1 | 1 | 1 | 1 | 1 | 4 | 4 | 4 |
| 3 | 4 | 1 | 4 | 4 | 3 | 3 | 4 | 3 |
| 4 | 4 | 2 | 1 | 4 | 1 | 4 | 2 | 2 |
| 4 | 4 | 3 | 4 | 4 | 1 | 4 | 4 | 3 |
| 2 | 2 | 3 | 1 | 3 | 1 | 3 | 3 | 3 |
| 4 | 4 | 4 | 1 | 4 | 1 | 4 | 4 | 4 |
| 1 | 4 | 2 | 2 | 3 | 2 | 4 | 1 | 3 |

|   |   |   |   |   |   |   |   |   |
|---|---|---|---|---|---|---|---|---|
| 4 | 4 | 3 | 2 | 4 | 2 | 4 | 3 | 3 |
| 3 | 4 | 3 | 3 | 4 | 4 | 4 | 4 | 4 |
| 4 | 4 | 4 | 4 | 4 | 4 | 4 | 4 | 1 |
| 3 | 2 | 3 | 2 | 2 | 2 | 3 | 2 | 3 |
| 2 | 1 | 4 | 3 | 4 | 2 | 4 | 4 | 3 |
| 4 | 4 | 4 | 4 | 4 | 4 | 4 | 4 | 4 |
| 4 | 4 | 4 | 4 | 4 | 4 | 4 | 4 | 4 |
| 4 | 3 | 1 | 3 | 4 | 3 | 3 | 3 | 3 |
| 1 | 1 | 2 | 1 | 2 | 1 | 4 | 2 | 3 |
| 2 | 2 | 3 | 3 | 3 | 3 | 3 | 2 | 3 |
| 1 | 4 | 2 | 3 | 4 | 1 | 4 | 4 | 4 |
| 4 | 4 | 4 | 4 | 4 | 3 | 4 | 4 | 4 |
| 4 | 3 | 1 | 3 | 4 | 3 | 3 | 3 | 3 |
| 3 | 3 | 2 | 1 | 3 | 1 | 3 | 2 | 2 |
| 1 | 4 | 1 | 4 | 4 | 1 | 4 | 3 | 3 |
| 4 | 4 | 4 | 3 | 4 | 2 | 4 | 3 | 3 |
| 3 | 3 | 3 | 3 | 3 | 3 | 3 | 3 | 3 |
| 3 | 3 | 3 | 3 | 3 | 3 | 3 | 3 | 3 |
| 2 | 4 | 4 | 3 | 3 | 3 | 3 | 3 | 4 |
| 3 | 3 | 3 | 3 | 3 | 3 | 3 | 2 | 4 |
| 4 | 4 | 4 | 3 | 2 | 2 | 3 | 4 | 4 |
| 4 | 3 | 1 | 4 | 2 | 4 | 3 | 2 | 4 |
| 1 | 1 | 2 | 1 | 4 | 1 | 4 | 1 | 3 |
| 1 | 1 | 1 | 1 | 1 | 1 | 1 | 4 | 1 |
| 3 | 2 | 3 | 2 | 3 | 1 | 4 | 4 | 3 |
| 4 | 2 | 4 | 2 | 3 | 2 | 3 | 4 | 4 |
| 2 | 2 | 2 | 2 | 2 | 2 | 2 | 2 | 2 |
| 2 | 4 | 1 | 2 | 4 | 4 | 4 | 4 | 2 |
| 4 | 4 | 4 | 4 | 4 | 4 | 4 | 4 | 4 |
| 2 | 1 | 2 | 1 | 3 | 1 | 4 | 3 | 4 |
| 2 | 2 | 3 | 2 | 2 | 2 | 2 | 2 | 2 |
| 1 | 1 | 4 | 3 | 1 | 4 | 4 | 1 | 4 |
| 3 | 2 | 3 | 3 | 3 | 3 | 3 | 3 | 3 |
| 4 | 4 | 4 | 4 | 4 | 4 | 4 | 4 | 2 |
| 1 | 3 | 3 | 1 | 4 | 1 | 3 | 2 | 4 |
| 2 | 3 | 3 | 2 | 3 | 2 | 3 | 4 | 3 |
| 1 | 2 | 3 | 1 | 3 | 1 | 4 | 2 | 2 |
| 4 | 4 | 1 | 1 | 4 | 1 | 3 | 4 | 4 |
| 4 | 4 | 4 | 4 | 4 | 4 | 4 | 4 | 4 |
| 1 | 4 | 2 | 4 | 4 | 1 | 3 | 2 | 3 |
| 4 | 4 | 3 | 4 | 4 | 4 | 4 | 4 | 4 |
| 2 | 3 | 3 | 3 | 4 | 2 | 2 | 2 | 1 |
| 4 | 3 | 4 | 4 | 2 | 2 | 3 | 2 | 4 |
| 4 | 4 | 4 | 4 | 4 | 1 | 4 | 4 | 1 |
| 4 | 3 | 3 | 4 | 1 | 4 | 2 | 1 | 4 |
| 1 | 2 | 1 | 2 | 4 | 2 | 3 | 3 | 3 |
| 2 | 3 | 2 | 4 | 3 | 2 | 3 | 2 | 2 |
| 2 | 2 | 3 | 1 | 2 | 1 | 3 | 2 | 4 |
| 4 | 4 | 4 | 3 | 4 | 4 | 4 | 4 | 4 |
| 2 | 2 | 3 | 3 | 3 | 2 | 3 | 3 | 2 |
| 2 | 2 | 3 | 3 | 3 | 2 | 3 | 3 | 2 |
| 4 | 3 | 1 | 1 | 4 | 1 | 4 | 4 | 1 |
| 2 | 4 | 3 | 1 | 3 | 1 | 3 | 3 | 3 |
| 2 | 2 | 2 | 3 | 2 | 2 | 3 | 2 | 3 |

|   |   |   |   |   |   |   |   |   |
|---|---|---|---|---|---|---|---|---|
| 1 | 4 | 3 | 3 | 4 | 2 | 4 | 2 | 3 |
| 2 | 2 | 2 | 2 | 3 | 2 | 3 | 2 | 2 |
| 3 | 4 | 1 | 1 | 4 | 1 | 4 | 4 | 4 |
| 4 | 4 | 3 | 2 | 3 | 3 | 3 | 2 | 3 |
| 3 | 3 | 2 | 4 | 4 | 4 | 4 | 4 | 4 |
| 2 | 2 | 2 | 2 | 2 | 2 | 3 | 3 | 3 |
| 3 | 3 | 3 | 3 | 3 | 3 | 3 | 3 | 3 |
| 2 | 4 | 2 | 2 | 2 | 2 | 2 | 4 | 2 |
| 1 | 1 | 2 | 4 | 3 | 2 | 3 | 1 | 4 |
| 2 | 3 | 3 | 2 | 2 | 2 | 3 | 3 | 2 |
| 2 | 2 | 3 | 1 | 3 | 1 | 4 | 4 | 4 |
| 4 | 4 | 4 | 3 | 4 | 4 | 4 | 4 | 4 |
| 2 | 3 | 3 | 4 | 4 | 4 | 4 | 4 | 4 |
| 1 | 1 | 2 | 1 | 2 | 1 | 2 | 2 | 3 |
| 4 | 3 | 2 | 1 | 3 | 1 | 4 | 4 | 3 |
| 3 | 3 | 3 | 3 | 3 | 3 | 3 | 3 | 3 |
| 4 | 4 | 3 | 3 | 4 | 4 | 3 | 4 | 3 |
| 1 | 1 | 1 | 1 | 1 | 1 | 4 | 1 | 2 |
| 1 | 1 | 1 | 1 | 1 | 1 | 4 | 4 | 3 |
| 2 | 3 | 3 | 4 | 3 | 4 | 3 | 2 | 3 |
| 4 | 4 | 3 | 4 | 4 | 2 | 4 | 3 | 3 |
| 1 | 2 | 4 | 3 | 3 | 3 | 3 | 1 | 3 |
| 1 | 1 | 1 | 2 | 3 | 3 | 4 | 4 | 3 |
| 4 | 2 | 3 | 3 | 3 | 3 | 3 | 3 | 3 |
| 3 | 3 | 3 | 3 | 3 | 3 | 3 | 3 | 3 |
| 2 | 4 | 2 | 1 | 4 | 1 | 4 | 4 | 3 |
| 4 | 2 | 2 | 2 | 3 | 3 | 2 | 2 | 2 |
| 2 | 3 | 2 | 3 | 2 | 3 | 2 | 2 | 2 |
| 3 | 4 | 4 | 1 | 4 | 1 | 4 | 3 | 2 |
| 1 | 3 | 2 | 1 | 4 | 2 | 4 | 3 | 3 |
| 3 | 1 | 2 | 1 | 1 | 4 | 1 | 1 | 3 |
| 1 | 2 | 1 | 1 | 2 | 1 | 4 | 3 | 3 |
| 1 | 1 | 3 | 1 | 1 | 1 | 1 | 1 | 1 |
| 2 | 4 | 4 | 3 | 3 | 3 | 3 | 3 | 4 |
| 3 | 3 | 2 | 2 | 3 | 2 | 3 | 2 | 3 |
| 1 | 4 | 3 | 1 | 4 | 3 | 3 | 3 | 3 |
| 4 | 4 | 4 | 1 | 4 | 2 | 4 | 4 | 4 |
| 2 | 3 | 2 | 1 | 4 | 1 | 3 | 4 | 3 |
| 2 | 3 | 2 | 2 | 3 | 3 | 3 | 3 | 3 |
| 3 | 4 | 3 | 3 | 3 | 3 | 3 | 3 | 3 |
| 2 | 2 | 3 | 3 | 3 | 2 | 2 | 2 | 4 |
| 2 | 4 | 3 | 1 | 4 | 3 | 3 | 4 | 2 |
| 1 | 3 | 2 | 1 | 3 | 1 | 4 | 4 | 3 |
| 3 | 3 | 3 | 3 | 3 | 3 | 3 | 3 | 3 |
| 3 | 3 | 3 | 2 | 4 | 3 | 3 | 3 | 3 |
| 2 | 2 | 3 | 2 | 2 | 3 | 2 | 2 | 3 |
| 1 | 3 | 3 | 2 | 2 | 2 | 3 | 3 | 2 |
| 2 | 3 | 1 | 1 | 1 | 1 | 3 | 1 | 1 |
| 1 | 2 | 2 | 1 | 3 | 2 | 3 | 2 | 2 |
| 1 | 3 | 3 | 3 | 2 | 3 | 3 | 2 | 3 |
| 2 | 2 | 3 | 1 | 4 | 2 | 2 | 2 | 3 |
| 1 | 1 | 1 | 1 | 4 | 1 | 4 | 4 | 2 |
| 1 | 2 | 2 | 2 | 3 | 2 | 4 | 2 | 3 |
| 2 | 2 | 4 | 4 | 2 | 2 | 2 | 2 | 4 |

|   |   |   |   |   |   |   |   |   |
|---|---|---|---|---|---|---|---|---|
| 2 | 3 | 3 | 2 | 4 | 1 | 4 | 4 | 4 |
| 2 | 2 | 3 | 2 | 2 | 1 | 3 | 2 | 1 |
| 1 | 3 | 1 | 4 | 3 | 4 | 3 | 4 | 4 |
| 4 | 4 | 4 | 4 | 4 | 4 | 4 | 3 | 4 |
| 4 | 4 | 4 | 4 | 4 | 4 | 4 | 4 | 4 |
| 3 | 3 | 2 | 3 | 3 | 3 | 3 | 3 | 3 |
| 2 | 3 | 3 | 1 | 3 | 1 | 3 | 4 | 3 |
| 4 | 2 | 4 | 2 | 2 | 3 | 2 | 3 | 3 |
| 2 | 2 | 2 | 2 | 3 | 2 | 3 | 2 | 3 |
| 4 | 4 | 4 | 4 | 4 | 4 | 4 | 4 | 4 |
| 2 | 4 | 2 | 1 | 3 | 1 | 4 | 4 | 3 |
| 2 | 2 | 2 | 2 | 3 | 2 | 3 | 2 | 2 |
| 4 | 4 | 1 | 1 | 3 | 2 | 3 | 3 | 3 |
| 2 | 3 | 3 | 2 | 3 | 2 | 3 | 3 | 3 |
| 2 | 2 | 3 | 2 | 2 | 2 | 4 | 3 | 3 |
| 4 | 4 | 4 | 4 | 4 | 4 | 4 | 4 | 4 |
| 4 | 4 | 4 | 4 | 4 | 4 | 4 | 4 | 4 |
| 3 | 1 | 1 | 1 | 3 | 2 | 4 | 3 | 3 |
| 2 | 3 | 3 | 3 | 3 | 3 | 3 | 2 | 3 |
| 3 | 3 | 2 | 2 | 2 | 3 | 2 | 2 | 3 |
| 2 | 3 | 3 | 1 | 2 | 1 | 4 | 3 | 3 |
| 3 | 4 | 2 | 3 | 4 | 3 | 2 | 3 | 4 |
| 2 | 3 | 2 | 1 | 4 | 1 | 4 | 4 | 3 |
| 1 | 2 | 1 | 1 | 3 | 2 | 3 | 3 | 4 |
| 2 | 1 | 2 | 1 | 3 | 1 | 3 | 2 | 4 |
| 4 | 4 | 1 | 1 | 4 | 1 | 4 | 4 | 3 |
| 3 | 3 | 3 | 3 | 3 | 3 | 3 | 3 | 3 |
| 4 | 4 | 3 | 1 | 3 | 1 | 3 | 3 | 4 |
| 1 | 1 | 2 | 3 | 2 | 3 | 3 | 2 | 3 |
| 3 | 2 | 2 | 2 | 3 | 2 | 3 | 2 | 3 |
| 2 | 2 | 1 | 1 | 4 | 3 | 3 | 1 | 4 |
| 2 | 2 | 3 | 2 | 2 | 2 | 2 | 2 | 2 |
| 3 | 3 | 3 | 3 | 3 | 2 | 3 | 3 | 3 |
| 3 | 3 | 4 | 3 | 1 | 4 | 3 | 2 | 4 |
| 3 | 2 | 2 | 1 | 1 | 1 | 4 | 3 | 3 |
| 1 | 1 | 3 | 3 | 3 | 1 | 2 | 2 | 2 |
| 3 | 2 | 4 | 4 | 2 | 4 | 3 | 4 | 4 |
| 3 | 2 | 3 | 3 | 3 | 3 | 3 | 1 | 4 |
| 2 | 2 | 2 | 2 | 3 | 2 | 3 | 2 | 2 |
| 4 | 4 | 4 | 4 | 1 | 4 | 1 | 1 | 4 |
| 2 | 4 | 1 | 1 | 4 | 2 | 4 | 2 | 3 |
| 4 | 4 | 2 | 2 | 4 | 4 | 4 | 4 | 4 |
| 2 | 3 | 4 | 4 | 3 | 3 | 2 | 2 | 3 |
| 2 | 2 | 2 | 1 | 3 | 1 | 4 | 3 | 3 |
| 2 | 4 | 3 | 4 | 2 | 4 | 2 | 1 | 4 |
| 3 | 3 | 3 | 2 | 2 | 2 | 4 | 4 | 3 |
| 4 | 4 | 4 | 1 | 4 | 1 | 3 | 1 | 4 |
| 3 | 3 | 3 | 3 | 3 | 3 | 3 | 3 | 3 |
| 3 | 3 | 2 | 1 | 3 | 1 | 3 | 2 | 2 |
| 3 | 3 | 3 | 3 | 3 | 3 | 3 | 3 | 3 |
| 4 | 1 | 1 | 1 | 4 | 1 | 4 | 4 | 4 |
| 1 | 3 | 3 | 3 | 2 | 3 | 3 | 3 | 3 |
| 3 | 3 | 3 | 2 | 2 | 3 | 3 | 2 | 3 |
| 2 | 3 | 2 | 2 | 2 | 2 | 3 | 3 | 3 |

|   |   |   |   |   |   |   |   |   |
|---|---|---|---|---|---|---|---|---|
| 3 | 2 | 2 | 2 | 3 | 2 | 3 | 3 | 1 |
| 4 | 4 | 4 | 4 | 4 | 1 | 4 | 4 | 2 |
| 3 | 4 | 3 | 3 | 3 | 3 | 3 | 3 | 3 |
| 2 | 3 | 1 | 3 | 3 | 2 | 2 | 2 | 3 |
| 2 | 2 | 2 | 2 | 3 | 2 | 3 | 2 | 3 |
| 1 | 1 | 1 | 1 | 4 | 1 | 4 | 1 | 4 |
| 2 | 1 | 1 | 1 | 1 | 1 | 4 | 3 | 3 |
| 3 | 2 | 3 | 1 | 4 | 2 | 2 | 2 | 4 |
| 3 | 3 | 1 | 1 | 4 | 1 | 4 | 3 | 1 |
| 1 | 3 | 3 | 1 | 3 | 1 | 3 | 2 | 4 |
| 2 | 3 | 2 | 2 | 3 | 2 | 3 | 2 | 3 |
| 3 | 2 | 3 | 4 | 3 | 4 | 2 | 3 | 4 |
| 2 | 3 | 3 | 2 | 3 | 2 | 3 | 1 | 2 |
| 2 | 3 | 2 | 2 | 3 | 2 | 4 | 2 | 3 |
| 2 | 2 | 2 | 1 | 4 | 1 | 3 | 3 | 1 |
| 4 | 4 | 4 | 3 | 4 | 4 | 4 | 4 | 4 |
| 2 | 3 | 1 | 1 | 2 | 1 | 4 | 2 | 3 |
| 4 | 4 | 3 | 3 | 3 | 3 | 2 | 2 | 2 |
| 1 | 4 | 4 | 4 | 4 | 1 | 4 | 4 | 4 |
| 4 | 4 | 4 | 4 | 4 | 4 | 4 | 4 | 4 |
| 4 | 3 | 2 | 3 | 2 | 2 | 2 | 2 | 2 |
| 1 | 2 | 3 | 1 | 4 | 1 | 4 | 2 | 2 |
| 3 | 3 | 3 | 3 | 2 | 3 | 3 | 2 | 3 |
| 2 | 2 | 2 | 1 | 3 | 2 | 4 | 4 | 2 |
| 1 | 1 | 1 | 2 | 1 | 2 | 2 | 2 | 4 |
| 2 | 2 | 2 | 2 | 2 | 1 | 2 | 2 | 2 |
| 2 | 3 | 1 | 3 | 4 | 1 | 3 | 3 | 3 |
| 4 | 4 | 4 | 3 | 4 | 4 | 2 | 4 | 4 |
| 1 | 2 | 1 | 2 | 1 | 1 | 4 | 4 | 2 |
| 4 | 4 | 4 | 4 | 4 | 4 | 4 | 2 | 4 |
| 3 | 2 | 1 | 1 | 4 | 1 | 3 | 4 | 3 |
| 3 | 3 | 3 | 2 | 3 | 2 | 3 | 3 | 2 |
| 3 | 2 | 3 | 2 | 3 | 2 | 3 | 3 | 3 |
| 1 | 1 | 3 | 1 | 1 | 2 | 3 | 1 | 3 |
| 2 | 3 | 1 | 2 | 3 | 2 | 2 | 2 | 3 |
| 1 | 1 | 1 | 1 | 4 | 2 | 3 | 1 | 4 |
| 4 | 4 | 4 | 4 | 4 | 4 | 3 | 3 | 4 |
| 2 | 1 | 2 | 3 | 2 | 3 | 3 | 2 | 3 |
| 1 | 1 | 2 | 1 | 4 | 1 | 4 | 1 | 4 |
| 3 | 4 | 4 | 3 | 4 | 3 | 3 | 3 | 4 |
| 4 | 2 | 4 | 1 | 4 | 1 | 4 | 4 | 3 |
| 2 | 4 | 3 | 2 | 4 | 2 | 2 | 3 | 2 |
| 1 | 1 | 1 | 3 | 2 | 3 | 4 | 3 | 4 |
| 3 | 3 | 2 | 2 | 2 | 2 | 3 | 3 | 3 |
| 3 | 3 | 3 | 3 | 3 | 3 | 3 | 3 | 3 |
| 2 | 3 | 3 | 2 | 4 | 2 | 3 | 4 | 4 |
| 1 | 2 | 1 | 1 | 3 | 1 | 3 | 3 | 1 |
| 2 | 3 | 3 | 4 | 3 | 2 | 4 | 4 | 4 |
| 4 | 4 | 4 | 4 | 4 | 4 | 4 | 4 | 4 |
| 2 | 3 | 1 | 2 | 3 | 2 | 3 | 3 | 4 |
| 2 | 2 | 3 | 2 | 3 | 3 | 3 | 3 | 4 |
| 4 | 4 | 1 | 2 | 3 | 1 | 4 | 4 | 4 |
| 1 | 3 | 1 | 1 | 4 | 3 | 3 | 1 | 3 |
| 3 | 4 | 1 | 1 | 3 | 1 | 4 | 3 | 2 |

|   |   |   |   |   |   |   |   |   |
|---|---|---|---|---|---|---|---|---|
| 3 | 4 | 1 | 1 | 4 | 2 | 3 | 4 | 1 |
| 1 | 4 | 1 | 3 | 4 | 4 | 3 | 1 | 1 |
| 4 | 4 | 4 | 4 | 4 | 4 | 4 | 4 | 4 |
| 2 | 1 | 2 | 2 | 1 | 3 | 4 | 2 | 3 |
| 1 | 1 | 4 | 3 | 1 | 2 | 3 | 1 | 4 |
| 1 | 2 | 1 | 1 | 3 | 1 | 3 | 2 | 1 |
| 2 | 3 | 2 | 1 | 4 | 1 | 3 | 4 | 1 |
| 4 | 4 | 1 | 2 | 3 | 1 | 4 | 4 | 4 |
| 4 | 4 | 1 | 1 | 4 | 1 | 4 | 4 | 2 |
| 4 | 4 | 4 | 4 | 4 | 4 | 4 | 4 | 4 |
| 2 | 3 | 3 | 2 | 4 | 1 | 4 | 2 | 4 |
| 3 | 2 | 1 | 1 | 4 | 2 | 3 | 3 | 1 |
| 2 | 2 | 1 | 2 | 2 | 2 | 4 | 4 | 1 |
| 1 | 1 | 3 | 1 | 1 | 1 | 4 | 3 | 3 |
| 1 | 3 | 1 | 1 | 4 | 1 | 4 | 2 | 3 |
| 1 | 3 | 1 | 1 | 4 | 1 | 4 | 4 | 1 |
| 4 | 4 | 4 | 4 | 4 | 4 | 4 | 3 | 3 |
| 2 | 4 | 3 | 2 | 3 | 1 | 3 | 2 | 3 |
| 3 | 3 | 2 | 3 | 4 | 2 | 3 | 3 | 1 |
| 4 | 4 | 4 | 1 | 4 | 2 | 4 | 4 | 3 |
| 3 | 4 | 3 | 4 | 4 | 4 | 4 | 2 | 3 |
| 3 | 3 | 1 | 1 | 4 | 1 | 4 | 3 | 3 |
| 3 | 3 | 3 | 3 | 4 | 2 | 4 | 3 | 3 |
| 4 | 4 | 2 | 1 | 3 | 1 | 3 | 2 | 3 |
| 3 | 4 | 3 | 2 | 4 | 2 | 4 | 3 | 4 |
| 4 | 4 | 1 | 4 | 4 | 4 | 4 | 3 | 3 |
| 2 | 2 | 1 | 1 | 3 | 1 | 3 | 3 | 3 |
| 1 | 2 | 2 | 2 | 3 | 2 | 3 | 3 | 3 |
| 4 | 4 | 4 | 4 | 4 | 4 | 4 | 4 | 4 |
| 2 | 3 | 2 | 3 | 2 | 3 | 3 | 3 | 3 |
| 2 | 4 | 4 | 2 | 4 | 2 | 3 | 3 | 3 |
| 2 | 4 | 4 | 4 | 4 | 4 | 4 | 4 | 1 |
| 2 | 3 | 3 | 2 | 3 | 2 | 3 | 4 | 4 |
| 1 | 3 | 2 | 2 | 3 | 1 | 3 | 3 | 3 |
| 1 | 1 | 1 | 1 | 1 | 1 | 4 | 4 | 1 |
| 2 | 3 | 4 | 2 | 2 | 3 | 2 | 3 | 4 |
| 1 | 1 | 2 | 1 | 3 | 1 | 4 | 4 | 3 |
| 2 | 2 | 2 | 2 | 2 | 1 | 4 | 2 | 2 |
| 3 | 3 | 3 | 3 | 3 | 3 | 3 | 3 | 3 |
| 2 | 3 | 1 | 2 | 3 | 2 | 4 | 4 | 4 |
| 3 | 2 | 3 | 2 | 2 | 3 | 2 | 2 | 3 |
| 3 | 4 | 4 | 2 | 4 | 3 | 4 | 4 | 4 |
| 3 | 4 | 3 | 2 | 3 | 3 | 4 | 2 | 3 |
| 1 | 4 | 1 | 1 | 3 | 1 | 3 | 3 | 1 |
| 1 | 3 | 1 | 1 | 4 | 1 | 4 | 2 | 1 |
| 2 | 3 | 3 | 2 | 3 | 2 | 3 | 2 | 3 |
| 4 | 2 | 4 | 2 | 2 | 3 | 2 | 3 | 3 |
| 3 | 2 | 2 | 1 | 4 | 1 | 4 | 3 | 2 |
| 2 | 3 | 1 | 1 | 4 | 1 | 4 | 4 | 2 |
| 3 | 3 | 2 | 2 | 3 | 2 | 3 | 3 | 3 |
| 1 | 1 | 3 | 2 | 3 | 1 | 3 | 2 | 3 |
| 3 | 1 | 3 | 4 | 2 | 4 | 2 | 2 | 2 |
| 4 | 3 | 2 | 3 | 3 | 3 | 3 | 3 | 4 |
| 4 | 4 | 1 | 4 | 1 | 4 | 4 | 4 | 4 |



|   |   |   |   |   |   |   |   |   |
|---|---|---|---|---|---|---|---|---|
| 1 | 1 | 1 | 1 | 1 | 1 | 2 | 1 | 1 |
| 4 | 4 | 4 | 2 | 4 | 1 | 4 | 4 | 4 |
| 2 | 1 | 2 | 1 | 3 | 1 | 3 | 2 | 2 |
| 2 | 3 | 3 | 3 | 3 | 3 | 3 | 3 | 3 |
| 2 | 4 | 4 | 3 | 3 | 2 | 3 | 4 | 3 |
| 1 | 1 | 1 | 1 | 1 | 2 | 4 | 3 | 2 |
| 4 | 4 | 4 | 2 | 4 | 1 | 4 | 2 | 4 |
| 3 | 2 | 1 | 1 | 3 | 1 | 3 | 3 | 2 |
| 1 | 1 | 3 | 2 | 3 | 3 | 2 | 2 | 4 |
| 3 | 2 | 3 | 4 | 2 | 3 | 3 | 4 | 4 |
| 2 | 3 | 2 | 1 | 2 | 1 | 4 | 4 | 3 |
| 2 | 2 | 2 | 2 | 2 | 3 | 2 | 2 | 2 |
| 3 | 3 | 1 | 1 | 2 | 2 | 3 | 3 | 3 |
| 3 | 3 | 2 | 2 | 3 | 2 | 3 | 3 | 3 |
| 3 | 3 | 2 | 3 | 3 | 3 | 3 | 3 | 3 |
| 2 | 3 | 3 | 4 | 3 | 4 | 3 | 3 | 3 |
| 3 | 3 | 2 | 3 | 2 | 3 | 3 | 2 | 3 |
| 3 | 2 | 1 | 2 | 3 | 1 | 1 | 4 | 3 |
| 2 | 3 | 3 | 2 | 3 | 2 | 3 | 2 | 3 |
| 1 | 1 | 1 | 1 | 1 | 1 | 3 | 3 | 3 |
| 3 | 2 | 3 | 2 | 3 | 2 | 3 | 3 | 3 |
| 2 | 2 | 2 | 2 | 2 | 2 | 2 | 3 | 1 |
| 3 | 4 | 3 | 3 | 3 | 3 | 3 | 3 | 3 |
| 3 | 3 | 3 | 3 | 2 | 4 | 2 | 3 | 3 |
| 2 | 4 | 3 | 2 | 3 | 2 | 4 | 2 | 4 |
| 2 | 4 | 2 | 3 | 4 | 2 | 3 | 2 | 3 |
| 2 | 2 | 3 | 3 | 3 | 3 | 3 | 2 | 3 |
| 2 | 2 | 3 | 3 | 3 | 3 | 3 | 2 | 4 |
| 4 | 4 | 2 | 4 | 3 | 4 | 4 | 4 | 4 |
| 2 | 4 | 3 | 4 | 4 | 4 | 2 | 2 | 4 |
| 1 | 2 | 3 | 2 | 2 | 1 | 3 | 2 | 2 |
| 2 | 1 | 1 | 2 | 2 | 2 | 3 | 4 | 2 |
| 4 | 4 | 4 | 4 | 4 | 4 | 4 | 4 | 4 |
| 1 | 3 | 2 | 2 | 4 | 2 | 3 | 3 | 4 |
| 2 | 3 | 1 | 2 | 4 | 2 | 3 | 4 | 2 |
| 3 | 3 | 2 | 2 | 3 | 2 | 3 | 3 | 3 |
| 2 | 2 | 1 | 2 | 1 | 1 | 2 | 1 | 3 |
| 2 | 2 | 2 | 2 | 2 | 2 | 2 | 2 | 2 |
| 3 | 2 | 1 | 1 | 3 | 1 | 4 | 3 | 1 |
| 3 | 3 | 3 | 2 | 3 | 2 | 3 | 2 | 3 |
| 4 | 4 | 4 | 4 | 4 | 4 | 4 | 4 | 4 |
| 2 | 1 | 2 | 1 | 1 | 1 | 4 | 1 | 4 |
| 2 | 1 | 2 | 1 | 1 | 1 | 3 | 3 | 3 |
| 2 | 2 | 2 | 2 | 4 | 2 | 3 | 2 | 2 |
| 3 | 3 | 1 | 1 | 4 | 1 | 4 | 4 | 1 |
| 3 | 3 | 4 | 3 | 2 | 4 | 2 | 1 | 4 |
| 3 | 2 | 4 | 3 | 1 | 4 | 1 | 4 | 4 |
| 3 | 3 | 3 | 3 | 3 | 3 | 3 | 3 | 3 |
| 4 | 4 | 4 | 4 | 1 | 4 | 1 | 1 | 2 |
| 3 | 3 | 3 | 4 | 4 | 3 | 3 | 4 | 2 |
| 3 | 4 | 3 | 3 | 3 | 3 | 2 | 2 | 4 |
| 1 | 1 | 3 | 1 | 3 | 1 | 3 | 3 | 2 |
| 4 | 4 | 4 | 4 | 4 | 4 | 4 | 4 | 4 |
| 2 | 2 | 3 | 1 | 4 | 3 | 4 | 4 | 3 |



|   |   |   |   |   |   |   |   |   |
|---|---|---|---|---|---|---|---|---|
| 1 | 1 | 4 | 1 | 1 | 1 | 4 | 4 | 4 |
| 3 | 3 | 3 | 3 | 3 | 3 | 3 | 3 | 3 |
| 1 | 2 | 2 | 2 | 2 | 2 | 4 | 1 | 4 |
| 3 | 3 | 2 | 2 | 3 | 2 | 3 | 3 | 3 |
| 4 | 4 | 4 | 3 | 4 | 4 | 4 | 2 | 4 |
| 2 | 4 | 1 | 1 | 4 | 1 | 4 | 4 | 3 |
| 1 | 1 | 2 | 2 | 1 | 2 | 1 | 2 | 3 |
| 3 | 2 | 3 | 3 | 3 | 3 | 3 | 3 | 3 |
| 2 | 3 | 4 | 4 | 4 | 4 | 4 | 4 | 4 |
| 1 | 1 | 1 | 1 | 4 | 1 | 4 | 1 | 4 |
| 3 | 2 | 3 | 2 | 3 | 3 | 2 | 2 | 2 |
| 3 | 2 | 3 | 3 | 3 | 3 | 3 | 3 | 3 |
| 2 | 2 | 2 | 3 | 3 | 3 | 2 | 2 | 3 |
| 4 | 4 | 4 | 4 | 4 | 4 | 4 | 4 | 4 |
| 4 | 3 | 4 | 3 | 3 | 3 | 4 | 2 | 3 |
| 1 | 4 | 3 | 2 | 2 | 2 | 1 | 4 | 3 |
| 2 | 4 | 1 | 2 | 3 | 2 | 4 | 1 | 4 |
| 4 | 4 | 4 | 4 | 4 | 4 | 4 | 4 | 4 |
| 4 | 4 | 4 | 4 | 4 | 4 | 3 | 4 | 1 |
| 2 | 2 | 1 | 1 | 4 | 1 | 4 | 4 | 1 |
| 4 | 1 | 1 | 1 | 1 | 3 | 2 | 3 | 2 |
| 3 | 3 | 2 | 2 | 4 | 1 | 4 | 1 | 3 |
| 4 | 3 | 1 | 1 | 4 | 1 | 4 | 4 | 3 |
| 3 | 3 | 3 | 3 | 3 | 3 | 3 | 3 | 3 |
| 4 | 4 | 3 | 2 | 4 | 1 | 4 | 4 | 2 |
| 2 | 4 | 2 | 1 | 4 | 1 | 4 | 4 | 4 |
| 2 | 4 | 2 | 1 | 4 | 1 | 4 | 2 | 3 |
| 1 | 2 | 3 | 2 | 3 | 3 | 4 | 3 | 3 |
| 2 | 2 | 2 | 3 | 3 | 3 | 3 | 2 | 3 |
| 2 | 2 | 1 | 1 | 4 | 1 | 4 | 4 | 1 |
| 2 | 3 | 1 | 1 | 3 | 1 | 4 | 4 | 3 |
| 4 | 4 | 4 | 4 | 4 | 4 | 4 | 4 | 4 |
| 1 | 4 | 1 | 1 | 4 | 1 | 4 | 4 | 1 |
| 2 | 4 | 4 | 1 | 4 | 2 | 4 | 3 | 4 |
| 2 | 1 | 1 | 2 | 2 | 2 | 4 | 4 | 3 |
| 2 | 2 | 1 | 1 | 1 | 1 | 3 | 3 | 3 |
| 3 | 3 | 3 | 4 | 4 | 3 | 3 | 3 | 3 |
| 4 | 4 | 1 | 1 | 4 | 1 | 4 | 4 | 1 |
| 1 | 4 | 4 | 1 | 4 | 1 | 4 | 1 | 4 |
| 2 | 3 | 3 | 3 | 3 | 4 | 4 | 2 | 3 |
| 2 | 2 | 2 | 2 | 3 | 2 | 3 | 3 | 2 |
| 1 | 1 | 1 | 1 | 4 | 1 | 4 | 4 | 3 |
| 1 | 4 | 4 | 1 | 4 | 1 | 4 | 4 | 1 |
| 1 | 3 | 2 | 1 | 3 | 1 | 4 | 4 | 3 |
| 1 | 1 | 1 | 1 | 1 | 1 | 1 | 1 | 2 |
| 4 | 4 | 4 | 4 | 4 | 4 | 4 | 4 | 4 |
| 1 | 1 | 4 | 1 | 1 | 1 | 4 | 4 | 4 |
| 1 | 3 | 3 | 1 | 4 | 1 | 4 | 2 | 4 |
| 3 | 3 | 3 | 3 | 3 | 3 | 2 | 2 | 3 |
| 3 | 3 | 1 | 1 | 4 | 1 | 4 | 3 | 1 |
| 3 | 2 | 3 | 2 | 3 | 2 | 3 | 2 | 3 |
| 4 | 4 | 4 | 4 | 4 | 4 | 4 | 4 | 4 |
| 2 | 2 | 3 | 1 | 3 | 1 | 3 | 4 | 3 |
| 1 | 1 | 4 | 4 | 4 | 4 | 3 | 1 | 4 |

|   |   |   |   |   |   |   |   |   |
|---|---|---|---|---|---|---|---|---|
| 1 | 1 | 1 | 1 | 4 | 1 | 3 | 4 | 3 |
| 1 | 3 | 2 | 3 | 3 | 3 | 3 | 2 | 1 |
| 1 | 4 | 1 | 1 | 3 | 1 | 4 | 3 | 3 |
| 4 | 2 | 3 | 3 | 3 | 3 | 3 | 2 | 2 |
| 4 | 4 | 4 | 4 | 4 | 4 | 4 | 4 | 4 |
| 1 | 4 | 1 | 1 | 4 | 1 | 4 | 4 | 1 |
| 2 | 3 | 4 | 3 | 4 | 3 | 3 | 3 | 3 |
| 4 | 4 | 1 | 4 | 4 | 4 | 1 | 1 | 4 |
| 1 | 4 | 2 | 2 | 4 | 1 | 4 | 4 | 4 |
| 4 | 4 | 4 | 4 | 4 | 4 | 1 | 4 | 4 |
| 4 | 1 | 1 | 1 | 1 | 1 | 4 | 4 | 3 |
| 2 | 2 | 3 | 3 | 4 | 2 | 3 | 4 | 4 |
| 4 | 1 | 1 | 1 | 1 | 1 | 4 | 4 | 3 |
| 4 | 4 | 4 | 4 | 4 | 4 | 4 | 3 | 3 |
| 4 | 2 | 4 | 3 | 3 | 1 | 3 | 2 | 4 |
| 4 | 4 | 1 | 1 | 4 | 1 | 4 | 3 | 3 |
| 4 | 2 | 4 | 3 | 3 | 1 | 3 | 2 | 4 |
| 1 | 4 | 4 | 2 | 4 | 1 | 4 | 3 | 1 |
| 2 | 3 | 1 | 1 | 3 | 1 | 3 | 4 | 1 |
| 2 | 3 | 2 | 2 | 4 | 2 | 3 | 2 | 3 |
| 1 | 1 | 1 | 1 | 1 | 1 | 3 | 4 | 1 |
| 3 | 3 | 3 | 3 | 3 | 3 | 3 | 3 | 3 |
| 4 | 4 | 4 | 4 | 4 | 4 | 4 | 4 | 4 |
| 4 | 4 | 1 | 4 | 4 | 1 | 4 | 1 | 1 |
| 2 | 2 | 2 | 2 | 2 | 2 | 2 | 2 | 2 |
| 3 | 3 | 3 | 3 | 3 | 3 | 3 | 3 | 3 |
| 2 | 2 | 1 | 1 | 3 | 2 | 4 | 4 | 2 |
| 2 | 3 | 3 | 2 | 3 | 2 | 3 | 3 | 3 |
| 4 | 4 | 4 | 3 | 4 | 4 | 2 | 4 | 4 |
| 4 | 2 | 3 | 4 | 1 | 4 | 3 | 2 | 3 |
| 2 | 2 | 2 | 2 | 2 | 2 | 3 | 3 | 3 |
| 2 | 2 | 2 | 2 | 2 | 2 | 3 | 3 | 3 |
| 1 | 3 | 4 | 1 | 4 | 1 | 4 | 4 | 4 |
| 3 | 3 | 2 | 2 | 3 | 2 | 3 | 3 | 2 |
| 3 | 3 | 3 | 3 | 4 | 2 | 4 | 3 | 3 |
| 2 | 2 | 3 | 2 | 3 | 3 | 3 | 2 | 3 |
| 1 | 3 | 3 | 2 | 2 | 1 | 3 | 3 | 3 |
| 2 | 1 | 1 | 1 | 2 | 1 | 2 | 2 | 2 |
| 3 | 3 | 1 | 2 | 3 | 2 | 3 | 2 | 3 |
| 2 | 3 | 3 | 3 | 3 | 3 | 3 | 3 | 3 |
| 4 | 4 | 3 | 4 | 4 | 2 | 4 | 4 | 4 |
| 1 | 4 | 3 | 3 | 4 | 1 | 3 | 3 | 2 |
| 1 | 4 | 2 | 1 | 4 | 1 | 4 | 2 | 2 |
| 2 | 3 | 2 | 2 | 3 | 2 | 2 | 3 | 3 |
| 3 | 3 | 4 | 4 | 4 | 4 | 4 | 4 | 4 |
| 4 | 4 | 1 | 1 | 1 | 1 | 4 | 4 | 4 |
| 4 | 4 | 2 | 3 | 3 | 3 | 4 | 3 | 2 |
| 1 | 3 | 1 | 1 | 3 | 1 | 3 | 2 | 2 |
| 1 | 1 | 1 | 1 | 3 | 2 | 3 | 3 | 1 |
| 2 | 2 | 1 | 2 | 2 | 2 | 3 | 3 | 2 |
| 2 | 2 | 3 | 2 | 3 | 1 | 3 | 2 | 2 |
| 1 | 1 | 1 | 1 | 1 | 1 | 3 | 4 | 3 |
| 3 | 3 | 3 | 3 | 3 | 3 | 3 | 3 | 3 |
| 2 | 3 | 3 | 3 | 3 | 3 | 3 | 3 | 3 |

|   |   |   |   |   |   |   |   |   |
|---|---|---|---|---|---|---|---|---|
| 3 | 4 | 2 | 1 | 4 | 1 | 4 | 4 | 3 |
| 3 | 3 | 4 | 3 | 2 | 3 | 2 | 1 | 3 |
| 2 | 2 | 4 | 3 | 3 | 4 | 3 | 3 | 3 |
| 3 | 2 | 3 | 2 | 3 | 1 | 3 | 3 | 3 |
| 4 | 4 | 1 | 1 | 1 | 1 | 1 | 1 | 4 |
| 1 | 1 | 1 | 1 | 3 | 3 | 4 | 2 | 1 |
| 1 | 4 | 4 | 1 | 4 | 1 | 4 | 3 | 2 |
| 2 | 3 | 3 | 4 | 2 | 3 | 1 | 1 | 3 |
| 3 | 3 | 3 | 3 | 3 | 3 | 3 | 3 | 3 |
| 2 | 2 | 2 | 2 | 4 | 2 | 4 | 2 | 1 |
| 4 | 4 | 4 | 4 | 4 | 4 | 1 | 4 | 4 |
| 4 | 4 | 4 | 4 | 4 | 4 | 4 | 4 | 4 |
| 2 | 2 | 3 | 2 | 3 | 2 | 2 | 3 | 3 |
| 3 | 2 | 3 | 2 | 3 | 2 | 3 | 4 | 3 |
| 1 | 4 | 4 | 1 | 4 | 1 | 4 | 4 | 1 |
| 4 | 1 | 4 | 1 | 4 | 4 | 4 | 2 | 4 |
| 2 | 3 | 3 | 2 | 3 | 2 | 3 | 2 | 3 |
| 3 | 3 | 3 | 3 | 2 | 4 | 3 | 2 | 4 |
| 2 | 2 | 3 | 2 | 3 | 2 | 3 | 2 | 2 |
| 1 | 2 | 3 | 1 | 3 | 1 | 3 | 3 | 3 |
| 4 | 4 | 4 | 4 | 4 | 4 | 4 | 4 | 4 |
| 3 | 3 | 3 | 3 | 3 | 3 | 3 | 3 | 3 |
| 2 | 2 | 2 | 2 | 2 | 2 | 3 | 3 | 2 |
| 1 | 3 | 1 | 1 | 4 | 1 | 4 | 4 | 1 |
| 3 | 3 | 3 | 3 | 3 | 2 | 4 | 3 | 3 |
| 4 | 4 | 2 | 4 | 4 | 4 | 4 | 2 | 3 |
| 2 | 4 | 1 | 1 | 4 | 1 | 4 | 4 | 1 |
| 4 | 4 | 3 | 4 | 4 | 4 | 2 | 2 | 4 |
| 3 | 3 | 4 | 4 | 4 | 3 | 4 | 4 | 2 |
| 2 | 2 | 2 | 3 | 1 | 1 | 3 | 1 | 1 |
| 1 | 3 | 2 | 1 | 3 | 1 | 3 | 4 | 3 |
| 2 | 3 | 3 | 2 | 3 | 3 | 3 | 3 | 3 |
| 3 | 3 | 3 | 3 | 3 | 3 | 3 | 3 | 3 |
| 2 | 2 | 2 | 3 | 3 | 3 | 3 | 2 | 2 |
| 1 | 1 | 4 | 4 | 1 | 4 | 4 | 1 | 4 |
| 1 | 3 | 1 | 1 | 4 | 1 | 4 | 4 | 1 |
| 2 | 2 | 3 | 3 | 3 | 2 | 3 | 3 | 3 |
| 2 | 3 | 1 | 2 | 1 | 2 | 4 | 3 | 2 |
| 1 | 2 | 2 | 3 | 3 | 3 | 3 | 3 | 4 |
| 2 | 2 | 4 | 2 | 3 | 2 | 2 | 2 | 2 |
| 3 | 3 | 3 | 3 | 3 | 3 | 3 | 3 | 3 |
| 2 | 3 | 3 | 2 | 3 | 2 | 3 | 2 | 3 |
| 4 | 4 | 4 | 4 | 4 | 4 | 4 | 4 | 4 |
| 1 | 3 | 2 | 1 | 3 | 1 | 4 | 4 | 3 |
| 3 | 3 | 1 | 2 | 3 | 3 | 3 | 3 | 1 |
| 3 | 3 | 2 | 1 | 4 | 1 | 3 | 1 | 1 |
| 3 | 4 | 3 | 3 | 3 | 3 | 3 | 3 | 2 |
| 3 | 3 | 3 | 3 | 3 | 3 | 3 | 3 | 3 |
| 1 | 3 | 3 | 3 | 2 | 3 | 3 | 1 | 4 |
| 4 | 4 | 4 | 3 | 4 | 3 | 4 | 3 | 3 |
| 2 | 3 | 3 | 1 | 3 | 1 | 4 | 4 | 3 |
| 2 | 3 | 1 | 1 | 4 | 1 | 4 | 3 | 1 |
| 1 | 1 | 2 | 1 | 2 | 1 | 4 | 2 | 1 |
| 3 | 3 | 1 | 1 | 3 | 1 | 3 | 2 | 2 |

|   |   |   |   |   |   |   |   |   |
|---|---|---|---|---|---|---|---|---|
| 3 | 2 | 3 | 1 | 2 | 1 | 3 | 2 | 3 |
| 3 | 3 | 3 | 3 | 3 | 2 | 3 | 2 | 2 |
| 1 | 2 | 1 | 2 | 3 | 1 | 3 | 2 | 2 |
| 2 | 3 | 1 | 1 | 3 | 1 | 3 | 3 | 1 |
| 2 | 3 | 3 | 3 | 3 | 3 | 2 | 2 | 3 |
| 3 | 2 | 3 | 2 | 3 | 2 | 3 | 3 | 4 |
| 1 | 1 | 1 | 1 | 1 | 1 | 1 | 2 | 1 |
| 4 | 4 | 4 | 4 | 4 | 4 | 4 | 4 | 4 |
| 1 | 2 | 3 | 1 | 4 | 1 | 4 | 4 | 4 |
| 3 | 2 | 2 | 3 | 2 | 2 | 3 | 3 | 3 |
| 3 | 2 | 2 | 3 | 2 | 2 | 3 | 3 | 3 |
| 4 | 3 | 4 | 4 | 3 | 3 | 4 | 4 | 4 |
| 3 | 1 | 4 | 2 | 1 | 1 | 4 | 2 | 3 |
| 1 | 1 | 1 | 1 | 3 | 1 | 3 | 3 | 3 |
| 1 | 4 | 3 | 1 | 4 | 1 | 4 | 4 | 4 |
| 1 | 1 | 1 | 1 | 4 | 1 | 4 | 1 | 1 |
| 2 | 1 | 3 | 1 | 3 | 1 | 3 | 4 | 2 |
| 3 | 1 | 3 | 2 | 1 | 1 | 4 | 4 | 2 |
| 1 | 3 | 4 | 3 | 3 | 4 | 4 | 4 | 4 |
| 1 | 2 | 3 | 1 | 1 | 2 | 3 | 2 | 4 |
| 2 | 3 | 3 | 2 | 3 | 1 | 4 | 4 | 3 |
| 4 | 3 | 2 | 4 | 3 | 4 | 4 | 3 | 3 |
| 1 | 1 | 1 | 1 | 1 | 1 | 1 | 4 | 1 |
| 3 | 4 | 2 | 2 | 4 | 1 | 4 | 4 | 1 |
| 2 | 3 | 2 | 1 | 4 | 1 | 4 | 1 | 3 |
| 1 | 2 | 2 | 1 | 2 | 1 | 4 | 4 | 3 |
| 2 | 2 | 2 | 2 | 3 | 2 | 3 | 3 | 3 |
| 1 | 1 | 3 | 2 | 1 | 1 | 1 | 2 | 3 |
| 3 | 3 | 3 | 3 | 3 | 3 | 3 | 3 | 3 |
| 4 | 4 | 1 | 1 | 4 | 1 | 4 | 4 | 1 |
| 4 | 2 | 1 | 1 | 3 | 1 | 1 | 1 | 3 |
| 1 | 3 | 4 | 1 | 4 | 1 | 3 | 3 | 2 |
| 4 | 4 | 3 | 2 | 4 | 2 | 2 | 1 | 4 |
| 2 | 1 | 3 | 1 | 1 | 1 | 3 | 4 | 3 |
| 4 | 4 | 1 | 3 | 3 | 4 | 4 | 4 | 1 |
| 1 | 4 | 1 | 1 | 3 | 1 | 3 | 4 | 2 |
| 2 | 2 | 2 | 3 | 2 | 3 | 3 | 2 | 3 |
| 2 | 3 | 1 | 4 | 4 | 3 | 2 | 4 | 3 |
| 1 | 4 | 1 | 1 | 4 | 1 | 4 | 4 | 4 |
| 2 | 3 | 2 | 1 | 3 | 1 | 4 | 3 | 3 |
| 1 | 3 | 1 | 1 | 2 | 1 | 3 | 3 | 2 |
| 2 | 3 | 3 | 2 | 3 | 2 | 3 | 2 | 3 |
| 4 | 4 | 1 | 1 | 4 | 1 | 4 | 4 | 1 |
| 2 | 2 | 2 | 2 | 3 | 2 | 3 | 3 | 3 |
| 2 | 3 | 2 | 1 | 3 | 1 | 2 | 3 | 3 |
| 1 | 3 | 2 | 2 | 3 | 1 | 3 | 3 | 4 |
| 1 | 1 | 1 | 1 | 3 | 2 | 3 | 3 | 1 |
| 2 | 4 | 3 | 3 | 4 | 3 | 3 | 3 | 2 |
| 2 | 3 | 1 | 1 | 3 | 1 | 3 | 3 | 3 |
| 1 | 3 | 2 | 1 | 2 | 1 | 1 | 4 | 3 |
| 1 | 1 | 1 | 1 | 4 | 1 | 4 | 4 | 1 |
| 1 | 1 | 1 | 1 | 4 | 1 | 4 | 1 | 1 |
| 2 | 2 | 1 | 2 | 2 | 1 | 4 | 4 | 3 |
| 4 | 2 | 2 | 2 | 1 | 1 | 3 | 3 | 2 |

|   |   |   |   |   |   |   |   |   |
|---|---|---|---|---|---|---|---|---|
| 1 | 3 | 4 | 3 | 2 | 3 | 1 | 2 | 4 |
| 2 | 4 | 3 | 3 | 4 | 3 | 4 | 4 | 3 |
| 1 | 1 | 3 | 1 | 4 | 1 | 4 | 4 | 1 |
| 3 | 3 | 1 | 2 | 3 | 2 | 3 | 2 | 3 |
| 2 | 2 | 3 | 2 | 4 | 2 | 3 | 2 | 3 |
| 2 | 2 | 3 | 3 | 2 | 3 | 3 | 2 | 4 |
| 1 | 3 | 3 | 1 | 2 | 1 | 2 | 1 | 3 |
| 1 | 4 | 1 | 1 | 4 | 1 | 4 | 3 | 3 |
| 2 | 2 | 1 | 2 | 3 | 2 | 3 | 3 | 3 |
| 3 | 3 | 3 | 2 | 3 | 1 | 4 | 4 | 4 |
| 1 | 2 | 3 | 1 | 3 | 2 | 4 | 2 | 3 |
| 4 | 2 | 2 | 1 | 3 | 1 | 4 | 4 | 3 |
| 1 | 3 | 2 | 3 | 4 | 1 | 3 | 3 | 2 |
| 3 | 4 | 3 | 1 | 4 | 1 | 4 | 4 | 1 |
| 3 | 4 | 3 | 1 | 4 | 1 | 4 | 4 | 1 |
| 3 | 4 | 2 | 2 | 2 | 1 | 3 | 2 | 1 |
| 3 | 3 | 3 | 3 | 3 | 3 | 3 | 3 | 3 |
| 1 | 1 | 1 | 1 | 3 | 2 | 3 | 2 | 2 |
| 2 | 3 | 3 | 2 | 3 | 1 | 4 | 3 | 1 |
| 1 | 4 | 3 | 3 | 3 | 1 | 4 | 4 | 4 |
| 3 | 3 | 3 | 4 | 4 | 4 | 3 | 4 | 4 |
| 3 | 2 | 3 | 3 | 2 | 3 | 3 | 3 | 3 |
| 3 | 1 | 1 | 1 | 1 | 1 | 1 | 1 | 1 |
| 3 | 3 | 3 | 3 | 3 | 3 | 3 | 3 | 3 |
| 2 | 3 | 3 | 2 | 3 | 2 | 3 | 2 | 3 |
| 2 | 2 | 3 | 2 | 3 | 2 | 3 | 2 | 3 |
| 2 | 2 | 3 | 2 | 2 | 2 | 2 | 2 | 3 |
| 1 | 3 | 1 | 1 | 4 | 1 | 4 | 1 | 1 |
| 2 | 2 | 2 | 2 | 2 | 2 | 2 | 2 | 2 |
| 1 | 2 | 2 | 1 | 2 | 1 | 3 | 3 | 2 |
| 2 | 2 | 2 | 2 | 2 | 2 | 2 | 2 | 3 |
| 1 | 1 | 2 | 1 | 3 | 2 | 3 | 3 | 3 |
| 1 | 1 | 1 | 1 | 2 | 1 | 4 | 4 | 3 |
| 1 | 3 | 1 | 1 | 3 | 1 | 3 | 3 | 2 |
| 3 | 3 | 2 | 2 | 2 | 2 | 3 | 3 | 2 |
| 2 | 3 | 3 | 2 | 3 | 2 | 3 | 3 | 3 |
| 3 | 2 | 3 | 3 | 3 | 3 | 3 | 3 | 3 |
| 3 | 3 | 1 | 1 | 4 | 1 | 4 | 4 | 1 |
| 2 | 2 | 2 | 3 | 3 | 4 | 2 | 2 | 4 |
| 3 | 2 | 2 | 2 | 2 | 1 | 4 | 4 | 4 |
| 3 | 4 | 2 | 3 | 4 | 2 | 4 | 4 | 1 |
| 2 | 4 | 1 | 1 | 4 | 1 | 3 | 4 | 3 |
| 3 | 3 | 3 | 3 | 2 | 3 | 2 | 3 | 3 |
| 1 | 2 | 2 | 1 | 3 | 2 | 3 | 3 | 3 |
| 2 | 2 | 2 | 2 | 4 | 2 | 3 | 2 | 4 |
| 4 | 1 | 4 | 4 | 1 | 4 | 4 | 4 | 1 |
| 2 | 4 | 1 | 1 | 4 | 1 | 3 | 4 | 3 |
| 2 | 2 | 3 | 2 | 4 | 2 | 3 | 3 | 3 |
| 3 | 3 | 3 | 2 | 3 | 2 | 3 | 3 | 2 |
| 3 | 1 | 1 | 1 | 3 | 1 | 4 | 3 | 2 |
| 2 | 3 | 2 | 1 | 4 | 2 | 3 | 2 | 2 |
| 3 | 3 | 2 | 2 | 3 | 3 | 2 | 1 | 3 |
| 4 | 2 | 1 | 1 | 1 | 1 | 4 | 4 | 3 |
| 3 | 1 | 2 | 2 | 2 | 2 | 3 | 2 | 3 |

|   |   |   |   |   |   |   |   |   |
|---|---|---|---|---|---|---|---|---|
| 1 | 2 | 1 | 1 | 4 | 1 | 4 | 3 | 1 |
| 3 | 3 | 3 | 2 | 3 | 2 | 3 | 3 | 3 |
| 3 | 3 | 2 | 2 | 3 | 2 | 3 | 2 | 3 |
| 4 | 4 | 4 | 4 | 4 | 4 | 3 | 4 | 3 |
| 2 | 2 | 2 | 2 | 3 | 1 | 3 | 4 | 3 |
| 3 | 1 | 2 | 2 | 2 | 2 | 3 | 2 | 3 |

| A15 | A16 | A17 | A18 | A19 | A20 | A21 | A22 | A23 |   |
|-----|-----|-----|-----|-----|-----|-----|-----|-----|---|
| 2   | 3   | 2   | 3   | 3   | 3   | 3   | 2   | 3   | 3 |
| 2   | 4   | 4   | 1   | 4   | 4   | 3   | 4   | 1   | 4 |
| 3   | 3   | 2   | 3   | 3   | 3   | 3   | 2   | 2   | 3 |
| 3   | 3   | 2   | 3   | 2   | 2   | 2   | 2   | 2   | 2 |
| 4   | 4   | 4   | 1   | 4   | 4   | 4   | 4   | 4   | 4 |
| 1   | 3   | 2   | 2   | 2   | 2   | 4   | 1   | 1   | 1 |
| 2   | 2   | 3   | 2   | 2   | 2   | 3   | 2   | 1   | 2 |
| 2   | 3   | 3   | 2   | 3   | 3   | 4   | 1   | 1   | 3 |
| 1   | 4   | 1   | 4   | 4   | 4   | 1   | 1   | 1   | 4 |
| 1   | 4   | 1   | 4   | 4   | 4   | 4   | 1   | 2   | 4 |
| 4   | 3   | 1   | 3   | 4   | 3   | 3   | 3   | 3   | 3 |
| 2   | 3   | 2   | 3   | 3   | 3   | 3   | 1   | 2   | 3 |
| 1   | 4   | 1   | 4   | 4   | 4   | 4   | 1   | 3   | 4 |
| 4   | 1   | 4   | 4   | 4   | 4   | 4   | 4   | 4   | 4 |
| 3   | 3   | 1   | 3   | 3   | 1   | 2   | 2   | 1   | 3 |
| 1   | 3   | 3   | 4   | 4   | 1   | 1   | 1   | 1   | 4 |
| 1   | 3   | 4   | 2   | 3   | 3   | 3   | 1   | 1   | 4 |
| 4   | 4   | 4   | 4   | 4   | 4   | 4   | 4   | 4   | 4 |
| 2   | 3   | 2   | 3   | 4   | 3   | 3   | 2   | 2   | 3 |
| 4   | 4   | 3   | 2   | 4   | 2   | 4   | 4   | 3   | 4 |
| 2   | 3   | 4   | 2   | 3   | 2   | 2   | 2   | 2   | 3 |
| 2   | 3   | 2   | 2   | 2   | 4   | 2   | 2   | 1   | 3 |
| 1   | 4   | 1   | 4   | 4   | 4   | 4   | 1   | 4   | 4 |
| 2   | 3   | 2   | 2   | 3   | 2   | 2   | 2   | 3   | 3 |
| 3   | 2   | 2   | 3   | 3   | 2   | 3   | 3   | 3   | 2 |
| 3   | 3   | 3   | 3   | 4   | 3   | 2   | 2   | 2   | 3 |
| 3   | 3   | 3   | 3   | 3   | 3   | 3   | 3   | 2   | 2 |
| 2   | 3   | 2   | 3   | 3   | 2   | 2   | 2   | 2   | 3 |
| 2   | 4   | 3   | 3   | 2   | 2   | 1   | 1   | 1   | 1 |
| 2   | 3   | 3   | 3   | 3   | 3   | 3   | 3   | 2   | 3 |
| 4   | 3   | 2   | 3   | 3   | 3   | 3   | 3   | 3   | 3 |
| 1   | 4   | 1   | 4   | 4   | 4   | 4   | 1   | 2   | 4 |
| 2   | 3   | 2   | 3   | 3   | 3   | 3   | 2   | 1   | 2 |
| 3   | 3   | 3   | 3   | 3   | 3   | 3   | 3   | 3   | 3 |
| 3   | 4   | 4   | 2   | 3   | 4   | 2   | 2   | 2   | 1 |
| 3   | 3   | 3   | 3   | 3   | 3   | 3   | 3   | 3   | 3 |
| 3   | 4   | 2   | 4   | 4   | 3   | 2   | 2   | 2   | 4 |
| 4   | 4   | 4   | 4   | 4   | 4   | 4   | 4   | 4   | 4 |
| 3   | 3   | 1   | 2   | 3   | 4   | 4   | 4   | 3   | 3 |
| 4   | 4   | 4   | 4   | 4   | 4   | 4   | 4   | 4   | 4 |
| 1   | 4   | 1   | 2   | 4   | 4   | 4   | 1   | 1   | 4 |
| 1   | 3   | 3   | 3   | 3   | 3   | 3   | 2   | 3   | 3 |
| 3   | 3   | 3   | 3   | 3   | 3   | 3   | 3   | 3   | 3 |
| 3   | 3   | 3   | 3   | 3   | 3   | 3   | 3   | 3   | 3 |
| 1   | 1   | 1   | 4   | 4   | 1   | 1   | 1   | 4   | 4 |
| 4   | 3   | 2   | 3   | 3   | 3   | 3   | 3   | 3   | 3 |
| 3   | 3   | 3   | 3   | 3   | 3   | 3   | 3   | 3   | 3 |
| 4   | 4   | 4   | 4   | 4   | 4   | 4   | 4   | 4   | 4 |
| 1   | 1   | 2   | 2   | 1   | 2   | 1   | 1   | 1   | 2 |
| 3   | 3   | 3   | 3   | 3   | 3   | 3   | 3   | 3   | 3 |
| 4   | 4   | 4   | 4   | 4   | 4   | 4   | 4   | 4   | 4 |
| 1   | 4   | 3   | 4   | 4   | 1   | 1   | 1   | 1   | 4 |
| 2   | 3   | 1   | 3   | 3   | 3   | 1   | 2   | 3   | 3 |

|   |   |   |   |   |   |   |   |   |
|---|---|---|---|---|---|---|---|---|
| 3 | 3 | 4 | 2 | 3 | 3 | 3 | 2 | 2 |
| 1 | 3 | 3 | 4 | 4 | 2 | 2 | 1 | 4 |
| 4 | 4 | 2 | 2 | 3 | 2 | 3 | 4 | 3 |
| 1 | 1 | 1 | 1 | 1 | 1 | 1 | 1 | 1 |
| 4 | 4 | 4 | 2 | 4 | 4 | 2 | 4 | 4 |
| 1 | 4 | 1 | 4 | 4 | 1 | 2 | 1 | 4 |
| 3 | 2 | 1 | 3 | 3 | 1 | 1 | 1 | 4 |
| 1 | 1 | 1 | 1 | 1 | 1 | 1 | 1 | 1 |
| 4 | 3 | 4 | 2 | 4 | 2 | 2 | 4 | 4 |
| 3 | 3 | 2 | 3 | 3 | 3 | 2 | 3 | 2 |
| 2 | 3 | 2 | 3 | 1 | 1 | 2 | 1 | 1 |
| 2 | 4 | 2 | 3 | 4 | 3 | 2 | 1 | 3 |
| 1 | 4 | 2 | 4 | 4 | 1 | 1 | 1 | 4 |
| 1 | 1 | 1 | 1 | 1 | 1 | 1 | 1 | 1 |
| 1 | 1 | 2 | 3 | 3 | 4 | 2 | 1 | 4 |
| 1 | 4 | 1 | 4 | 3 | 4 | 1 | 4 | 3 |
| 1 | 1 | 1 | 1 | 1 | 1 | 1 | 1 | 1 |
| 1 | 4 | 1 | 4 | 1 | 3 | 1 | 1 | 1 |
| 3 | 4 | 2 | 4 | 4 | 4 | 1 | 4 | 4 |
| 2 | 3 | 2 | 3 | 3 | 2 | 2 | 1 | 4 |
| 2 | 2 | 3 | 2 | 3 | 2 | 2 | 2 | 4 |
| 3 | 3 | 3 | 3 | 3 | 2 | 2 | 2 | 3 |
| 4 | 2 | 4 | 2 | 2 | 4 | 2 | 1 | 2 |
| 4 | 4 | 4 | 4 | 4 | 4 | 4 | 4 | 4 |
| 1 | 1 | 1 | 4 | 1 | 1 | 1 | 1 | 1 |
| 4 | 4 | 4 | 3 | 3 | 2 | 4 | 1 | 3 |
| 1 | 3 | 3 | 2 | 3 | 1 | 1 | 1 | 3 |
| 3 | 3 | 3 | 3 | 3 | 3 | 3 | 3 | 3 |
| 3 | 2 | 2 | 2 | 2 | 2 | 2 | 2 | 2 |
| 1 | 1 | 3 | 1 | 1 | 1 | 1 | 1 | 1 |
| 3 | 2 | 3 | 2 | 3 | 2 | 3 | 2 | 3 |
| 3 | 4 | 1 | 3 | 3 | 1 | 4 | 1 | 3 |
| 2 | 3 | 3 | 3 | 3 | 3 | 2 | 2 | 3 |
| 2 | 2 | 4 | 2 | 2 | 2 | 2 | 2 | 2 |
| 3 | 2 | 3 | 3 | 3 | 3 | 3 | 3 | 3 |
| 1 | 4 | 1 | 4 | 4 | 1 | 1 | 1 | 4 |
| 1 | 4 | 1 | 4 | 4 | 4 | 1 | 1 | 4 |
| 2 | 3 | 3 | 3 | 4 | 3 | 1 | 1 | 3 |
| 3 | 4 | 1 | 4 | 4 | 3 | 4 | 3 | 4 |
| 2 | 3 | 1 | 3 | 3 | 3 | 1 | 1 | 4 |
| 3 | 3 | 2 | 3 | 2 | 3 | 3 | 2 | 3 |
| 2 | 3 | 3 | 3 | 3 | 3 | 2 | 2 | 3 |
| 4 | 4 | 4 | 1 | 1 | 4 | 4 | 1 | 4 |
| 1 | 3 | 1 | 3 | 4 | 1 | 1 | 1 | 3 |
| 2 | 3 | 2 | 4 | 4 | 1 | 1 | 1 | 4 |
| 3 | 3 | 2 | 3 | 3 | 2 | 2 | 2 | 3 |
| 2 | 3 | 2 | 1 | 1 | 1 | 1 | 1 | 1 |
| 1 | 4 | 1 | 4 | 4 | 1 | 2 | 2 | 4 |
| 2 | 4 | 2 | 4 | 4 | 1 | 1 | 1 | 4 |
| 2 | 3 | 1 | 4 | 2 | 2 | 1 | 2 | 2 |
| 1 | 2 | 1 | 2 | 4 | 1 | 4 | 1 | 3 |
| 4 | 4 | 4 | 4 | 4 | 1 | 2 | 4 | 4 |
| 1 | 1 | 1 | 1 | 1 | 1 | 1 | 1 | 1 |
| 4 | 4 | 1 | 2 | 4 | 1 | 2 | 1 | 3 |



|   |   |   |   |   |   |   |   |   |
|---|---|---|---|---|---|---|---|---|
| 4 | 4 | 2 | 3 | 3 | 3 | 2 | 2 | 2 |
| 3 | 3 | 2 | 2 | 2 | 1 | 3 | 1 | 2 |
| 3 | 4 | 2 | 3 | 1 | 1 | 1 | 1 | 3 |
| 4 | 4 | 4 | 4 | 4 | 4 | 4 | 4 | 4 |
| 3 | 3 | 2 | 3 | 4 | 3 | 2 | 2 | 3 |
| 2 | 3 | 2 | 2 | 4 | 3 | 2 | 1 | 4 |
| 2 | 3 | 3 | 3 | 3 | 2 | 2 | 1 | 3 |
| 1 | 4 | 1 | 3 | 4 | 1 | 1 | 1 | 4 |
| 1 | 3 | 3 | 4 | 4 | 1 | 1 | 1 | 4 |
| 4 | 4 | 2 | 4 | 1 | 4 | 4 | 1 | 1 |
| 3 | 3 | 3 | 3 | 3 | 2 | 3 | 3 | 2 |
| 2 | 3 | 1 | 3 | 3 | 3 | 1 | 1 | 3 |
| 3 | 4 | 3 | 2 | 3 | 2 | 3 | 1 | 3 |
| 3 | 4 | 3 | 3 | 4 | 3 | 2 | 2 | 4 |
| 2 | 3 | 3 | 3 | 3 | 3 | 2 | 1 | 4 |
| 3 | 3 | 4 | 3 | 3 | 1 | 2 | 1 | 3 |
| 3 | 3 | 1 | 3 | 3 | 3 | 2 | 1 | 3 |
| 1 | 4 | 1 | 4 | 4 | 4 | 1 | 1 | 4 |
| 3 | 4 | 2 | 4 | 4 | 3 | 1 | 1 | 3 |
| 4 | 4 | 4 | 4 | 3 | 3 | 1 | 3 | 3 |
| 2 | 3 | 2 | 3 | 3 | 3 | 2 | 2 | 3 |
| 4 | 4 | 1 | 4 | 4 | 1 | 1 | 4 | 4 |
| 4 | 4 | 4 | 4 | 4 | 4 | 4 | 4 | 4 |
| 3 | 2 | 3 | 1 | 2 | 2 | 3 | 1 | 3 |
| 2 | 2 | 4 | 2 | 2 | 2 | 3 | 1 | 2 |
| 3 | 3 | 1 | 2 | 3 | 3 | 3 | 1 | 3 |
| 2 | 2 | 1 | 2 | 2 | 2 | 2 | 2 | 2 |
| 1 | 2 | 3 | 2 | 3 | 1 | 1 | 1 | 3 |
| 2 | 2 | 1 | 2 | 3 | 4 | 4 | 1 | 2 |
| 1 | 4 | 1 | 4 | 4 | 1 | 1 | 1 | 4 |
| 4 | 4 | 4 | 4 | 4 | 4 | 4 | 1 | 4 |
| 1 | 4 | 2 | 4 | 1 | 4 | 1 | 1 | 1 |
| 3 | 3 | 1 | 3 | 3 | 3 | 3 | 3 | 3 |
| 2 | 2 | 3 | 3 | 3 | 3 | 3 | 1 | 3 |
| 1 | 4 | 1 | 4 | 4 | 3 | 1 | 1 | 4 |
| 1 | 4 | 1 | 3 | 3 | 1 | 2 | 2 | 3 |
| 1 | 1 | 1 | 1 | 1 | 1 | 1 | 1 | 1 |
| 1 | 2 | 1 | 4 | 4 | 1 | 1 | 1 | 1 |
| 1 | 2 | 1 | 4 | 4 | 1 | 1 | 1 | 4 |
| 2 | 2 | 2 | 2 | 2 | 2 | 2 | 2 | 2 |
| 2 | 4 | 1 | 4 | 4 | 4 | 4 | 3 | 4 |
| 3 | 2 | 3 | 2 | 2 | 3 | 1 | 1 | 1 |
| 4 | 4 | 4 | 1 | 1 | 2 | 3 | 1 | 4 |
| 4 | 3 | 4 | 3 | 3 | 4 | 4 | 2 | 2 |
| 1 | 1 | 2 | 1 | 1 | 1 | 1 | 1 | 1 |
| 2 | 4 | 4 | 3 | 4 | 4 | 1 | 3 | 4 |
| 4 | 3 | 4 | 1 | 1 | 3 | 4 | 1 | 1 |
| 2 | 4 | 3 | 4 | 4 | 4 | 2 | 2 | 3 |
| 1 | 4 | 3 | 4 | 2 | 1 | 2 | 1 | 4 |
| 3 | 3 | 4 | 2 | 3 | 4 | 3 | 1 | 3 |
| 2 | 2 | 1 | 4 | 3 | 2 | 1 | 1 | 2 |
| 4 | 3 | 4 | 4 | 4 | 4 | 4 | 4 | 4 |
| 4 | 4 | 3 | 3 | 3 | 1 | 2 | 1 | 3 |
| 1 | 4 | 1 | 3 | 4 | 3 | 1 | 1 | 4 |

|   |   |   |   |   |   |   |   |   |
|---|---|---|---|---|---|---|---|---|
| 1 | 4 | 3 | 3 | 3 | 1 | 2 | 1 | 3 |
| 2 | 3 | 2 | 2 | 3 | 2 | 1 | 1 | 3 |
| 3 | 4 | 3 | 4 | 4 | 4 | 2 | 4 | 4 |
| 2 | 3 | 3 | 3 | 3 | 3 | 2 | 2 | 3 |
| 3 | 3 | 1 | 4 | 1 | 3 | 1 | 2 | 1 |
| 3 | 4 | 2 | 4 | 4 | 3 | 2 | 2 | 3 |
| 1 | 3 | 2 | 4 | 4 | 2 | 1 | 1 | 4 |
| 1 | 3 | 1 | 3 | 4 | 3 | 1 | 1 | 4 |
| 4 | 4 | 4 | 2 | 2 | 3 | 4 | 4 | 2 |
| 4 | 4 | 4 | 1 | 1 | 4 | 1 | 4 | 1 |
| 2 | 4 | 3 | 4 | 4 | 4 | 2 | 1 | 4 |
| 2 | 3 | 3 | 3 | 2 | 2 | 2 | 2 | 2 |
| 2 | 3 | 2 | 3 | 3 | 2 | 2 | 2 | 3 |
| 1 | 4 | 1 | 4 | 4 | 1 | 1 | 1 | 4 |
| 3 | 3 | 2 | 2 | 2 | 2 | 2 | 2 | 3 |
| 3 | 4 | 3 | 3 | 3 | 1 | 1 | 1 | 4 |
| 2 | 2 | 2 | 2 | 3 | 3 | 1 | 2 | 4 |
| 2 | 3 | 2 | 2 | 3 | 2 | 1 | 3 | 3 |
| 4 | 4 | 4 | 4 | 4 | 4 | 4 | 4 | 4 |
| 1 | 1 | 1 | 3 | 1 | 2 | 2 | 1 | 1 |
| 1 | 4 | 1 | 4 | 4 | 4 | 1 | 1 | 4 |
| 1 | 3 | 4 | 3 | 4 | 3 | 2 | 2 | 4 |
| 2 | 4 | 2 | 2 | 2 | 3 | 1 | 3 | 4 |
| 1 | 1 | 2 | 4 | 3 | 1 | 1 | 1 | 3 |
| 1 | 1 | 4 | 4 | 2 | 2 | 2 | 2 | 2 |
| 2 | 2 | 1 | 1 | 3 | 2 | 2 | 1 | 2 |
| 2 | 3 | 2 | 2 | 3 | 2 | 2 | 1 | 3 |
| 4 | 4 | 4 | 4 | 4 | 4 | 4 | 4 | 4 |
| 2 | 2 | 4 | 2 | 2 | 3 | 2 | 1 | 1 |
| 1 | 3 | 1 | 4 | 4 | 4 | 1 | 4 | 4 |
| 2 | 3 | 2 | 2 | 2 | 2 | 2 | 2 | 2 |
| 1 | 4 | 1 | 3 | 4 | 1 | 1 | 1 | 4 |
| 1 | 3 | 1 | 4 | 4 | 1 | 1 | 1 | 3 |
| 2 | 4 | 4 | 3 | 4 | 1 | 3 | 1 | 4 |
| 2 | 3 | 3 | 4 | 4 | 4 | 1 | 2 | 4 |
| 2 | 3 | 3 | 3 | 3 | 2 | 2 | 2 | 3 |
| 1 | 3 | 1 | 4 | 1 | 1 | 1 | 1 | 1 |
| 2 | 3 | 2 | 3 | 3 | 3 | 3 | 1 | 3 |
| 2 | 3 | 2 | 3 | 3 | 2 | 2 | 2 | 3 |
| 3 | 4 | 2 | 4 | 4 | 4 | 2 | 3 | 3 |
| 4 | 4 | 4 | 4 | 4 | 4 | 4 | 4 | 4 |
| 3 | 3 | 3 | 3 | 3 | 3 | 3 | 3 | 3 |
| 4 | 4 | 2 | 4 | 4 | 3 | 4 | 2 | 4 |
| 1 | 3 | 2 | 2 | 3 | 2 | 1 | 1 | 3 |
| 3 | 2 | 2 | 2 | 3 | 3 | 2 | 2 | 3 |
| 1 | 3 | 3 | 3 | 3 | 2 | 2 | 1 | 3 |
| 4 | 4 | 4 | 4 | 4 | 4 | 4 | 4 | 4 |
| 1 | 4 | 1 | 4 | 1 | 1 | 1 | 1 | 1 |
| 2 | 4 | 1 | 4 | 4 | 3 | 4 | 3 | 4 |
| 1 | 4 | 1 | 4 | 4 | 2 | 2 | 1 | 4 |
| 1 | 4 | 3 | 4 | 4 | 3 | 2 | 4 | 3 |
| 1 | 3 | 2 | 1 | 3 | 1 | 1 | 1 | 3 |
| 1 | 4 | 4 | 4 | 4 | 4 | 1 | 4 | 4 |
| 2 | 4 | 3 | 3 | 3 | 2 | 3 | 1 | 3 |

|   |   |   |   |   |   |   |   |   |
|---|---|---|---|---|---|---|---|---|
| 3 | 3 | 3 | 3 | 3 | 3 | 3 | 3 | 3 |
| 4 | 4 | 1 | 4 | 4 | 4 | 1 | 1 | 4 |
| 3 | 4 | 1 | 4 | 4 | 1 | 1 | 1 | 4 |
| 2 | 3 | 2 | 3 | 3 | 2 | 2 | 2 | 2 |
| 4 | 4 | 2 | 4 | 4 | 2 | 2 | 1 | 4 |
| 4 | 4 | 4 | 4 | 4 | 4 | 4 | 4 | 4 |
| 4 | 4 | 4 | 4 | 4 | 4 | 4 | 4 | 4 |
| 3 | 4 | 3 | 4 | 4 | 1 | 1 | 2 | 4 |
| 2 | 4 | 1 | 4 | 4 | 1 | 3 | 1 | 3 |
| 3 | 3 | 4 | 3 | 3 | 1 | 3 | 1 | 3 |
| 4 | 4 | 3 | 4 | 4 | 4 | 2 | 1 | 4 |
| 4 | 4 | 4 | 4 | 4 | 4 | 4 | 4 | 4 |
| 3 | 4 | 3 | 4 | 4 | 1 | 1 | 2 | 4 |
| 4 | 2 | 1 | 3 | 3 | 1 | 1 | 1 | 3 |
| 3 | 3 | 4 | 4 | 4 | 4 | 1 | 1 | 4 |
| 3 | 4 | 4 | 4 | 3 | 1 | 3 | 4 | 4 |
| 3 | 3 | 3 | 3 | 3 | 3 | 3 | 3 | 3 |
| 3 | 3 | 3 | 3 | 3 | 3 | 3 | 3 | 3 |
| 2 | 4 | 3 | 2 | 3 | 2 | 3 | 3 | 3 |
| 4 | 2 | 3 | 3 | 2 | 2 | 3 | 3 | 2 |
| 3 | 3 | 3 | 3 | 3 | 3 | 3 | 3 | 3 |
| 4 | 2 | 1 | 4 | 2 | 4 | 4 | 4 | 4 |
| 2 | 4 | 3 | 4 | 4 | 1 | 1 | 1 | 4 |
| 3 | 2 | 1 | 1 | 1 | 4 | 2 | 1 | 1 |
| 3 | 4 | 2 | 4 | 4 | 4 | 2 | 2 | 3 |
| 2 | 2 | 4 | 4 | 3 | 4 | 2 | 3 | 3 |
| 2 | 2 | 2 | 2 | 2 | 2 | 2 | 2 | 2 |
| 4 | 4 | 2 | 4 | 4 | 4 | 3 | 4 | 4 |
| 4 | 4 | 4 | 4 | 4 | 4 | 4 | 4 | 4 |
| 1 | 4 | 2 | 3 | 4 | 3 | 1 | 1 | 3 |
| 2 | 2 | 2 | 2 | 2 | 2 | 2 | 2 | 2 |
| 4 | 4 | 4 | 4 | 1 | 1 | 4 | 1 | 1 |
| 3 | 3 | 1 | 3 | 3 | 3 | 3 | 3 | 1 |
| 4 | 4 | 4 | 4 | 4 | 4 | 4 | 4 | 4 |
| 2 | 2 | 3 | 3 | 4 | 2 | 1 | 1 | 4 |
| 2 | 4 | 3 | 3 | 4 | 3 | 1 | 2 | 4 |
| 2 | 4 | 1 | 4 | 4 | 1 | 1 | 2 | 3 |
| 2 | 3 | 2 | 4 | 4 | 4 | 1 | 2 | 4 |
| 4 | 4 | 4 | 4 | 4 | 4 | 4 | 4 | 4 |
| 4 | 1 | 1 | 4 | 4 | 1 | 1 | 1 | 4 |
| 3 | 4 | 1 | 4 | 4 | 4 | 3 | 4 | 4 |
| 3 | 4 | 3 | 4 | 4 | 3 | 3 | 3 | 4 |
| 4 | 3 | 2 | 4 | 2 | 2 | 3 | 2 | 3 |
| 1 | 4 | 1 | 4 | 4 | 4 | 1 | 1 | 4 |
| 4 | 1 | 3 | 2 | 3 | 4 | 4 | 3 | 3 |
| 2 | 3 | 1 | 2 | 3 | 1 | 1 | 1 | 4 |
| 2 | 3 | 1 | 3 | 3 | 2 | 2 | 2 | 3 |
| 3 | 3 | 2 | 4 | 4 | 2 | 2 | 2 | 3 |
| 4 | 4 | 4 | 3 | 4 | 3 | 4 | 4 | 4 |
| 3 | 3 | 1 | 3 | 4 | 2 | 3 | 2 | 3 |
| 3 | 3 | 1 | 3 | 4 | 2 | 3 | 2 | 3 |
| 4 | 4 | 2 | 2 | 4 | 4 | 1 | 1 | 4 |
| 1 | 3 | 1 | 3 | 3 | 3 | 1 | 1 | 3 |
| 2 | 2 | 3 | 3 | 3 | 2 | 2 | 2 | 2 |

|   |   |   |   |   |   |   |   |   |
|---|---|---|---|---|---|---|---|---|
| 1 | 4 | 2 | 4 | 4 | 1 | 1 | 1 | 4 |
| 2 | 3 | 2 | 3 | 2 | 1 | 1 | 1 | 3 |
| 2 | 4 | 1 | 2 | 4 | 1 | 1 | 1 | 4 |
| 3 | 3 | 2 | 3 | 3 | 3 | 2 | 3 | 3 |
| 4 | 4 | 4 | 4 | 4 | 4 | 4 | 4 | 4 |
| 2 | 3 | 3 | 3 | 3 | 3 | 2 | 2 | 2 |
| 3 | 3 | 3 | 3 | 3 | 3 | 3 | 3 | 3 |
| 3 | 3 | 1 | 1 | 4 | 2 | 3 | 2 | 3 |
| 4 | 2 | 2 | 2 | 4 | 1 | 2 | 1 | 2 |
| 3 | 3 | 1 | 2 | 3 | 2 | 3 | 2 | 2 |
| 1 | 4 | 2 | 2 | 3 | 1 | 1 | 1 | 3 |
| 4 | 4 | 4 | 3 | 4 | 3 | 4 | 4 | 4 |
| 4 | 4 | 1 | 4 | 4 | 3 | 4 | 1 | 4 |
| 1 | 1 | 1 | 2 | 2 | 1 | 1 | 1 | 1 |
| 1 | 2 | 2 | 4 | 4 | 4 | 1 | 2 | 4 |
| 3 | 3 | 3 | 3 | 3 | 3 | 3 | 3 | 3 |
| 4 | 4 | 4 | 4 | 4 | 4 | 4 | 1 | 4 |
| 1 | 1 | 1 | 4 | 4 | 2 | 1 | 1 | 3 |
| 2 | 3 | 1 | 4 | 1 | 1 | 1 | 1 | 1 |
| 3 | 2 | 2 | 2 | 3 | 2 | 3 | 2 | 3 |
| 3 | 3 | 1 | 3 | 3 | 2 | 4 | 3 | 3 |
| 2 | 2 | 1 | 2 | 1 | 1 | 2 | 1 | 2 |
| 1 | 4 | 3 | 4 | 4 | 1 | 3 | 1 | 4 |
| 2 | 3 | 3 | 2 | 2 | 2 | 3 | 2 | 3 |
| 3 | 3 | 3 | 3 | 3 | 3 | 3 | 3 | 3 |
| 1 | 4 | 3 | 3 | 4 | 1 | 1 | 1 | 4 |
| 2 | 2 | 3 | 2 | 2 | 2 | 3 | 3 | 2 |
| 2 | 2 | 3 | 3 | 3 | 4 | 3 | 3 | 3 |
| 1 | 4 | 4 | 1 | 4 | 4 | 2 | 3 | 3 |
| 1 | 4 | 1 | 4 | 4 | 1 | 2 | 1 | 4 |
| 1 | 3 | 3 | 3 | 1 | 1 | 1 | 1 | 1 |
| 2 | 4 | 1 | 4 | 3 | 1 | 1 | 1 | 2 |
| 1 | 3 | 4 | 1 | 1 | 1 | 1 | 1 | 1 |
| 2 | 4 | 3 | 2 | 3 | 2 | 3 | 3 | 3 |
| 2 | 3 | 2 | 3 | 3 | 2 | 2 | 1 | 3 |
| 3 | 3 | 3 | 3 | 3 | 3 | 3 | 3 | 3 |
| 2 | 4 | 1 | 4 | 4 | 4 | 1 | 1 | 4 |
| 2 | 3 | 2 | 4 | 4 | 3 | 1 | 2 | 4 |
| 3 | 3 | 1 | 2 | 3 | 3 | 3 | 3 | 3 |
| 3 | 3 | 2 | 3 | 3 | 2 | 3 | 3 | 3 |
| 3 | 3 | 2 | 3 | 3 | 3 | 2 | 3 | 3 |
| 2 | 3 | 3 | 4 | 4 | 3 | 2 | 2 | 4 |
| 1 | 3 | 1 | 3 | 3 | 2 | 1 | 1 | 2 |
| 3 | 3 | 3 | 3 | 3 | 3 | 3 | 3 | 3 |
| 3 | 3 | 2 | 3 | 3 | 3 | 3 | 3 | 3 |
| 2 | 3 | 4 | 2 | 2 | 3 | 2 | 2 | 2 |
| 2 | 3 | 3 | 3 | 3 | 3 | 3 | 3 | 3 |
| 1 | 3 | 1 | 3 | 1 | 3 | 1 | 1 | 1 |
| 2 | 2 | 2 | 2 | 3 | 2 | 1 | 1 | 3 |
| 3 | 2 | 3 | 2 | 3 | 4 | 3 | 3 | 3 |
| 2 | 2 | 3 | 3 | 3 | 2 | 1 | 2 | 3 |
| 1 | 4 | 2 | 2 | 4 | 1 | 1 | 1 | 3 |
| 4 | 3 | 3 | 1 | 3 | 2 | 1 | 1 | 2 |
| 3 | 2 | 4 | 3 | 2 | 3 | 3 | 2 | 2 |



|   |   |   |   |   |   |   |   |   |
|---|---|---|---|---|---|---|---|---|
| 2 | 3 | 1 | 2 | 3 | 2 | 1 | 1 | 3 |
| 1 | 3 | 1 | 4 | 4 | 4 | 1 | 4 | 4 |
| 3 | 3 | 2 | 3 | 3 | 2 | 3 | 3 | 3 |
| 1 | 1 | 3 | 3 | 3 | 2 | 1 | 1 | 3 |
| 2 | 2 | 2 | 2 | 3 | 2 | 2 | 2 | 3 |
| 1 | 4 | 1 | 4 | 4 | 4 | 1 | 4 | 4 |
| 1 | 3 | 2 | 3 | 2 | 1 | 1 | 1 | 3 |
| 2 | 3 | 2 | 3 | 4 | 3 | 2 | 1 | 4 |
| 1 | 3 | 1 | 3 | 4 | 4 | 1 | 1 | 4 |
| 2 | 3 | 3 | 3 | 4 | 1 | 1 | 1 | 4 |
| 2 | 3 | 2 | 3 | 3 | 3 | 3 | 3 | 3 |
| 4 | 3 | 4 | 3 | 3 | 2 | 4 | 2 | 3 |
| 2 | 3 | 3 | 3 | 3 | 2 | 2 | 3 | 3 |
| 1 | 3 | 1 | 2 | 3 | 2 | 2 | 1 | 4 |
| 1 | 3 | 1 | 2 | 2 | 4 | 1 | 1 | 3 |
| 2 | 4 | 3 | 3 | 4 | 4 | 1 | 1 | 4 |
| 1 | 3 | 2 | 3 | 3 | 2 | 1 | 2 | 4 |
| 1 | 2 | 3 | 2 | 3 | 4 | 3 | 2 | 3 |
| 4 | 4 | 1 | 4 | 4 | 4 | 4 | 4 | 4 |
| 4 | 4 | 3 | 4 | 4 | 4 | 4 | 4 | 4 |
| 2 | 2 | 2 | 3 | 3 | 3 | 2 | 2 | 2 |
| 1 | 2 | 1 | 1 | 4 | 1 | 1 | 1 | 4 |
| 3 | 3 | 2 | 3 | 3 | 3 | 2 | 2 | 2 |
| 2 | 4 | 2 | 4 | 4 | 2 | 2 | 2 | 4 |
| 4 | 2 | 4 | 4 | 4 | 4 | 3 | 1 | 1 |
| 1 | 1 | 2 | 2 | 1 | 2 | 1 | 1 | 2 |
| 2 | 4 | 3 | 3 | 3 | 2 | 1 | 1 | 4 |
| 4 | 4 | 2 | 4 | 4 | 4 | 4 | 1 | 4 |
| 1 | 2 | 4 | 4 | 4 | 4 | 1 | 2 | 2 |
| 4 | 3 | 4 | 4 | 4 | 3 | 3 | 2 | 4 |
| 3 | 3 | 2 | 3 | 3 | 3 | 1 | 1 | 3 |
| 3 | 3 | 2 | 2 | 2 | 2 | 3 | 3 | 3 |
| 2 | 3 | 4 | 4 | 3 | 3 | 2 | 3 | 2 |
| 1 | 2 | 1 | 2 | 2 | 1 | 1 | 1 | 3 |
| 3 | 3 | 1 | 3 | 3 | 3 | 2 | 1 | 3 |
| 4 | 4 | 1 | 1 | 4 | 1 | 1 | 1 | 4 |
| 4 | 4 | 3 | 3 | 4 | 4 | 4 | 4 | 2 |
| 3 | 3 | 2 | 3 | 4 | 2 | 3 | 3 | 3 |
| 2 | 2 | 2 | 2 | 4 | 2 | 1 | 1 | 1 |
| 3 | 3 | 4 | 3 | 4 | 3 | 3 | 3 | 4 |
| 1 | 4 | 1 | 3 | 4 | 4 | 1 | 2 | 4 |
| 2 | 2 | 2 | 3 | 4 | 2 | 2 | 2 | 3 |
| 2 | 2 | 2 | 1 | 3 | 1 | 3 | 1 | 4 |
| 2 | 3 | 1 | 3 | 3 | 3 | 1 | 2 | 3 |
| 3 | 3 | 3 | 3 | 3 | 3 | 3 | 3 | 3 |
| 2 | 3 | 3 | 3 | 4 | 3 | 2 | 2 | 4 |
| 1 | 3 | 1 | 3 | 3 | 1 | 2 | 1 | 3 |
| 4 | 4 | 3 | 4 | 4 | 4 | 4 | 3 | 3 |
| 4 | 4 | 4 | 4 | 4 | 4 | 4 | 4 | 4 |
| 1 | 3 | 3 | 3 | 4 | 1 | 1 | 1 | 3 |
| 3 | 3 | 3 | 3 | 3 | 3 | 3 | 3 | 3 |
| 2 | 4 | 2 | 3 | 2 | 1 | 1 | 1 | 4 |
| 1 | 3 | 1 | 1 | 4 | 3 | 1 | 1 | 4 |
| 1 | 3 | 1 | 3 | 4 | 3 | 2 | 2 | 4 |

|   |   |   |   |   |   |   |   |   |
|---|---|---|---|---|---|---|---|---|
| 4 | 3 | 2 | 4 | 4 | 2 | 1 | 1 | 4 |
| 4 | 3 | 1 | 4 | 4 | 1 | 3 | 1 | 4 |
| 2 | 4 | 2 | 3 | 3 | 3 | 3 | 3 | 3 |
| 2 | 2 | 2 | 3 | 3 | 2 | 2 | 1 | 3 |
| 4 | 1 | 4 | 2 | 1 | 1 | 3 | 1 | 1 |
| 1 | 3 | 1 | 3 | 4 | 1 | 1 | 1 | 4 |
| 1 | 3 | 2 | 3 | 4 | 3 | 1 | 1 | 3 |
| 2 | 4 | 2 | 3 | 2 | 1 | 1 | 1 | 4 |
| 2 | 4 | 1 | 4 | 4 | 4 | 2 | 4 | 3 |
| 4 | 4 | 4 | 4 | 4 | 4 | 4 | 4 | 4 |
| 1 | 3 | 2 | 4 | 4 | 4 | 1 | 1 | 4 |
| 1 | 3 | 1 | 4 | 2 | 1 | 1 | 4 | 4 |
| 4 | 3 | 1 | 4 | 2 | 1 | 1 | 1 | 2 |
| 1 | 1 | 1 | 1 | 3 | 2 | 2 | 1 | 1 |
| 4 | 3 | 2 | 4 | 4 | 1 | 2 | 1 | 4 |
| 1 | 4 | 1 | 4 | 4 | 3 | 1 | 1 | 4 |
| 3 | 3 | 3 | 3 | 3 | 3 | 3 | 3 | 3 |
| 3 | 4 | 1 | 3 | 3 | 3 | 3 | 2 | 3 |
| 2 | 3 | 4 | 2 | 4 | 1 | 1 | 2 | 4 |
| 3 | 3 | 2 | 4 | 4 | 4 | 1 | 2 | 4 |
| 4 | 4 | 3 | 3 | 3 | 3 | 4 | 4 | 4 |
| 3 | 3 | 1 | 3 | 3 | 1 | 2 | 1 | 3 |
| 2 | 3 | 3 | 3 | 3 | 3 | 2 | 1 | 4 |
| 1 | 3 | 1 | 3 | 3 | 1 | 1 | 1 | 3 |
| 2 | 3 | 2 | 3 | 4 | 4 | 2 | 2 | 4 |
| 4 | 4 | 1 | 4 | 4 | 4 | 4 | 1 | 4 |
| 1 | 3 | 1 | 4 | 3 | 1 | 1 | 3 | 3 |
| 2 | 3 | 2 | 2 | 3 | 2 | 2 | 1 | 3 |
| 4 | 4 | 4 | 4 | 4 | 4 | 4 | 4 | 4 |
| 3 | 3 | 2 | 2 | 3 | 3 | 3 | 2 | 3 |
| 3 | 3 | 2 | 3 | 4 | 3 | 2 | 1 | 4 |
| 1 | 4 | 1 | 4 | 4 | 4 | 4 | 1 | 4 |
| 2 | 2 | 4 | 2 | 3 | 3 | 2 | 2 | 4 |
| 1 | 3 | 2 | 3 | 3 | 2 | 1 | 1 | 3 |
| 1 | 4 | 1 | 4 | 1 | 2 | 1 | 4 | 1 |
| 3 | 3 | 4 | 3 | 3 | 3 | 3 | 2 | 3 |
| 1 | 4 | 1 | 4 | 3 | 3 | 1 | 1 | 3 |
| 3 | 2 | 3 | 3 | 3 | 3 | 3 | 2 | 2 |
| 3 | 3 | 3 | 3 | 3 | 3 | 3 | 3 | 3 |
| 2 | 4 | 3 | 3 | 3 | 2 | 2 | 2 | 4 |
| 2 | 2 | 4 | 2 | 3 | 3 | 2 | 2 | 2 |
| 4 | 4 | 2 | 2 | 4 | 4 | 4 | 3 | 4 |
| 2 | 3 | 1 | 3 | 4 | 2 | 2 | 2 | 4 |
| 1 | 3 | 1 | 3 | 3 | 2 | 1 | 3 | 3 |
| 3 | 4 | 1 | 4 | 4 | 1 | 1 | 1 | 4 |
| 2 | 3 | 1 | 3 | 3 | 2 | 2 | 2 | 3 |
| 4 | 2 | 1 | 3 | 2 | 2 | 3 | 4 | 2 |
| 2 | 3 | 2 | 4 | 4 | 4 | 1 | 1 | 4 |
| 1 | 4 | 1 | 4 | 4 | 1 | 1 | 1 | 4 |
| 3 | 3 | 3 | 3 | 3 | 3 | 3 | 2 | 3 |
| 1 | 3 | 3 | 1 | 3 | 3 | 3 | 3 | 3 |
| 2 | 4 | 1 | 4 | 2 | 2 | 3 | 1 | 3 |
| 4 | 4 | 2 | 3 | 3 | 4 | 4 | 4 | 4 |
| 4 | 4 | 2 | 1 | 4 | 4 | 4 | 4 | 4 |

|   |   |   |   |   |   |   |   |
|---|---|---|---|---|---|---|---|
| 3 | 3 | 3 | 3 | 3 | 3 | 3 | 3 |
| 2 | 2 | 3 | 2 | 2 | 3 | 2 | 3 |
| 1 | 3 | 1 | 2 | 3 | 2 | 1 | 3 |
| 3 | 2 | 3 | 2 | 3 | 2 | 3 | 2 |
| 2 | 3 | 3 | 3 | 3 | 3 | 2 | 2 |
| 2 | 3 | 2 | 3 | 3 | 2 | 1 | 1 |
| 1 | 3 | 1 | 1 | 3 | 3 | 3 | 1 |
| 2 | 3 | 4 | 2 | 4 | 4 | 2 | 1 |
| 2 | 2 | 4 | 3 | 2 | 3 | 2 | 2 |
| 2 | 2 | 3 | 2 | 2 | 3 | 2 | 2 |
| 2 | 2 | 4 | 3 | 3 | 3 | 2 | 1 |
| 1 | 3 | 2 | 3 | 1 | 1 | 1 | 1 |
| 3 | 3 | 3 | 3 | 2 | 2 | 2 | 2 |
| 1 | 4 | 3 | 3 | 3 | 3 | 1 | 1 |
| 2 | 2 | 2 | 2 | 4 | 2 | 2 | 2 |
| 3 | 3 | 4 | 2 | 3 | 3 | 3 | 2 |
| 3 | 3 | 4 | 2 | 2 | 3 | 3 | 3 |
| 2 | 3 | 1 | 3 | 3 | 1 | 1 | 1 |
| 1 | 3 | 3 | 3 | 4 | 1 | 1 | 1 |
| 3 | 3 | 2 | 3 | 4 | 4 | 4 | 2 |
| 4 | 3 | 2 | 4 | 4 | 1 | 2 | 1 |
| 3 | 3 | 3 | 2 | 3 | 3 | 3 | 1 |
| 2 | 2 | 2 | 2 | 2 | 2 | 2 | 2 |
| 3 | 2 | 4 | 3 | 3 | 4 | 2 | 2 |
| 3 | 3 | 1 | 4 | 3 | 3 | 2 | 1 |
| 4 | 4 | 4 | 1 | 4 | 4 | 1 | 1 |
| 2 | 3 | 3 | 2 | 3 | 1 | 2 | 1 |
| 3 | 3 | 2 | 3 | 3 | 3 | 2 | 3 |
| 4 | 2 | 4 | 2 | 3 | 4 | 4 | 4 |
| 1 | 2 | 2 | 3 | 4 | 3 | 3 | 1 |
| 4 | 4 | 4 | 4 | 4 | 4 | 4 | 4 |
| 2 | 2 | 2 | 2 | 2 | 2 | 2 | 2 |
| 4 | 4 | 2 | 4 | 4 | 4 | 4 | 4 |
| 3 | 3 | 3 | 3 | 3 | 3 | 3 | 3 |
| 2 | 3 | 2 | 3 | 2 | 2 | 2 | 2 |
| 4 | 4 | 4 | 4 | 4 | 4 | 4 | 4 |
| 4 | 4 | 4 | 4 | 4 | 4 | 4 | 4 |
| 1 | 3 | 1 | 3 | 3 | 4 | 1 | 1 |
| 3 | 3 | 3 | 3 | 4 | 4 | 3 | 3 |
| 1 | 3 | 3 | 3 | 1 | 1 | 1 | 1 |
| 2 | 4 | 4 | 4 | 4 | 4 | 4 | 3 |
| 2 | 2 | 3 | 3 | 3 | 3 | 3 | 3 |
| 1 | 4 | 3 | 4 | 3 | 1 | 3 | 3 |
| 2 | 3 | 2 | 3 | 3 | 2 | 2 | 2 |
| 3 | 3 | 3 | 3 | 3 | 3 | 3 | 3 |
| 2 | 3 | 4 | 3 | 3 | 3 | 3 | 1 |
| 3 | 3 | 2 | 3 | 3 | 3 | 3 | 3 |
| 2 | 3 | 2 | 2 | 2 | 3 | 2 | 2 |
| 2 | 3 | 2 | 3 | 2 | 2 | 2 | 2 |
| 4 | 4 | 4 | 4 | 4 | 4 | 4 | 4 |
| 2 | 2 | 2 | 2 | 2 | 2 | 2 | 2 |
| 1 | 2 | 2 | 3 | 2 | 1 | 1 | 2 |
| 2 | 3 | 3 | 3 | 3 | 3 | 2 | 1 |
| 2 | 2 | 2 | 2 | 2 | 2 | 2 | 2 |



|   |   |   |   |   |   |   |   |   |
|---|---|---|---|---|---|---|---|---|
| 1 | 1 | 1 | 1 | 1 | 1 | 1 | 1 | 1 |
| 2 | 4 | 4 | 4 | 4 | 4 | 4 | 4 | 4 |
| 1 | 2 | 1 | 2 | 3 | 2 | 1 | 1 | 4 |
| 2 | 3 | 2 | 3 | 3 | 4 | 4 | 2 | 3 |
| 1 | 4 | 2 | 3 | 4 | 3 | 2 | 1 | 2 |
| 1 | 1 | 1 | 1 | 1 | 1 | 1 | 1 | 1 |
| 4 | 4 | 1 | 4 | 4 | 2 | 1 | 1 | 4 |
| 3 | 3 | 2 | 4 | 3 | 1 | 1 | 1 | 3 |
| 1 | 3 | 2 | 2 | 3 | 2 | 2 | 1 | 3 |
| 4 | 4 | 4 | 3 | 2 | 1 | 3 | 3 | 2 |
| 2 | 3 | 2 | 3 | 3 | 3 | 2 | 2 | 2 |
| 2 | 2 | 2 | 2 | 2 | 2 | 2 | 2 | 2 |
| 1 | 3 | 2 | 3 | 3 | 2 | 2 | 2 | 3 |
| 3 | 3 | 2 | 3 | 3 | 3 | 3 | 3 | 3 |
| 3 | 3 | 3 | 3 | 3 | 3 | 3 | 3 | 3 |
| 3 | 3 | 4 | 2 | 3 | 2 | 3 | 3 | 3 |
| 2 | 2 | 3 | 2 | 3 | 3 | 3 | 2 | 2 |
| 2 | 2 | 2 | 2 | 2 | 2 | 2 | 2 | 3 |
| 3 | 3 | 3 | 3 | 3 | 3 | 2 | 2 | 3 |
| 1 | 3 | 1 | 2 | 3 | 2 | 1 | 1 | 4 |
| 3 | 3 | 1 | 3 | 3 | 3 | 2 | 2 | 3 |
| 2 | 4 | 3 | 2 | 2 | 2 | 2 | 2 | 2 |
| 3 | 3 | 3 | 3 | 3 | 3 | 3 | 3 | 3 |
| 4 | 3 | 4 | 3 | 3 | 3 | 3 | 3 | 3 |
| 2 | 3 | 3 | 3 | 2 | 4 | 4 | 1 | 1 |
| 2 | 3 | 2 | 2 | 4 | 2 | 2 | 2 | 4 |
| 3 | 3 | 3 | 3 | 3 | 3 | 3 | 2 | 3 |
| 3 | 3 | 3 | 2 | 3 | 2 | 1 | 1 | 2 |
| 4 | 4 | 3 | 3 | 4 | 4 | 4 | 4 | 4 |
| 4 | 4 | 4 | 3 | 4 | 4 | 4 | 2 | 4 |
| 1 | 3 | 1 | 2 | 3 | 2 | 1 | 1 | 3 |
| 3 | 4 | 2 | 3 | 2 | 2 | 1 | 2 | 2 |
| 4 | 4 | 4 | 4 | 4 | 4 | 4 | 4 | 4 |
| 3 | 3 | 1 | 2 | 3 | 3 | 2 | 2 | 4 |
| 1 | 3 | 1 | 3 | 4 | 3 | 4 | 2 | 4 |
| 3 | 3 | 2 | 3 | 3 | 3 | 3 | 3 | 3 |
| 2 | 1 | 3 | 2 | 2 | 3 | 2 | 3 | 2 |
| 2 | 2 | 2 | 2 | 2 | 2 | 2 | 2 | 2 |
| 1 | 3 | 1 | 3 | 2 | 2 | 2 | 1 | 3 |
| 2 | 3 | 2 | 3 | 3 | 2 | 2 | 2 | 3 |
| 4 | 4 | 4 | 4 | 4 | 4 | 4 | 4 | 4 |
| 1 | 1 | 1 | 1 | 1 | 1 | 1 | 1 | 1 |
| 2 | 3 | 2 | 3 | 1 | 2 | 1 | 1 | 2 |
| 2 | 2 | 1 | 1 | 3 | 2 | 2 | 1 | 2 |
| 1 | 4 | 1 | 4 | 4 | 4 | 1 | 2 | 4 |
| 3 | 3 | 4 | 1 | 1 | 1 | 4 | 1 | 1 |
| 4 | 4 | 2 | 4 | 2 | 3 | 4 | 4 | 2 |
| 3 | 3 | 3 | 3 | 3 | 3 | 3 | 3 | 3 |
| 4 | 4 | 2 | 4 | 1 | 4 | 4 | 1 | 1 |
| 4 | 2 | 4 | 3 | 3 | 2 | 4 | 2 | 3 |
| 3 | 3 | 4 | 3 | 3 | 3 | 3 | 3 | 3 |
| 2 | 3 | 3 | 2 | 3 | 1 | 1 | 1 | 3 |
| 4 | 4 | 4 | 4 | 4 | 4 | 4 | 4 | 4 |
| 2 | 4 | 1 | 4 | 4 | 2 | 2 | 2 | 4 |

|   |   |   |   |   |   |   |   |   |
|---|---|---|---|---|---|---|---|---|
| 1 | 1 | 1 | 4 | 4 | 1 | 2 | 4 | 1 |
| 3 | 3 | 3 | 3 | 3 | 3 | 3 | 3 | 3 |
| 2 | 3 | 2 | 1 | 2 | 2 | 1 | 1 | 2 |
| 2 | 3 | 2 | 3 | 3 | 3 | 2 | 3 | 3 |
| 4 | 4 | 4 | 4 | 4 | 4 | 4 | 4 | 4 |
| 1 | 4 | 1 | 4 | 4 | 1 | 1 | 4 | 3 |
| 1 | 2 | 2 | 1 | 1 | 1 | 1 | 1 | 1 |
| 3 | 3 | 3 | 3 | 3 | 3 | 3 | 3 | 3 |
| 4 | 4 | 1 | 3 | 4 | 4 | 4 | 4 | 4 |
| 1 | 4 | 1 | 4 | 4 | 1 | 1 | 1 | 4 |
| 3 | 2 | 3 | 2 | 3 | 3 | 2 | 3 | 2 |
| 3 | 3 | 3 | 3 | 3 | 3 | 3 | 3 | 3 |
| 2 | 3 | 3 | 2 | 3 | 2 | 3 | 2 | 3 |
| 4 | 4 | 4 | 4 | 4 | 4 | 4 | 4 | 4 |
| 4 | 3 | 4 | 3 | 4 | 4 | 4 | 4 | 3 |
| 2 | 3 | 2 | 4 | 3 | 2 | 2 | 2 | 3 |
| 1 | 4 | 1 | 4 | 2 | 1 | 1 | 1 | 2 |
| 4 | 4 | 1 | 4 | 4 | 4 | 4 | 4 | 4 |
| 1 | 2 | 2 | 2 | 2 | 2 | 3 | 1 | 2 |
| 1 | 2 | 1 | 4 | 2 | 1 | 1 | 1 | 2 |
| 4 | 1 | 1 | 2 | 3 | 2 | 3 | 3 | 1 |
| 2 | 3 | 1 | 3 | 4 | 3 | 1 | 2 | 4 |
| 2 | 4 | 2 | 3 | 4 | 3 | 2 | 3 | 3 |
| 3 | 3 | 3 | 3 | 3 | 3 | 3 | 3 | 3 |
| 2 | 4 | 1 | 4 | 4 | 3 | 1 | 3 | 4 |
| 1 | 4 | 1 | 4 | 4 | 1 | 1 | 2 | 4 |
| 1 | 4 | 3 | 4 | 4 | 1 | 1 | 1 | 4 |
| 1 | 3 | 3 | 3 | 2 | 1 | 3 | 1 | 2 |
| 3 | 4 | 2 | 2 | 3 | 2 | 2 | 2 | 3 |
| 1 | 2 | 1 | 4 | 2 | 1 | 1 | 1 | 2 |
| 1 | 4 | 3 | 2 | 3 | 3 | 2 | 1 | 4 |
| 4 | 4 | 3 | 4 | 4 | 3 | 1 | 1 | 4 |
| 1 | 4 | 1 | 1 | 4 | 4 | 1 | 4 | 4 |
| 1 | 4 | 2 | 4 | 4 | 3 | 2 | 3 | 4 |
| 4 | 3 | 3 | 3 | 3 | 2 | 3 | 1 | 4 |
| 2 | 2 | 1 | 4 | 1 | 1 | 1 | 1 | 1 |
| 3 | 3 | 2 | 4 | 4 | 4 | 4 | 1 | 4 |
| 1 | 4 | 1 | 4 | 4 | 4 | 1 | 1 | 4 |
| 4 | 4 | 1 | 4 | 4 | 1 | 1 | 4 | 4 |
| 3 | 3 | 3 | 3 | 3 | 1 | 1 | 1 | 3 |
| 2 | 3 | 1 | 3 | 3 | 3 | 2 | 2 | 3 |
| 1 | 4 | 1 | 4 | 4 | 4 | 1 | 1 | 4 |
| 1 | 1 | 1 | 4 | 4 | 4 | 1 | 1 | 4 |
| 2 | 4 | 2 | 4 | 3 | 2 | 1 | 1 | 3 |
| 1 | 1 | 1 | 1 | 1 | 1 | 1 | 1 | 1 |
| 4 | 4 | 4 | 4 | 4 | 4 | 4 | 4 | 4 |
| 1 | 1 | 1 | 4 | 4 | 1 | 2 | 4 | 1 |
| 2 | 4 | 2 | 4 | 4 | 1 | 1 | 2 | 4 |
| 2 | 2 | 3 | 3 | 3 | 3 | 3 | 3 | 3 |
| 1 | 3 | 1 | 3 | 4 | 4 | 1 | 1 | 4 |
| 2 | 3 | 2 | 3 | 2 | 3 | 2 | 3 | 2 |
| 4 | 4 | 4 | 4 | 4 | 4 | 4 | 4 | 4 |
| 1 | 3 | 2 | 3 | 3 | 2 | 1 | 3 | 4 |
| 4 | 3 | 2 | 4 | 4 | 2 | 2 | 1 | 4 |

|   |   |   |   |   |   |   |   |   |
|---|---|---|---|---|---|---|---|---|
| 1 | 3 | 2 | 2 | 3 | 1 | 1 | 1 | 4 |
| 1 | 4 | 1 | 3 | 3 | 2 | 3 | 2 | 3 |
| 1 | 3 | 1 | 4 | 4 | 1 | 1 | 1 | 4 |
| 4 | 4 | 3 | 3 | 3 | 3 | 3 | 2 | 2 |
| 4 | 4 | 2 | 4 | 4 | 4 | 4 | 4 | 4 |
| 1 | 4 | 1 | 4 | 4 | 4 | 1 | 4 | 4 |
| 4 | 3 | 4 | 4 | 4 | 3 | 4 | 3 | 3 |
| 1 | 4 | 1 | 1 | 4 | 4 | 4 | 4 | 4 |
| 2 | 4 | 2 | 4 | 4 | 2 | 3 | 1 | 4 |
| 4 | 4 | 4 | 4 | 4 | 4 | 4 | 4 | 4 |
| 1 | 4 | 1 | 4 | 2 | 4 | 1 | 1 | 1 |
| 2 | 2 | 4 | 4 | 4 | 2 | 3 | 1 | 4 |
| 1 | 4 | 1 | 4 | 2 | 4 | 1 | 1 | 1 |
| 4 | 4 | 4 | 4 | 4 | 4 | 4 | 4 | 4 |
| 1 | 3 | 4 | 3 | 3 | 3 | 2 | 3 | 3 |
| 4 | 4 | 3 | 4 | 4 | 1 | 1 | 3 | 3 |
| 1 | 3 | 4 | 3 | 3 | 3 | 2 | 3 | 3 |
| 1 | 3 | 1 | 4 | 4 | 1 | 2 | 1 | 4 |
| 1 | 3 | 2 | 3 | 3 | 1 | 1 | 1 | 3 |
| 2 | 3 | 3 | 3 | 2 | 2 | 2 | 2 | 3 |
| 1 | 3 | 1 | 3 | 1 | 1 | 1 | 1 | 1 |
| 3 | 3 | 3 | 3 | 3 | 3 | 3 | 3 | 3 |
| 4 | 4 | 4 | 4 | 4 | 4 | 4 | 4 | 4 |
| 1 | 4 | 1 | 4 | 4 | 4 | 4 | 4 | 4 |
| 2 | 2 | 2 | 2 | 2 | 2 | 2 | 2 | 2 |
| 3 | 3 | 3 | 3 | 3 | 3 | 3 | 3 | 3 |
| 2 | 1 | 3 | 2 | 3 | 3 | 2 | 2 | 4 |
| 2 | 3 | 2 | 3 | 3 | 2 | 2 | 2 | 3 |
| 4 | 4 | 2 | 4 | 4 | 4 | 4 | 1 | 4 |
| 2 | 3 | 2 | 3 | 2 | 2 | 3 | 1 | 1 |
| 2 | 2 | 2 | 3 | 3 | 2 | 2 | 2 | 2 |
| 2 | 3 | 3 | 3 | 3 | 3 | 2 | 2 | 2 |
| 1 | 4 | 3 | 4 | 4 | 3 | 1 | 1 | 4 |
| 3 | 3 | 2 | 3 | 3 | 3 | 2 | 3 | 3 |
| 2 | 3 | 3 | 3 | 3 | 3 | 2 | 1 | 4 |
| 3 | 3 | 3 | 3 | 3 | 3 | 3 | 3 | 3 |
| 2 | 2 | 1 | 2 | 2 | 2 | 2 | 2 | 3 |
| 1 | 3 | 2 | 2 | 1 | 2 | 2 | 2 | 2 |
| 2 | 3 | 2 | 3 | 3 | 3 | 2 | 1 | 3 |
| 3 | 3 | 3 | 3 | 3 | 3 | 3 | 3 | 3 |
| 2 | 4 | 2 | 4 | 4 | 4 | 3 | 3 | 4 |
| 2 | 3 | 1 | 3 | 4 | 1 | 1 | 1 | 4 |
| 1 | 3 | 3 | 4 | 4 | 1 | 1 | 1 | 3 |
| 2 | 2 | 2 | 2 | 2 | 2 | 2 | 2 | 2 |
| 4 | 4 | 4 | 4 | 4 | 4 | 4 | 4 | 4 |
| 1 | 4 | 1 | 4 | 4 | 1 | 1 | 4 | 1 |
| 3 | 4 | 2 | 3 | 3 | 2 | 3 | 2 | 3 |
| 2 | 3 | 2 | 3 | 3 | 2 | 2 | 2 | 3 |
| 2 | 3 | 1 | 3 | 3 | 1 | 1 | 1 | 3 |
| 2 | 4 | 2 | 2 | 3 | 2 | 3 | 2 | 2 |
| 1 | 3 | 1 | 3 | 3 | 2 | 2 | 1 | 3 |
| 1 | 3 | 1 | 3 | 1 | 3 | 1 | 1 | 1 |
| 3 | 3 | 3 | 3 | 3 | 3 | 3 | 3 | 3 |
| 2 | 3 | 2 | 3 | 3 | 3 | 2 | 3 | 2 |

|   |   |   |   |   |   |   |   |   |
|---|---|---|---|---|---|---|---|---|
| 3 | 4 | 3 | 4 | 4 | 3 | 1 | 2 | 4 |
| 3 | 2 | 3 | 3 | 2 | 2 | 4 | 2 | 2 |
| 3 | 4 | 3 | 3 | 3 | 3 | 4 | 2 | 3 |
| 2 | 3 | 1 | 3 | 3 | 3 | 1 | 1 | 3 |
| 1 | 4 | 1 | 4 | 1 | 4 | 4 | 1 | 1 |
| 4 | 4 | 1 | 4 | 4 | 1 | 2 | 1 | 4 |
| 1 | 2 | 3 | 3 | 4 | 1 | 2 | 2 | 4 |
| 2 | 1 | 1 | 3 | 3 | 3 | 3 | 3 | 2 |
| 2 | 3 | 3 | 3 | 3 | 3 | 2 | 2 | 3 |
| 2 | 2 | 1 | 2 | 4 | 1 | 1 | 1 | 3 |
| 4 | 4 | 4 | 4 | 4 | 4 | 4 | 4 | 4 |
| 4 | 4 | 4 | 4 | 4 | 4 | 4 | 4 | 4 |
| 2 | 3 | 2 | 2 | 3 | 2 | 2 | 2 | 3 |
| 3 | 3 | 3 | 2 | 2 | 2 | 1 | 3 | 3 |
| 1 | 4 | 1 | 4 | 4 | 1 | 1 | 1 | 4 |
| 2 | 4 | 4 | 4 | 4 | 4 | 4 | 1 | 4 |
| 1 | 3 | 2 | 3 | 3 | 1 | 1 | 1 | 3 |
| 4 | 3 | 3 | 3 | 3 | 3 | 4 | 2 | 2 |
| 2 | 3 | 3 | 3 | 3 | 3 | 3 | 2 | 2 |
| 1 | 3 | 1 | 3 | 3 | 3 | 1 | 1 | 3 |
| 4 | 4 | 4 | 4 | 4 | 4 | 4 | 4 | 4 |
| 3 | 3 | 4 | 3 | 3 | 3 | 3 | 3 | 3 |
| 2 | 3 | 2 | 3 | 3 | 2 | 2 | 2 | 3 |
| 1 | 4 | 1 | 4 | 4 | 2 | 1 | 1 | 4 |
| 4 | 2 | 4 | 2 | 4 | 2 | 3 | 2 | 4 |
| 2 | 3 | 3 | 2 | 4 | 3 | 3 | 3 | 3 |
| 1 | 4 | 1 | 4 | 4 | 4 | 2 | 1 | 4 |
| 4 | 4 | 4 | 4 | 4 | 4 | 4 | 4 | 4 |
| 4 | 2 | 2 | 4 | 4 | 4 | 3 | 4 | 4 |
| 2 | 3 | 1 | 2 | 2 | 2 | 2 | 3 | 1 |
| 1 | 3 | 3 | 2 | 3 | 1 | 1 | 1 | 3 |
| 3 | 3 | 2 | 3 | 3 | 2 | 2 | 2 | 3 |
| 3 | 3 | 3 | 3 | 3 | 3 | 3 | 3 | 3 |
| 2 | 2 | 2 | 2 | 2 | 2 | 2 | 2 | 2 |
| 3 | 1 | 2 | 1 | 3 | 4 | 4 | 1 | 3 |
| 1 | 4 | 1 | 4 | 4 | 2 | 1 | 1 | 4 |
| 3 | 3 | 2 | 3 | 3 | 3 | 3 | 2 | 3 |
| 3 | 4 | 1 | 4 | 2 | 3 | 2 | 1 | 1 |
| 2 | 3 | 3 | 3 | 3 | 2 | 2 | 1 | 3 |
| 2 | 2 | 4 | 2 | 2 | 2 | 2 | 2 | 2 |
| 3 | 3 | 3 | 3 | 3 | 3 | 3 | 3 | 3 |
| 2 | 3 | 3 | 3 | 4 | 1 | 2 | 1 | 4 |
| 4 | 4 | 4 | 4 | 4 | 4 | 4 | 4 | 4 |
| 1 | 3 | 1 | 3 | 3 | 2 | 1 | 1 | 2 |
| 2 | 3 | 2 | 3 | 3 | 3 | 3 | 2 | 3 |
| 2 | 3 | 2 | 3 | 3 | 2 | 2 | 1 | 3 |
| 2 | 3 | 2 | 3 | 3 | 2 | 3 | 2 | 3 |
| 3 | 3 | 2 | 3 | 3 | 3 | 2 | 3 | 3 |
| 1 | 3 | 2 | 1 | 3 | 1 | 1 | 3 | 3 |
| 4 | 4 | 2 | 4 | 4 | 4 | 4 | 4 | 4 |
| 1 | 4 | 1 | 4 | 4 | 2 | 1 | 1 | 4 |
| 1 | 4 | 1 | 3 | 4 | 4 | 1 | 1 | 4 |
| 3 | 3 | 1 | 2 | 1 | 1 | 1 | 1 | 1 |
| 1 | 3 | 1 | 3 | 3 | 2 | 2 | 1 | 3 |

|   |   |   |   |   |   |   |   |   |
|---|---|---|---|---|---|---|---|---|
| 2 | 3 | 2 | 3 | 2 | 2 | 2 | 1 | 2 |
| 2 | 3 | 3 | 3 | 3 | 3 | 3 | 3 | 2 |
| 1 | 2 | 2 | 2 | 2 | 2 | 2 | 2 | 2 |
| 1 | 3 | 1 | 3 | 3 | 1 | 1 | 1 | 3 |
| 3 | 3 | 4 | 3 | 3 | 3 | 3 | 3 | 3 |
| 2 | 3 | 3 | 2 | 2 | 3 | 2 | 2 | 3 |
| 1 | 2 | 1 | 4 | 4 | 1 | 1 | 1 | 1 |
| 4 | 4 | 4 | 4 | 4 | 4 | 4 | 4 | 4 |
| 2 | 3 | 3 | 3 | 3 | 3 | 2 | 2 | 3 |
| 3 | 3 | 2 | 3 | 2 | 3 | 2 | 3 | 3 |
| 3 | 3 | 2 | 3 | 2 | 3 | 2 | 3 | 3 |
| 3 | 3 | 3 | 4 | 4 | 3 | 3 | 4 | 3 |
| 2 | 3 | 2 | 2 | 3 | 1 | 2 | 2 | 3 |
| 1 | 3 | 2 | 3 | 3 | 3 | 1 | 1 | 3 |
| 3 | 4 | 2 | 4 | 4 | 3 | 3 | 3 | 4 |
| 1 | 4 | 1 | 4 | 4 | 1 | 1 | 1 | 4 |
| 1 | 3 | 1 | 3 | 3 | 4 | 1 | 1 | 3 |
| 2 | 4 | 1 | 3 | 1 | 1 | 1 | 1 | 1 |
| 3 | 3 | 3 | 3 | 4 | 3 | 3 | 2 | 4 |
| 2 | 3 | 4 | 3 | 3 | 2 | 1 | 1 | 2 |
| 1 | 4 | 2 | 2 | 4 | 4 | 1 | 3 | 4 |
| 2 | 4 | 1 | 3 | 3 | 3 | 4 | 2 | 3 |
| 1 | 4 | 1 | 4 | 4 | 1 | 1 | 1 | 1 |
| 1 | 4 | 1 | 4 | 4 | 2 | 1 | 1 | 4 |
| 2 | 4 | 1 | 3 | 4 | 2 | 3 | 2 | 3 |
| 2 | 3 | 3 | 1 | 2 | 1 | 1 | 1 | 2 |
| 2 | 3 | 2 | 3 | 2 | 2 | 2 | 2 | 2 |
| 1 | 4 | 3 | 1 | 1 | 1 | 1 | 1 | 1 |
| 3 | 3 | 3 | 3 | 3 | 3 | 3 | 3 | 3 |
| 1 | 4 | 1 | 4 | 4 | 1 | 1 | 4 | 4 |
| 2 | 3 | 1 | 3 | 4 | 4 | 1 | 1 | 4 |
| 1 | 3 | 1 | 3 | 4 | 4 | 1 | 2 | 4 |
| 2 | 1 | 3 | 2 | 2 | 2 | 2 | 2 | 4 |
| 2 | 4 | 1 | 4 | 3 | 4 | 1 | 1 | 3 |
| 2 | 4 | 1 | 3 | 4 | 4 | 1 | 3 | 4 |
| 1 | 2 | 1 | 2 | 3 | 3 | 1 | 3 | 3 |
| 3 | 3 | 3 | 2 | 2 | 2 | 2 | 2 | 3 |
| 2 | 4 | 1 | 4 | 4 | 3 | 2 | 1 | 3 |
| 1 | 4 | 1 | 4 | 4 | 4 | 4 | 4 | 4 |
| 1 | 3 | 2 | 3 | 3 | 2 | 2 | 2 | 3 |
| 1 | 2 | 1 | 1 | 3 | 1 | 1 | 1 | 2 |
| 2 | 3 | 2 | 3 | 2 | 3 | 2 | 3 | 2 |
| 1 | 4 | 1 | 4 | 4 | 1 | 1 | 1 | 4 |
| 3 | 3 | 2 | 3 | 2 | 2 | 1 | 1 | 3 |
| 1 | 2 | 1 | 2 | 3 | 2 | 1 | 1 | 3 |
| 1 | 3 | 2 | 4 | 4 | 1 | 2 | 1 | 3 |
| 1 | 3 | 1 | 1 | 4 | 1 | 1 | 1 | 2 |
| 3 | 3 | 1 | 3 | 4 | 2 | 2 | 4 | 4 |
| 2 | 3 | 1 | 3 | 3 | 2 | 1 | 1 | 3 |
| 2 | 3 | 1 | 3 | 3 | 3 | 2 | 1 | 2 |
| 1 | 4 | 1 | 4 | 4 | 1 | 1 | 1 | 4 |
| 1 | 4 | 1 | 4 | 4 | 1 | 1 | 1 | 3 |
| 2 | 3 | 1 | 2 | 3 | 1 | 2 | 1 | 3 |
| 2 | 3 | 2 | 4 | 3 | 2 | 2 | 3 | 3 |





| A24 | A25 | A26 | A27 | A28 | A29 | A30 | Metacognit B1 |   |
|-----|-----|-----|-----|-----|-----|-----|---------------|---|
| 3   | 2   | 2   | 3   | 3   | 2   | 3   | 84            | 5 |
| 4   | 1   | 3   | 4   | 4   | 4   | 4   | 101           | 5 |
| 2   | 2   | 2   | 3   | 3   | 2   | 2   | 77            | 5 |
| 3   | 2   | 2   | 2   | 3   | 3   | 3   | 73            | 5 |
| 1   | 4   | 1   | 4   | 4   | 1   | 1   | 96            | 5 |
| 2   | 1   | 1   | 2   | 1   | 2   | 3   | 64            | 5 |
| 2   | 1   | 3   | 3   | 4   | 3   | 2   | 77            | 3 |
| 3   | 1   | 3   | 4   | 4   | 3   | 4   | 80            | 2 |
| 4   | 1   | 1   | 1   | 4   | 2   | 4   | 78            | 5 |
| 1   | 3   | 1   | 3   | 4   | 1   | 4   | 81            | 5 |
| 2   | 3   | 2   | 3   | 3   | 2   | 3   | 88            | 5 |
| 4   | 2   | 1   | 3   | 4   | 3   | 4   | 81            | 4 |
| 3   | 4   | 1   | 4   | 4   | 1   | 4   | 92            | 5 |
| 4   | 4   | 4   | 4   | 4   | 4   | 4   | 77            | 5 |
| 3   | 2   | 2   | 4   | 3   | 2   | 4   | 79            | 5 |
| 3   | 1   | 3   | 1   | 4   | 3   | 4   | 74            | 5 |
| 1   | 3   | 1   | 3   | 3   | 2   | 3   | 119           | 3 |
| 4   | 4   | 4   | 4   | 4   | 4   | 4   | 74            | 5 |
| 2   | 2   | 2   | 2   | 3   | 1   | 3   | 94            | 5 |
| 3   | 3   | 2   | 3   | 3   | 4   | 4   | 71            | 5 |
| 3   | 2   | 2   | 2   | 3   | 3   | 2   | 78            | 3 |
| 3   | 2   | 2   | 3   | 3   | 3   | 3   | 80            | 5 |
| 1   | 1   | 1   | 1   | 4   | 1   | 4   | 69            | 5 |
| 1   | 1   | 1   | 2   | 3   | 2   | 3   | 84            | 5 |
| 3   | 3   | 2   | 3   | 3   | 3   | 4   | 89            | 5 |
| 3   | 2   | 1   | 2   | 3   | 2   | 3   | 83            | 5 |
| 3   | 2   | 2   | 4   | 2   | 2   | 3   | 75            | 5 |
| 3   | 2   | 2   | 3   | 3   | 2   | 3   | 71            | 2 |
| 4   | 2   | 3   | 2   | 1   | 4   | 3   | 85            | 5 |
| 2   | 2   | 2   | 2   | 3   | 3   | 3   | 94            | 5 |
| 3   | 3   | 3   | 3   | 4   | 3   | 3   | 79            | 5 |
| 1   | 1   | 1   | 2   | 3   | 1   | 3   | 62            | 5 |
| 2   | 1   | 1   | 1   | 2   | 1   | 3   | 90            | 5 |
| 3   | 3   | 3   | 3   | 3   | 3   | 3   | 80            | 4 |
| 4   | 2   | 2   | 3   | 2   | 3   | 2   | 97            | 5 |
| 3   | 3   | 3   | 2   | 2   | 3   | 3   | 91            | 5 |
| 1   | 3   | 1   | 4   | 3   | 3   | 4   | 120           | 5 |
| 4   | 4   | 4   | 4   | 4   | 4   | 4   | 120           | 5 |
| 3   | 3   | 2   | 3   | 3   | 3   | 3   | 82            | 4 |
| 4   | 4   | 4   | 4   | 4   | 4   | 4   | 90            | 5 |
| 1   | 1   | 1   | 1   | 4   | 1   | 4   | 90            | 5 |
| 3   | 3   | 3   | 3   | 3   | 3   | 3   | 60            | 5 |
| 3   | 3   | 3   | 3   | 3   | 3   | 3   | 103           | 2 |
| 3   | 3   | 3   | 3   | 3   | 3   | 3   | 80            | 4 |
| 1   | 1   | 1   | 1   | 1   | 1   | 1   | 120           | 2 |
| 3   | 3   | 3   | 3   | 3   | 3   | 3   | 46            | 4 |
| 3   | 3   | 3   | 3   | 3   | 3   | 3   | 94            | 5 |
| 4   | 4   | 4   | 4   | 4   | 4   | 4   | 117           | 5 |
| 2   | 2   | 2   | 1   | 1   | 1   | 1   | 74            | 5 |
| 3   | 3   | 3   | 3   | 3   | 3   | 3   | 75            | 3 |
| 4   | 4   | 1   | 4   | 4   | 4   | 4   | 81            | 5 |
| 1   | 2   | 1   | 1   | 4   | 3   | 4   | 100           | 5 |
| 3   | 2   | 2   | 3   | 3   | 2   | 3   | 33            | 5 |



|   |   |   |   |   |   |   |     |   |
|---|---|---|---|---|---|---|-----|---|
| 4 | 4 | 3 | 4 | 3 | 3 | 4 | 102 | 5 |
| 2 | 2 | 2 | 2 | 4 | 2 | 3 | 73  | 5 |
| 1 | 2 | 2 | 2 | 2 | 4 | 4 | 56  | 5 |
| 1 | 1 | 1 | 1 | 1 | 1 | 1 | 30  | 5 |
| 4 | 4 | 2 | 2 | 4 | 4 | 4 | 106 | 5 |
| 1 | 1 | 1 | 1 | 4 | 1 | 2 | 81  | 5 |
| 1 | 1 | 1 | 3 | 4 | 1 | 1 | 65  | 5 |
| 1 | 1 | 1 | 1 | 1 | 1 | 1 | 83  | 5 |
| 4 | 4 | 4 | 4 | 4 | 4 | 4 | 74  | 5 |
| 3 | 2 | 2 | 1 | 3 | 2 | 2 | 37  | 5 |
| 2 | 2 | 2 | 3 | 1 | 2 | 3 | 74  | 5 |
| 2 | 2 | 2 | 3 | 3 | 2 | 3 | 79  | 5 |
| 2 | 1 | 2 | 1 | 4 | 2 | 4 | 30  | 5 |
| 2 | 1 | 1 | 1 | 1 | 1 | 1 | 66  | 5 |
| 3 | 3 | 1 | 3 | 3 | 3 | 3 | 86  | 5 |
| 1 | 4 | 1 | 3 | 3 | 1 | 4 | 76  | 5 |
| 1 | 1 | 1 | 1 | 1 | 1 | 1 | 80  | 5 |
| 2 | 2 | 1 | 1 | 3 | 1 | 1 | 87  | 5 |
| 1 | 4 | 1 | 4 | 4 | 1 | 4 | 75  | 5 |
| 2 | 1 | 2 | 3 | 3 | 2 | 3 | 112 | 5 |
| 2 | 2 | 2 | 4 | 4 | 2 | 3 | 46  | 5 |
| 3 | 2 | 2 | 3 | 2 | 3 | 4 | 76  | 5 |
| 3 | 1 | 1 | 4 | 2 | 2 | 2 | 65  | 5 |
| 4 | 2 | 4 | 4 | 4 | 4 | 4 | 88  | 5 |
| 1 | 1 | 1 | 2 | 1 | 1 | 3 | 61  | 5 |
| 1 | 1 | 1 | 1 | 3 | 1 | 4 | 39  | 5 |
| 3 | 1 | 2 | 1 | 3 | 2 | 3 | 76  | 5 |
| 3 | 3 | 3 | 3 | 3 | 3 | 3 | 76  | 5 |
| 2 | 2 | 1 | 3 | 2 | 2 | 2 | 75  | 5 |
| 1 | 1 | 1 | 1 | 1 | 1 | 1 | 69  | 5 |
| 2 | 2 | 2 | 3 | 3 | 2 | 3 | 85  | 5 |
| 1 | 1 | 1 | 3 | 1 | 1 | 4 | 62  | 5 |
| 2 | 3 | 2 | 2 | 3 | 2 | 4 | 73  | 5 |
| 2 | 2 | 2 | 3 | 4 | 2 | 3 | 77  | 5 |
| 2 | 3 | 3 | 3 | 3 | 3 | 3 | 102 | 2 |
| 1 | 1 | 1 | 1 | 1 | 1 | 4 | 78  | 5 |
| 1 | 2 | 1 | 2 | 4 | 1 | 4 | 82  | 5 |
| 3 | 3 | 1 | 3 | 4 | 2 | 3 | 78  | 5 |
| 4 | 3 | 4 | 3 | 3 | 4 | 3 | 90  | 5 |
| 1 | 4 | 1 | 1 | 3 | 1 | 4 | 64  | 5 |
| 2 | 3 | 3 | 3 | 2 | 3 | 3 | 80  | 5 |
| 2 | 2 | 3 | 2 | 2 | 3 | 2 | 78  | 5 |
| 4 | 4 | 4 | 4 | 1 | 4 | 4 | 58  | 5 |
| 2 | 1 | 1 | 1 | 2 | 1 | 4 | 72  | 5 |
| 2 | 4 | 1 | 1 | 4 | 1 | 3 | 74  | 5 |
| 2 | 2 | 2 | 2 | 2 | 2 | 3 | 62  | 5 |
| 1 | 1 | 1 | 2 | 1 | 2 | 1 | 64  | 5 |
| 1 | 2 | 1 | 1 | 4 | 1 | 4 | 109 | 5 |
| 4 | 1 | 1 | 1 | 4 | 1 | 4 | 39  | 5 |
| 2 | 2 | 1 | 2 | 2 | 2 | 1 | 72  | 5 |
| 1 | 2 | 2 | 2 | 3 | 3 | 3 | 89  | 5 |
| 4 | 4 | 4 | 4 | 4 | 4 | 4 | 77  | 5 |
| 1 | 1 | 1 | 1 | 1 | 1 | 1 | 75  | 5 |
| 1 | 1 | 1 | 2 | 3 | 1 | 3 | 111 | 5 |

|   |   |   |   |   |   |   |     |   |
|---|---|---|---|---|---|---|-----|---|
| 3 | 3 | 3 | 3 | 3 | 3 | 3 | 83  | 3 |
| 3 | 1 | 3 | 3 | 2 | 3 | 3 | 82  | 4 |
| 4 | 1 | 3 | 1 | 1 | 3 | 3 | 75  | 5 |
| 4 | 1 | 1 | 1 | 4 | 4 | 4 | 72  | 5 |
| 3 | 2 | 2 | 2 | 3 | 2 | 3 | 75  | 1 |
| 3 | 1 | 2 | 2 | 3 | 2 | 4 | 92  | 5 |
| 2 | 1 | 1 | 2 | 3 | 3 | 3 | 84  | 5 |
| 1 | 1 | 1 | 2 | 4 | 1 | 4 | 68  | 5 |
| 3 | 1 | 1 | 3 | 4 | 1 | 4 | 91  | 5 |
| 1 | 4 | 4 | 4 | 4 | 2 | 4 | 92  | 4 |
| 2 | 3 | 1 | 2 | 3 | 2 | 4 | 79  | 5 |
| 3 | 3 | 1 | 1 | 4 | 2 | 2 | 79  | 5 |
| 4 | 3 | 2 | 3 | 3 | 3 | 3 | 72  | 5 |
| 3 | 1 | 2 | 1 | 4 | 3 | 2 | 69  | 5 |
| 1 | 1 | 1 | 1 | 4 | 1 | 3 | 77  | 5 |
| 3 | 1 | 1 | 3 | 2 | 3 | 3 | 106 | 5 |
| 3 | 1 | 1 | 1 | 1 | 1 | 3 | 75  | 5 |
| 1 | 4 | 1 | 4 | 1 | 1 | 1 | 105 | 5 |
| 4 | 3 | 1 | 1 | 1 | 1 | 3 | 119 | 5 |
| 3 | 3 | 3 | 3 | 3 | 3 | 3 | 69  | 5 |
| 2 | 2 | 2 | 2 | 3 | 2 | 3 | 68  | 5 |
| 4 | 1 | 1 | 4 | 4 | 4 | 4 | 61  | 5 |
| 4 | 4 | 4 | 4 | 4 | 4 | 4 | 65  | 3 |
| 2 | 1 | 1 | 1 | 2 | 3 | 3 | 66  | 5 |
| 1 | 4 | 3 | 1 | 2 | 2 | 2 | 70  | 5 |
| 1 | 1 | 1 | 1 | 4 | 1 | 2 | 78  | 5 |
| 2 | 2 | 2 | 2 | 2 | 2 | 2 | 97  | 5 |
| 2 | 1 | 1 | 3 | 2 | 2 | 3 | 56  | 5 |
| 2 | 2 | 1 | 2 | 2 | 2 | 2 | 86  | 5 |
| 1 | 1 | 1 | 4 | 4 | 1 | 4 | 74  | 5 |
| 4 | 4 | 1 | 1 | 1 | 1 | 4 | 72  | 5 |
| 1 | 2 | 1 | 1 | 1 | 1 | 1 | 70  | 5 |
| 3 | 3 | 1 | 3 | 3 | 3 | 3 | 30  | 5 |
| 3 | 3 | 2 | 3 | 4 | 2 | 2 | 41  | 5 |
| 2 | 1 | 1 | 1 | 4 | 1 | 4 | 66  | 5 |
| 1 | 1 | 1 | 3 | 3 | 1 | 4 | 60  | 5 |
| 1 | 1 | 1 | 1 | 1 | 1 | 1 | 103 | 5 |
| 1 | 1 | 1 | 1 | 1 | 1 | 1 | 71  | 1 |
| 1 | 1 | 2 | 1 | 1 | 1 | 4 | 82  | 5 |
| 2 | 2 | 2 | 2 | 2 | 2 | 3 | 81  | 3 |
| 3 | 3 | 3 | 4 | 4 | 3 | 4 | 44  | 5 |
| 3 | 4 | 1 | 2 | 1 | 1 | 2 | 89  | 5 |
| 3 | 4 | 1 | 3 | 3 | 2 | 4 | 85  | 5 |
| 2 | 2 | 2 | 2 | 3 | 2 | 3 | 93  | 4 |
| 1 | 1 | 1 | 1 | 1 | 1 | 1 | 88  | 5 |
| 3 | 2 | 2 | 3 | 4 | 2 | 4 | 91  | 5 |
| 4 | 3 | 3 | 1 | 3 | 4 | 4 | 65  | 5 |
| 4 | 3 | 4 | 3 | 2 | 4 | 3 | 105 | 1 |
| 4 | 3 | 2 | 4 | 4 | 4 | 2 | 85  | 5 |
| 4 | 3 | 1 | 4 | 4 | 3 | 2 | 73  | 5 |
| 3 | 2 | 1 | 1 | 2 | 2 | 4 | 69  | 5 |
| 2 | 3 | 1 | 4 | 4 | 4 | 3 | 70  | 3 |
| 4 | 4 | 4 | 3 | 2 | 4 | 3 | 109 | 5 |
| 2 | 1 | 1 | 3 | 3 | 1 | 4 | 85  | 4 |

|   |   |   |   |   |   |   |     |   |
|---|---|---|---|---|---|---|-----|---|
| 1 | 2 | 1 | 1 | 3 | 1 | 3 | 68  | 5 |
| 3 | 1 | 2 | 1 | 3 | 1 | 3 | 76  | 5 |
| 4 | 4 | 2 | 3 | 4 | 3 | 4 | 69  | 5 |
| 3 | 2 | 3 | 3 | 3 | 3 | 3 | 71  | 5 |
| 2 | 2 | 1 | 2 | 3 | 2 | 3 | 93  | 5 |
| 3 | 2 | 2 | 2 | 4 | 2 | 1 | 75  | 1 |
| 2 | 1 | 2 | 1 | 3 | 1 | 3 | 86  | 5 |
| 3 | 1 | 1 | 1 | 4 | 1 | 3 | 63  | 5 |
| 4 | 2 | 4 | 3 | 2 | 4 | 3 | 74  | 4 |
| 2 | 1 | 1 | 1 | 2 | 3 | 2 | 72  | 4 |
| 1 | 2 | 1 | 1 | 4 | 1 | 3 | 66  | 5 |
| 2 | 1 | 1 | 1 | 1 | 2 | 2 | 76  | 3 |
| 2 | 2 | 2 | 2 | 3 | 2 | 3 | 59  | 5 |
| 2 | 1 | 1 | 1 | 4 | 1 | 4 | 70  | 5 |
| 2 | 2 | 1 | 2 | 2 | 1 | 2 | 115 | 4 |
| 3 | 1 | 1 | 1 | 3 | 3 | 4 | 60  | 4 |
| 2 | 1 | 1 | 1 | 1 | 1 | 3 | 77  | 5 |
| 3 | 2 | 2 | 2 | 3 | 3 | 2 | 85  | 4 |
| 4 | 4 | 4 | 4 | 3 | 1 | 4 | 84  | 5 |
| 1 | 1 | 1 | 4 | 1 | 1 | 2 | 57  | 5 |
| 1 | 4 | 1 | 1 | 4 | 1 | 4 | 61  | 5 |
| 3 | 2 | 1 | 3 | 4 | 1 | 4 | 67  | 5 |
| 3 | 4 | 3 | 4 | 3 | 2 | 3 | 79  | 5 |
| 2 | 1 | 1 | 1 | 3 | 1 | 2 | 115 | 1 |
| 1 | 2 | 1 | 1 | 1 | 4 | 4 | 62  | 2 |
| 2 | 3 | 2 | 2 | 2 | 3 | 2 | 91  | 5 |
| 3 | 2 | 2 | 2 | 2 | 2 | 3 | 65  | 3 |
| 4 | 4 | 3 | 3 | 4 | 4 | 4 | 72  | 5 |
| 2 | 1 | 1 | 1 | 3 | 2 | 1 | 66  | 5 |
| 2 | 3 | 4 | 1 | 1 | 4 | 4 | 84  | 5 |
| 2 | 2 | 2 | 3 | 3 | 3 | 2 | 81  | 5 |
| 1 | 1 | 1 | 1 | 4 | 1 | 4 | 76  | 5 |
| 2 | 1 | 1 | 1 | 3 | 1 | 3 | 53  | 5 |
| 1 | 3 | 1 | 2 | 4 | 1 | 3 | 85  | 5 |
| 1 | 1 | 2 | 2 | 4 | 2 | 1 | 72  | 5 |
| 3 | 2 | 2 | 2 | 3 | 2 | 2 | 101 | 5 |
| 2 | 1 | 1 | 1 | 1 | 3 | 2 | 120 | 5 |
| 3 | 4 | 2 | 4 | 4 | 2 | 4 | 90  | 5 |
| 2 | 2 | 2 | 1 | 3 | 2 | 3 | 98  | 5 |
| 3 | 3 | 3 | 3 | 3 | 3 | 4 | 66  | 5 |
| 4 | 4 | 4 | 4 | 4 | 4 | 4 | 73  | 5 |
| 3 | 3 | 3 | 3 | 3 | 3 | 3 | 73  | 5 |
| 4 | 4 | 2 | 2 | 3 | 2 | 4 | 109 | 2 |
| 2 | 1 | 1 | 2 | 4 | 2 | 3 | 60  | 5 |
| 3 | 2 | 2 | 2 | 2 | 3 | 3 | 98  | 5 |
| 3 | 1 | 1 | 2 | 2 | 2 | 2 | 80  | 5 |
| 2 | 4 | 1 | 4 | 4 | 4 | 4 | 88  | 5 |
| 1 | 4 | 1 | 1 | 4 | 1 | 1 | 63  | 5 |
| 3 | 3 | 3 | 3 | 3 | 3 | 4 | 97  | 5 |
| 3 | 1 | 2 | 4 | 4 | 2 | 3 | 82  | 5 |
| 2 | 3 | 1 | 2 | 3 | 3 | 4 | 96  | 1 |
| 3 | 1 | 2 | 1 | 3 | 2 | 1 | 104 | 5 |
| 4 | 4 | 1 | 4 | 4 | 1 | 4 | 83  | 5 |
| 2 | 1 | 2 | 4 | 3 | 2 | 4 | 71  | 4 |

|   |   |   |   |   |   |   |     |   |
|---|---|---|---|---|---|---|-----|---|
| 3 | 3 | 3 | 3 | 3 | 3 | 3 | 85  | 5 |
| 2 | 4 | 4 | 3 | 3 | 4 | 4 | 120 | 5 |
| 1 | 1 | 1 | 1 | 1 | 1 | 1 | 120 | 5 |
| 2 | 2 | 2 | 3 | 2 | 3 | 3 | 83  | 5 |
| 3 | 1 | 3 | 3 | 3 | 2 | 2 | 76  | 5 |
| 4 | 4 | 4 | 4 | 4 | 4 | 4 | 82  | 5 |
| 4 | 4 | 4 | 4 | 4 | 4 | 4 | 96  | 5 |
| 2 | 2 | 2 | 4 | 4 | 3 | 1 | 114 | 5 |
| 3 | 1 | 2 | 3 | 3 | 2 | 3 | 83  | 5 |
| 3 | 3 | 3 | 3 | 3 | 3 | 3 | 70  | 5 |
| 4 | 3 | 2 | 1 | 4 | 4 | 4 | 79  | 5 |
| 4 | 4 | 1 | 4 | 4 | 4 | 4 | 96  | 5 |
| 2 | 2 | 2 | 4 | 4 | 3 | 1 | 92  | 5 |
| 3 | 4 | 3 | 1 | 3 | 1 | 4 | 86  | 5 |
| 1 | 1 | 1 | 1 | 2 | 1 | 4 | 85  | 5 |
| 2 | 2 | 1 | 2 | 3 | 3 | 4 | 84  | 5 |
| 3 | 3 | 3 | 3 | 3 | 3 | 3 | 91  | 5 |
| 3 | 3 | 3 | 3 | 3 | 3 | 3 | 94  | 3 |
| 3 | 1 | 4 | 3 | 3 | 3 | 2 | 74  | 5 |
| 2 | 2 | 3 | 3 | 3 | 3 | 3 | 50  | 5 |
| 2 | 3 | 2 | 4 | 3 | 2 | 3 | 86  | 5 |
| 2 | 4 | 3 | 3 | 2 | 3 | 3 | 94  | 5 |
| 2 | 1 | 2 | 2 | 3 | 2 | 4 | 64  | 5 |
| 1 | 4 | 1 | 1 | 1 | 1 | 1 | 94  | 5 |
| 3 | 1 | 1 | 2 | 2 | 1 | 4 | 120 | 3 |
| 4 | 3 | 4 | 2 | 3 | 4 | 3 | 72  | 5 |
| 2 | 2 | 2 | 2 | 2 | 4 | 4 | 61  | 1 |
| 1 | 1 | 1 | 4 | 4 | 1 | 4 | 87  | 5 |
| 4 | 4 | 4 | 4 | 4 | 4 | 4 | 83  | 5 |
| 2 | 2 | 1 | 3 | 2 | 3 | 4 | 118 | 5 |
| 2 | 2 | 2 | 2 | 2 | 2 | 2 | 70  | 4 |
| 4 | 4 | 4 | 4 | 1 | 4 | 4 | 91  | 3 |
| 3 | 3 | 1 | 3 | 3 | 3 | 2 | 69  | 5 |
| 4 | 4 | 4 | 4 | 4 | 4 | 4 | 88  | 5 |
| 1 | 1 | 1 | 1 | 3 | 3 | 3 | 120 | 5 |
| 3 | 4 | 3 | 4 | 4 | 2 | 2 | 79  | 5 |
| 1 | 1 | 1 | 1 | 4 | 1 | 4 | 105 | 5 |
| 4 | 1 | 1 | 4 | 4 | 1 | 4 | 90  | 1 |
| 4 | 4 | 4 | 4 | 4 | 4 | 4 | 86  | 4 |
| 2 | 4 | 2 | 2 | 4 | 2 | 4 | 65  | 5 |
| 1 | 4 | 2 | 4 | 4 | 4 | 4 | 96  | 5 |
| 3 | 2 | 3 | 3 | 4 | 3 | 3 | 93  | 5 |
| 3 | 3 | 2 | 3 | 3 | 3 | 3 | 69  | 5 |
| 4 | 1 | 1 | 4 | 4 | 4 | 4 | 73  | 5 |
| 4 | 1 | 4 | 4 | 2 | 4 | 3 | 79  | 5 |
| 1 | 2 | 1 | 1 | 2 | 2 | 4 | 107 | 5 |
| 2 | 1 | 1 | 1 | 3 | 1 | 3 | 79  | 5 |
| 2 | 2 | 2 | 2 | 3 | 2 | 3 | 79  | 5 |
| 4 | 2 | 2 | 3 | 4 | 2 | 3 | 76  | 5 |
| 3 | 2 | 3 | 2 | 3 | 2 | 3 | 69  | 3 |
| 3 | 2 | 3 | 2 | 3 | 2 | 3 | 69  | 3 |
| 1 | 1 | 1 | 4 | 4 | 1 | 4 | 80  | 5 |
| 2 | 1 | 1 | 4 | 3 | 1 | 3 | 72  | 5 |
| 2 | 2 | 2 | 3 | 3 | 2 | 2 | 68  | 5 |

|   |   |   |   |   |   |   |     |   |
|---|---|---|---|---|---|---|-----|---|
| 2 | 1 | 2 | 3 | 4 | 2 | 4 | 85  | 5 |
| 2 | 2 | 2 | 2 | 3 | 3 | 4 | 110 | 5 |
| 1 | 1 | 1 | 4 | 1 | 1 | 3 | 74  | 5 |
| 2 | 2 | 2 | 3 | 4 | 2 | 3 | 90  | 5 |
| 4 | 4 | 4 | 4 | 4 | 4 | 4 | 70  | 5 |
| 2 | 3 | 2 | 2 | 2 | 2 | 3 | 69  | 5 |
| 3 | 3 | 3 | 3 | 3 | 3 | 3 | 70  | 4 |
| 2 | 2 | 1 | 1 | 1 | 1 | 2 | 67  | 5 |
| 4 | 1 | 1 | 1 | 2 | 3 | 4 | 107 | 5 |
| 2 | 1 | 2 | 2 | 3 | 2 | 3 | 108 | 5 |
| 2 | 1 | 1 | 1 | 3 | 1 | 3 | 49  | 5 |
| 4 | 2 | 2 | 3 | 4 | 2 | 3 | 84  | 5 |
| 4 | 4 | 4 | 4 | 4 | 4 | 4 | 91  | 5 |
| 2 | 1 | 1 | 1 | 2 | 3 | 4 | 106 | 5 |
| 1 | 4 | 2 | 1 | 4 | 1 | 4 | 44  | 5 |
| 3 | 3 | 3 | 3 | 3 | 3 | 3 | 44  | 5 |
| 3 | 3 | 2 | 4 | 4 | 4 | 4 | 84  | 5 |
| 1 | 2 | 1 | 1 | 1 | 1 | 1 | 96  | 5 |
| 1 | 1 | 1 | 1 | 1 | 1 | 1 | 72  | 5 |
| 3 | 2 | 3 | 4 | 3 | 3 | 3 | 88  | 4 |
| 2 | 2 | 3 | 2 | 4 | 3 | 4 | 81  | 3 |
| 3 | 2 | 2 | 3 | 3 | 3 | 4 | 90  | 5 |
| 4 | 3 | 2 | 4 | 3 | 3 | 4 | 78  | 5 |
| 3 | 2 | 2 | 3 | 3 | 2 | 2 | 69  | 5 |
| 3 | 3 | 3 | 3 | 3 | 3 | 3 | 79  | 5 |
| 2 | 2 | 1 | 1 | 4 | 1 | 4 | 88  | 1 |
| 3 | 2 | 3 | 2 | 2 | 1 | 2 | 73  | 5 |
| 3 | 3 | 2 | 3 | 3 | 3 | 3 | 62  | 5 |
| 4 | 2 | 4 | 4 | 3 | 1 | 4 | 63  | 5 |
| 1 | 1 | 1 | 1 | 4 | 1 | 2 | 44  | 5 |
| 3 | 1 | 3 | 1 | 1 | 2 | 3 | 85  | 5 |
| 3 | 2 | 2 | 1 | 2 | 2 | 3 | 74  | 5 |
| 1 | 1 | 1 | 1 | 1 | 1 | 1 | 80  | 5 |
| 3 | 1 | 4 | 3 | 3 | 3 | 2 | 85  | 5 |
| 2 | 2 | 2 | 3 | 3 | 2 | 3 | 74  | 5 |
| 3 | 3 | 3 | 3 | 3 | 3 | 3 | 80  | 5 |
| 2 | 1 | 1 | 1 | 1 | 2 | 4 | 88  | 5 |
| 2 | 1 | 1 | 1 | 4 | 1 | 4 | 83  | 3 |
| 3 | 3 | 1 | 3 | 2 | 1 | 3 | 92  | 5 |
| 3 | 3 | 2 | 3 | 3 | 2 | 3 | 63  | 3 |
| 3 | 3 | 2 | 3 | 3 | 3 | 3 | 90  | 5 |
| 3 | 3 | 2 | 2 | 4 | 2 | 4 | 89  | 4 |
| 1 | 3 | 1 | 1 | 3 | 1 | 3 | 75  | 5 |
| 3 | 3 | 3 | 3 | 3 | 3 | 3 | 81  | 5 |
| 3 | 3 | 3 | 3 | 3 | 3 | 3 | 51  | 4 |
| 3 | 3 | 2 | 2 | 2 | 3 | 3 | 54  | 5 |
| 3 | 3 | 3 | 3 | 3 | 3 | 3 | 84  | 5 |
| 1 | 3 | 1 | 1 | 1 | 1 | 3 | 72  | 5 |
| 2 | 2 | 1 | 1 | 3 | 1 | 1 | 61  | 2 |
| 4 | 4 | 3 | 2 | 3 | 3 | 3 | 69  | 5 |
| 2 | 2 | 2 | 2 | 4 | 2 | 3 | 84  | 4 |
| 1 | 1 | 1 | 2 | 1 | 1 | 2 | 88  | 5 |
| 2 | 1 | 1 | 2 | 3 | 1 | 1 | 66  | 5 |
| 4 | 4 | 3 | 3 | 2 | 4 | 2 | 94  | 3 |

|   |   |   |   |   |   |   |     |   |
|---|---|---|---|---|---|---|-----|---|
| 3 | 2 | 2 | 2 | 4 | 3 | 3 | 108 | 5 |
| 2 | 2 | 2 | 2 | 2 | 2 | 3 | 118 | 5 |
| 3 | 3 | 2 | 3 | 3 | 4 | 4 | 87  | 5 |
| 3 | 1 | 3 | 3 | 4 | 4 | 4 | 72  | 5 |
| 4 | 4 | 4 | 4 | 4 | 4 | 4 | 81  | 5 |
| 3 | 3 | 3 | 3 | 2 | 3 | 3 | 70  | 5 |
| 2 | 1 | 1 | 3 | 4 | 1 | 4 | 120 | 5 |
| 1 | 2 | 2 | 4 | 3 | 3 | 2 | 80  | 5 |
| 3 | 3 | 1 | 2 | 3 | 1 | 2 | 74  | 5 |
| 4 | 4 | 4 | 4 | 4 | 4 | 4 | 88  | 5 |
| 3 | 1 | 1 | 3 | 4 | 2 | 3 | 82  | 3 |
| 2 | 2 | 1 | 3 | 3 | 2 | 3 | 78  | 2 |
| 3 | 3 | 3 | 3 | 3 | 3 | 3 | 120 | 5 |
| 3 | 2 | 3 | 3 | 3 | 3 | 3 | 120 | 5 |
| 3 | 2 | 1 | 3 | 2 | 3 | 3 | 61  | 5 |
| 4 | 4 | 4 | 4 | 4 | 4 | 4 | 90  | 5 |
| 4 | 4 | 4 | 4 | 4 | 4 | 4 | 80  | 5 |
| 2 | 1 | 1 | 1 | 1 | 1 | 2 | 71  | 2 |
| 3 | 3 | 3 | 3 | 3 | 3 | 3 | 93  | 5 |
| 3 | 3 | 2 | 3 | 3 | 2 | 3 | 80  | 4 |
| 3 | 1 | 1 | 2 | 2 | 2 | 3 | 66  | 5 |
| 3 | 3 | 3 | 3 | 3 | 3 | 3 | 67  | 3 |
| 3 | 3 | 1 | 1 | 4 | 2 | 3 | 92  | 5 |
| 3 | 1 | 1 | 1 | 3 | 2 | 3 | 86  | 3 |
| 3 | 2 | 2 | 2 | 3 | 2 | 2 | 71  | 5 |
| 3 | 1 | 1 | 3 | 4 | 1 | 4 | 71  | 5 |
| 3 | 3 | 4 | 4 | 3 | 3 | 3 | 65  | 3 |
| 3 | 1 | 1 | 4 | 3 | 3 | 3 | 65  | 4 |
| 2 | 2 | 1 | 3 | 2 | 1 | 3 | 91  | 5 |
| 3 | 2 | 2 | 3 | 2 | 2 | 2 | 81  | 5 |
| 1 | 1 | 1 | 1 | 3 | 2 | 3 | 63  | 5 |
| 2 | 2 | 2 | 2 | 2 | 2 | 2 | 60  | 4 |
| 2 | 3 | 2 | 4 | 4 | 3 | 4 | 96  | 3 |
| 3 | 2 | 1 | 3 | 2 | 1 | 4 | 81  | 5 |
| 2 | 2 | 3 | 2 | 2 | 2 | 2 | 74  | 5 |
| 1 | 3 | 1 | 3 | 3 | 1 | 1 | 102 | 1 |
| 4 | 4 | 2 | 3 | 2 | 3 | 2 | 77  | 5 |
| 3 | 3 | 3 | 3 | 3 | 3 | 3 | 100 | 4 |
| 2 | 2 | 2 | 4 | 3 | 2 | 3 | 86  | 5 |
| 4 | 4 | 1 | 4 | 4 | 4 | 1 | 68  | 5 |
| 1 | 1 | 1 | 4 | 4 | 2 | 2 | 89  | 5 |
| 1 | 4 | 1 | 4 | 4 | 1 | 4 | 88  | 5 |
| 3 | 3 | 4 | 3 | 3 | 3 | 2 | 83  | 1 |
| 2 | 2 | 2 | 2 | 4 | 2 | 3 | 90  | 5 |
| 3 | 4 | 2 | 2 | 4 | 3 | 4 | 60  | 5 |
| 3 | 2 | 2 | 3 | 2 | 3 | 3 | 88  | 4 |
| 3 | 4 | 2 | 1 | 4 | 3 | 2 | 60  | 5 |
| 3 | 3 | 3 | 3 | 3 | 3 | 3 | 84  | 3 |
| 2 | 2 | 2 | 2 | 2 | 2 | 2 | 78  | 5 |
| 3 | 2 | 2 | 3 | 3 | 2 | 2 | 71  | 4 |
| 1 | 1 | 1 | 1 | 1 | 1 | 1 | 65  | 2 |
| 3 | 3 | 3 | 3 | 3 | 2 | 3 | 95  | 4 |
| 2 | 3 | 2 | 3 | 2 | 3 | 2 | 88  | 2 |
| 1 | 1 | 1 | 1 | 4 | 3 | 4 | 69  | 5 |

|   |   |   |   |   |   |   |     |   |
|---|---|---|---|---|---|---|-----|---|
| 1 | 3 | 1 | 1 | 3 | 1 | 3 | 70  | 4 |
| 2 | 2 | 1 | 1 | 4 | 4 | 4 | 72  | 5 |
| 3 | 3 | 2 | 3 | 3 | 2 | 3 | 56  | 3 |
| 2 | 2 | 2 | 2 | 3 | 2 | 4 | 80  | 1 |
| 2 | 2 | 2 | 3 | 3 | 2 | 2 | 73  | 5 |
| 1 | 1 | 1 | 1 | 4 | 1 | 4 | 74  | 5 |
| 2 | 1 | 1 | 1 | 1 | 1 | 3 | 80  | 5 |
| 3 | 2 | 1 | 3 | 4 | 3 | 4 | 92  | 5 |
| 1 | 1 | 1 | 1 | 4 | 1 | 4 | 75  | 5 |
| 1 | 2 | 1 | 1 | 3 | 3 | 3 | 79  | 5 |
| 3 | 2 | 2 | 3 | 3 | 1 | 3 | 57  | 5 |
| 3 | 2 | 2 | 2 | 3 | 3 | 2 | 105 | 5 |
| 3 | 2 | 2 | 2 | 3 | 3 | 3 | 69  | 5 |
| 2 | 3 | 1 | 4 | 4 | 2 | 4 | 76  | 5 |
| 2 | 1 | 1 | 2 | 2 | 1 | 1 | 99  | 5 |
| 4 | 4 | 3 | 2 | 4 | 4 | 4 | 118 | 4 |
| 2 | 2 | 1 | 4 | 3 | 1 | 3 | 76  | 5 |
| 4 | 2 | 1 | 1 | 2 | 1 | 2 | 60  | 5 |
| 1 | 4 | 1 | 1 | 4 | 1 | 4 | 80  | 5 |
| 4 | 4 | 4 | 4 | 4 | 4 | 4 | 81  | 5 |
| 2 | 2 | 2 | 3 | 3 | 3 | 3 | 76  | 1 |
| 2 | 1 | 1 | 1 | 3 | 1 | 3 | 46  | 5 |
| 2 | 3 | 2 | 3 | 3 | 2 | 3 | 72  | 2 |
| 2 | 2 | 2 | 2 | 3 | 2 | 4 | 97  | 3 |
| 2 | 1 | 1 | 4 | 4 | 4 | 4 | 65  | 5 |
| 2 | 2 | 2 | 1 | 1 | 1 | 1 | 106 | 5 |
| 2 | 1 | 1 | 2 | 4 | 1 | 4 | 72  | 5 |
| 2 | 1 | 1 | 4 | 4 | 2 | 2 | 81  | 5 |
| 1 | 1 | 4 | 2 | 2 | 3 | 3 | 81  | 5 |
| 4 | 4 | 2 | 4 | 2 | 3 | 3 | 53  | 5 |
| 3 | 2 | 1 | 1 | 3 | 1 | 2 | 74  | 5 |
| 3 | 3 | 2 | 2 | 3 | 3 | 3 | 66  | 5 |
| 2 | 2 | 2 | 3 | 2 | 2 | 3 | 113 | 4 |
| 4 | 1 | 1 | 1 | 2 | 3 | 1 | 83  | 5 |
| 1 | 2 | 2 | 3 | 3 | 1 | 3 | 63  | 5 |
| 1 | 1 | 1 | 3 | 3 | 1 | 3 | 98  | 5 |
| 3 | 4 | 4 | 4 | 4 | 4 | 4 | 81  | 5 |
| 3 | 3 | 2 | 3 | 2 | 3 | 3 | 76  | 5 |
| 1 | 1 | 1 | 1 | 2 | 2 | 2 | 68  | 5 |
| 4 | 2 | 3 | 2 | 4 | 3 | 3 | 75  | 5 |
| 3 | 1 | 1 | 1 | 4 | 3 | 3 | 90  | 5 |
| 2 | 2 | 2 | 3 | 3 | 2 | 3 | 88  | 2 |
| 1 | 1 | 1 | 1 | 4 | 1 | 4 | 63  | 5 |
| 3 | 2 | 2 | 3 | 3 | 2 | 3 | 97  | 5 |
| 3 | 3 | 3 | 3 | 3 | 3 | 3 | 120 | 4 |
| 2 | 2 | 1 | 4 | 3 | 3 | 3 | 73  | 5 |
| 3 | 2 | 2 | 2 | 3 | 2 | 3 | 90  | 5 |
| 3 | 3 | 1 | 3 | 3 | 3 | 4 | 73  | 5 |
| 4 | 4 | 4 | 4 | 4 | 4 | 4 | 64  | 5 |
| 3 | 2 | 2 | 1 | 3 | 3 | 3 | 76  | 5 |
| 3 | 4 | 3 | 3 | 3 | 3 | 3 | 84  | 5 |
| 4 | 2 | 1 | 1 | 3 | 1 | 1 | 87  | 5 |
| 2 | 1 | 1 | 1 | 4 | 2 | 3 | 103 | 5 |
| 2 | 2 | 1 | 2 | 3 | 1 | 3 | 67  | 5 |

|   |   |   |   |   |   |   |     |   |
|---|---|---|---|---|---|---|-----|---|
| 1 | 3 | 1 | 4 | 4 | 2 | 3 | 68  | 5 |
| 1 | 4 | 2 | 4 | 4 | 4 | 4 | 60  | 5 |
| 3 | 3 | 3 | 3 | 3 | 3 | 3 | 75  | 5 |
| 1 | 2 | 1 | 1 | 2 | 3 | 3 | 73  | 5 |
| 4 | 1 | 2 | 1 | 1 | 4 | 4 | 91  | 5 |
| 1 | 1 | 1 | 1 | 3 | 1 | 3 | 120 | 1 |
| 3 | 2 | 2 | 3 | 4 | 2 | 3 | 78  | 5 |
| 4 | 2 | 1 | 1 | 3 | 1 | 1 | 63  | 5 |
| 2 | 3 | 3 | 3 | 3 | 2 | 4 | 67  | 5 |
| 4 | 4 | 4 | 4 | 4 | 4 | 4 | 52  | 5 |
| 2 | 1 | 1 | 1 | 4 | 1 | 4 | 83  | 5 |
| 1 | 1 | 1 | 1 | 1 | 1 | 4 | 70  | 1 |
| 1 | 1 | 1 | 2 | 3 | 1 | 4 | 101 | 5 |
| 2 | 2 | 2 | 2 | 1 | 1 | 2 | 80  | 5 |
| 3 | 2 | 2 | 3 | 4 | 3 | 3 | 77  | 5 |
| 1 | 1 | 1 | 1 | 4 | 1 | 4 | 95  | 5 |
| 3 | 3 | 3 | 3 | 3 | 3 | 3 | 102 | 5 |
| 2 | 2 | 2 | 3 | 4 | 2 | 3 | 75  | 5 |
| 2 | 2 | 1 | 2 | 3 | 2 | 4 | 79  | 1 |
| 1 | 1 | 2 | 4 | 4 | 2 | 4 | 65  | 5 |
| 3 | 3 | 3 | 3 | 3 | 3 | 3 | 88  | 5 |
| 2 | 2 | 1 | 2 | 3 | 1 | 3 | 91  | 5 |
| 1 | 1 | 1 | 1 | 4 | 1 | 3 | 65  | 5 |
| 1 | 1 | 2 | 1 | 3 | 1 | 3 | 71  | 5 |
| 3 | 1 | 1 | 2 | 3 | 2 | 4 | 119 | 5 |
| 1 | 1 | 1 | 3 | 4 | 2 | 2 | 79  | 5 |
| 1 | 1 | 1 | 1 | 3 | 1 | 4 | 82  | 5 |
| 2 | 2 | 2 | 3 | 2 | 2 | 3 | 90  | 5 |
| 4 | 4 | 4 | 4 | 4 | 4 | 4 | 82  | 5 |
| 2 | 2 | 2 | 3 | 3 | 2 | 2 | 69  | 4 |
| 3 | 2 | 1 | 2 | 4 | 3 | 3 | 63  | 4 |
| 1 | 1 | 1 | 4 | 4 | 1 | 4 | 88  | 5 |
| 3 | 2 | 2 | 3 | 3 | 2 | 2 | 67  | 5 |
| 2 | 1 | 2 | 2 | 3 | 2 | 3 | 73  | 4 |
| 1 | 3 | 1 | 1 | 1 | 1 | 4 | 89  | 5 |
| 2 | 3 | 3 | 3 | 2 | 3 | 3 | 83  | 5 |
| 2 | 1 | 1 | 2 | 3 | 2 | 3 | 77  | 5 |
| 3 | 3 | 3 | 2 | 2 | 2 | 2 | 104 | 3 |
| 3 | 3 | 3 | 3 | 3 | 3 | 3 | 83  | 3 |
| 2 | 3 | 2 | 2 | 3 | 2 | 4 | 66  | 1 |
| 4 | 3 | 3 | 2 | 1 | 4 | 2 | 67  | 4 |
| 3 | 2 | 2 | 4 | 4 | 3 | 4 | 73  | 5 |
| 2 | 3 | 2 | 2 | 3 | 2 | 3 | 81  | 5 |
| 3 | 1 | 1 | 3 | 3 | 3 | 3 | 76  | 5 |
| 1 | 1 | 1 | 1 | 1 | 1 | 3 | 71  | 5 |
| 3 | 2 | 2 | 2 | 3 | 2 | 3 | 83  | 5 |
| 1 | 2 | 2 | 4 | 3 | 3 | 2 | 75  | 5 |
| 1 | 2 | 2 | 2 | 3 | 2 | 3 | 86  | 5 |
| 1 | 2 | 1 | 1 | 3 | 1 | 4 | 93  | 5 |
| 3 | 3 | 3 | 2 | 3 | 3 | 3 | 92  | 5 |
| 3 | 3 | 3 | 3 | 3 | 3 | 3 | 90  | 3 |
| 4 | 4 | 4 | 4 | 4 | 4 | 4 | 71  | 5 |
| 3 | 3 | 2 | 2 | 3 | 2 | 4 | 58  | 5 |
| 2 | 1 | 1 | 1 | 2 | 2 | 4 | 67  | 5 |



|   |   |   |   |   |   |   |     |   |
|---|---|---|---|---|---|---|-----|---|
| 3 | 3 | 3 | 3 | 3 | 3 | 3 | 85  | 5 |
| 2 | 2 | 3 | 2 | 2 | 2 | 2 | 70  | 4 |
| 2 | 1 | 1 | 1 | 2 | 1 | 3 | 55  | 5 |
| 2 | 3 | 2 | 3 | 2 | 3 | 2 | 86  | 3 |
| 3 | 2 | 3 | 3 | 3 | 3 | 3 | 67  | 5 |
| 2 | 2 | 1 | 1 | 3 | 3 | 3 | 69  | 3 |
| 1 | 1 | 1 | 1 | 2 | 1 | 2 | 77  | 2 |
| 4 | 2 | 3 | 1 | 3 | 4 | 3 | 51  | 5 |
| 2 | 2 | 1 | 1 | 1 | 1 | 2 | 74  | 5 |
| 2 | 2 | 2 | 2 | 2 | 2 | 2 | 73  | 5 |
| 3 | 2 | 2 | 2 | 2 | 2 | 2 | 62  | 4 |
| 1 | 1 | 1 | 2 | 1 | 1 | 3 | 96  | 5 |
| 2 | 3 | 3 | 3 | 2 | 2 | 2 | 82  | 5 |
| 2 | 1 | 2 | 1 | 3 | 3 | 3 | 64  | 5 |
| 2 | 2 | 2 | 2 | 2 | 2 | 2 | 73  | 3 |
| 4 | 4 | 3 | 4 | 3 | 3 | 4 | 89  | 5 |
| 3 | 3 | 2 | 3 | 2 | 3 | 3 | 83  | 3 |
| 2 | 2 | 2 | 3 | 2 | 2 | 3 | 81  | 5 |
| 3 | 2 | 2 | 1 | 3 | 3 | 3 | 60  | 5 |
| 2 | 2 | 2 | 2 | 2 | 2 | 4 | 85  | 5 |
| 3 | 2 | 2 | 3 | 4 | 3 | 3 | 82  | 5 |
| 3 | 1 | 1 | 3 | 3 | 3 | 3 | 83  | 5 |
| 2 | 2 | 2 | 2 | 2 | 2 | 2 | 64  | 5 |
| 3 | 2 | 3 | 3 | 3 | 3 | 3 | 83  | 4 |
| 2 | 3 | 1 | 2 | 2 | 3 | 4 | 87  | 5 |
| 1 | 1 | 2 | 1 | 4 | 1 | 4 | 82  | 5 |
| 4 | 1 | 2 | 1 | 1 | 2 | 3 | 120 | 5 |
| 3 | 3 | 2 | 3 | 3 | 3 | 3 | 65  | 5 |
| 1 | 2 | 2 | 3 | 3 | 2 | 3 | 111 | 5 |
| 3 | 2 | 3 | 4 | 4 | 3 | 4 | 85  | 3 |
| 4 | 4 | 4 | 4 | 4 | 4 | 4 | 77  | 1 |
| 2 | 2 | 2 | 2 | 2 | 2 | 2 | 120 | 4 |
| 3 | 3 | 3 | 3 | 3 | 3 | 3 | 120 | 5 |
| 3 | 3 | 3 | 3 | 3 | 3 | 3 | 76  | 4 |
| 3 | 3 | 2 | 3 | 3 | 3 | 3 | 101 | 5 |
| 4 | 4 | 4 | 4 | 4 | 4 | 4 | 50  | 5 |
| 4 | 4 | 4 | 4 | 4 | 4 | 4 | 100 | 5 |
| 2 | 2 | 3 | 3 | 2 | 2 | 2 | 74  | 5 |
| 3 | 3 | 3 | 4 | 4 | 4 | 3 | 107 | 5 |
| 1 | 1 | 1 | 1 | 1 | 1 | 4 | 73  | 5 |
| 3 | 3 | 3 | 3 | 3 | 3 | 3 | 87  | 5 |
| 3 | 3 | 3 | 3 | 3 | 3 | 3 | 81  | 5 |
| 3 | 3 | 4 | 4 | 4 | 4 | 4 | 88  | 5 |
| 2 | 2 | 2 | 2 | 2 | 2 | 3 | 76  | 5 |
| 3 | 3 | 3 | 3 | 3 | 3 | 3 | 73  | 5 |
| 1 | 2 | 2 | 3 | 4 | 2 | 3 | 120 | 5 |
| 3 | 2 | 2 | 3 | 3 | 3 | 3 | 61  | 5 |
| 3 | 2 | 2 | 3 | 3 | 3 | 3 | 68  | 5 |
| 2 | 2 | 2 | 3 | 2 | 2 | 3 | 71  | 5 |
| 4 | 4 | 4 | 4 | 4 | 4 | 4 | 61  | 5 |
| 2 | 2 | 2 | 2 | 2 | 2 | 2 | 37  | 4 |
| 3 | 3 | 2 | 3 | 3 | 3 | 3 | 104 | 5 |
| 2 | 2 | 2 | 2 | 2 | 2 | 3 | 58  | 5 |
| 2 | 2 | 3 | 2 | 2 | 2 | 2 | 86  | 5 |

|   |   |   |   |   |   |   |     |   |
|---|---|---|---|---|---|---|-----|---|
| 1 | 1 | 1 | 2 | 1 | 1 | 1 | 83  | 5 |
| 4 | 4 | 4 | 4 | 4 | 4 | 4 | 37  | 1 |
| 1 | 1 | 1 | 2 | 2 | 1 | 3 | 94  | 5 |
| 2 | 3 | 2 | 3 | 3 | 2 | 3 | 66  | 5 |
| 3 | 2 | 3 | 1 | 3 | 2 | 2 | 69  | 3 |
| 1 | 1 | 1 | 1 | 1 | 1 | 1 | 91  | 5 |
| 4 | 1 | 2 | 4 | 4 | 3 | 4 | 76  | 5 |
| 1 | 1 | 1 | 3 | 3 | 1 | 4 | 60  | 5 |
| 3 | 1 | 3 | 1 | 2 | 3 | 3 | 70  | 5 |
| 3 | 4 | 1 | 2 | 2 | 3 | 3 | 83  | 5 |
| 3 | 2 | 2 | 3 | 2 | 3 | 3 | 85  | 1 |
| 2 | 2 | 2 | 2 | 2 | 2 | 2 | 91  | 4 |
| 2 | 3 | 2 | 3 | 2 | 2 | 3 | 80  | 5 |
| 2 | 3 | 2 | 3 | 3 | 2 | 3 | 64  | 5 |
| 3 | 3 | 3 | 2 | 3 | 1 | 3 | 82  | 5 |
| 3 | 3 | 3 | 3 | 3 | 2 | 3 | 55  | 1 |
| 2 | 3 | 2 | 3 | 3 | 3 | 3 | 83  | 5 |
| 2 | 2 | 1 | 2 | 3 | 3 | 3 | 68  | 5 |
| 3 | 2 | 2 | 3 | 3 | 3 | 3 | 92  | 5 |
| 2 | 3 | 1 | 1 | 1 | 1 | 2 | 90  | 5 |
| 3 | 3 | 2 | 3 | 3 | 2 | 4 | 83  | 5 |
| 2 | 2 | 2 | 2 | 3 | 3 | 3 | 80  | 5 |
| 3 | 3 | 3 | 3 | 3 | 3 | 3 | 83  | 5 |
| 3 | 3 | 2 | 3 | 3 | 3 | 3 | 76  | 5 |
| 2 | 3 | 2 | 4 | 2 | 2 | 3 | 111 | 5 |
| 2 | 2 | 2 | 2 | 4 | 2 | 3 | 107 | 5 |
| 3 | 2 | 2 | 3 | 3 | 3 | 3 | 61  | 5 |
| 1 | 3 | 1 | 2 | 2 | 3 | 3 | 67  | 5 |
| 4 | 4 | 2 | 4 | 4 | 4 | 4 | 120 | 5 |
| 4 | 4 | 2 | 4 | 4 | 4 | 4 | 78  | 5 |
| 2 | 2 | 1 | 2 | 2 | 2 | 2 | 74  | 1 |
| 3 | 2 | 1 | 1 | 3 | 1 | 2 | 83  | 4 |
| 4 | 4 | 4 | 4 | 4 | 4 | 4 | 58  | 5 |
| 3 | 3 | 1 | 1 | 3 | 2 | 3 | 61  | 5 |
| 1 | 2 | 2 | 1 | 4 | 1 | 3 | 63  | 5 |
| 2 | 3 | 2 | 3 | 3 | 2 | 3 | 76  | 5 |
| 1 | 1 | 1 | 1 | 3 | 1 | 3 | 120 | 5 |
| 2 | 2 | 2 | 2 | 2 | 2 | 2 | 41  | 5 |
| 1 | 3 | 1 | 1 | 3 | 1 | 2 | 63  | 5 |
| 2 | 2 | 2 | 3 | 3 | 2 | 3 | 67  | 5 |
| 4 | 4 | 4 | 4 | 4 | 4 | 4 | 81  | 5 |
| 1 | 1 | 1 | 1 | 1 | 1 | 1 | 79  | 5 |
| 2 | 2 | 1 | 3 | 2 | 2 | 4 | 100 | 4 |
| 2 | 3 | 2 | 2 | 2 | 3 | 2 | 88  | 5 |
| 1 | 3 | 1 | 3 | 4 | 1 | 4 | 92  | 5 |
| 4 | 2 | 1 | 4 | 3 | 1 | 4 | 88  | 5 |
| 4 | 4 | 4 | 4 | 1 | 4 | 4 | 93  | 5 |
| 3 | 2 | 3 | 3 | 2 | 3 | 3 | 71  | 5 |
| 1 | 4 | 4 | 4 | 4 | 2 | 4 | 120 | 4 |
| 3 | 3 | 3 | 2 | 3 | 2 | 2 | 79  | 5 |
| 3 | 1 | 4 | 3 | 3 | 4 | 4 | 64  | 5 |
| 3 | 3 | 3 | 3 | 2 | 3 | 1 | 91  | 4 |
| 4 | 4 | 4 | 4 | 4 | 4 | 4 | 62  | 5 |
| 2 | 1 | 1 | 1 | 4 | 1 | 4 | 78  | 4 |

|   |   |   |   |   |   |   |     |   |
|---|---|---|---|---|---|---|-----|---|
| 1 | 1 | 1 | 1 | 1 | 1 | 4 | 111 | 5 |
| 3 | 3 | 3 | 3 | 3 | 3 | 3 | 78  | 5 |
| 3 | 2 | 3 | 1 | 3 | 2 | 2 | 56  | 5 |
| 2 | 3 | 1 | 3 | 3 | 2 | 3 | 88  | 4 |
| 4 | 1 | 4 | 4 | 4 | 4 | 3 | 110 | 5 |
| 3 | 4 | 1 | 1 | 4 | 1 | 4 | 66  | 5 |
| 3 | 2 | 1 | 3 | 4 | 3 | 2 | 74  | 5 |
| 3 | 3 | 3 | 3 | 3 | 3 | 3 | 88  | 5 |
| 4 | 4 | 4 | 4 | 4 | 4 | 4 | 74  | 5 |
| 1 | 1 | 1 | 1 | 4 | 1 | 4 | 120 | 5 |
| 2 | 2 | 2 | 2 | 2 | 2 | 3 | 105 | 5 |
| 3 | 3 | 3 | 3 | 3 | 3 | 3 | 81  | 5 |
| 2 | 2 | 3 | 3 | 3 | 3 | 3 | 62  | 5 |
| 4 | 4 | 4 | 4 | 4 | 4 | 4 | 116 | 5 |
| 3 | 4 | 4 | 4 | 3 | 4 | 4 | 86  | 5 |
| 2 | 2 | 1 | 2 | 3 | 3 | 3 | 51  | 5 |
| 1 | 1 | 1 | 1 | 1 | 2 | 4 | 63  | 5 |
| 4 | 4 | 4 | 3 | 4 | 4 | 4 | 76  | 1 |
| 2 | 3 | 2 | 3 | 2 | 3 | 2 | 83  | 5 |
| 1 | 1 | 1 | 1 | 2 | 1 | 1 | 90  | 5 |
| 2 | 1 | 1 | 1 | 1 | 1 | 1 | 84  | 3 |
| 2 | 3 | 1 | 4 | 4 | 2 | 2 | 78  | 5 |
| 3 | 3 | 1 | 2 | 3 | 1 | 4 | 86  | 5 |
| 3 | 4 | 4 | 2 | 4 | 2 | 3 | 70  | 5 |
| 1 | 2 | 1 | 1 | 4 | 1 | 3 | 79  | 5 |
| 3 | 1 | 1 | 2 | 4 | 2 | 2 | 51  | 5 |
| 4 | 2 | 1 | 3 | 4 | 3 | 4 | 69  | 5 |
| 3 | 2 | 3 | 1 | 2 | 1 | 3 | 104 | 5 |
| 2 | 3 | 2 | 2 | 3 | 2 | 3 | 75  | 4 |
| 1 | 1 | 1 | 1 | 2 | 1 | 1 | 92  | 5 |
| 1 | 1 | 1 | 1 | 3 | 1 | 1 | 83  | 2 |
| 3 | 1 | 2 | 3 | 4 | 3 | 4 | 49  | 5 |
| 4 | 1 | 1 | 1 | 4 | 1 | 4 | 96  | 5 |
| 3 | 3 | 3 | 4 | 4 | 3 | 3 | 75  | 5 |
| 2 | 2 | 3 | 2 | 3 | 3 | 4 | 79  | 3 |
| 1 | 1 | 1 | 1 | 1 | 1 | 1 | 84  | 5 |
| 4 | 4 | 1 | 2 | 3 | 4 | 4 | 77  | 5 |
| 1 | 1 | 1 | 1 | 4 | 1 | 4 | 71  | 5 |
| 4 | 4 | 1 | 2 | 3 | 3 | 3 | 75  | 5 |
| 3 | 3 | 2 | 3 | 2 | 2 | 2 | 72  | 5 |
| 2 | 2 | 2 | 2 | 3 | 2 | 3 | 33  | 5 |
| 1 | 1 | 1 | 4 | 4 | 1 | 4 | 120 | 1 |
| 1 | 4 | 1 | 1 | 4 | 1 | 4 | 64  | 5 |
| 2 | 2 | 2 | 1 | 3 | 2 | 2 | 75  | 5 |
| 1 | 1 | 1 | 1 | 1 | 1 | 1 | 77  | 5 |
| 4 | 4 | 4 | 4 | 4 | 4 | 4 | 83  | 5 |
| 1 | 1 | 1 | 1 | 1 | 1 | 4 | 73  | 5 |
| 2 | 1 | 1 | 1 | 2 | 1 | 1 | 72  | 4 |
| 3 | 3 | 1 | 1 | 3 | 3 | 3 | 120 | 5 |
| 1 | 1 | 1 | 1 | 4 | 1 | 4 | 71  | 5 |
| 3 | 2 | 3 | 2 | 3 | 2 | 3 | 86  | 5 |
| 4 | 4 | 4 | 4 | 4 | 4 | 4 | 63  | 5 |
| 2 | 1 | 2 | 2 | 2 | 1 | 2 | 71  | 5 |
| 4 | 2 | 1 | 4 | 4 | 2 | 3 | 67  | 5 |

|   |   |   |   |   |   |   |     |   |
|---|---|---|---|---|---|---|-----|---|
| 2 | 1 | 1 | 1 | 3 | 1 | 3 | 89  | 1 |
| 3 | 1 | 1 | 2 | 2 | 3 | 3 | 118 | 5 |
| 1 | 1 | 1 | 1 | 4 | 1 | 3 | 72  | 5 |
| 2 | 2 | 2 | 3 | 3 | 2 | 4 | 95  | 5 |
| 4 | 4 | 4 | 4 | 4 | 4 | 4 | 90  | 5 |
| 1 | 1 | 1 | 1 | 1 | 1 | 1 | 87  | 5 |
| 3 | 3 | 3 | 3 | 3 | 2 | 3 | 117 | 5 |
| 1 | 1 | 4 | 1 | 4 | 4 | 4 | 60  | 5 |
| 4 | 2 | 1 | 4 | 4 | 1 | 4 | 92  | 5 |
| 4 | 4 | 4 | 4 | 4 | 4 | 4 | 60  | 1 |
| 1 | 4 | 1 | 4 | 1 | 1 | 1 | 111 | 5 |
| 4 | 3 | 2 | 2 | 3 | 4 | 4 | 77  | 5 |
| 1 | 4 | 1 | 4 | 1 | 1 | 1 | 84  | 5 |
| 3 | 3 | 3 | 3 | 3 | 3 | 4 | 77  | 5 |
| 2 | 2 | 1 | 3 | 3 | 1 | 3 | 74  | 5 |
| 3 | 1 | 1 | 3 | 3 | 2 | 4 | 61  | 5 |
| 2 | 2 | 1 | 3 | 3 | 1 | 3 | 72  | 5 |
| 4 | 1 | 1 | 1 | 4 | 2 | 4 | 43  | 5 |
| 1 | 1 | 1 | 1 | 3 | 1 | 4 | 90  | 5 |
| 2 | 2 | 2 | 2 | 2 | 1 | 4 | 120 | 5 |
| 1 | 1 | 1 | 1 | 1 | 1 | 1 | 96  | 5 |
| 3 | 3 | 3 | 3 | 3 | 3 | 3 | 60  | 5 |
| 4 | 4 | 4 | 4 | 4 | 4 | 4 | 90  | 5 |
| 4 | 4 | 1 | 4 | 4 | 4 | 4 | 69  | 5 |
| 2 | 2 | 2 | 2 | 2 | 2 | 2 | 76  | 2 |
| 3 | 3 | 3 | 3 | 3 | 3 | 3 | 97  | 4 |
| 3 | 1 | 1 | 2 | 3 | 1 | 2 | 67  | 2 |
| 2 | 2 | 2 | 2 | 3 | 2 | 3 | 74  | 5 |
| 2 | 1 | 1 | 4 | 4 | 2 | 2 | 69  | 5 |
| 3 | 1 | 1 | 3 | 1 | 3 | 3 | 74  | 5 |
| 2 | 2 | 2 | 2 | 2 | 2 | 2 | 80  | 5 |
| 2 | 3 | 2 | 2 | 2 | 2 | 3 | 80  | 5 |
| 3 | 1 | 1 | 1 | 4 | 3 | 3 | 79  | 5 |
| 2 | 3 | 2 | 3 | 3 | 2 | 3 | 86  | 5 |
| 1 | 1 | 1 | 1 | 4 | 1 | 3 | 84  | 5 |
| 3 | 3 | 3 | 3 | 3 | 3 | 3 | 65  | 5 |
| 3 | 1 | 1 | 2 | 2 | 3 | 3 | 54  | 5 |
| 2 | 1 | 1 | 3 | 2 | 1 | 1 | 84  | 5 |
| 2 | 2 | 2 | 2 | 3 | 2 | 3 | 75  | 5 |
| 3 | 3 | 3 | 3 | 3 | 3 | 3 | 89  | 4 |
| 1 | 4 | 2 | 2 | 4 | 2 | 4 | 101 | 5 |
| 1 | 2 | 1 | 1 | 3 | 1 | 3 | 71  | 5 |
| 3 | 1 | 1 | 2 | 3 | 2 | 4 | 76  | 5 |
| 2 | 2 | 2 | 2 | 2 | 2 | 2 | 65  | 5 |
| 4 | 4 | 4 | 4 | 4 | 4 | 4 | 115 | 5 |
| 1 | 4 | 1 | 4 | 4 | 1 | 4 | 75  | 5 |
| 1 | 2 | 3 | 3 | 3 | 2 | 4 | 89  | 5 |
| 2 | 2 | 2 | 2 | 3 | 2 | 3 | 65  | 5 |
| 2 | 2 | 2 | 2 | 3 | 2 | 3 | 64  | 1 |
| 2 | 2 | 2 | 1 | 3 | 2 | 2 | 70  | 4 |
| 3 | 2 | 2 | 2 | 3 | 2 | 3 | 71  | 5 |
| 1 | 1 | 1 | 3 | 3 | 1 | 1 | 50  | 5 |
| 3 | 3 | 3 | 3 | 3 | 3 | 3 | 90  | 3 |
| 3 | 4 | 2 | 3 | 2 | 3 | 3 | 81  | 4 |

|   |   |   |   |   |   |   |     |   |
|---|---|---|---|---|---|---|-----|---|
| 2 | 3 | 2 | 3 | 4 | 2 | 4 | 92  | 5 |
| 3 | 2 | 2 | 2 | 2 | 3 | 3 | 78  | 5 |
| 3 | 2 | 3 | 3 | 3 | 3 | 4 | 92  | 5 |
| 2 | 2 | 1 | 3 | 3 | 2 | 3 | 74  | 5 |
| 1 | 1 | 4 | 4 | 1 | 1 | 4 | 69  | 3 |
| 3 | 1 | 1 | 4 | 4 | 4 | 4 | 82  | 5 |
| 3 | 2 | 3 | 2 | 4 | 3 | 3 | 86  | 4 |
| 3 | 2 | 2 | 3 | 3 | 3 | 2 | 76  | 5 |
| 3 | 2 | 3 | 3 | 3 | 3 | 3 | 85  | 5 |
| 1 | 3 | 1 | 1 | 1 | 1 | 2 | 61  | 5 |
| 4 | 4 | 4 | 4 | 4 | 4 | 4 | 117 | 1 |
| 4 | 4 | 4 | 4 | 4 | 4 | 4 | 120 | 1 |
| 1 | 2 | 1 | 2 | 3 | 2 | 2 | 68  | 5 |
| 2 | 2 | 2 | 3 | 2 | 2 | 2 | 77  | 5 |
| 1 | 1 | 1 | 1 | 4 | 1 | 1 | 72  | 5 |
| 4 | 3 | 3 | 4 | 4 | 4 | 3 | 102 | 5 |
| 2 | 3 | 2 | 2 | 3 | 2 | 3 | 68  | 5 |
| 3 | 3 | 3 | 2 | 3 | 3 | 3 | 89  | 4 |
| 3 | 2 | 3 | 2 | 2 | 3 | 3 | 77  | 5 |
| 2 | 1 | 1 | 1 | 2 | 1 | 3 | 62  | 5 |
| 4 | 4 | 4 | 4 | 4 | 4 | 4 | 120 | 5 |
| 3 | 3 | 3 | 3 | 3 | 3 | 3 | 91  | 5 |
| 2 | 2 | 2 | 2 | 2 | 3 | 2 | 70  | 5 |
| 1 | 1 | 1 | 1 | 4 | 1 | 4 | 70  | 5 |
| 2 | 4 | 4 | 2 | 3 | 2 | 3 | 89  | 4 |
| 3 | 3 | 3 | 3 | 4 | 3 | 3 | 92  | 5 |
| 1 | 1 | 1 | 1 | 3 | 1 | 4 | 76  | 3 |
| 4 | 2 | 3 | 4 | 4 | 4 | 4 | 109 | 5 |
| 4 | 4 | 3 | 4 | 4 | 4 | 4 | 108 | 5 |
| 4 | 3 | 2 | 2 | 2 | 2 | 2 | 68  | 5 |
| 3 | 1 | 2 | 1 | 3 | 2 | 3 | 65  | 5 |
| 3 | 2 | 2 | 3 | 3 | 3 | 3 | 80  | 3 |
| 3 | 3 | 3 | 3 | 3 | 3 | 3 | 90  | 5 |
| 2 | 2 | 2 | 2 | 2 | 2 | 2 | 64  | 1 |
| 1 | 4 | 4 | 4 | 4 | 4 | 4 | 85  | 4 |
| 1 | 1 | 1 | 1 | 4 | 1 | 4 | 70  | 5 |
| 3 | 2 | 2 | 3 | 3 | 2 | 3 | 79  | 5 |
| 1 | 1 | 1 | 3 | 3 | 1 | 4 | 74  | 5 |
| 2 | 2 | 1 | 2 | 3 | 2 | 3 | 76  | 5 |
| 4 | 3 | 2 | 2 | 2 | 2 | 2 | 70  | 5 |
| 3 | 3 | 3 | 3 | 3 | 3 | 3 | 88  | 5 |
| 3 | 1 | 2 | 2 | 4 | 3 | 4 | 78  | 5 |
| 4 | 4 | 4 | 4 | 4 | 4 | 4 | 120 | 5 |
| 1 | 3 | 1 | 1 | 3 | 1 | 3 | 63  | 5 |
| 1 | 2 | 1 | 1 | 3 | 1 | 3 | 73  | 5 |
| 1 | 1 | 1 | 2 | 3 | 2 | 3 | 67  | 5 |
| 2 | 3 | 2 | 3 | 4 | 2 | 3 | 84  | 5 |
| 1 | 4 | 1 | 4 | 3 | 3 | 4 | 87  | 4 |
| 2 | 4 | 1 | 4 | 3 | 3 | 3 | 73  | 5 |
| 2 | 3 | 3 | 3 | 4 | 3 | 4 | 107 | 5 |
| 1 | 1 | 1 | 1 | 4 | 1 | 4 | 74  | 5 |
| 4 | 2 | 1 | 1 | 3 | 1 | 4 | 71  | 5 |
| 1 | 1 | 1 | 1 | 1 | 1 | 1 | 48  | 5 |
| 2 | 2 | 1 | 2 | 2 | 1 | 3 | 65  | 5 |

|   |   |   |   |   |   |   |     |   |
|---|---|---|---|---|---|---|-----|---|
| 2 | 2 | 1 | 3 | 3 | 3 | 3 | 70  | 4 |
| 2 | 2 | 3 | 3 | 2 | 2 | 2 | 80  | 5 |
| 2 | 2 | 2 | 2 | 2 | 2 | 2 | 60  | 5 |
| 1 | 4 | 1 | 1 | 3 | 1 | 3 | 63  | 5 |
| 3 | 3 | 3 | 3 | 3 | 3 | 3 | 91  | 5 |
| 2 | 2 | 2 | 2 | 2 | 2 | 3 | 74  | 5 |
| 1 | 1 | 1 | 1 | 1 | 1 | 1 | 41  | 1 |
| 4 | 4 | 4 | 4 | 4 | 4 | 4 | 120 | 5 |
| 3 | 3 | 2 | 2 | 2 | 2 | 4 | 78  | 4 |
| 2 | 3 | 2 | 2 | 3 | 2 | 3 | 79  | 5 |
| 2 | 3 | 2 | 2 | 3 | 2 | 3 | 79  | 5 |
| 4 | 3 | 2 | 3 | 4 | 4 | 2 | 104 | 4 |
| 3 | 2 | 2 | 4 | 1 | 3 | 3 | 72  | 5 |
| 2 | 2 | 2 | 2 | 3 | 2 | 3 | 66  | 5 |
| 4 | 2 | 3 | 1 | 4 | 3 | 4 | 90  | 5 |
| 1 | 1 | 1 | 1 | 4 | 1 | 1 | 54  | 5 |
| 1 | 1 | 1 | 1 | 2 | 1 | 3 | 59  | 5 |
| 2 | 2 | 1 | 1 | 1 | 1 | 4 | 62  | 5 |
| 4 | 2 | 3 | 3 | 2 | 4 | 4 | 97  | 5 |
| 1 | 1 | 1 | 1 | 1 | 1 | 3 | 66  | 5 |
| 3 | 2 | 2 | 4 | 3 | 3 | 3 | 83  | 5 |
| 3 | 2 | 1 | 2 | 3 | 2 | 3 | 90  | 5 |
| 1 | 1 | 1 | 1 | 4 | 1 | 1 | 51  | 5 |
| 1 | 2 | 1 | 2 | 4 | 1 | 4 | 78  | 5 |
| 4 | 1 | 1 | 4 | 3 | 3 | 4 | 82  | 5 |
| 2 | 2 | 2 | 2 | 2 | 2 | 3 | 66  | 5 |
| 1 | 2 | 2 | 2 | 4 | 3 | 3 | 67  | 5 |
| 3 | 1 | 1 | 1 | 1 | 1 | 4 | 57  | 5 |
| 3 | 3 | 3 | 3 | 3 | 3 | 3 | 91  | 5 |
| 1 | 4 | 1 | 1 | 4 | 1 | 4 | 78  | 1 |
| 3 | 3 | 2 | 4 | 3 | 1 | 2 | 73  | 5 |
| 3 | 1 | 1 | 1 | 4 | 1 | 3 | 73  | 5 |
| 2 | 2 | 2 | 2 | 2 | 3 | 4 | 73  | 4 |
| 1 | 2 | 1 | 2 | 3 | 1 | 3 | 70  | 4 |
| 1 | 1 | 1 | 3 | 3 | 1 | 4 | 88  | 5 |
| 3 | 2 | 1 | 1 | 4 | 3 | 3 | 66  | 5 |
| 3 | 2 | 2 | 2 | 2 | 2 | 3 | 73  | 3 |
| 1 | 2 | 1 | 2 | 3 | 1 | 4 | 78  | 5 |
| 4 | 4 | 4 | 4 | 4 | 4 | 4 | 94  | 5 |
| 2 | 1 | 2 | 2 | 3 | 2 | 3 | 69  | 5 |
| 1 | 1 | 1 | 1 | 2 | 1 | 2 | 51  | 5 |
| 3 | 1 | 2 | 3 | 3 | 2 | 2 | 73  | 5 |
| 1 | 1 | 1 | 1 | 4 | 1 | 4 | 78  | 5 |
| 2 | 3 | 2 | 2 | 2 | 2 | 2 | 70  | 5 |
| 1 | 1 | 1 | 1 | 3 | 1 | 2 | 59  | 5 |
| 2 | 1 | 2 | 3 | 3 | 2 | 4 | 76  | 4 |
| 1 | 1 | 1 | 1 | 3 | 1 | 4 | 57  | 5 |
| 2 | 3 | 2 | 3 | 4 | 3 | 2 | 90  | 5 |
| 1 | 1 | 1 | 3 | 3 | 1 | 2 | 64  | 5 |
| 2 | 1 | 1 | 2 | 3 | 1 | 3 | 63  | 5 |
| 1 | 1 | 1 | 1 | 1 | 1 | 4 | 58  | 1 |
| 1 | 1 | 1 | 1 | 1 | 1 | 3 | 59  | 5 |
| 3 | 2 | 2 | 3 | 2 | 3 | 2 | 70  | 5 |
| 2 | 1 | 1 | 2 | 3 | 1 | 4 | 69  | 5 |







| B2 | B3 | B4 | B5 | B6 | B7 | B8 | B9 | B10 |   |
|----|----|----|----|----|----|----|----|-----|---|
| 4  | 4  | 1  | 5  | 5  | 5  | 5  | 5  | 5   | 5 |
| 1  | 3  | 1  | 2  | 4  | 3  | 2  | 5  | 5   | 5 |
| 5  | 5  | 5  | 5  | 5  | 5  | 5  | 5  | 5   | 5 |
| 5  | 5  | 5  | 5  | 4  | 5  | 5  | 5  | 4   | 4 |
| 5  | 5  | 1  | 5  | 5  | 1  | 1  | 3  | 1   | 1 |
| 5  | 5  | 5  | 5  | 5  | 5  | 5  | 5  | 5   | 5 |
| 2  | 2  | 5  | 2  | 3  | 2  | 2  | 2  | 4   | 4 |
| 2  | 1  | 1  | 3  | 2  | 3  | 4  | 4  | 5   | 5 |
| 1  | 3  | 1  | 2  | 4  | 2  | 3  | 2  | 1   | 1 |
| 5  | 5  | 1  | 5  | 5  | 5  | 5  | 5  | 5   | 5 |
| 3  | 1  | 1  | 3  | 4  | 4  | 4  | 4  | 3   | 3 |
| 4  | 3  | 4  | 3  | 4  | 4  | 4  | 4  | 4   | 4 |
| 5  | 5  | 1  | 3  | 5  | 5  | 5  | 5  | 5   | 5 |
| 2  | 1  | 5  | 1  | 3  | 5  | 5  | 5  | 5   | 5 |
| 5  | 5  | 5  | 5  | 5  | 5  | 4  | 5  | 3   | 3 |
| 1  | 1  | 1  | 5  | 1  | 5  | 5  | 3  | 5   | 5 |
| 3  | 3  | 3  | 3  | 3  | 3  | 3  | 3  | 3   | 3 |
| 5  | 5  | 1  | 5  | 5  | 5  | 5  | 5  | 5   | 5 |
| 3  | 2  | 2  | 2  | 2  | 2  | 2  | 3  | 5   | 5 |
| 3  | 2  | 1  | 2  | 2  | 3  | 2  | 4  | 3   | 3 |
| 3  | 2  | 2  | 3  | 3  | 3  | 3  | 2  | 4   | 4 |
| 3  | 1  | 2  | 2  | 2  | 2  | 2  | 4  | 4   | 4 |
| 5  | 5  | 1  | 5  | 5  | 5  | 5  | 5  | 5   | 5 |
| 4  | 2  | 2  | 3  | 4  | 4  | 4  | 2  | 2   | 2 |
| 2  | 3  | 1  | 3  | 3  | 3  | 3  | 4  | 4   | 4 |
| 5  | 5  | 3  | 5  | 5  | 5  | 5  | 4  | 1   | 1 |
| 4  | 4  | 1  | 5  | 5  | 5  | 5  | 3  | 3   | 3 |
| 4  | 3  | 4  | 4  | 4  | 4  | 4  | 2  | 2   | 2 |
| 4  | 3  | 1  | 4  | 4  | 5  | 3  | 1  | 4   | 4 |
| 5  | 3  | 2  | 3  | 3  | 3  | 3  | 4  | 4   | 4 |
| 5  | 5  | 1  | 5  | 5  | 5  | 5  | 5  | 5   | 5 |
| 5  | 5  | 1  | 5  | 5  | 5  | 5  | 5  | 5   | 5 |
| 3  | 3  | 1  | 3  | 4  | 4  | 4  | 5  | 5   | 5 |
| 4  | 4  | 4  | 4  | 4  | 4  | 4  | 4  | 4   | 4 |
| 5  | 3  | 2  | 3  | 4  | 5  | 5  | 4  | 5   | 5 |
| 5  | 5  | 4  | 5  | 5  | 5  | 5  | 5  | 5   | 5 |
| 5  | 5  | 1  | 5  | 5  | 5  | 5  | 5  | 5   | 5 |
| 5  | 5  | 5  | 5  | 5  | 5  | 5  | 5  | 5   | 5 |
| 3  | 4  | 2  | 3  | 3  | 3  | 3  | 3  | 5   | 5 |
| 5  | 5  | 5  | 5  | 5  | 5  | 5  | 5  | 5   | 5 |
| 5  | 5  | 1  | 5  | 5  | 5  | 5  | 5  | 5   | 5 |
| 4  | 4  | 1  | 4  | 4  | 4  | 4  | 4  | 4   | 4 |
| 5  | 5  | 2  | 5  | 5  | 5  | 5  | 2  | 5   | 5 |
| 4  | 4  | 4  | 4  | 4  | 4  | 4  | 4  | 4   | 4 |
| 5  | 5  | 2  | 2  | 5  | 5  | 5  | 2  | 5   | 5 |
| 4  | 4  | 4  | 4  | 4  | 4  | 4  | 4  | 4   | 4 |
| 5  | 5  | 5  | 5  | 5  | 5  | 4  | 4  | 4   | 4 |
| 5  | 5  | 5  | 5  | 5  | 5  | 5  | 5  | 5   | 5 |
| 4  | 3  | 3  | 3  | 3  | 3  | 3  | 3  | 3   | 3 |
| 2  | 3  | 2  | 3  | 3  | 3  | 5  | 4  | 1   | 1 |
| 5  | 5  | 1  | 5  | 5  | 5  | 5  | 5  | 5   | 5 |
| 5  | 5  | 1  | 5  | 5  | 5  | 5  | 5  | 5   | 5 |
| 5  | 5  | 2  | 5  | 5  | 4  | 5  | 3  | 5   | 5 |

|   |   |   |   |   |   |   |   |   |
|---|---|---|---|---|---|---|---|---|
| 3 | 3 | 1 | 3 | 2 | 2 | 2 | 5 | 5 |
| 3 | 3 | 1 | 3 | 4 | 3 | 3 | 3 | 3 |
| 5 | 4 | 4 | 4 | 4 | 3 | 4 | 4 | 4 |
| 5 | 5 | 5 | 5 | 5 | 5 | 5 | 5 | 5 |
| 5 | 5 | 1 | 5 | 5 | 5 | 5 | 3 | 5 |
| 4 | 5 | 1 | 5 | 5 | 5 | 5 | 5 | 5 |
| 5 | 5 | 1 | 5 | 5 | 5 | 5 | 5 | 5 |
| 5 | 5 | 5 | 5 | 5 | 5 | 5 | 5 | 5 |
| 4 | 4 | 5 | 4 | 5 | 4 | 4 | 5 | 5 |
| 4 | 4 | 1 | 5 | 5 | 4 | 4 | 5 | 4 |
| 3 | 3 | 1 | 3 | 5 | 3 | 3 | 4 | 3 |
| 4 | 4 | 1 | 4 | 5 | 3 | 3 | 4 | 5 |
| 5 | 5 | 1 | 5 | 5 | 5 | 5 | 3 | 5 |
| 5 | 5 | 1 | 5 | 1 | 3 | 3 | 3 | 3 |
| 5 | 5 | 1 | 5 | 5 | 5 | 5 | 4 | 5 |
| 3 | 4 | 1 | 3 | 5 | 3 | 3 | 5 | 5 |
| 5 | 5 | 5 | 5 | 5 | 5 | 5 | 5 | 5 |
| 5 | 5 | 1 | 5 | 5 | 5 | 5 | 1 | 5 |
| 5 | 5 | 1 | 5 | 5 | 5 | 5 | 5 | 5 |
| 5 | 5 | 1 | 4 | 4 | 4 | 4 | 5 | 4 |
| 3 | 4 | 2 | 3 | 4 | 4 | 5 | 4 | 5 |
| 5 | 5 | 1 | 5 | 5 | 5 | 5 | 5 | 5 |
| 2 | 2 | 1 | 5 | 3 | 3 | 3 | 4 | 5 |
| 4 | 3 | 1 | 2 | 2 | 2 | 2 | 4 | 3 |
| 5 | 5 | 5 | 5 | 5 | 5 | 5 | 5 | 5 |
| 3 | 3 | 1 | 2 | 4 | 2 | 2 | 1 | 5 |
| 4 | 4 | 1 | 5 | 5 | 4 | 4 | 5 | 5 |
| 3 | 3 | 1 | 3 | 3 | 4 | 3 | 3 | 3 |
| 5 | 4 | 1 | 3 | 3 | 3 | 3 | 5 | 5 |
| 5 | 5 | 1 | 5 | 5 | 5 | 5 | 5 | 5 |
| 3 | 2 | 1 | 3 | 3 | 2 | 2 | 5 | 3 |
| 5 | 3 | 1 | 3 | 3 | 3 | 3 | 5 | 3 |
| 5 | 3 | 1 | 3 | 5 | 5 | 5 | 3 | 5 |
| 3 | 3 | 3 | 2 | 5 | 3 | 3 | 3 | 5 |
| 5 | 4 | 3 | 2 | 5 | 5 | 5 | 1 | 4 |
| 5 | 5 | 1 | 5 | 5 | 5 | 5 | 1 | 5 |
| 5 | 5 | 1 | 5 | 5 | 5 | 5 | 5 | 5 |
| 4 | 4 | 2 | 3 | 3 | 3 | 3 | 3 | 4 |
| 5 | 5 | 1 | 5 | 5 | 5 | 5 | 4 | 5 |
| 5 | 5 | 1 | 5 | 5 | 5 | 5 | 5 | 5 |
| 2 | 2 | 1 | 4 | 3 | 2 | 2 | 3 | 5 |
| 3 | 3 | 3 | 4 | 3 | 4 | 3 | 3 | 3 |
| 1 | 1 | 1 | 1 | 2 | 1 | 1 | 3 | 5 |
| 5 | 5 | 1 | 5 | 5 | 5 | 5 | 5 | 5 |
| 3 | 5 | 1 | 2 | 3 | 3 | 2 | 5 | 2 |
| 4 | 5 | 1 | 4 | 5 | 4 | 4 | 4 | 2 |
| 5 | 5 | 3 | 5 | 5 | 5 | 5 | 5 | 4 |
| 3 | 4 | 1 | 3 | 4 | 3 | 3 | 5 | 5 |
| 5 | 5 | 1 | 5 | 5 | 5 | 5 | 5 | 5 |
| 4 | 3 | 1 | 3 | 5 | 3 | 3 | 2 | 5 |
| 2 | 2 | 4 | 2 | 2 | 2 | 2 | 5 | 5 |
| 5 | 5 | 1 | 5 | 5 | 5 | 5 | 5 | 5 |
| 5 | 5 | 5 | 5 | 5 | 5 | 5 | 5 | 5 |
| 4 | 4 | 1 | 3 | 5 | 2 | 3 | 5 | 5 |

|   |   |   |   |   |   |   |   |   |
|---|---|---|---|---|---|---|---|---|
| 3 | 3 | 3 | 3 | 3 | 3 | 3 | 3 | 3 |
| 2 | 2 | 1 | 3 | 3 | 2 | 2 | 2 | 2 |
| 4 | 5 | 1 | 5 | 5 | 5 | 5 | 1 | 5 |
| 5 | 5 | 1 | 5 | 5 | 5 | 5 | 5 | 5 |
| 5 | 5 | 1 | 5 | 5 | 4 | 4 | 3 | 5 |
| 3 | 3 | 1 | 3 | 5 | 3 | 3 | 4 | 5 |
| 4 | 4 | 1 | 3 | 5 | 3 | 3 | 5 | 4 |
| 4 | 3 | 1 | 4 | 5 | 3 | 3 | 5 | 1 |
| 4 | 4 | 1 | 5 | 5 | 4 | 4 | 5 | 1 |
| 3 | 3 | 4 | 3 | 3 | 3 | 3 | 3 | 3 |
| 4 | 3 | 1 | 4 | 3 | 3 | 2 | 3 | 4 |
| 5 | 5 | 1 | 5 | 5 | 5 | 5 | 1 | 5 |
| 5 | 5 | 1 | 4 | 5 | 5 | 3 | 1 | 5 |
| 4 | 4 | 1 | 5 | 5 | 5 | 5 | 4 | 4 |
| 5 | 5 | 1 | 5 | 5 | 5 | 5 | 1 | 5 |
| 4 | 4 | 1 | 5 | 4 | 4 | 5 | 5 | 5 |
| 4 | 4 | 1 | 4 | 5 | 5 | 5 | 3 | 4 |
| 5 | 5 | 1 | 5 | 5 | 5 | 5 | 3 | 2 |
| 5 | 4 | 1 | 5 | 5 | 4 | 5 | 2 | 5 |
| 5 | 5 | 2 | 5 | 5 | 5 | 4 | 4 | 3 |
| 4 | 4 | 1 | 4 | 2 | 4 | 4 | 3 | 3 |
| 5 | 5 | 1 | 5 | 5 | 5 | 5 | 1 | 5 |
| 5 | 5 | 3 | 5 | 5 | 5 | 5 | 5 | 5 |
| 3 | 3 | 1 | 3 | 4 | 3 | 3 | 3 | 3 |
| 3 | 3 | 1 | 2 | 3 | 2 | 3 | 4 | 5 |
| 2 | 2 | 1 | 2 | 5 | 2 | 2 | 4 | 5 |
| 3 | 4 | 1 | 3 | 3 | 3 | 2 | 5 | 5 |
| 1 | 1 | 1 | 3 | 1 | 1 | 1 | 5 | 5 |
| 3 | 3 | 2 | 2 | 3 | 2 | 2 | 3 | 5 |
| 5 | 5 | 1 | 5 | 5 | 5 | 5 | 5 | 5 |
| 5 | 5 | 5 | 5 | 5 | 5 | 5 | 5 | 5 |
| 3 | 4 | 1 | 3 | 5 | 3 | 3 | 5 | 4 |
| 4 | 4 | 1 | 4 | 4 | 4 | 4 | 2 | 4 |
| 1 | 1 | 1 | 1 | 3 | 1 | 3 | 3 | 5 |
| 5 | 5 | 1 | 5 | 5 | 5 | 5 | 5 | 5 |
| 4 | 3 | 1 | 5 | 5 | 5 | 5 | 5 | 5 |
| 5 | 5 | 1 | 5 | 5 | 5 | 5 | 2 | 5 |
| 5 | 5 | 1 | 5 | 5 | 5 | 5 | 5 | 5 |
| 5 | 5 | 3 | 5 | 5 | 5 | 5 | 3 | 5 |
| 5 | 5 | 3 | 2 | 4 | 3 | 3 | 2 | 5 |
| 5 | 4 | 1 | 5 | 5 | 4 | 4 | 4 | 3 |
| 3 | 5 | 1 | 2 | 5 | 4 | 2 | 5 | 4 |
| 3 | 3 | 1 | 3 | 4 | 3 | 3 | 5 | 3 |
| 2 | 2 | 2 | 2 | 4 | 3 | 3 | 4 | 5 |
| 5 | 5 | 1 | 1 | 5 | 1 | 5 | 1 | 5 |
| 3 | 3 | 1 | 3 | 5 | 5 | 5 | 2 | 5 |
| 3 | 2 | 1 | 2 | 5 | 2 | 2 | 5 | 5 |
| 5 | 4 | 1 | 5 | 5 | 5 | 5 | 5 | 5 |
| 4 | 5 | 1 | 4 | 4 | 4 | 4 | 5 | 5 |
| 3 | 3 | 1 | 3 | 4 | 3 | 3 | 4 | 5 |
| 4 | 3 | 1 | 5 | 5 | 5 | 5 | 4 | 5 |
| 3 | 3 | 1 | 5 | 5 | 5 | 5 | 5 | 5 |
| 3 | 3 | 1 | 3 | 4 | 3 | 3 | 3 | 5 |
| 4 | 4 | 2 | 4 | 4 | 4 | 4 | 3 | 5 |

|   |   |   |   |   |   |   |   |   |
|---|---|---|---|---|---|---|---|---|
| 4 | 4 | 1 | 4 | 5 | 4 | 5 | 4 | 5 |
| 3 | 4 | 1 | 3 | 5 | 3 | 3 | 3 | 5 |
| 4 | 5 | 1 | 5 | 5 | 5 | 5 | 5 | 5 |
| 3 | 3 | 1 | 5 | 5 | 5 | 3 | 5 | 4 |
| 2 | 2 | 1 | 1 | 5 | 4 | 3 | 5 | 5 |
| 5 | 4 | 1 | 5 | 5 | 5 | 5 | 3 | 5 |
| 4 | 5 | 1 | 4 | 5 | 5 | 5 | 4 | 5 |
| 4 | 5 | 2 | 4 | 5 | 4 | 4 | 5 | 5 |
| 1 | 2 | 2 | 1 | 2 | 1 | 1 | 4 | 3 |
| 3 | 2 | 2 | 2 | 4 | 3 | 3 | 1 | 2 |
| 5 | 5 | 1 | 5 | 5 | 5 | 5 | 3 | 5 |
| 3 | 3 | 3 | 5 | 5 | 3 | 3 | 3 | 3 |
| 5 | 5 | 1 | 5 | 5 | 5 | 5 | 2 | 5 |
| 5 | 5 | 1 | 5 | 5 | 5 | 5 | 4 | 5 |
| 3 | 3 | 1 | 3 | 4 | 3 | 3 | 3 | 5 |
| 3 | 3 | 2 | 2 | 5 | 5 | 5 | 1 | 5 |
| 5 | 5 | 2 | 3 | 4 | 5 | 5 | 3 | 4 |
| 3 | 3 | 2 | 3 | 5 | 4 | 4 | 3 | 4 |
| 5 | 5 | 1 | 5 | 5 | 3 | 5 | 3 | 4 |
| 5 | 5 | 1 | 5 | 5 | 5 | 5 | 5 | 5 |
| 2 | 3 | 1 | 3 | 5 | 3 | 3 | 5 | 5 |
| 5 | 5 | 1 | 5 | 5 | 5 | 5 | 5 | 5 |
| 3 | 4 | 1 | 4 | 5 | 4 | 5 | 3 | 5 |
| 5 | 5 | 1 | 5 | 5 | 5 | 5 | 2 | 5 |
| 3 | 1 | 1 | 5 | 5 | 5 | 5 | 5 | 5 |
| 4 | 4 | 1 | 4 | 5 | 5 | 4 | 1 | 5 |
| 4 | 4 | 3 | 3 | 3 | 4 | 3 | 2 | 3 |
| 5 | 5 | 1 | 5 | 5 | 5 | 5 | 5 | 2 |
| 2 | 2 | 1 | 5 | 5 | 1 | 1 | 5 | 5 |
| 5 | 5 | 5 | 5 | 5 | 5 | 5 | 2 | 5 |
| 3 | 2 | 1 | 5 | 5 | 4 | 5 | 5 | 5 |
| 5 | 5 | 1 | 5 | 5 | 5 | 5 | 5 | 5 |
| 5 | 5 | 1 | 5 | 5 | 5 | 5 | 1 | 5 |
| 3 | 3 | 1 | 1 | 5 | 3 | 2 | 5 | 5 |
| 3 | 3 | 1 | 5 | 4 | 5 | 5 | 1 | 1 |
| 4 | 3 | 4 | 3 | 5 | 5 | 5 | 4 | 3 |
| 5 | 4 | 1 | 5 | 5 | 3 | 4 | 3 | 4 |
| 5 | 3 | 4 | 3 | 5 | 5 | 5 | 5 | 5 |
| 3 | 3 | 5 | 3 | 3 | 3 | 3 | 3 | 5 |
| 5 | 5 | 1 | 5 | 5 | 5 | 5 | 5 | 5 |
| 5 | 5 | 5 | 5 | 5 | 5 | 5 | 5 | 5 |
| 5 | 5 | 1 | 5 | 5 | 5 | 5 | 1 | 5 |
| 5 | 3 | 1 | 5 | 5 | 5 | 5 | 1 | 1 |
| 4 | 5 | 1 | 4 | 5 | 5 | 5 | 4 | 5 |
| 3 | 3 | 2 | 3 | 4 | 3 | 3 | 3 | 4 |
| 3 | 3 | 1 | 3 | 4 | 4 | 4 | 5 | 5 |
| 5 | 5 | 5 | 5 | 5 | 5 | 5 | 5 | 5 |
| 5 | 5 | 1 | 5 | 5 | 5 | 5 | 5 | 5 |
| 5 | 5 | 1 | 5 | 5 | 5 | 5 | 5 | 1 |
| 5 | 5 | 1 | 5 | 5 | 5 | 5 | 5 | 5 |
| 5 | 5 | 1 | 4 | 5 | 5 | 5 | 5 | 3 |
| 5 | 5 | 1 | 5 | 5 | 5 | 5 | 5 | 5 |
| 5 | 5 | 1 | 5 | 5 | 5 | 5 | 5 | 5 |
| 3 | 2 | 2 | 3 | 2 | 2 | 4 | 2 | 2 |

|   |   |   |   |   |   |   |   |   |
|---|---|---|---|---|---|---|---|---|
| 3 | 5 | 1 | 5 | 5 | 5 | 5 | 4 | 5 |
| 5 | 3 | 1 | 5 | 5 | 5 | 5 | 1 | 5 |
| 5 | 3 | 1 | 4 | 5 | 5 | 5 | 5 | 5 |
| 5 | 5 | 1 | 5 | 5 | 3 | 3 | 3 | 5 |
| 5 | 4 | 1 | 5 | 5 | 4 | 5 | 5 | 5 |
| 5 | 5 | 1 | 5 | 5 | 5 | 5 | 5 | 5 |
| 5 | 5 | 5 | 5 | 5 | 5 | 5 | 5 | 5 |
| 5 | 5 | 1 | 5 | 5 | 5 | 5 | 5 | 5 |
| 4 | 4 | 2 | 3 | 5 | 4 | 3 | 4 | 5 |
| 3 | 2 | 1 | 3 | 5 | 3 | 3 | 5 | 2 |
| 5 | 5 | 1 | 5 | 5 | 5 | 5 | 5 | 5 |
| 5 | 5 | 1 | 5 | 5 | 5 | 5 | 5 | 5 |
| 5 | 5 | 1 | 5 | 5 | 5 | 5 | 5 | 5 |
| 4 | 3 | 1 | 2 | 2 | 3 | 3 | 5 | 2 |
| 5 | 5 | 1 | 5 | 5 | 5 | 5 | 5 | 5 |
| 5 | 5 | 1 | 5 | 5 | 5 | 5 | 5 | 5 |
| 5 | 5 | 1 | 5 | 5 | 5 | 5 | 3 | 5 |
| 3 | 3 | 3 | 3 | 3 | 3 | 3 | 3 | 3 |
| 2 | 4 | 3 | 2 | 3 | 2 | 3 | 3 | 5 |
| 4 | 5 | 1 | 3 | 4 | 3 | 3 | 5 | 5 |
| 5 | 5 | 1 | 5 | 5 | 5 | 5 | 5 | 5 |
| 5 | 5 | 1 | 5 | 5 | 5 | 5 | 5 | 5 |
| 4 | 4 | 1 | 4 | 5 | 4 | 5 | 5 | 5 |
| 5 | 5 | 1 | 5 | 5 | 5 | 5 | 5 | 5 |
| 3 | 3 | 3 | 3 | 3 | 3 | 3 | 3 | 3 |
| 2 | 2 | 1 | 2 | 2 | 2 | 2 | 5 | 2 |
| 3 | 2 | 1 | 2 | 5 | 5 | 5 | 5 | 5 |
| 5 | 5 | 1 | 5 | 5 | 5 | 5 | 5 | 5 |
| 5 | 5 | 1 | 5 | 5 | 5 | 5 | 5 | 5 |
| 4 | 4 | 1 | 3 | 5 | 3 | 3 | 5 | 5 |
| 4 | 4 | 3 | 3 | 3 | 3 | 3 | 3 | 3 |
| 1 | 1 | 3 | 1 | 1 | 1 | 1 | 5 | 5 |
| 3 | 3 | 4 | 3 | 3 | 3 | 3 | 5 | 5 |
| 5 | 5 | 5 | 5 | 5 | 5 | 5 | 5 | 5 |
| 4 | 3 | 1 | 3 | 5 | 3 | 5 | 3 | 5 |
| 5 | 4 | 1 | 4 | 4 | 4 | 4 | 4 | 5 |
| 3 | 4 | 1 | 3 | 5 | 3 | 5 | 5 | 5 |
| 5 | 5 | 1 | 5 | 5 | 5 | 5 | 2 | 5 |
| 4 | 4 | 4 | 4 | 4 | 4 | 4 | 4 | 4 |
| 5 | 5 | 2 | 5 | 5 | 5 | 5 | 5 | 4 |
| 5 | 5 | 1 | 5 | 5 | 5 | 5 | 5 | 5 |
| 3 | 4 | 1 | 5 | 3 | 3 | 3 | 5 | 4 |
| 3 | 5 | 2 | 4 | 5 | 4 | 4 | 4 | 5 |
| 4 | 4 | 2 | 5 | 5 | 5 | 5 | 5 | 5 |
| 2 | 3 | 1 | 3 | 3 | 3 | 3 | 5 | 4 |
| 5 | 5 | 1 | 5 | 5 | 5 | 5 | 5 | 5 |
| 3 | 3 | 1 | 3 | 4 | 3 | 4 | 5 | 5 |
| 4 | 4 | 1 | 5 | 5 | 5 | 3 | 3 | 5 |
| 5 | 5 | 1 | 5 | 5 | 5 | 5 | 5 | 5 |
| 4 | 2 | 3 | 3 | 3 | 3 | 3 | 3 | 3 |
| 4 | 2 | 3 | 3 | 3 | 3 | 3 | 3 | 3 |
| 5 | 5 | 1 | 5 | 5 | 5 | 5 | 5 | 3 |
| 3 | 3 | 1 | 3 | 3 | 3 | 3 | 3 | 4 |
| 4 | 4 | 1 | 5 | 5 | 5 | 5 | 3 | 5 |



|   |   |   |   |   |   |   |   |   |
|---|---|---|---|---|---|---|---|---|
| 4 | 3 | 1 | 3 | 5 | 4 | 4 | 4 | 4 |
| 4 | 4 | 2 | 4 | 5 | 5 | 4 | 3 | 4 |
| 3 | 2 | 1 | 2 | 2 | 3 | 2 | 4 | 3 |
| 5 | 5 | 1 | 5 | 5 | 5 | 5 | 5 | 5 |
| 5 | 5 | 5 | 5 | 5 | 5 | 5 | 5 | 5 |
| 3 | 4 | 1 | 4 | 3 | 3 | 3 | 3 | 3 |
| 4 | 3 | 1 | 4 | 4 | 5 | 5 | 3 | 5 |
| 4 | 5 | 1 | 4 | 3 | 3 | 4 | 4 | 3 |
| 2 | 2 | 1 | 3 | 3 | 2 | 2 | 3 | 4 |
| 4 | 5 | 4 | 5 | 5 | 5 | 5 | 5 | 5 |
| 4 | 3 | 1 | 3 | 4 | 4 | 4 | 5 | 5 |
| 4 | 4 | 4 | 3 | 3 | 4 | 3 | 3 | 3 |
| 5 | 5 | 1 | 5 | 5 | 5 | 5 | 5 | 5 |
| 4 | 4 | 1 | 5 | 5 | 5 | 5 | 5 | 5 |
| 5 | 4 | 1 | 5 | 5 | 5 | 5 | 5 | 5 |
| 5 | 5 | 5 | 5 | 5 | 5 | 5 | 5 | 5 |
| 5 | 5 | 5 | 5 | 5 | 5 | 5 | 5 | 5 |
| 3 | 3 | 2 | 4 | 4 | 4 | 4 | 2 | 3 |
| 4 | 3 | 3 | 4 | 4 | 3 | 4 | 4 | 4 |
| 2 | 3 | 4 | 2 | 3 | 3 | 3 | 3 | 3 |
| 5 | 5 | 1 | 5 | 5 | 5 | 5 | 3 | 5 |
| 3 | 3 | 3 | 3 | 3 | 3 | 3 | 3 | 3 |
| 4 | 3 | 1 | 4 | 3 | 4 | 3 | 3 | 3 |
| 2 | 2 | 2 | 2 | 5 | 3 | 3 | 5 | 5 |
| 4 | 4 | 1 | 4 | 4 | 3 | 3 | 4 | 4 |
| 5 | 5 | 1 | 3 | 2 | 5 | 3 | 3 | 5 |
| 3 | 2 | 2 | 3 | 3 | 3 | 3 | 3 | 3 |
| 2 | 3 | 2 | 3 | 5 | 3 | 3 | 3 | 5 |
| 2 | 3 | 1 | 3 | 3 | 4 | 4 | 4 | 5 |
| 3 | 3 | 2 | 3 | 3 | 3 | 3 | 4 | 3 |
| 4 | 4 | 1 | 4 | 4 | 3 | 3 | 5 | 4 |
| 3 | 3 | 1 | 3 | 3 | 3 | 3 | 3 | 5 |
| 2 | 2 | 2 | 3 | 3 | 3 | 3 | 2 | 3 |
| 3 | 2 | 1 | 2 | 3 | 2 | 3 | 3 | 1 |
| 4 | 5 | 1 | 5 | 5 | 5 | 5 | 4 | 3 |
| 3 | 3 | 1 | 3 | 2 | 2 | 2 | 2 | 5 |
| 2 | 1 | 1 | 2 | 1 | 1 | 1 | 5 | 3 |
| 3 | 3 | 3 | 3 | 3 | 3 | 3 | 3 | 3 |
| 4 | 4 | 1 | 5 | 5 | 4 | 4 | 4 | 4 |
| 5 | 5 | 5 | 5 | 5 | 5 | 5 | 5 | 5 |
| 3 | 2 | 1 | 5 | 3 | 3 | 3 | 5 | 5 |
| 5 | 5 | 2 | 2 | 2 | 3 | 3 | 3 | 3 |
| 3 | 3 | 1 | 3 | 3 | 3 | 3 | 3 | 4 |
| 2 | 2 | 2 | 2 | 2 | 2 | 2 | 4 | 2 |
| 2 | 2 | 1 | 3 | 5 | 2 | 1 | 5 | 5 |
| 4 | 4 | 2 | 4 | 5 | 5 | 5 | 5 | 5 |
| 2 | 2 | 1 | 3 | 5 | 4 | 3 | 5 | 5 |
| 3 | 3 | 3 | 3 | 3 | 3 | 3 | 4 | 3 |
| 5 | 5 | 3 | 5 | 5 | 5 | 5 | 5 | 5 |
| 4 | 4 | 4 | 4 | 4 | 4 | 4 | 4 | 4 |
| 5 | 5 | 2 | 2 | 5 | 5 | 5 | 2 | 5 |
| 4 | 3 | 3 | 3 | 3 | 3 | 3 | 3 | 3 |
| 2 | 3 | 2 | 3 | 3 | 2 | 3 | 2 | 3 |
| 5 | 4 | 4 | 4 | 4 | 4 | 4 | 4 | 4 |

|   |   |   |   |   |   |   |   |   |
|---|---|---|---|---|---|---|---|---|
| 3 | 4 | 1 | 3 | 2 | 2 | 2 | 3 | 5 |
| 5 | 5 | 2 | 5 | 5 | 5 | 5 | 5 | 5 |
| 2 | 3 | 3 | 2 | 3 | 4 | 3 | 4 | 3 |
| 3 | 3 | 1 | 3 | 3 | 3 | 3 | 3 | 5 |
| 3 | 3 | 1 | 3 | 4 | 3 | 3 | 3 | 4 |
| 5 | 5 | 1 | 5 | 5 | 5 | 5 | 5 | 5 |
| 4 | 3 | 1 | 3 | 3 | 3 | 3 | 4 | 3 |
| 4 | 5 | 1 | 3 | 3 | 5 | 2 | 3 | 5 |
| 4 | 3 | 1 | 5 | 5 | 5 | 5 | 5 | 5 |
| 2 | 2 | 1 | 1 | 1 | 1 | 5 | 5 | 5 |
| 4 | 3 | 1 | 3 | 3 | 3 | 3 | 3 | 3 |
| 3 | 3 | 1 | 3 | 3 | 3 | 3 | 4 | 5 |
| 4 | 4 | 2 | 4 | 4 | 4 | 4 | 4 | 5 |
| 3 | 3 | 2 | 2 | 2 | 3 | 4 | 5 | 4 |
| 3 | 3 | 3 | 3 | 3 | 3 | 3 | 3 | 3 |
| 3 | 3 | 3 | 3 | 3 | 3 | 3 | 2 | 3 |
| 2 | 2 | 2 | 3 | 5 | 4 | 3 | 5 | 5 |
| 4 | 3 | 1 | 3 | 3 | 3 | 4 | 2 | 4 |
| 5 | 5 | 1 | 5 | 5 | 5 | 5 | 5 | 5 |
| 5 | 5 | 4 | 5 | 5 | 5 | 5 | 1 | 5 |
| 5 | 4 | 1 | 5 | 5 | 5 | 3 | 3 | 4 |
| 5 | 5 | 1 | 5 | 5 | 5 | 5 | 5 | 5 |
| 4 | 4 | 1 | 4 | 4 | 4 | 4 | 3 | 3 |
| 4 | 5 | 2 | 5 | 5 | 5 | 5 | 3 | 5 |
| 2 | 1 | 1 | 5 | 5 | 5 | 5 | 1 | 5 |
| 4 | 3 | 3 | 3 | 3 | 3 | 3 | 3 | 3 |
| 5 | 5 | 4 | 3 | 3 | 5 | 5 | 3 | 2 |
| 2 | 2 | 1 | 3 | 3 | 5 | 3 | 2 | 5 |
| 4 | 3 | 1 | 3 | 5 | 3 | 3 | 5 | 5 |
| 3 | 3 | 1 | 3 | 5 | 5 | 3 | 5 | 5 |
| 3 | 3 | 1 | 4 | 5 | 5 | 5 | 4 | 5 |
| 3 | 3 | 3 | 3 | 3 | 3 | 3 | 3 | 3 |
| 4 | 5 | 1 | 4 | 4 | 5 | 4 | 2 | 4 |
| 2 | 5 | 1 | 1 | 4 | 5 | 1 | 1 | 5 |
| 3 | 3 | 1 | 2 | 3 | 1 | 2 | 3 | 5 |
| 2 | 2 | 1 | 1 | 5 | 2 | 1 | 5 | 5 |
| 3 | 3 | 1 | 5 | 5 | 5 | 5 | 2 | 5 |
| 5 | 5 | 1 | 2 | 4 | 3 | 3 | 3 | 3 |
| 5 | 5 | 1 | 3 | 3 | 3 | 3 | 3 | 5 |
| 3 | 2 | 2 | 5 | 5 | 2 | 2 | 5 | 5 |
| 5 | 5 | 1 | 5 | 5 | 5 | 5 | 5 | 5 |
| 2 | 2 | 2 | 2 | 2 | 2 | 2 | 2 | 2 |
| 3 | 2 | 1 | 2 | 2 | 2 | 2 | 3 | 3 |
| 5 | 5 | 2 | 5 | 5 | 4 | 5 | 3 | 5 |
| 4 | 4 | 4 | 4 | 4 | 4 | 4 | 4 | 4 |
| 4 | 4 | 1 | 4 | 5 | 4 | 4 | 5 | 5 |
| 4 | 4 | 1 | 3 | 3 | 3 | 3 | 3 | 3 |
| 5 | 3 | 1 | 1 | 1 | 1 | 3 | 5 | 3 |
| 5 | 5 | 5 | 5 | 5 | 5 | 5 | 5 | 5 |
| 5 | 5 | 1 | 5 | 5 | 5 | 5 | 5 | 5 |
| 1 | 3 | 1 | 5 | 5 | 5 | 5 | 3 | 5 |
| 3 | 3 | 1 | 3 | 3 | 3 | 3 | 3 | 3 |
| 5 | 3 | 1 | 3 | 3 | 3 | 3 | 3 | 4 |
| 4 | 3 | 2 | 4 | 3 | 4 | 3 | 2 | 5 |



|   |   |   |   |   |   |   |   |   |
|---|---|---|---|---|---|---|---|---|
| 3 | 2 | 2 | 1 | 1 | 1 | 1 | 5 | 3 |
| 5 | 3 | 1 | 5 | 5 | 3 | 3 | 5 | 5 |
| 4 | 4 | 1 | 4 | 4 | 4 | 4 | 4 | 4 |
| 4 | 3 | 1 | 3 | 3 | 3 | 3 | 3 | 4 |
| 1 | 1 | 2 | 1 | 1 | 1 | 1 | 2 | 5 |
| 3 | 3 | 1 | 1 | 5 | 3 | 3 | 5 | 5 |
| 4 | 4 | 1 | 3 | 4 | 4 | 4 | 4 | 4 |
| 3 | 3 | 1 | 3 | 3 | 3 | 3 | 3 | 3 |
| 5 | 5 | 2 | 5 | 5 | 5 | 5 | 3 | 3 |
| 5 | 5 | 2 | 5 | 5 | 5 | 5 | 5 | 5 |
| 5 | 5 | 3 | 5 | 5 | 5 | 5 | 5 | 5 |
| 5 | 5 | 5 | 5 | 5 | 5 | 5 | 5 | 5 |
| 2 | 4 | 4 | 3 | 4 | 4 | 5 | 4 | 3 |
| 3 | 2 | 1 | 3 | 3 | 3 | 3 | 2 | 3 |
| 4 | 5 | 1 | 3 | 3 | 3 | 3 | 3 | 3 |
| 5 | 5 | 1 | 5 | 5 | 5 | 5 | 5 | 5 |
| 5 | 5 | 1 | 5 | 5 | 5 | 5 | 5 | 5 |
| 3 | 3 | 2 | 3 | 3 | 3 | 3 | 3 | 3 |
| 3 | 3 | 1 | 3 | 4 | 3 | 3 | 3 | 5 |
| 5 | 4 | 2 | 5 | 5 | 5 | 5 | 5 | 5 |
| 3 | 3 | 1 | 3 | 3 | 3 | 3 | 4 | 4 |
| 5 | 5 | 3 | 3 | 3 | 4 | 4 | 3 | 4 |
| 5 | 5 | 1 | 5 | 5 | 5 | 5 | 1 | 5 |
| 2 | 2 | 4 | 3 | 3 | 3 | 2 | 3 | 3 |
| 2 | 1 | 2 | 1 | 2 | 1 | 2 | 4 | 1 |
| 1 | 1 | 1 | 1 | 3 | 1 | 1 | 1 | 4 |
| 5 | 5 | 2 | 5 | 5 | 5 | 5 | 5 | 5 |
| 4 | 4 | 2 | 3 | 3 | 3 | 3 | 3 | 4 |
| 5 | 5 | 5 | 5 | 5 | 5 | 5 | 5 | 5 |
| 2 | 2 | 2 | 2 | 2 | 2 | 2 | 3 | 4 |
| 4 | 4 | 2 | 4 | 4 | 4 | 4 | 4 | 4 |
| 5 | 5 | 1 | 5 | 5 | 5 | 5 | 1 | 5 |
| 3 | 3 | 2 | 3 | 3 | 3 | 3 | 3 | 4 |
| 4 | 4 | 3 | 3 | 3 | 3 | 3 | 3 | 4 |
| 5 | 5 | 1 | 5 | 5 | 5 | 5 | 1 | 5 |
| 3 | 3 | 2 | 3 | 3 | 3 | 3 | 5 | 4 |
| 5 | 5 | 1 | 5 | 5 | 5 | 5 | 5 | 5 |
| 3 | 3 | 3 | 3 | 3 | 3 | 3 | 3 | 3 |
| 3 | 3 | 3 | 3 | 3 | 3 | 3 | 3 | 3 |
| 5 | 5 | 1 | 5 | 5 | 5 | 5 | 5 | 5 |
| 5 | 4 | 1 | 3 | 3 | 3 | 3 | 3 | 5 |
| 2 | 4 | 1 | 2 | 4 | 2 | 3 | 4 | 5 |
| 3 | 3 | 1 | 5 | 5 | 3 | 3 | 4 | 5 |
| 3 | 5 | 1 | 3 | 4 | 3 | 3 | 5 | 5 |
| 5 | 5 | 1 | 5 | 5 | 5 | 5 | 5 | 5 |
| 5 | 5 | 2 | 5 | 5 | 5 | 5 | 2 | 5 |
| 4 | 5 | 1 | 4 | 3 | 3 | 4 | 4 | 3 |
| 3 | 5 | 2 | 3 | 4 | 4 | 4 | 5 | 3 |
| 1 | 1 | 1 | 1 | 1 | 1 | 1 | 2 | 5 |
| 3 | 4 | 2 | 3 | 3 | 3 | 3 | 3 | 3 |
| 3 | 3 | 3 | 3 | 3 | 3 | 3 | 3 | 3 |
| 1 | 3 | 1 | 2 | 5 | 2 | 2 | 5 | 5 |
| 4 | 3 | 2 | 3 | 4 | 3 | 3 | 5 | 4 |
| 3 | 3 | 1 | 3 | 3 | 3 | 3 | 3 | 5 |

|   |   |   |   |   |   |   |   |   |
|---|---|---|---|---|---|---|---|---|
| 5 | 4 | 4 | 4 | 4 | 4 | 4 | 4 | 4 |
| 5 | 5 | 5 | 5 | 5 | 5 | 5 | 5 | 5 |
| 4 | 4 | 1 | 4 | 4 | 4 | 4 | 1 | 4 |
| 3 | 2 | 4 | 2 | 4 | 2 | 4 | 2 | 4 |
| 4 | 4 | 1 | 5 | 5 | 5 | 5 | 5 | 5 |
| 5 | 5 | 3 | 5 | 5 | 5 | 5 | 5 | 4 |
| 1 | 2 | 1 | 3 | 2 | 1 | 1 | 1 | 3 |
| 3 | 3 | 2 | 3 | 2 | 2 | 2 | 4 | 4 |
| 3 | 3 | 1 | 1 | 3 | 2 | 1 | 3 | 5 |
| 3 | 5 | 1 | 3 | 2 | 2 | 2 | 3 | 5 |
| 2 | 3 | 2 | 3 | 4 | 3 | 3 | 5 | 3 |
| 3 | 5 | 1 | 3 | 3 | 3 | 3 | 4 | 5 |
| 2 | 3 | 1 | 5 | 5 | 5 | 3 | 5 | 5 |
| 3 | 4 | 1 | 2 | 5 | 3 | 3 | 4 | 5 |
| 3 | 3 | 3 | 3 | 3 | 3 | 3 | 3 | 3 |
| 3 | 3 | 1 | 3 | 2 | 2 | 2 | 5 | 5 |
| 2 | 3 | 2 | 2 | 2 | 2 | 2 | 3 | 3 |
| 3 | 3 | 1 | 3 | 3 | 3 | 3 | 4 | 2 |
| 5 | 5 | 1 | 5 | 5 | 5 | 5 | 5 | 5 |
| 3 | 2 | 1 | 2 | 5 | 3 | 3 | 4 | 5 |
| 4 | 5 | 1 | 3 | 3 | 3 | 3 | 3 | 3 |
| 2 | 2 | 1 | 2 | 3 | 3 | 3 | 3 | 3 |
| 3 | 3 | 3 | 3 | 3 | 3 | 3 | 3 | 3 |
| 4 | 4 | 4 | 4 | 4 | 4 | 4 | 4 | 4 |
| 5 | 5 | 1 | 5 | 5 | 5 | 5 | 3 | 5 |
| 3 | 5 | 1 | 1 | 5 | 1 | 1 | 5 | 5 |
| 3 | 5 | 1 | 5 | 5 | 5 | 5 | 5 | 5 |
| 3 | 4 | 2 | 3 | 3 | 3 | 3 | 3 | 3 |
| 4 | 4 | 1 | 2 | 3 | 3 | 4 | 3 | 2 |
| 2 | 3 | 3 | 4 | 5 | 4 | 5 | 3 | 5 |
| 1 | 1 | 1 | 1 | 1 | 1 | 1 | 1 | 1 |
| 3 | 3 | 1 | 3 | 3 | 3 | 3 | 3 | 5 |
| 5 | 5 | 5 | 5 | 5 | 5 | 5 | 5 | 5 |
| 4 | 4 | 4 | 4 | 4 | 4 | 4 | 4 | 4 |
| 3 | 3 | 2 | 4 | 4 | 4 | 4 | 3 | 4 |
| 5 | 5 | 5 | 5 | 5 | 5 | 5 | 5 | 5 |
| 5 | 5 | 5 | 5 | 5 | 5 | 5 | 5 | 5 |
| 5 | 5 | 2 | 5 | 5 | 5 | 5 | 5 | 5 |
| 4 | 5 | 5 | 5 | 5 | 5 | 5 | 5 | 5 |
| 5 | 5 | 3 | 5 | 5 | 5 | 5 | 5 | 5 |
| 4 | 4 | 1 | 4 | 4 | 4 | 4 | 4 | 4 |
| 3 | 4 | 1 | 5 | 4 | 5 | 5 | 5 | 4 |
| 5 | 5 | 1 | 5 | 5 | 5 | 5 | 5 | 5 |
| 3 | 4 | 3 | 3 | 3 | 4 | 4 | 3 | 4 |
| 4 | 4 | 4 | 4 | 4 | 4 | 4 | 4 | 4 |
| 3 | 2 | 2 | 3 | 3 | 3 | 3 | 3 | 4 |
| 4 | 3 | 2 | 3 | 3 | 4 | 4 | 5 | 3 |
| 3 | 3 | 2 | 3 | 4 | 4 | 3 | 5 | 3 |
| 4 | 3 | 2 | 4 | 4 | 4 | 4 | 3 | 4 |
| 5 | 5 | 5 | 5 | 5 | 5 | 5 | 5 | 5 |
| 4 | 4 | 1 | 4 | 4 | 4 | 4 | 4 | 4 |
| 5 | 5 | 1 | 5 | 5 | 5 | 5 | 5 | 5 |
| 5 | 5 | 1 | 5 | 5 | 5 | 5 | 5 | 5 |
| 1 | 1 | 1 | 5 | 5 | 5 | 5 | 3 | 3 |

|   |   |   |   |   |   |   |   |   |
|---|---|---|---|---|---|---|---|---|
| 5 | 5 | 5 | 5 | 5 | 5 | 5 | 5 | 5 |
| 5 | 5 | 1 | 5 | 5 | 5 | 5 | 5 | 5 |
| 4 | 3 | 1 | 4 | 5 | 5 | 5 | 2 | 5 |
| 3 | 3 | 1 | 2 | 3 | 2 | 2 | 5 | 5 |
| 4 | 3 | 3 | 3 | 4 | 3 | 3 | 4 | 5 |
| 5 | 5 | 2 | 5 | 5 | 5 | 5 | 5 | 5 |
| 5 | 5 | 1 | 5 | 5 | 5 | 5 | 5 | 5 |
| 4 | 5 | 1 | 4 | 5 | 5 | 5 | 4 | 5 |
| 4 | 5 | 1 | 3 | 5 | 3 | 3 | 3 | 5 |
| 5 | 5 | 1 | 5 | 5 | 5 | 5 | 5 | 5 |
| 5 | 4 | 1 | 5 | 5 | 5 | 5 | 5 | 5 |
| 3 | 3 | 3 | 3 | 4 | 4 | 3 | 3 | 3 |
| 3 | 4 | 1 | 5 | 5 | 5 | 4 | 5 | 5 |
| 4 | 3 | 3 | 4 | 4 | 4 | 4 | 3 | 4 |
| 4 | 4 | 2 | 3 | 4 | 4 | 4 | 4 | 4 |
| 1 | 2 | 1 | 2 | 2 | 2 | 2 | 2 | 2 |
| 3 | 3 | 2 | 3 | 3 | 3 | 3 | 4 | 4 |
| 3 | 3 | 4 | 3 | 3 | 3 | 3 | 3 | 3 |
| 3 | 4 | 1 | 3 | 3 | 3 | 3 | 1 | 4 |
| 5 | 4 | 1 | 5 | 5 | 5 | 5 | 5 | 5 |
| 5 | 5 | 1 | 5 | 5 | 5 | 5 | 5 | 5 |
| 3 | 3 | 3 | 3 | 3 | 3 | 3 | 5 | 3 |
| 4 | 4 | 3 | 3 | 3 | 3 | 3 | 3 | 3 |
| 3 | 3 | 1 | 3 | 3 | 4 | 3 | 3 | 4 |
| 5 | 5 | 1 | 5 | 5 | 5 | 5 | 5 | 5 |
| 3 | 1 | 1 | 2 | 3 | 1 | 1 | 5 | 5 |
| 4 | 4 | 2 | 3 | 3 | 3 | 3 | 4 | 4 |
| 3 | 3 | 1 | 3 | 2 | 3 | 3 | 4 | 5 |
| 3 | 3 | 1 | 3 | 3 | 3 | 3 | 3 | 3 |
| 3 | 3 | 2 | 2 | 2 | 2 | 2 | 3 | 3 |
| 2 | 4 | 1 | 3 | 4 | 4 | 4 | 4 | 4 |
| 2 | 3 | 4 | 2 | 5 | 3 | 3 | 4 | 5 |
| 5 | 5 | 5 | 5 | 5 | 5 | 5 | 5 | 5 |
| 5 | 5 | 4 | 5 | 5 | 5 | 5 | 3 | 5 |
| 3 | 3 | 1 | 5 | 5 | 5 | 5 | 5 | 5 |
| 4 | 3 | 3 | 4 | 4 | 4 | 4 | 3 | 4 |
| 5 | 5 | 1 | 5 | 5 | 5 | 5 | 5 | 5 |
| 2 | 2 | 2 | 2 | 2 | 2 | 2 | 2 | 2 |
| 5 | 5 | 1 | 5 | 5 | 5 | 5 | 3 | 3 |
| 4 | 4 | 2 | 3 | 5 | 5 | 5 | 5 | 5 |
| 5 | 5 | 5 | 5 | 5 | 5 | 5 | 5 | 5 |
| 5 | 5 | 1 | 1 | 1 | 1 | 1 | 1 | 1 |
| 5 | 5 | 2 | 5 | 5 | 5 | 5 | 4 | 4 |
| 4 | 4 | 1 | 4 | 5 | 5 | 4 | 1 | 5 |
| 5 | 5 | 1 | 5 | 5 | 5 | 5 | 5 | 5 |
| 3 | 2 | 1 | 5 | 2 | 3 | 4 | 1 | 2 |
| 1 | 1 | 1 | 1 | 1 | 1 | 1 | 5 | 1 |
| 5 | 5 | 1 | 3 | 3 | 3 | 3 | 3 | 3 |
| 3 | 3 | 4 | 3 | 3 | 3 | 3 | 3 | 3 |
| 5 | 5 | 1 | 5 | 5 | 5 | 5 | 3 | 5 |
| 4 | 3 | 3 | 4 | 3 | 3 | 3 | 1 | 3 |
| 3 | 3 | 1 | 3 | 4 | 3 | 3 | 5 | 5 |
| 5 | 5 | 5 | 5 | 5 | 5 | 5 | 5 | 5 |
| 5 | 5 | 1 | 5 | 5 | 3 | 3 | 5 | 5 |

|   |   |   |   |   |   |   |   |   |
|---|---|---|---|---|---|---|---|---|
| 5 | 5 | 5 | 5 | 5 | 5 | 5 | 5 | 1 |
| 5 | 5 | 5 | 5 | 5 | 5 | 5 | 5 | 5 |
| 3 | 3 | 1 | 3 | 3 | 3 | 3 | 2 | 3 |
| 4 | 4 | 1 | 3 | 4 | 3 | 4 | 4 | 3 |
| 3 | 3 | 1 | 5 | 5 | 5 | 5 | 5 | 5 |
| 5 | 5 | 1 | 5 | 5 | 5 | 5 | 5 | 5 |
| 3 | 3 | 1 | 2 | 2 | 3 | 3 | 3 | 5 |
| 5 | 5 | 3 | 3 | 3 | 3 | 3 | 5 | 5 |
| 5 | 5 | 5 | 5 | 5 | 5 | 5 | 5 | 5 |
| 5 | 5 | 1 | 5 | 5 | 5 | 5 | 5 | 5 |
| 5 | 5 | 1 | 5 | 5 | 5 | 5 | 5 | 5 |
| 5 | 5 | 3 | 3 | 3 | 3 | 3 | 5 | 5 |
| 5 | 5 | 1 | 5 | 5 | 5 | 5 | 5 | 5 |
| 5 | 5 | 1 | 5 | 5 | 5 | 5 | 5 | 5 |
| 5 | 5 | 5 | 5 | 5 | 5 | 5 | 5 | 5 |
| 4 | 3 | 1 | 1 | 3 | 5 | 5 | 4 | 4 |
| 4 | 1 | 1 | 2 | 5 | 3 | 3 | 5 | 5 |
| 1 | 5 | 1 | 5 | 5 | 5 | 5 | 1 | 1 |
| 5 | 5 | 1 | 5 | 5 | 5 | 5 | 5 | 5 |
| 5 | 5 | 1 | 5 | 5 | 5 | 5 | 5 | 5 |
| 1 | 3 | 3 | 2 | 3 | 1 | 1 | 1 | 3 |
| 5 | 5 | 1 | 5 | 5 | 5 | 5 | 5 | 5 |
| 5 | 5 | 1 | 5 | 5 | 5 | 5 | 5 | 5 |
| 4 | 3 | 1 | 4 | 5 | 5 | 4 | 5 | 1 |
| 5 | 5 | 1 | 5 | 5 | 5 | 4 | 3 | 3 |
| 5 | 5 | 5 | 5 | 5 | 5 | 5 | 5 | 5 |
| 4 | 5 | 1 | 5 | 5 | 5 | 5 | 4 | 5 |
| 3 | 5 | 1 | 4 | 4 | 3 | 3 | 5 | 5 |
| 3 | 5 | 2 | 3 | 3 | 3 | 3 | 3 | 5 |
| 5 | 5 | 1 | 5 | 5 | 5 | 5 | 5 | 5 |
| 3 | 2 | 4 | 3 | 2 | 3 | 4 | 5 | 3 |
| 5 | 5 | 1 | 5 | 5 | 5 | 5 | 5 | 5 |
| 5 | 5 | 1 | 5 | 5 | 5 | 5 | 5 | 5 |
| 4 | 4 | 2 | 5 | 5 | 5 | 5 | 5 | 5 |
| 1 | 1 | 2 | 1 | 3 | 1 | 1 | 3 | 4 |
| 3 | 2 | 1 | 2 | 3 | 3 | 3 | 5 | 1 |
| 3 | 3 | 1 | 3 | 4 | 4 | 3 | 5 | 5 |
| 5 | 5 | 1 | 5 | 5 | 5 | 5 | 5 | 5 |
| 1 | 5 | 1 | 1 | 5 | 5 | 5 | 1 | 5 |
| 4 | 5 | 2 | 4 | 5 | 5 | 5 | 5 | 4 |
| 4 | 4 | 1 | 4 | 4 | 4 | 4 | 4 | 4 |
| 5 | 5 | 1 | 5 | 5 | 5 | 5 | 5 | 5 |
| 5 | 5 | 1 | 5 | 5 | 5 | 5 | 5 | 5 |
| 5 | 5 | 1 | 5 | 5 | 5 | 5 | 4 | 5 |
| 4 | 4 | 1 | 3 | 4 | 3 | 3 | 3 | 5 |
| 4 | 5 | 1 | 5 | 4 | 5 | 4 | 4 | 5 |
| 5 | 5 | 5 | 5 | 5 | 5 | 5 | 5 | 1 |
| 3 | 4 | 1 | 5 | 5 | 2 | 2 | 5 | 5 |
| 3 | 3 | 1 | 2 | 3 | 2 | 2 | 5 | 2 |
| 4 | 3 | 1 | 5 | 5 | 5 | 5 | 5 | 5 |
| 1 | 5 | 1 | 5 | 5 | 5 | 5 | 3 | 5 |
| 4 | 5 | 1 | 5 | 4 | 5 | 4 | 4 | 5 |
| 5 | 5 | 5 | 5 | 5 | 5 | 5 | 5 | 5 |
| 3 | 2 | 1 | 5 | 5 | 2 | 5 | 5 | 5 |

|   |   |   |   |   |   |   |   |   |
|---|---|---|---|---|---|---|---|---|
| 5 | 5 | 1 | 4 | 4 | 4 | 4 | 4 | 4 |
| 5 | 5 | 1 | 5 | 5 | 5 | 5 | 5 | 5 |
| 5 | 5 | 1 | 5 | 5 | 5 | 5 | 5 | 5 |
| 3 | 3 | 1 | 3 | 3 | 3 | 5 | 5 | 5 |
| 5 | 5 | 1 | 5 | 5 | 5 | 5 | 5 | 5 |
| 5 | 5 | 1 | 5 | 5 | 5 | 5 | 5 | 5 |
| 5 | 5 | 1 | 5 | 5 | 5 | 3 | 5 | 5 |
| 4 | 1 | 1 | 2 | 1 | 1 | 1 | 1 | 1 |
| 5 | 5 | 1 | 5 | 5 | 5 | 5 | 3 | 5 |
| 5 | 5 | 1 | 5 | 5 | 5 | 5 | 5 | 5 |
| 5 | 5 | 1 | 5 | 5 | 5 | 5 | 5 | 5 |
| 4 | 5 | 1 | 5 | 5 | 3 | 5 | 5 | 4 |
| 5 | 5 | 1 | 5 | 5 | 5 | 5 | 5 | 5 |
| 4 | 4 | 4 | 4 | 4 | 4 | 4 | 4 | 5 |
| 4 | 4 | 2 | 2 | 5 | 2 | 2 | 3 | 3 |
| 5 | 5 | 1 | 5 | 5 | 5 | 5 | 5 | 5 |
| 4 | 4 | 2 | 2 | 5 | 2 | 2 | 3 | 3 |
| 5 | 5 | 5 | 5 | 5 | 5 | 5 | 5 | 5 |
| 5 | 5 | 1 | 5 | 5 | 5 | 5 | 5 | 3 |
| 4 | 4 | 1 | 3 | 4 | 3 | 3 | 3 | 3 |
| 4 | 4 | 1 | 4 | 3 | 3 | 3 | 5 | 5 |
| 4 | 4 | 4 | 4 | 4 | 4 | 4 | 4 | 4 |
| 5 | 5 | 1 | 5 | 5 | 5 | 5 | 5 | 5 |
| 5 | 5 | 1 | 5 | 5 | 5 | 5 | 1 | 5 |
| 2 | 2 | 2 | 2 | 2 | 2 | 2 | 2 | 2 |
| 4 | 4 | 2 | 3 | 3 | 3 | 2 | 4 | 4 |
| 3 | 2 | 4 | 2 | 2 | 4 | 4 | 2 | 3 |
| 3 | 3 | 1 | 2 | 2 | 2 | 2 | 4 | 3 |
| 2 | 2 | 1 | 3 | 3 | 5 | 3 | 2 | 5 |
| 3 | 3 | 1 | 2 | 5 | 2 | 2 | 3 | 2 |
| 3 | 3 | 1 | 3 | 3 | 3 | 3 | 5 | 5 |
| 3 | 5 | 1 | 5 | 5 | 5 | 5 | 5 | 1 |
| 5 | 5 | 1 | 5 | 5 | 5 | 5 | 5 | 5 |
| 2 | 4 | 2 | 2 | 3 | 2 | 2 | 4 | 5 |
| 5 | 5 | 1 | 5 | 5 | 5 | 5 | 1 | 5 |
| 3 | 3 | 2 | 3 | 3 | 3 | 3 | 4 | 4 |
| 3 | 3 | 1 | 3 | 3 | 3 | 3 | 4 | 4 |
| 2 | 2 | 1 | 5 | 5 | 3 | 2 | 3 | 2 |
| 3 | 4 | 1 | 4 | 4 | 3 | 3 | 3 | 3 |
| 4 | 4 | 4 | 4 | 4 | 4 | 4 | 4 | 4 |
| 4 | 4 | 1 | 1 | 4 | 3 | 3 | 5 | 5 |
| 5 | 5 | 1 | 5 | 5 | 5 | 5 | 5 | 5 |
| 5 | 5 | 2 | 5 | 5 | 5 | 5 | 2 | 5 |
| 2 | 2 | 4 | 2 | 3 | 1 | 1 | 3 | 3 |
| 2 | 2 | 2 | 2 | 2 | 3 | 2 | 5 | 4 |
| 5 | 5 | 1 | 5 | 5 | 5 | 5 | 5 | 5 |
| 3 | 4 | 2 | 3 | 4 | 3 | 3 | 4 | 3 |
| 5 | 5 | 2 | 5 | 5 | 5 | 5 | 3 | 5 |
| 3 | 5 | 4 | 3 | 3 | 3 | 3 | 3 | 5 |
| 2 | 3 | 1 | 1 | 3 | 2 | 2 | 4 | 5 |
| 3 | 4 | 1 | 3 | 3 | 3 | 3 | 2 | 5 |
| 5 | 5 | 1 | 5 | 5 | 5 | 5 | 3 | 5 |
| 3 | 3 | 3 | 3 | 3 | 3 | 3 | 3 | 3 |
| 2 | 3 | 2 | 4 | 3 | 3 | 2 | 4 | 3 |

|   |   |   |   |   |   |   |   |   |
|---|---|---|---|---|---|---|---|---|
| 3 | 4 | 1 | 3 | 3 | 3 | 3 | 1 | 3 |
| 4 | 4 | 1 | 3 | 3 | 4 | 3 | 5 | 4 |
| 4 | 3 | 1 | 2 | 3 | 3 | 4 | 4 | 5 |
| 5 | 5 | 1 | 5 | 5 | 4 | 4 | 3 | 4 |
| 2 | 1 | 1 | 1 | 1 | 1 | 1 | 2 | 2 |
| 2 | 5 | 1 | 1 | 5 | 5 | 1 | 2 | 5 |
| 3 | 3 | 3 | 2 | 5 | 3 | 4 | 2 | 4 |
| 3 | 3 | 1 | 4 | 4 | 4 | 3 | 1 | 4 |
| 3 | 3 | 1 | 5 | 5 | 5 | 3 | 5 | 4 |
| 5 | 5 | 1 | 5 | 5 | 1 | 1 | 2 | 3 |
| 5 | 5 | 1 | 5 | 5 | 5 | 5 | 5 | 5 |
| 1 | 1 | 1 | 1 | 1 | 1 | 1 | 1 | 1 |
| 5 | 5 | 1 | 5 | 4 | 5 | 3 | 4 | 3 |
| 3 | 3 | 1 | 5 | 5 | 3 | 3 | 4 | 5 |
| 5 | 5 | 1 | 5 | 5 | 5 | 5 | 5 | 5 |
| 4 | 3 | 1 | 5 | 5 | 4 | 4 | 5 | 5 |
| 3 | 4 | 1 | 3 | 3 | 3 | 3 | 3 | 5 |
| 1 | 3 | 3 | 2 | 3 | 2 | 3 | 3 | 2 |
| 3 | 3 | 1 | 3 | 3 | 3 | 3 | 5 | 4 |
| 2 | 4 | 3 | 3 | 2 | 2 | 2 | 5 | 4 |
| 5 | 5 | 5 | 5 | 5 | 5 | 5 | 5 | 5 |
| 3 | 3 | 1 | 3 | 3 | 3 | 3 | 4 | 3 |
| 3 | 3 | 3 | 3 | 3 | 3 | 3 | 3 | 3 |
| 4 | 4 | 1 | 4 | 4 | 5 | 3 | 3 | 3 |
| 3 | 4 | 3 | 3 | 4 | 4 | 4 | 5 | 4 |
| 3 | 3 | 1 | 3 | 5 | 3 | 2 | 4 | 5 |
| 1 | 1 | 1 | 1 | 5 | 1 | 1 | 3 | 3 |
| 1 | 1 | 1 | 1 | 1 | 1 | 1 | 3 | 4 |
| 5 | 2 | 4 | 2 | 2 | 2 | 2 | 2 | 4 |
| 3 | 3 | 3 | 2 | 3 | 3 | 2 | 3 | 4 |
| 4 | 4 | 1 | 5 | 5 | 4 | 4 | 5 | 5 |
| 3 | 3 | 3 | 4 | 4 | 4 | 4 | 4 | 4 |
| 4 | 4 | 1 | 5 | 5 | 5 | 4 | 5 | 5 |
| 5 | 5 | 1 | 5 | 5 | 5 | 5 | 5 | 5 |
| 1 | 1 | 3 | 1 | 4 | 4 | 1 | 4 | 1 |
| 4 | 4 | 1 | 4 | 4 | 5 | 3 | 3 | 3 |
| 4 | 4 | 1 | 3 | 4 | 4 | 3 | 3 | 4 |
| 3 | 3 | 4 | 3 | 5 | 4 | 3 | 4 | 5 |
| 3 | 3 | 3 | 2 | 3 | 3 | 3 | 3 | 3 |
| 2 | 2 | 5 | 3 | 2 | 2 | 2 | 2 | 2 |
| 4 | 4 | 4 | 4 | 4 | 4 | 4 | 4 | 4 |
| 5 | 5 | 1 | 4 | 5 | 4 | 4 | 4 | 5 |
| 5 | 5 | 1 | 5 | 5 | 5 | 5 | 5 | 5 |
| 3 | 4 | 1 | 3 | 3 | 3 | 4 | 4 | 5 |
| 4 | 5 | 1 | 4 | 5 | 4 | 4 | 3 | 3 |
| 4 | 5 | 1 | 4 | 4 | 3 | 3 | 5 | 5 |
| 3 | 3 | 2 | 3 | 4 | 4 | 4 | 4 | 4 |
| 2 | 3 | 2 | 2 | 3 | 3 | 3 | 2 | 4 |
| 3 | 3 | 1 | 3 | 3 | 2 | 2 | 1 | 2 |
| 1 | 2 | 1 | 3 | 3 | 2 | 2 | 3 | 2 |
| 5 | 5 | 1 | 5 | 5 | 5 | 5 | 4 | 5 |
| 5 | 5 | 1 | 5 | 5 | 5 | 5 | 5 | 4 |
| 5 | 5 | 1 | 5 | 5 | 3 | 3 | 4 | 4 |
| 4 | 4 | 2 | 4 | 5 | 5 | 4 | 2 | 5 |

|   |   |   |   |   |   |   |   |   |
|---|---|---|---|---|---|---|---|---|
| 4 | 3 | 1 | 3 | 4 | 4 | 3 | 4 | 4 |
| 3 | 3 | 3 | 3 | 3 | 4 | 3 | 3 | 3 |
| 5 | 5 | 1 | 5 | 5 | 5 | 5 | 5 | 5 |
| 4 | 4 | 1 | 4 | 4 | 4 | 4 | 4 | 5 |
| 5 | 5 | 1 | 3 | 5 | 3 | 3 | 4 | 4 |
| 4 | 4 | 1 | 3 | 2 | 3 | 3 | 3 | 3 |
| 5 | 5 | 1 | 5 | 5 | 5 | 5 | 5 | 5 |
| 4 | 3 | 1 | 4 | 5 | 5 | 5 | 3 | 5 |
| 2 | 2 | 1 | 4 | 4 | 4 | 5 | 2 | 5 |
| 2 | 2 | 2 | 5 | 5 | 2 | 2 | 5 | 4 |
| 2 | 2 | 2 | 5 | 5 | 2 | 2 | 5 | 4 |
| 4 | 3 | 4 | 4 | 5 | 5 | 3 | 4 | 5 |
| 3 | 3 | 3 | 2 | 4 | 3 | 4 | 5 | 5 |
| 4 | 4 | 2 | 3 | 5 | 3 | 3 | 3 | 3 |
| 5 | 3 | 1 | 5 | 5 | 5 | 5 | 4 | 5 |
| 5 | 5 | 1 | 5 | 5 | 5 | 5 | 5 | 5 |
| 5 | 5 | 5 | 5 | 5 | 5 | 5 | 5 | 5 |
| 4 | 4 | 1 | 5 | 5 | 5 | 5 | 5 | 5 |
| 3 | 4 | 2 | 2 | 3 | 3 | 5 | 5 | 5 |
| 4 | 3 | 1 | 5 | 4 | 3 | 4 | 3 | 5 |
| 3 | 3 | 1 | 5 | 5 | 5 | 5 | 4 | 5 |
| 5 | 5 | 1 | 5 | 5 | 4 | 3 | 5 | 5 |
| 5 | 5 | 1 | 5 | 5 | 5 | 5 | 5 | 5 |
| 5 | 5 | 2 | 5 | 5 | 5 | 5 | 3 | 5 |
| 5 | 5 | 1 | 4 | 5 | 5 | 5 | 5 | 5 |
| 2 | 1 | 1 | 1 | 2 | 2 | 1 | 4 | 2 |
| 4 | 4 | 1 | 5 | 5 | 5 | 5 | 3 | 5 |
| 5 | 5 | 1 | 5 | 5 | 5 | 5 | 3 | 5 |
| 3 | 3 | 1 | 3 | 2 | 2 | 2 | 4 | 4 |
| 5 | 5 | 1 | 5 | 5 | 5 | 5 | 5 | 5 |
| 3 | 2 | 1 | 3 | 5 | 4 | 2 | 5 | 5 |
| 5 | 4 | 1 | 5 | 5 | 4 | 4 | 5 | 5 |
| 5 | 5 | 2 | 5 | 5 | 5 | 5 | 2 | 5 |
| 3 | 2 | 2 | 2 | 4 | 4 | 5 | 5 | 5 |
| 3 | 3 | 1 | 3 | 5 | 5 | 4 | 5 | 5 |
| 3 | 4 | 1 | 5 | 5 | 5 | 5 | 4 | 5 |
| 3 | 3 | 3 | 2 | 3 | 2 | 3 | 4 | 4 |
| 4 | 3 | 2 | 3 | 3 | 2 | 2 | 4 | 1 |
| 5 | 5 | 5 | 5 | 5 | 1 | 5 | 5 | 5 |
| 5 | 5 | 1 | 5 | 5 | 5 | 5 | 5 | 5 |
| 3 | 5 | 2 | 5 | 5 | 5 | 5 | 5 | 5 |
| 5 | 4 | 2 | 3 | 3 | 3 | 3 | 5 | 5 |
| 5 | 1 | 1 | 1 | 1 | 1 | 1 | 1 | 1 |
| 5 | 5 | 5 | 5 | 5 | 5 | 5 | 5 | 5 |
| 3 | 3 | 3 | 3 | 5 | 3 | 3 | 3 | 5 |
| 3 | 3 | 3 | 2 | 3 | 3 | 2 | 4 | 4 |
| 3 | 2 | 2 | 2 | 4 | 4 | 5 | 5 | 5 |
| 3 | 3 | 1 | 3 | 3 | 3 | 3 | 3 | 5 |
| 4 | 4 | 1 | 4 | 4 | 4 | 4 | 4 | 4 |
| 3 | 3 | 1 | 4 | 4 | 3 | 4 | 2 | 4 |
| 4 | 3 | 1 | 3 | 5 | 3 | 4 | 5 | 5 |
| 5 | 5 | 1 | 5 | 5 | 5 | 5 | 3 | 5 |
| 4 | 3 | 1 | 4 | 4 | 5 | 3 | 5 | 5 |
| 5 | 4 | 1 | 5 | 5 | 5 | 5 | 3 | 5 |







| B11 | B12 | B13 | Health Behavior | C1 | C2 | C3 | C4 | C5 |
|-----|-----|-----|-----------------|----|----|----|----|----|
| 5   | 5   | 5   | 59              | 5  | 5  | 5  | 5  | 5  |
| 3   | 5   | 1   | 40              | 2  | 3  | 4  | 1  | 3  |
| 5   | 5   | 5   | 65              | 5  | 4  | 5  | 3  | 5  |
| 5   | 4   | 4   | 61              | 1  | 5  | 5  | 5  | 3  |
| 5   | 5   | 5   | 47              | 2  | 5  | 4  | 3  | 3  |
| 5   | 5   | 5   | 65              | 2  | 4  | 5  | 5  | 5  |
| 3   | 2   | 5   | 37              | 2  | 4  | 5  | 2  | 2  |
| 5   | 5   | 2   | 39              | 1  | 4  | 4  | 2  | 2  |
| 4   | 5   | 3   | 36              | 5  | 3  | 4  | 2  | 2  |
| 5   | 5   | 5   | 61              | 1  | 5  | 5  | 5  | 5  |
| 5   | 4   | 4   | 45              | 1  | 5  | 5  | 5  | 5  |
| 4   | 4   | 4   | 50              | 2  | 4  | 5  | 4  | 2  |
| 5   | 5   | 5   | 59              | 1  | 5  | 5  | 5  | 4  |
| 5   | 5   | 1   | 48              | 5  | 1  | 3  | 2  | 1  |
| 5   | 4   | 5   | 61              | 1  | 4  | 4  | 3  | 1  |
| 1   | 1   | 5   | 39              | 5  | 5  | 5  | 4  | 5  |
| 3   | 3   | 3   | 35              | 2  | 4  | 4  | 3  | 4  |
| 5   | 5   | 5   | 37              | 1  | 5  | 5  | 5  | 5  |
| 3   | 3   | 3   | 36              | 2  | 4  | 4  | 2  | 3  |
| 3   | 4   | 2   | 40              | 1  | 4  | 4  | 2  | 3  |
| 4   | 4   | 4   | 35              | 2  | 4  | 4  | 3  | 4  |
| 2   | 4   | 2   | 61              | 2  | 3  | 3  | 3  | 5  |
| 5   | 5   | 5   | 56              | 1  | 5  | 5  | 5  | 5  |
| 3   | 4   | 4   | 44              | 1  | 5  | 5  | 5  | 5  |
| 5   | 4   | 4   | 58              | 2  | 5  | 5  | 1  | 2  |
| 5   | 5   | 5   | 51              | 1  | 4  | 4  | 4  | 4  |
| 4   | 4   | 3   | 42              | 3  | 3  | 3  | 3  | 2  |
| 3   | 3   | 3   | 45              | 2  | 4  | 4  | 4  | 4  |
| 4   | 4   | 3   | 47              | 1  | 5  | 5  | 5  | 5  |
| 4   | 4   | 4   | 41              | 2  | 3  | 5  | 3  | 4  |
| 5   | 5   | 5   | 60              | 1  | 5  | 5  | 5  | 3  |
| 4   | 5   | 5   | 52              | 1  | 5  | 5  | 5  | 5  |
| 5   | 5   | 5   | 52              | 1  | 5  | 5  | 5  | 3  |
| 4   | 4   | 4   | 51              | 1  | 5  | 5  | 5  | 5  |
| 2   | 3   | 5   | 64              | 2  | 4  | 5  | 4  | 3  |
| 5   | 5   | 5   | 61              | 3  | 5  | 5  | 4  | 4  |
| 5   | 5   | 5   | 34              | 1  | 5  | 5  | 5  | 5  |
| 5   | 5   | 5   | 33              | 5  | 5  | 5  | 5  | 5  |
| 5   | 5   | 5   | 50              | 2  | 5  | 5  | 4  | 4  |
| 5   | 5   | 5   | 56              | 5  | 5  | 5  | 5  | 5  |
| 5   | 5   | 5   | 52              | 1  | 4  | 4  | 5  | 4  |
| 4   | 4   | 4   | 53              | 2  | 4  | 4  | 4  | 4  |
| 5   | 5   | 5   | 34              | 4  | 4  | 4  | 4  | 4  |
| 4   | 4   | 4   | 59              | 2  | 4  | 5  | 5  | 3  |
| 5   | 5   | 5   | 31              | 2  | 4  | 4  | 4  | 2  |
| 4   | 4   | 4   | 65              | 3  | 4  | 4  | 4  | 4  |
| 4   | 4   | 4   | 40              | 1  | 4  | 1  | 4  | 3  |
| 5   | 5   | 5   | 45              | 5  | 5  | 5  | 5  | 5  |
| 3   | 3   | 3   | 61              | 3  | 3  | 3  | 3  | 3  |
| 1   | 4   | 5   | 59              | 1  | 5  | 3  | 3  | 2  |
| 5   | 5   | 5   | 42              | 2  | 1  | 5  | 4  | 3  |
| 5   | 5   | 5   | 43              | 1  | 5  | 5  | 5  | 5  |
| 5   | 5   | 5   | 65              | 1  | 5  | 5  | 5  | 4  |

|   |   |   |    |   |   |   |   |   |
|---|---|---|----|---|---|---|---|---|
| 3 | 3 | 3 | 43 | 2 | 4 | 3 | 3 | 2 |
| 4 | 4 | 3 | 60 | 1 | 4 | 4 | 4 | 4 |
| 4 | 4 | 4 | 61 | 3 | 5 | 5 | 5 | 5 |
| 5 | 5 | 5 | 65 | 1 | 5 | 5 | 5 | 5 |
| 5 | 5 | 5 | 45 | 2 | 5 | 5 | 5 | 1 |
| 5 | 5 | 5 | 55 | 1 | 4 | 4 | 4 | 3 |
| 5 | 5 | 5 | 51 | 1 | 5 | 5 | 5 | 3 |
| 5 | 5 | 5 | 43 | 1 | 5 | 5 | 5 | 5 |
| 5 | 5 | 5 | 59 | 2 | 2 | 4 | 3 | 4 |
| 5 | 5 | 4 | 62 | 1 | 5 | 4 | 3 | 3 |
| 4 | 3 | 3 | 60 | 1 | 4 | 4 | 4 | 4 |
| 5 | 5 | 3 | 50 | 2 | 4 | 4 | 4 | 3 |
| 5 | 5 | 5 | 65 | 1 | 5 | 5 | 5 | 4 |
| 3 | 3 | 3 | 57 | 4 | 5 | 5 | 4 | 5 |
| 5 | 5 | 5 | 43 | 1 | 5 | 5 | 4 | 2 |
| 5 | 5 | 3 | 53 | 1 | 5 | 5 | 3 | 3 |
| 5 | 5 | 5 | 50 | 1 | 5 | 5 | 3 | 5 |
| 5 | 5 | 5 | 61 | 2 | 5 | 5 | 5 | 2 |
| 5 | 5 | 4 | 43 | 4 | 4 | 5 | 4 | 2 |
| 4 | 5 | 3 | 37 | 1 | 4 | 5 | 3 | 3 |
| 4 | 3 | 4 | 65 | 2 | 4 | 4 | 4 | 4 |
| 5 | 5 | 5 | 41 | 1 | 5 | 5 | 4 | 3 |
| 4 | 3 | 3 | 54 | 3 | 4 | 3 | 1 | 1 |
| 3 | 3 | 3 | 45 | 3 | 3 | 4 | 3 | 3 |
| 5 | 5 | 5 | 49 | 3 | 3 | 3 | 3 | 1 |
| 5 | 3 | 5 | 61 | 3 | 4 | 4 | 2 | 2 |
| 4 | 5 | 3 | 37 | 1 | 5 | 5 | 4 | 4 |
| 4 | 5 | 5 | 44 | 3 | 4 | 4 | 3 | 3 |
| 4 | 4 | 4 | 54 | 3 | 3 | 3 | 3 | 3 |
| 5 | 5 | 5 | 45 | 3 | 3 | 3 | 4 | 3 |
| 3 | 2 | 3 | 51 | 3 | 3 | 3 | 2 | 1 |
| 3 | 5 | 2 | 55 | 1 | 5 | 3 | 5 | 3 |
| 5 | 5 | 4 | 61 | 1 | 5 | 5 | 5 | 3 |
| 3 | 4 | 3 | 46 | 3 | 3 | 2 | 3 | 3 |
| 5 | 5 | 5 | 43 | 4 | 4 | 3 | 3 | 4 |
| 5 | 5 | 3 | 61 | 1 | 5 | 5 | 5 | 5 |
| 5 | 5 | 5 | 39 | 1 | 5 | 5 | 4 | 3 |
| 4 | 4 | 4 | 44 | 2 | 4 | 3 | 3 | 3 |
| 5 | 5 | 5 | 27 | 2 | 4 | 4 | 4 | 3 |
| 5 | 5 | 5 | 61 | 1 | 5 | 5 | 5 | 3 |
| 4 | 4 | 2 | 41 | 3 | 2 | 4 | 3 | 2 |
| 4 | 3 | 3 | 49 | 1 | 5 | 4 | 4 | 4 |
| 3 | 1 | 2 | 60 | 3 | 3 | 3 | 3 | 3 |
| 5 | 5 | 5 | 47 | 1 | 5 | 5 | 5 | 2 |
| 3 | 2 | 5 | 61 | 4 | 3 | 4 | 3 | 1 |
| 4 | 4 | 3 | 47 | 2 | 4 | 2 | 3 | 2 |
| 4 | 5 | 4 | 42 | 4 | 4 | 3 | 3 | 3 |
| 5 | 3 | 3 | 41 | 2 | 4 | 5 | 3 | 3 |
| 5 | 5 | 5 | 65 | 1 | 5 | 5 | 5 | 5 |
| 5 | 5 | 3 | 51 | 3 | 4 | 5 | 3 | 3 |
| 5 | 4 | 2 | 39 | 4 | 2 | 4 | 3 | 1 |
| 5 | 5 | 5 | 31 | 2 | 4 | 4 | 4 | 3 |
| 5 | 5 | 5 | 56 | 2 | 2 | 2 | 2 | 2 |
| 5 | 4 | 5 | 31 | 2 | 3 | 4 | 2 | 2 |

|   |   |   |    |   |   |   |   |   |
|---|---|---|----|---|---|---|---|---|
| 3 | 3 | 3 | 53 | 1 | 3 | 3 | 3 | 3 |
| 3 | 2 | 3 | 46 | 3 | 2 | 3 | 1 | 3 |
| 5 | 5 | 5 | 48 | 1 | 5 | 5 | 4 | 4 |
| 5 | 5 | 5 | 48 | 2 | 5 | 5 | 4 | 2 |
| 5 | 5 | 5 | 53 | 1 | 5 | 5 | 5 | 5 |
| 5 | 3 | 3 | 41 | 2 | 5 | 5 | 2 | 4 |
| 4 | 4 | 3 | 43 | 3 | 3 | 4 | 3 | 3 |
| 4 | 5 | 5 | 57 | 2 | 5 | 5 | 3 | 2 |
| 5 | 5 | 5 | 52 | 1 | 5 | 5 | 4 | 4 |
| 3 | 3 | 3 | 57 | 3 | 4 | 3 | 3 | 3 |
| 3 | 4 | 4 | 57 | 2 | 2 | 3 | 3 | 3 |
| 5 | 5 | 5 | 56 | 1 | 5 | 5 | 5 | 4 |
| 5 | 3 | 5 | 52 | 1 | 5 | 5 | 5 | 3 |
| 5 | 5 | 5 | 56 | 2 | 4 | 4 | 4 | 3 |
| 5 | 5 | 5 | 55 | 1 | 5 | 5 | 5 | 4 |
| 5 | 5 | 4 | 45 | 2 | 4 | 5 | 4 | 3 |
| 5 | 5 | 2 | 44 | 2 | 5 | 4 | 4 | 3 |
| 5 | 5 | 5 | 47 | 1 | 5 | 5 | 5 | 2 |
| 5 | 5 | 4 | 46 | 2 | 4 | 4 | 4 | 3 |
| 4 | 4 | 4 | 41 | 2 | 5 | 4 | 3 | 4 |
| 3 | 3 | 4 | 40 | 1 | 5 | 5 | 4 | 2 |
| 5 | 5 | 5 | 39 | 1 | 5 | 5 | 5 | 5 |
| 5 | 5 | 5 | 44 | 4 | 3 | 3 | 5 | 3 |
| 4 | 3 | 3 | 31 | 3 | 4 | 3 | 3 | 3 |
| 3 | 3 | 3 | 41 | 3 | 2 | 4 | 2 | 2 |
| 3 | 3 | 3 | 61 | 3 | 2 | 4 | 1 | 2 |
| 4 | 3 | 3 | 65 | 3 | 4 | 2 | 2 | 1 |
| 4 | 2 | 1 | 47 | 3 | 2 | 2 | 1 | 3 |
| 4 | 4 | 3 | 48 | 3 | 4 | 4 | 2 | 3 |
| 5 | 5 | 5 | 35 | 1 | 5 | 5 | 4 | 3 |
| 5 | 5 | 5 | 61 | 1 | 4 | 4 | 4 | 4 |
| 3 | 5 | 3 | 57 | 2 | 5 | 5 | 3 | 2 |
| 4 | 4 | 4 | 65 | 3 | 3 | 3 | 3 | 1 |
| 3 | 3 | 5 | 63 | 5 | 1 | 1 | 1 | 1 |
| 5 | 5 | 5 | 61 | 1 | 4 | 4 | 3 | 2 |
| 5 | 5 | 4 | 50 | 1 | 5 | 5 | 4 | 3 |
| 5 | 5 | 5 | 44 | 3 | 3 | 3 | 3 | 3 |
| 5 | 5 | 5 | 48 | 1 | 5 | 5 | 5 | 5 |
| 5 | 5 | 5 | 42 | 1 | 1 | 3 | 3 | 4 |
| 5 | 5 | 5 | 41 | 3 | 5 | 5 | 4 | 2 |
| 5 | 5 | 4 | 49 | 1 | 5 | 5 | 4 | 2 |
| 5 | 3 | 4 | 48 | 3 | 3 | 2 | 2 | 1 |
| 3 | 3 | 3 | 36 | 3 | 3 | 3 | 4 | 2 |
| 4 | 3 | 3 | 54 | 3 | 3 | 4 | 2 | 1 |
| 5 | 5 | 5 | 54 | 3 | 5 | 5 | 2 | 1 |
| 5 | 4 | 2 | 44 | 1 | 5 | 5 | 4 | 3 |
| 2 | 1 | 1 | 56 | 2 | 4 | 3 | 1 | 1 |
| 5 | 3 | 5 | 45 | 2 | 5 | 5 | 4 | 3 |
| 5 | 4 | 4 | 44 | 2 | 4 | 4 | 4 | 3 |
| 4 | 3 | 3 | 50 | 2 | 4 | 4 | 2 | 4 |
| 5 | 5 | 4 | 55 | 1 | 5 | 5 | 4 | 4 |
| 5 | 5 | 3 | 47 | 2 | 5 | 5 | 3 | 3 |
| 4 | 4 | 3 | 45 | 3 | 4 | 4 | 3 | 3 |
| 5 | 4 | 3 | 51 | 2 | 4 | 4 | 4 | 4 |

|   |   |   |    |   |   |   |   |   |
|---|---|---|----|---|---|---|---|---|
| 5 | 5 | 4 | 43 | 1 | 5 | 4 | 4 | 3 |
| 5 | 4 | 3 | 54 | 2 | 4 | 4 | 3 | 4 |
| 5 | 5 | 5 | 57 | 1 | 5 | 5 | 4 | 4 |
| 4 | 5 | 3 | 58 | 2 | 4 | 4 | 3 | 2 |
| 4 | 4 | 2 | 31 | 2 | 5 | 5 | 4 | 5 |
| 5 | 5 | 5 | 36 | 4 | 4 | 4 | 4 | 2 |
| 5 | 5 | 4 | 57 | 1 | 4 | 4 | 4 | 3 |
| 5 | 5 | 5 | 45 | 2 | 4 | 4 | 4 | 4 |
| 5 | 3 | 2 | 58 | 3 | 3 | 3 | 2 | 2 |
| 3 | 3 | 4 | 60 | 2 | 4 | 4 | 4 | 1 |
| 5 | 5 | 3 | 44 | 2 | 4 | 4 | 3 | 2 |
| 5 | 3 | 3 | 50 | 1 | 5 | 5 | 5 | 4 |
| 5 | 5 | 5 | 55 | 3 | 3 | 3 | 3 | 3 |
| 5 | 5 | 5 | 46 | 1 | 5 | 5 | 5 | 5 |
| 5 | 4 | 3 | 35 | 2 | 4 | 4 | 3 | 3 |
| 5 | 5 | 5 | 61 | 1 | 5 | 5 | 3 | 3 |
| 4 | 5 | 5 | 45 | 2 | 4 | 5 | 5 | 5 |
| 4 | 3 | 4 | 61 | 2 | 5 | 4 | 4 | 4 |
| 2 | 4 | 3 | 52 | 2 | 2 | 2 | 2 | 2 |
| 5 | 5 | 5 | 54 | 2 | 5 | 5 | 5 | 3 |
| 3 | 4 | 3 | 45 | 2 | 4 | 5 | 4 | 4 |
| 5 | 5 | 5 | 51 | 1 | 5 | 5 | 4 | 5 |
| 5 | 5 | 3 | 42 | 1 | 4 | 4 | 3 | 2 |
| 5 | 5 | 5 | 34 | 1 | 5 | 5 | 5 | 4 |
| 4 | 3 | 1 | 43 | 3 | 2 | 1 | 2 | 1 |
| 5 | 5 | 3 | 62 | 2 | 4 | 4 | 3 | 1 |
| 3 | 3 | 4 | 55 | 2 | 4 | 5 | 4 | 2 |
| 5 | 5 | 1 | 61 | 2 | 4 | 5 | 4 | 2 |
| 5 | 3 | 3 | 55 | 4 | 2 | 2 | 1 | 1 |
| 5 | 5 | 5 | 41 | 1 | 5 | 5 | 5 | 4 |
| 5 | 5 | 5 | 42 | 4 | 4 | 4 | 3 | 3 |
| 5 | 5 | 5 | 52 | 1 | 5 | 5 | 5 | 5 |
| 5 | 5 | 3 | 52 | 1 | 5 | 5 | 5 | 3 |
| 2 | 2 | 4 | 60 | 1 | 4 | 5 | 3 | 2 |
| 1 | 5 | 3 | 51 | 4 | 5 | 5 | 4 | 4 |
| 3 | 3 | 5 | 34 | 2 | 5 | 5 | 5 | 4 |
| 5 | 5 | 3 | 33 | 3 | 4 | 4 | 4 | 2 |
| 5 | 5 | 5 | 57 | 1 | 5 | 5 | 5 | 5 |
| 5 | 5 | 5 | 44 | 3 | 4 | 4 | 4 | 3 |
| 5 | 5 | 5 | 57 | 1 | 5 | 5 | 5 | 5 |
| 5 | 5 | 5 | 47 | 1 | 5 | 5 | 5 | 4 |
| 5 | 5 | 5 | 50 | 1 | 5 | 5 | 5 | 5 |
| 3 | 3 | 5 | 45 | 1 | 5 | 5 | 5 | 1 |
| 5 | 5 | 4 | 57 | 2 | 4 | 5 | 4 | 4 |
| 5 | 5 | 4 | 57 | 2 | 4 | 4 | 4 | 3 |
| 5 | 5 | 3 | 61 | 2 | 4 | 4 | 3 | 3 |
| 5 | 5 | 5 | 54 | 3 | 3 | 3 | 3 | 3 |
| 5 | 5 | 1 | 61 | 1 | 5 | 5 | 5 | 4 |
| 5 | 5 | 5 | 61 | 1 | 5 | 5 | 5 | 2 |
| 5 | 5 | 5 | 34 | 1 | 5 | 5 | 5 | 5 |
| 5 | 5 | 5 | 58 | 2 | 5 | 1 | 5 | 4 |
| 5 | 5 | 5 | 43 | 1 | 4 | 5 | 4 | 3 |
| 5 | 5 | 5 | 58 | 1 | 5 | 5 | 4 | 3 |
| 2 | 2 | 4 | 53 | 1 | 5 | 5 | 4 | 4 |

|   |   |   |    |   |   |   |   |   |
|---|---|---|----|---|---|---|---|---|
| 5 | 5 | 5 | 59 | 3 | 5 | 5 | 5 | 3 |
| 3 | 5 | 5 | 31 | 1 | 5 | 5 | 3 | 1 |
| 5 | 5 | 5 | 31 | 1 | 5 | 5 | 4 | 4 |
| 5 | 5 | 3 | 61 | 2 | 4 | 4 | 3 | 3 |
| 5 | 5 | 5 | 51 | 3 | 5 | 4 | 2 | 3 |
| 5 | 5 | 5 | 45 | 5 | 5 | 5 | 5 | 5 |
| 5 | 5 | 5 | 61 | 4 | 4 | 4 | 4 | 4 |
| 5 | 5 | 5 | 32 | 1 | 5 | 5 | 5 | 2 |
| 4 | 4 | 4 | 61 | 2 | 4 | 4 | 4 | 3 |
| 4 | 4 | 5 | 41 | 2 | 4 | 4 | 4 | 2 |
| 5 | 5 | 5 | 61 | 2 | 4 | 3 | 3 | 3 |
| 5 | 5 | 5 | 59 | 2 | 5 | 5 | 3 | 3 |
| 5 | 5 | 5 | 59 | 1 | 1 | 1 | 1 | 1 |
| 5 | 3 | 3 | 39 | 1 | 1 | 5 | 3 | 4 |
| 5 | 5 | 5 | 46 | 3 | 3 | 4 | 4 | 1 |
| 5 | 5 | 3 | 53 | 1 | 5 | 5 | 5 | 5 |
| 5 | 5 | 5 | 59 | 2 | 2 | 5 | 5 | 5 |
| 3 | 3 | 3 | 61 | 1 | 4 | 4 | 4 | 3 |
| 5 | 5 | 4 | 57 | 2 | 4 | 4 | 3 | 2 |
| 5 | 5 | 5 | 61 | 1 | 5 | 5 | 3 | 4 |
| 5 | 5 | 3 | 39 | 3 | 4 | 4 | 3 | 3 |
| 5 | 5 | 5 | 34 | 3 | 4 | 4 | 3 | 2 |
| 5 | 5 | 5 | 49 | 1 | 5 | 5 | 4 | 4 |
| 5 | 5 | 5 | 61 | 1 | 5 | 5 | 5 | 3 |
| 3 | 3 | 3 | 34 | 3 | 4 | 5 | 3 | 2 |
| 3 | 3 | 3 | 49 | 3 | 4 | 4 | 2 | 2 |
| 5 | 5 | 5 | 42 | 3 | 4 | 4 | 3 | 2 |
| 5 | 5 | 5 | 31 | 1 | 5 | 5 | 5 | 5 |
| 5 | 3 | 4 | 43 | 1 | 5 | 4 | 5 | 3 |
| 5 | 3 | 3 | 34 | 1 | 5 | 5 | 4 | 4 |
| 3 | 3 | 3 | 49 | 2 | 2 | 4 | 3 | 4 |
| 3 | 5 | 1 | 55 | 5 | 1 | 3 | 1 | 1 |
| 3 | 1 | 2 | 54 | 1 | 4 | 3 | 2 | 2 |
| 5 | 5 | 5 | 54 | 1 | 5 | 5 | 5 | 5 |
| 5 | 4 | 3 | 44 | 1 | 5 | 4 | 3 | 4 |
| 5 | 5 | 5 | 61 | 2 | 4 | 3 | 4 | 3 |
| 5 | 5 | 5 | 34 | 1 | 3 | 4 | 3 | 4 |
| 5 | 5 | 5 | 50 | 1 | 5 | 5 | 3 | 2 |
| 4 | 4 | 4 | 54 | 2 | 4 | 4 | 4 | 2 |
| 5 | 5 | 5 | 57 | 2 | 4 | 5 | 5 | 5 |
| 5 | 5 | 1 | 60 | 1 | 4 | 4 | 4 | 4 |
| 5 | 5 | 4 | 47 | 1 | 5 | 3 | 3 | 2 |
| 5 | 3 | 5 | 61 | 3 | 5 | 5 | 4 | 3 |
| 5 | 5 | 5 | 48 | 1 | 5 | 5 | 5 | 1 |
| 5 | 5 | 5 | 54 | 3 | 5 | 5 | 3 | 5 |
| 5 | 5 | 5 | 32 | 2 | 5 | 5 | 3 | 3 |
| 4 | 4 | 4 | 40 | 3 | 4 | 4 | 3 | 2 |
| 5 | 5 | 4 | 40 | 2 | 4 | 4 | 4 | 2 |
| 5 | 5 | 5 | 59 | 1 | 5 | 5 | 4 | 5 |
| 4 | 2 | 4 | 40 | 3 | 3 | 4 | 4 | 3 |
| 4 | 2 | 4 | 54 | 1 | 1 | 5 | 4 | 3 |
| 5 | 5 | 5 | 53 | 5 | 5 | 5 | 5 | 3 |
| 3 | 3 | 3 | 60 | 3 | 3 | 3 | 3 | 3 |
| 4 | 4 | 4 | 50 | 2 | 5 | 5 | 4 | 4 |

|   |   |   |    |   |   |   |   |   |
|---|---|---|----|---|---|---|---|---|
| 4 | 5 | 4 | 45 | 1 | 5 | 5 | 5 | 4 |
| 5 | 5 | 5 | 35 | 1 | 4 | 5 | 5 | 3 |
| 3 | 1 | 4 | 54 | 3 | 5 | 4 | 2 | 2 |
| 3 | 3 | 3 | 41 | 3 | 4 | 4 | 3 | 3 |
| 5 | 5 | 5 | 61 | 3 | 3 | 3 | 3 | 3 |
| 4 | 5 | 5 | 30 | 5 | 5 | 5 | 4 | 5 |
| 2 | 4 | 2 | 38 | 1 | 5 | 5 | 5 | 4 |
| 5 | 5 | 5 | 45 | 1 | 5 | 5 | 4 | 3 |
| 2 | 4 | 3 | 43 | 3 | 2 | 2 | 3 | 1 |
| 5 | 2 | 3 | 43 | 3 | 3 | 3 | 1 | 1 |
| 5 | 4 | 3 | 55 | 1 | 5 | 5 | 4 | 3 |
| 5 | 5 | 5 | 58 | 1 | 5 | 5 | 4 | 3 |
| 5 | 5 | 5 | 61 | 2 | 4 | 4 | 4 | 1 |
| 5 | 5 | 4 | 43 | 2 | 5 | 5 | 4 | 3 |
| 5 | 5 | 4 | 59 | 1 | 5 | 5 | 4 | 4 |
| 5 | 5 | 5 | 61 | 1 | 5 | 5 | 5 | 5 |
| 5 | 5 | 4 | 36 | 2 | 4 | 3 | 3 | 3 |
| 5 | 5 | 3 | 56 | 3 | 5 | 5 | 4 | 4 |
| 5 | 5 | 5 | 56 | 1 | 4 | 4 | 4 | 4 |
| 3 | 4 | 3 | 55 | 2 | 4 | 4 | 3 | 2 |
| 5 | 5 | 3 | 41 | 3 | 4 | 4 | 4 | 4 |
| 5 | 5 | 4 | 65 | 1 | 5 | 5 | 4 | 2 |
| 5 | 3 | 5 | 31 | 3 | 5 | 5 | 5 | 3 |
| 3 | 3 | 3 | 57 | 3 | 5 | 4 | 3 | 3 |
| 5 | 5 | 5 | 43 | 1 | 5 | 5 | 5 | 5 |
| 5 | 5 | 1 | 51 | 5 | 1 | 5 | 1 | 1 |
| 4 | 5 | 5 | 60 | 1 | 4 | 4 | 4 | 4 |
| 4 | 3 | 4 | 59 | 3 | 4 | 4 | 2 | 4 |
| 5 | 5 | 3 | 54 | 5 | 5 | 5 | 5 | 1 |
| 5 | 5 | 5 | 42 | 1 | 5 | 5 | 5 | 3 |
| 5 | 5 | 5 | 46 | 1 | 5 | 5 | 5 | 5 |
| 5 | 5 | 5 | 42 | 2 | 4 | 4 | 4 | 3 |
| 3 | 3 | 3 | 46 | 1 | 5 | 5 | 4 | 2 |
| 5 | 5 | 4 | 61 | 2 | 5 | 5 | 5 | 5 |
| 3 | 3 | 3 | 48 | 2 | 4 | 4 | 4 | 3 |
| 3 | 3 | 3 | 49 | 3 | 4 | 4 | 4 | 2 |
| 5 | 5 | 5 | 41 | 1 | 5 | 5 | 5 | 5 |
| 4 | 4 | 4 | 41 | 2 | 5 | 5 | 4 | 3 |
| 5 | 5 | 3 | 41 | 1 | 4 | 4 | 3 | 3 |
| 3 | 4 | 4 | 49 | 2 | 4 | 4 | 4 | 4 |
| 3 | 3 | 3 | 56 | 2 | 4 | 4 | 4 | 4 |
| 3 | 3 | 3 | 46 | 3 | 4 | 4 | 3 | 3 |
| 5 | 4 | 5 | 41 | 2 | 4 | 5 | 4 | 3 |
| 5 | 5 | 5 | 57 | 2 | 5 | 5 | 4 | 3 |
| 4 | 4 | 4 | 59 | 2 | 4 | 4 | 3 | 3 |
| 3 | 3 | 3 | 49 | 3 | 4 | 3 | 2 | 2 |
| 5 | 5 | 5 | 45 | 2 | 4 | 4 | 4 | 4 |
| 5 | 5 | 4 | 37 | 1 | 4 | 4 | 4 | 4 |
| 5 | 5 | 4 | 44 | 1 | 5 | 5 | 4 | 3 |
| 4 | 4 | 2 | 51 | 2 | 5 | 4 | 3 | 3 |
| 4 | 5 | 3 | 34 | 2 | 4 | 4 | 1 | 3 |
| 4 | 3 | 3 | 50 | 1 | 5 | 5 | 4 | 4 |
| 4 | 5 | 5 | 53 | 2 | 5 | 5 | 4 | 4 |
| 4 | 3 | 3 | 36 | 3 | 3 | 3 | 1 | 1 |

|   |   |   |    |   |   |   |   |   |
|---|---|---|----|---|---|---|---|---|
| 5 | 5 | 3 | 44 | 1 | 5 | 5 | 4 | 4 |
| 5 | 4 | 4 | 34 | 2 | 4 | 4 | 5 | 4 |
| 3 | 4 | 2 | 41 | 2 | 5 | 5 | 5 | 4 |
| 5 | 5 | 5 | 54 | 2 | 4 | 5 | 4 | 3 |
| 5 | 5 | 5 | 46 | 1 | 5 | 4 | 4 | 3 |
| 3 | 3 | 3 | 38 | 2 | 4 | 4 | 2 | 4 |
| 5 | 5 | 5 | 34 | 2 | 5 | 5 | 5 | 4 |
| 3 | 5 | 2 | 49 | 2 | 4 | 4 | 4 | 4 |
| 4 | 4 | 3 | 44 | 2 | 4 | 4 | 2 | 4 |
| 5 | 5 | 5 | 61 | 4 | 4 | 4 | 3 | 3 |
| 5 | 5 | 3 | 59 | 2 | 4 | 4 | 3 | 2 |
| 3 | 4 | 4 | 57 | 2 | 4 | 4 | 4 | 4 |
| 5 | 5 | 5 | 34 | 4 | 4 | 4 | 4 | 4 |
| 5 | 5 | 5 | 34 | 2 | 4 | 4 | 3 | 3 |
| 5 | 4 | 3 | 41 | 2 | 4 | 4 | 4 | 3 |
| 5 | 5 | 5 | 50 | 4 | 4 | 4 | 4 | 4 |
| 5 | 5 | 5 | 39 | 1 | 4 | 4 | 4 | 1 |
| 3 | 4 | 3 | 58 | 1 | 5 | 5 | 4 | 3 |
| 4 | 4 | 4 | 39 | 2 | 4 | 4 | 4 | 3 |
| 3 | 3 | 3 | 44 | 2 | 4 | 4 | 4 | 3 |
| 5 | 5 | 4 | 47 | 2 | 4 | 4 | 4 | 4 |
| 3 | 3 | 3 | 47 | 1 | 4 | 4 | 3 | 4 |
| 3 | 5 | 3 | 52 | 1 | 5 | 5 | 4 | 4 |
| 5 | 5 | 5 | 44 | 1 | 5 | 5 | 3 | 3 |
| 3 | 5 | 3 | 49 | 2 | 4 | 4 | 2 | 4 |
| 5 | 5 | 5 | 41 | 1 | 4 | 5 | 5 | 2 |
| 3 | 3 | 3 | 48 | 1 | 4 | 4 | 3 | 4 |
| 4 | 4 | 3 | 44 | 2 | 4 | 4 | 2 | 2 |
| 5 | 5 | 5 | 35 | 1 | 5 | 5 | 4 | 4 |
| 3 | 3 | 3 | 37 | 3 | 4 | 4 | 2 | 3 |
| 4 | 4 | 3 | 55 | 2 | 5 | 5 | 3 | 3 |
| 3 | 5 | 5 | 33 | 2 | 4 | 4 | 4 | 3 |
| 3 | 3 | 3 | 28 | 2 | 4 | 5 | 4 | 4 |
| 4 | 4 | 4 | 40 | 3 | 3 | 4 | 2 | 3 |
| 5 | 4 | 4 | 53 | 2 | 4 | 4 | 4 | 4 |
| 4 | 3 | 2 | 44 | 2 | 4 | 4 | 2 | 3 |
| 2 | 3 | 1 | 44 | 3 | 5 | 4 | 2 | 3 |
| 3 | 3 | 3 | 44 | 2 | 4 | 5 | 3 | 3 |
| 5 | 5 | 3 | 44 | 4 | 4 | 5 | 4 | 4 |
| 5 | 5 | 5 | 31 | 2 | 5 | 5 | 5 | 2 |
| 3 | 3 | 3 | 42 | 2 | 5 | 4 | 3 | 3 |
| 3 | 3 | 5 | 58 | 3 | 3 | 5 | 4 | 4 |
| 3 | 3 | 3 | 44 | 3 | 4 | 3 | 2 | 2 |
| 2 | 2 | 2 | 41 | 3 | 4 | 4 | 2 | 3 |
| 5 | 3 | 3 | 63 | 3 | 4 | 4 | 3 | 3 |
| 5 | 5 | 5 | 52 | 3 | 4 | 4 | 4 | 3 |
| 3 | 3 | 3 | 53 | 1 | 4 | 4 | 2 | 4 |
| 4 | 3 | 3 | 41 | 1 | 4 | 4 | 4 | 4 |
| 5 | 5 | 5 | 32 | 1 | 5 | 5 | 5 | 4 |
| 4 | 4 | 4 | 55 | 2 | 4 | 4 | 4 | 4 |
| 5 | 5 | 5 | 40 | 1 | 5 | 5 | 5 | 4 |
| 3 | 3 | 3 | 62 | 3 | 4 | 4 | 4 | 4 |
| 2 | 3 | 2 | 41 | 3 | 3 | 4 | 5 | 4 |
| 5 | 4 | 4 | 37 | 1 | 5 | 5 | 4 | 4 |



|   |   |   |    |   |   |   |   |   |
|---|---|---|----|---|---|---|---|---|
| 4 | 4 | 3 | 42 | 2 | 4 | 4 | 4 | 3 |
| 5 | 5 | 5 | 61 | 1 | 5 | 5 | 5 | 5 |
| 3 | 4 | 4 | 41 | 2 | 4 | 4 | 2 | 2 |
| 3 | 3 | 3 | 47 | 3 | 3 | 3 | 3 | 3 |
| 4 | 4 | 2 | 58 | 2 | 4 | 4 | 2 | 2 |
| 5 | 5 | 5 | 43 | 1 | 5 | 5 | 5 | 5 |
| 3 | 3 | 3 | 42 | 2 | 4 | 4 | 3 | 4 |
| 4 | 5 | 2 | 45 | 1 | 4 | 4 | 4 | 4 |
| 5 | 5 | 5 | 50 | 2 | 4 | 4 | 4 | 2 |
| 5 | 5 | 5 | 47 | 3 | 2 | 4 | 2 | 1 |
| 4 | 4 | 3 | 41 | 2 | 4 | 4 | 4 | 3 |
| 4 | 4 | 4 | 39 | 1 | 5 | 4 | 3 | 2 |
| 3 | 4 | 3 | 49 | 2 | 4 | 4 | 4 | 3 |
| 4 | 5 | 5 | 46 | 2 | 4 | 4 | 3 | 3 |
| 3 | 3 | 3 | 61 | 1 | 5 | 5 | 3 | 3 |
| 3 | 3 | 3 | 34 | 1 | 4 | 4 | 3 | 3 |
| 5 | 5 | 3 | 48 | 1 | 4 | 4 | 3 | 3 |
| 5 | 4 | 5 | 61 | 3 | 4 | 3 | 2 | 4 |
| 5 | 5 | 5 | 45 | 1 | 5 | 5 | 5 | 5 |
| 5 | 5 | 5 | 57 | 1 | 5 | 5 | 5 | 5 |
| 5 | 4 | 3 | 41 | 5 | 4 | 5 | 4 | 2 |
| 5 | 5 | 5 | 42 | 2 | 5 | 5 | 5 | 5 |
| 4 | 4 | 4 | 55 | 4 | 4 | 5 | 4 | 3 |
| 5 | 5 | 5 | 39 | 2 | 5 | 5 | 5 | 3 |
| 2 | 2 | 2 | 52 | 3 | 3 | 3 | 1 | 1 |
| 3 | 3 | 3 | 32 | 3 | 4 | 4 | 2 | 3 |
| 5 | 5 | 5 | 53 | 1 | 5 | 5 | 5 | 5 |
| 3 | 3 | 2 | 41 | 1 | 5 | 5 | 3 | 3 |
| 5 | 5 | 5 | 51 | 1 | 4 | 4 | 4 | 3 |
| 5 | 5 | 5 | 40 | 1 | 4 | 4 | 2 | 3 |
| 4 | 5 | 4 | 40 | 1 | 5 | 5 | 4 | 3 |
| 3 | 3 | 3 | 44 | 3 | 5 | 5 | 3 | 3 |
| 5 | 5 | 4 | 35 | 1 | 5 | 5 | 5 | 5 |
| 4 | 5 | 1 | 43 | 3 | 1 | 1 | 1 | 1 |
| 4 | 4 | 4 | 45 | 2 | 4 | 3 | 2 | 3 |
| 5 | 5 | 5 | 48 | 3 | 2 | 4 | 3 | 2 |
| 5 | 5 | 5 | 59 | 2 | 2 | 5 | 2 | 2 |
| 3 | 3 | 3 | 26 | 2 | 4 | 4 | 3 | 4 |
| 3 | 3 | 3 | 36 | 1 | 5 | 5 | 5 | 5 |
| 5 | 5 | 2 | 59 | 3 | 5 | 5 | 2 | 2 |
| 5 | 5 | 3 | 52 | 1 | 5 | 5 | 4 | 3 |
| 2 | 2 | 2 | 55 | 2 | 4 | 4 | 4 | 3 |
| 4 | 4 | 3 | 41 | 3 | 4 | 3 | 2 | 2 |
| 5 | 5 | 5 | 39 | 2 | 5 | 5 | 2 | 2 |
| 4 | 4 | 4 | 35 | 4 | 4 | 4 | 4 | 4 |
| 5 | 5 | 4 | 61 | 1 | 5 | 5 | 4 | 4 |
| 3 | 3 | 3 | 47 | 1 | 4 | 4 | 4 | 2 |
| 3 | 3 | 5 | 39 | 2 | 3 | 3 | 2 | 1 |
| 5 | 5 | 5 | 41 | 1 | 5 | 5 | 4 | 4 |
| 5 | 5 | 5 | 48 | 2 | 4 | 4 | 4 | 4 |
| 3 | 3 | 3 | 34 | 1 | 5 | 5 | 3 | 3 |
| 3 | 3 | 3 | 53 | 3 | 4 | 4 | 3 | 4 |
| 1 | 3 | 4 | 43 | 3 | 4 | 4 | 2 | 4 |
| 5 | 5 | 3 | 42 | 2 | 4 | 4 | 4 | 4 |

|   |   |   |    |   |   |   |   |   |
|---|---|---|----|---|---|---|---|---|
| 5 | 3 | 2 | 27 | 1 | 5 | 5 | 2 | 4 |
| 5 | 5 | 3 | 39 | 3 | 4 | 4 | 3 | 3 |
| 4 | 4 | 4 | 49 | 2 | 5 | 4 | 3 | 4 |
| 4 | 3 | 3 | 39 | 2 | 4 | 4 | 3 | 4 |
| 3 | 3 | 1 | 54 | 3 | 2 | 1 | 1 | 3 |
| 3 | 3 | 3 | 33 | 1 | 5 | 5 | 3 | 4 |
| 4 | 4 | 4 | 63 | 1 | 5 | 5 | 4 | 4 |
| 3 | 3 | 3 | 61 | 3 | 4 | 4 | 3 | 3 |
| 4 | 4 | 3 | 50 | 1 | 5 | 5 | 4 | 2 |
| 5 | 5 | 5 | 39 | 2 | 5 | 5 | 5 | 5 |
| 5 | 5 | 5 | 42 | 2 | 5 | 5 | 5 | 5 |
| 5 | 5 | 5 | 61 | 1 | 5 | 5 | 5 | 5 |
| 4 | 4 | 4 | 45 | 1 | 5 | 5 | 4 | 4 |
| 4 | 4 | 3 | 40 | 3 | 4 | 4 | 2 | 3 |
| 3 | 3 | 3 | 38 | 2 | 4 | 4 | 4 | 2 |
| 5 | 5 | 5 | 61 | 2 | 5 | 5 | 5 | 3 |
| 5 | 5 | 5 | 43 | 1 | 4 | 4 | 4 | 4 |
| 3 | 3 | 3 | 51 | 4 | 3 | 3 | 4 | 2 |
| 4 | 3 | 2 | 57 | 2 | 4 | 4 | 3 | 4 |
| 5 | 5 | 5 | 38 | 1 | 5 | 3 | 4 | 4 |
| 4 | 4 | 3 | 32 | 2 | 4 | 4 | 3 | 4 |
| 4 | 4 | 4 | 29 | 2 | 4 | 4 | 4 | 2 |
| 5 | 5 | 5 | 62 | 2 | 3 | 4 | 3 | 2 |
| 3 | 3 | 2 | 48 | 1 | 4 | 4 | 3 | 3 |
| 5 | 4 | 2 | 34 | 2 | 4 | 4 | 2 | 4 |
| 5 | 3 | 2 | 33 | 2 | 5 | 5 | 1 | 1 |
| 5 | 5 | 5 | 50 | 1 | 5 | 5 | 5 | 4 |
| 5 | 5 | 4 | 57 | 2 | 4 | 4 | 3 | 2 |
| 5 | 5 | 5 | 41 | 5 | 5 | 5 | 5 | 5 |
| 3 | 3 | 2 | 47 | 4 | 2 | 4 | 2 | 2 |
| 4 | 4 | 4 | 57 | 3 | 4 | 4 | 3 | 3 |
| 5 | 5 | 5 | 45 | 1 | 5 | 5 | 5 | 5 |
| 3 | 3 | 3 | 61 | 2 | 4 | 4 | 3 | 3 |
| 5 | 4 | 4 | 39 | 2 | 4 | 4 | 4 | 3 |
| 5 | 5 | 5 | 39 | 1 | 5 | 5 | 5 | 5 |
| 5 | 4 | 2 | 57 | 3 | 3 | 5 | 3 | 3 |
| 5 | 5 | 5 | 46 | 1 | 5 | 5 | 5 | 4 |
| 3 | 3 | 3 | 43 | 2 | 4 | 4 | 3 | 3 |
| 3 | 3 | 3 | 52 | 4 | 4 | 4 | 2 | 2 |
| 5 | 5 | 5 | 48 | 1 | 4 | 4 | 4 | 4 |
| 4 | 4 | 4 | 61 | 3 | 4 | 3 | 2 | 2 |
| 5 | 5 | 3 | 57 | 2 | 5 | 5 | 2 | 2 |
| 5 | 5 | 5 | 46 | 2 | 3 | 3 | 2 | 3 |
| 5 | 3 | 3 | 50 | 2 | 4 | 4 | 4 | 3 |
| 5 | 5 | 5 | 24 | 1 | 5 | 5 | 5 | 3 |
| 5 | 5 | 3 | 43 | 1 | 5 | 5 | 4 | 3 |
| 3 | 5 | 2 | 39 | 1 | 5 | 5 | 5 | 1 |
| 4 | 4 | 4 | 46 | 2 | 4 | 4 | 4 | 4 |
| 1 | 3 | 1 | 47 | 3 | 3 | 3 | 2 | 2 |
| 4 | 4 | 3 | 42 | 3 | 4 | 4 | 3 | 3 |
| 3 | 3 | 3 | 54 | 2 | 4 | 4 | 4 | 4 |
| 5 | 5 | 5 | 64 | 3 | 3 | 3 | 3 | 3 |
| 3 | 4 | 4 | 47 | 3 | 4 | 4 | 3 | 2 |
| 5 | 3 | 2 | 38 | 3 | 4 | 4 | 2 | 4 |

|   |   |   |    |   |   |   |   |   |
|---|---|---|----|---|---|---|---|---|
| 4 | 4 | 4 | 58 | 2 | 4 | 3 | 4 | 4 |
| 5 | 5 | 5 | 59 | 4 | 5 | 4 | 4 | 4 |
| 4 | 4 | 4 | 23 | 2 | 4 | 4 | 2 | 2 |
| 2 | 4 | 2 | 43 | 3 | 2 | 4 | 2 | 4 |
| 5 | 5 | 4 | 36 | 2 | 4 | 4 | 4 | 3 |
| 5 | 5 | 4 | 40 | 2 | 5 | 5 | 5 | 3 |
| 4 | 1 | 1 | 41 | 3 | 1 | 4 | 1 | 1 |
| 5 | 5 | 3 | 49 | 2 | 4 | 4 | 1 | 2 |
| 3 | 3 | 3 | 54 | 3 | 4 | 4 | 2 | 1 |
| 3 | 3 | 3 | 49 | 3 | 3 | 3 | 3 | 3 |
| 2 | 4 | 3 | 54 | 4 | 4 | 5 | 3 | 3 |
| 5 | 5 | 4 | 40 | 2 | 5 | 5 | 4 | 4 |
| 5 | 5 | 5 | 30 | 3 | 4 | 3 | 2 | 2 |
| 4 | 5 | 5 | 36 | 2 | 5 | 5 | 3 | 4 |
| 3 | 3 | 3 | 61 | 2 | 5 | 5 | 3 | 2 |
| 3 | 3 | 3 | 44 | 1 | 5 | 5 | 4 | 2 |
| 2 | 2 | 2 | 42 | 2 | 4 | 4 | 2 | 3 |
| 2 | 2 | 2 | 36 | 2 | 4 | 4 | 3 | 3 |
| 5 | 5 | 5 | 41 | 1 | 5 | 5 | 4 | 4 |
| 5 | 3 | 3 | 52 | 1 | 5 | 5 | 3 | 3 |
| 3 | 3 | 3 | 59 | 3 | 3 | 4 | 2 | 3 |
| 3 | 3 | 3 | 45 | 3 | 4 | 4 | 4 | 3 |
| 3 | 3 | 3 | 57 | 4 | 4 | 3 | 3 | 2 |
| 4 | 4 | 4 | 41 | 2 | 4 | 4 | 4 | 4 |
| 5 | 5 | 5 | 42 | 1 | 5 | 5 | 5 | 4 |
| 5 | 5 | 3 | 48 | 1 | 5 | 3 | 3 | 1 |
| 5 | 5 | 3 | 13 | 2 | 5 | 5 | 4 | 4 |
| 3 | 3 | 3 | 44 | 2 | 4 | 4 | 4 | 4 |
| 5 | 3 | 3 | 65 | 1 | 4 | 3 | 3 | 3 |
| 4 | 4 | 3 | 43 | 2 | 4 | 3 | 3 | 4 |
| 1 | 1 | 1 | 46 | 1 | 1 | 1 | 1 | 5 |
| 3 | 5 | 5 | 34 | 1 | 5 | 5 | 5 | 5 |
| 5 | 5 | 5 | 32 | 2 | 4 | 3 | 3 | 3 |
| 4 | 4 | 4 | 62 | 4 | 4 | 4 | 4 | 4 |
| 3 | 3 | 4 | 43 | 2 | 4 | 4 | 4 | 4 |
| 5 | 5 | 5 | 63 | 2 | 1 | 1 | 1 | 1 |
| 5 | 5 | 5 | 45 | 1 | 4 | 5 | 5 | 5 |
| 5 | 5 | 5 | 53 | 1 | 5 | 5 | 5 | 5 |
| 5 | 5 | 5 | 42 | 1 | 5 | 4 | 4 | 3 |
| 5 | 5 | 5 | 48 | 1 | 5 | 5 | 5 | 5 |
| 4 | 4 | 4 | 53 | 5 | 5 | 5 | 5 | 5 |
| 4 | 4 | 4 | 40 | 2 | 4 | 4 | 3 | 3 |
| 5 | 5 | 5 | 47 | 1 | 4 | 4 | 4 | 4 |
| 4 | 4 | 4 | 46 | 2 | 4 | 4 | 4 | 4 |
| 4 | 4 | 4 | 46 | 3 | 4 | 4 | 4 | 4 |
| 3 | 4 | 2 | 32 | 3 | 4 | 4 | 3 | 2 |
| 4 | 4 | 3 | 49 | 3 | 4 | 4 | 4 | 4 |
| 3 | 4 | 4 | 57 | 1 | 5 | 4 | 3 | 2 |
| 4 | 2 | 3 | 61 | 2 | 5 | 4 | 4 | 4 |
| 5 | 5 | 5 | 43 | 1 | 5 | 5 | 5 | 3 |
| 4 | 4 | 4 | 65 | 2 | 4 | 4 | 4 | 4 |
| 3 | 5 | 3 | 43 | 3 | 4 | 4 | 4 | 3 |
| 5 | 5 | 5 | 48 | 1 | 5 | 5 | 5 | 5 |
| 3 | 3 | 3 | 41 | 1 | 4 | 4 | 4 | 3 |

|   |   |   |    |   |   |   |   |   |
|---|---|---|----|---|---|---|---|---|
| 5 | 5 | 5 | 46 | 5 | 5 | 5 | 5 | 5 |
| 5 | 5 | 5 | 61 | 1 | 5 | 5 | 5 | 5 |
| 3 | 3 | 3 | 61 | 1 | 5 | 5 | 5 | 5 |
| 3 | 4 | 3 | 58 | 2 | 4 | 5 | 4 | 3 |
| 4 | 3 | 4 | 47 | 1 | 3 | 3 | 5 | 4 |
| 5 | 5 | 4 | 61 | 1 | 5 | 5 | 5 | 4 |
| 5 | 5 | 5 | 54 | 3 | 4 | 5 | 3 | 5 |
| 5 | 5 | 5 | 42 | 1 | 5 | 5 | 4 | 3 |
| 4 | 3 | 3 | 57 | 1 | 4 | 5 | 3 | 3 |
| 5 | 5 | 5 | 50 | 1 | 5 | 5 | 5 | 4 |
| 5 | 5 | 3 | 50 | 1 | 4 | 5 | 5 | 4 |
| 3 | 3 | 3 | 24 | 2 | 2 | 2 | 1 | 4 |
| 5 | 5 | 5 | 42 | 2 | 4 | 4 | 4 | 4 |
| 4 | 4 | 4 | 48 | 2 | 4 | 4 | 4 | 4 |
| 4 | 4 | 4 | 44 | 2 | 4 | 4 | 4 | 4 |
| 2 | 2 | 3 | 60 | 2 | 3 | 4 | 2 | 2 |
| 3 | 3 | 3 | 61 | 2 | 4 | 4 | 2 | 4 |
| 5 | 5 | 5 | 43 | 1 | 4 | 5 | 4 | 4 |
| 5 | 5 | 4 | 43 | 2 | 4 | 4 | 3 | 4 |
| 5 | 5 | 5 | 43 | 2 | 5 | 5 | 3 | 5 |
| 5 | 5 | 5 | 61 | 1 | 5 | 5 | 5 | 5 |
| 3 | 3 | 3 | 40 | 3 | 4 | 4 | 2 | 1 |
| 3 | 3 | 3 | 47 | 4 | 4 | 4 | 4 | 3 |
| 4 | 4 | 3 | 45 | 1 | 4 | 5 | 4 | 3 |
| 5 | 5 | 5 | 39 | 1 | 5 | 4 | 4 | 4 |
| 5 | 5 | 3 | 36 | 3 | 3 | 3 | 2 | 1 |
| 4 | 4 | 4 | 42 | 2 | 4 | 4 | 3 | 2 |
| 5 | 5 | 3 | 49 | 1 | 5 | 5 | 3 | 4 |
| 3 | 3 | 3 | 65 | 1 | 5 | 5 | 4 | 4 |
| 3 | 3 | 3 | 62 | 4 | 3 | 1 | 1 | 1 |
| 4 | 4 | 3 | 57 | 2 | 4 | 4 | 4 | 4 |
| 4 | 5 | 5 | 50 | 2 | 4 | 4 | 3 | 3 |
| 5 | 5 | 5 | 61 | 1 | 5 | 5 | 5 | 5 |
| 5 | 5 | 5 | 29 | 1 | 5 | 5 | 5 | 4 |
| 5 | 5 | 5 | 57 | 4 | 4 | 5 | 1 | 4 |
| 4 | 4 | 4 | 56 | 1 | 5 | 5 | 5 | 5 |
| 5 | 5 | 5 | 65 | 1 | 5 | 5 | 5 | 5 |
| 2 | 2 | 2 | 25 | 1 | 4 | 3 | 4 | 4 |
| 5 | 5 | 5 | 57 | 1 | 3 | 5 | 5 | 3 |
| 5 | 5 | 3 | 51 | 4 | 4 | 4 | 4 | 4 |
| 5 | 5 | 5 | 61 | 5 | 5 | 3 | 5 | 5 |
| 1 | 1 | 1 | 37 | 1 | 5 | 5 | 5 | 5 |
| 5 | 4 | 4 | 27 | 3 | 5 | 5 | 5 | 3 |
| 5 | 5 | 3 | 43 | 2 | 4 | 4 | 4 | 4 |
| 5 | 5 | 5 | 41 | 1 | 5 | 4 | 4 | 3 |
| 1 | 4 | 4 | 58 | 1 | 4 | 3 | 3 | 1 |
| 5 | 3 | 1 | 41 | 1 | 5 | 5 | 1 | 3 |
| 3 | 3 | 3 | 43 | 1 | 5 | 5 | 5 | 3 |
| 3 | 3 | 3 | 65 | 2 | 4 | 4 | 4 | 3 |
| 5 | 5 | 4 | 56 | 1 | 3 | 4 | 3 | 2 |
| 3 | 3 | 3 | 61 | 3 | 3 | 3 | 3 | 3 |
| 3 | 3 | 3 | 65 | 2 | 4 | 4 | 3 | 4 |
| 5 | 5 | 5 | 38 | 2 | 5 | 4 | 4 | 4 |
| 5 | 5 | 5 | 47 | 1 | 4 | 5 | 4 | 3 |

|   |   |   |    |   |   |   |   |   |
|---|---|---|----|---|---|---|---|---|
| 5 | 5 | 5 | 56 | 1 | 5 | 5 | 5 | 5 |
| 5 | 5 | 5 | 60 | 1 | 5 | 5 | 5 | 3 |
| 3 | 3 | 3 | 36 | 3 | 4 | 4 | 4 | 1 |
| 4 | 5 | 4 | 54 | 1 | 4 | 4 | 4 | 4 |
| 5 | 5 | 4 | 65 | 3 | 4 | 4 | 3 | 3 |
| 4 | 5 | 5 | 59 | 1 | 4 | 4 | 4 | 5 |
| 3 | 1 | 2 | 61 | 2 | 1 | 1 | 3 | 2 |
| 4 | 5 | 5 | 54 | 2 | 5 | 5 | 4 | 3 |
| 5 | 5 | 5 | 61 | 5 | 5 | 5 | 4 | 5 |
| 5 | 5 | 3 | 61 | 1 | 1 | 5 | 4 | 3 |
| 5 | 5 | 5 | 65 | 1 | 4 | 4 | 4 | 3 |
| 4 | 5 | 5 | 50 | 2 | 5 | 3 | 2 | 3 |
| 5 | 5 | 5 | 47 | 1 | 5 | 5 | 5 | 3 |
| 5 | 5 | 5 | 41 | 1 | 5 | 3 | 3 | 3 |
| 5 | 5 | 5 | 61 | 2 | 3 | 4 | 4 | 2 |
| 5 | 5 | 5 | 61 | 1 | 4 | 4 | 3 | 1 |
| 5 | 5 | 3 | 31 | 1 | 3 | 5 | 3 | 3 |
| 5 | 5 | 1 | 61 | 1 | 1 | 1 | 1 | 1 |
| 5 | 5 | 5 | 61 | 2 | 2 | 2 | 2 | 2 |
| 5 | 5 | 5 | 48 | 2 | 4 | 3 | 4 | 3 |
| 5 | 3 | 2 | 50 | 2 | 4 | 4 | 4 | 3 |
| 5 | 5 | 5 | 65 | 1 | 5 | 4 | 4 | 4 |
| 5 | 5 | 5 | 58 | 1 | 5 | 5 | 5 | 3 |
| 4 | 3 | 4 | 53 | 1 | 5 | 5 | 4 | 4 |
| 3 | 3 | 3 | 47 | 3 | 3 | 4 | 2 | 3 |
| 5 | 5 | 5 | 61 | 5 | 5 | 5 | 5 | 3 |
| 4 | 5 | 5 | 41 | 5 | 5 | 5 | 3 | 4 |
| 5 | 5 | 5 | 61 | 3 | 3 | 4 | 4 | 3 |
| 5 | 5 | 3 | 61 | 1 | 5 | 5 | 3 | 3 |
| 5 | 5 | 5 | 60 | 2 | 4 | 4 | 4 | 3 |
| 3 | 2 | 5 | 31 | 3 | 4 | 3 | 3 | 3 |
| 5 | 5 | 5 | 40 | 1 | 5 | 5 | 5 | 4 |
| 5 | 5 | 5 | 46 | 2 | 4 | 5 | 4 | 4 |
| 5 | 5 | 5 | 61 | 1 | 5 | 5 | 4 | 3 |
| 4 | 5 | 2 | 48 | 2 | 3 | 4 | 1 | 1 |
| 5 | 4 | 3 | 58 | 3 | 4 | 4 | 3 | 2 |
| 3 | 4 | 3 | 49 | 1 | 5 | 5 | 3 | 1 |
| 5 | 5 | 5 | 57 | 5 | 5 | 5 | 5 | 5 |
| 5 | 5 | 4 | 61 | 4 | 5 | 4 | 4 | 2 |
| 5 | 5 | 4 | 59 | 1 | 5 | 5 | 5 | 3 |
| 4 | 3 | 4 | 47 | 2 | 4 | 4 | 4 | 4 |
| 5 | 5 | 5 | 55 | 5 | 5 | 5 | 5 | 1 |
| 5 | 5 | 5 | 61 | 2 | 5 | 5 | 3 | 5 |
| 5 | 5 | 4 | 50 | 1 | 5 | 5 | 5 | 3 |
| 4 | 4 | 4 | 53 | 3 | 4 | 4 | 4 | 3 |
| 5 | 5 | 3 | 35 | 3 | 4 | 5 | 4 | 2 |
| 5 | 5 | 5 | 58 | 1 | 5 | 5 | 4 | 3 |
| 5 | 5 | 4 | 55 | 1 | 5 | 5 | 4 | 3 |
| 2 | 3 | 2 | 55 | 3 | 3 | 4 | 2 | 4 |
| 5 | 5 | 5 | 65 | 1 | 5 | 5 | 5 | 5 |
| 5 | 5 | 5 | 53 | 3 | 3 | 3 | 3 | 3 |
| 5 | 5 | 3 | 48 | 1 | 5 | 5 | 4 | 3 |
| 5 | 5 | 5 | 61 | 1 | 5 | 5 | 5 | 5 |
| 5 | 5 | 5 | 61 | 2 | 5 | 3 | 3 | 2 |

|   |   |   |    |   |   |   |   |   |
|---|---|---|----|---|---|---|---|---|
| 4 | 4 | 4 | 49 | 3 | 3 | 3 | 3 | 3 |
| 5 | 5 | 5 | 61 | 1 | 4 | 5 | 4 | 3 |
| 5 | 5 | 5 | 61 | 2 | 4 | 4 | 5 | 4 |
| 3 | 5 | 5 | 53 | 3 | 3 | 3 | 3 | 3 |
| 5 | 5 | 5 | 26 | 5 | 5 | 3 | 5 | 3 |
| 5 | 5 | 5 | 59 | 1 | 5 | 5 | 5 | 2 |
| 3 | 3 | 3 | 57 | 3 | 4 | 4 | 2 | 1 |
| 1 | 2 | 5 | 61 | 2 | 4 | 4 | 2 | 1 |
| 5 | 5 | 5 | 51 | 2 | 5 | 5 | 5 | 5 |
| 5 | 5 | 5 | 61 | 5 | 5 | 5 | 5 | 4 |
| 5 | 5 | 5 | 57 | 1 | 5 | 5 | 5 | 5 |
| 1 | 4 | 4 | 43 | 1 | 4 | 3 | 4 | 3 |
| 5 | 5 | 5 | 59 | 1 | 5 | 5 | 5 | 5 |
| 5 | 5 | 5 | 43 | 5 | 1 | 1 | 1 | 1 |
| 4 | 4 | 3 | 65 | 1 | 5 | 5 | 3 | 4 |
| 5 | 5 | 3 | 59 | 3 | 4 | 5 | 5 | 2 |
| 4 | 4 | 3 | 45 | 1 | 4 | 4 | 3 | 5 |
| 5 | 5 | 5 | 51 | 1 | 5 | 5 | 4 | 5 |
| 5 | 5 | 5 | 53 | 1 | 5 | 5 | 5 | 4 |
| 4 | 4 | 4 | 61 | 3 | 4 | 4 | 4 | 4 |
| 5 | 4 | 5 | 57 | 1 | 5 | 5 | 5 | 3 |
| 4 | 4 | 4 | 26 | 3 | 3 | 3 | 3 | 3 |
| 5 | 5 | 5 | 42 | 1 | 5 | 5 | 5 | 2 |
| 5 | 5 | 5 | 39 | 1 | 5 | 5 | 5 | 5 |
| 2 | 2 | 2 | 35 | 2 | 2 | 2 | 2 | 2 |
| 3 | 3 | 3 | 39 | 2 | 4 | 4 | 4 | 4 |
| 3 | 4 | 4 | 55 | 2 | 1 | 4 | 5 | 4 |
| 3 | 3 | 2 | 37 | 3 | 4 | 3 | 3 | 2 |
| 3 | 3 | 2 | 47 | 2 | 4 | 4 | 4 | 4 |
| 3 | 4 | 2 | 54 | 2 | 4 | 4 | 3 | 4 |
| 5 | 5 | 3 | 61 | 2 | 4 | 4 | 3 | 2 |
| 4 | 5 | 5 | 42 | 2 | 3 | 3 | 4 | 3 |
| 5 | 5 | 5 | 57 | 1 | 4 | 5 | 4 | 4 |
| 5 | 3 | 3 | 44 | 3 | 3 | 4 | 3 | 2 |
| 5 | 5 | 5 | 38 | 3 | 4 | 3 | 3 | 3 |
| 4 | 4 | 3 | 45 | 1 | 4 | 4 | 4 | 4 |
| 5 | 5 | 3 | 39 | 3 | 4 | 4 | 3 | 3 |
| 3 | 4 | 2 | 60 | 2 | 5 | 4 | 4 | 1 |
| 4 | 3 | 4 | 44 | 2 | 4 | 4 | 4 | 4 |
| 4 | 4 | 4 | 52 | 2 | 5 | 4 | 4 | 4 |
| 5 | 5 | 4 | 49 | 2 | 4 | 4 | 2 | 3 |
| 5 | 5 | 5 | 61 | 2 | 5 | 5 | 5 | 5 |
| 5 | 5 | 5 | 59 | 2 | 4 | 5 | 4 | 4 |
| 4 | 2 | 2 | 34 | 3 | 3 | 4 | 2 | 2 |
| 3 | 3 | 3 | 38 | 3 | 3 | 3 | 2 | 2 |
| 5 | 5 | 5 | 61 | 1 | 5 | 5 | 5 | 5 |
| 5 | 4 | 3 | 46 | 3 | 4 | 4 | 3 | 3 |
| 5 | 5 | 5 | 60 | 2 | 4 | 4 | 4 | 4 |
| 3 | 4 | 3 | 43 | 2 | 4 | 4 | 4 | 4 |
| 3 | 3 | 3 | 36 | 3 | 4 | 4 | 2 | 4 |
| 4 | 4 | 4 | 44 | 1 | 4 | 4 | 4 | 3 |
| 5 | 5 | 5 | 59 | 1 | 4 | 4 | 4 | 3 |
| 3 | 3 | 3 | 39 | 3 | 3 | 3 | 3 | 3 |
| 3 | 3 | 1 | 37 | 3 | 4 | 4 | 3 | 3 |

|   |   |   |    |   |   |   |   |   |
|---|---|---|----|---|---|---|---|---|
| 5 | 3 | 3 | 40 | 1 | 4 | 4 | 3 | 4 |
| 5 | 5 | 3 | 49 | 3 | 3 | 4 | 3 | 3 |
| 4 | 3 | 3 | 44 | 2 | 4 | 3 | 3 | 1 |
| 5 | 5 | 3 | 54 | 1 | 4 | 4 | 4 | 3 |
| 2 | 2 | 2 | 21 | 3 | 4 | 4 | 2 | 2 |
| 5 | 5 | 5 | 47 | 1 | 3 | 5 | 2 | 1 |
| 5 | 5 | 4 | 47 | 2 | 4 | 4 | 3 | 2 |
| 3 | 3 | 3 | 41 | 2 | 4 | 4 | 3 | 3 |
| 4 | 5 | 3 | 51 | 1 | 5 | 5 | 3 | 2 |
| 5 | 5 | 2 | 45 | 5 | 5 | 5 | 5 | 5 |
| 5 | 5 | 5 | 57 | 2 | 4 | 4 | 4 | 2 |
| 1 | 1 | 1 | 13 | 1 | 1 | 1 | 1 | 1 |
| 5 | 5 | 4 | 54 | 2 | 5 | 4 | 4 | 5 |
| 4 | 4 | 4 | 49 | 2 | 4 | 3 | 2 | 2 |
| 5 | 5 | 5 | 61 | 1 | 5 | 5 | 5 | 3 |
| 5 | 5 | 5 | 56 | 3 | 4 | 2 | 1 | 2 |
| 5 | 5 | 3 | 46 | 2 | 4 | 4 | 4 | 3 |
| 2 | 4 | 3 | 35 | 3 | 4 | 4 | 2 | 3 |
| 4 | 3 | 3 | 43 | 2 | 3 | 4 | 2 | 4 |
| 3 | 4 | 3 | 42 | 4 | 2 | 3 | 2 | 4 |
| 5 | 5 | 5 | 65 | 3 | 3 | 5 | 5 | 3 |
| 3 | 3 | 3 | 40 | 3 | 4 | 4 | 3 | 3 |
| 4 | 3 | 3 | 42 | 3 | 4 | 4 | 4 | 3 |
| 4 | 5 | 4 | 49 | 2 | 4 | 4 | 4 | 1 |
| 4 | 4 | 4 | 50 | 2 | 4 | 4 | 4 | 4 |
| 5 | 5 | 2 | 46 | 2 | 4 | 4 | 3 | 2 |
| 5 | 5 | 5 | 35 | 2 | 4 | 4 | 2 | 3 |
| 5 | 1 | 5 | 30 | 2 | 4 | 4 | 2 | 1 |
| 4 | 4 | 2 | 40 | 1 | 4 | 5 | 2 | 4 |
| 4 | 4 | 2 | 41 | 2 | 5 | 5 | 2 | 4 |
| 4 | 5 | 3 | 54 | 3 | 3 | 3 | 3 | 3 |
| 4 | 4 | 4 | 48 | 2 | 4 | 4 | 4 | 3 |
| 5 | 5 | 5 | 58 | 1 | 4 | 4 | 4 | 3 |
| 5 | 5 | 5 | 57 | 1 | 5 | 5 | 5 | 5 |
| 1 | 1 | 1 | 27 | 2 | 4 | 4 | 2 | 3 |
| 4 | 5 | 4 | 49 | 2 | 4 | 5 | 4 | 4 |
| 4 | 4 | 3 | 46 | 2 | 4 | 4 | 3 | 4 |
| 5 | 5 | 3 | 52 | 2 | 4 | 4 | 2 | 2 |
| 3 | 3 | 3 | 40 | 3 | 4 | 4 | 2 | 2 |
| 2 | 2 | 2 | 33 | 2 | 4 | 4 | 3 | 2 |
| 4 | 4 | 4 | 53 | 1 | 5 | 5 | 5 | 5 |
| 5 | 4 | 4 | 55 | 1 | 4 | 4 | 4 | 3 |
| 5 | 5 | 5 | 61 | 5 | 5 | 5 | 5 | 5 |
| 5 | 4 | 5 | 49 | 2 | 4 | 3 | 3 | 4 |
| 5 | 5 | 4 | 52 | 1 | 5 | 5 | 4 | 3 |
| 4 | 4 | 3 | 50 | 3 | 4 | 4 | 3 | 2 |
| 3 | 4 | 3 | 46 | 2 | 4 | 4 | 3 | 4 |
| 4 | 5 | 3 | 40 | 3 | 4 | 4 | 2 | 2 |
| 3 | 2 | 4 | 34 | 3 | 4 | 3 | 2 | 2 |
| 3 | 4 | 2 | 33 | 1 | 5 | 5 | 2 | 3 |
| 5 | 5 | 5 | 60 | 2 | 5 | 5 | 4 | 3 |
| 5 | 5 | 4 | 59 | 1 | 5 | 5 | 5 | 4 |
| 5 | 5 | 4 | 54 | 2 | 4 | 5 | 4 | 3 |
| 5 | 5 | 5 | 55 | 1 | 5 | 5 | 5 | 4 |

|   |   |   |    |   |   |   |   |   |
|---|---|---|----|---|---|---|---|---|
| 3 | 4 | 3 | 44 | 2 | 3 | 3 | 3 | 2 |
| 4 | 3 | 4 | 44 | 2 | 4 | 4 | 4 | 4 |
| 5 | 5 | 5 | 61 | 3 | 5 | 4 | 4 | 3 |
| 5 | 5 | 3 | 52 | 1 | 3 | 5 | 4 | 4 |
| 2 | 3 | 3 | 46 | 3 | 4 | 4 | 4 | 3 |
| 5 | 3 | 4 | 43 | 1 | 4 | 4 | 4 | 4 |
| 5 | 5 | 5 | 57 | 1 | 2 | 3 | 2 | 2 |
| 4 | 5 | 5 | 54 | 2 | 5 | 5 | 4 | 3 |
| 5 | 5 | 4 | 47 | 1 | 1 | 1 | 4 | 5 |
| 4 | 4 | 2 | 44 | 2 | 4 | 5 | 3 | 4 |
| 4 | 4 | 2 | 44 | 1 | 5 | 5 | 5 | 5 |
| 4 | 4 | 3 | 52 | 2 | 4 | 5 | 4 | 4 |
| 3 | 3 | 3 | 46 | 1 | 5 | 3 | 3 | 4 |
| 3 | 3 | 3 | 44 | 2 | 4 | 4 | 4 | 3 |
| 4 | 5 | 3 | 55 | 1 | 4 | 5 | 5 | 5 |
| 5 | 5 | 5 | 61 | 1 | 1 | 5 | 4 | 3 |
| 5 | 5 | 1 | 61 | 1 | 5 | 5 | 5 | 5 |
| 5 | 5 | 5 | 59 | 3 | 4 | 4 | 4 | 2 |
| 5 | 5 | 5 | 52 | 1 | 3 | 4 | 2 | 1 |
| 3 | 4 | 4 | 48 | 3 | 3 | 3 | 2 | 2 |
| 5 | 5 | 3 | 54 | 1 | 5 | 5 | 3 | 3 |
| 3 | 4 | 3 | 53 | 3 | 3 | 4 | 3 | 3 |
| 5 | 5 | 5 | 61 | 1 | 5 | 5 | 5 | 5 |
| 5 | 5 | 5 | 60 | 1 | 5 | 5 | 5 | 4 |
| 5 | 5 | 5 | 60 | 1 | 5 | 5 | 5 | 5 |
| 1 | 2 | 1 | 25 | 3 | 2 | 4 | 1 | 2 |
| 5 | 5 | 4 | 56 | 1 | 5 | 5 | 5 | 5 |
| 5 | 5 | 5 | 59 | 1 | 5 | 5 | 5 | 5 |
| 4 | 4 | 4 | 41 | 1 | 5 | 5 | 3 | 4 |
| 5 | 5 | 5 | 57 | 1 | 5 | 5 | 5 | 5 |
| 5 | 4 | 1 | 45 | 1 | 5 | 3 | 5 | 3 |
| 4 | 5 | 3 | 55 | 1 | 5 | 5 | 5 | 5 |
| 5 | 5 | 3 | 56 | 3 | 4 | 3 | 3 | 2 |
| 3 | 5 | 5 | 49 | 1 | 5 | 5 | 5 | 5 |
| 5 | 5 | 5 | 54 | 1 | 5 | 5 | 3 | 5 |
| 5 | 5 | 5 | 57 | 2 | 5 | 5 | 4 | 4 |
| 4 | 3 | 2 | 39 | 2 | 4 | 4 | 4 | 4 |
| 5 | 4 | 3 | 41 | 3 | 2 | 2 | 2 | 1 |
| 5 | 5 | 1 | 57 | 3 | 3 | 3 | 3 | 3 |
| 5 | 5 | 4 | 60 | 1 | 5 | 5 | 4 | 4 |
| 5 | 5 | 5 | 60 | 1 | 5 | 5 | 5 | 5 |
| 5 | 5 | 3 | 51 | 3 | 4 | 4 | 3 | 3 |
| 1 | 1 | 1 | 21 | 3 | 3 | 3 | 3 | 3 |
| 5 | 5 | 5 | 65 | 3 | 5 | 5 | 4 | 3 |
| 5 | 5 | 4 | 50 | 2 | 3 | 1 | 3 | 2 |
| 3 | 4 | 4 | 42 | 2 | 4 | 3 | 3 | 2 |
| 4 | 3 | 4 | 48 | 1 | 5 | 5 | 4 | 4 |
| 3 | 4 | 3 | 42 | 2 | 5 | 5 | 3 | 3 |
| 4 | 4 | 4 | 50 | 1 | 4 | 5 | 4 | 4 |
| 5 | 4 | 4 | 46 | 2 | 4 | 5 | 3 | 4 |
| 4 | 5 | 5 | 48 | 2 | 4 | 4 | 2 | 4 |
| 5 | 5 | 5 | 59 | 1 | 5 | 5 | 5 | 3 |
| 5 | 5 | 5 | 54 | 2 | 4 | 4 | 4 | 2 |
| 5 | 5 | 4 | 57 | 1 | 5 | 5 | 5 | 5 |



|   |   |   |    |   |   |   |   |   |
|---|---|---|----|---|---|---|---|---|
| 5 | 4 | 5 | 53 | 2 | 3 | 3 | 4 | 5 |
| 5 | 3 | 5 | 45 | 3 | 5 | 5 | 2 | 3 |
| 5 | 4 | 3 | 45 | 3 | 3 | 4 | 2 | 1 |
| 5 | 5 | 5 | 45 | 5 | 1 | 1 | 1 | 1 |
| 5 | 4 | 4 | 47 | 1 | 4 | 4 | 3 | 3 |
| 3 | 3 | 1 | 31 | 3 | 2 | 2 | 2 | 1 |
| 3 | 3 | 3 | 34 | 2 | 4 | 4 | 3 | 3 |
| 5 | 5 | 5 | 53 | 1 | 4 | 4 | 4 | 2 |
| 4 | 5 | 5 | 54 | 1 | 4 | 4 | 4 | 4 |
| 2 | 2 | 3 | 41 | 3 | 4 | 3 | 2 | 1 |
| 4 | 3 | 3 | 51 | 2 | 5 | 5 | 4 | 3 |
| 3 | 3 | 5 | 43 | 2 | 4 | 5 | 3 | 1 |
| 4 | 5 | 4 | 46 | 2 | 4 | 3 | 4 | 2 |
| 5 | 5 | 4 | 58 | 1 | 5 | 5 | 5 | 4 |
| 5 | 5 | 4 | 58 | 1 | 5 | 5 | 5 | 5 |
| 3 | 3 | 3 | 45 | 3 | 3 | 3 | 4 | 3 |
| 4 | 4 | 4 | 47 | 2 | 4 | 4 | 4 | 2 |
| 5 | 5 | 3 | 49 | 2 | 4 | 5 | 4 | 4 |
| 5 | 5 | 4 | 47 | 3 | 4 | 4 | 3 | 2 |
| 5 | 5 | 5 | 59 | 2 | 4 | 4 | 3 | 4 |
| 4 | 3 | 4 | 43 | 2 | 4 | 4 | 3 | 3 |
| 4 | 3 | 3 | 28 | 4 | 3 | 3 | 2 | 2 |
| 5 | 5 | 5 | 65 | 5 | 5 | 5 | 5 | 5 |
| 5 | 5 | 5 | 59 | 1 | 5 | 5 | 5 | 4 |
| 4 | 5 | 3 | 49 | 3 | 5 | 5 | 4 | 4 |
| 4 | 4 | 3 | 45 | 3 | 3 | 2 | 3 | 2 |
| 3 | 3 | 3 | 37 | 3 | 3 | 3 | 2 | 3 |
| 5 | 5 | 4 | 55 | 1 | 5 | 5 | 4 | 4 |
| 2 | 2 | 2 | 26 | 3 | 3 | 3 | 3 | 3 |
| 4 | 4 | 4 | 48 | 2 | 4 | 4 | 4 | 3 |
| 3 | 3 | 3 | 58 | 2 | 4 | 4 | 3 | 3 |
| 4 | 3 | 3 | 41 | 4 | 2 | 3 | 2 | 1 |
| 5 | 5 | 3 | 40 | 3 | 3 | 5 | 3 | 1 |
| 5 | 5 | 5 | 57 | 2 | 5 | 4 | 3 | 3 |
| 5 | 3 | 4 | 51 | 3 | 4 | 4 | 3 | 3 |
| 4 | 4 | 4 | 48 | 2 | 4 | 4 | 4 | 3 |
| 5 | 5 | 3 | 50 | 1 | 5 | 4 | 4 | 3 |
| 5 | 5 | 4 | 57 | 3 | 4 | 4 | 4 | 3 |
| 4 | 4 | 3 | 54 | 2 | 4 | 4 | 3 | 2 |
| 5 | 5 | 5 | 46 | 3 | 5 | 5 | 4 | 2 |
| 4 | 4 | 4 | 60 | 1 | 4 | 4 | 4 | 4 |
| 5 | 5 | 5 | 50 | 4 | 5 | 4 | 4 | 3 |
| 4 | 3 | 4 | 61 | 2 | 4 | 4 | 3 | 3 |
| 5 | 5 | 4 | 41 | 2 | 4 | 4 | 4 | 4 |
| 5 | 3 | 5 | 53 | 3 | 2 | 3 | 2 | 2 |
| 5 | 5 | 5 | 35 | 2 | 5 | 5 | 2 | 4 |
| 5 | 5 | 5 | 61 | 2 | 5 | 5 | 5 | 4 |
| 4 | 4 | 4 | 61 | 2 | 4 | 5 | 4 | 4 |
| 4 | 4 | 4 | 48 | 2 | 4 | 4 | 5 | 4 |
| 4 | 5 | 5 | 51 | 1 | 3 | 5 | 5 | 4 |
| 5 | 5 | 5 | 55 | 1 | 4 | 4 | 5 | 4 |
| 2 | 3 | 3 | 57 | 1 | 4 | 4 | 3 | 4 |
| 5 | 4 | 1 | 36 | 1 | 5 | 5 | 5 | 5 |
| 3 | 3 | 2 | 47 | 2 | 4 | 4 | 3 | 3 |

|   |   |   |    |   |   |   |   |   |
|---|---|---|----|---|---|---|---|---|
| 5 | 5 | 5 | 54 | 3 | 5 | 5 | 4 | 3 |
| 4 | 4 | 4 | 54 | 1 | 4 | 4 | 4 | 4 |
| 3 | 3 | 4 | 50 | 2 | 4 | 4 | 4 | 4 |
| 1 | 1 | 1 | 44 | 1 | 5 | 5 | 5 | 5 |
| 5 | 5 | 5 | 13 | 1 | 5 | 5 | 5 | 5 |
| 3 | 3 | 2 | 60 | 2 | 4 | 4 | 3 | 3 |

| C6 | C7 | C8 | C9 | C10 | C11 | C12 | C13 | C14 |   |
|----|----|----|----|-----|-----|-----|-----|-----|---|
| 5  | 5  | 5  | 5  | 5   | 5   | 5   | 5   | 5   | 5 |
| 3  | 4  | 4  | 4  | 4   | 3   | 4   | 1   | 3   | 3 |
| 5  | 3  | 5  | 5  | 5   | 5   | 5   | 5   | 5   | 5 |
| 4  | 3  | 2  | 3  | 3   | 2   | 4   | 4   | 4   | 4 |
| 4  | 4  | 3  | 3  | 3   | 3   | 3   | 3   | 2   | 3 |
| 5  | 5  | 5  | 5  | 5   | 5   | 5   | 5   | 5   | 5 |
| 2  | 4  | 1  | 2  | 5   | 4   | 2   | 2   | 2   | 2 |
| 4  | 4  | 1  | 4  | 2   | 4   | 2   | 3   | 3   | 4 |
| 5  | 1  | 5  | 2  | 4   | 3   | 3   | 3   | 3   | 3 |
| 5  | 1  | 5  | 5  | 5   | 5   | 5   | 5   | 5   | 5 |
| 5  | 2  | 1  | 1  | 1   | 5   | 3   | 3   | 3   | 5 |
| 4  | 3  | 2  | 2  | 2   | 2   | 4   | 3   | 2   | 4 |
| 5  | 1  | 2  | 2  | 1   | 4   | 4   | 5   | 5   | 5 |
| 1  | 5  | 5  | 5  | 5   | 5   | 5   | 5   | 5   | 5 |
| 4  | 3  | 2  | 5  | 5   | 5   | 4   | 3   | 4   | 4 |
| 5  | 5  | 5  | 5  | 5   | 5   | 5   | 5   | 5   | 5 |
| 4  | 3  | 2  | 2  | 2   | 2   | 4   | 3   | 2   | 4 |
| 5  | 5  | 5  | 5  | 5   | 5   | 5   | 1   | 5   | 5 |
| 3  | 4  | 2  | 2  | 2   | 2   | 4   | 2   | 2   | 4 |
| 3  | 4  | 2  | 3  | 2   | 5   | 3   | 2   | 3   | 3 |
| 4  | 4  | 5  | 5  | 5   | 4   | 5   | 3   | 3   | 3 |
| 5  | 5  | 5  | 5  | 5   | 5   | 5   | 5   | 5   | 5 |
| 5  | 1  | 1  | 1  | 1   | 5   | 5   | 5   | 5   | 5 |
| 5  | 1  | 1  | 1  | 1   | 5   | 5   | 5   | 5   | 5 |
| 2  | 4  | 2  | 2  | 2   | 2   | 4   | 2   | 2   | 2 |
| 3  | 4  | 2  | 2  | 1   | 4   | 3   | 2   | 3   | 3 |
| 3  | 3  | 1  | 3  | 2   | 4   | 3   | 3   | 3   | 3 |
| 4  | 2  | 3  | 2  | 2   | 4   | 4   | 4   | 4   | 4 |
| 4  | 1  | 1  | 1  | 1   | 5   | 4   | 2   | 4   | 4 |
| 4  | 3  | 2  | 3  | 2   | 4   | 2   | 2   | 4   | 4 |
| 5  | 2  | 2  | 2  | 1   | 5   | 5   | 5   | 5   | 5 |
| 5  | 1  | 1  | 1  | 1   | 5   | 5   | 5   | 5   | 5 |
| 5  | 1  | 2  | 2  | 1   | 4   | 4   | 4   | 4   | 4 |
| 5  | 2  | 3  | 4  | 1   | 5   | 4   | 3   | 5   | 5 |
| 3  | 2  | 1  | 1  | 1   | 4   | 3   | 2   | 4   | 4 |
| 4  | 3  | 1  | 3  | 1   | 4   | 4   | 4   | 5   | 5 |
| 5  | 1  | 1  | 1  | 5   | 5   | 5   | 5   | 5   | 5 |
| 5  | 5  | 5  | 5  | 5   | 5   | 5   | 5   | 5   | 5 |
| 4  | 3  | 2  | 2  | 1   | 5   | 5   | 5   | 5   | 5 |
| 5  | 1  | 1  | 2  | 2   | 2   | 5   | 5   | 5   | 5 |
| 4  | 1  | 1  | 1  | 1   | 4   | 4   | 4   | 4   | 4 |
| 4  | 1  | 2  | 2  | 2   | 4   | 4   | 4   | 4   | 4 |
| 4  | 1  | 1  | 1  | 1   | 4   | 4   | 4   | 4   | 4 |
| 4  | 2  | 2  | 2  | 1   | 3   | 4   | 3   | 4   | 4 |
| 4  | 2  | 2  | 2  | 2   | 4   | 4   | 2   | 4   | 4 |
| 4  | 4  | 4  | 4  | 4   | 4   | 4   | 4   | 4   | 4 |
| 4  | 2  | 2  | 2  | 2   | 4   | 4   | 4   | 4   | 4 |
| 5  | 5  | 5  | 5  | 5   | 5   | 5   | 5   | 5   | 5 |
| 3  | 3  | 3  | 3  | 3   | 3   | 3   | 3   | 3   | 3 |
| 1  | 4  | 5  | 5  | 5   | 5   | 1   | 5   | 5   | 5 |
| 4  | 3  | 1  | 4  | 2   | 5   | 5   | 5   | 5   | 5 |
| 5  | 1  | 3  | 1  | 1   | 5   | 5   | 5   | 5   | 5 |
| 5  | 3  | 3  | 3  | 4   | 4   | 4   | 3   | 4   | 4 |

|   |   |   |   |   |   |   |   |   |
|---|---|---|---|---|---|---|---|---|
| 4 | 4 | 2 | 4 | 2 | 4 | 3 | 3 | 4 |
| 4 | 2 | 2 | 2 | 1 | 3 | 3 | 4 | 4 |
| 5 | 5 | 5 | 5 | 5 | 4 | 5 | 4 | 4 |
| 5 | 5 | 5 | 4 | 5 | 5 | 5 | 4 | 5 |
| 5 | 2 | 5 | 3 | 3 | 5 | 5 | 5 | 5 |
| 4 | 2 | 1 | 1 | 1 | 4 | 3 | 3 | 4 |
| 5 | 1 | 1 | 1 | 1 | 5 | 5 | 5 | 5 |
| 5 | 1 | 5 | 1 | 1 | 5 | 5 | 5 | 5 |
| 5 | 2 | 2 | 2 | 1 | 5 | 3 | 2 | 4 |
| 4 | 4 | 2 | 1 | 2 | 3 | 3 | 3 | 3 |
| 4 | 2 | 2 | 2 | 2 | 5 | 3 | 3 | 4 |
| 5 | 2 | 4 | 2 | 4 | 4 | 4 | 4 | 4 |
| 5 | 1 | 5 | 1 | 1 | 5 | 5 | 5 | 5 |
| 4 | 1 | 5 | 5 | 1 | 1 | 3 | 3 | 2 |
| 5 | 2 | 2 | 1 | 1 | 4 | 4 | 4 | 4 |
| 5 | 3 | 1 | 2 | 1 | 5 | 3 | 3 | 5 |
| 5 | 1 | 1 | 1 | 1 | 5 | 5 | 5 | 5 |
| 5 | 2 | 2 | 2 | 2 | 5 | 5 | 5 | 5 |
| 5 | 2 | 2 | 2 | 2 | 4 | 4 | 2 | 4 |
| 4 | 2 | 3 | 2 | 1 | 5 | 3 | 3 | 4 |
| 5 | 2 | 4 | 2 | 1 | 5 | 4 | 3 | 4 |
| 5 | 3 | 1 | 1 | 1 | 5 | 3 | 4 | 4 |
| 1 | 5 | 3 | 1 | 5 | 5 | 5 | 5 | 5 |
| 4 | 4 | 4 | 4 | 3 | 4 | 3 | 3 | 4 |
| 1 | 1 | 5 | 3 | 3 | 3 | 3 | 3 | 2 |
| 4 | 2 | 5 | 1 | 1 | 4 | 1 | 4 | 2 |
| 4 | 1 | 1 | 1 | 1 | 4 | 4 | 4 | 4 |
| 3 | 3 | 3 | 2 | 1 | 3 | 3 | 3 | 5 |
| 3 | 3 | 3 | 3 | 3 | 3 | 3 | 3 | 3 |
| 3 | 3 | 3 | 3 | 3 | 3 | 3 | 3 | 3 |
| 3 | 3 | 3 | 3 | 3 | 3 | 2 | 3 | 3 |
| 3 | 1 | 1 | 2 | 1 | 4 | 3 | 1 | 3 |
| 5 | 1 | 2 | 2 | 1 | 5 | 5 | 5 | 5 |
| 3 | 3 | 3 | 3 | 2 | 2 | 2 | 2 | 2 |
| 3 | 2 | 2 | 2 | 1 | 5 | 3 | 3 | 5 |
| 5 | 1 | 4 | 1 | 1 | 5 | 5 | 5 | 5 |
| 5 | 1 | 1 | 1 | 1 | 5 | 4 | 4 | 5 |
| 3 | 2 | 1 | 1 | 1 | 3 | 2 | 2 | 3 |
| 4 | 2 | 4 | 3 | 2 | 4 | 1 | 2 | 3 |
| 5 | 1 | 1 | 1 | 1 | 5 | 5 | 3 | 5 |
| 2 | 3 | 4 | 2 | 2 | 4 | 3 | 2 | 3 |
| 4 | 2 | 2 | 2 | 2 | 4 | 4 | 4 | 4 |
| 3 | 4 | 3 | 2 | 1 | 3 | 3 | 1 | 1 |
| 5 | 1 | 1 | 2 | 1 | 5 | 5 | 5 | 5 |
| 2 | 4 | 4 | 2 | 1 | 5 | 3 | 3 | 4 |
| 4 | 3 | 3 | 2 | 2 | 1 | 5 | 1 | 3 |
| 4 | 4 | 4 | 4 | 4 | 4 | 4 | 4 | 4 |
| 3 | 3 | 1 | 1 | 1 | 5 | 3 | 2 | 3 |
| 5 | 1 | 5 | 1 | 1 | 5 | 5 | 5 | 5 |
| 4 | 1 | 2 | 4 | 2 | 5 | 2 | 1 | 5 |
| 4 | 3 | 3 | 4 | 2 | 4 | 2 | 2 | 4 |
| 4 | 2 | 2 | 3 | 2 | 4 | 4 | 4 | 4 |
| 2 | 2 | 2 | 2 | 2 | 2 | 2 | 2 | 2 |
| 2 | 4 | 4 | 4 | 2 | 3 | 2 | 2 | 3 |

|   |   |   |   |   |   |   |   |   |
|---|---|---|---|---|---|---|---|---|
| 3 | 3 | 3 | 3 | 3 | 3 | 3 | 3 | 3 |
| 2 | 4 | 3 | 2 | 4 | 4 | 2 | 1 | 1 |
| 4 | 4 | 2 | 4 | 1 | 4 | 4 | 1 | 5 |
| 5 | 3 | 1 | 1 | 1 | 5 | 5 | 5 | 5 |
| 5 | 2 | 1 | 1 | 1 | 5 | 5 | 5 | 5 |
| 5 | 3 | 2 | 2 | 1 | 5 | 2 | 1 | 5 |
| 4 | 4 | 3 | 3 | 2 | 4 | 2 | 2 | 3 |
| 3 | 2 | 4 | 1 | 1 | 5 | 3 | 5 | 4 |
| 5 | 1 | 1 | 1 | 1 | 5 | 4 | 4 | 5 |
| 3 | 3 | 3 | 3 | 3 | 3 | 3 | 3 | 3 |
| 3 | 3 | 3 | 3 | 3 | 3 | 3 | 3 | 3 |
| 5 | 2 | 1 | 1 | 1 | 5 | 4 | 1 | 4 |
| 5 | 2 | 1 | 1 | 1 | 5 | 5 | 3 | 5 |
| 4 | 2 | 2 | 5 | 2 | 4 | 3 | 3 | 5 |
| 4 | 1 | 1 | 1 | 1 | 5 | 4 | 4 | 4 |
| 4 | 2 | 2 | 2 | 2 | 4 | 4 | 3 | 4 |
| 4 | 3 | 2 | 1 | 1 | 4 | 4 | 5 | 5 |
| 5 | 2 | 2 | 2 | 2 | 5 | 2 | 2 | 5 |
| 3 | 2 | 1 | 1 | 2 | 4 | 3 | 2 | 3 |
| 4 | 2 | 4 | 4 | 1 | 4 | 4 | 4 | 4 |
| 4 | 3 | 2 | 1 | 1 | 4 | 4 | 4 | 4 |
| 5 | 1 | 1 | 1 | 1 | 5 | 5 | 5 | 5 |
| 3 | 3 | 3 | 3 | 3 | 3 | 3 | 3 | 3 |
| 4 | 3 | 4 | 3 | 3 | 3 | 3 | 3 | 3 |
| 2 | 2 | 2 | 2 | 2 | 4 | 2 | 4 | 4 |
| 3 | 4 | 3 | 3 | 2 | 3 | 1 | 2 | 3 |
| 2 | 3 | 3 | 2 | 3 | 2 | 2 | 3 | 2 |
| 3 | 3 | 3 | 3 | 2 | 4 | 2 | 2 | 2 |
| 4 | 5 | 4 | 2 | 1 | 4 | 1 | 1 | 4 |
| 5 | 2 | 2 | 1 | 1 | 5 | 4 | 4 | 5 |
| 4 | 2 | 2 | 2 | 2 | 4 | 4 | 4 | 4 |
| 5 | 3 | 2 | 2 | 2 | 5 | 2 | 2 | 5 |
| 4 | 4 | 1 | 3 | 3 | 3 | 3 | 3 | 3 |
| 1 | 3 | 1 | 5 | 5 | 1 | 1 | 1 | 1 |
| 3 | 3 | 4 | 2 | 3 | 5 | 4 | 5 | 5 |
| 5 | 2 | 2 | 1 | 1 | 5 | 4 | 4 | 4 |
| 3 | 3 | 3 | 3 | 3 | 3 | 5 | 3 | 4 |
| 5 | 1 | 1 | 1 | 1 | 5 | 5 | 2 | 5 |
| 4 | 1 | 1 | 1 | 1 | 4 | 2 | 1 | 4 |
| 3 | 3 | 1 | 3 | 2 | 3 | 1 | 1 | 5 |
| 5 | 1 | 1 | 1 | 1 | 4 | 4 | 4 | 5 |
| 1 | 5 | 3 | 4 | 5 | 2 | 1 | 1 | 1 |
| 3 | 3 | 3 | 3 | 3 | 1 | 2 | 3 | 3 |
| 4 | 4 | 4 | 3 | 2 | 4 | 2 | 2 | 3 |
| 5 | 3 | 1 | 1 | 1 | 5 | 5 | 1 | 5 |
| 5 | 2 | 4 | 2 | 2 | 5 | 2 | 2 | 5 |
| 2 | 4 | 1 | 2 | 2 | 2 | 1 | 1 | 1 |
| 5 | 3 | 2 | 2 | 2 | 5 | 3 | 3 | 5 |
| 4 | 2 | 2 | 2 | 2 | 4 | 4 | 4 | 4 |
| 3 | 4 | 3 | 2 | 1 | 4 | 2 | 2 | 4 |
| 5 | 2 | 2 | 1 | 1 | 5 | 5 | 3 | 4 |
| 5 | 5 | 5 | 1 | 1 | 5 | 3 | 3 | 5 |
| 4 | 5 | 3 | 1 | 2 | 4 | 2 | 3 | 4 |
| 4 | 2 | 2 | 3 | 2 | 4 | 4 | 3 | 4 |

|   |   |   |   |   |   |   |   |   |
|---|---|---|---|---|---|---|---|---|
| 5 | 1 | 1 | 1 | 1 | 5 | 3 | 3 | 4 |
| 3 | 2 | 2 | 3 | 1 | 4 | 3 | 2 | 3 |
| 5 | 1 | 1 | 2 | 1 | 5 | 4 | 4 | 5 |
| 4 | 3 | 3 | 3 | 2 | 4 | 3 | 4 | 3 |
| 5 | 2 | 2 | 1 | 1 | 5 | 4 | 4 | 5 |
| 4 | 4 | 4 | 4 | 2 | 4 | 4 | 4 | 4 |
| 4 | 3 | 2 | 2 | 1 | 4 | 3 | 3 | 4 |
| 4 | 2 | 2 | 2 | 2 | 4 | 4 | 4 | 4 |
| 2 | 4 | 4 | 4 | 3 | 3 | 3 | 3 | 3 |
| 4 | 3 | 2 | 1 | 1 | 4 | 3 | 4 | 4 |
| 4 | 2 | 2 | 2 | 2 | 4 | 3 | 4 | 4 |
| 5 | 3 | 2 | 1 | 1 | 5 | 4 | 4 | 5 |
| 3 | 3 | 3 | 3 | 2 | 3 | 3 | 3 | 3 |
| 5 | 1 | 1 | 1 | 1 | 5 | 5 | 5 | 5 |
| 3 | 3 | 2 | 2 | 2 | 3 | 3 | 3 | 3 |
| 4 | 4 | 3 | 1 | 1 | 5 | 2 | 3 | 4 |
| 5 | 2 | 2 | 3 | 1 | 5 | 4 | 4 | 4 |
| 4 | 2 | 1 | 1 | 1 | 4 | 3 | 2 | 4 |
| 4 | 4 | 1 | 3 | 3 | 3 | 3 | 3 | 3 |
| 5 | 1 | 1 | 1 | 1 | 5 | 4 | 5 | 5 |
| 4 | 1 | 2 | 1 | 1 | 5 | 2 | 3 | 4 |
| 5 | 2 | 2 | 2 | 1 | 5 | 5 | 4 | 5 |
| 4 | 2 | 1 | 1 | 1 | 4 | 4 | 1 | 3 |
| 5 | 2 | 1 | 1 | 1 | 5 | 5 | 5 | 5 |
| 1 | 5 | 3 | 1 | 1 | 1 | 1 | 1 | 1 |
| 4 | 2 | 3 | 1 | 1 | 5 | 3 | 4 | 3 |
| 4 | 2 | 2 | 3 | 2 | 4 | 2 | 4 | 4 |
| 4 | 3 | 1 | 1 | 2 | 2 | 4 | 3 | 3 |
| 1 | 5 | 1 | 5 | 4 | 4 | 1 | 1 | 1 |
| 5 | 1 | 1 | 1 | 1 | 5 | 5 | 2 | 5 |
| 3 | 4 | 3 | 2 | 2 | 4 | 3 | 4 | 3 |
| 5 | 1 | 1 | 1 | 1 | 5 | 5 | 5 | 5 |
| 5 | 1 | 1 | 1 | 1 | 5 | 5 | 3 | 5 |
| 5 | 3 | 1 | 1 | 1 | 5 | 3 | 4 | 5 |
| 4 | 3 | 3 | 3 | 3 | 3 | 3 | 1 | 1 |
| 4 | 2 | 2 | 2 | 1 | 2 | 3 | 5 | 2 |
| 4 | 3 | 3 | 3 | 2 | 2 | 3 | 4 | 4 |
| 5 | 2 | 2 | 1 | 2 | 5 | 5 | 4 | 5 |
| 4 | 3 | 4 | 3 | 2 | 4 | 3 | 3 | 4 |
| 5 | 4 | 4 | 2 | 1 | 5 | 5 | 5 | 5 |
| 5 | 4 | 3 | 3 | 1 | 5 | 4 | 3 | 5 |
| 5 | 2 | 4 | 2 | 2 | 4 | 4 | 4 | 4 |
| 4 | 2 | 3 | 2 | 1 | 5 | 2 | 4 | 4 |
| 4 | 2 | 3 | 2 | 1 | 5 | 3 | 3 | 4 |
| 4 | 4 | 3 | 3 | 2 | 4 | 3 | 3 | 4 |
| 3 | 3 | 2 | 1 | 2 | 4 | 3 | 3 | 3 |
| 3 | 3 | 3 | 3 | 3 | 3 | 3 | 3 | 3 |
| 5 | 1 | 1 | 1 | 2 | 5 | 5 | 5 | 5 |
| 5 | 5 | 1 | 1 | 1 | 5 | 4 | 5 | 5 |
| 5 | 1 | 1 | 1 | 1 | 5 | 5 | 5 | 5 |
| 5 | 2 | 2 | 1 | 1 | 3 | 5 | 4 | 5 |
| 4 | 1 | 1 | 1 | 1 | 4 | 4 | 1 | 4 |
| 3 | 3 | 3 | 3 | 3 | 3 | 3 | 3 | 3 |
| 5 | 4 | 4 | 1 | 1 | 4 | 2 | 3 | 5 |

|   |   |   |   |   |   |   |   |   |
|---|---|---|---|---|---|---|---|---|
| 5 | 3 | 3 | 3 | 3 | 5 | 5 | 3 | 5 |
| 5 | 3 | 4 | 2 | 1 | 5 | 5 | 5 | 5 |
| 5 | 1 | 4 | 1 | 1 | 4 | 3 | 5 | 5 |
| 4 | 3 | 2 | 1 | 1 | 5 | 3 | 2 | 4 |
| 3 | 4 | 3 | 2 | 1 | 5 | 3 | 4 | 2 |
| 5 | 5 | 5 | 5 | 5 | 5 | 5 | 5 | 5 |
| 4 | 4 | 4 | 4 | 4 | 4 | 4 | 4 | 4 |
| 5 | 1 | 1 | 1 | 1 | 5 | 4 | 4 | 4 |
| 4 | 4 | 2 | 2 | 2 | 4 | 2 | 2 | 3 |
| 5 | 2 | 2 | 2 | 2 | 5 | 2 | 5 | 4 |
| 3 | 3 | 3 | 3 | 3 | 3 | 3 | 3 | 3 |
| 5 | 1 | 1 | 2 | 1 | 5 | 3 | 5 | 5 |
| 1 | 1 | 1 | 1 | 1 | 1 | 1 | 1 | 1 |
| 4 | 3 | 3 | 1 | 1 | 4 | 4 | 2 | 5 |
| 4 | 3 | 4 | 3 | 1 | 2 | 3 | 2 | 4 |
| 5 | 3 | 5 | 3 | 2 | 5 | 5 | 5 | 5 |
| 5 | 4 | 4 | 2 | 3 | 3 | 3 | 3 | 3 |
| 4 | 1 | 1 | 3 | 2 | 4 | 4 | 3 | 4 |
| 4 | 3 | 4 | 2 | 2 | 5 | 3 | 3 | 3 |
| 4 | 1 | 1 | 1 | 1 | 4 | 4 | 4 | 4 |
| 4 | 4 | 4 | 4 | 3 | 2 | 4 | 4 | 5 |
| 4 | 4 | 2 | 2 | 2 | 4 | 4 | 4 | 4 |
| 5 | 2 | 2 | 2 | 2 | 5 | 5 | 5 | 5 |
| 5 | 5 | 1 | 1 | 1 | 5 | 5 | 5 | 5 |
| 3 | 3 | 3 | 3 | 2 | 4 | 3 | 3 | 4 |
| 4 | 4 | 4 | 2 | 2 | 4 | 2 | 2 | 3 |
| 3 | 3 | 2 | 3 | 2 | 4 | 3 | 3 | 3 |
| 5 | 3 | 3 | 1 | 1 | 1 | 5 | 3 | 5 |
| 4 | 5 | 5 | 5 | 5 | 5 | 4 | 4 | 5 |
| 5 | 1 | 1 | 1 | 1 | 5 | 2 | 4 | 5 |
| 3 | 3 | 3 | 3 | 3 | 3 | 3 | 3 | 3 |
| 1 | 5 | 4 | 4 | 4 | 3 | 3 | 1 | 1 |
| 2 | 4 | 1 | 3 | 3 | 2 | 2 | 2 | 2 |
| 5 | 5 | 5 | 5 | 5 | 5 | 5 | 5 | 5 |
| 4 | 2 | 3 | 1 | 1 | 4 | 3 | 3 | 4 |
| 4 | 3 | 2 | 2 | 2 | 5 | 3 | 3 | 4 |
| 3 | 2 | 1 | 1 | 1 | 5 | 3 | 3 | 3 |
| 5 | 2 | 3 | 1 | 1 | 5 | 4 | 1 | 4 |
| 4 | 4 | 4 | 4 | 4 | 4 | 4 | 4 | 4 |
| 5 | 5 | 5 | 3 | 3 | 5 | 4 | 5 | 5 |
| 4 | 2 | 2 | 2 | 1 | 4 | 4 | 4 | 4 |
| 4 | 3 | 3 | 3 | 1 | 3 | 3 | 3 | 3 |
| 3 | 4 | 1 | 4 | 1 | 4 | 3 | 4 | 5 |
| 5 | 3 | 1 | 1 | 1 | 5 | 4 | 2 | 5 |
| 5 | 3 | 3 | 3 | 3 | 5 | 5 | 3 | 5 |
| 5 | 2 | 3 | 2 | 1 | 5 | 3 | 3 | 4 |
| 3 | 4 | 3 | 3 | 2 | 4 | 3 | 3 | 3 |
| 4 | 3 | 2 | 2 | 2 | 4 | 3 | 3 | 4 |
| 4 | 3 | 2 | 1 | 1 | 5 | 4 | 3 | 5 |
| 4 | 2 | 2 | 1 | 1 | 4 | 4 | 3 | 4 |
| 4 | 4 | 3 | 3 | 3 | 4 | 3 | 4 | 4 |
| 5 | 1 | 4 | 1 | 1 | 5 | 5 | 4 | 5 |
| 3 | 3 | 3 | 3 | 3 | 3 | 3 | 3 | 3 |
| 4 | 3 | 2 | 3 | 2 | 4 | 2 | 2 | 4 |

|   |   |   |   |   |   |   |   |   |
|---|---|---|---|---|---|---|---|---|
| 5 | 3 | 1 | 2 | 1 | 5 | 5 | 4 | 5 |
| 4 | 1 | 1 | 1 | 1 | 4 | 4 | 3 | 4 |
| 3 | 4 | 3 | 4 | 1 | 5 | 2 | 2 | 4 |
| 3 | 3 | 3 | 1 | 3 | 4 | 3 | 3 | 3 |
| 3 | 3 | 3 | 3 | 3 | 3 | 3 | 3 | 3 |
| 5 | 1 | 5 | 2 | 1 | 5 | 5 | 5 | 5 |
| 4 | 1 | 1 | 1 | 1 | 5 | 5 | 5 | 5 |
| 4 | 4 | 3 | 3 | 1 | 1 | 4 | 4 | 4 |
| 4 | 3 | 1 | 4 | 1 | 5 | 3 | 2 | 4 |
| 2 | 5 | 3 | 1 | 3 | 3 | 1 | 1 | 1 |
| 3 | 1 | 1 | 3 | 1 | 4 | 3 | 1 | 5 |
| 3 | 2 | 4 | 1 | 1 | 5 | 4 | 4 | 2 |
| 2 | 2 | 2 | 2 | 2 | 4 | 2 | 2 | 2 |
| 5 | 3 | 2 | 2 | 1 | 4 | 3 | 4 | 5 |
| 5 | 1 | 1 | 1 | 1 | 5 | 3 | 2 | 5 |
| 5 | 2 | 2 | 2 | 2 | 5 | 5 | 5 | 5 |
| 3 | 3 | 3 | 3 | 3 | 3 | 3 | 3 | 3 |
| 5 | 4 | 2 | 1 | 1 | 5 | 4 | 4 | 5 |
| 5 | 1 | 1 | 1 | 1 | 4 | 5 | 4 | 5 |
| 3 | 4 | 3 | 3 | 1 | 4 | 2 | 2 | 3 |
| 4 | 3 | 3 | 4 | 4 | 5 | 4 | 4 | 4 |
| 4 | 3 | 2 | 2 | 1 | 4 | 3 | 4 | 4 |
| 5 | 5 | 2 | 3 | 1 | 1 | 4 | 4 | 4 |
| 3 | 2 | 2 | 2 | 2 | 4 | 3 | 3 | 2 |
| 5 | 1 | 2 | 1 | 3 | 5 | 5 | 5 | 5 |
| 5 | 5 | 1 | 5 | 1 | 5 | 1 | 1 | 4 |
| 4 | 2 | 3 | 3 | 2 | 5 | 4 | 3 | 4 |
| 4 | 4 | 3 | 2 | 2 | 4 | 3 | 3 | 4 |
| 5 | 1 | 5 | 1 | 5 | 5 | 5 | 3 | 5 |
| 5 | 1 | 1 | 1 | 1 | 5 | 4 | 2 | 5 |
| 5 | 1 | 1 | 1 | 1 | 5 | 5 | 4 | 5 |
| 4 | 3 | 2 | 2 | 1 | 4 | 3 | 2 | 4 |
| 1 | 3 | 3 | 2 | 2 | 4 | 2 | 2 | 1 |
| 5 | 5 | 5 | 5 | 5 | 5 | 5 | 5 | 4 |
| 3 | 3 | 3 | 2 | 2 | 4 | 3 | 3 | 3 |
| 4 | 3 | 2 | 1 | 1 | 4 | 3 | 3 | 4 |
| 5 | 3 | 3 | 1 | 1 | 5 | 5 | 5 | 5 |
| 5 | 2 | 2 | 2 | 1 | 5 | 4 | 3 | 4 |
| 4 | 2 | 2 | 4 | 4 | 5 | 3 | 4 | 4 |
| 4 | 4 | 4 | 3 | 4 | 3 | 3 | 4 | 4 |
| 4 | 2 | 2 | 2 | 2 | 4 | 4 | 4 | 4 |
| 3 | 4 | 3 | 4 | 3 | 4 | 3 | 3 | 3 |
| 4 | 4 | 2 | 2 | 2 | 4 | 3 | 3 | 4 |
| 4 | 4 | 2 | 2 | 1 | 5 | 3 | 3 | 5 |
| 4 | 4 | 2 | 2 | 2 | 4 | 3 | 3 | 4 |
| 3 | 3 | 2 | 4 | 3 | 4 | 2 | 2 | 2 |
| 4 | 2 | 3 | 4 | 4 | 4 | 3 | 4 | 4 |
| 4 | 2 | 1 | 2 | 1 | 4 | 4 | 4 | 4 |
| 5 | 1 | 1 | 1 | 1 | 5 | 2 | 2 | 5 |
| 3 | 5 | 2 | 2 | 1 | 4 | 2 | 2 | 4 |
| 4 | 4 | 2 | 3 | 2 | 4 | 2 | 1 | 4 |
| 4 | 2 | 2 | 2 | 1 | 5 | 4 | 4 | 4 |
| 4 | 3 | 2 | 4 | 2 | 4 | 4 | 2 | 4 |
| 2 | 4 | 2 | 4 | 3 | 3 | 2 | 2 | 2 |



|   |   |   |   |   |   |   |   |   |
|---|---|---|---|---|---|---|---|---|
| 4 | 3 | 2 | 1 | 1 | 4 | 4 | 5 | 4 |
| 4 | 4 | 2 | 2 | 2 | 4 | 4 | 4 | 4 |
| 4 | 3 | 2 | 3 | 2 | 4 | 4 | 4 | 4 |
| 5 | 2 | 4 | 1 | 1 | 5 | 4 | 4 | 5 |
| 4 | 5 | 5 | 5 | 2 | 4 | 4 | 4 | 4 |
| 4 | 4 | 2 | 4 | 2 | 4 | 2 | 2 | 2 |
| 4 | 3 | 2 | 2 | 1 | 4 | 4 | 3 | 4 |
| 3 | 4 | 2 | 2 | 2 | 4 | 2 | 2 | 4 |
| 4 | 4 | 2 | 2 | 2 | 4 | 2 | 2 | 4 |
| 4 | 3 | 4 | 3 | 3 | 4 | 3 | 4 | 4 |
| 4 | 4 | 1 | 1 | 1 | 4 | 3 | 2 | 4 |
| 4 | 2 | 2 | 2 | 2 | 4 | 4 | 4 | 4 |
| 4 | 4 | 4 | 4 | 4 | 4 | 4 | 4 | 4 |
| 4 | 4 | 2 | 2 | 2 | 4 | 4 | 4 | 4 |
| 4 | 2 | 4 | 2 | 1 | 4 | 4 | 4 | 4 |
| 4 | 4 | 4 | 4 | 4 | 4 | 4 | 4 | 4 |
| 4 | 4 | 4 | 4 | 4 | 4 | 4 | 4 | 4 |
| 4 | 2 | 2 | 3 | 1 | 4 | 4 | 3 | 5 |
| 4 | 3 | 2 | 2 | 1 | 4 | 3 | 3 | 4 |
| 4 | 3 | 3 | 3 | 3 | 3 | 3 | 3 | 3 |
| 4 | 4 | 2 | 2 | 1 | 4 | 4 | 4 | 4 |
| 4 | 4 | 4 | 2 | 2 | 4 | 2 | 3 | 3 |
| 5 | 3 | 1 | 3 | 1 | 5 | 4 | 3 | 5 |
| 4 | 3 | 2 | 2 | 2 | 4 | 3 | 3 | 3 |
| 4 | 4 | 3 | 2 | 2 | 4 | 3 | 4 | 4 |
| 5 | 1 | 1 | 2 | 1 | 5 | 5 | 5 | 4 |
| 4 | 2 | 1 | 2 | 2 | 4 | 3 | 4 | 4 |
| 3 | 4 | 2 | 2 | 2 | 4 | 2 | 2 | 4 |
| 5 | 3 | 1 | 1 | 1 | 5 | 2 | 2 | 5 |
| 4 | 3 | 3 | 2 | 2 | 4 | 3 | 4 | 4 |
| 5 | 4 | 3 | 2 | 1 | 5 | 2 | 4 | 4 |
| 4 | 4 | 4 | 4 | 2 | 4 | 3 | 4 | 4 |
| 4 | 4 | 2 | 2 | 2 | 4 | 3 | 3 | 4 |
| 4 | 3 | 1 | 3 | 2 | 4 | 2 | 2 | 4 |
| 4 | 2 | 4 | 2 | 2 | 4 | 4 | 4 | 4 |
| 3 | 3 | 1 | 1 | 1 | 4 | 2 | 2 | 2 |
| 3 | 4 | 2 | 2 | 1 | 3 | 2 | 2 | 3 |
| 4 | 5 | 3 | 3 | 3 | 3 | 3 | 4 | 4 |
| 4 | 2 | 2 | 2 | 2 | 5 | 2 | 2 | 4 |
| 5 | 2 | 1 | 1 | 1 | 5 | 3 | 3 | 5 |
| 3 | 4 | 3 | 3 | 1 | 4 | 3 | 3 | 3 |
| 3 | 4 | 4 | 4 | 2 | 4 | 4 | 4 | 5 |
| 2 | 3 | 2 | 3 | 2 | 3 | 3 | 2 | 3 |
| 3 | 3 | 3 | 3 | 1 | 4 | 3 | 2 | 4 |
| 4 | 4 | 4 | 3 | 1 | 5 | 2 | 3 | 4 |
| 4 | 3 | 3 | 2 | 2 | 4 | 4 | 4 | 4 |
| 4 | 4 | 2 | 2 | 2 | 5 | 2 | 2 | 5 |
| 4 | 1 | 1 | 1 | 1 | 4 | 4 | 4 | 4 |
| 5 | 2 | 1 | 2 | 1 | 5 | 4 | 4 | 4 |
| 4 | 4 | 4 | 2 | 2 | 4 | 4 | 4 | 4 |
| 5 | 1 | 1 | 2 | 2 | 5 | 4 | 3 | 5 |
| 4 | 2 | 2 | 4 | 4 | 4 | 4 | 4 | 4 |
| 4 | 3 | 4 | 4 | 4 | 4 | 4 | 5 | 4 |
| 4 | 4 | 4 | 4 | 1 | 4 | 4 | 4 | 4 |

|   |   |   |   |   |   |   |   |   |
|---|---|---|---|---|---|---|---|---|
| 4 | 2 | 2 | 2 | 2 | 4 | 4 | 2 | 4 |
| 5 | 4 | 4 | 1 | 1 | 4 | 4 | 4 | 4 |
| 3 | 4 | 3 | 4 | 3 | 4 | 4 | 2 | 4 |
| 3 | 3 | 1 | 3 | 3 | 3 | 3 | 1 | 3 |
| 3 | 4 | 4 | 2 | 2 | 4 | 2 | 2 | 3 |
| 5 | 2 | 4 | 2 | 2 | 5 | 5 | 5 | 5 |
| 4 | 2 | 2 | 2 | 2 | 4 | 3 | 4 | 4 |
| 2 | 4 | 1 | 1 | 1 | 2 | 4 | 1 | 1 |
| 4 | 2 | 3 | 2 | 2 | 4 | 4 | 2 | 4 |
| 4 | 5 | 4 | 4 | 4 | 4 | 1 | 1 | 4 |
| 4 | 4 | 3 | 2 | 3 | 4 | 3 | 4 | 4 |
| 3 | 5 | 2 | 1 | 2 | 3 | 3 | 4 | 3 |
| 4 | 4 | 3 | 4 | 2 | 4 | 3 | 3 | 4 |
| 4 | 4 | 2 | 1 | 1 | 4 | 2 | 2 | 3 |
| 5 | 3 | 1 | 1 | 1 | 3 | 3 | 1 | 4 |
| 3 | 3 | 2 | 2 | 1 | 4 | 3 | 1 | 3 |
| 4 | 4 | 1 | 1 | 1 | 4 | 2 | 4 | 4 |
| 2 | 4 | 1 | 2 | 3 | 3 | 3 | 4 | 3 |
| 5 | 1 | 5 | 1 | 1 | 5 | 5 | 5 | 5 |
| 5 | 1 | 3 | 1 | 1 | 5 | 5 | 3 | 5 |
| 5 | 4 | 3 | 2 | 2 | 4 | 4 | 4 | 4 |
| 5 | 2 | 2 | 1 | 1 | 3 | 5 | 5 | 5 |
| 5 | 4 | 4 | 4 | 2 | 5 | 4 | 4 | 4 |
| 5 | 1 | 1 | 1 | 1 | 5 | 5 | 4 | 5 |
| 1 | 5 | 2 | 4 | 1 | 3 | 1 | 1 | 1 |
| 3 | 4 | 2 | 2 | 2 | 4 | 3 | 3 | 3 |
| 5 | 1 | 2 | 1 | 1 | 5 | 4 | 4 | 4 |
| 3 | 5 | 1 | 1 | 1 | 5 | 3 | 5 | 3 |
| 4 | 4 | 4 | 4 | 2 | 4 | 3 | 3 | 4 |
| 2 | 3 | 2 | 2 | 1 | 5 | 3 | 4 | 4 |
| 5 | 1 | 1 | 1 | 1 | 4 | 4 | 4 | 4 |
| 3 | 3 | 3 | 3 | 3 | 3 | 3 | 3 | 3 |
| 5 | 2 | 2 | 2 | 1 | 5 | 4 | 5 | 4 |
| 1 | 1 | 1 | 5 | 3 | 1 | 1 | 1 | 1 |
| 3 | 3 | 2 | 2 | 1 | 4 | 2 | 2 | 3 |
| 4 | 5 | 1 | 1 | 1 | 5 | 2 | 2 | 4 |
| 3 | 3 | 2 | 2 | 1 | 5 | 2 | 2 | 2 |
| 4 | 4 | 2 | 3 | 2 | 4 | 3 | 2 | 4 |
| 5 | 5 | 1 | 1 | 1 | 5 | 5 | 5 | 5 |
| 3 | 5 | 2 | 2 | 1 | 3 | 2 | 2 | 2 |
| 5 | 2 | 1 | 1 | 1 | 5 | 3 | 2 | 5 |
| 4 | 3 | 3 | 3 | 2 | 4 | 3 | 4 | 4 |
| 2 | 4 | 2 | 4 | 3 | 4 | 2 | 2 | 2 |
| 2 | 4 | 4 | 4 | 1 | 5 | 2 | 5 | 2 |
| 4 | 4 | 4 | 4 | 4 | 4 | 4 | 4 | 4 |
| 4 | 2 | 1 | 2 | 1 | 4 | 4 | 3 | 4 |
| 4 | 2 | 1 | 1 | 1 | 4 | 4 | 4 | 4 |
| 2 | 4 | 3 | 4 | 3 | 3 | 1 | 1 | 3 |
| 4 | 1 | 1 | 1 | 1 | 5 | 5 | 4 | 5 |
| 4 | 3 | 2 | 2 | 2 | 4 | 4 | 4 | 4 |
| 5 | 5 | 1 | 3 | 1 | 5 | 3 | 1 | 5 |
| 3 | 5 | 2 | 5 | 2 | 4 | 3 | 3 | 3 |
| 4 | 4 | 2 | 3 | 3 | 4 | 2 | 2 | 2 |
| 4 | 2 | 2 | 3 | 2 | 4 | 3 | 3 | 4 |

|   |   |   |   |   |   |   |   |   |
|---|---|---|---|---|---|---|---|---|
| 4 | 4 | 2 | 3 | 1 | 4 | 1 | 1 | 4 |
| 3 | 3 | 3 | 2 | 3 | 4 | 2 | 2 | 3 |
| 4 | 3 | 1 | 2 | 2 | 5 | 2 | 4 | 4 |
| 4 | 4 | 2 | 2 | 2 | 4 | 3 | 3 | 4 |
| 1 | 1 | 5 | 5 | 3 | 2 | 1 | 5 | 2 |
| 5 | 4 | 1 | 3 | 1 | 5 | 2 | 2 | 5 |
| 4 | 2 | 2 | 2 | 1 | 5 | 4 | 4 | 4 |
| 3 | 4 | 2 | 3 | 2 | 3 | 2 | 2 | 3 |
| 4 | 1 | 4 | 4 | 1 | 5 | 5 | 5 | 5 |
| 5 | 3 | 3 | 2 | 1 | 5 | 5 | 5 | 5 |
| 5 | 3 | 3 | 4 | 2 | 4 | 4 | 4 | 4 |
| 5 | 5 | 1 | 1 | 1 | 5 | 5 | 5 | 5 |
| 4 | 3 | 1 | 1 | 1 | 5 | 4 | 4 | 5 |
| 3 | 3 | 2 | 3 | 2 | 4 | 3 | 2 | 3 |
| 4 | 2 | 2 | 2 | 2 | 4 | 4 | 2 | 4 |
| 5 | 1 | 1 | 1 | 1 | 5 | 5 | 5 | 5 |
| 4 | 3 | 3 | 2 | 2 | 4 | 4 | 4 | 4 |
| 4 | 2 | 2 | 3 | 3 | 4 | 3 | 4 | 4 |
| 5 | 4 | 2 | 2 | 1 | 5 | 3 | 4 | 5 |
| 3 | 4 | 1 | 2 | 2 | 3 | 2 | 2 | 2 |
| 4 | 4 | 2 | 3 | 2 | 4 | 2 | 2 | 3 |
| 4 | 4 | 2 | 2 | 2 | 4 | 4 | 4 | 4 |
| 4 | 3 | 2 | 2 | 2 | 4 | 2 | 3 | 3 |
| 4 | 4 | 4 | 2 | 2 | 4 | 2 | 2 | 3 |
| 4 | 4 | 2 | 2 | 1 | 4 | 2 | 3 | 4 |
| 5 | 5 | 1 | 1 | 1 | 5 | 1 | 1 | 5 |
| 5 | 3 | 1 | 1 | 1 | 4 | 5 | 5 | 5 |
| 3 | 3 | 4 | 3 | 2 | 4 | 2 | 2 | 3 |
| 5 | 5 | 5 | 5 | 5 | 5 | 5 | 5 | 5 |
| 4 | 4 | 2 | 4 | 2 | 4 | 2 | 2 | 4 |
| 3 | 3 | 3 | 3 | 3 | 4 | 3 | 3 | 3 |
| 5 | 2 | 2 | 1 | 1 | 5 | 5 | 5 | 5 |
| 3 | 5 | 3 | 3 | 2 | 4 | 2 | 2 | 2 |
| 4 | 3 | 2 | 2 | 2 | 4 | 2 | 4 | 4 |
| 5 | 1 | 1 | 1 | 1 | 5 | 5 | 5 | 5 |
| 3 | 3 | 3 | 2 | 1 | 5 | 3 | 3 | 4 |
| 4 | 3 | 2 | 1 | 1 | 4 | 5 | 2 | 5 |
| 4 | 3 | 3 | 3 | 3 | 4 | 4 | 4 | 4 |
| 3 | 4 | 4 | 4 | 4 | 4 | 2 | 2 | 4 |
| 4 | 4 | 2 | 2 | 1 | 4 | 4 | 4 | 4 |
| 3 | 4 | 2 | 3 | 3 | 3 | 2 | 2 | 3 |
| 5 | 4 | 4 | 3 | 1 | 5 | 2 | 4 | 4 |
| 3 | 4 | 3 | 2 | 2 | 4 | 2 | 2 | 2 |
| 4 | 2 | 2 | 3 | 1 | 1 | 3 | 2 | 4 |
| 5 | 1 | 1 | 1 | 1 | 5 | 5 | 4 | 5 |
| 5 | 2 | 2 | 2 | 2 | 5 | 5 | 4 | 4 |
| 3 | 1 | 5 | 1 | 3 | 3 | 2 | 3 | 3 |
| 4 | 2 | 2 | 2 | 2 | 4 | 4 | 4 | 4 |
| 3 | 3 | 3 | 4 | 2 | 4 | 2 | 2 | 3 |
| 3 | 3 | 3 | 2 | 2 | 3 | 3 | 3 | 3 |
| 4 | 2 | 2 | 2 | 2 | 4 | 4 | 4 | 4 |
| 3 | 3 | 3 | 3 | 3 | 3 | 3 | 3 | 3 |
| 4 | 4 | 3 | 4 | 3 | 4 | 3 | 3 | 4 |
| 4 | 3 | 2 | 3 | 2 | 4 | 4 | 3 | 4 |

|   |   |   |   |   |   |   |   |   |
|---|---|---|---|---|---|---|---|---|
| 4 | 2 | 2 | 2 | 2 | 4 | 4 | 4 | 4 |
| 4 | 5 | 5 | 5 | 5 | 5 | 5 | 5 | 5 |
| 4 | 3 | 4 | 4 | 2 | 4 | 4 | 3 | 2 |
| 2 | 4 | 2 | 4 | 2 | 2 | 4 | 4 | 2 |
| 4 | 3 | 2 | 2 | 2 | 4 | 3 | 3 | 4 |
| 4 | 2 | 2 | 2 | 2 | 3 | 5 | 3 | 5 |
| 1 | 4 | 4 | 4 | 1 | 4 | 1 | 1 | 1 |
| 2 | 2 | 2 | 3 | 2 | 4 | 2 | 2 | 2 |
| 3 | 3 | 2 | 4 | 3 | 4 | 1 | 1 | 3 |
| 3 | 4 | 4 | 3 | 1 | 4 | 1 | 1 | 2 |
| 4 | 5 | 3 | 2 | 1 | 5 | 3 | 4 | 4 |
| 4 | 2 | 2 | 2 | 1 | 4 | 3 | 4 | 4 |
| 3 | 4 | 3 | 3 | 3 | 3 | 1 | 1 | 3 |
| 4 | 1 | 1 | 3 | 1 | 5 | 2 | 3 | 4 |
| 5 | 2 | 1 | 1 | 1 | 5 | 4 | 5 | 4 |
| 5 | 1 | 1 | 2 | 1 | 5 | 4 | 4 | 5 |
| 3 | 4 | 2 | 3 | 1 | 4 | 2 | 2 | 3 |
| 4 | 3 | 2 | 2 | 1 | 1 | 2 | 3 | 3 |
| 5 | 1 | 1 | 1 | 1 | 3 | 4 | 3 | 4 |
| 4 | 4 | 1 | 2 | 1 | 5 | 2 | 2 | 5 |
| 3 | 3 | 4 | 2 | 2 | 4 | 2 | 2 | 3 |
| 4 | 4 | 4 | 4 | 4 | 4 | 4 | 4 | 4 |
| 3 | 2 | 1 | 3 | 3 | 3 | 3 | 3 | 3 |
| 4 | 2 | 2 | 3 | 2 | 4 | 3 | 3 | 3 |
| 5 | 2 | 4 | 2 | 1 | 5 | 5 | 5 | 5 |
| 4 | 3 | 1 | 4 | 1 | 3 | 1 | 1 | 5 |
| 5 | 5 | 2 | 3 | 2 | 4 | 3 | 3 | 4 |
| 4 | 2 | 2 | 2 | 2 | 4 | 4 | 3 | 4 |
| 3 | 3 | 2 | 1 | 1 | 4 | 3 | 3 | 3 |
| 3 | 2 | 2 | 2 | 1 | 4 | 3 | 4 | 3 |
| 5 | 4 | 2 | 2 | 3 | 5 | 2 | 5 | 5 |
| 5 | 2 | 2 | 2 | 1 | 5 | 3 | 4 | 5 |
| 3 | 3 | 3 | 2 | 2 | 3 | 3 | 3 | 3 |
| 4 | 4 | 4 | 4 | 4 | 4 | 4 | 4 | 4 |
| 2 | 2 | 2 | 2 | 2 | 4 | 4 | 4 | 4 |
| 1 | 5 | 3 | 3 | 3 | 3 | 3 | 3 | 3 |
| 5 | 1 | 1 | 1 | 1 | 5 | 5 | 5 | 5 |
| 5 | 2 | 1 | 1 | 1 | 5 | 5 | 5 | 5 |
| 4 | 4 | 4 | 4 | 4 | 4 | 4 | 4 | 4 |
| 5 | 1 | 5 | 1 | 1 | 5 | 4 | 4 | 5 |
| 5 | 5 | 4 | 4 | 4 | 4 | 4 | 4 | 4 |
| 4 | 4 | 2 | 5 | 3 | 4 | 3 | 3 | 4 |
| 3 | 3 | 2 | 3 | 2 | 4 | 4 | 2 | 4 |
| 4 | 3 | 2 | 2 | 2 | 4 | 4 | 4 | 4 |
| 4 | 4 | 4 | 4 | 4 | 4 | 4 | 4 | 4 |
| 3 | 4 | 2 | 3 | 2 | 4 | 2 | 2 | 3 |
| 4 | 3 | 3 | 2 | 2 | 4 | 4 | 4 | 4 |
| 4 | 3 | 2 | 3 | 2 | 4 | 4 | 4 | 4 |
| 4 | 2 | 4 | 2 | 2 | 2 | 4 | 4 | 4 |
| 4 | 2 | 4 | 3 | 2 | 4 | 4 | 4 | 4 |
| 4 | 2 | 2 | 2 | 2 | 4 | 4 | 4 | 3 |
| 3 | 4 | 4 | 2 | 2 | 4 | 3 | 4 | 3 |
| 5 | 2 | 2 | 1 | 1 | 5 | 5 | 5 | 5 |
| 4 | 2 | 2 | 2 | 2 | 2 | 5 | 2 | 4 |

|   |   |   |   |   |   |   |   |   |
|---|---|---|---|---|---|---|---|---|
| 5 | 5 | 5 | 5 | 1 | 1 | 5 | 5 | 5 |
| 5 | 3 | 5 | 2 | 2 | 5 | 5 | 5 | 5 |
| 5 | 2 | 1 | 1 | 1 | 4 | 4 | 4 | 4 |
| 4 | 3 | 4 | 4 | 2 | 5 | 3 | 3 | 4 |
| 4 | 5 | 1 | 2 | 1 | 3 | 1 | 4 | 2 |
| 5 | 1 | 2 | 1 | 1 | 3 | 4 | 4 | 5 |
| 5 | 4 | 2 | 2 | 1 | 5 | 2 | 4 | 4 |
| 5 | 2 | 2 | 2 | 2 | 5 | 4 | 4 | 5 |
| 4 | 2 | 2 | 3 | 4 | 5 | 3 | 1 | 1 |
| 4 | 2 | 1 | 1 | 1 | 3 | 4 | 4 | 4 |
| 5 | 2 | 1 | 1 | 1 | 5 | 5 | 3 | 4 |
| 2 | 2 | 2 | 1 | 1 | 1 | 1 | 1 | 2 |
| 4 | 3 | 2 | 2 | 2 | 4 | 3 | 4 | 4 |
| 4 | 3 | 2 | 2 | 2 | 3 | 4 | 4 | 4 |
| 4 | 4 | 4 | 4 | 4 | 4 | 4 | 4 | 4 |
| 3 | 4 | 2 | 3 | 2 | 4 | 2 | 2 | 2 |
| 3 | 4 | 2 | 2 | 2 | 4 | 2 | 2 | 4 |
| 4 | 2 | 1 | 1 | 1 | 4 | 3 | 2 | 4 |
| 4 | 4 | 1 | 1 | 1 | 4 | 3 | 4 | 4 |
| 5 | 3 | 1 | 1 | 1 | 5 | 3 | 5 | 5 |
| 5 | 1 | 1 | 1 | 1 | 5 | 5 | 5 | 5 |
| 1 | 3 | 3 | 1 | 1 | 4 | 1 | 1 | 3 |
| 4 | 4 | 4 | 2 | 4 | 3 | 3 | 3 | 3 |
| 5 | 4 | 3 | 2 | 1 | 4 | 3 | 4 | 5 |
| 1 | 1 | 1 | 5 | 5 | 5 | 5 | 5 | 5 |
| 3 | 3 | 3 | 3 | 3 | 3 | 3 | 3 | 3 |
| 3 | 3 | 2 | 2 | 2 | 3 | 3 | 3 | 3 |
| 3 | 3 | 1 | 2 | 1 | 4 | 3 | 3 | 4 |
| 4 | 2 | 4 | 2 | 2 | 5 | 4 | 4 | 4 |
| 1 | 4 | 4 | 5 | 5 | 1 | 1 | 1 | 1 |
| 4 | 2 | 2 | 2 | 1 | 4 | 4 | 3 | 4 |
| 4 | 3 | 2 | 3 | 1 | 5 | 2 | 3 | 5 |
| 5 | 1 | 5 | 1 | 1 | 5 | 5 | 5 | 5 |
| 3 | 1 | 1 | 2 | 2 | 5 | 4 | 4 | 3 |
| 5 | 2 | 2 | 1 | 2 | 4 | 5 | 5 | 4 |
| 5 | 1 | 5 | 1 | 1 | 5 | 5 | 5 | 5 |
| 5 | 3 | 1 | 1 | 1 | 5 | 5 | 4 | 5 |
| 4 | 2 | 2 | 2 | 2 | 4 | 4 | 4 | 4 |
| 5 | 1 | 1 | 1 | 1 | 5 | 1 | 3 | 5 |
| 4 | 3 | 2 | 2 | 2 | 4 | 4 | 4 | 4 |
| 5 | 5 | 5 | 5 | 5 | 5 | 5 | 5 | 5 |
| 5 | 1 | 5 | 1 | 1 | 5 | 5 | 5 | 5 |
| 4 | 2 | 3 | 1 | 1 | 4 | 4 | 3 | 4 |
| 4 | 2 | 2 | 2 | 2 | 4 | 4 | 4 | 4 |
| 4 | 2 | 2 | 1 | 1 | 5 | 4 | 4 | 4 |
| 3 | 4 | 2 | 1 | 1 | 4 | 4 | 4 | 4 |
| 5 | 5 | 1 | 1 | 1 | 5 | 1 | 1 | 5 |
| 3 | 3 | 3 | 1 | 1 | 3 | 3 | 3 | 3 |
| 4 | 4 | 2 | 2 | 2 | 4 | 4 | 4 | 4 |
| 4 | 2 | 1 | 3 | 3 | 4 | 4 | 3 | 5 |
| 3 | 4 | 3 | 3 | 3 | 3 | 3 | 3 | 3 |
| 4 | 2 | 2 | 2 | 2 | 4 | 3 | 2 | 4 |
| 4 | 2 | 4 | 2 | 2 | 4 | 4 | 4 | 4 |
| 5 | 2 | 2 | 1 | 1 | 5 | 5 | 5 | 5 |

|   |   |   |   |   |   |   |   |   |
|---|---|---|---|---|---|---|---|---|
| 5 | 1 | 2 | 2 | 1 | 5 | 5 | 5 | 5 |
| 5 | 1 | 3 | 3 | 2 | 2 | 5 | 5 | 5 |
| 3 | 3 | 2 | 2 | 2 | 4 | 2 | 3 | 4 |
| 4 | 2 | 2 | 2 | 2 | 4 | 4 | 4 | 4 |
| 2 | 5 | 3 | 2 | 2 | 3 | 2 | 2 | 2 |
| 4 | 2 | 4 | 1 | 2 | 5 | 3 | 4 | 5 |
| 4 | 3 | 1 | 2 | 1 | 4 | 2 | 3 | 4 |
| 5 | 2 | 3 | 1 | 1 | 5 | 5 | 5 | 5 |
| 5 | 5 | 5 | 5 | 5 | 5 | 5 | 5 | 5 |
| 4 | 1 | 1 | 1 | 1 | 1 | 5 | 4 | 5 |
| 4 | 4 | 2 | 2 | 2 | 4 | 4 | 4 | 4 |
| 3 | 3 | 4 | 4 | 2 | 3 | 2 | 5 | 3 |
| 5 | 1 | 1 | 1 | 1 | 5 | 5 | 5 | 5 |
| 3 | 3 | 3 | 3 | 3 | 3 | 3 | 3 | 3 |
| 3 | 2 | 2 | 2 | 2 | 3 | 3 | 4 | 4 |
| 4 | 2 | 4 | 1 | 1 | 5 | 5 | 5 | 4 |
| 3 | 1 | 2 | 1 | 1 | 5 | 3 | 3 | 4 |
| 1 | 1 | 1 | 1 | 1 | 2 | 1 | 1 | 1 |
| 2 | 2 | 2 | 3 | 4 | 3 | 3 | 3 | 2 |
| 4 | 2 | 2 | 2 | 3 | 3 | 4 | 4 | 4 |
| 3 | 2 | 2 | 2 | 1 | 4 | 3 | 2 | 3 |
| 4 | 2 | 1 | 2 | 1 | 4 | 4 | 4 | 4 |
| 5 | 3 | 1 | 1 | 1 | 5 | 5 | 3 | 5 |
| 5 | 1 | 1 | 1 | 1 | 4 | 4 | 5 | 4 |
| 4 | 4 | 3 | 1 | 2 | 3 | 3 | 3 | 3 |
| 5 | 1 | 3 | 1 | 1 | 3 | 5 | 5 | 5 |
| 5 | 1 | 1 | 1 | 1 | 5 | 4 | 3 | 5 |
| 4 | 2 | 2 | 3 | 2 | 3 | 2 | 2 | 4 |
| 5 | 3 | 1 | 2 | 1 | 4 | 3 | 3 | 5 |
| 4 | 2 | 2 | 4 | 2 | 3 | 4 | 3 | 4 |
| 3 | 3 | 3 | 3 | 3 | 3 | 3 | 3 | 3 |
| 5 | 1 | 1 | 1 | 1 | 4 | 4 | 5 | 4 |
| 4 | 1 | 2 | 1 | 1 | 4 | 4 | 4 | 4 |
| 5 | 2 | 1 | 1 | 1 | 3 | 4 | 4 | 5 |
| 4 | 4 | 4 | 1 | 1 | 4 | 1 | 2 | 4 |
| 4 | 3 | 3 | 3 | 3 | 4 | 3 | 2 | 3 |
| 3 | 1 | 2 | 3 | 1 | 3 | 3 | 3 | 4 |
| 5 | 2 | 4 | 1 | 1 | 1 | 5 | 5 | 5 |
| 3 | 3 | 1 | 1 | 1 | 2 | 4 | 2 | 4 |
| 4 | 3 | 2 | 1 | 1 | 4 | 4 | 4 | 4 |
| 4 | 2 | 2 | 2 | 2 | 3 | 4 | 3 | 4 |
| 5 | 1 | 1 | 1 | 1 | 1 | 5 | 5 | 5 |
| 5 | 5 | 4 | 1 | 1 | 5 | 3 | 3 | 5 |
| 5 | 1 | 1 | 1 | 1 | 5 | 5 | 5 | 5 |
| 3 | 3 | 3 | 3 | 3 | 3 | 3 | 3 | 3 |
| 5 | 1 | 2 | 2 | 2 | 2 | 5 | 5 | 5 |
| 5 | 2 | 1 | 1 | 1 | 5 | 4 | 3 | 5 |
| 5 | 2 | 1 | 3 | 1 | 5 | 4 | 1 | 4 |
| 4 | 4 | 3 | 2 | 3 | 4 | 2 | 2 | 4 |
| 5 | 1 | 1 | 1 | 1 | 5 | 4 | 4 | 5 |
| 3 | 3 | 3 | 3 | 3 | 3 | 3 | 3 | 3 |
| 5 | 2 | 3 | 1 | 1 | 2 | 5 | 4 | 5 |
| 5 | 1 | 1 | 1 | 1 | 5 | 5 | 5 | 5 |
| 3 | 4 | 2 | 3 | 2 | 3 | 2 | 2 | 4 |

|   |   |   |   |   |   |   |   |   |
|---|---|---|---|---|---|---|---|---|
| 3 | 3 | 3 | 3 | 3 | 3 | 3 | 3 | 3 |
| 5 | 3 | 3 | 1 | 1 | 3 | 4 | 4 | 5 |
| 4 | 1 | 1 | 2 | 2 | 4 | 5 | 4 | 4 |
| 3 | 3 | 3 | 3 | 3 | 3 | 3 | 3 | 3 |
| 4 | 1 | 3 | 4 | 4 | 2 | 2 | 4 | 3 |
| 5 | 1 | 1 | 1 | 1 | 5 | 4 | 4 | 5 |
| 2 | 5 | 3 | 5 | 1 | 5 | 5 | 5 | 5 |
| 4 | 2 | 3 | 2 | 2 | 2 | 2 | 2 | 4 |
| 5 | 1 | 1 | 2 | 2 | 2 | 5 | 5 | 4 |
| 5 | 1 | 5 | 1 | 1 | 5 | 5 | 5 | 5 |
| 5 | 1 | 5 | 1 | 1 | 5 | 5 | 5 | 5 |
| 3 | 4 | 2 | 3 | 2 | 4 | 4 | 2 | 4 |
| 5 | 1 | 1 | 1 | 1 | 4 | 5 | 5 | 5 |
| 1 | 1 | 1 | 5 | 5 | 1 | 1 | 1 | 1 |
| 5 | 3 | 2 | 2 | 1 | 4 | 3 | 2 | 4 |
| 5 | 4 | 1 | 2 | 5 | 5 | 2 | 5 | 4 |
| 4 | 2 | 2 | 2 | 1 | 5 | 3 | 3 | 4 |
| 5 | 1 | 1 | 1 | 1 | 4 | 5 | 4 | 5 |
| 4 | 2 | 3 | 2 | 2 | 3 | 4 | 3 | 4 |
| 3 | 3 | 2 | 2 | 2 | 3 | 3 | 4 | 3 |
| 4 | 2 | 1 | 3 | 1 | 1 | 3 | 2 | 4 |
| 3 | 3 | 3 | 3 | 3 | 3 | 3 | 3 | 3 |
| 5 | 1 | 2 | 1 | 1 | 1 | 5 | 5 | 5 |
| 5 | 1 | 5 | 1 | 1 | 5 | 5 | 5 | 5 |
| 2 | 2 | 2 | 2 | 2 | 2 | 2 | 2 | 2 |
| 4 | 4 | 3 | 3 | 2 | 4 | 4 | 2 | 4 |
| 4 | 1 | 3 | 2 | 3 | 4 | 5 | 5 | 2 |
| 4 | 2 | 2 | 3 | 2 | 4 | 2 | 2 | 4 |
| 4 | 3 | 3 | 3 | 2 | 3 | 4 | 4 | 4 |
| 4 | 3 | 2 | 2 | 2 | 4 | 3 | 3 | 4 |
| 2 | 2 | 2 | 2 | 2 | 4 | 2 | 4 | 4 |
| 3 | 2 | 4 | 2 | 2 | 4 | 4 | 3 | 3 |
| 4 | 4 | 3 | 2 | 1 | 4 | 3 | 4 | 4 |
| 3 | 4 | 3 | 3 | 2 | 4 | 2 | 2 | 4 |
| 3 | 4 | 3 | 2 | 2 | 3 | 3 | 3 | 3 |
| 4 | 2 | 2 | 2 | 2 | 4 | 4 | 2 | 4 |
| 3 | 4 | 3 | 2 | 2 | 4 | 3 | 2 | 3 |
| 4 | 4 | 2 | 2 | 2 | 4 | 4 | 4 | 4 |
| 4 | 3 | 3 | 2 | 2 | 2 | 4 | 4 | 4 |
| 4 | 3 | 4 | 2 | 1 | 4 | 3 | 3 | 4 |
| 2 | 4 | 2 | 5 | 2 | 5 | 2 | 1 | 3 |
| 5 | 2 | 2 | 2 | 2 | 5 | 5 | 3 | 5 |
| 4 | 2 | 3 | 1 | 1 | 5 | 4 | 4 | 4 |
| 3 | 3 | 2 | 4 | 2 | 4 | 2 | 3 | 3 |
| 3 | 4 | 3 | 3 | 3 | 3 | 2 | 2 | 3 |
| 5 | 1 | 5 | 1 | 1 | 5 | 5 | 5 | 5 |
| 3 | 3 | 4 | 4 | 3 | 3 | 2 | 3 | 3 |
| 4 | 2 | 2 | 2 | 2 | 4 | 4 | 4 | 4 |
| 4 | 2 | 2 | 3 | 2 | 4 | 4 | 3 | 4 |
| 4 | 4 | 3 | 2 | 1 | 4 | 2 | 3 | 4 |
| 4 | 2 | 2 | 2 | 2 | 2 | 4 | 4 | 4 |
| 4 | 2 | 2 | 4 | 2 | 4 | 3 | 2 | 4 |
| 3 | 3 | 3 | 3 | 3 | 3 | 3 | 3 | 3 |
| 4 | 4 | 3 | 2 | 1 | 5 | 3 | 4 | 4 |

|   |   |   |   |   |   |   |   |   |
|---|---|---|---|---|---|---|---|---|
| 5 | 3 | 2 | 1 | 1 | 4 | 3 | 2 | 4 |
| 5 | 4 | 2 | 3 | 1 | 5 | 3 | 3 | 4 |
| 3 | 4 | 1 | 3 | 1 | 3 | 2 | 4 | 3 |
| 4 | 4 | 2 | 2 | 2 | 3 | 4 | 4 | 4 |
| 2 | 4 | 4 | 4 | 2 | 4 | 2 | 2 | 3 |
| 5 | 3 | 1 | 1 | 1 | 5 | 5 | 1 | 5 |
| 2 | 3 | 1 | 2 | 2 | 3 | 2 | 2 | 4 |
| 3 | 2 | 2 | 2 | 2 | 4 | 3 | 2 | 3 |
| 5 | 2 | 1 | 1 | 1 | 5 | 4 | 4 | 5 |
| 5 | 3 | 3 | 3 | 3 | 5 | 5 | 5 | 5 |
| 4 | 2 | 2 | 2 | 2 | 4 | 4 | 4 | 4 |
| 1 | 1 | 1 | 1 | 1 | 1 | 1 | 1 | 1 |
| 4 | 2 | 2 | 2 | 2 | 5 | 4 | 4 | 4 |
| 3 | 4 | 3 | 3 | 2 | 3 | 2 | 2 | 3 |
| 5 | 3 | 1 | 1 | 1 | 1 | 4 | 5 | 5 |
| 3 | 3 | 3 | 3 | 3 | 3 | 3 | 3 | 4 |
| 4 | 4 | 2 | 1 | 1 | 4 | 3 | 4 | 4 |
| 2 | 3 | 2 | 2 | 2 | 3 | 1 | 2 | 1 |
| 4 | 2 | 3 | 4 | 2 | 4 | 3 | 2 | 4 |
| 3 | 4 | 1 | 4 | 2 | 4 | 2 | 1 | 2 |
| 5 | 5 | 5 | 5 | 5 | 4 | 3 | 3 | 3 |
| 3 | 3 | 3 | 3 | 3 | 3 | 3 | 3 | 3 |
| 3 | 3 | 2 | 2 | 2 | 3 | 3 | 3 | 4 |
| 1 | 1 | 1 | 2 | 2 | 4 | 3 | 3 | 4 |
| 4 | 3 | 4 | 3 | 2 | 4 | 4 | 4 | 4 |
| 4 | 4 | 1 | 3 | 1 | 4 | 3 | 3 | 5 |
| 3 | 4 | 2 | 3 | 2 | 4 | 2 | 4 | 4 |
| 4 | 4 | 1 | 1 | 1 | 4 | 1 | 1 | 4 |
| 4 | 4 | 2 | 2 | 2 | 4 | 3 | 2 | 2 |
| 5 | 4 | 2 | 2 | 2 | 4 | 2 | 2 | 4 |
| 5 | 3 | 1 | 1 | 3 | 5 | 4 | 2 | 5 |
| 4 | 3 | 3 | 2 | 2 | 4 | 3 | 4 | 4 |
| 4 | 3 | 2 | 2 | 2 | 4 | 4 | 2 | 4 |
| 5 | 1 | 5 | 1 | 1 | 5 | 5 | 5 | 5 |
| 4 | 4 | 2 | 4 | 2 | 4 | 2 | 4 | 4 |
| 4 | 2 | 2 | 2 | 2 | 4 | 3 | 2 | 4 |
| 4 | 4 | 2 | 3 | 2 | 4 | 3 | 4 | 4 |
| 3 | 4 | 2 | 4 | 2 | 4 | 3 | 4 | 4 |
| 4 | 2 | 2 | 2 | 2 | 4 | 2 | 2 | 4 |
| 3 | 4 | 4 | 4 | 3 | 4 | 2 | 2 | 4 |
| 5 | 2 | 2 | 3 | 1 | 5 | 5 | 3 | 5 |
| 4 | 2 | 2 | 2 | 2 | 3 | 4 | 3 | 4 |
| 5 | 5 | 2 | 2 | 2 | 4 | 4 | 4 | 4 |
| 3 | 3 | 2 | 2 | 1 | 4 | 3 | 3 | 3 |
| 4 | 2 | 3 | 2 | 2 | 4 | 4 | 4 | 4 |
| 4 | 3 | 2 | 2 | 2 | 4 | 2 | 2 | 4 |
| 4 | 3 | 3 | 3 | 2 | 4 | 3 | 3 | 4 |
| 4 | 3 | 2 | 3 | 2 | 4 | 2 | 2 | 3 |
| 4 | 4 | 3 | 3 | 2 | 4 | 4 | 1 | 4 |
| 4 | 4 | 2 | 2 | 2 | 2 | 2 | 2 | 2 |
| 4 | 2 | 2 | 2 | 2 | 3 | 3 | 3 | 4 |
| 5 | 1 | 2 | 1 | 1 | 5 | 5 | 4 | 5 |
| 5 | 1 | 2 | 2 | 1 | 4 | 4 | 3 | 5 |
| 5 | 2 | 1 | 1 | 1 | 5 | 4 | 4 | 4 |



|   |   |   |   |   |   |   |   |   |
|---|---|---|---|---|---|---|---|---|
| 3 | 3 | 2 | 2 | 2 | 3 | 3 | 3 | 3 |
| 4 | 2 | 3 | 3 | 2 | 4 | 4 | 4 | 4 |
| 4 | 3 | 2 | 2 | 1 | 4 | 3 | 3 | 4 |
| 4 | 3 | 3 | 2 | 2 | 4 | 4 | 4 | 4 |
| 4 | 4 | 2 | 2 | 2 | 4 | 3 | 2 | 4 |
| 4 | 2 | 2 | 2 | 1 | 4 | 4 | 3 | 4 |
| 2 | 1 | 1 | 2 | 2 | 4 | 4 | 3 | 5 |
| 4 | 2 | 1 | 2 | 1 | 5 | 4 | 3 | 4 |
| 4 | 3 | 1 | 1 | 1 | 5 | 3 | 4 | 4 |
| 5 | 3 | 1 | 1 | 1 | 5 | 2 | 3 | 5 |
| 5 | 2 | 1 | 1 | 1 | 5 | 4 | 4 | 4 |
| 4 | 3 | 2 | 2 | 3 | 5 | 4 | 4 | 5 |
| 5 | 3 | 1 | 1 | 1 | 4 | 3 | 1 | 4 |
| 4 | 2 | 2 | 5 | 2 | 4 | 3 | 4 | 4 |
| 5 | 3 | 2 | 1 | 1 | 5 | 4 | 3 | 5 |
| 4 | 2 | 2 | 2 | 2 | 4 | 4 | 2 | 4 |
| 5 | 3 | 1 | 1 | 1 | 5 | 5 | 4 | 5 |
| 4 | 2 | 2 | 3 | 2 | 4 | 4 | 3 | 4 |
| 4 | 2 | 2 | 3 | 2 | 4 | 3 | 2 | 3 |
| 3 | 4 | 2 | 3 | 3 | 2 | 1 | 1 | 3 |
| 5 | 2 | 1 | 1 | 1 | 5 | 3 | 4 | 5 |
| 2 | 2 | 1 | 2 | 1 | 2 | 3 | 3 | 2 |
| 5 | 1 | 1 | 5 | 1 | 5 | 5 | 5 | 5 |
| 5 | 1 | 1 | 1 | 1 | 4 | 5 | 4 | 5 |
| 5 | 1 | 5 | 1 | 1 | 5 | 5 | 5 | 5 |
| 2 | 4 | 2 | 4 | 2 | 4 | 1 | 1 | 3 |
| 5 | 2 | 2 | 1 | 1 | 5 | 5 | 4 | 5 |
| 5 | 1 | 3 | 1 | 1 | 5 | 4 | 4 | 5 |
| 4 | 1 | 4 | 2 | 1 | 4 | 3 | 3 | 5 |
| 5 | 5 | 1 | 1 | 1 | 5 | 5 | 5 | 5 |
| 4 | 1 | 1 | 1 | 1 | 4 | 4 | 1 | 4 |
| 5 | 1 | 2 | 1 | 1 | 5 | 5 | 5 | 5 |
| 3 | 3 | 3 | 4 | 2 | 3 | 2 | 2 | 2 |
| 5 | 1 | 1 | 1 | 1 | 1 | 5 | 4 | 5 |
| 5 | 3 | 1 | 1 | 1 | 4 | 3 | 3 | 5 |
| 4 | 2 | 2 | 1 | 1 | 4 | 4 | 3 | 4 |
| 4 | 3 | 4 | 2 | 2 | 4 | 2 | 4 | 4 |
| 2 | 2 | 2 | 4 | 2 | 3 | 2 | 2 | 1 |
| 3 | 3 | 3 | 3 | 3 | 3 | 3 | 3 | 3 |
| 4 | 2 | 5 | 1 | 1 | 5 | 4 | 3 | 5 |
| 5 | 1 | 4 | 1 | 1 | 4 | 4 | 4 | 5 |
| 3 | 2 | 3 | 3 | 2 | 4 | 4 | 4 | 3 |
| 3 | 3 | 3 | 3 | 3 | 3 | 3 | 3 | 3 |
| 3 | 2 | 1 | 2 | 3 | 3 | 3 | 4 | 3 |
| 2 | 2 | 2 | 2 | 3 | 3 | 2 | 4 | 2 |
| 3 | 3 | 4 | 2 | 1 | 3 | 2 | 1 | 3 |
| 4 | 2 | 1 | 2 | 2 | 4 | 3 | 4 | 4 |
| 5 | 5 | 3 | 3 | 2 | 3 | 3 | 3 | 4 |
| 4 | 1 | 2 | 2 | 2 | 4 | 4 | 4 | 4 |
| 5 | 4 | 2 | 2 | 2 | 4 | 3 | 2 | 4 |
| 5 | 1 | 1 | 2 | 1 | 5 | 5 | 1 | 5 |
| 5 | 1 | 3 | 1 | 1 | 4 | 5 | 5 | 5 |
| 4 | 2 | 1 | 2 | 1 | 3 | 4 | 4 | 4 |
| 5 | 2 | 1 | 1 | 1 | 4 | 5 | 3 | 5 |

|   |   |   |   |   |   |   |   |   |
|---|---|---|---|---|---|---|---|---|
| 4 | 3 | 2 | 4 | 1 | 4 | 3 | 2 | 4 |
| 5 | 5 | 4 | 3 | 2 | 5 | 3 | 4 | 5 |
| 3 | 1 | 1 | 4 | 1 | 5 | 3 | 1 | 5 |
| 1 | 5 | 1 | 5 | 5 | 1 | 1 | 1 | 1 |
| 3 | 3 | 2 | 1 | 1 | 4 | 3 | 3 | 3 |
| 3 | 2 | 3 | 4 | 3 | 3 | 2 | 2 | 3 |
| 4 | 4 | 2 | 3 | 2 | 4 | 2 | 2 | 4 |
| 3 | 1 | 1 | 1 | 1 | 4 | 4 | 5 | 4 |
| 5 | 2 | 2 | 1 | 1 | 4 | 4 | 2 | 4 |
| 3 | 4 | 3 | 3 | 1 | 3 | 2 | 4 | 2 |
| 5 | 2 | 2 | 2 | 1 | 4 | 4 | 4 | 4 |
| 3 | 2 | 2 | 4 | 2 | 4 | 3 | 1 | 4 |
| 3 | 3 | 2 | 2 | 2 | 3 | 2 | 3 | 3 |
| 5 | 1 | 1 | 2 | 1 | 4 | 5 | 5 | 5 |
| 5 | 1 | 4 | 2 | 1 | 5 | 5 | 5 | 5 |
| 3 | 4 | 2 | 3 | 3 | 3 | 3 | 3 | 4 |
| 4 | 2 | 2 | 2 | 1 | 4 | 3 | 4 | 4 |
| 5 | 2 | 2 | 2 | 1 | 5 | 4 | 4 | 5 |
| 4 | 4 | 4 | 3 | 3 | 3 | 4 | 2 | 4 |
| 4 | 3 | 3 | 2 | 2 | 4 | 4 | 4 | 4 |
| 4 | 2 | 4 | 2 | 2 | 3 | 3 | 4 | 4 |
| 3 | 2 | 4 | 3 | 2 | 3 | 2 | 3 | 3 |
| 5 | 5 | 5 | 5 | 5 | 5 | 5 | 5 | 5 |
| 5 | 2 | 5 | 1 | 1 | 3 | 5 | 3 | 4 |
| 4 | 5 | 4 | 5 | 2 | 4 | 2 | 4 | 4 |
| 2 | 2 | 2 | 3 | 2 | 3 | 2 | 2 | 3 |
| 3 | 3 | 3 | 3 | 3 | 3 | 3 | 2 | 2 |
| 4 | 1 | 1 | 1 | 1 | 3 | 4 | 5 | 4 |
| 3 | 3 | 3 | 3 | 3 | 3 | 3 | 3 | 3 |
| 4 | 3 | 2 | 2 | 2 | 4 | 4 | 4 | 4 |
| 3 | 3 | 3 | 3 | 3 | 3 | 3 | 3 | 3 |
| 2 | 3 | 2 | 4 | 3 | 4 | 2 | 2 | 3 |
| 4 | 3 | 2 | 4 | 2 | 5 | 3 | 3 | 4 |
| 4 | 4 | 3 | 2 | 1 | 4 | 3 | 3 | 4 |
| 4 | 3 | 4 | 2 | 2 | 4 | 3 | 3 | 4 |
| 4 | 3 | 2 | 2 | 2 | 3 | 4 | 4 | 4 |
| 3 | 2 | 2 | 2 | 2 | 4 | 4 | 4 | 4 |
| 3 | 2 | 2 | 2 | 1 | 3 | 4 | 4 | 4 |
| 4 | 3 | 2 | 3 | 2 | 4 | 3 | 3 | 4 |
| 4 | 3 | 1 | 3 | 3 | 3 | 3 | 3 | 3 |
| 4 | 1 | 1 | 3 | 1 | 4 | 3 | 4 | 4 |
| 4 | 2 | 2 | 1 | 1 | 3 | 3 | 4 | 4 |
| 3 | 4 | 4 | 3 | 2 | 3 | 2 | 2 | 3 |
| 4 | 1 | 1 | 1 | 1 | 2 | 4 | 4 | 4 |
| 2 | 3 | 2 | 2 | 2 | 3 | 2 | 2 | 2 |
| 4 | 4 | 4 | 4 | 2 | 5 | 2 | 2 | 4 |
| 5 | 1 | 1 | 1 | 1 | 5 | 5 | 4 | 5 |
| 4 | 2 | 2 | 1 | 1 | 4 | 3 | 2 | 3 |
| 4 | 2 | 1 | 2 | 2 | 4 | 4 | 4 | 2 |
| 4 | 3 | 1 | 2 | 1 | 4 | 3 | 3 | 4 |
| 4 | 1 | 1 | 2 | 1 | 3 | 4 | 4 | 4 |
| 4 | 3 | 2 | 2 | 2 | 4 | 4 | 4 | 4 |
| 5 | 2 | 1 | 2 | 1 | 5 | 5 | 4 | 5 |
| 5 | 2 | 2 | 1 | 1 | 4 | 2 | 2 | 4 |

|   |   |   |   |   |   |   |   |   |
|---|---|---|---|---|---|---|---|---|
| 4 | 3 | 1 | 4 | 1 | 5 | 3 | 4 | 3 |
| 4 | 2 | 2 | 2 | 2 | 4 | 4 | 4 | 4 |
| 4 | 2 | 3 | 2 | 2 | 4 | 3 | 2 | 4 |
| 5 | 4 | 2 | 2 | 1 | 5 | 5 | 5 | 5 |
| 5 | 1 | 1 | 1 | 1 | 1 | 4 | 2 | 4 |
| 5 | 2 | 2 | 1 | 1 | 4 | 2 | 2 | 4 |

| C15 | C16 | C17 | C18 | C19 | C20 | C21 | C22 | C23 |
|-----|-----|-----|-----|-----|-----|-----|-----|-----|
| 5   | 5   | 5   | 5   | 5   | 5   | 5   | 5   | 5   |
| 5   | 4   | 1   | 1   | 5   | 3   | 2   | 4   | 3   |
| 5   | 5   | 5   | 5   | 5   | 5   | 5   | 5   | 5   |
| 4   | 3   | 4   | 2   | 5   | 5   | 5   | 5   | 5   |
| 3   | 3   | 3   | 3   | 3   | 3   | 3   | 3   | 3   |
| 5   | 5   | 5   | 5   | 5   | 5   | 5   | 5   | 5   |
| 3   | 5   | 5   | 5   | 5   | 3   | 5   | 5   | 5   |
| 4   | 2   | 3   | 2   | 4   | 2   | 4   | 3   | 4   |
| 3   | 3   | 3   | 3   | 3   | 3   | 3   | 3   | 3   |
| 3   | 5   | 5   | 1   | 5   | 5   | 5   | 5   | 5   |
| 3   | 1   | 4   | 1   | 5   | 5   | 4   | 5   | 5   |
| 4   | 2   | 3   | 2   | 4   | 3   | 3   | 3   | 4   |
| 1   | 4   | 4   | 1   | 4   | 5   | 5   | 5   | 5   |
| 5   | 5   | 5   | 5   | 5   | 5   | 5   | 5   | 5   |
| 5   | 5   | 2   | 5   | 5   | 5   | 3   | 5   | 4   |
| 5   | 5   | 5   | 5   | 5   | 5   | 5   | 5   | 5   |
| 3   | 2   | 2   | 2   | 4   | 3   | 3   | 3   | 4   |
| 3   | 4   | 5   | 1   | 5   | 5   | 5   | 5   | 5   |
| 3   | 5   | 4   | 5   | 4   | 3   | 3   | 4   | 5   |
| 4   | 2   | 3   | 1   | 5   | 3   | 3   | 4   | 4   |
| 1   | 5   | 2   | 5   | 4   | 5   | 2   | 5   | 4   |
| 5   | 2   | 3   | 5   | 4   | 2   | 5   | 5   | 5   |
| 5   | 4   | 5   | 1   | 5   | 5   | 4   | 5   | 4   |
| 1   | 1   | 5   | 1   | 5   | 5   | 5   | 5   | 3   |
| 4   | 2   | 2   | 3   | 3   | 3   | 4   | 2   | 2   |
| 3   | 2   | 3   | 2   | 4   | 4   | 3   | 3   | 4   |
| 3   | 2   | 3   | 2   | 3   | 3   | 3   | 3   | 3   |
| 4   | 3   | 2   | 2   | 4   | 4   | 4   | 4   | 4   |
| 4   | 2   | 4   | 1   | 4   | 5   | 4   | 5   | 5   |
| 4   | 2   | 2   | 2   | 4   | 4   | 3   | 4   | 3   |
| 2   | 5   | 5   | 1   | 5   | 5   | 5   | 5   | 5   |
| 1   | 1   | 5   | 1   | 5   | 5   | 5   | 5   | 5   |
| 3   | 2   | 4   | 1   | 5   | 5   | 4   | 4   | 4   |
| 3   | 4   | 5   | 1   | 5   | 4   | 4   | 5   | 4   |
| 3   | 1   | 3   | 1   | 5   | 3   | 2   | 4   | 4   |
| 4   | 1   | 4   | 1   | 4   | 4   | 4   | 4   | 4   |
| 1   | 1   | 5   | 1   | 5   | 5   | 5   | 5   | 5   |
| 5   | 5   | 5   | 5   | 5   | 5   | 5   | 5   | 5   |
| 2   | 2   | 4   | 1   | 5   | 5   | 5   | 5   | 5   |
| 1   | 5   | 5   | 1   | 5   | 5   | 5   | 5   | 5   |
| 4   | 4   | 4   | 1   | 4   | 4   | 4   | 4   | 4   |
| 2   | 4   | 4   | 2   | 5   | 5   | 5   | 4   | 4   |
| 2   | 3   | 5   | 2   | 5   | 5   | 5   | 5   | 5   |
| 1   | 2   | 3   | 2   | 5   | 5   | 3   | 3   | 5   |
| 4   | 4   | 4   | 4   | 4   | 4   | 4   | 4   | 3   |
| 4   | 4   | 4   | 4   | 4   | 4   | 4   | 4   | 4   |
| 2   | 2   | 4   | 2   | 5   | 5   | 4   | 5   | 5   |
| 5   | 5   | 5   | 5   | 5   | 5   | 5   | 5   | 5   |
| 3   | 3   | 2   | 2   | 3   | 1   | 2   | 1   | 1   |
| 4   | 5   | 1   | 1   | 1   | 2   | 1   | 5   | 2   |
| 5   | 5   | 5   | 1   | 5   | 5   | 5   | 5   | 5   |
| 4   | 4   | 5   | 1   | 5   | 5   | 5   | 5   | 5   |
| 3   | 3   | 5   | 2   | 4   | 4   | 5   | 5   | 3   |

|   |   |   |   |   |   |   |   |   |
|---|---|---|---|---|---|---|---|---|
| 5 | 3 | 2 | 2 | 4 | 4 | 4 | 4 | 4 |
| 3 | 3 | 3 | 1 | 4 | 4 | 4 | 4 | 4 |
| 2 | 3 | 2 | 2 | 3 | 2 | 4 | 5 | 5 |
| 5 | 5 | 5 | 5 | 3 | 4 | 5 | 5 | 5 |
| 5 | 3 | 3 | 1 | 3 | 5 | 5 | 3 | 2 |
| 3 | 3 | 3 | 1 | 5 | 4 | 4 | 4 | 4 |
| 1 | 3 | 5 | 1 | 5 | 5 | 5 | 5 | 5 |
| 5 | 5 | 5 | 1 | 5 | 5 | 5 | 5 | 5 |
| 4 | 3 | 2 | 2 | 4 | 4 | 5 | 4 | 2 |
| 2 | 3 | 2 | 1 | 5 | 3 | 3 | 4 | 4 |
| 3 | 3 | 4 | 2 | 4 | 3 | 4 | 4 | 4 |
| 2 | 4 | 3 | 2 | 5 | 4 | 4 | 4 | 4 |
| 3 | 5 | 5 | 1 | 5 | 5 | 5 | 5 | 4 |
| 3 | 5 | 1 | 2 | 2 | 5 | 4 | 3 | 3 |
| 2 | 4 | 4 | 2 | 4 | 4 | 4 | 4 | 4 |
| 2 | 1 | 3 | 1 | 5 | 3 | 5 | 5 | 3 |
| 1 | 1 | 5 | 1 | 5 | 5 | 5 | 5 | 5 |
| 2 | 2 | 5 | 2 | 5 | 5 | 5 | 5 | 4 |
| 4 | 4 | 4 | 1 | 5 | 4 | 4 | 3 | 4 |
| 3 | 4 | 2 | 1 | 5 | 3 | 3 | 3 | 3 |
| 2 | 4 | 3 | 2 | 5 | 4 | 4 | 4 | 4 |
| 4 | 4 | 3 | 1 | 5 | 5 | 4 | 4 | 3 |
| 5 | 5 | 5 | 5 | 5 | 5 | 5 | 5 | 5 |
| 3 | 3 | 3 | 3 | 3 | 3 | 3 | 3 | 3 |
| 4 | 3 | 2 | 3 | 3 | 3 | 3 | 3 | 3 |
| 5 | 5 | 1 | 1 | 3 | 1 | 1 | 1 | 1 |
| 2 | 3 | 4 | 1 | 5 | 5 | 4 | 4 | 4 |
| 3 | 3 | 2 | 1 | 5 | 4 | 4 | 4 | 2 |
| 4 | 1 | 3 | 1 | 4 | 4 | 3 | 3 | 2 |
| 4 | 3 | 3 | 3 | 3 | 3 | 3 | 3 | 2 |
| 4 | 3 | 1 | 3 | 3 | 3 | 1 | 1 | 1 |
| 2 | 1 | 3 | 1 | 5 | 3 | 3 | 3 | 2 |
| 3 | 2 | 4 | 1 | 5 | 5 | 3 | 5 | 4 |
| 2 | 2 | 2 | 2 | 3 | 2 | 2 | 3 | 1 |
| 2 | 1 | 3 | 1 | 5 | 4 | 4 | 3 | 5 |
| 2 | 2 | 5 | 1 | 5 | 5 | 5 | 5 | 5 |
| 4 | 1 | 4 | 1 | 5 | 4 | 5 | 4 | 4 |
| 3 | 1 | 3 | 2 | 3 | 3 | 3 | 3 | 3 |
| 5 | 3 | 5 | 2 | 3 | 2 | 1 | 3 | 2 |
| 3 | 3 | 5 | 1 | 5 | 5 | 3 | 4 | 5 |
| 4 | 2 | 3 | 2 | 4 | 3 | 3 | 3 | 3 |
| 2 | 2 | 4 | 2 | 4 | 4 | 4 | 4 | 4 |
| 3 | 3 | 3 | 3 | 3 | 3 | 3 | 3 | 3 |
| 1 | 1 | 5 | 1 | 5 | 4 | 4 | 5 | 5 |
| 2 | 5 | 2 | 1 | 3 | 2 | 2 | 1 | 2 |
| 4 | 2 | 2 | 3 | 4 | 5 | 2 | 1 | 4 |
| 4 | 4 | 4 | 4 | 4 | 3 | 3 | 3 | 4 |
| 3 | 2 | 3 | 2 | 5 | 4 | 3 | 3 | 3 |
| 1 | 4 | 4 | 1 | 5 | 5 | 5 | 5 | 4 |
| 3 | 1 | 2 | 2 | 5 | 5 | 2 | 3 | 1 |
| 4 | 3 | 2 | 2 | 4 | 4 | 2 | 2 | 2 |
| 2 | 3 | 4 | 2 | 4 | 3 | 5 | 5 | 4 |
| 2 | 2 | 2 | 2 | 2 | 2 | 4 | 2 | 2 |
| 4 | 5 | 2 | 2 | 4 | 3 | 2 | 3 | 2 |

|   |   |   |   |   |   |   |   |   |
|---|---|---|---|---|---|---|---|---|
| 3 | 3 | 3 | 3 | 3 | 3 | 3 | 3 | 3 |
| 5 | 1 | 1 | 3 | 3 | 2 | 2 | 2 | 2 |
| 1 | 3 | 4 | 1 | 5 | 5 | 4 | 2 | 3 |
| 1 | 5 | 5 | 1 | 5 | 5 | 5 | 5 | 5 |
| 1 | 1 | 5 | 1 | 5 | 5 | 5 | 5 | 5 |
| 4 | 2 | 2 | 1 | 5 | 5 | 2 | 5 | 2 |
| 4 | 5 | 3 | 1 | 2 | 3 | 3 | 3 | 3 |
| 2 | 5 | 2 | 1 | 5 | 2 | 3 | 4 | 4 |
| 1 | 1 | 4 | 1 | 5 | 5 | 5 | 2 | 5 |
| 3 | 3 | 3 | 3 | 3 | 3 | 3 | 3 | 3 |
| 3 | 3 | 3 | 3 | 3 | 3 | 3 | 3 | 3 |
| 2 | 1 | 5 | 1 | 5 | 5 | 4 | 4 | 4 |
| 3 | 3 | 4 | 1 | 5 | 5 | 4 | 4 | 5 |
| 3 | 3 | 3 | 2 | 5 | 4 | 4 | 4 | 4 |
| 2 | 4 | 4 | 2 | 4 | 5 | 4 | 4 | 4 |
| 3 | 2 | 3 | 2 | 4 | 4 | 4 | 4 | 3 |
| 3 | 3 | 4 | 1 | 5 | 3 | 4 | 3 | 3 |
| 5 | 2 | 3 | 2 | 5 | 5 | 5 | 5 | 5 |
| 3 | 2 | 4 | 2 | 4 | 4 | 4 | 4 | 4 |
| 3 | 4 | 4 | 1 | 4 | 4 | 4 | 4 | 4 |
| 3 | 4 | 4 | 2 | 5 | 4 | 4 | 4 | 3 |
| 1 | 1 | 5 | 1 | 5 | 5 | 5 | 5 | 5 |
| 3 | 3 | 4 | 3 | 3 | 3 | 3 | 3 | 3 |
| 3 | 3 | 3 | 3 | 3 | 3 | 3 | 3 | 3 |
| 4 | 3 | 2 | 3 | 4 | 2 | 2 | 2 | 2 |
| 4 | 2 | 1 | 3 | 5 | 2 | 2 | 2 | 2 |
| 3 | 5 | 3 | 3 | 3 | 3 | 3 | 3 | 2 |
| 5 | 2 | 1 | 4 | 3 | 3 | 2 | 1 | 1 |
| 5 | 4 | 2 | 1 | 4 | 5 | 4 | 4 | 3 |
| 2 | 5 | 4 | 1 | 5 | 5 | 4 | 5 | 4 |
| 2 | 5 | 4 | 1 | 4 | 4 | 4 | 4 | 4 |
| 2 | 1 | 3 | 2 | 5 | 5 | 4 | 4 | 4 |
| 3 | 3 | 4 | 5 | 4 | 3 | 3 | 3 | 3 |
| 1 | 1 | 1 | 5 | 1 | 1 | 1 | 1 | 1 |
| 3 | 4 | 2 | 2 | 2 | 3 | 5 | 5 | 2 |
| 1 | 2 | 4 | 1 | 5 | 5 | 5 | 4 | 5 |
| 3 | 3 | 3 | 1 | 5 | 4 | 5 | 4 | 3 |
| 5 | 2 | 4 | 1 | 5 | 4 | 4 | 4 | 2 |
| 4 | 1 | 4 | 4 | 4 | 4 | 4 | 4 | 4 |
| 3 | 5 | 5 | 5 | 5 | 5 | 5 | 1 | 5 |
| 1 | 4 | 4 | 2 | 5 | 5 | 4 | 5 | 5 |
| 5 | 2 | 1 | 2 | 3 | 2 | 4 | 2 | 1 |
| 3 | 3 | 3 | 2 | 1 | 3 | 3 | 3 | 3 |
| 5 | 3 | 2 | 3 | 5 | 3 | 3 | 3 | 2 |
| 1 | 1 | 5 | 1 | 5 | 3 | 3 | 3 | 5 |
| 1 | 4 | 4 | 1 | 5 | 5 | 4 | 3 | 5 |
| 5 | 1 | 1 | 1 | 3 | 1 | 1 | 1 | 1 |
| 3 | 3 | 4 | 1 | 5 | 5 | 5 | 4 | 5 |
| 3 | 2 | 4 | 2 | 4 | 4 | 3 | 4 | 3 |
| 5 | 4 | 2 | 1 | 4 | 5 | 2 | 3 | 2 |
| 2 | 3 | 4 | 1 | 5 | 5 | 4 | 4 | 4 |
| 3 | 5 | 3 | 5 | 5 | 5 | 3 | 5 | 3 |
| 5 | 3 | 3 | 1 | 5 | 2 | 3 | 4 | 5 |
| 2 | 2 | 4 | 2 | 4 | 4 | 4 | 4 | 4 |

|   |   |   |   |   |   |   |   |   |
|---|---|---|---|---|---|---|---|---|
| 1 | 2 | 3 | 1 | 5 | 4 | 3 | 5 | 5 |
| 3 | 2 | 3 | 2 | 4 | 4 | 3 | 3 | 3 |
| 1 | 5 | 5 | 1 | 5 | 5 | 5 | 5 | 5 |
| 4 | 2 | 2 | 2 | 4 | 3 | 2 | 3 | 2 |
| 4 | 2 | 4 | 1 | 5 | 5 | 4 | 5 | 2 |
| 2 | 4 | 4 | 2 | 4 | 4 | 4 | 4 | 4 |
| 3 | 3 | 4 | 2 | 5 | 3 | 3 | 4 | 4 |
| 2 | 2 | 4 | 2 | 4 | 4 | 4 | 4 | 4 |
| 3 | 3 | 2 | 4 | 3 | 2 | 2 | 2 | 3 |
| 2 | 2 | 2 | 1 | 4 | 2 | 2 | 4 | 4 |
| 3 | 4 | 4 | 2 | 5 | 4 | 4 | 3 | 5 |
| 1 | 3 | 5 | 1 | 5 | 5 | 4 | 5 | 5 |
| 3 | 3 | 3 | 2 | 4 | 3 | 3 | 4 | 2 |
| 1 | 1 | 5 | 1 | 5 | 5 | 5 | 5 | 5 |
| 3 | 3 | 3 | 2 | 4 | 4 | 3 | 3 | 3 |
| 5 | 4 | 2 | 1 | 5 | 4 | 2 | 4 | 2 |
| 2 | 4 | 4 | 1 | 5 | 5 | 5 | 5 | 4 |
| 4 | 3 | 4 | 2 | 4 | 4 | 3 | 4 | 4 |
| 3 | 3 | 3 | 3 | 3 | 1 | 1 | 3 | 3 |
| 1 | 5 | 5 | 5 | 5 | 5 | 5 | 5 | 5 |
| 4 | 4 | 3 | 1 | 5 | 3 | 2 | 4 | 3 |
| 2 | 4 | 5 | 1 | 5 | 5 | 5 | 5 | 4 |
| 3 | 4 | 3 | 1 | 5 | 4 | 3 | 3 | 2 |
| 2 | 2 | 5 | 1 | 5 | 5 | 5 | 5 | 5 |
| 5 | 1 | 1 | 3 | 5 | 1 | 1 | 1 | 1 |
| 4 | 3 | 3 | 2 | 4 | 2 | 2 | 3 | 2 |
| 4 | 2 | 2 | 2 | 4 | 3 | 3 | 3 | 2 |
| 3 | 3 | 3 | 2 | 4 | 3 | 3 | 3 | 3 |
| 5 | 1 | 1 | 2 | 4 | 1 | 1 | 1 | 1 |
| 3 | 3 | 3 | 2 | 5 | 5 | 5 | 5 | 5 |
| 4 | 3 | 3 | 2 | 4 | 3 | 4 | 4 | 2 |
| 1 | 4 | 5 | 1 | 5 | 5 | 5 | 5 | 5 |
| 3 | 1 | 5 | 1 | 5 | 5 | 5 | 5 | 4 |
| 1 | 1 | 3 | 1 | 5 | 5 | 1 | 3 | 5 |
| 3 | 2 | 1 | 2 | 4 | 4 | 4 | 3 | 4 |
| 3 | 2 | 4 | 1 | 5 | 5 | 5 | 5 | 4 |
| 3 | 4 | 3 | 2 | 4 | 4 | 2 | 3 | 3 |
| 3 | 3 | 4 | 1 | 5 | 5 | 4 | 4 | 3 |
| 2 | 4 | 3 | 1 | 4 | 3 | 3 | 3 | 4 |
| 1 | 4 | 5 | 2 | 5 | 5 | 5 | 5 | 5 |
| 3 | 5 | 3 | 1 | 5 | 5 | 5 | 5 | 5 |
| 4 | 4 | 4 | 2 | 4 | 4 | 4 | 4 | 4 |
| 5 | 2 | 2 | 1 | 5 | 4 | 5 | 5 | 5 |
| 3 | 4 | 3 | 1 | 4 | 4 | 3 | 4 | 3 |
| 4 | 3 | 3 | 2 | 4 | 3 | 4 | 3 | 4 |
| 3 | 4 | 3 | 2 | 4 | 3 | 3 | 4 | 3 |
| 3 | 3 | 3 | 3 | 3 | 3 | 3 | 3 | 3 |
| 1 | 2 | 5 | 1 | 5 | 5 | 5 | 5 | 5 |
| 2 | 2 | 5 | 1 | 5 | 5 | 5 | 5 | 4 |
| 3 | 1 | 5 | 1 | 5 | 5 | 5 | 5 | 5 |
| 1 | 2 | 4 | 1 | 5 | 5 | 4 | 5 | 4 |
| 3 | 1 | 4 | 1 | 4 | 3 | 4 | 3 | 3 |
| 3 | 3 | 3 | 3 | 3 | 3 | 3 | 3 | 3 |
| 4 | 4 | 4 | 1 | 5 | 5 | 4 | 5 | 4 |

|   |   |   |   |   |   |   |   |   |
|---|---|---|---|---|---|---|---|---|
| 3 | 3 | 3 | 3 | 3 | 3 | 3 | 3 | 1 |
| 1 | 5 | 4 | 5 | 3 | 2 | 1 | 5 | 5 |
| 2 | 5 | 3 | 1 | 4 | 4 | 4 | 5 | 5 |
| 3 | 2 | 2 | 1 | 4 | 3 | 3 | 3 | 3 |
| 5 | 4 | 4 | 1 | 5 | 5 | 5 | 5 | 5 |
| 2 | 2 | 5 | 1 | 5 | 5 | 5 | 5 | 5 |
| 1 | 4 | 4 | 4 | 3 | 4 | 4 | 4 | 4 |
| 1 | 1 | 4 | 4 | 5 | 4 | 4 | 2 | 5 |
| 4 | 2 | 2 | 2 | 4 | 4 | 4 | 4 | 4 |
| 2 | 4 | 2 | 2 | 4 | 4 | 3 | 4 | 3 |
| 3 | 3 | 3 | 1 | 5 | 3 | 3 | 3 | 3 |
| 1 | 1 | 3 | 1 | 5 | 5 | 5 | 5 | 5 |
| 1 | 1 | 1 | 1 | 1 | 1 | 1 | 1 | 1 |
| 3 | 3 | 5 | 1 | 4 | 4 | 5 | 5 | 3 |
| 5 | 3 | 2 | 2 | 4 | 5 | 4 | 4 | 4 |
| 4 | 5 | 5 | 1 | 5 | 5 | 5 | 5 | 5 |
| 3 | 3 | 3 | 3 | 3 | 3 | 3 | 3 | 3 |
| 3 | 3 | 4 | 2 | 4 | 4 | 3 | 3 | 3 |
| 3 | 2 | 3 | 3 | 4 | 4 | 3 | 3 | 3 |
| 4 | 4 | 3 | 1 | 4 | 5 | 5 | 4 | 4 |
| 3 | 4 | 4 | 3 | 4 | 3 | 4 | 4 | 4 |
| 2 | 4 | 4 | 2 | 4 | 4 | 4 | 3 | 4 |
| 2 | 3 | 5 | 1 | 5 | 5 | 5 | 5 | 5 |
| 1 | 5 | 5 | 5 | 5 | 5 | 5 | 5 | 5 |
| 3 | 3 | 3 | 3 | 3 | 3 | 3 | 3 | 4 |
| 4 | 4 | 2 | 2 | 5 | 3 | 3 | 3 | 3 |
| 3 | 3 | 2 | 2 | 4 | 4 | 3 | 3 | 3 |
| 3 | 3 | 5 | 1 | 5 | 5 | 5 | 5 | 5 |
| 4 | 3 | 4 | 3 | 4 | 5 | 4 | 5 | 3 |
| 2 | 1 | 2 | 1 | 5 | 5 | 4 | 4 | 4 |
| 3 | 3 | 2 | 2 | 3 | 3 | 3 | 3 | 3 |
| 5 | 1 | 1 | 3 | 3 | 4 | 1 | 1 | 1 |
| 5 | 2 | 1 | 3 | 4 | 2 | 2 | 2 | 2 |
| 5 | 5 | 5 | 1 | 5 | 5 | 5 | 5 | 4 |
| 2 | 3 | 3 | 1 | 4 | 3 | 4 | 4 | 4 |
| 3 | 2 | 3 | 2 | 5 | 4 | 3 | 4 | 3 |
| 4 | 1 | 2 | 1 | 5 | 4 | 3 | 4 | 3 |
| 4 | 4 | 4 | 1 | 5 | 5 | 4 | 1 | 1 |
| 4 | 4 | 4 | 4 | 4 | 4 | 4 | 4 | 4 |
| 2 | 5 | 5 | 2 | 5 | 5 | 5 | 5 | 1 |
| 2 | 4 | 4 | 2 | 4 | 4 | 4 | 4 | 4 |
| 1 | 3 | 3 | 1 | 4 | 3 | 3 | 3 | 2 |
| 5 | 3 | 4 | 1 | 3 | 3 | 4 | 5 | 2 |
| 2 | 1 | 5 | 1 | 5 | 5 | 5 | 5 | 5 |
| 1 | 1 | 3 | 1 | 5 | 3 | 5 | 5 | 5 |
| 3 | 3 | 3 | 2 | 4 | 4 | 3 | 4 | 3 |
| 2 | 4 | 2 | 1 | 4 | 3 | 3 | 5 | 3 |
| 4 | 2 | 1 | 1 | 4 | 4 | 3 | 3 | 2 |
| 1 | 4 | 5 | 1 | 5 | 5 | 5 | 3 | 4 |
| 3 | 4 | 3 | 4 | 4 | 3 | 4 | 4 | 2 |
| 3 | 3 | 3 | 3 | 4 | 4 | 4 | 4 | 4 |
| 1 | 3 | 5 | 1 | 5 | 5 | 5 | 5 | 5 |
| 3 | 3 | 3 | 3 | 3 | 3 | 3 | 3 | 3 |
| 4 | 3 | 4 | 2 | 4 | 3 | 3 | 4 | 3 |



|   |   |   |   |   |   |   |   |   |
|---|---|---|---|---|---|---|---|---|
| 5 | 1 | 4 | 1 | 5 | 5 | 5 | 5 | 5 |
| 3 | 1 | 4 | 1 | 4 | 3 | 3 | 4 | 4 |
| 4 | 3 | 2 | 1 | 5 | 3 | 3 | 2 | 1 |
| 3 | 3 | 3 | 2 | 4 | 3 | 3 | 3 | 3 |
| 3 | 3 | 3 | 3 | 3 | 3 | 3 | 3 | 3 |
| 1 | 5 | 4 | 1 | 5 | 5 | 4 | 5 | 5 |
| 1 | 1 | 5 | 1 | 5 | 5 | 5 | 4 | 5 |
| 4 | 4 | 4 | 4 | 4 | 4 | 4 | 4 | 4 |
| 5 | 3 | 2 | 1 | 5 | 3 | 5 | 2 | 4 |
| 5 | 1 | 1 | 1 | 5 | 1 | 1 | 1 | 1 |
| 3 | 2 | 3 | 1 | 4 | 4 | 3 | 4 | 3 |
| 5 | 4 | 2 | 1 | 5 | 5 | 4 | 4 | 2 |
| 4 | 2 | 2 | 2 | 4 | 4 | 2 | 2 | 2 |
| 1 | 4 | 3 | 1 | 5 | 5 | 3 | 3 | 3 |
| 5 | 1 | 3 | 1 | 5 | 5 | 4 | 4 | 2 |
| 2 | 3 | 5 | 2 | 5 | 5 | 5 | 5 | 5 |
| 3 | 3 | 3 | 3 | 3 | 3 | 3 | 3 | 3 |
| 4 | 2 | 2 | 1 | 4 | 4 | 2 | 2 | 2 |
| 4 | 4 | 4 | 1 | 5 | 5 | 5 | 5 | 5 |
| 4 | 3 | 3 | 3 | 4 | 3 | 2 | 2 | 2 |
| 3 | 4 | 4 | 3 | 4 | 4 | 4 | 4 | 4 |
| 4 | 2 | 3 | 2 | 5 | 4 | 3 | 4 | 4 |
| 5 | 2 | 4 | 1 | 5 | 5 | 4 | 5 | 3 |
| 2 | 2 | 4 | 2 | 4 | 2 | 3 | 2 | 2 |
| 1 | 1 | 5 | 1 | 5 | 5 | 5 | 5 | 5 |
| 5 | 1 | 1 | 1 | 5 | 1 | 5 | 3 | 1 |
| 4 | 3 | 2 | 2 | 4 | 4 | 4 | 4 | 4 |
| 4 | 4 | 3 | 2 | 4 | 3 | 3 | 4 | 4 |
| 1 | 3 | 5 | 1 | 5 | 5 | 5 | 5 | 5 |
| 4 | 2 | 4 | 1 | 5 | 5 | 5 | 5 | 5 |
| 1 | 1 | 4 | 1 | 5 | 5 | 5 | 5 | 5 |
| 3 | 2 | 4 | 2 | 5 | 3 | 3 | 4 | 4 |
| 5 | 1 | 1 | 4 | 3 | 2 | 2 | 1 | 1 |
| 5 | 5 | 5 | 2 | 5 | 5 | 5 | 5 | 5 |
| 4 | 3 | 3 | 2 | 4 | 3 | 3 | 3 | 4 |
| 4 | 5 | 5 | 2 | 4 | 3 | 3 | 4 | 3 |
| 3 | 2 | 5 | 1 | 5 | 5 | 5 | 4 | 3 |
| 3 | 3 | 4 | 1 | 5 | 5 | 4 | 4 | 4 |
| 4 | 4 | 4 | 4 | 4 | 4 | 4 | 2 | 2 |
| 4 | 2 | 4 | 4 | 4 | 4 | 3 | 4 | 4 |
| 2 | 2 | 4 | 2 | 4 | 4 | 4 | 4 | 4 |
| 4 | 3 | 2 | 3 | 4 | 3 | 3 | 3 | 3 |
| 4 | 3 | 3 | 2 | 4 | 3 | 3 | 3 | 2 |
| 4 | 4 | 4 | 2 | 5 | 4 | 4 | 4 | 4 |
| 4 | 3 | 2 | 2 | 4 | 4 | 3 | 4 | 3 |
| 4 | 2 | 2 | 2 | 4 | 2 | 2 | 2 | 2 |
| 4 | 4 | 4 | 2 | 3 | 4 | 4 | 3 | 4 |
| 2 | 2 | 4 | 2 | 4 | 4 | 4 | 4 | 4 |
| 1 | 1 | 4 | 1 | 4 | 5 | 4 | 3 | 5 |
| 4 | 2 | 4 | 1 | 5 | 5 | 2 | 3 | 3 |
| 5 | 3 | 1 | 3 | 4 | 2 | 4 | 3 | 3 |
| 2 | 1 | 4 | 1 | 5 | 5 | 5 | 5 | 5 |
| 4 | 4 | 2 | 2 | 4 | 4 | 3 | 4 | 4 |
| 4 | 3 | 2 | 4 | 4 | 2 | 2 | 2 | 2 |

|   |   |   |   |   |   |   |   |   |
|---|---|---|---|---|---|---|---|---|
| 3 | 4 | 4 | 1 | 4 | 4 | 2 | 4 | 4 |
| 5 | 3 | 4 | 4 | 5 | 4 | 4 | 4 | 4 |
| 5 | 3 | 3 | 1 | 5 | 5 | 4 | 4 | 3 |
| 4 | 5 | 5 | 2 | 5 | 5 | 5 | 5 | 5 |
| 4 | 4 | 4 | 4 | 4 | 4 | 5 | 4 | 4 |
| 4 | 2 | 2 | 2 | 4 | 2 | 2 | 2 | 2 |
| 4 | 2 | 4 | 1 | 4 | 4 | 4 | 4 | 4 |
| 4 | 2 | 3 | 2 | 4 | 2 | 2 | 2 | 4 |
| 4 | 2 | 2 | 3 | 4 | 4 | 3 | 3 | 3 |
| 4 | 4 | 3 | 3 | 4 | 4 | 3 | 4 | 4 |
| 3 | 2 | 4 | 1 | 5 | 5 | 3 | 2 | 3 |
| 2 | 3 | 4 | 2 | 4 | 4 | 4 | 4 | 4 |
| 4 | 4 | 4 | 4 | 4 | 4 | 4 | 4 | 4 |
| 3 | 3 | 4 | 2 | 4 | 4 | 4 | 4 | 4 |
| 4 | 3 | 3 | 2 | 4 | 4 | 3 | 4 | 4 |
| 4 | 4 | 4 | 4 | 4 | 4 | 4 | 4 | 4 |
| 4 | 4 | 4 | 4 | 4 | 4 | 4 | 4 | 4 |
| 4 | 3 | 4 | 1 | 5 | 4 | 4 | 4 | 3 |
| 3 | 3 | 3 | 2 | 4 | 4 | 3 | 3 | 3 |
| 3 | 3 | 3 | 3 | 3 | 3 | 3 | 3 | 3 |
| 2 | 1 | 4 | 2 | 4 | 4 | 4 | 4 | 4 |
| 4 | 4 | 3 | 2 | 4 | 3 | 3 | 4 | 3 |
| 4 | 3 | 3 | 2 | 5 | 5 | 4 | 5 | 4 |
| 3 | 3 | 3 | 2 | 4 | 4 | 3 | 4 | 4 |
| 4 | 2 | 4 | 2 | 4 | 4 | 4 | 4 | 4 |
| 5 | 4 | 5 | 1 | 5 | 5 | 4 | 5 | 2 |
| 3 | 2 | 3 | 2 | 3 | 3 | 4 | 5 | 4 |
| 4 | 2 | 2 | 2 | 4 | 4 | 2 | 4 | 2 |
| 4 | 2 | 2 | 1 | 5 | 5 | 2 | 4 | 4 |
| 3 | 4 | 3 | 2 | 4 | 4 | 4 | 3 | 4 |
| 4 | 4 | 4 | 1 | 5 | 4 | 4 | 4 | 4 |
| 5 | 2 | 2 | 2 | 4 | 2 | 3 | 4 | 4 |
| 4 | 3 | 4 | 2 | 5 | 4 | 4 | 4 | 3 |
| 3 | 4 | 3 | 1 | 5 | 4 | 4 | 3 | 4 |
| 2 | 4 | 4 | 2 | 4 | 4 | 4 | 4 | 4 |
| 4 | 3 | 2 | 1 | 4 | 3 | 3 | 4 | 3 |
| 5 | 1 | 2 | 1 | 4 | 2 | 2 | 4 | 2 |
| 5 | 5 | 4 | 2 | 4 | 3 | 3 | 3 | 3 |
| 2 | 2 | 4 | 2 | 4 | 4 | 4 | 4 | 2 |
| 5 | 5 | 1 | 1 | 5 | 5 | 5 | 5 | 1 |
| 4 | 3 | 2 | 2 | 5 | 3 | 3 | 4 | 2 |
| 5 | 4 | 3 | 3 | 4 | 4 | 4 | 2 | 3 |
| 3 | 3 | 2 | 3 | 3 | 3 | 3 | 3 | 3 |
| 4 | 3 | 2 | 2 | 4 | 3 | 3 | 3 | 3 |
| 3 | 4 | 2 | 1 | 5 | 3 | 1 | 3 | 2 |
| 2 | 3 | 4 | 2 | 4 | 4 | 4 | 4 | 4 |
| 4 | 2 | 2 | 1 | 4 | 3 | 2 | 4 | 2 |
| 3 | 1 | 4 | 2 | 5 | 5 | 5 | 5 | 5 |
| 2 | 2 | 4 | 2 | 4 | 4 | 4 | 4 | 4 |
| 2 | 2 | 5 | 3 | 3 | 3 | 4 | 4 | 4 |
| 4 | 2 | 5 | 1 | 5 | 5 | 5 | 5 | 4 |
| 4 | 2 | 4 | 4 | 2 | 4 | 4 | 4 | 4 |
| 4 | 4 | 4 | 2 | 4 | 5 | 5 | 4 | 3 |
| 4 | 4 | 3 | 3 | 3 | 3 | 3 | 3 | 2 |

|   |   |   |   |   |   |   |   |   |
|---|---|---|---|---|---|---|---|---|
| 3 | 2 | 3 | 2 | 2 | 4 | 4 | 4 | 3 |
| 2 | 4 | 2 | 1 | 5 | 5 | 5 | 5 | 5 |
| 4 | 2 | 2 | 2 | 4 | 4 | 4 | 4 | 4 |
| 5 | 3 | 3 | 3 | 3 | 3 | 3 | 3 | 5 |
| 4 | 3 | 2 | 2 | 4 | 2 | 2 | 4 | 2 |
| 2 | 5 | 5 | 1 | 5 | 5 | 5 | 5 | 5 |
| 3 | 3 | 3 | 2 | 4 | 4 | 4 | 4 | 3 |
| 4 | 1 | 4 | 1 | 4 | 2 | 2 | 5 | 1 |
| 4 | 3 | 3 | 2 | 4 | 4 | 3 | 4 | 4 |
| 5 | 5 | 3 | 3 | 4 | 2 | 2 | 1 | 1 |
| 4 | 4 | 3 | 2 | 4 | 4 | 4 | 4 | 4 |
| 3 | 4 | 3 | 2 | 4 | 5 | 3 | 4 | 4 |
| 3 | 3 | 3 | 3 | 4 | 4 | 3 | 3 | 3 |
| 4 | 2 | 4 | 2 | 4 | 4 | 4 | 4 | 4 |
| 3 | 3 | 4 | 1 | 1 | 5 | 3 | 3 | 3 |
| 2 | 3 | 4 | 2 | 4 | 3 | 3 | 3 | 3 |
| 4 | 1 | 2 | 1 | 4 | 4 | 3 | 4 | 2 |
| 4 | 3 | 4 | 4 | 3 | 5 | 5 | 4 | 5 |
| 1 | 5 | 5 | 1 | 5 | 5 | 5 | 5 | 5 |
| 1 | 2 | 5 | 1 | 5 | 5 | 5 | 5 | 5 |
| 5 | 4 | 4 | 4 | 5 | 5 | 5 | 4 | 4 |
| 2 | 2 | 5 | 1 | 5 | 5 | 5 | 5 | 5 |
| 3 | 4 | 4 | 1 | 5 | 5 | 4 | 4 | 4 |
| 3 | 1 | 5 | 1 | 5 | 5 | 5 | 5 | 5 |
| 5 | 1 | 1 | 5 | 3 | 3 | 3 | 3 | 1 |
| 4 | 3 | 2 | 2 | 4 | 3 | 3 | 4 | 3 |
| 5 | 1 | 4 | 1 | 4 | 4 | 4 | 4 | 4 |
| 5 | 3 | 3 | 1 | 5 | 5 | 3 | 5 | 3 |
| 5 | 3 | 3 | 2 | 4 | 3 | 4 | 3 | 4 |
| 5 | 4 | 3 | 1 | 5 | 3 | 3 | 3 | 3 |
| 2 | 3 | 5 | 1 | 5 | 5 | 5 | 5 | 4 |
| 3 | 3 | 3 | 3 | 3 | 3 | 3 | 3 | 3 |
| 3 | 3 | 4 | 2 | 5 | 5 | 4 | 5 | 5 |
| 5 | 1 | 1 | 4 | 1 | 1 | 1 | 1 | 1 |
| 4 | 4 | 2 | 2 | 4 | 2 | 3 | 2 | 2 |
| 4 | 1 | 1 | 3 | 4 | 4 | 3 | 3 | 3 |
| 2 | 2 | 2 | 2 | 2 | 2 | 2 | 2 | 2 |
| 4 | 2 | 2 | 2 | 4 | 4 | 3 | 4 | 4 |
| 5 | 2 | 2 | 2 | 4 | 4 | 2 | 4 | 4 |
| 2 | 3 | 2 | 1 | 3 | 2 | 2 | 2 | 2 |
| 5 | 2 | 3 | 1 | 5 | 5 | 5 | 5 | 5 |
| 4 | 3 | 3 | 2 | 4 | 4 | 3 | 4 | 3 |
| 5 | 2 | 2 | 3 | 4 | 2 | 2 | 2 | 2 |
| 5 | 5 | 2 | 3 | 4 | 4 | 4 | 2 | 3 |
| 4 | 4 | 4 | 4 | 4 | 4 | 4 | 4 | 4 |
| 2 | 2 | 2 | 2 | 4 | 2 | 4 | 4 | 4 |
| 2 | 2 | 4 | 2 | 4 | 4 | 4 | 3 | 4 |
| 5 | 1 | 1 | 5 | 1 | 4 | 2 | 3 | 1 |
| 1 | 1 | 5 | 1 | 5 | 5 | 4 | 5 | 4 |
| 2 | 3 | 3 | 2 | 4 | 4 | 3 | 4 | 4 |
| 5 | 2 | 3 | 3 | 3 | 3 | 3 | 5 | 5 |
| 3 | 3 | 3 | 3 | 3 | 3 | 3 | 5 | 4 |
| 5 | 4 | 2 | 2 | 4 | 4 | 2 | 2 | 2 |
| 3 | 3 | 3 | 2 | 4 | 4 | 4 | 4 | 4 |

|   |   |   |   |   |   |   |   |   |
|---|---|---|---|---|---|---|---|---|
| 4 | 2 | 2 | 1 | 5 | 4 | 3 | 3 | 3 |
| 3 | 3 | 2 | 3 | 4 | 2 | 3 | 3 | 3 |
| 4 | 2 | 5 | 1 | 5 | 5 | 2 | 5 | 2 |
| 4 | 2 | 4 | 1 | 4 | 5 | 3 | 4 | 4 |
| 5 | 5 | 1 | 3 | 1 | 1 | 1 | 3 | 1 |
| 3 | 2 | 2 | 1 | 5 | 2 | 3 | 3 | 2 |
| 3 | 3 | 4 | 1 | 5 | 4 | 4 | 4 | 4 |
| 3 | 2 | 2 | 2 | 3 | 2 | 3 | 3 | 2 |
| 3 | 4 | 5 | 1 | 5 | 5 | 5 | 5 | 4 |
| 5 | 2 | 5 | 1 | 5 | 5 | 5 | 5 | 3 |
| 4 | 2 | 4 | 2 | 4 | 4 | 4 | 4 | 4 |
| 5 | 4 | 4 | 1 | 5 | 5 | 5 | 5 | 5 |
| 4 | 2 | 4 | 1 | 5 | 5 | 5 | 5 | 5 |
| 5 | 3 | 2 | 3 | 4 | 4 | 3 | 4 | 2 |
| 4 | 2 | 3 | 2 | 4 | 3 | 3 | 4 | 3 |
| 1 | 5 | 5 | 1 | 5 | 5 | 5 | 5 | 5 |
| 4 | 2 | 4 | 2 | 5 | 4 | 4 | 4 | 3 |
| 5 | 3 | 3 | 3 | 4 | 4 | 3 | 3 | 2 |
| 3 | 2 | 3 | 1 | 5 | 4 | 4 | 4 | 4 |
| 4 | 2 | 4 | 1 | 5 | 4 | 4 | 4 | 4 |
| 3 | 3 | 3 | 2 | 4 | 3 | 3 | 3 | 3 |
| 4 | 4 | 4 | 2 | 4 | 4 | 4 | 4 | 4 |
| 4 | 3 | 2 | 2 | 4 | 3 | 3 | 3 | 4 |
| 4 | 4 | 2 | 3 | 4 | 4 | 3 | 3 | 3 |
| 4 | 3 | 2 | 2 | 4 | 2 | 3 | 4 | 2 |
| 1 | 1 | 1 | 1 | 5 | 1 | 3 | 1 | 1 |
| 2 | 2 | 5 | 1 | 4 | 1 | 5 | 5 | 4 |
| 5 | 2 | 2 | 2 | 4 | 3 | 3 | 3 | 2 |
| 5 | 5 | 5 | 5 | 5 | 5 | 5 | 5 | 5 |
| 4 | 2 | 2 | 2 | 4 | 2 | 2 | 2 | 2 |
| 4 | 4 | 3 | 2 | 5 | 5 | 4 | 4 | 3 |
| 2 | 5 | 5 | 1 | 5 | 5 | 5 | 5 | 5 |
| 3 | 3 | 2 | 2 | 4 | 2 | 2 | 2 | 2 |
| 4 | 2 | 3 | 2 | 4 | 4 | 4 | 4 | 4 |
| 1 | 1 | 5 | 1 | 5 | 5 | 5 | 5 | 5 |
| 4 | 3 | 3 | 2 | 4 | 3 | 3 | 3 | 4 |
| 4 | 2 | 4 | 1 | 5 | 5 | 5 | 5 | 5 |
| 4 | 2 | 3 | 4 | 4 | 4 | 4 | 4 | 4 |
| 5 | 5 | 3 | 3 | 4 | 2 | 2 | 2 | 2 |
| 3 | 4 | 4 | 2 | 4 | 4 | 4 | 4 | 4 |
| 4 | 2 | 4 | 2 | 4 | 3 | 3 | 4 | 4 |
| 4 | 5 | 2 | 1 | 5 | 4 | 5 | 5 | 4 |
| 4 | 4 | 2 | 2 | 4 | 4 | 3 | 2 | 2 |
| 4 | 2 | 4 | 2 | 4 | 4 | 3 | 4 | 4 |
| 2 | 3 | 5 | 1 | 5 | 5 | 5 | 5 | 4 |
| 4 | 2 | 5 | 1 | 5 | 4 | 4 | 4 | 4 |
| 4 | 3 | 4 | 1 | 3 | 3 | 2 | 5 | 3 |
| 4 | 2 | 4 | 2 | 4 | 4 | 4 | 4 | 4 |
| 4 | 3 | 1 | 4 | 3 | 2 | 2 | 2 | 2 |
| 3 | 3 | 3 | 3 | 3 | 3 | 3 | 3 | 3 |
| 2 | 2 | 4 | 2 | 4 | 4 | 4 | 4 | 4 |
| 3 | 3 | 3 | 3 | 3 | 3 | 3 | 3 | 3 |
| 4 | 4 | 3 | 1 | 4 | 3 | 3 | 3 | 4 |
| 4 | 3 | 3 | 2 | 4 | 4 | 3 | 4 | 4 |

|   |   |   |   |   |   |   |   |   |
|---|---|---|---|---|---|---|---|---|
| 2 | 2 | 3 | 2 | 2 | 3 | 3 | 3 | 3 |
| 5 | 4 | 4 | 4 | 4 | 4 | 3 | 4 | 5 |
| 4 | 2 | 2 | 2 | 4 | 4 | 3 | 4 | 2 |
| 2 | 4 | 2 | 4 | 3 | 3 | 2 | 4 | 2 |
| 3 | 3 | 3 | 3 | 4 | 4 | 3 | 4 | 4 |
| 2 | 2 | 5 | 2 | 4 | 5 | 4 | 4 | 4 |
| 3 | 3 | 1 | 4 | 4 | 3 | 1 | 1 | 2 |
| 4 | 2 | 2 | 2 | 2 | 2 | 3 | 2 | 2 |
| 5 | 3 | 1 | 2 | 3 | 2 | 1 | 2 | 2 |
| 5 | 1 | 1 | 1 | 1 | 3 | 3 | 3 | 1 |
| 3 | 3 | 3 | 1 | 5 | 4 | 3 | 5 | 3 |
| 4 | 3 | 3 | 2 | 5 | 4 | 3 | 4 | 4 |
| 5 | 2 | 3 | 3 | 4 | 4 | 3 | 3 | 3 |
| 4 | 2 | 4 | 1 | 5 | 4 | 4 | 4 | 4 |
| 2 | 4 | 2 | 2 | 5 | 5 | 3 | 4 | 4 |
| 5 | 3 | 4 | 2 | 5 | 4 | 3 | 4 | 4 |
| 3 | 3 | 2 | 2 | 4 | 3 | 2 | 2 | 2 |
| 3 | 2 | 2 | 2 | 4 | 3 | 3 | 3 | 3 |
| 2 | 2 | 3 | 1 | 5 | 5 | 4 | 4 | 4 |
| 4 | 1 | 1 | 1 | 5 | 5 | 4 | 4 | 4 |
| 4 | 3 | 2 | 3 | 3 | 2 | 3 | 2 | 2 |
| 4 | 4 | 4 | 4 | 4 | 4 | 4 | 4 | 4 |
| 3 | 3 | 2 | 3 | 3 | 3 | 2 | 3 | 4 |
| 3 | 3 | 3 | 3 | 4 | 4 | 2 | 3 | 3 |
| 3 | 4 | 4 | 1 | 5 | 5 | 5 | 5 | 5 |
| 5 | 3 | 5 | 1 | 5 | 3 | 1 | 5 | 5 |
| 3 | 3 | 3 | 2 | 4 | 4 | 4 | 4 | 4 |
| 4 | 4 | 3 | 2 | 4 | 4 | 4 | 4 | 4 |
| 4 | 2 | 3 | 2 | 5 | 3 | 4 | 4 | 3 |
| 2 | 1 | 2 | 1 | 5 | 2 | 1 | 3 | 3 |
| 5 | 4 | 5 | 5 | 5 | 5 | 5 | 5 | 5 |
| 1 | 4 | 2 | 2 | 3 | 2 | 4 | 3 | 4 |
| 3 | 3 | 3 | 2 | 2 | 2 | 2 | 2 | 2 |
| 4 | 4 | 4 | 4 | 4 | 4 | 4 | 4 | 4 |
| 2 | 3 | 4 | 2 | 5 | 5 | 4 | 4 | 4 |
| 3 | 3 | 3 | 3 | 3 | 3 | 3 | 3 | 3 |
| 1 | 5 | 5 | 1 | 5 | 5 | 5 | 5 | 5 |
| 1 | 2 | 5 | 1 | 5 | 5 | 5 | 5 | 5 |
| 4 | 4 | 4 | 4 | 4 | 3 | 4 | 3 | 3 |
| 1 | 3 | 5 | 1 | 5 | 5 | 5 | 5 | 5 |
| 4 | 4 | 4 | 4 | 4 | 4 | 4 | 4 | 4 |
| 4 | 3 | 2 | 2 | 2 | 4 | 4 | 2 | 2 |
| 2 | 2 | 4 | 2 | 3 | 3 | 2 | 5 | 5 |
| 3 | 4 | 4 | 2 | 4 | 4 | 4 | 4 | 4 |
| 4 | 4 | 4 | 4 | 4 | 4 | 4 | 4 | 4 |
| 4 | 3 | 2 | 3 | 4 | 3 | 3 | 3 | 2 |
| 4 | 4 | 4 | 3 | 4 | 4 | 4 | 4 | 2 |
| 4 | 4 | 4 | 1 | 4 | 4 | 4 | 4 | 4 |
| 2 | 4 | 4 | 2 | 5 | 4 | 4 | 4 | 4 |
| 2 | 3 | 4 | 2 | 4 | 4 | 4 | 4 | 4 |
| 2 | 2 | 4 | 2 | 4 | 4 | 4 | 4 | 3 |
| 3 | 4 | 4 | 3 | 3 | 4 | 3 | 3 | 3 |
| 1 | 1 | 5 | 1 | 5 | 5 | 5 | 5 | 5 |
| 2 | 2 | 5 | 1 | 4 | 4 | 4 | 5 | 5 |

|   |   |   |   |   |   |   |   |   |
|---|---|---|---|---|---|---|---|---|
| 4 | 1 | 5 | 1 | 5 | 5 | 5 | 5 | 5 |
| 1 | 5 | 5 | 1 | 5 | 5 | 5 | 5 | 5 |
| 4 | 2 | 4 | 2 | 4 | 4 | 4 | 4 | 4 |
| 5 | 3 | 2 | 3 | 3 | 2 | 2 | 4 | 4 |
| 2 | 2 | 4 | 2 | 5 | 5 | 4 | 4 | 5 |
| 1 | 2 | 5 | 1 | 5 | 5 | 5 | 5 | 5 |
| 5 | 2 | 2 | 1 | 5 | 5 | 3 | 3 | 2 |
| 3 | 3 | 5 | 1 | 5 | 5 | 5 | 5 | 3 |
| 3 | 2 | 3 | 1 | 5 | 3 | 2 | 3 | 3 |
| 3 | 3 | 4 | 1 | 5 | 5 | 4 | 4 | 4 |
| 1 | 2 | 4 | 1 | 5 | 5 | 4 | 3 | 4 |
| 2 | 2 | 3 | 2 | 2 | 2 | 2 | 1 | 2 |
| 3 | 2 | 3 | 2 | 4 | 3 | 4 | 4 | 3 |
| 2 | 2 | 4 | 2 | 4 | 4 | 4 | 4 | 4 |
| 3 | 4 | 4 | 2 | 4 | 4 | 4 | 4 | 4 |
| 4 | 2 | 2 | 2 | 4 | 2 | 2 | 2 | 2 |
| 4 | 2 | 2 | 2 | 4 | 2 | 4 | 4 | 2 |
| 1 | 1 | 4 | 1 | 4 | 4 | 4 | 4 | 4 |
| 2 | 2 | 4 | 2 | 4 | 4 | 4 | 4 | 4 |
| 5 | 3 | 5 | 1 | 5 | 5 | 5 | 5 | 5 |
| 3 | 2 | 5 | 1 | 5 | 5 | 5 | 5 | 5 |
| 5 | 5 | 1 | 1 | 4 | 1 | 1 | 1 | 1 |
| 3 | 3 | 3 | 3 | 3 | 3 | 3 | 3 | 3 |
| 3 | 3 | 2 | 3 | 4 | 3 | 4 | 4 | 4 |
| 5 | 5 | 5 | 1 | 5 | 5 | 4 | 5 | 4 |
| 3 | 3 | 3 | 3 | 5 | 5 | 3 | 3 | 3 |
| 4 | 3 | 3 | 3 | 4 | 3 | 3 | 3 | 3 |
| 3 | 2 | 3 | 1 | 5 | 5 | 3 | 4 | 4 |
| 2 | 4 | 4 | 2 | 4 | 4 | 4 | 4 | 4 |
| 5 | 2 | 1 | 4 | 4 | 1 | 1 | 1 | 1 |
| 3 | 3 | 3 | 2 | 4 | 3 | 4 | 4 | 3 |
| 4 | 4 | 2 | 2 | 5 | 3 | 3 | 4 | 3 |
| 1 | 5 | 5 | 1 | 5 | 5 | 5 | 5 | 5 |
| 1 | 1 | 2 | 1 | 5 | 5 | 5 | 5 | 5 |
| 2 | 2 | 4 | 2 | 4 | 5 | 5 | 5 | 3 |
| 1 | 5 | 5 | 1 | 5 | 5 | 5 | 5 | 5 |
| 2 | 2 | 5 | 5 | 5 | 5 | 5 | 4 | 5 |
| 2 | 4 | 4 | 2 | 4 | 4 | 4 | 4 | 4 |
| 3 | 3 | 5 | 2 | 5 | 5 | 5 | 5 | 5 |
| 2 | 2 | 4 | 2 | 4 | 4 | 4 | 4 | 4 |
| 5 | 5 | 5 | 5 | 5 | 5 | 5 | 5 | 5 |
| 1 | 2 | 3 | 3 | 3 | 3 | 5 | 5 | 5 |
| 3 | 3 | 4 | 1 | 4 | 4 | 3 | 4 | 5 |
| 4 | 3 | 3 | 2 | 4 | 4 | 4 | 4 | 4 |
| 2 | 4 | 4 | 1 | 4 | 4 | 4 | 5 | 4 |
| 5 | 2 | 3 | 1 | 5 | 5 | 3 | 4 | 5 |
| 5 | 1 | 1 | 1 | 5 | 3 | 3 | 3 | 5 |
| 3 | 3 | 3 | 2 | 3 | 4 | 4 | 4 | 3 |
| 4 | 2 | 4 | 2 | 4 | 4 | 2 | 2 | 3 |
| 3 | 3 | 4 | 2 | 4 | 5 | 5 | 4 | 4 |
| 4 | 3 | 3 | 3 | 3 | 3 | 3 | 3 | 2 |
| 2 | 2 | 3 | 2 | 4 | 4 | 3 | 3 | 4 |
| 2 | 4 | 4 | 2 | 4 | 4 | 4 | 4 | 4 |
| 2 | 4 | 4 | 1 | 5 | 5 | 4 | 5 | 5 |

|   |   |   |   |   |   |   |   |   |
|---|---|---|---|---|---|---|---|---|
| 1 | 5 | 5 | 1 | 5 | 5 | 5 | 5 | 5 |
| 3 | 2 | 3 | 1 | 5 | 5 | 5 | 5 | 5 |
| 2 | 3 | 3 | 2 | 3 | 4 | 3 | 5 | 4 |
| 2 | 2 | 3 | 1 | 4 | 4 | 4 | 4 | 4 |
| 4 | 2 | 2 | 1 | 4 | 5 | 3 | 2 | 2 |
| 1 | 5 | 5 | 1 | 4 | 4 | 4 | 4 | 5 |
| 4 | 3 | 3 | 1 | 4 | 3 | 2 | 4 | 2 |
| 1 | 5 | 5 | 1 | 5 | 1 | 5 | 5 | 4 |
| 5 | 5 | 5 | 5 | 5 | 5 | 5 | 5 | 5 |
| 2 | 1 | 3 | 1 | 5 | 4 | 4 | 4 | 4 |
| 2 | 2 | 4 | 1 | 4 | 4 | 4 | 3 | 4 |
| 5 | 3 | 4 | 3 | 3 | 3 | 3 | 2 | 2 |
| 1 | 1 | 5 | 1 | 5 | 5 | 5 | 5 | 5 |
| 3 | 3 | 3 | 3 | 3 | 3 | 3 | 3 | 3 |
| 2 | 2 | 2 | 1 | 4 | 4 | 4 | 3 | 3 |
| 3 | 4 | 5 | 2 | 4 | 4 | 4 | 5 | 3 |
| 1 | 3 | 3 | 2 | 3 | 5 | 4 | 5 | 4 |
| 1 | 1 | 1 | 1 | 1 | 2 | 4 | 4 | 3 |
| 2 | 2 | 2 | 3 | 2 | 2 | 3 | 1 | 1 |
| 3 | 3 | 4 | 2 | 4 | 4 | 4 | 3 | 3 |
| 2 | 2 | 3 | 2 | 3 | 4 | 3 | 3 | 4 |
| 2 | 4 | 4 | 2 | 4 | 5 | 4 | 4 | 4 |
| 1 | 3 | 4 | 1 | 5 | 4 | 5 | 3 | 5 |
| 1 | 1 | 4 | 1 | 4 | 5 | 4 | 4 | 3 |
| 3 | 3 | 3 | 3 | 3 | 3 | 3 | 3 | 3 |
| 1 | 3 | 5 | 1 | 5 | 5 | 5 | 5 | 3 |
| 2 | 4 | 3 | 1 | 5 | 5 | 4 | 5 | 5 |
| 4 | 4 | 2 | 2 | 4 | 2 | 2 | 4 | 4 |
| 3 | 5 | 3 | 1 | 5 | 4 | 4 | 4 | 3 |
| 2 | 2 | 4 | 2 | 4 | 4 | 4 | 4 | 4 |
| 3 | 3 | 3 | 3 | 3 | 3 | 3 | 3 | 3 |
| 1 | 2 | 5 | 2 | 5 | 5 | 4 | 5 | 5 |
| 4 | 2 | 4 | 2 | 4 | 4 | 4 | 4 | 4 |
| 2 | 3 | 4 | 1 | 5 | 5 | 5 | 4 | 5 |
| 5 | 2 | 2 | 1 | 4 | 1 | 2 | 2 | 2 |
| 3 | 3 | 3 | 2 | 3 | 3 | 2 | 2 | 2 |
| 4 | 3 | 2 | 3 | 4 | 5 | 3 | 3 | 2 |
| 1 | 1 | 5 | 1 | 5 | 5 | 5 | 5 | 5 |
| 2 | 2 | 4 | 2 | 2 | 4 | 4 | 4 | 4 |
| 2 | 3 | 4 | 1 | 4 | 5 | 3 | 4 | 4 |
| 3 | 2 | 2 | 2 | 4 | 4 | 4 | 3 | 4 |
| 1 | 1 | 5 | 1 | 5 | 5 | 1 | 5 | 5 |
| 5 | 3 | 5 | 1 | 5 | 5 | 5 | 5 | 5 |
| 2 | 4 | 5 | 1 | 5 | 5 | 5 | 5 | 5 |
| 3 | 3 | 3 | 3 | 3 | 3 | 3 | 3 | 3 |
| 2 | 4 | 3 | 2 | 4 | 4 | 3 | 4 | 4 |
| 1 | 3 | 4 | 1 | 4 | 5 | 4 | 3 | 4 |
| 3 | 2 | 3 | 1 | 5 | 5 | 4 | 3 | 2 |
| 4 | 3 | 2 | 2 | 4 | 3 | 2 | 2 | 2 |
| 2 | 1 | 5 | 1 | 5 | 5 | 5 | 5 | 4 |
| 3 | 3 | 4 | 2 | 4 | 4 | 4 | 4 | 4 |
| 2 | 3 | 5 | 1 | 5 | 5 | 4 | 4 | 4 |
| 1 | 5 | 5 | 1 | 5 | 5 | 5 | 5 | 5 |
| 2 | 4 | 2 | 3 | 4 | 5 | 3 | 4 | 2 |

|   |   |   |   |   |   |   |   |   |
|---|---|---|---|---|---|---|---|---|
| 3 | 3 | 3 | 3 | 3 | 3 | 3 | 3 | 3 |
| 2 | 2 | 4 | 2 | 4 | 5 | 4 | 3 | 3 |
| 1 | 2 | 5 | 2 | 4 | 4 | 4 | 4 | 4 |
| 3 | 3 | 3 | 3 | 3 | 3 | 3 | 3 | 3 |
| 3 | 4 | 3 | 5 | 3 | 2 | 2 | 5 | 5 |
| 1 | 1 | 5 | 1 | 5 | 5 | 4 | 5 | 4 |
| 5 | 5 | 5 | 5 | 5 | 5 | 5 | 5 | 5 |
| 2 | 2 | 3 | 2 | 2 | 2 | 2 | 2 | 2 |
| 2 | 4 | 4 | 2 | 5 | 5 | 5 | 4 | 4 |
| 1 | 5 | 5 | 1 | 5 | 5 | 5 | 5 | 5 |
| 1 | 5 | 5 | 1 | 5 | 5 | 5 | 5 | 5 |
| 4 | 3 | 4 | 2 | 4 | 4 | 4 | 3 | 3 |
| 1 | 2 | 5 | 1 | 5 | 5 | 5 | 5 | 5 |
| 5 | 1 | 1 | 5 | 1 | 5 | 1 | 1 | 5 |
| 3 | 2 | 4 | 1 | 5 | 3 | 3 | 4 | 3 |
| 4 | 5 | 4 | 2 | 5 | 5 | 2 | 4 | 4 |
| 3 | 2 | 4 | 1 | 5 | 3 | 4 | 4 | 3 |
| 2 | 2 | 5 | 1 | 5 | 5 | 5 | 5 | 5 |
| 3 | 3 | 4 | 2 | 4 | 4 | 4 | 4 | 4 |
| 3 | 4 | 4 | 2 | 3 | 3 | 3 | 4 | 3 |
| 3 | 2 | 4 | 2 | 5 | 4 | 4 | 3 | 4 |
| 3 | 3 | 4 | 3 | 3 | 3 | 3 | 3 | 4 |
| 1 | 1 | 5 | 1 | 5 | 4 | 4 | 5 | 5 |
| 1 | 5 | 5 | 1 | 5 | 5 | 4 | 5 | 5 |
| 2 | 2 | 2 | 2 | 3 | 3 | 3 | 3 | 3 |
| 4 | 3 | 3 | 2 | 4 | 4 | 4 | 3 | 2 |
| 4 | 5 | 3 | 5 | 4 | 2 | 2 | 3 | 3 |
| 4 | 3 | 2 | 2 | 4 | 2 | 2 | 3 | 2 |
| 2 | 3 | 4 | 1 | 4 | 4 | 3 | 3 | 3 |
| 4 | 3 | 2 | 3 | 4 | 4 | 3 | 3 | 4 |
| 2 | 2 | 4 | 2 | 4 | 4 | 4 | 4 | 4 |
| 3 | 4 | 4 | 3 | 3 | 3 | 4 | 3 | 3 |
| 4 | 4 | 4 | 2 | 4 | 4 | 4 | 4 | 4 |
| 4 | 3 | 2 | 2 | 4 | 3 | 3 | 3 | 2 |
| 3 | 3 | 3 | 3 | 3 | 3 | 3 | 3 | 3 |
| 4 | 4 | 2 | 2 | 4 | 4 | 5 | 4 | 4 |
| 4 | 3 | 2 | 2 | 4 | 2 | 2 | 2 | 2 |
| 3 | 4 | 3 | 2 | 5 | 3 | 4 | 4 | 3 |
| 4 | 3 | 3 | 2 | 5 | 4 | 4 | 4 | 4 |
| 3 | 2 | 2 | 2 | 4 | 4 | 3 | 3 | 3 |
| 5 | 3 | 3 | 2 | 5 | 3 | 2 | 2 | 2 |
| 3 | 3 | 5 | 2 | 5 | 5 | 4 | 4 | 4 |
| 3 | 4 | 4 | 1 | 5 | 4 | 4 | 4 | 3 |
| 5 | 4 | 3 | 3 | 2 | 2 | 3 | 3 | 1 |
| 4 | 3 | 2 | 3 | 3 | 3 | 2 | 3 | 3 |
| 1 | 5 | 5 | 1 | 5 | 5 | 5 | 5 | 5 |
| 5 | 4 | 2 | 3 | 4 | 3 | 2 | 3 | 2 |
| 2 | 4 | 4 | 2 | 4 | 4 | 4 | 4 | 4 |
| 3 | 2 | 4 | 2 | 4 | 4 | 4 | 4 | 4 |
| 3 | 4 | 3 | 1 | 5 | 4 | 2 | 2 | 4 |
| 3 | 3 | 4 | 2 | 4 | 4 | 3 | 3 | 3 |
| 3 | 2 | 4 | 2 | 4 | 4 | 4 | 4 | 4 |
| 3 | 3 | 3 | 3 | 3 | 3 | 3 | 3 | 3 |
| 3 | 4 | 3 | 2 | 4 | 4 | 3 | 4 | 3 |



|   |   |   |   |   |   |   |   |   |
|---|---|---|---|---|---|---|---|---|
| 4 | 2 | 2 | 1 | 5 | 4 | 4 | 3 | 4 |
| 4 | 2 | 2 | 2 | 4 | 3 | 3 | 3 | 3 |
| 2 | 1 | 2 | 2 | 3 | 3 | 3 | 3 | 3 |
| 3 | 3 | 4 | 2 | 2 | 4 | 4 | 4 | 4 |
| 4 | 4 | 2 | 3 | 4 | 2 | 2 | 2 | 2 |
| 5 | 1 | 1 | 1 | 5 | 1 | 1 | 1 | 5 |
| 3 | 3 | 1 | 1 | 2 | 3 | 4 | 2 | 2 |
| 3 | 2 | 1 | 4 | 4 | 2 | 2 | 2 | 2 |
| 3 | 2 | 4 | 1 | 5 | 5 | 5 | 4 | 5 |
| 2 | 2 | 5 | 2 | 5 | 5 | 5 | 5 | 5 |
| 4 | 2 | 4 | 2 | 4 | 4 | 2 | 4 | 4 |
| 1 | 1 | 1 | 1 | 1 | 1 | 1 | 1 | 1 |
| 2 | 3 | 5 | 2 | 3 | 5 | 4 | 2 | 5 |
| 4 | 3 | 2 | 3 | 4 | 4 | 3 | 2 | 2 |
| 2 | 4 | 4 | 1 | 5 | 4 | 4 | 2 | 4 |
| 3 | 2 | 3 | 3 | 3 | 3 | 2 | 2 | 4 |
| 3 | 3 | 3 | 2 | 4 | 4 | 4 | 4 | 4 |
| 4 | 1 | 1 | 3 | 2 | 1 | 2 | 3 | 3 |
| 4 | 2 | 2 | 2 | 4 | 4 | 4 | 4 | 2 |
| 5 | 1 | 2 | 3 | 4 | 1 | 2 | 2 | 4 |
| 2 | 2 | 4 | 4 | 5 | 5 | 5 | 5 | 5 |
| 3 | 2 | 3 | 3 | 3 | 3 | 3 | 3 | 3 |
| 3 | 3 | 2 | 3 | 4 | 3 | 4 | 4 | 4 |
| 3 | 4 | 3 | 2 | 4 | 4 | 4 | 4 | 4 |
| 2 | 4 | 4 | 3 | 4 | 4 | 4 | 4 | 4 |
| 5 | 1 | 1 | 3 | 4 | 4 | 3 | 4 | 3 |
| 4 | 2 | 2 | 2 | 3 | 3 | 3 | 3 | 2 |
| 5 | 1 | 1 | 1 | 2 | 1 | 1 | 1 | 1 |
| 4 | 4 | 2 | 2 | 4 | 2 | 2 | 4 | 2 |
| 4 | 2 | 2 | 2 | 4 | 4 | 4 | 4 | 2 |
| 3 | 3 | 2 | 4 | 4 | 4 | 3 | 4 | 4 |
| 3 | 4 | 3 | 2 | 4 | 4 | 3 | 4 | 3 |
| 3 | 2 | 2 | 2 | 4 | 4 | 4 | 4 | 3 |
| 1 | 1 | 5 | 1 | 5 | 5 | 5 | 5 | 5 |
| 4 | 4 | 2 | 2 | 4 | 4 | 4 | 3 | 3 |
| 2 | 2 | 4 | 1 | 4 | 4 | 3 | 2 | 4 |
| 3 | 2 | 2 | 2 | 4 | 4 | 4 | 4 | 4 |
| 5 | 4 | 2 | 2 | 2 | 2 | 4 | 4 | 2 |
| 4 | 2 | 2 | 2 | 4 | 2 | 2 | 2 | 2 |
| 5 | 4 | 2 | 2 | 4 | 2 | 2 | 2 | 2 |
| 1 | 4 | 5 | 1 | 5 | 5 | 5 | 5 | 5 |
| 3 | 3 | 4 | 2 | 4 | 3 | 4 | 4 | 3 |
| 4 | 4 | 4 | 4 | 4 | 4 | 4 | 4 | 4 |
| 4 | 3 | 3 | 2 | 3 | 3 | 3 | 4 | 3 |
| 3 | 3 | 3 | 1 | 4 | 4 | 4 | 4 | 3 |
| 4 | 2 | 2 | 2 | 4 | 4 | 2 | 2 | 2 |
| 4 | 4 | 3 | 2 | 5 | 3 | 3 | 4 | 3 |
| 3 | 2 | 2 | 2 | 4 | 3 | 2 | 4 | 2 |
| 5 | 2 | 3 | 4 | 4 | 2 | 2 | 4 | 5 |
| 4 | 2 | 2 | 2 | 4 | 2 | 4 | 4 | 2 |
| 2 | 3 | 3 | 2 | 5 | 5 | 5 | 5 | 4 |
| 3 | 5 | 4 | 1 | 5 | 4 | 5 | 5 | 5 |
| 4 | 3 | 3 | 1 | 4 | 4 | 4 | 4 | 3 |
| 4 | 1 | 4 | 1 | 5 | 4 | 4 | 5 | 2 |

|   |   |   |   |   |   |   |   |   |
|---|---|---|---|---|---|---|---|---|
| 3 | 3 | 2 | 2 | 3 | 2 | 2 | 2 | 3 |
| 2 | 4 | 4 | 2 | 4 | 4 | 4 | 4 | 3 |
| 3 | 3 | 4 | 2 | 4 | 4 | 3 | 3 | 4 |
| 4 | 3 | 3 | 3 | 4 | 4 | 4 | 4 | 3 |
| 2 | 2 | 2 | 3 | 4 | 4 | 2 | 4 | 3 |
| 4 | 3 | 3 | 2 | 3 | 4 | 4 | 4 | 3 |
| 2 | 3 | 2 | 3 | 2 | 2 | 3 | 2 | 2 |
| 2 | 2 | 4 | 1 | 5 | 5 | 4 | 5 | 5 |
| 2 | 2 | 5 | 1 | 5 | 5 | 4 | 5 | 5 |
| 1 | 1 | 4 | 1 | 5 | 4 | 4 | 4 | 4 |
| 1 | 1 | 4 | 1 | 5 | 5 | 5 | 5 | 5 |
| 3 | 2 | 4 | 2 | 5 | 4 | 4 | 4 | 5 |
| 3 | 1 | 4 | 1 | 4 | 3 | 4 | 3 | 4 |
| 3 | 2 | 4 | 2 | 4 | 4 | 3 | 3 | 4 |
| 2 | 1 | 5 | 1 | 5 | 5 | 5 | 5 | 5 |
| 4 | 3 | 4 | 2 | 4 | 4 | 4 | 2 | 3 |
| 1 | 1 | 5 | 1 | 5 | 5 | 5 | 5 | 5 |
| 2 | 1 | 3 | 2 | 4 | 2 | 2 | 3 | 4 |
| 4 | 3 | 2 | 2 | 4 | 5 | 4 | 3 | 3 |
| 5 | 1 | 1 | 2 | 5 | 2 | 2 | 2 | 1 |
| 2 | 2 | 3 | 1 | 4 | 5 | 5 | 5 | 2 |
| 4 | 2 | 3 | 2 | 4 | 3 | 3 | 3 | 3 |
| 1 | 1 | 5 | 1 | 5 | 5 | 5 | 5 | 5 |
| 1 | 1 | 5 | 1 | 5 | 5 | 5 | 5 | 5 |
| 2 | 3 | 5 | 1 | 5 | 5 | 5 | 5 | 5 |
| 4 | 2 | 1 | 2 | 4 | 4 | 2 | 1 | 1 |
| 2 | 2 | 4 | 1 | 5 | 5 | 5 | 5 | 5 |
| 1 | 5 | 4 | 1 | 5 | 5 | 5 | 5 | 4 |
| 4 | 4 | 4 | 2 | 4 | 4 | 5 | 4 | 3 |
| 1 | 1 | 5 | 1 | 5 | 5 | 5 | 5 | 5 |
| 1 | 1 | 4 | 2 | 5 | 4 | 2 | 5 | 5 |
| 3 | 1 | 4 | 1 | 5 | 3 | 4 | 2 | 3 |
| 4 | 2 | 2 | 3 | 3 | 3 | 3 | 4 | 2 |
| 1 | 1 | 5 | 1 | 5 | 5 | 5 | 5 | 5 |
| 2 | 4 | 3 | 1 | 5 | 5 | 4 | 3 | 3 |
| 2 | 3 | 2 | 2 | 5 | 4 | 4 | 4 | 4 |
| 3 | 4 | 2 | 2 | 4 | 4 | 4 | 3 | 3 |
| 5 | 1 | 1 | 4 | 2 | 2 | 2 | 1 | 1 |
| 3 | 3 | 3 | 3 | 3 | 3 | 3 | 3 | 3 |
| 4 | 5 | 4 | 1 | 5 | 5 | 4 | 4 | 4 |
| 1 | 1 | 4 | 1 | 5 | 5 | 5 | 5 | 5 |
| 4 | 3 | 4 | 3 | 4 | 3 | 4 | 4 | 3 |
| 3 | 3 | 3 | 3 | 3 | 3 | 3 | 3 | 3 |
| 3 | 3 | 3 | 2 | 4 | 4 | 4 | 4 | 3 |
| 4 | 3 | 2 | 2 | 3 | 2 | 3 | 3 | 3 |
| 4 | 4 | 4 | 1 | 4 | 2 | 3 | 3 | 3 |
| 2 | 2 | 4 | 1 | 4 | 4 | 3 | 4 | 3 |
| 3 | 3 | 3 | 2 | 4 | 4 | 4 | 3 | 3 |
| 4 | 2 | 4 | 2 | 4 | 4 | 4 | 4 | 5 |
| 3 | 2 | 3 | 1 | 5 | 4 | 4 | 4 | 4 |
| 3 | 1 | 3 | 1 | 5 | 5 | 4 | 3 | 2 |
| 2 | 1 | 2 | 1 | 5 | 5 | 5 | 5 | 4 |
| 4 | 1 | 3 | 1 | 3 | 3 | 4 | 4 | 4 |
| 1 | 3 | 5 | 1 | 5 | 5 | 5 | 5 | 4 |

|   |   |   |   |   |   |   |   |   |
|---|---|---|---|---|---|---|---|---|
| 5 | 2 | 2 | 2 | 4 | 4 | 3 | 4 | 4 |
| 2 | 4 | 4 | 2 | 5 | 5 | 5 | 5 | 5 |
| 3 | 1 | 4 | 1 | 4 | 5 | 4 | 4 | 3 |
| 5 | 1 | 1 | 5 | 1 | 1 | 1 | 1 | 1 |
| 4 | 2 | 3 | 1 | 5 | 5 | 3 | 3 | 2 |
| 4 | 3 | 2 | 1 | 4 | 3 | 2 | 2 | 2 |
| 3 | 2 | 2 | 3 | 4 | 3 | 3 | 3 | 3 |
| 4 | 1 | 4 | 1 | 5 | 4 | 4 | 4 | 3 |
| 2 | 4 | 4 | 2 | 4 | 5 | 4 | 4 | 4 |
| 4 | 4 | 1 | 1 | 3 | 2 | 3 | 2 | 2 |
| 3 | 3 | 4 | 2 | 5 | 5 | 4 | 4 | 4 |
| 3 | 1 | 1 | 2 | 4 | 3 | 3 | 1 | 3 |
| 3 | 3 | 3 | 2 | 4 | 3 | 3 | 4 | 4 |
| 2 | 4 | 5 | 1 | 5 | 5 | 5 | 5 | 5 |
| 1 | 4 | 5 | 1 | 5 | 5 | 5 | 5 | 4 |
| 4 | 3 | 3 | 3 | 4 | 3 | 3 | 3 | 2 |
| 4 | 3 | 2 | 1 | 4 | 4 | 4 | 4 | 4 |
| 1 | 3 | 4 | 2 | 5 | 5 | 4 | 5 | 5 |
| 2 | 4 | 4 | 2 | 4 | 4 | 4 | 4 | 4 |
| 3 | 3 | 3 | 2 | 4 | 2 | 3 | 4 | 3 |
| 4 | 3 | 3 | 1 | 3 | 3 | 3 | 3 | 3 |
| 4 | 4 | 1 | 3 | 2 | 2 | 2 | 2 | 2 |
| 5 | 5 | 5 | 5 | 5 | 5 | 5 | 5 | 5 |
| 5 | 3 | 4 | 1 | 1 | 1 | 1 | 1 | 5 |
| 5 | 5 | 3 | 1 | 5 | 4 | 4 | 3 | 1 |
| 4 | 3 | 3 | 2 | 3 | 3 | 3 | 3 | 3 |
| 3 | 2 | 3 | 3 | 3 | 3 | 3 | 2 | 3 |
| 1 | 3 | 4 | 1 | 5 | 4 | 4 | 4 | 4 |
| 3 | 3 | 3 | 3 | 3 | 3 | 3 | 3 | 3 |
| 3 | 2 | 4 | 2 | 4 | 4 | 4 | 4 | 4 |
| 4 | 3 | 3 | 3 | 4 | 3 | 3 | 3 | 3 |
| 4 | 2 | 2 | 3 | 3 | 2 | 3 | 3 | 2 |
| 5 | 3 | 3 | 2 | 4 | 3 | 2 | 2 | 1 |
| 3 | 3 | 3 | 1 | 5 | 3 | 3 | 3 | 3 |
| 4 | 4 | 3 | 2 | 4 | 4 | 3 | 3 | 3 |
| 2 | 3 | 4 | 2 | 3 | 4 | 4 | 4 | 4 |
| 3 | 3 | 4 | 2 | 5 | 5 | 5 | 4 | 4 |
| 1 | 3 | 4 | 1 | 5 | 4 | 4 | 3 | 4 |
| 3 | 3 | 2 | 2 | 4 | 4 | 3 | 3 | 3 |
| 3 | 3 | 3 | 3 | 3 | 3 | 3 | 3 | 3 |
| 4 | 1 | 2 | 1 | 4 | 4 | 4 | 4 | 3 |
| 4 | 1 | 4 | 1 | 5 | 5 | 4 | 3 | 4 |
| 4 | 4 | 2 | 2 | 4 | 3 | 2 | 3 | 3 |
| 2 | 2 | 3 | 2 | 5 | 5 | 5 | 4 | 4 |
| 3 | 3 | 2 | 3 | 4 | 3 | 3 | 3 | 3 |
| 5 | 4 | 2 | 2 | 4 | 5 | 2 | 4 | 2 |
| 2 | 2 | 4 | 1 | 5 | 5 | 5 | 5 | 5 |
| 1 | 2 | 3 | 1 | 5 | 5 | 4 | 3 | 4 |
| 2 | 2 | 4 | 1 | 4 | 5 | 4 | 4 | 4 |
| 1 | 1 | 4 | 1 | 4 | 4 | 4 | 4 | 5 |
| 2 | 2 | 3 | 1 | 4 | 4 | 4 | 4 | 4 |
| 4 | 4 | 3 | 1 | 5 | 4 | 4 | 4 | 4 |
| 3 | 2 | 5 | 1 | 5 | 5 | 5 | 5 | 5 |
| 3 | 2 | 3 | 1 | 4 | 5 | 4 | 5 | 4 |

|   |   |   |   |   |   |   |   |   |
|---|---|---|---|---|---|---|---|---|
| 3 | 2 | 3 | 2 | 5 | 3 | 3 | 4 | 4 |
| 2 | 4 | 4 | 2 | 4 | 4 | 4 | 4 | 4 |
| 2 | 4 | 3 | 2 | 4 | 4 | 3 | 4 | 4 |
| 5 | 5 | 5 | 1 | 5 | 5 | 5 | 5 | 5 |
| 1 | 2 | 4 | 2 | 5 | 5 | 5 | 5 | 5 |
| 3 | 2 | 3 | 1 | 4 | 5 | 4 | 5 | 4 |

| C24 | C25 | C26 | C27 | C28 | C29 | C30 | C31 | C32 |
|-----|-----|-----|-----|-----|-----|-----|-----|-----|
| 5   | 5   | 5   | 5   | 5   | 5   | 5   | 5   | 4   |
| 1   | 5   | 4   | 4   | 1   | 1   | 2   | 5   | 4   |
| 5   | 5   | 5   | 5   | 5   | 5   | 5   | 5   | 5   |
| 5   | 5   | 5   | 5   | 5   | 5   | 5   | 5   | 5   |
| 3   | 3   | 3   | 3   | 3   | 3   | 3   | 3   | 3   |
| 5   | 5   | 5   | 5   | 5   | 5   | 5   | 5   | 5   |
| 5   | 2   | 4   | 4   | 5   | 5   | 5   | 5   | 5   |
| 2   | 4   | 4   | 4   | 2   | 2   | 4   | 4   | 2   |
| 3   | 3   | 3   | 3   | 3   | 3   | 4   | 4   | 4   |
| 4   | 5   | 5   | 5   | 4   | 4   | 5   | 1   | 4   |
| 4   | 2   | 5   | 5   | 2   | 4   | 5   | 4   | 5   |
| 3   | 3   | 4   | 3   | 4   | 3   | 4   | 4   | 2   |
| 4   | 1   | 5   | 5   | 3   | 5   | 5   | 1   | 5   |
| 5   | 5   | 5   | 5   | 5   | 5   | 5   | 5   | 5   |
| 5   | 5   | 5   | 5   | 1   | 5   | 3   | 5   | 5   |
| 5   | 5   | 5   | 5   | 5   | 5   | 5   | 5   | 5   |
| 2   | 2   | 4   | 5   | 2   | 3   | 3   | 2   | 3   |
| 5   | 5   | 5   | 5   | 5   | 5   | 5   | 5   | 5   |
| 5   | 2   | 4   | 4   | 3   | 4   | 3   | 3   | 2   |
| 1   | 4   | 5   | 5   | 2   | 3   | 2   | 3   | 1   |
| 2   | 3   | 3   | 5   | 5   | 5   | 5   | 5   | 5   |
| 5   | 5   | 5   | 5   | 5   | 5   | 5   | 5   | 5   |
| 4   | 1   | 5   | 5   | 4   | 5   | 5   | 1   | 5   |
| 1   | 1   | 5   | 5   | 3   | 5   | 5   | 1   | 1   |
| 2   | 4   | 4   | 4   | 4   | 2   | 3   | 4   | 4   |
| 2   | 2   | 3   | 4   | 3   | 4   | 3   | 2   | 3   |
| 1   | 3   | 3   | 3   | 2   | 2   | 3   | 3   | 3   |
| 3   | 2   | 4   | 4   | 3   | 4   | 4   | 4   | 4   |
| 2   | 1   | 4   | 3   | 2   | 5   | 5   | 2   | 4   |
| 3   | 3   | 4   | 5   | 4   | 2   | 3   | 2   | 2   |
| 3   | 1   | 5   | 5   | 4   | 5   | 5   | 1   | 5   |
| 1   | 1   | 5   | 5   | 5   | 5   | 5   | 1   | 4   |
| 2   | 1   | 5   | 4   | 4   | 4   | 4   | 2   | 4   |
| 5   | 1   | 4   | 5   | 5   | 5   | 5   | 5   | 5   |
| 2   | 2   | 5   | 4   | 3   | 2   | 4   | 5   | 5   |
| 2   | 1   | 4   | 4   | 4   | 3   | 5   | 4   | 4   |
| 1   | 1   | 5   | 5   | 5   | 5   | 5   | 5   | 5   |
| 5   | 5   | 5   | 5   | 5   | 5   | 5   | 5   | 5   |
| 3   | 1   | 5   | 5   | 4   | 4   | 4   | 4   | 4   |
| 5   | 1   | 5   | 5   | 5   | 5   | 5   | 5   | 5   |
| 4   | 1   | 4   | 4   | 4   | 4   | 4   | 1   | 4   |
| 3   | 4   | 4   | 4   | 4   | 4   | 4   | 4   | 4   |
| 3   | 1   | 5   | 5   | 5   | 5   | 5   | 2   | 5   |
| 2   | 1   | 5   | 5   | 3   | 5   | 4   | 2   | 2   |
| 4   | 2   | 4   | 4   | 4   | 3   | 4   | 2   | 4   |
| 4   | 4   | 4   | 4   | 4   | 4   | 4   | 4   | 4   |
| 2   | 2   | 4   | 5   | 5   | 5   | 5   | 2   | 3   |
| 5   | 5   | 5   | 5   | 5   | 5   | 5   | 5   | 5   |
| 2   | 3   | 2   | 2   | 3   | 2   | 2   | 2   | 2   |
| 5   | 1   | 5   | 5   | 4   | 1   | 5   | 4   | 3   |
| 5   | 5   | 5   | 5   | 5   | 5   | 5   | 5   | 5   |
| 5   | 1   | 5   | 5   | 5   | 5   | 5   | 3   | 5   |
| 3   | 3   | 4   | 4   | 5   | 4   | 3   | 3   | 4   |

|   |   |   |   |   |   |   |   |   |
|---|---|---|---|---|---|---|---|---|
| 2 | 3 | 3 | 3 | 3 | 3 | 3 | 3 | 3 |
| 4 | 2 | 4 | 4 | 3 | 3 | 3 | 3 | 4 |
| 5 | 5 | 5 | 5 | 5 | 5 | 5 | 5 | 5 |
| 5 | 5 | 5 | 5 | 5 | 5 | 5 | 5 | 5 |
| 1 | 4 | 5 | 5 | 5 | 5 | 5 | 5 | 5 |
| 3 | 1 | 4 | 4 | 3 | 4 | 4 | 2 | 5 |
| 5 | 1 | 5 | 5 | 5 | 5 | 5 | 1 | 5 |
| 5 | 5 | 5 | 5 | 5 | 5 | 5 | 1 | 5 |
| 2 | 4 | 4 | 4 | 4 | 4 | 4 | 4 | 4 |
| 5 | 3 | 4 | 4 | 3 | 3 | 4 | 4 | 5 |
| 2 | 2 | 4 | 4 | 3 | 3 | 4 | 2 | 3 |
| 4 | 2 | 5 | 5 | 3 | 3 | 4 | 2 | 5 |
| 5 | 1 | 5 | 5 | 3 | 5 | 5 | 2 | 5 |
| 4 | 5 | 5 | 5 | 4 | 3 | 4 | 3 | 2 |
| 5 | 2 | 5 | 5 | 4 | 4 | 4 | 2 | 4 |
| 3 | 1 | 5 | 5 | 4 | 4 | 5 | 1 | 5 |
| 1 | 1 | 5 | 5 | 3 | 5 | 5 | 1 | 5 |
| 1 | 3 | 4 | 5 | 3 | 5 | 5 | 1 | 5 |
| 4 | 2 | 5 | 5 | 2 | 3 | 4 | 3 | 5 |
| 4 | 3 | 5 | 5 | 3 | 3 | 3 | 3 | 4 |
| 4 | 4 | 3 | 4 | 4 | 4 | 4 | 3 | 4 |
| 4 | 3 | 5 | 5 | 3 | 5 | 5 | 2 | 4 |
| 3 | 3 | 5 | 5 | 5 | 5 | 5 | 5 | 5 |
| 3 | 3 | 3 | 3 | 3 | 3 | 3 | 3 | 3 |
| 3 | 3 | 3 | 3 | 3 | 3 | 3 | 3 | 3 |
| 1 | 4 | 3 | 4 | 2 | 1 | 2 | 5 | 4 |
| 3 | 1 | 5 | 4 | 3 | 4 | 4 | 2 | 5 |
| 1 | 3 | 3 | 3 | 3 | 3 | 3 | 3 | 4 |
| 3 | 1 | 4 | 4 | 3 | 3 | 2 | 4 | 4 |
| 1 | 3 | 4 | 5 | 2 | 3 | 3 | 4 | 4 |
| 3 | 4 | 3 | 3 | 3 | 3 | 3 | 4 | 3 |
| 3 | 2 | 5 | 3 | 2 | 2 | 2 | 3 | 1 |
| 1 | 1 | 5 | 5 | 5 | 5 | 5 | 1 | 2 |
| 2 | 2 | 3 | 3 | 3 | 3 | 3 | 3 | 2 |
| 1 | 1 | 5 | 3 | 3 | 4 | 4 | 2 | 1 |
| 5 | 5 | 5 | 5 | 5 | 5 | 5 | 1 | 2 |
| 1 | 1 | 5 | 5 | 3 | 4 | 5 | 1 | 4 |
| 3 | 2 | 5 | 5 | 3 | 2 | 3 | 2 | 4 |
| 2 | 1 | 3 | 2 | 2 | 2 | 4 | 1 | 5 |
| 3 | 1 | 5 | 5 | 5 | 5 | 5 | 1 | 3 |
| 2 | 3 | 3 | 4 | 2 | 2 | 2 | 4 | 3 |
| 2 | 2 | 4 | 4 | 4 | 4 | 4 | 2 | 3 |
| 5 | 4 | 3 | 3 | 2 | 3 | 1 | 3 | 5 |
| 1 | 1 | 5 | 5 | 5 | 5 | 5 | 1 | 4 |
| 1 | 1 | 4 | 5 | 5 | 4 | 4 | 2 | 2 |
| 3 | 3 | 4 | 3 | 3 | 4 | 4 | 5 | 1 |
| 4 | 4 | 5 | 4 | 5 | 5 | 4 | 4 | 4 |
| 2 | 3 | 4 | 5 | 3 | 3 | 3 | 3 | 5 |
| 5 | 1 | 5 | 5 | 4 | 4 | 5 | 2 | 5 |
| 1 | 4 | 4 | 5 | 1 | 2 | 2 | 5 | 5 |
| 5 | 2 | 4 | 4 | 2 | 2 | 4 | 4 | 5 |
| 3 | 2 | 4 | 5 | 3 | 3 | 4 | 2 | 3 |
| 2 | 2 | 2 | 2 | 2 | 2 | 2 | 2 | 2 |
| 1 | 4 | 3 | 4 | 2 | 2 | 2 | 3 | 3 |

|   |   |   |   |   |   |   |   |   |
|---|---|---|---|---|---|---|---|---|
| 3 | 3 | 3 | 3 | 3 | 3 | 3 | 3 | 3 |
| 2 | 4 | 2 | 4 | 2 | 2 | 2 | 2 | 4 |
| 3 | 1 | 5 | 5 | 1 | 4 | 2 | 4 | 5 |
| 5 | 5 | 5 | 5 | 5 | 5 | 5 | 5 | 5 |
| 1 | 1 | 5 | 5 | 5 | 5 | 5 | 1 | 5 |
| 2 | 4 | 5 | 5 | 2 | 2 | 4 | 5 | 5 |
| 3 | 4 | 5 | 5 | 3 | 3 | 4 | 4 | 3 |
| 1 | 3 | 4 | 5 | 1 | 3 | 4 | 2 | 4 |
| 1 | 1 | 5 | 5 | 2 | 5 | 5 | 1 | 3 |
| 3 | 3 | 3 | 3 | 3 | 3 | 3 | 3 | 3 |
| 3 | 3 | 3 | 3 | 3 | 3 | 3 | 3 | 3 |
| 2 | 1 | 5 | 5 | 4 | 4 | 4 | 1 | 4 |
| 3 | 2 | 5 | 5 | 3 | 5 | 4 | 1 | 4 |
| 4 | 1 | 4 | 5 | 4 | 4 | 4 | 1 | 5 |
| 2 | 2 | 4 | 4 | 4 | 4 | 4 | 2 | 4 |
| 2 | 2 | 4 | 4 | 3 | 3 | 4 | 4 | 3 |
| 4 | 2 | 4 | 5 | 4 | 4 | 4 | 3 | 5 |
| 1 | 2 | 5 | 5 | 5 | 2 | 5 | 2 | 2 |
| 2 | 2 | 4 | 4 | 4 | 3 | 4 | 2 | 1 |
| 4 | 4 | 4 | 5 | 5 | 5 | 5 | 2 | 5 |
| 3 | 1 | 4 | 4 | 3 | 4 | 4 | 3 | 2 |
| 1 | 1 | 5 | 5 | 5 | 5 | 5 | 1 | 5 |
| 3 | 3 | 2 | 2 | 3 | 3 | 5 | 4 | 3 |
| 3 | 3 | 3 | 5 | 3 | 3 | 3 | 3 | 3 |
| 3 | 4 | 3 | 4 | 2 | 2 | 2 | 4 | 2 |
| 1 | 4 | 2 | 5 | 2 | 2 | 3 | 4 | 4 |
| 1 | 3 | 3 | 3 | 3 | 2 | 3 | 4 | 5 |
| 4 | 4 | 1 | 4 | 1 | 2 | 1 | 4 | 5 |
| 1 | 1 | 5 | 5 | 4 | 3 | 2 | 2 | 3 |
| 3 | 1 | 5 | 5 | 3 | 5 | 5 | 1 | 4 |
| 4 | 4 | 4 | 4 | 4 | 4 | 4 | 2 | 4 |
| 2 | 2 | 5 | 5 | 3 | 2 | 5 | 3 | 4 |
| 3 | 1 | 4 | 4 | 4 | 5 | 5 | 3 | 2 |
| 1 | 5 | 1 | 5 | 1 | 1 | 1 | 5 | 4 |
| 1 | 1 | 5 | 5 | 5 | 4 | 4 | 1 | 4 |
| 3 | 1 | 4 | 4 | 4 | 5 | 4 | 2 | 5 |
| 1 | 1 | 5 | 4 | 4 | 3 | 5 | 1 | 5 |
| 2 | 2 | 5 | 5 | 5 | 4 | 5 | 2 | 4 |
| 1 | 1 | 4 | 4 | 2 | 4 | 4 | 4 | 4 |
| 5 | 5 | 5 | 5 | 5 | 5 | 5 | 5 | 5 |
| 2 | 1 | 5 | 5 | 5 | 4 | 5 | 2 | 5 |
| 4 | 5 | 2 | 5 | 1 | 1 | 2 | 4 | 5 |
| 3 | 3 | 3 | 3 | 3 | 3 | 3 | 3 | 3 |
| 3 | 4 | 4 | 4 | 3 | 2 | 2 | 4 | 3 |
| 1 | 1 | 5 | 3 | 2 | 3 | 5 | 3 | 1 |
| 2 | 3 | 5 | 5 | 5 | 3 | 5 | 2 | 4 |
| 1 | 5 | 4 | 4 | 1 | 1 | 1 | 3 | 1 |
| 3 | 4 | 5 | 5 | 4 | 5 | 5 | 1 | 2 |
| 2 | 2 | 4 | 4 | 2 | 4 | 4 | 3 | 5 |
| 3 | 4 | 4 | 4 | 2 | 4 | 4 | 5 | 4 |
| 2 | 1 | 5 | 5 | 5 | 5 | 5 | 1 | 5 |
| 5 | 3 | 5 | 5 | 5 | 5 | 5 | 5 | 5 |
| 3 | 4 | 5 | 5 | 2 | 2 | 2 | 5 | 4 |
| 2 | 2 | 4 | 4 | 4 | 3 | 4 | 2 | 3 |

|   |   |   |   |   |   |   |   |   |
|---|---|---|---|---|---|---|---|---|
| 2 | 1 | 5 | 4 | 2 | 5 | 5 | 2 | 2 |
| 2 | 3 | 4 | 5 | 4 | 3 | 3 | 2 | 3 |
| 5 | 1 | 5 | 5 | 4 | 5 | 5 | 1 | 5 |
| 3 | 3 | 4 | 4 | 3 | 2 | 3 | 4 | 4 |
| 1 | 1 | 5 | 5 | 2 | 4 | 4 | 4 | 4 |
| 4 | 2 | 4 | 4 | 4 | 4 | 4 | 2 | 4 |
| 3 | 3 | 4 | 4 | 3 | 3 | 4 | 2 | 4 |
| 4 | 2 | 4 | 4 | 4 | 4 | 4 | 2 | 4 |
| 2 | 4 | 2 | 2 | 1 | 2 | 2 | 4 | 2 |
| 1 | 2 | 4 | 4 | 4 | 2 | 3 | 4 | 1 |
| 2 | 3 | 5 | 5 | 3 | 4 | 4 | 2 | 5 |
| 2 | 1 | 5 | 5 | 5 | 5 | 5 | 1 | 5 |
| 3 | 2 | 4 | 3 | 3 | 3 | 3 | 3 | 3 |
| 1 | 1 | 5 | 5 | 5 | 5 | 5 | 1 | 4 |
| 3 | 2 | 3 | 4 | 2 | 4 | 3 | 3 | 3 |
| 3 | 2 | 5 | 5 | 4 | 3 | 4 | 4 | 5 |
| 2 | 1 | 4 | 5 | 4 | 4 | 4 | 2 | 2 |
| 2 | 2 | 4 | 5 | 3 | 3 | 3 | 2 | 2 |
| 3 | 3 | 3 | 3 | 3 | 4 | 4 | 4 | 1 |
| 5 | 1 | 5 | 5 | 5 | 5 | 5 | 1 | 3 |
| 4 | 4 | 4 | 5 | 2 | 3 | 3 | 4 | 4 |
| 4 | 1 | 5 | 5 | 2 | 5 | 5 | 2 | 5 |
| 5 | 2 | 4 | 4 | 2 | 4 | 3 | 2 | 5 |
| 2 | 1 | 5 | 5 | 2 | 5 | 5 | 1 | 1 |
| 1 | 5 | 3 | 5 | 1 | 3 | 3 | 3 | 3 |
| 3 | 2 | 3 | 3 | 2 | 4 | 3 | 3 | 2 |
| 2 | 2 | 4 | 4 | 2 | 3 | 4 | 2 | 4 |
| 3 | 3 | 3 | 5 | 3 | 3 | 3 | 3 | 3 |
| 1 | 1 | 1 | 4 | 4 | 3 | 1 | 4 | 1 |
| 5 | 1 | 5 | 5 | 5 | 5 | 5 | 1 | 1 |
| 3 | 2 | 4 | 3 | 2 | 3 | 4 | 3 | 2 |
| 4 | 1 | 5 | 5 | 4 | 5 | 5 | 1 | 4 |
| 1 | 1 | 5 | 5 | 3 | 5 | 5 | 1 | 3 |
| 1 | 3 | 4 | 5 | 2 | 3 | 4 | 2 | 4 |
| 3 | 3 | 1 | 1 | 1 | 1 | 1 | 2 | 4 |
| 2 | 1 | 5 | 5 | 4 | 5 | 5 | 2 | 1 |
| 3 | 3 | 4 | 4 | 3 | 4 | 3 | 3 | 4 |
| 2 | 1 | 4 | 4 | 3 | 4 | 5 | 2 | 3 |
| 2 | 2 | 4 | 5 | 2 | 4 | 4 | 3 | 3 |
| 4 | 4 | 5 | 5 | 5 | 5 | 4 | 2 | 4 |
| 4 | 1 | 4 | 4 | 4 | 4 | 4 | 3 | 4 |
| 2 | 2 | 4 | 4 | 2 | 2 | 4 | 2 | 2 |
| 1 | 1 | 5 | 5 | 2 | 5 | 5 | 4 | 1 |
| 3 | 2 | 4 | 5 | 2 | 4 | 4 | 2 | 3 |
| 3 | 2 | 4 | 4 | 3 | 4 | 3 | 3 | 3 |
| 3 | 2 | 4 | 4 | 2 | 3 | 3 | 3 | 4 |
| 3 | 3 | 3 | 3 | 3 | 3 | 3 | 3 | 3 |
| 2 | 1 | 5 | 5 | 4 | 5 | 5 | 1 | 5 |
| 3 | 1 | 5 | 5 | 5 | 5 | 5 | 1 | 4 |
| 5 | 1 | 5 | 5 | 5 | 5 | 5 | 1 | 5 |
| 2 | 3 | 4 | 4 | 4 | 5 | 5 | 1 | 4 |
| 1 | 3 | 4 | 4 | 4 | 4 | 3 | 1 | 2 |
| 3 | 3 | 3 | 3 | 3 | 3 | 3 | 3 | 3 |
| 4 | 1 | 5 | 5 | 3 | 4 | 5 | 2 | 5 |



|   |   |   |   |   |   |   |   |   |
|---|---|---|---|---|---|---|---|---|
| 3 | 3 | 3 | 3 | 3 | 3 | 3 | 3 | 3 |
| 5 | 5 | 5 | 3 | 3 | 3 | 4 | 4 | 4 |
| 3 | 1 | 4 | 5 | 5 | 4 | 4 | 4 | 4 |
| 2 | 2 | 4 | 5 | 2 | 3 | 4 | 2 | 5 |
| 1 | 5 | 1 | 5 | 2 | 4 | 5 | 3 | 5 |
| 2 | 2 | 5 | 5 | 5 | 5 | 5 | 5 | 5 |
| 4 | 3 | 3 | 4 | 4 | 4 | 5 | 5 | 4 |
| 2 | 2 | 5 | 5 | 2 | 5 | 5 | 4 | 5 |
| 2 | 2 | 4 | 4 | 2 | 4 | 4 | 2 | 4 |
| 2 | 2 | 4 | 4 | 2 | 3 | 4 | 2 | 2 |
| 3 | 3 | 5 | 5 | 5 | 5 | 5 | 5 | 5 |
| 5 | 1 | 5 | 5 | 5 | 5 | 5 | 3 | 5 |
| 1 | 1 | 1 | 1 | 1 | 1 | 1 | 1 | 1 |
| 2 | 2 | 5 | 3 | 3 | 5 | 5 | 3 | 1 |
| 4 | 3 | 2 | 4 | 2 | 3 | 4 | 3 | 4 |
| 5 | 2 | 5 | 5 | 5 | 4 | 5 | 5 | 5 |
| 3 | 3 | 3 | 3 | 3 | 3 | 3 | 3 | 3 |
| 3 | 3 | 3 | 3 | 3 | 3 | 3 | 3 | 4 |
| 2 | 4 | 4 | 5 | 4 | 4 | 3 | 4 | 5 |
| 3 | 3 | 4 | 5 | 4 | 4 | 4 | 4 | 5 |
| 4 | 3 | 4 | 4 | 4 | 3 | 4 | 3 | 4 |
| 4 | 4 | 4 | 4 | 4 | 4 | 4 | 4 | 4 |
| 3 | 1 | 5 | 5 | 4 | 5 | 5 | 1 | 4 |
| 5 | 5 | 5 | 5 | 5 | 5 | 5 | 5 | 5 |
| 4 | 3 | 3 | 3 | 3 | 3 | 3 | 3 | 4 |
| 3 | 3 | 5 | 5 | 3 | 3 | 3 | 3 | 3 |
| 4 | 3 | 3 | 4 | 3 | 4 | 3 | 3 | 4 |
| 3 | 1 | 5 | 5 | 5 | 5 | 5 | 3 | 5 |
| 5 | 5 | 5 | 5 | 5 | 5 | 5 | 5 | 5 |
| 1 | 1 | 5 | 5 | 4 | 5 | 5 | 2 | 4 |
| 3 | 3 | 3 | 3 | 3 | 3 | 3 | 3 | 3 |
| 1 | 5 | 3 | 1 | 1 | 1 | 1 | 5 | 4 |
| 1 | 4 | 2 | 4 | 2 | 3 | 3 | 3 | 2 |
| 1 | 1 | 5 | 5 | 4 | 5 | 5 | 5 | 5 |
| 3 | 2 | 4 | 4 | 3 | 3 | 3 | 2 | 5 |
| 3 | 3 | 4 | 4 | 3 | 4 | 4 | 3 | 4 |
| 1 | 2 | 4 | 5 | 4 | 3 | 4 | 4 | 2 |
| 1 | 1 | 5 | 5 | 2 | 4 | 4 | 3 | 2 |
| 4 | 4 | 4 | 4 | 4 | 4 | 4 | 4 | 4 |
| 3 | 3 | 2 | 3 | 1 | 3 | 5 | 3 | 3 |
| 4 | 2 | 2 | 4 | 4 | 4 | 4 | 2 | 4 |
| 3 | 1 | 2 | 5 | 3 | 3 | 3 | 3 | 4 |
| 5 | 4 | 5 | 4 | 1 | 4 | 3 | 3 | 5 |
| 5 | 1 | 5 | 5 | 5 | 5 | 5 | 1 | 4 |
| 3 | 3 | 5 | 5 | 5 | 5 | 5 | 1 | 3 |
| 3 | 2 | 4 | 4 | 4 | 3 | 3 | 3 | 3 |
| 4 | 2 | 4 | 4 | 4 | 5 | 4 | 2 | 5 |
| 3 | 2 | 4 | 4 | 3 | 3 | 4 | 2 | 4 |
| 3 | 3 | 5 | 3 | 2 | 4 | 5 | 2 | 1 |
| 3 | 2 | 4 | 4 | 4 | 4 | 4 | 2 | 5 |
| 3 | 3 | 4 | 3 | 3 | 4 | 4 | 4 | 4 |
| 2 | 1 | 5 | 5 | 5 | 5 | 5 | 1 | 1 |
| 3 | 3 | 3 | 3 | 3 | 3 | 3 | 3 | 3 |
| 3 | 2 | 4 | 4 | 2 | 4 | 4 | 2 | 4 |

|   |   |   |   |   |   |   |   |   |
|---|---|---|---|---|---|---|---|---|
| 2 | 1 | 5 | 5 | 5 | 5 | 5 | 2 | 5 |
| 1 | 1 | 5 | 5 | 3 | 5 | 5 | 1 | 5 |
| 3 | 4 | 5 | 5 | 2 | 2 | 2 | 4 | 5 |
| 3 | 3 | 3 | 4 | 3 | 3 | 3 | 3 | 3 |
| 3 | 3 | 3 | 3 | 3 | 3 | 3 | 3 | 3 |
| 1 | 1 | 5 | 5 | 3 | 5 | 5 | 1 | 5 |
| 1 | 1 | 5 | 5 | 5 | 5 | 5 | 1 | 1 |
| 4 | 4 | 4 | 4 | 4 | 4 | 4 | 4 | 4 |
| 1 | 5 | 5 | 5 | 4 | 3 | 2 | 1 | 1 |
| 5 | 5 | 3 | 3 | 1 | 1 | 1 | 4 | 5 |
| 3 | 3 | 4 | 4 | 4 | 4 | 4 | 2 | 4 |
| 2 | 2 | 5 | 5 | 2 | 4 | 4 | 4 | 4 |
| 2 | 2 | 2 | 2 | 2 | 2 | 2 | 4 | 4 |
| 4 | 2 | 5 | 5 | 2 | 4 | 3 | 2 | 4 |
| 1 | 1 | 5 | 5 | 5 | 4 | 5 | 2 | 4 |
| 5 | 2 | 5 | 5 | 5 | 5 | 5 | 2 | 5 |
| 3 | 3 | 3 | 3 | 3 | 3 | 3 | 3 | 3 |
| 2 | 3 | 4 | 5 | 2 | 2 | 2 | 4 | 5 |
| 4 | 1 | 5 | 5 | 4 | 5 | 5 | 1 | 4 |
| 2 | 3 | 4 | 4 | 3 | 3 | 3 | 4 | 3 |
| 2 | 1 | 4 | 3 | 4 | 4 | 4 | 2 | 2 |
| 4 | 2 | 4 | 5 | 3 | 3 | 4 | 4 | 4 |
| 2 | 3 | 5 | 5 | 1 | 4 | 4 | 3 | 4 |
| 3 | 2 | 4 | 3 | 2 | 4 | 4 | 4 | 4 |
| 4 | 3 | 5 | 5 | 5 | 5 | 5 | 5 | 1 |
| 1 | 5 | 5 | 5 | 1 | 1 | 1 | 5 | 1 |
| 2 | 2 | 4 | 4 | 4 | 4 | 4 | 4 | 3 |
| 3 | 2 | 4 | 4 | 3 | 3 | 4 | 3 | 4 |
| 2 | 5 | 5 | 5 | 5 | 5 | 5 | 1 | 1 |
| 2 | 1 | 5 | 5 | 4 | 5 | 5 | 1 | 5 |
| 1 | 1 | 5 | 5 | 4 | 5 | 5 | 1 | 5 |
| 4 | 2 | 4 | 5 | 3 | 3 | 4 | 3 | 5 |
| 1 | 4 | 2 | 4 | 2 | 2 | 2 | 3 | 2 |
| 5 | 5 | 5 | 5 | 5 | 5 | 5 | 5 | 5 |
| 3 | 3 | 3 | 3 | 3 | 3 | 3 | 3 | 3 |
| 4 | 3 | 4 | 4 | 4 | 4 | 5 | 3 | 5 |
| 2 | 1 | 5 | 5 | 5 | 5 | 4 | 5 | 4 |
| 3 | 2 | 5 | 5 | 3 | 4 | 4 | 2 | 4 |
| 1 | 4 | 5 | 5 | 1 | 1 | 1 | 4 | 2 |
| 3 | 4 | 4 | 5 | 3 | 2 | 1 | 4 | 4 |
| 2 | 2 | 4 | 4 | 4 | 4 | 4 | 2 | 4 |
| 3 | 3 | 3 | 4 | 3 | 3 | 3 | 3 | 2 |
| 2 | 2 | 4 | 4 | 3 | 3 | 4 | 3 | 3 |
| 4 | 4 | 4 | 4 | 4 | 4 | 4 | 4 | 4 |
| 3 | 2 | 4 | 4 | 2 | 2 | 4 | 3 | 3 |
| 2 | 3 | 4 | 4 | 3 | 3 | 2 | 3 | 4 |
| 4 | 2 | 4 | 4 | 4 | 4 | 4 | 1 | 4 |
| 2 | 2 | 4 | 5 | 4 | 4 | 4 | 1 | 4 |
| 2 | 2 | 5 | 4 | 3 | 4 | 4 | 2 | 3 |
| 3 | 1 | 5 | 5 | 4 | 3 | 3 | 4 | 4 |
| 2 | 3 | 4 | 3 | 3 | 2 | 3 | 4 | 2 |
| 2 | 1 | 5 | 5 | 3 | 4 | 4 | 2 | 4 |
| 2 | 4 | 5 | 5 | 2 | 4 | 4 | 4 | 2 |
| 2 | 4 | 3 | 4 | 2 | 3 | 2 | 4 | 4 |

|   |   |   |   |   |   |   |   |   |
|---|---|---|---|---|---|---|---|---|
| 4 | 1 | 5 | 4 | 3 | 4 | 4 | 3 | 5 |
| 3 | 2 | 4 | 4 | 4 | 4 | 4 | 4 | 4 |
| 3 | 3 | 5 | 5 | 3 | 3 | 3 | 3 | 3 |
| 5 | 4 | 4 | 4 | 2 | 4 | 4 | 5 | 5 |
| 4 | 4 | 4 | 4 | 4 | 4 | 4 | 4 | 4 |
| 2 | 3 | 2 | 4 | 2 | 2 | 2 | 4 | 2 |
| 4 | 2 | 4 | 5 | 4 | 5 | 5 | 2 | 2 |
| 1 | 3 | 3 | 4 | 2 | 2 | 4 | 4 | 2 |
| 4 | 3 | 4 | 4 | 2 | 4 | 3 | 3 | 4 |
| 3 | 3 | 4 | 4 | 3 | 3 | 4 | 4 | 3 |
| 5 | 3 | 4 | 5 | 2 | 3 | 3 | 2 | 5 |
| 3 | 2 | 4 | 5 | 4 | 4 | 4 | 2 | 4 |
| 4 | 4 | 4 | 4 | 4 | 4 | 4 | 4 | 4 |
| 3 | 3 | 4 | 4 | 4 | 4 | 4 | 3 | 4 |
| 4 | 3 | 4 | 4 | 3 | 4 | 4 | 3 | 4 |
| 4 | 4 | 4 | 4 | 4 | 4 | 4 | 4 | 4 |
| 4 | 4 | 4 | 4 | 4 | 4 | 4 | 4 | 4 |
| 4 | 1 | 5 | 5 | 4 | 4 | 4 | 2 | 5 |
| 3 | 3 | 4 | 4 | 3 | 3 | 3 | 3 | 4 |
| 3 | 3 | 3 | 3 | 3 | 3 | 3 | 3 | 3 |
| 1 | 1 | 3 | 4 | 2 | 4 | 4 | 2 | 4 |
| 3 | 3 | 3 | 3 | 3 | 3 | 3 | 3 | 4 |
| 3 | 2 | 5 | 5 | 5 | 4 | 5 | 3 | 3 |
| 3 | 3 | 4 | 5 | 4 | 3 | 3 | 3 | 5 |
| 3 | 2 | 4 | 4 | 2 | 4 | 4 | 2 | 4 |
| 2 | 2 | 5 | 5 | 2 | 5 | 5 | 2 | 5 |
| 4 | 2 | 4 | 5 | 4 | 4 | 4 | 3 | 3 |
| 2 | 4 | 4 | 4 | 2 | 2 | 2 | 4 | 4 |
| 5 | 3 | 4 | 4 | 2 | 3 | 4 | 4 | 5 |
| 3 | 2 | 4 | 4 | 4 | 4 | 4 | 2 | 4 |
| 3 | 1 | 4 | 4 | 3 | 4 | 4 | 3 | 4 |
| 4 | 2 | 4 | 4 | 4 | 3 | 4 | 2 | 4 |
| 2 | 2 | 4 | 4 | 3 | 4 | 4 | 4 | 3 |
| 3 | 3 | 4 | 5 | 4 | 4 | 4 | 3 | 5 |
| 4 | 2 | 4 | 5 | 4 | 4 | 4 | 2 | 4 |
| 2 | 3 | 5 | 5 | 2 | 3 | 3 | 4 | 4 |
| 1 | 5 | 2 | 4 | 2 | 2 | 2 | 4 | 5 |
| 3 | 4 | 4 | 4 | 2 | 3 | 3 | 3 | 3 |
| 5 | 2 | 4 | 4 | 2 | 4 | 2 | 2 | 4 |
| 1 | 1 | 5 | 5 | 5 | 3 | 5 | 5 | 5 |
| 2 | 5 | 5 | 5 | 2 | 2 | 2 | 4 | 4 |
| 3 | 3 | 3 | 3 | 3 | 4 | 3 | 3 | 3 |
| 2 | 4 | 3 | 3 | 2 | 2 | 3 | 4 | 3 |
| 2 | 4 | 3 | 4 | 3 | 3 | 3 | 4 | 4 |
| 4 | 2 | 1 | 4 | 2 | 2 | 3 | 4 | 5 |
| 3 | 3 | 4 | 4 | 3 | 4 | 4 | 2 | 3 |
| 2 | 3 | 5 | 4 | 2 | 3 | 3 | 4 | 2 |
| 5 | 1 | 5 | 5 | 5 | 5 | 5 | 5 | 5 |
| 2 | 2 | 4 | 4 | 4 | 4 | 4 | 2 | 2 |
| 4 | 2 | 5 | 4 | 4 | 4 | 3 | 4 | 4 |
| 3 | 1 | 5 | 5 | 5 | 5 | 5 | 2 | 3 |
| 2 | 3 | 2 | 3 | 4 | 4 | 4 | 2 | 4 |
| 4 | 2 | 4 | 4 | 2 | 3 | 4 | 2 | 4 |
| 3 | 2 | 3 | 3 | 3 | 3 | 3 | 3 | 3 |

|   |   |   |   |   |   |   |   |   |
|---|---|---|---|---|---|---|---|---|
| 2 | 2 | 4 | 4 | 4 | 4 | 4 | 2 | 4 |
| 5 | 2 | 5 | 4 | 4 | 5 | 5 | 1 | 4 |
| 4 | 2 | 5 | 5 | 4 | 4 | 4 | 4 | 5 |
| 3 | 3 | 3 | 4 | 3 | 2 | 2 | 4 | 3 |
| 3 | 4 | 4 | 4 | 2 | 2 | 2 | 4 | 4 |
| 5 | 1 | 5 | 5 | 5 | 5 | 5 | 2 | 4 |
| 3 | 2 | 4 | 4 | 3 | 4 | 4 | 3 | 4 |
| 1 | 3 | 3 | 4 | 1 | 2 | 2 | 2 | 1 |
| 2 | 2 | 4 | 4 | 2 | 4 | 4 | 2 | 4 |
| 1 | 5 | 3 | 5 | 2 | 3 | 2 | 2 | 2 |
| 3 | 3 | 4 | 5 | 3 | 3 | 3 | 2 | 4 |
| 3 | 2 | 4 | 5 | 2 | 4 | 4 | 2 | 5 |
| 3 | 2 | 4 | 5 | 2 | 3 | 3 | 2 | 3 |
| 3 | 4 | 5 | 5 | 2 | 3 | 4 | 4 | 2 |
| 3 | 1 | 5 | 5 | 2 | 3 | 3 | 3 | 3 |
| 3 | 2 | 4 | 4 | 2 | 3 | 3 | 2 | 4 |
| 4 | 4 | 4 | 4 | 2 | 2 | 3 | 4 | 4 |
| 1 | 4 | 4 | 4 | 3 | 3 | 5 | 3 | 4 |
| 5 | 1 | 5 | 5 | 5 | 5 | 5 | 5 | 5 |
| 5 | 1 | 5 | 5 | 5 | 5 | 5 | 1 | 3 |
| 4 | 2 | 4 | 4 | 4 | 4 | 5 | 4 | 5 |
| 2 | 1 | 5 | 5 | 2 | 5 | 5 | 1 | 3 |
| 2 | 1 | 5 | 4 | 4 | 4 | 4 | 2 | 4 |
| 1 | 1 | 5 | 5 | 5 | 5 | 5 | 2 | 4 |
| 1 | 5 | 2 | 5 | 1 | 1 | 1 | 1 | 1 |
| 2 | 3 | 3 | 3 | 2 | 4 | 3 | 3 | 2 |
| 3 | 1 | 5 | 5 | 5 | 4 | 5 | 3 | 3 |
| 1 | 4 | 5 | 5 | 3 | 3 | 3 | 4 | 2 |
| 3 | 3 | 4 | 4 | 3 | 3 | 4 | 3 | 4 |
| 3 | 3 | 3 | 5 | 3 | 3 | 3 | 3 | 3 |
| 3 | 1 | 5 | 5 | 3 | 4 | 4 | 2 | 3 |
| 3 | 1 | 5 | 5 | 3 | 3 | 3 | 3 | 3 |
| 2 | 1 | 5 | 5 | 3 | 4 | 4 | 2 | 4 |
| 1 | 5 | 2 | 1 | 1 | 1 | 1 | 5 | 5 |
| 2 | 4 | 4 | 4 | 3 | 2 | 3 | 4 | 5 |
| 3 | 4 | 4 | 4 | 2 | 2 | 2 | 4 | 2 |
| 2 | 2 | 2 | 2 | 2 | 2 | 2 | 2 | 2 |
| 2 | 3 | 4 | 4 | 3 | 3 | 4 | 4 | 4 |
| 3 | 1 | 5 | 4 | 4 | 4 | 4 | 3 | 4 |
| 3 | 4 | 3 | 4 | 1 | 3 | 2 | 5 | 5 |
| 5 | 2 | 5 | 5 | 1 | 2 | 5 | 1 | 5 |
| 3 | 2 | 4 | 4 | 4 | 3 | 3 | 3 | 3 |
| 2 | 4 | 3 | 5 | 2 | 2 | 2 | 4 | 5 |
| 1 | 2 | 4 | 5 | 1 | 1 | 4 | 5 | 1 |
| 4 | 4 | 4 | 4 | 4 | 4 | 4 | 4 | 4 |
| 2 | 2 | 4 | 4 | 4 | 4 | 4 | 4 | 2 |
| 2 | 2 | 4 | 5 | 2 | 4 | 4 | 2 | 4 |
| 2 | 5 | 5 | 3 | 3 | 3 | 1 | 1 | 4 |
| 1 | 1 | 5 | 5 | 5 | 5 | 5 | 2 | 1 |
| 3 | 2 | 5 | 5 | 3 | 4 | 4 | 3 | 4 |
| 5 | 2 | 5 | 5 | 5 | 5 | 5 | 5 | 5 |
| 3 | 3 | 3 | 5 | 3 | 4 | 3 | 3 | 3 |
| 4 | 4 | 4 | 4 | 2 | 3 | 3 | 4 | 4 |
| 2 | 3 | 4 | 4 | 3 | 3 | 4 | 2 | 2 |

|   |   |   |   |   |   |   |   |   |
|---|---|---|---|---|---|---|---|---|
| 2 | 3 | 4 | 4 | 2 | 2 | 4 | 4 | 2 |
| 3 | 3 | 4 | 4 | 3 | 4 | 3 | 2 | 4 |
| 3 | 2 | 5 | 5 | 5 | 3 | 5 | 5 | 5 |
| 3 | 1 | 4 | 4 | 3 | 4 | 4 | 2 | 4 |
| 5 | 4 | 3 | 5 | 1 | 1 | 2 | 5 | 1 |
| 2 | 3 | 4 | 4 | 2 | 3 | 3 | 2 | 4 |
| 3 | 2 | 5 | 5 | 4 | 5 | 4 | 2 | 5 |
| 2 | 3 | 2 | 5 | 2 | 3 | 3 | 3 | 3 |
| 5 | 1 | 5 | 5 | 4 | 5 | 5 | 1 | 5 |
| 1 | 1 | 5 | 5 | 5 | 5 | 5 | 1 | 1 |
| 4 | 2 | 4 | 5 | 3 | 4 | 4 | 4 | 4 |
| 5 | 5 | 5 | 5 | 4 | 2 | 3 | 2 | 2 |
| 2 | 1 | 4 | 5 | 3 | 5 | 5 | 3 | 1 |
| 2 | 3 | 4 | 4 | 4 | 4 | 4 | 4 | 3 |
| 2 | 2 | 4 | 4 | 3 | 4 | 4 | 3 | 2 |
| 5 | 1 | 5 | 5 | 5 | 5 | 5 | 1 | 5 |
| 3 | 2 | 4 | 4 | 3 | 4 | 4 | 4 | 4 |
| 3 | 3 | 3 | 3 | 2 | 2 | 4 | 2 | 5 |
| 3 | 4 | 5 | 5 | 2 | 4 | 4 | 4 | 3 |
| 2 | 2 | 4 | 5 | 3 | 4 | 4 | 4 | 3 |
| 3 | 3 | 4 | 5 | 3 | 2 | 3 | 4 | 4 |
| 4 | 2 | 4 | 4 | 4 | 4 | 4 | 2 | 4 |
| 3 | 3 | 4 | 3 | 3 | 4 | 3 | 3 | 4 |
| 2 | 4 | 4 | 4 | 3 | 3 | 3 | 4 | 2 |
| 3 | 2 | 4 | 4 | 3 | 2 | 3 | 4 | 4 |
| 1 | 5 | 5 | 5 | 1 | 1 | 3 | 5 | 1 |
| 3 | 2 | 5 | 4 | 3 | 4 | 4 | 1 | 4 |
| 4 | 4 | 4 | 5 | 2 | 3 | 3 | 4 | 5 |
| 5 | 5 | 5 | 5 | 5 | 5 | 5 | 5 | 5 |
| 2 | 4 | 4 | 4 | 2 | 2 | 2 | 4 | 2 |
| 4 | 3 | 4 | 4 | 3 | 3 | 4 | 3 | 3 |
| 5 | 1 | 5 | 5 | 5 | 5 | 5 | 2 | 5 |
| 2 | 3 | 4 | 4 | 2 | 3 | 3 | 4 | 3 |
| 2 | 2 | 3 | 4 | 3 | 4 | 4 | 2 | 4 |
| 1 | 1 | 5 | 5 | 5 | 5 | 5 | 1 | 5 |
| 3 | 3 | 4 | 4 | 2 | 3 | 3 | 3 | 4 |
| 5 | 1 | 5 | 5 | 2 | 4 | 4 | 2 | 4 |
| 4 | 4 | 4 | 4 | 4 | 4 | 4 | 4 | 4 |
| 2 | 3 | 3 | 4 | 4 | 2 | 2 | 4 | 4 |
| 4 | 2 | 4 | 4 | 4 | 4 | 4 | 3 | 4 |
| 2 | 3 | 4 | 4 | 4 | 3 | 3 | 2 | 3 |
| 2 | 4 | 5 | 5 | 3 | 2 | 5 | 2 | 5 |
| 2 | 4 | 3 | 5 | 2 | 2 | 2 | 4 | 4 |
| 4 | 2 | 4 | 4 | 3 | 4 | 4 | 2 | 4 |
| 3 | 1 | 5 | 5 | 2 | 4 | 5 | 2 | 4 |
| 3 | 1 | 5 | 5 | 3 | 3 | 4 | 3 | 4 |
| 3 | 2 | 5 | 5 | 3 | 3 | 3 | 3 | 2 |
| 2 | 2 | 4 | 4 | 4 | 4 | 4 | 2 | 4 |
| 2 | 5 | 3 | 3 | 2 | 2 | 2 | 2 | 2 |
| 3 | 3 | 3 | 3 | 3 | 3 | 3 | 3 | 3 |
| 4 | 2 | 4 | 4 | 4 | 4 | 4 | 2 | 2 |
| 3 | 3 | 3 | 3 | 3 | 3 | 3 | 3 | 3 |
| 4 | 3 | 4 | 4 | 4 | 4 | 4 | 3 | 4 |
| 4 | 4 | 4 | 4 | 2 | 2 | 4 | 4 | 5 |

|   |   |   |   |   |   |   |   |   |
|---|---|---|---|---|---|---|---|---|
| 3 | 3 | 3 | 3 | 4 | 4 | 4 | 4 | 4 |
| 5 | 3 | 4 | 5 | 5 | 5 | 5 | 5 | 5 |
| 3 | 3 | 4 | 4 | 4 | 3 | 2 | 2 | 3 |
| 4 | 2 | 4 | 1 | 1 | 2 | 2 | 4 | 2 |
| 3 | 4 | 4 | 4 | 4 | 3 | 4 | 2 | 4 |
| 2 | 2 | 4 | 4 | 3 | 4 | 4 | 2 | 4 |
| 4 | 5 | 3 | 4 | 2 | 2 | 2 | 5 | 5 |
| 2 | 4 | 4 | 3 | 3 | 1 | 2 | 4 | 5 |
| 1 | 5 | 4 | 5 | 3 | 2 | 1 | 5 | 1 |
| 1 | 4 | 3 | 3 | 3 | 3 | 3 | 3 | 3 |
| 3 | 2 | 5 | 5 | 2 | 3 | 4 | 5 | 5 |
| 3 | 1 | 5 | 5 | 4 | 4 | 4 | 3 | 5 |
| 3 | 3 | 3 | 3 | 4 | 4 | 4 | 3 | 4 |
| 3 | 2 | 4 | 5 | 2 | 2 | 3 | 4 | 4 |
| 4 | 2 | 4 | 5 | 4 | 4 | 4 | 2 | 4 |
| 2 | 2 | 5 | 5 | 2 | 4 | 4 | 3 | 2 |
| 2 | 4 | 4 | 4 | 3 | 2 | 3 | 4 | 4 |
| 3 | 3 | 3 | 3 | 2 | 3 | 2 | 4 | 3 |
| 4 | 1 | 5 | 4 | 4 | 3 | 4 | 1 | 5 |
| 2 | 3 | 4 | 5 | 3 | 3 | 4 | 4 | 2 |
| 2 | 2 | 3 | 3 | 3 | 2 | 2 | 4 | 4 |
| 4 | 4 | 4 | 4 | 4 | 4 | 4 | 4 | 4 |
| 1 | 3 | 4 | 1 | 2 | 3 | 1 | 3 | 4 |
| 3 | 3 | 4 | 3 | 3 | 2 | 3 | 3 | 3 |
| 4 | 1 | 5 | 5 | 4 | 5 | 5 | 2 | 4 |
| 1 | 5 | 4 | 5 | 1 | 1 | 5 | 4 | 4 |
| 4 | 3 | 4 | 4 | 4 | 4 | 3 | 2 | 5 |
| 4 | 2 | 4 | 4 | 4 | 4 | 4 | 2 | 4 |
| 2 | 2 | 4 | 4 | 3 | 2 | 3 | 4 | 4 |
| 3 | 2 | 4 | 4 | 3 | 3 | 4 | 2 | 2 |
| 5 | 5 | 5 | 5 | 5 | 5 | 5 | 5 | 5 |
| 2 | 2 | 4 | 5 | 5 | 3 | 4 | 2 | 2 |
| 2 | 2 | 2 | 2 | 2 | 2 | 2 | 2 | 2 |
| 4 | 4 | 4 | 4 | 4 | 4 | 4 | 4 | 4 |
| 4 | 2 | 5 | 4 | 4 | 4 | 4 | 2 | 4 |
| 3 | 3 | 3 | 3 | 3 | 3 | 3 | 3 | 3 |
| 5 | 1 | 5 | 4 | 5 | 5 | 5 | 5 | 5 |
| 5 | 2 | 4 | 5 | 4 | 5 | 5 | 1 | 3 |
| 3 | 4 | 4 | 4 | 3 | 3 | 4 | 4 | 3 |
| 3 | 1 | 5 | 5 | 4 | 5 | 5 | 1 | 4 |
| 4 | 4 | 4 | 4 | 4 | 4 | 4 | 4 | 4 |
| 2 | 3 | 2 | 4 | 4 | 4 | 4 | 4 | 4 |
| 5 | 2 | 5 | 5 | 5 | 4 | 4 | 2 | 2 |
| 4 | 3 | 4 | 4 | 3 | 4 | 4 | 3 | 4 |
| 4 | 4 | 4 | 4 | 4 | 4 | 4 | 4 | 4 |
| 2 | 3 | 3 | 4 | 4 | 3 | 3 | 5 | 4 |
| 4 | 2 | 4 | 4 | 4 | 4 | 4 | 3 | 4 |
| 4 | 2 | 5 | 5 | 4 | 4 | 4 | 2 | 4 |
| 4 | 1 | 4 | 4 | 4 | 4 | 4 | 2 | 4 |
| 4 | 2 | 4 | 4 | 4 | 4 | 4 | 2 | 4 |
| 3 | 2 | 4 | 4 | 3 | 4 | 4 | 2 | 4 |
| 3 | 3 | 3 | 4 | 3 | 3 | 3 | 3 | 4 |
| 1 | 1 | 5 | 5 | 3 | 4 | 5 | 1 | 4 |
| 4 | 1 | 5 | 4 | 3 | 4 | 4 | 2 | 4 |

|   |   |   |   |   |   |   |   |   |
|---|---|---|---|---|---|---|---|---|
| 5 | 1 | 5 | 5 | 5 | 5 | 5 | 5 | 5 |
| 5 | 5 | 5 | 5 | 5 | 5 | 5 | 1 | 5 |
| 2 | 2 | 4 | 3 | 2 | 2 | 4 | 2 | 2 |
| 3 | 4 | 4 | 4 | 3 | 3 | 4 | 3 | 3 |
| 3 | 1 | 5 | 5 | 4 | 4 | 5 | 1 | 5 |
| 4 | 1 | 5 | 5 | 5 | 5 | 5 | 1 | 5 |
| 2 | 1 | 5 | 5 | 2 | 4 | 3 | 3 | 5 |
| 3 | 2 | 5 | 5 | 5 | 5 | 5 | 2 | 5 |
| 3 | 3 | 5 | 5 | 3 | 3 | 3 | 1 | 5 |
| 3 | 2 | 5 | 4 | 4 | 5 | 5 | 2 | 5 |
| 2 | 1 | 5 | 4 | 2 | 4 | 4 | 1 | 2 |
| 2 | 2 | 2 | 3 | 3 | 2 | 3 | 3 | 4 |
| 2 | 2 | 4 | 4 | 3 | 4 | 4 | 4 | 4 |
| 3 | 2 | 4 | 4 | 3 | 4 | 4 | 2 | 4 |
| 4 | 4 | 4 | 4 | 4 | 4 | 4 | 2 | 4 |
| 2 | 4 | 4 | 4 | 2 | 2 | 2 | 4 | 2 |
| 2 | 2 | 4 | 4 | 2 | 3 | 4 | 4 | 4 |
| 1 | 2 | 4 | 4 | 4 | 4 | 4 | 1 | 4 |
| 2 | 2 | 4 | 4 | 2 | 4 | 3 | 2 | 4 |
| 2 | 1 | 5 | 5 | 5 | 1 | 5 | 2 | 1 |
| 2 | 1 | 5 | 5 | 5 | 5 | 5 | 1 | 5 |
| 1 | 1 | 3 | 4 | 3 | 1 | 1 | 4 | 2 |
| 3 | 3 | 3 | 3 | 3 | 3 | 3 | 3 | 3 |
| 3 | 2 | 5 | 5 | 3 | 4 | 4 | 3 | 3 |
| 4 | 5 | 5 | 5 | 5 | 5 | 5 | 4 | 4 |
| 1 | 2 | 3 | 5 | 1 | 3 | 3 | 3 | 4 |
| 3 | 3 | 4 | 4 | 3 | 3 | 3 | 2 | 4 |
| 2 | 2 | 5 | 5 | 2 | 4 | 4 | 2 | 4 |
| 4 | 4 | 4 | 4 | 4 | 4 | 4 | 2 | 4 |
| 1 | 5 | 3 | 5 | 2 | 2 | 2 | 4 | 4 |
| 3 | 2 | 4 | 4 | 4 | 4 | 4 | 2 | 3 |
| 4 | 4 | 5 | 5 | 4 | 3 | 4 | 3 | 5 |
| 5 | 1 | 5 | 5 | 5 | 5 | 5 | 5 | 5 |
| 1 | 1 | 5 | 5 | 3 | 4 | 4 | 2 | 2 |
| 5 | 2 | 5 | 5 | 5 | 5 | 5 | 2 | 3 |
| 5 | 1 | 5 | 5 | 3 | 5 | 5 | 1 | 4 |
| 3 | 5 | 5 | 5 | 3 | 5 | 5 | 2 | 3 |
| 4 | 4 | 4 | 4 | 4 | 4 | 4 | 3 | 4 |
| 2 | 1 | 5 | 5 | 5 | 5 | 5 | 1 | 5 |
| 3 | 2 | 4 | 4 | 4 | 4 | 3 | 2 | 3 |
| 5 | 5 | 5 | 5 | 5 | 5 | 5 | 5 | 5 |
| 3 | 3 | 3 | 3 | 2 | 3 | 3 | 3 | 3 |
| 3 | 1 | 5 | 5 | 3 | 4 | 4 | 3 | 3 |
| 4 | 4 | 4 | 4 | 4 | 4 | 4 | 2 | 4 |
| 4 | 1 | 5 | 5 | 4 | 4 | 4 | 2 | 5 |
| 2 | 3 | 4 | 2 | 3 | 3 | 3 | 5 | 4 |
| 1 | 5 | 5 | 5 | 1 | 1 | 4 | 1 | 1 |
| 3 | 3 | 5 | 5 | 2 | 3 | 3 | 3 | 3 |
| 3 | 3 | 4 | 4 | 4 | 3 | 4 | 3 | 3 |
| 5 | 2 | 3 | 4 | 4 | 4 | 4 | 2 | 4 |
| 3 | 4 | 3 | 3 | 3 | 3 | 3 | 4 | 4 |
| 4 | 2 | 4 | 4 | 2 | 4 | 4 | 2 | 5 |
| 4 | 2 | 4 | 4 | 4 | 4 | 4 | 2 | 4 |
| 4 | 1 | 5 | 5 | 3 | 5 | 5 | 1 | 5 |

|   |   |   |   |   |   |   |   |   |
|---|---|---|---|---|---|---|---|---|
| 5 | 1 | 5 | 5 | 5 | 5 | 5 | 1 | 5 |
| 1 | 1 | 5 | 5 | 5 | 5 | 5 | 2 | 1 |
| 3 | 3 | 4 | 4 | 4 | 3 | 4 | 3 | 1 |
| 2 | 2 | 4 | 4 | 3 | 3 | 4 | 2 | 4 |
| 2 | 3 | 4 | 4 | 2 | 3 | 2 | 2 | 5 |
| 5 | 2 | 5 | 5 | 5 | 5 | 5 | 1 | 2 |
| 1 | 2 | 4 | 1 | 3 | 3 | 3 | 3 | 3 |
| 4 | 2 | 5 | 5 | 5 | 5 | 5 | 1 | 1 |
| 5 | 5 | 5 | 5 | 5 | 5 | 5 | 5 | 5 |
| 1 | 1 | 5 | 4 | 4 | 4 | 4 | 1 | 5 |
| 2 | 2 | 4 | 4 | 3 | 4 | 4 | 2 | 4 |
| 4 | 3 | 4 | 4 | 5 | 3 | 1 | 2 | 3 |
| 5 | 1 | 5 | 5 | 5 | 5 | 5 | 1 | 5 |
| 3 | 3 | 3 | 3 | 3 | 3 | 3 | 3 | 3 |
| 3 | 2 | 4 | 4 | 4 | 4 | 4 | 1 | 5 |
| 2 | 2 | 5 | 4 | 5 | 5 | 5 | 1 | 5 |
| 3 | 2 | 4 | 5 | 3 | 3 | 2 | 3 | 2 |
| 3 | 5 | 3 | 4 | 2 | 4 | 2 | 4 | 4 |
| 4 | 1 | 1 | 2 | 3 | 3 | 4 | 2 | 3 |
| 2 | 2 | 4 | 4 | 3 | 4 | 4 | 2 | 2 |
| 2 | 3 | 3 | 4 | 4 | 3 | 3 | 2 | 5 |
| 4 | 2 | 4 | 5 | 4 | 4 | 4 | 2 | 2 |
| 2 | 1 | 5 | 5 | 5 | 5 | 5 | 5 | 5 |
| 1 | 1 | 5 | 5 | 5 | 5 | 5 | 1 | 5 |
| 3 | 4 | 3 | 3 | 3 | 3 | 3 | 3 | 5 |
| 3 | 2 | 5 | 4 | 5 | 5 | 5 | 2 | 5 |
| 2 | 1 | 5 | 5 | 2 | 5 | 5 | 1 | 5 |
| 5 | 2 | 4 | 5 | 5 | 3 | 4 | 3 | 5 |
| 2 | 1 | 5 | 5 | 2 | 3 | 3 | 3 | 2 |
| 3 | 4 | 4 | 4 | 4 | 4 | 4 | 2 | 1 |
| 3 | 3 | 3 | 3 | 3 | 3 | 3 | 3 | 3 |
| 4 | 1 | 5 | 5 | 5 | 5 | 5 | 1 | 5 |
| 4 | 2 | 4 | 4 | 4 | 4 | 4 | 2 | 4 |
| 3 | 1 | 5 | 5 | 3 | 4 | 5 | 1 | 5 |
| 2 | 1 | 4 | 4 | 2 | 3 | 3 | 4 | 5 |
| 2 | 3 | 2 | 5 | 2 | 2 | 2 | 5 | 4 |
| 2 | 3 | 3 | 3 | 3 | 3 | 3 | 4 | 4 |
| 1 | 1 | 5 | 5 | 5 | 5 | 5 | 1 | 5 |
| 4 | 4 | 5 | 3 | 5 | 5 | 5 | 2 | 2 |
| 2 | 1 | 5 | 3 | 4 | 3 | 4 | 2 | 4 |
| 2 | 2 | 4 | 4 | 4 | 4 | 4 | 2 | 4 |
| 1 | 1 | 5 | 5 | 5 | 5 | 5 | 1 | 3 |
| 5 | 2 | 5 | 5 | 3 | 3 | 5 | 3 | 5 |
| 4 | 1 | 5 | 5 | 5 | 5 | 5 | 1 | 5 |
| 3 | 3 | 3 | 3 | 3 | 3 | 3 | 3 | 3 |
| 2 | 2 | 3 | 4 | 3 | 4 | 4 | 2 | 3 |
| 3 | 1 | 5 | 4 | 4 | 5 | 4 | 1 | 3 |
| 1 | 3 | 5 | 5 | 2 | 4 | 5 | 2 | 5 |
| 4 | 3 | 4 | 4 | 2 | 2 | 2 | 4 | 4 |
| 4 | 1 | 5 | 5 | 5 | 5 | 5 | 1 | 5 |
| 3 | 3 | 3 | 3 | 3 | 3 | 3 | 3 | 3 |
| 4 | 1 | 5 | 5 | 4 | 4 | 5 | 2 | 5 |
| 5 | 1 | 5 | 5 | 5 | 5 | 5 | 1 | 5 |
| 2 | 3 | 4 | 5 | 2 | 2 | 5 | 5 | 5 |



|   |   |   |   |   |   |   |   |   |
|---|---|---|---|---|---|---|---|---|
| 3 | 3 | 3 | 3 | 3 | 3 | 3 | 3 | 3 |
| 3 | 2 | 4 | 4 | 4 | 4 | 4 | 2 | 4 |
| 4 | 1 | 4 | 5 | 4 | 4 | 4 | 1 | 4 |
| 3 | 3 | 3 | 3 | 3 | 3 | 3 | 3 | 3 |
| 5 | 3 | 5 | 5 | 5 | 5 | 5 | 5 | 5 |
| 1 | 1 | 5 | 5 | 4 | 5 | 5 | 1 | 5 |
| 5 | 5 | 5 | 5 | 5 | 5 | 5 | 5 | 3 |
| 2 | 2 | 4 | 4 | 5 | 2 | 2 | 2 | 1 |
| 4 | 1 | 4 | 4 | 5 | 5 | 4 | 2 | 1 |
| 5 | 1 | 5 | 5 | 5 | 5 | 5 | 1 | 5 |
| 5 | 1 | 5 | 5 | 5 | 5 | 5 | 1 | 5 |
| 3 | 2 | 4 | 4 | 4 | 3 | 3 | 2 | 4 |
| 5 | 1 | 5 | 5 | 5 | 5 | 5 | 1 | 5 |
| 5 | 5 | 1 | 5 | 1 | 1 | 1 | 1 | 4 |
| 2 | 2 | 5 | 5 | 3 | 3 | 3 | 2 | 3 |
| 4 | 2 | 4 | 4 | 4 | 4 | 5 | 5 | 4 |
| 2 | 1 | 5 | 5 | 3 | 3 | 3 | 3 | 3 |
| 4 | 1 | 5 | 5 | 4 | 5 | 5 | 1 | 4 |
| 4 | 2 | 4 | 4 | 4 | 4 | 4 | 2 | 4 |
| 3 | 3 | 3 | 4 | 3 | 4 | 4 | 2 | 3 |
| 3 | 2 | 5 | 5 | 5 | 5 | 5 | 1 | 3 |
| 3 | 3 | 3 | 3 | 3 | 3 | 3 | 3 | 3 |
| 5 | 5 | 5 | 5 | 5 | 5 | 5 | 5 | 5 |
| 3 | 1 | 4 | 5 | 5 | 5 | 5 | 1 | 5 |
| 3 | 3 | 3 | 3 | 3 | 3 | 3 | 3 | 2 |
| 2 | 4 | 2 | 2 | 3 | 3 | 3 | 3 | 3 |
| 3 | 1 | 2 | 4 | 2 | 2 | 3 | 2 | 5 |
| 2 | 3 | 3 | 5 | 2 | 2 | 3 | 3 | 4 |
| 2 | 2 | 4 | 4 | 4 | 4 | 4 | 2 | 4 |
| 4 | 3 | 4 | 4 | 3 | 3 | 3 | 3 | 5 |
| 2 | 2 | 4 | 4 | 2 | 4 | 4 | 2 | 4 |
| 2 | 2 | 3 | 4 | 2 | 2 | 3 | 3 | 2 |
| 4 | 2 | 4 | 4 | 4 | 4 | 4 | 2 | 4 |
| 2 | 2 | 4 | 4 | 2 | 3 | 3 | 3 | 3 |
| 3 | 3 | 3 | 3 | 3 | 3 | 3 | 3 | 3 |
| 2 | 2 | 4 | 4 | 2 | 2 | 4 | 2 | 4 |
| 2 | 3 | 4 | 4 | 2 | 4 | 3 | 3 | 4 |
| 2 | 2 | 4 | 4 | 5 | 4 | 3 | 3 | 3 |
| 4 | 2 | 4 | 4 | 4 | 4 | 4 | 3 | 4 |
| 3 | 3 | 3 | 3 | 3 | 3 | 3 | 3 | 3 |
| 2 | 4 | 4 | 4 | 3 | 3 | 4 | 4 | 4 |
| 2 | 2 | 5 | 5 | 5 | 5 | 5 | 2 | 3 |
| 4 | 1 | 5 | 5 | 4 | 4 | 4 | 2 | 4 |
| 2 | 4 | 3 | 3 | 2 | 2 | 3 | 5 | 5 |
| 2 | 3 | 3 | 4 | 2 | 3 | 3 | 3 | 4 |
| 5 | 1 | 5 | 5 | 5 | 5 | 5 | 1 | 5 |
| 2 | 4 | 3 | 4 | 2 | 2 | 3 | 4 | 4 |
| 4 | 2 | 4 | 4 | 4 | 4 | 4 | 2 | 4 |
| 4 | 2 | 4 | 4 | 4 | 4 | 4 | 3 | 4 |
| 2 | 3 | 4 | 4 | 2 | 3 | 4 | 3 | 3 |
| 3 | 2 | 4 | 5 | 3 | 4 | 3 | 2 | 4 |
| 4 | 2 | 4 | 4 | 4 | 4 | 4 | 2 | 2 |
| 3 | 3 | 3 | 3 | 3 | 3 | 3 | 3 | 3 |
| 4 | 3 | 5 | 4 | 2 | 3 | 3 | 3 | 4 |

|   |   |   |   |   |   |   |   |   |
|---|---|---|---|---|---|---|---|---|
| 2 | 3 | 5 | 5 | 2 | 3 | 4 | 3 | 5 |
| 3 | 3 | 4 | 5 | 4 | 2 | 2 | 4 | 4 |
| 1 | 1 | 3 | 5 | 3 | 3 | 3 | 3 | 2 |
| 3 | 2 | 4 | 4 | 3 | 4 | 4 | 2 | 4 |
| 2 | 4 | 3 | 3 | 3 | 2 | 2 | 4 | 4 |
| 1 | 4 | 5 | 5 | 5 | 1 | 4 | 5 | 4 |
| 4 | 2 | 2 | 4 | 2 | 2 | 3 | 5 | 5 |
| 2 | 3 | 3 | 3 | 2 | 3 | 3 | 3 | 3 |
| 3 | 1 | 5 | 5 | 2 | 5 | 3 | 2 | 5 |
| 5 | 5 | 5 | 5 | 5 | 5 | 5 | 2 | 5 |
| 4 | 2 | 4 | 4 | 2 | 4 | 4 | 2 | 4 |
| 1 | 1 | 1 | 1 | 1 | 1 | 1 | 1 | 1 |
| 2 | 2 | 4 | 5 | 4 | 4 | 5 | 2 | 2 |
| 2 | 4 | 4 | 5 | 2 | 2 | 3 | 4 | 3 |
| 3 | 2 | 4 | 4 | 5 | 5 | 5 | 2 | 2 |
| 3 | 3 | 5 | 4 | 3 | 2 | 2 | 3 | 5 |
| 3 | 2 | 2 | 4 | 4 | 4 | 4 | 3 | 4 |
| 4 | 5 | 3 | 4 | 3 | 2 | 1 | 4 | 5 |
| 3 | 2 | 4 | 4 | 2 | 3 | 4 | 3 | 4 |
| 1 | 4 | 2 | 1 | 3 | 2 | 3 | 4 | 1 |
| 5 | 5 | 5 | 5 | 5 | 5 | 5 | 5 | 5 |
| 3 | 3 | 3 | 3 | 3 | 3 | 3 | 3 | 3 |
| 2 | 3 | 4 | 4 | 3 | 4 | 3 | 3 | 4 |
| 4 | 3 | 4 | 5 | 4 | 3 | 3 | 3 | 2 |
| 4 | 2 | 4 | 4 | 4 | 4 | 4 | 2 | 4 |
| 2 | 4 | 5 | 5 | 2 | 2 | 4 | 5 | 5 |
| 3 | 3 | 4 | 4 | 3 | 3 | 3 | 3 | 4 |
| 1 | 5 | 1 | 5 | 1 | 1 | 1 | 5 | 2 |
| 2 | 4 | 4 | 4 | 2 | 2 | 2 | 4 | 2 |
| 1 | 2 | 2 | 5 | 2 | 2 | 4 | 4 | 3 |
| 3 | 1 | 4 | 5 | 4 | 3 | 4 | 3 | 4 |
| 3 | 2 | 4 | 4 | 3 | 3 | 4 | 3 | 4 |
| 2 | 2 | 4 | 4 | 2 | 3 | 4 | 3 | 3 |
| 5 | 1 | 1 | 5 | 5 | 5 | 5 | 5 | 5 |
| 1 | 3 | 4 | 4 | 4 | 4 | 4 | 4 | 3 |
| 2 | 2 | 4 | 4 | 4 | 4 | 4 | 2 | 2 |
| 3 | 4 | 4 | 4 | 3 | 4 | 4 | 3 | 4 |
| 3 | 3 | 3 | 3 | 3 | 3 | 3 | 4 | 4 |
| 2 | 4 | 4 | 4 | 2 | 2 | 2 | 2 | 4 |
| 2 | 3 | 3 | 4 | 2 | 2 | 3 | 3 | 2 |
| 3 | 1 | 5 | 5 | 4 | 5 | 5 | 1 | 3 |
| 3 | 2 | 4 | 4 | 4 | 4 | 4 | 2 | 3 |
| 4 | 3 | 3 | 5 | 4 | 4 | 4 | 4 | 4 |
| 2 | 2 | 3 | 4 | 3 | 3 | 3 | 2 | 2 |
| 4 | 4 | 4 | 5 | 3 | 3 | 4 | 2 | 5 |
| 2 | 3 | 4 | 4 | 2 | 2 | 2 | 3 | 4 |
| 4 | 2 | 4 | 5 | 2 | 3 | 4 | 3 | 4 |
| 2 | 3 | 3 | 4 | 2 | 3 | 3 | 3 | 2 |
| 5 | 3 | 2 | 2 | 3 | 3 | 3 | 3 | 1 |
| 2 | 2 | 4 | 4 | 3 | 3 | 3 | 3 | 4 |
| 4 | 2 | 4 | 4 | 2 | 2 | 4 | 2 | 4 |
| 4 | 1 | 5 | 5 | 2 | 5 | 5 | 2 | 5 |
| 3 | 1 | 4 | 5 | 3 | 3 | 3 | 2 | 4 |
| 1 | 1 | 5 | 5 | 4 | 2 | 5 | 2 | 4 |

|   |   |   |   |   |   |   |   |   |
|---|---|---|---|---|---|---|---|---|
| 2 | 3 | 3 | 4 | 2 | 4 | 3 | 3 | 4 |
| 4 | 2 | 4 | 4 | 4 | 4 | 4 | 4 | 4 |
| 3 | 3 | 4 | 4 | 3 | 3 | 4 | 3 | 4 |
| 3 | 3 | 4 | 4 | 3 | 3 | 3 | 3 | 4 |
| 4 | 3 | 4 | 4 | 4 | 4 | 3 | 3 | 3 |
| 2 | 2 | 4 | 4 | 3 | 3 | 4 | 3 | 3 |
| 3 | 4 | 4 | 5 | 3 | 5 | 3 | 5 | 5 |
| 3 | 1 | 5 | 5 | 2 | 5 | 5 | 3 | 5 |
| 2 | 2 | 5 | 3 | 3 | 5 | 5 | 2 | 1 |
| 1 | 1 | 4 | 5 | 2 | 4 | 4 | 2 | 1 |
| 1 | 1 | 5 | 5 | 3 | 5 | 5 | 1 | 1 |
| 4 | 1 | 4 | 4 | 2 | 4 | 3 | 3 | 5 |
| 1 | 1 | 5 | 5 | 5 | 3 | 3 | 2 | 3 |
| 4 | 2 | 4 | 4 | 4 | 4 | 4 | 2 | 4 |
| 2 | 1 | 5 | 4 | 3 | 5 | 5 | 2 | 3 |
| 3 | 2 | 4 | 4 | 2 | 2 | 4 | 2 | 4 |
| 2 | 1 | 5 | 5 | 3 | 5 | 5 | 1 | 4 |
| 4 | 2 | 4 | 4 | 3 | 4 | 4 | 2 | 4 |
| 2 | 3 | 4 | 4 | 5 | 3 | 4 | 3 | 2 |
| 3 | 5 | 2 | 5 | 1 | 2 | 2 | 5 | 5 |
| 2 | 2 | 5 | 5 | 4 | 3 | 4 | 1 | 4 |
| 2 | 3 | 4 | 4 | 3 | 3 | 3 | 2 | 4 |
| 1 | 1 | 5 | 5 | 5 | 5 | 5 | 5 | 5 |
| 1 | 1 | 5 | 5 | 5 | 5 | 5 | 1 | 2 |
| 5 | 1 | 5 | 5 | 5 | 5 | 5 | 1 | 5 |
| 1 | 4 | 4 | 5 | 3 | 2 | 2 | 5 | 5 |
| 4 | 1 | 5 | 5 | 4 | 4 | 4 | 2 | 4 |
| 1 | 1 | 5 | 5 | 5 | 5 | 5 | 1 | 5 |
| 4 | 3 | 4 | 5 | 4 | 3 | 3 | 3 | 5 |
| 1 | 1 | 5 | 5 | 5 | 5 | 5 | 1 | 5 |
| 5 | 2 | 4 | 5 | 4 | 4 | 3 | 3 | 5 |
| 1 | 1 | 5 | 3 | 4 | 4 | 5 | 4 | 3 |
| 2 | 3 | 3 | 3 | 3 | 3 | 3 | 3 | 5 |
| 1 | 1 | 5 | 5 | 3 | 5 | 5 | 1 | 3 |
| 2 | 3 | 5 | 5 | 2 | 3 | 3 | 4 | 4 |
| 5 | 2 | 5 | 5 | 2 | 4 | 4 | 4 | 5 |
| 2 | 2 | 4 | 4 | 2 | 3 | 4 | 3 | 2 |
| 1 | 5 | 2 | 3 | 1 | 1 | 1 | 5 | 3 |
| 3 | 3 | 3 | 3 | 3 | 3 | 3 | 3 | 3 |
| 3 | 2 | 5 | 5 | 2 | 4 | 4 | 1 | 5 |
| 4 | 1 | 5 | 5 | 4 | 5 | 5 | 1 | 5 |
| 4 | 3 | 4 | 4 | 4 | 4 | 4 | 3 | 4 |
| 3 | 3 | 3 | 3 | 3 | 3 | 3 | 3 | 3 |
| 3 | 3 | 4 | 3 | 3 | 3 | 4 | 2 | 4 |
| 3 | 4 | 4 | 3 | 2 | 2 | 2 | 2 | 3 |
| 2 | 4 | 5 | 5 | 2 | 2 | 3 | 3 | 4 |
| 2 | 1 | 5 | 5 | 3 | 3 | 4 | 4 | 2 |
| 3 | 3 | 4 | 4 | 3 | 3 | 3 | 4 | 4 |
| 4 | 2 | 4 | 5 | 4 | 4 | 4 | 2 | 5 |
| 2 | 2 | 4 | 5 | 3 | 3 | 4 | 3 | 4 |
| 1 | 5 | 3 | 5 | 5 | 2 | 4 | 2 | 5 |
| 4 | 1 | 5 | 5 | 3 | 4 | 5 | 1 | 5 |
| 2 | 3 | 4 | 5 | 4 | 4 | 4 | 3 | 1 |
| 3 | 1 | 5 | 5 | 3 | 5 | 5 | 2 | 5 |

|   |   |   |   |   |   |   |   |   |
|---|---|---|---|---|---|---|---|---|
| 2 | 1 | 3 | 3 | 4 | 3 | 4 | 4 | 5 |
| 3 | 2 | 5 | 5 | 2 | 5 | 5 | 5 | 4 |
| 1 | 2 | 3 | 4 | 3 | 3 | 3 | 2 | 5 |
| 1 | 5 | 1 | 1 | 1 | 1 | 1 | 5 | 3 |
| 4 | 3 | 5 | 5 | 2 | 2 | 3 | 3 | 3 |
| 4 | 4 | 3 | 3 | 1 | 2 | 2 | 3 | 2 |
| 3 | 3 | 4 | 4 | 2 | 3 | 2 | 3 | 4 |
| 5 | 4 | 3 | 5 | 1 | 3 | 3 | 2 | 4 |
| 2 | 1 | 4 | 4 | 4 | 3 | 4 | 3 | 2 |
| 3 | 3 | 3 | 4 | 1 | 2 | 3 | 3 | 4 |
| 3 | 2 | 5 | 5 | 4 | 5 | 5 | 3 | 5 |
| 1 | 3 | 3 | 3 | 3 | 3 | 3 | 4 | 2 |
| 1 | 3 | 4 | 5 | 3 | 4 | 4 | 2 | 5 |
| 4 | 1 | 5 | 5 | 5 | 5 | 5 | 1 | 4 |
| 4 | 1 | 5 | 5 | 5 | 5 | 5 | 1 | 5 |
| 3 | 3 | 4 | 3 | 3 | 3 | 3 | 3 | 3 |
| 2 | 2 | 4 | 5 | 3 | 4 | 4 | 4 | 1 |
| 3 | 1 | 5 | 5 | 3 | 4 | 5 | 2 | 4 |
| 2 | 1 | 4 | 4 | 3 | 4 | 4 | 3 | 2 |
| 3 | 3 | 4 | 4 | 2 | 2 | 4 | 2 | 4 |
| 4 | 3 | 4 | 4 | 4 | 3 | 3 | 4 | 4 |
| 2 | 4 | 3 | 3 | 2 | 2 | 4 | 3 | 3 |
| 5 | 5 | 5 | 5 | 5 | 5 | 5 | 5 | 5 |
| 2 | 3 | 3 | 5 | 5 | 5 | 5 | 5 | 2 |
| 4 | 3 | 3 | 5 | 3 | 2 | 4 | 4 | 4 |
| 3 | 3 | 3 | 3 | 3 | 3 | 3 | 3 | 4 |
| 2 | 3 | 3 | 3 | 3 | 3 | 3 | 3 | 3 |
| 3 | 1 | 5 | 4 | 4 | 4 | 4 | 1 | 4 |
| 3 | 3 | 3 | 3 | 3 | 3 | 3 | 3 | 3 |
| 2 | 2 | 4 | 4 | 4 | 4 | 4 | 3 | 2 |
| 3 | 3 | 3 | 3 | 3 | 3 | 3 | 3 | 3 |
| 2 | 4 | 3 | 4 | 3 | 2 | 3 | 4 | 2 |
| 2 | 4 | 4 | 4 | 2 | 2 | 3 | 3 | 4 |
| 3 | 3 | 3 | 4 | 3 | 4 | 4 | 3 | 3 |
| 3 | 3 | 4 | 4 | 4 | 4 | 4 | 3 | 3 |
| 3 | 2 | 4 | 4 | 4 | 4 | 4 | 2 | 4 |
| 4 | 2 | 5 | 5 | 4 | 4 | 4 | 2 | 5 |
| 3 | 2 | 3 | 3 | 3 | 4 | 4 | 2 | 4 |
| 3 | 2 | 4 | 4 | 4 | 4 | 4 | 3 | 3 |
| 3 | 3 | 3 | 3 | 3 | 3 | 3 | 3 | 3 |
| 1 | 2 | 4 | 4 | 4 | 4 | 4 | 2 | 3 |
| 3 | 2 | 5 | 4 | 2 | 4 | 4 | 3 | 2 |
| 3 | 2 | 4 | 3 | 3 | 3 | 3 | 3 | 4 |
| 2 | 2 | 4 | 5 | 4 | 4 | 4 | 2 | 2 |
| 3 | 3 | 3 | 3 | 2 | 3 | 2 | 3 | 2 |
| 5 | 4 | 5 | 4 | 5 | 5 | 4 | 4 | 4 |
| 2 | 1 | 4 | 5 | 3 | 5 | 4 | 2 | 2 |
| 2 | 1 | 4 | 5 | 3 | 4 | 4 | 2 | 2 |
| 2 | 2 | 4 | 4 | 3 | 4 | 4 | 2 | 4 |
| 3 | 2 | 4 | 5 | 4 | 4 | 4 | 2 | 3 |
| 3 | 1 | 5 | 5 | 4 | 5 | 4 | 1 | 5 |
| 2 | 2 | 5 | 4 | 2 | 4 | 4 | 3 | 4 |
| 4 | 1 | 5 | 5 | 4 | 4 | 5 | 4 | 5 |
| 2 | 1 | 5 | 5 | 2 | 5 | 4 | 2 | 4 |

|   |   |   |   |   |   |   |   |   |
|---|---|---|---|---|---|---|---|---|
| 3 | 2 | 4 | 4 | 3 | 4 | 3 | 3 | 3 |
| 2 | 2 | 4 | 5 | 4 | 4 | 4 | 2 | 2 |
| 3 | 2 | 4 | 4 | 3 | 3 | 4 | 4 | 4 |
| 2 | 2 | 5 | 5 | 4 | 5 | 5 | 4 | 4 |
| 2 | 1 | 5 | 5 | 4 | 4 | 5 | 1 | 4 |
| 2 | 1 | 5 | 5 | 2 | 5 | 4 | 2 | 4 |

| C33 | C34 | C35 | C36 | C37 | C38 | C39 | C40 | C41 |   |
|-----|-----|-----|-----|-----|-----|-----|-----|-----|---|
| 5   | 5   | 5   | 5   | 5   | 5   | 5   | 1   | 5   | 5 |
| 3   | 1   | 4   | 5   | 4   | 4   | 4   | 5   | 4   | 4 |
| 5   | 5   | 5   | 5   | 5   | 5   | 5   | 5   | 5   | 5 |
| 5   | 5   | 5   | 5   | 5   | 5   | 5   | 5   | 5   | 5 |
| 3   | 3   | 3   | 3   | 3   | 3   | 3   | 3   | 3   | 3 |
| 5   | 5   | 5   | 5   | 5   | 5   | 5   | 5   | 5   | 5 |
| 5   | 5   | 5   | 5   | 5   | 5   | 5   | 5   | 5   | 5 |
| 5   | 5   | 4   | 5   | 3   | 5   | 4   | 5   | 5   | 5 |
| 4   | 4   | 4   | 4   | 4   | 4   | 4   | 4   | 2   | 2 |
| 5   | 5   | 4   | 5   | 5   | 4   | 3   | 5   | 5   | 5 |
| 3   | 2   | 5   | 4   | 5   | 5   | 4   | 3   | 2   | 2 |
| 2   | 2   | 3   | 4   | 4   | 3   | 3   | 3   | 3   | 2 |
| 2   | 2   | 5   | 5   | 5   | 5   | 5   | 2   | 2   | 1 |
| 5   | 5   | 5   | 5   | 5   | 5   | 5   | 5   | 5   | 5 |
| 3   | 5   | 5   | 3   | 5   | 2   | 5   | 3   | 5   | 5 |
| 5   | 5   | 5   | 5   | 5   | 5   | 5   | 5   | 5   | 5 |
| 1   | 1   | 4   | 3   | 3   | 3   | 4   | 4   | 1   | 1 |
| 5   | 5   | 5   | 5   | 5   | 5   | 5   | 5   | 3   | 3 |
| 2   | 2   | 4   | 4   | 3   | 4   | 3   | 3   | 2   | 2 |
| 2   | 1   | 4   | 3   | 5   | 5   | 3   | 2   | 3   | 3 |
| 5   | 5   | 5   | 5   | 5   | 5   | 5   | 5   | 5   | 5 |
| 5   | 5   | 5   | 5   | 3   | 5   | 5   | 5   | 5   | 5 |
| 1   | 1   | 5   | 5   | 5   | 5   | 5   | 1   | 4   | 1 |
| 1   | 1   | 5   | 4   | 5   | 5   | 5   | 1   | 1   | 1 |
| 3   | 4   | 4   | 4   | 2   | 2   | 4   | 4   | 4   | 4 |
| 2   | 2   | 4   | 4   | 4   | 4   | 4   | 2   | 2   | 2 |
| 1   | 1   | 3   | 3   | 3   | 3   | 3   | 1   | 1   | 3 |
| 3   | 2   | 4   | 4   | 3   | 4   | 3   | 3   | 3   | 2 |
| 5   | 1   | 5   | 4   | 4   | 4   | 4   | 3   | 2   | 1 |
| 3   | 2   | 4   | 3   | 2   | 4   | 4   | 4   | 3   | 4 |
| 1   | 1   | 5   | 5   | 5   | 5   | 5   | 2   | 2   | 1 |
| 1   | 1   | 5   | 5   | 5   | 5   | 5   | 1   | 1   | 1 |
| 1   | 1   | 5   | 4   | 4   | 4   | 4   | 2   | 2   | 2 |
| 5   | 5   | 5   | 4   | 5   | 5   | 5   | 5   | 5   | 4 |
| 1   | 1   | 5   | 4   | 4   | 4   | 4   | 3   | 3   | 1 |
| 3   | 3   | 3   | 3   | 3   | 3   | 3   | 3   | 3   | 1 |
| 2   | 2   | 5   | 1   | 5   | 5   | 5   | 5   | 5   | 2 |
| 5   | 5   | 5   | 5   | 5   | 5   | 5   | 5   | 5   | 5 |
| 1   | 2   | 5   | 5   | 5   | 5   | 5   | 2   | 5   | 1 |
| 1   | 1   | 5   | 5   | 5   | 5   | 5   | 2   | 5   | 1 |
| 1   | 1   | 4   | 1   | 4   | 4   | 4   | 2   | 2   | 1 |
| 1   | 1   | 4   | 4   | 4   | 4   | 4   | 2   | 4   | 2 |
| 1   | 1   | 1   | 5   | 5   | 5   | 5   | 2   | 5   | 2 |
| 1   | 1   | 5   | 3   | 4   | 3   | 2   | 2   | 2   | 1 |
| 2   | 3   | 4   | 4   | 4   | 4   | 4   | 4   | 4   | 2 |
| 4   | 4   | 4   | 4   | 4   | 4   | 4   | 4   | 4   | 4 |
| 1   | 2   | 5   | 4   | 5   | 5   | 5   | 1   | 3   | 2 |
| 5   | 5   | 5   | 5   | 5   | 5   | 5   | 5   | 5   | 5 |
| 3   | 2   | 3   | 2   | 2   | 2   | 2   | 2   | 2   | 2 |
| 4   | 4   | 1   | 4   | 5   | 3   | 2   | 4   | 2   | 2 |
| 5   | 5   | 5   | 5   | 5   | 5   | 5   | 5   | 5   | 5 |
| 1   | 1   | 5   | 5   | 5   | 5   | 5   | 3   | 5   | 1 |
| 3   | 2   | 4   | 3   | 5   | 3   | 3   | 5   | 3   | 3 |

|   |   |   |   |   |   |   |   |   |
|---|---|---|---|---|---|---|---|---|
| 3 | 3 | 3 | 3 | 3 | 3 | 3 | 3 | 3 |
| 3 | 2 | 4 | 3 | 3 | 4 | 3 | 4 | 3 |
| 5 | 5 | 5 | 4 | 3 | 3 | 3 | 3 | 3 |
| 5 | 5 | 5 | 5 | 5 | 5 | 5 | 5 | 5 |
| 5 | 2 | 5 | 3 | 5 | 5 | 2 | 5 | 2 |
| 2 | 1 | 5 | 4 | 4 | 4 | 1 | 4 | 1 |
| 1 | 1 | 5 | 5 | 5 | 5 | 1 | 2 | 1 |
| 1 | 1 | 5 | 5 | 5 | 5 | 1 | 5 | 5 |
| 3 | 2 | 4 | 4 | 4 | 4 | 4 | 2 | 2 |
| 2 | 2 | 5 | 4 | 4 | 4 | 5 | 4 | 4 |
| 2 | 2 | 4 | 2 | 2 | 4 | 2 | 2 | 2 |
| 4 | 2 | 5 | 3 | 4 | 4 | 4 | 4 | 3 |
| 1 | 1 | 5 | 5 | 5 | 5 | 3 | 3 | 1 |
| 2 | 5 | 5 | 5 | 3 | 4 | 4 | 3 | 2 |
| 2 | 2 | 4 | 4 | 4 | 4 | 2 | 4 | 2 |
| 3 | 1 | 5 | 4 | 5 | 5 | 2 | 3 | 1 |
| 1 | 1 | 1 | 5 | 5 | 5 | 1 | 1 | 1 |
| 1 | 2 | 5 | 3 | 5 | 5 | 1 | 2 | 1 |
| 1 | 1 | 1 | 4 | 4 | 4 | 3 | 2 | 1 |
| 3 | 2 | 4 | 3 | 3 | 4 | 3 | 3 | 2 |
| 2 | 1 | 4 | 4 | 4 | 5 | 2 | 4 | 2 |
| 2 | 2 | 4 | 3 | 4 | 4 | 4 | 4 | 2 |
| 3 | 3 | 5 | 3 | 5 | 5 | 3 | 3 | 3 |
| 3 | 3 | 3 | 4 | 3 | 3 | 3 | 3 | 3 |
| 3 | 3 | 3 | 3 | 3 | 3 | 3 | 3 | 3 |
| 3 | 2 | 3 | 1 | 2 | 2 | 4 | 5 | 4 |
| 2 | 1 | 4 | 3 | 4 | 5 | 3 | 4 | 2 |
| 3 | 1 | 3 | 3 | 3 | 3 | 3 | 3 | 3 |
| 3 | 2 | 3 | 3 | 3 | 3 | 3 | 3 | 2 |
| 3 | 3 | 3 | 3 | 3 | 3 | 3 | 3 | 3 |
| 3 | 3 | 3 | 3 | 3 | 3 | 3 | 3 | 4 |
| 3 | 2 | 4 | 3 | 3 | 3 | 4 | 3 | 2 |
| 1 | 1 | 5 | 5 | 5 | 5 | 2 | 2 | 1 |
| 3 | 1 | 3 | 3 | 3 | 3 | 3 | 3 | 3 |
| 2 | 2 | 2 | 3 | 4 | 4 | 3 | 4 | 1 |
| 1 | 1 | 5 | 4 | 5 | 5 | 2 | 2 | 2 |
| 1 | 1 | 5 | 5 | 5 | 5 | 2 | 1 | 1 |
| 2 | 1 | 5 | 2 | 3 | 3 | 2 | 2 | 1 |
| 4 | 4 | 3 | 3 | 2 | 5 | 3 | 4 | 5 |
| 1 | 1 | 5 | 3 | 5 | 5 | 3 | 5 | 1 |
| 4 | 2 | 4 | 2 | 2 | 3 | 3 | 3 | 3 |
| 2 | 2 | 4 | 4 | 4 | 4 | 2 | 2 | 2 |
| 2 | 3 | 3 | 3 | 3 | 3 | 3 | 3 | 2 |
| 1 | 1 | 5 | 5 | 4 | 5 | 1 | 3 | 1 |
| 1 | 1 | 5 | 4 | 4 | 4 | 4 | 4 | 2 |
| 3 | 3 | 5 | 5 | 4 | 3 | 1 | 3 | 3 |
| 4 | 4 | 5 | 3 | 4 | 4 | 4 | 4 | 5 |
| 4 | 2 | 5 | 3 | 3 | 3 | 3 | 3 | 3 |
| 1 | 1 | 5 | 4 | 5 | 5 | 2 | 3 | 1 |
| 5 | 1 | 4 | 3 | 3 | 2 | 5 | 3 | 4 |
| 4 | 2 | 4 | 4 | 4 | 4 | 4 | 4 | 4 |
| 2 | 2 | 4 | 4 | 5 | 5 | 1 | 3 | 1 |
| 2 | 2 | 2 | 2 | 2 | 2 | 2 | 2 | 2 |
| 4 | 2 | 4 | 2 | 3 | 2 | 4 | 4 | 4 |

|   |   |   |   |   |   |   |   |   |
|---|---|---|---|---|---|---|---|---|
| 3 | 3 | 3 | 3 | 3 | 3 | 3 | 3 | 3 |
| 4 | 5 | 4 | 1 | 1 | 1 | 5 | 2 | 4 |
| 3 | 1 | 5 | 4 | 4 | 4 | 4 | 4 | 1 |
| 1 | 1 | 5 | 5 | 5 | 5 | 5 | 5 | 1 |
| 1 | 5 | 5 | 5 | 5 | 5 | 3 | 1 | 1 |
| 4 | 1 | 5 | 4 | 5 | 5 | 5 | 4 | 4 |
| 3 | 2 | 5 | 3 | 3 | 4 | 5 | 4 | 3 |
| 2 | 2 | 5 | 3 | 5 | 5 | 2 | 4 | 2 |
| 1 | 1 | 5 | 5 | 5 | 5 | 2 | 4 | 1 |
| 3 | 3 | 3 | 3 | 3 | 3 | 3 | 3 | 3 |
| 3 | 3 | 3 | 3 | 3 | 3 | 3 | 3 | 3 |
| 1 | 1 | 5 | 5 | 4 | 4 | 2 | 4 | 1 |
| 1 | 1 | 5 | 2 | 4 | 4 | 1 | 1 | 1 |
| 2 | 1 | 5 | 1 | 4 | 5 | 1 | 4 | 1 |
| 2 | 2 | 4 | 2 | 4 | 4 | 2 | 2 | 2 |
| 2 | 2 | 4 | 3 | 3 | 4 | 4 | 2 | 2 |
| 2 | 1 | 5 | 4 | 5 | 5 | 3 | 4 | 2 |
| 2 | 2 | 4 | 2 | 5 | 5 | 2 | 5 | 2 |
| 1 | 1 | 4 | 2 | 4 | 5 | 1 | 1 | 2 |
| 2 | 2 | 2 | 3 | 2 | 4 | 4 | 4 | 4 |
| 2 | 1 | 3 | 4 | 4 | 4 | 4 | 2 | 2 |
| 1 | 1 | 5 | 5 | 1 | 5 | 1 | 5 | 1 |
| 2 | 2 | 3 | 3 | 3 | 3 | 3 | 3 | 3 |
| 3 | 3 | 3 | 3 | 3 | 3 | 3 | 3 | 3 |
| 4 | 2 | 2 | 2 | 2 | 2 | 4 | 4 | 4 |
| 4 | 1 | 4 | 2 | 1 | 3 | 3 | 2 | 3 |
| 4 | 2 | 3 | 3 | 2 | 3 | 5 | 3 | 3 |
| 4 | 2 | 4 | 2 | 3 | 3 | 4 | 3 | 4 |
| 3 | 3 | 4 | 2 | 3 | 3 | 2 | 4 | 2 |
| 1 | 1 | 5 | 4 | 5 | 5 | 2 | 1 | 1 |
| 2 | 2 | 4 | 4 | 2 | 4 | 2 | 2 | 1 |
| 2 | 2 | 5 | 3 | 4 | 5 | 2 | 2 | 3 |
| 2 | 3 | 4 | 3 | 2 | 3 | 4 | 3 | 5 |
| 1 | 1 | 5 | 1 | 1 | 1 | 5 | 1 | 5 |
| 2 | 1 | 1 | 3 | 4 | 4 | 2 | 2 | 2 |
| 1 | 1 | 5 | 4 | 4 | 4 | 2 | 1 | 1 |
| 1 | 3 | 4 | 3 | 4 | 4 | 2 | 2 | 1 |
| 2 | 1 | 5 | 2 | 4 | 4 | 4 | 2 | 2 |
| 1 | 1 | 5 | 3 | 3 | 4 | 3 | 1 | 1 |
| 3 | 4 | 4 | 4 | 5 | 4 | 5 | 5 | 4 |
| 2 | 1 | 5 | 3 | 5 | 5 | 3 | 4 | 1 |
| 4 | 3 | 3 | 1 | 1 | 5 | 5 | 3 | 5 |
| 3 | 3 | 3 | 3 | 3 | 3 | 3 | 3 | 3 |
| 5 | 5 | 4 | 3 | 3 | 3 | 4 | 4 | 5 |
| 1 | 1 | 1 | 3 | 3 | 5 | 3 | 3 | 1 |
| 1 | 1 | 5 | 5 | 5 | 5 | 4 | 4 | 1 |
| 5 | 2 | 4 | 1 | 1 | 1 | 4 | 1 | 3 |
| 1 | 1 | 5 | 5 | 4 | 5 | 1 | 3 | 1 |
| 1 | 1 | 5 | 4 | 4 | 5 | 4 | 2 | 2 |
| 4 | 2 | 4 | 2 | 2 | 2 | 4 | 3 | 4 |
| 1 | 1 | 5 | 5 | 5 | 5 | 2 | 1 | 1 |
| 3 | 5 | 5 | 3 | 5 | 5 | 5 | 4 | 3 |
| 3 | 2 | 4 | 2 | 4 | 4 | 3 | 3 | 4 |
| 2 | 2 | 4 | 3 | 4 | 4 | 2 | 2 | 2 |



|   |   |   |   |   |   |   |   |   |
|---|---|---|---|---|---|---|---|---|
| 1 | 1 | 4 | 3 | 5 | 5 | 4 | 1 | 1 |
| 3 | 3 | 4 | 3 | 3 | 4 | 3 | 3 | 1 |
| 1 | 1 | 5 | 5 | 5 | 5 | 1 | 5 | 1 |
| 3 | 2 | 4 | 3 | 2 | 3 | 3 | 3 | 3 |
| 1 | 1 | 4 | 5 | 2 | 5 | 3 | 1 | 1 |
| 2 | 2 | 4 | 4 | 4 | 4 | 4 | 2 | 2 |
| 2 | 2 | 4 | 4 | 4 | 4 | 3 | 3 | 2 |
| 2 | 2 | 4 | 4 | 4 | 4 | 2 | 2 | 2 |
| 4 | 3 | 3 | 2 | 2 | 2 | 4 | 3 | 4 |
| 2 | 1 | 5 | 5 | 2 | 3 | 2 | 3 | 1 |
| 3 | 2 | 4 | 3 | 5 | 5 | 2 | 5 | 3 |
| 1 | 1 | 5 | 1 | 5 | 5 | 1 | 1 | 1 |
| 3 | 3 | 3 | 3 | 3 | 3 | 3 | 3 | 3 |
| 1 | 1 | 1 | 5 | 5 | 5 | 1 | 3 | 1 |
| 2 | 2 | 3 | 3 | 3 | 3 | 3 | 3 | 2 |
| 3 | 1 | 4 | 4 | 4 | 4 | 4 | 4 | 1 |
| 1 | 1 | 5 | 4 | 4 | 4 | 4 | 4 | 1 |
| 2 | 2 | 4 | 4 | 4 | 3 | 3 | 2 | 2 |
| 4 | 2 | 4 | 2 | 3 | 2 | 5 | 5 | 4 |
| 1 | 1 | 5 | 1 | 4 | 5 | 3 | 5 | 1 |
| 4 | 2 | 5 | 3 | 3 | 3 | 4 | 4 | 4 |
| 1 | 1 | 5 | 5 | 5 | 5 | 2 | 4 | 1 |
| 2 | 1 | 5 | 3 | 5 | 5 | 4 | 1 | 1 |
| 1 | 1 | 5 | 3 | 4 | 5 | 2 | 4 | 1 |
| 3 | 3 | 3 | 3 | 3 | 3 | 3 | 3 | 3 |
| 3 | 3 | 4 | 2 | 3 | 5 | 2 | 4 | 4 |
| 2 | 2 | 2 | 3 | 4 | 4 | 3 | 2 | 2 |
| 3 | 3 | 3 | 3 | 3 | 3 | 3 | 3 | 3 |
| 4 | 4 | 4 | 1 | 1 | 1 | 5 | 1 | 5 |
| 5 | 5 | 1 | 1 | 4 | 5 | 1 | 1 | 1 |
| 2 | 2 | 4 | 3 | 4 | 4 | 4 | 4 | 2 |
| 1 | 1 | 5 | 5 | 5 | 5 | 1 | 2 | 1 |
| 1 | 1 | 5 | 5 | 3 | 5 | 1 | 1 | 1 |
| 2 | 1 | 3 | 2 | 3 | 4 | 1 | 1 | 1 |
| 1 | 1 | 5 | 4 | 3 | 3 | 3 | 3 | 3 |
| 1 | 1 | 5 | 5 | 4 | 3 | 2 | 4 | 1 |
| 3 | 2 | 4 | 3 | 3 | 4 | 4 | 4 | 3 |
| 1 | 1 | 3 | 4 | 5 | 5 | 2 | 4 | 1 |
| 2 | 2 | 3 | 4 | 4 | 4 | 2 | 4 | 1 |
| 1 | 1 | 4 | 5 | 5 | 5 | 4 | 4 | 2 |
| 3 | 1 | 5 | 3 | 5 | 5 | 4 | 4 | 3 |
| 2 | 2 | 4 | 4 | 4 | 4 | 4 | 4 | 2 |
| 2 | 1 | 5 | 5 | 5 | 5 | 5 | 2 | 5 |
| 2 | 2 | 4 | 3 | 2 | 4 | 2 | 3 | 2 |
| 3 | 2 | 3 | 3 | 3 | 3 | 3 | 2 | 3 |
| 2 | 1 | 4 | 3 | 3 | 3 | 4 | 4 | 2 |
| 3 | 3 | 3 | 3 | 3 | 3 | 3 | 3 | 3 |
| 1 | 1 | 5 | 5 | 5 | 5 | 1 | 2 | 1 |
| 1 | 1 | 5 | 5 | 5 | 5 | 4 | 4 | 1 |
| 1 | 1 | 5 | 5 | 5 | 5 | 1 | 1 | 1 |
| 1 | 1 | 4 | 4 | 2 | 4 | 2 | 2 | 1 |
| 1 | 3 | 3 | 3 | 4 | 3 | 2 | 1 | 1 |
| 3 | 3 | 2 | 3 | 3 | 3 | 3 | 3 | 3 |
| 2 | 1 | 5 | 5 | 5 | 5 | 3 | 4 | 1 |

|   |   |   |   |   |   |   |   |   |
|---|---|---|---|---|---|---|---|---|
| 3 | 3 | 3 | 3 | 3 | 3 | 3 | 3 | 3 |
| 3 | 4 | 3 | 4 | 3 | 4 | 2 | 2 | 1 |
| 1 | 1 | 4 | 4 | 4 | 4 | 4 | 4 | 1 |
| 2 | 1 | 4 | 2 | 4 | 3 | 4 | 1 | 2 |
| 5 | 1 | 5 | 3 | 3 | 5 | 2 | 5 | 1 |
| 5 | 1 | 5 | 5 | 5 | 5 | 2 | 5 | 5 |
| 5 | 4 | 4 | 4 | 1 | 4 | 2 | 4 | 1 |
| 1 | 1 | 4 | 4 | 5 | 5 | 1 | 4 | 2 |
| 2 | 1 | 4 | 4 | 4 | 3 | 2 | 2 | 2 |
| 2 | 2 | 5 | 2 | 4 | 4 | 4 | 4 | 2 |
| 5 | 5 | 5 | 4 | 5 | 5 | 2 | 5 | 2 |
| 1 | 1 | 5 | 5 | 5 | 5 | 5 | 5 | 1 |
| 1 | 1 | 1 | 1 | 1 | 1 | 1 | 1 | 1 |
| 3 | 2 | 5 | 4 | 4 | 4 | 2 | 3 | 1 |
| 2 | 2 | 3 | 3 | 3 | 3 | 3 | 3 | 3 |
| 4 | 4 | 4 | 4 | 5 | 5 | 4 | 4 | 1 |
| 3 | 3 | 3 | 3 | 3 | 3 | 3 | 3 | 3 |
| 3 | 3 | 2 | 1 | 1 | 1 | 3 | 3 | 4 |
| 3 | 2 | 3 | 4 | 3 | 3 | 3 | 2 | 2 |
| 3 | 1 | 5 | 4 | 4 | 4 | 4 | 4 | 3 |
| 2 | 2 | 4 | 4 | 4 | 4 | 4 | 4 | 2 |
| 3 | 2 | 4 | 4 | 4 | 4 | 4 | 4 | 2 |
| 2 | 1 | 5 | 5 | 5 | 5 | 2 | 2 | 1 |
| 5 | 1 | 5 | 5 | 3 | 5 | 1 | 1 | 1 |
| 3 | 1 | 3 | 3 | 3 | 3 | 3 | 4 | 3 |
| 3 | 3 | 4 | 3 | 3 | 3 | 3 | 3 | 3 |
| 3 | 2 | 4 | 2 | 3 | 3 | 3 | 3 | 3 |
| 1 | 1 | 5 | 5 | 5 | 5 | 3 | 3 | 1 |
| 5 | 5 | 5 | 5 | 5 | 5 | 5 | 5 | 5 |
| 1 | 1 | 5 | 4 | 4 | 5 | 4 | 1 | 1 |
| 3 | 3 | 3 | 3 | 3 | 3 | 3 | 3 | 3 |
| 5 | 3 | 4 | 1 | 1 | 1 | 5 | 3 | 5 |
| 4 | 4 | 4 | 2 | 2 | 3 | 4 | 3 | 4 |
| 5 | 5 | 5 | 5 | 5 | 5 | 5 | 5 | 1 |
| 2 | 1 | 5 | 3 | 5 | 4 | 3 | 2 | 1 |
| 2 | 1 | 4 | 3 | 4 | 4 | 4 | 1 | 2 |
| 2 | 1 | 5 | 4 | 3 | 4 | 3 | 3 | 2 |
| 1 | 1 | 5 | 3 | 5 | 5 | 2 | 3 | 1 |
| 4 | 4 | 4 | 4 | 4 | 4 | 4 | 4 | 4 |
| 4 | 1 | 1 | 5 | 1 | 5 | 1 | 4 | 1 |
| 2 | 2 | 2 | 4 | 4 | 4 | 2 | 4 | 4 |
| 3 | 1 | 4 | 3 | 3 | 4 | 4 | 3 | 4 |
| 2 | 3 | 5 | 3 | 3 | 5 | 5 | 4 | 2 |
| 1 | 1 | 5 | 5 | 5 | 5 | 3 | 5 | 5 |
| 3 | 3 | 3 | 3 | 3 | 4 | 1 | 3 | 1 |
| 3 | 2 | 4 | 3 | 3 | 4 | 3 | 3 | 2 |
| 3 | 1 | 4 | 3 | 2 | 4 | 4 | 4 | 2 |
| 2 | 2 | 3 | 3 | 4 | 4 | 2 | 4 | 2 |
| 1 | 1 | 5 | 3 | 5 | 5 | 2 | 1 | 1 |
| 2 | 4 | 1 | 4 | 1 | 2 | 4 | 4 | 1 |
| 2 | 2 | 4 | 3 | 4 | 4 | 2 | 3 | 4 |
| 1 | 1 | 5 | 1 | 5 | 5 | 1 | 5 | 1 |
| 3 | 3 | 3 | 3 | 3 | 3 | 3 | 3 | 3 |
| 2 | 2 | 4 | 3 | 4 | 4 | 2 | 4 | 2 |

|   |   |   |   |   |   |   |   |   |
|---|---|---|---|---|---|---|---|---|
| 1 | 1 | 1 | 5 | 5 | 5 | 2 | 2 | 1 |
| 1 | 1 | 5 | 1 | 1 | 1 | 1 | 1 | 2 |
| 2 | 2 | 4 | 4 | 4 | 4 | 4 | 3 | 2 |
| 3 | 3 | 3 | 3 | 3 | 3 | 3 | 3 | 3 |
| 3 | 3 | 3 | 3 | 3 | 3 | 3 | 3 | 3 |
| 1 | 1 | 5 | 3 | 1 | 5 | 1 | 1 | 1 |
| 1 | 1 | 5 | 5 | 5 | 5 | 1 | 1 | 1 |
| 4 | 4 | 3 | 3 | 4 | 4 | 4 | 4 | 2 |
| 3 | 1 | 4 | 2 | 1 | 3 | 1 | 1 | 1 |
| 5 | 3 | 3 | 1 | 1 | 3 | 5 | 1 | 5 |
| 2 | 2 | 4 | 3 | 4 | 4 | 3 | 4 | 2 |
| 1 | 1 | 5 | 2 | 4 | 4 | 5 | 4 | 2 |
| 4 | 2 | 4 | 2 | 4 | 4 | 4 | 4 | 4 |
| 1 | 2 | 3 | 3 | 3 | 4 | 2 | 3 | 4 |
| 1 | 1 | 3 | 2 | 5 | 5 | 2 | 1 | 1 |
| 2 | 2 | 5 | 5 | 5 | 5 | 2 | 5 | 2 |
| 3 | 3 | 3 | 3 | 3 | 3 | 3 | 3 | 3 |
| 2 | 2 | 5 | 3 | 2 | 5 | 5 | 4 | 2 |
| 1 | 1 | 5 | 5 | 5 | 5 | 1 | 5 | 1 |
| 3 | 2 | 2 | 2 | 2 | 3 | 3 | 3 | 3 |
| 2 | 2 | 4 | 4 | 4 | 4 | 4 | 4 | 4 |
| 2 | 2 | 4 | 3 | 4 | 3 | 4 | 4 | 2 |
| 1 | 1 | 5 | 1 | 4 | 4 | 5 | 3 | 1 |
| 3 | 4 | 3 | 4 | 2 | 4 | 4 | 4 | 2 |
| 2 | 2 | 5 | 3 | 5 | 5 | 2 | 1 | 3 |
| 5 | 1 | 5 | 1 | 1 | 5 | 5 | 1 | 5 |
| 2 | 1 | 4 | 4 | 5 | 4 | 4 | 4 | 1 |
| 2 | 2 | 3 | 3 | 4 | 4 | 3 | 4 | 4 |
| 5 | 5 | 5 | 2 | 5 | 3 | 3 | 5 | 1 |
| 1 | 1 | 5 | 4 | 5 | 5 | 2 | 5 | 1 |
| 1 | 1 | 1 | 5 | 5 | 5 | 1 | 3 | 1 |
| 3 | 2 | 4 | 3 | 4 | 4 | 4 | 4 | 3 |
| 2 | 1 | 1 | 1 | 1 | 1 | 1 | 2 | 1 |
| 5 | 5 | 5 | 4 | 5 | 5 | 5 | 5 | 5 |
| 3 | 3 | 3 | 3 | 3 | 3 | 3 | 3 | 3 |
| 4 | 1 | 4 | 3 | 3 | 4 | 4 | 4 | 3 |
| 1 | 1 | 5 | 5 | 5 | 5 | 5 | 5 | 1 |
| 1 | 1 | 4 | 3 | 4 | 4 | 3 | 3 | 2 |
| 4 | 2 | 5 | 1 | 4 | 5 | 2 | 1 | 4 |
| 5 | 3 | 3 | 3 | 4 | 4 | 4 | 4 | 3 |
| 2 | 2 | 4 | 4 | 4 | 4 | 4 | 2 | 2 |
| 4 | 3 | 3 | 3 | 3 | 3 | 4 | 3 | 3 |
| 2 | 2 | 4 | 3 | 3 | 3 | 3 | 2 | 2 |
| 2 | 2 | 4 | 3 | 4 | 4 | 4 | 4 | 2 |
| 2 | 2 | 3 | 3 | 4 | 3 | 3 | 3 | 2 |
| 3 | 2 | 4 | 2 | 3 | 2 | 4 | 2 | 4 |
| 2 | 2 | 4 | 4 | 4 | 4 | 2 | 4 | 2 |
| 1 | 1 | 4 | 2 | 4 | 4 | 2 | 4 | 2 |
| 1 | 1 | 4 | 4 | 4 | 3 | 2 | 2 | 1 |
| 2 | 1 | 5 | 2 | 5 | 3 | 4 | 4 | 2 |
| 2 | 2 | 4 | 2 | 2 | 3 | 3 | 2 | 3 |
| 1 | 1 | 5 | 4 | 4 | 3 | 1 | 2 | 1 |
| 3 | 2 | 5 | 2 | 5 | 5 | 5 | 3 | 4 |
| 4 | 3 | 4 | 2 | 3 | 2 | 4 | 4 | 4 |



|   |   |   |   |   |   |   |   |   |
|---|---|---|---|---|---|---|---|---|
| 2 | 2 | 4 | 4 | 4 | 4 | 3 | 3 | 1 |
| 2 | 1 | 5 | 5 | 5 | 5 | 5 | 5 | 2 |
| 4 | 4 | 2 | 4 | 4 | 4 | 2 | 3 | 4 |
| 4 | 3 | 3 | 3 | 3 | 3 | 3 | 3 | 3 |
| 4 | 2 | 4 | 2 | 4 | 3 | 4 | 4 | 4 |
| 1 | 2 | 5 | 5 | 5 | 5 | 2 | 4 | 2 |
| 1 | 1 | 4 | 4 | 3 | 4 | 3 | 4 | 1 |
| 4 | 1 | 3 | 1 | 4 | 4 | 2 | 1 | 1 |
| 2 | 2 | 4 | 4 | 4 | 4 | 2 | 2 | 2 |
| 3 | 3 | 4 | 3 | 2 | 4 | 5 | 5 | 4 |
| 2 | 1 | 4 | 4 | 4 | 4 | 3 | 3 | 3 |
| 2 | 2 | 2 | 3 | 4 | 4 | 4 | 1 | 2 |
| 2 | 2 | 3 | 3 | 4 | 4 | 2 | 4 | 2 |
| 4 | 2 | 5 | 3 | 4 | 3 | 5 | 2 | 4 |
| 1 | 1 | 5 | 4 | 3 | 3 | 3 | 3 | 1 |
| 2 | 2 | 4 | 2 | 4 | 3 | 3 | 3 | 3 |
| 4 | 1 | 4 | 2 | 2 | 4 | 3 | 2 | 3 |
| 3 | 3 | 3 | 3 | 3 | 2 | 3 | 3 | 3 |
| 1 | 1 | 5 | 5 | 5 | 5 | 5 | 1 | 1 |
| 1 | 1 | 5 | 5 | 5 | 5 | 5 | 4 | 3 |
| 2 | 2 | 5 | 5 | 5 | 4 | 4 | 5 | 4 |
| 1 | 1 | 5 | 4 | 4 | 4 | 1 | 1 | 1 |
| 2 | 2 | 5 | 2 | 4 | 5 | 3 | 4 | 2 |
| 1 | 1 | 5 | 4 | 5 | 5 | 5 | 3 | 1 |
| 5 | 5 | 5 | 1 | 1 | 1 | 1 | 1 | 1 |
| 3 | 2 | 4 | 2 | 4 | 3 | 3 | 3 | 3 |
| 1 | 1 | 5 | 5 | 5 | 5 | 3 | 5 | 1 |
| 1 | 1 | 3 | 2 | 2 | 5 | 5 | 4 | 1 |
| 3 | 3 | 3 | 3 | 3 | 3 | 3 | 4 | 3 |
| 3 | 3 | 3 | 3 | 3 | 3 | 3 | 3 | 3 |
| 1 | 1 | 5 | 3 | 5 | 4 | 3 | 3 | 1 |
| 3 | 3 | 3 | 3 | 3 | 3 | 3 | 3 | 3 |
| 1 | 1 | 5 | 5 | 5 | 4 | 2 | 4 | 1 |
| 5 | 4 | 2 | 1 | 3 | 1 | 5 | 1 | 5 |
| 3 | 3 | 4 | 2 | 4 | 4 | 4 | 4 | 4 |
| 4 | 2 | 2 | 2 | 4 | 3 | 4 | 2 | 3 |
| 2 | 2 | 2 | 3 | 1 | 2 | 2 | 3 | 2 |
| 2 | 1 | 4 | 4 | 3 | 3 | 3 | 2 | 3 |
| 2 | 2 | 4 | 4 | 4 | 5 | 3 | 3 | 2 |
| 5 | 2 | 4 | 2 | 3 | 2 | 4 | 4 | 4 |
| 3 | 1 | 5 | 3 | 2 | 5 | 1 | 5 | 3 |
| 3 | 3 | 3 | 3 | 3 | 3 | 3 | 3 | 3 |
| 5 | 2 | 4 | 2 | 3 | 3 | 5 | 2 | 4 |
| 2 | 4 | 4 | 5 | 1 | 4 | 4 | 1 | 1 |
| 4 | 4 | 4 | 4 | 4 | 4 | 4 | 4 | 4 |
| 2 | 1 | 5 | 2 | 4 | 4 | 2 | 4 | 2 |
| 2 | 2 | 4 | 4 | 3 | 4 | 2 | 4 | 2 |
| 4 | 3 | 3 | 2 | 4 | 4 | 4 | 2 | 2 |
| 1 | 1 | 5 | 4 | 4 | 4 | 2 | 2 | 1 |
| 2 | 1 | 5 | 4 | 4 | 4 | 2 | 4 | 2 |
| 3 | 2 | 1 | 1 | 4 | 3 | 5 | 2 | 5 |
| 4 | 3 | 3 | 3 | 3 | 3 | 3 | 3 | 3 |
| 3 | 2 | 4 | 2 | 2 | 4 | 4 | 4 | 2 |
| 2 | 2 | 4 | 3 | 4 | 4 | 2 | 3 | 2 |

|   |   |   |   |   |   |   |   |   |
|---|---|---|---|---|---|---|---|---|
| 2 | 2 | 4 | 2 | 4 | 3 | 4 | 3 | 4 |
| 3 | 2 | 4 | 3 | 3 | 4 | 3 | 3 | 3 |
| 4 | 3 | 3 | 3 | 3 | 3 | 3 | 3 | 2 |
| 2 | 2 | 4 | 4 | 4 | 4 | 4 | 3 | 1 |
| 4 | 3 | 5 | 1 | 2 | 3 | 5 | 5 | 5 |
| 1 | 1 | 5 | 2 | 5 | 4 | 1 | 4 | 1 |
| 2 | 1 | 5 | 4 | 4 | 4 | 3 | 2 | 2 |
| 3 | 2 | 2 | 3 | 2 | 3 | 3 | 3 | 2 |
| 1 | 1 | 5 | 5 | 5 | 5 | 1 | 1 | 1 |
| 1 | 1 | 5 | 3 | 5 | 5 | 3 | 2 | 1 |
| 4 | 2 | 4 | 4 | 4 | 4 | 3 | 4 | 4 |
| 3 | 4 | 5 | 3 | 4 | 5 | 4 | 4 | 4 |
| 1 | 1 | 5 | 5 | 4 | 5 | 1 | 1 | 1 |
| 2 | 2 | 2 | 4 | 2 | 3 | 3 | 3 | 2 |
| 2 | 2 | 4 | 4 | 3 | 4 | 3 | 2 | 2 |
| 1 | 1 | 5 | 5 | 5 | 5 | 1 | 1 | 1 |
| 4 | 2 | 4 | 4 | 4 | 4 | 4 | 4 | 3 |
| 3 | 3 | 3 | 3 | 3 | 4 | 4 | 4 | 3 |
| 3 | 2 | 5 | 3 | 4 | 4 | 2 | 2 | 4 |
| 3 | 1 | 4 | 3 | 4 | 4 | 3 | 1 | 3 |
| 3 | 2 | 5 | 3 | 4 | 4 | 3 | 3 | 3 |
| 2 | 2 | 4 | 4 | 4 | 4 | 2 | 2 | 2 |
| 3 | 3 | 3 | 2 | 3 | 3 | 4 | 3 | 2 |
| 3 | 2 | 4 | 3 | 4 | 4 | 4 | 4 | 3 |
| 3 | 2 | 4 | 2 | 4 | 3 | 3 | 2 | 3 |
| 3 | 1 | 3 | 3 | 1 | 1 | 5 | 1 | 5 |
| 1 | 1 | 4 | 4 | 5 | 5 | 1 | 1 | 1 |
| 4 | 3 | 4 | 3 | 3 | 3 | 4 | 3 | 3 |
| 5 | 5 | 5 | 5 | 5 | 5 | 5 | 5 | 5 |
| 4 | 4 | 4 | 2 | 2 | 2 | 4 | 2 | 4 |
| 1 | 2 | 3 | 3 | 3 | 3 | 3 | 3 | 3 |
| 1 | 1 | 5 | 5 | 5 | 5 | 1 | 2 | 1 |
| 3 | 3 | 4 | 3 | 4 | 3 | 4 | 2 | 3 |
| 2 | 1 | 4 | 3 | 4 | 4 | 3 | 2 | 2 |
| 1 | 1 | 5 | 5 | 5 | 5 | 1 | 1 | 1 |
| 3 | 3 | 4 | 4 | 3 | 4 | 4 | 3 | 3 |
| 1 | 1 | 4 | 2 | 4 | 5 | 2 | 3 | 1 |
| 2 | 2 | 4 | 4 | 4 | 4 | 4 | 4 | 4 |
| 5 | 4 | 3 | 2 | 3 | 4 | 5 | 5 | 4 |
| 4 | 2 | 4 | 4 | 4 | 4 | 3 | 4 | 2 |
| 2 | 2 | 4 | 3 | 4 | 4 | 4 | 4 | 2 |
| 2 | 1 | 5 | 2 | 5 | 5 | 4 | 5 | 2 |
| 4 | 2 | 4 | 2 | 3 | 2 | 4 | 4 | 4 |
| 3 | 2 | 4 | 4 | 4 | 4 | 2 | 2 | 2 |
| 1 | 1 | 5 | 4 | 5 | 5 | 2 | 2 | 1 |
| 1 | 1 | 4 | 4 | 4 | 4 | 3 | 2 | 1 |
| 3 | 1 | 1 | 2 | 3 | 3 | 3 | 3 | 3 |
| 2 | 2 | 4 | 4 | 4 | 4 | 4 | 4 | 2 |
| 5 | 4 | 3 | 2 | 2 | 2 | 5 | 2 | 3 |
| 3 | 3 | 4 | 3 | 3 | 3 | 3 | 3 | 3 |
| 2 | 2 | 4 | 4 | 5 | 4 | 4 | 4 | 2 |
| 3 | 3 | 2 | 3 | 3 | 3 | 3 | 3 | 3 |
| 2 | 2 | 4 | 3 | 4 | 4 | 3 | 4 | 3 |
| 3 | 2 | 4 | 3 | 4 | 4 | 4 | 2 | 3 |

|   |   |   |   |   |   |   |   |   |
|---|---|---|---|---|---|---|---|---|
| 4 | 4 | 4 | 4 | 4 | 4 | 4 | 4 | 4 |
| 3 | 4 | 3 | 3 | 3 | 2 | 3 | 4 | 1 |
| 4 | 3 | 2 | 3 | 3 | 4 | 3 | 2 | 2 |
| 5 | 2 | 2 | 2 | 2 | 3 | 3 | 3 | 3 |
| 2 | 2 | 3 | 3 | 3 | 4 | 3 | 3 | 3 |
| 2 | 2 | 4 | 4 | 4 | 4 | 2 | 2 | 2 |
| 5 | 2 | 4 | 2 | 2 | 2 | 4 | 4 | 3 |
| 5 | 4 | 4 | 2 | 2 | 2 | 5 | 2 | 4 |
| 4 | 3 | 3 | 1 | 3 | 1 | 2 | 2 | 3 |
| 3 | 3 | 3 | 3 | 3 | 3 | 3 | 3 | 3 |
| 2 | 1 | 5 | 3 | 1 | 4 | 3 | 5 | 2 |
| 2 | 2 | 5 | 4 | 3 | 4 | 4 | 3 | 1 |
| 3 | 3 | 3 | 4 | 2 | 2 | 5 | 5 | 3 |
| 2 | 2 | 5 | 3 | 2 | 4 | 2 | 3 | 2 |
| 2 | 2 | 4 | 4 | 4 | 4 | 4 | 4 | 2 |
| 1 | 1 | 4 | 4 | 4 | 4 | 2 | 1 | 2 |
| 4 | 3 | 3 | 2 | 2 | 2 | 3 | 3 | 3 |
| 2 | 1 | 4 | 3 | 4 | 4 | 4 | 3 | 2 |
| 1 | 1 | 4 | 4 | 5 | 3 | 1 | 1 | 1 |
| 3 | 1 | 5 | 3 | 4 | 4 | 4 | 3 | 2 |
| 4 | 2 | 4 | 3 | 2 | 3 | 4 | 3 | 4 |
| 4 | 4 | 4 | 4 | 4 | 4 | 4 | 4 | 4 |
| 3 | 3 | 4 | 3 | 3 | 3 | 2 | 2 | 3 |
| 3 | 3 | 3 | 3 | 3 | 3 | 3 | 3 | 3 |
| 1 | 1 | 5 | 5 | 5 | 5 | 2 | 3 | 1 |
| 4 | 1 | 5 | 1 | 5 | 5 | 3 | 1 | 1 |
| 3 | 2 | 5 | 3 | 3 | 4 | 2 | 3 | 2 |
| 2 | 2 | 4 | 4 | 2 | 3 | 3 | 4 | 2 |
| 2 | 1 | 4 | 4 | 4 | 5 | 3 | 3 | 2 |
| 1 | 1 | 2 | 3 | 3 | 4 | 4 | 2 | 2 |
| 2 | 2 | 5 | 2 | 2 | 2 | 2 | 5 | 2 |
| 2 | 2 | 2 | 4 | 4 | 4 | 3 | 3 | 3 |
| 2 | 2 | 2 | 2 | 3 | 4 | 4 | 4 | 3 |
| 4 | 4 | 4 | 4 | 4 | 4 | 4 | 4 | 2 |
| 2 | 2 | 4 | 4 | 4 | 4 | 3 | 2 | 2 |
| 3 | 3 | 3 | 3 | 3 | 3 | 3 | 3 | 3 |
| 5 | 5 | 5 | 5 | 5 | 5 | 5 | 5 | 5 |
| 1 | 1 | 4 | 5 | 5 | 5 | 2 | 5 | 1 |
| 4 | 4 | 4 | 4 | 4 | 4 | 4 | 4 | 3 |
| 1 | 1 | 5 | 5 | 5 | 5 | 1 | 1 | 1 |
| 4 | 4 | 4 | 4 | 4 | 4 | 4 | 4 | 4 |
| 4 | 3 | 4 | 4 | 2 | 2 | 3 | 3 | 4 |
| 1 | 1 | 1 | 1 | 4 | 4 | 2 | 2 | 2 |
| 2 | 2 | 4 | 3 | 4 | 4 | 4 | 4 | 3 |
| 4 | 4 | 4 | 4 | 4 | 4 | 4 | 4 | 4 |
| 4 | 3 | 3 | 2 | 4 | 4 | 4 | 4 | 4 |
| 2 | 2 | 4 | 4 | 4 | 4 | 2 | 4 | 2 |
| 2 | 2 | 4 | 4 | 3 | 4 | 4 | 4 | 2 |
| 1 | 2 | 4 | 4 | 4 | 4 | 2 | 4 | 2 |
| 2 | 2 | 4 | 4 | 4 | 4 | 2 | 4 | 2 |
| 2 | 2 | 2 | 2 | 4 | 4 | 2 | 2 | 2 |
| 3 | 3 | 3 | 3 | 3 | 3 | 3 | 3 | 3 |
| 1 | 1 | 5 | 4 | 4 | 4 | 2 | 2 | 2 |
| 1 | 1 | 5 | 3 | 5 | 5 | 1 | 4 | 1 |

|   |   |   |   |   |   |   |   |   |
|---|---|---|---|---|---|---|---|---|
| 1 | 1 | 1 | 1 | 5 | 5 | 3 | 5 | 1 |
| 1 | 1 | 5 | 5 | 5 | 5 | 5 | 5 | 1 |
| 1 | 1 | 4 | 4 | 4 | 4 | 2 | 2 | 2 |
| 3 | 3 | 3 | 3 | 3 | 3 | 3 | 4 | 2 |
| 1 | 1 | 5 | 4 | 5 | 5 | 2 | 2 | 1 |
| 1 | 1 | 5 | 5 | 5 | 5 | 1 | 3 | 1 |
| 2 | 2 | 5 | 3 | 4 | 4 | 4 | 3 | 2 |
| 3 | 2 | 5 | 4 | 4 | 5 | 3 | 3 | 1 |
| 3 | 1 | 5 | 3 | 5 | 3 | 2 | 3 | 3 |
| 1 | 1 | 5 | 5 | 5 | 5 | 4 | 4 | 1 |
| 1 | 1 | 4 | 3 | 4 | 4 | 2 | 1 | 2 |
| 5 | 2 | 2 | 4 | 4 | 4 | 5 | 3 | 4 |
| 2 | 2 | 4 | 4 | 4 | 4 | 3 | 3 | 2 |
| 2 | 2 | 4 | 4 | 4 | 4 | 3 | 2 | 2 |
| 2 | 2 | 2 | 2 | 2 | 4 | 4 | 4 | 4 |
| 3 | 2 | 3 | 2 | 3 | 2 | 4 | 3 | 2 |
| 3 | 2 | 4 | 2 | 2 | 4 | 4 | 4 | 2 |
| 1 | 1 | 4 | 4 | 3 | 4 | 2 | 4 | 1 |
| 2 | 2 | 4 | 4 | 3 | 4 | 2 | 2 | 2 |
| 1 | 1 | 3 | 3 | 3 | 5 | 3 | 3 | 1 |
| 1 | 1 | 5 | 1 | 5 | 5 | 1 | 1 | 1 |
| 3 | 4 | 3 | 3 | 3 | 3 | 3 | 1 | 4 |
| 3 | 3 | 3 | 3 | 3 | 3 | 3 | 3 | 3 |
| 2 | 2 | 4 | 3 | 3 | 4 | 3 | 3 | 2 |
| 5 | 5 | 5 | 4 | 5 | 5 | 1 | 5 | 1 |
| 4 | 3 | 3 | 3 | 3 | 3 | 3 | 3 | 3 |
| 2 | 2 | 4 | 3 | 3 | 3 | 4 | 3 | 3 |
| 1 | 1 | 5 | 3 | 5 | 5 | 2 | 2 | 1 |
| 1 | 1 | 4 | 4 | 4 | 4 | 4 | 4 | 2 |
| 5 | 5 | 3 | 1 | 3 | 3 | 3 | 3 | 5 |
| 2 | 2 | 4 | 3 | 4 | 4 | 2 | 3 | 2 |
| 3 | 2 | 5 | 3 | 4 | 4 | 3 | 4 | 2 |
| 1 | 1 | 5 | 5 | 5 | 5 | 5 | 5 | 2 |
| 2 | 2 | 1 | 4 | 4 | 4 | 2 | 2 | 2 |
| 2 | 2 | 5 | 3 | 4 | 4 | 4 | 5 | 1 |
| 1 | 1 | 5 | 1 | 5 | 5 | 1 | 3 | 1 |
| 1 | 1 | 5 | 3 | 4 | 3 | 2 | 1 | 2 |
| 2 | 2 | 4 | 3 | 3 | 3 | 3 | 4 | 3 |
| 2 | 1 | 3 | 1 | 5 | 5 | 2 | 4 | 1 |
| 2 | 2 | 4 | 4 | 4 | 4 | 2 | 2 | 2 |
| 5 | 5 | 5 | 5 | 5 | 5 | 5 | 5 | 5 |
| 3 | 3 | 3 | 3 | 4 | 3 | 3 | 3 | 3 |
| 2 | 1 | 5 | 3 | 4 | 4 | 3 | 2 | 1 |
| 2 | 2 | 4 | 4 | 2 | 4 | 4 | 4 | 2 |
| 1 | 1 | 5 | 5 | 4 | 4 | 2 | 2 | 1 |
| 3 | 1 | 4 | 4 | 4 | 4 | 4 | 4 | 2 |
| 1 | 1 | 5 | 1 | 1 | 1 | 5 | 1 | 5 |
| 3 | 3 | 3 | 3 | 3 | 3 | 3 | 3 | 3 |
| 1 | 2 | 5 | 3 | 3 | 4 | 4 | 3 | 2 |
| 2 | 2 | 5 | 5 | 5 | 5 | 3 | 5 | 2 |
| 4 | 4 | 4 | 3 | 3 | 3 | 3 | 3 | 3 |
| 2 | 2 | 4 | 3 | 3 | 3 | 2 | 2 | 2 |
| 2 | 2 | 4 | 4 | 4 | 4 | 2 | 4 | 2 |
| 1 | 1 | 5 | 5 | 3 | 5 | 2 | 2 | 1 |



|   |   |   |   |   |   |   |   |   |
|---|---|---|---|---|---|---|---|---|
| 1 | 1 | 5 | 5 | 5 | 5 | 5 | 5 | 5 |
| 1 | 1 | 5 | 4 | 5 | 5 | 2 | 2 | 1 |
| 1 | 1 | 3 | 5 | 3 | 3 | 1 | 3 | 1 |
| 2 | 2 | 4 | 4 | 4 | 4 | 1 | 1 | 1 |
| 3 | 2 | 3 | 3 | 3 | 4 | 5 | 3 | 3 |
| 1 | 1 | 5 | 1 | 5 | 5 | 2 | 4 | 3 |
| 2 | 2 | 4 | 3 | 2 | 4 | 5 | 3 | 2 |
| 1 | 1 | 5 | 5 | 5 | 5 | 5 | 5 | 1 |
| 2 | 2 | 5 | 5 | 4 | 5 | 3 | 5 | 5 |
| 1 | 1 | 5 | 4 | 5 | 4 | 2 | 2 | 1 |
| 2 | 2 | 4 | 2 | 4 | 4 | 2 | 4 | 2 |
| 2 | 3 | 3 | 3 | 4 | 5 | 4 | 4 | 5 |
| 1 | 1 | 5 | 5 | 5 | 5 | 1 | 1 | 1 |
| 3 | 3 | 3 | 3 | 3 | 3 | 3 | 3 | 3 |
| 2 | 2 | 4 | 2 | 3 | 4 | 4 | 2 | 2 |
| 1 | 1 | 4 | 3 | 4 | 4 | 4 | 4 | 1 |
| 2 | 1 | 4 | 3 | 4 | 4 | 2 | 1 | 2 |
| 2 | 4 | 4 | 3 | 5 | 3 | 3 | 2 | 2 |
| 2 | 1 | 4 | 2 | 2 | 2 | 3 | 1 | 3 |
| 2 | 2 | 4 | 3 | 3 | 4 | 2 | 2 | 1 |
| 3 | 2 | 5 | 4 | 5 | 3 | 3 | 2 | 2 |
| 2 | 2 | 4 | 4 | 4 | 4 | 2 | 2 | 2 |
| 1 | 1 | 5 | 5 | 5 | 5 | 1 | 1 | 1 |
| 1 | 1 | 3 | 5 | 5 | 1 | 1 | 3 | 1 |
| 3 | 3 | 4 | 2 | 3 | 3 | 4 | 3 | 4 |
| 1 | 1 | 5 | 5 | 5 | 5 | 1 | 1 | 1 |
| 1 | 1 | 5 | 5 | 2 | 4 | 2 | 1 | 1 |
| 4 | 2 | 5 | 2 | 2 | 3 | 4 | 3 | 4 |
| 1 | 1 | 5 | 2 | 4 | 4 | 1 | 3 | 1 |
| 2 | 1 | 3 | 2 | 4 | 3 | 2 | 3 | 2 |
| 3 | 3 | 3 | 3 | 3 | 3 | 3 | 3 | 3 |
| 1 | 1 | 4 | 5 | 4 | 4 | 1 | 2 | 1 |
| 2 | 2 | 4 | 2 | 4 | 4 | 2 | 2 | 2 |
| 1 | 1 | 5 | 5 | 5 | 5 | 1 | 3 | 1 |
| 5 | 5 | 4 | 1 | 3 | 4 | 4 | 2 | 4 |
| 4 | 2 | 4 | 3 | 3 | 2 | 4 | 2 | 4 |
| 4 | 3 | 5 | 3 | 3 | 3 | 3 | 3 | 4 |
| 1 | 1 | 5 | 1 | 5 | 5 | 1 | 1 | 1 |
| 2 | 2 | 4 | 2 | 4 | 2 | 4 | 2 | 2 |
| 1 | 1 | 5 | 5 | 4 | 3 | 1 | 2 | 2 |
| 2 | 2 | 4 | 4 | 3 | 4 | 2 | 2 | 2 |
| 1 | 1 | 5 | 5 | 5 | 5 | 1 | 1 | 1 |
| 5 | 1 | 5 | 3 | 5 | 5 | 4 | 3 | 3 |
| 1 | 1 | 5 | 5 | 5 | 5 | 1 | 4 | 1 |
| 3 | 3 | 3 | 3 | 3 | 3 | 3 | 3 | 3 |
| 2 | 2 | 4 | 4 | 3 | 4 | 4 | 2 | 2 |
| 1 | 1 | 4 | 3 | 5 | 5 | 1 | 3 | 1 |
| 2 | 1 | 5 | 2 | 3 | 5 | 5 | 2 | 1 |
| 3 | 3 | 3 | 3 | 2 | 3 | 4 | 3 | 4 |
| 1 | 1 | 5 | 1 | 5 | 5 | 1 | 1 | 1 |
| 3 | 3 | 3 | 3 | 3 | 3 | 3 | 3 | 3 |
| 1 | 1 | 5 | 5 | 5 | 4 | 3 | 3 | 1 |
| 1 | 1 | 5 | 5 | 5 | 5 | 1 | 5 | 1 |
| 3 | 1 | 5 | 2 | 5 | 4 | 4 | 3 | 2 |

|   |   |   |   |   |   |   |   |   |
|---|---|---|---|---|---|---|---|---|
| 3 | 3 | 3 | 3 | 3 | 3 | 3 | 3 | 3 |
| 2 | 1 | 4 | 4 | 4 | 4 | 3 | 4 | 2 |
| 1 | 1 | 4 | 3 | 4 | 5 | 1 | 1 | 1 |
| 3 | 3 | 3 | 3 | 3 | 3 | 3 | 3 | 3 |
| 1 | 1 | 5 | 1 | 5 | 5 | 5 | 4 | 4 |
| 1 | 1 | 5 | 4 | 4 | 4 | 2 | 5 | 2 |
| 3 | 4 | 3 | 3 | 4 | 4 | 3 | 3 | 3 |
| 2 | 2 | 3 | 1 | 2 | 2 | 2 | 2 | 2 |
| 2 | 2 | 5 | 4 | 4 | 4 | 2 | 4 | 2 |
| 1 | 1 | 5 | 5 | 5 | 5 | 3 | 5 | 1 |
| 1 | 1 | 5 | 5 | 5 | 5 | 1 | 1 | 1 |
| 2 | 2 | 4 | 4 | 4 | 4 | 4 | 3 | 3 |
| 1 | 1 | 5 | 5 | 5 | 5 | 1 | 2 | 1 |
| 4 | 4 | 4 | 2 | 2 | 4 | 4 | 4 | 4 |
| 2 | 1 | 3 | 3 | 4 | 4 | 3 | 2 | 1 |
| 2 | 4 | 4 | 4 | 5 | 5 | 5 | 5 | 5 |
| 1 | 1 | 5 | 3 | 4 | 3 | 2 | 2 | 2 |
| 1 | 1 | 5 | 4 | 5 | 5 | 1 | 2 | 1 |
| 2 | 2 | 4 | 3 | 4 | 4 | 4 | 3 | 2 |
| 3 | 2 | 3 | 3 | 3 | 3 | 3 | 3 | 4 |
| 1 | 1 | 3 | 3 | 4 | 4 | 4 | 4 | 2 |
| 3 | 3 | 4 | 3 | 3 | 3 | 3 | 3 | 3 |
| 1 | 1 | 5 | 5 | 5 | 5 | 5 | 5 | 5 |
| 1 | 1 | 5 | 1 | 5 | 5 | 1 | 5 | 1 |
| 3 | 2 | 3 | 4 | 3 | 2 | 4 | 4 | 3 |
| 4 | 4 | 2 | 2 | 4 | 3 | 2 | 3 | 2 |
| 1 | 2 | 1 | 3 | 3 | 2 | 2 | 2 | 2 |
| 3 | 2 | 4 | 2 | 3 | 3 | 2 | 2 | 3 |
| 1 | 1 | 5 | 3 | 4 | 4 | 4 | 4 | 1 |
| 4 | 2 | 5 | 3 | 2 | 3 | 2 | 3 | 3 |
| 4 | 2 | 4 | 4 | 2 | 4 | 4 | 2 | 2 |
| 3 | 3 | 3 | 3 | 3 | 3 | 3 | 3 | 3 |
| 2 | 2 | 4 | 4 | 4 | 4 | 2 | 4 | 2 |
| 4 | 3 | 3 | 2 | 3 | 3 | 3 | 3 | 4 |
| 3 | 3 | 3 | 3 | 3 | 3 | 3 | 3 | 3 |
| 4 | 2 | 4 | 2 | 4 | 5 | 4 | 4 | 4 |
| 5 | 2 | 4 | 3 | 2 | 3 | 4 | 3 | 4 |
| 4 | 2 | 2 | 3 | 4 | 4 | 2 | 4 | 2 |
| 3 | 2 | 4 | 4 | 4 | 4 | 3 | 3 | 3 |
| 3 | 3 | 3 | 3 | 3 | 3 | 3 | 3 | 3 |
| 5 | 2 | 5 | 3 | 3 | 5 | 5 | 2 | 5 |
| 2 | 1 | 2 | 4 | 4 | 4 | 2 | 2 | 2 |
| 1 | 1 | 5 | 1 | 5 | 5 | 4 | 3 | 1 |
| 5 | 3 | 3 | 2 | 3 | 3 | 4 | 4 | 4 |
| 4 | 3 | 4 | 3 | 3 | 3 | 4 | 3 | 4 |
| 1 | 1 | 5 | 5 | 5 | 5 | 1 | 5 | 1 |
| 4 | 3 | 3 | 2 | 3 | 3 | 4 | 4 | 4 |
| 2 | 2 | 4 | 3 | 4 | 4 | 2 | 4 | 2 |
| 3 | 2 | 4 | 4 | 4 | 4 | 3 | 4 | 2 |
| 3 | 1 | 4 | 2 | 4 | 4 | 2 | 1 | 1 |
| 2 | 1 | 5 | 3 | 4 | 4 | 3 | 3 | 1 |
| 2 | 2 | 4 | 4 | 4 | 4 | 2 | 2 | 2 |
| 3 | 3 | 3 | 3 | 3 | 3 | 3 | 3 | 3 |
| 3 | 3 | 3 | 3 | 3 | 4 | 4 | 4 | 3 |

|   |   |   |   |   |   |   |   |   |
|---|---|---|---|---|---|---|---|---|
| 2 | 2 | 5 | 3 | 2 | 4 | 4 | 2 | 2 |
| 3 | 3 | 4 | 3 | 3 | 4 | 4 | 2 | 3 |
| 3 | 1 | 4 | 3 | 4 | 3 | 4 | 1 | 2 |
| 1 | 1 | 4 | 4 | 4 | 4 | 4 | 4 | 1 |
| 4 | 4 | 4 | 2 | 2 | 2 | 4 | 3 | 4 |
| 3 | 3 | 3 | 3 | 4 | 3 | 5 | 1 | 1 |
| 3 | 2 | 4 | 4 | 3 | 4 | 5 | 5 | 3 |
| 3 | 3 | 3 | 3 | 3 | 3 | 3 | 3 | 3 |
| 1 | 1 | 5 | 3 | 5 | 5 | 4 | 4 | 1 |
| 2 | 2 | 5 | 5 | 5 | 5 | 2 | 2 | 2 |
| 2 | 2 | 4 | 4 | 4 | 4 | 2 | 2 | 2 |
| 1 | 1 | 1 | 1 | 1 | 1 | 1 | 1 | 1 |
| 2 | 2 | 3 | 4 | 4 | 3 | 2 | 2 | 2 |
| 4 | 2 | 4 | 3 | 3 | 4 | 4 | 3 | 4 |
| 2 | 1 | 4 | 2 | 3 | 5 | 2 | 2 | 2 |
| 5 | 3 | 4 | 4 | 4 | 3 | 3 | 3 | 3 |
| 2 | 1 | 5 | 4 | 4 | 4 | 4 | 4 | 2 |
| 5 | 3 | 5 | 1 | 1 | 2 | 4 | 3 | 3 |
| 2 | 2 | 4 | 4 | 4 | 3 | 4 | 2 | 2 |
| 4 | 4 | 4 | 2 | 2 | 3 | 4 | 1 | 4 |
| 5 | 2 | 5 | 3 | 5 | 5 | 5 | 5 | 5 |
| 3 | 3 | 3 | 3 | 3 | 3 | 2 | 3 | 3 |
| 3 | 2 | 4 | 3 | 4 | 4 | 4 | 4 | 3 |
| 3 | 2 | 3 | 3 | 4 | 4 | 3 | 4 | 3 |
| 2 | 2 | 4 | 4 | 4 | 4 | 4 | 4 | 4 |
| 3 | 3 | 5 | 3 | 3 | 4 | 4 | 4 | 4 |
| 3 | 3 | 3 | 2 | 3 | 3 | 3 | 3 | 3 |
| 5 | 5 | 5 | 1 | 1 | 1 | 5 | 1 | 5 |
| 4 | 2 | 4 | 2 | 4 | 2 | 4 | 2 | 4 |
| 2 | 1 | 5 | 4 | 4 | 4 | 2 | 4 | 2 |
| 4 | 1 | 4 | 4 | 4 | 3 | 4 | 4 | 2 |
| 3 | 2 | 4 | 3 | 4 | 4 | 4 | 4 | 3 |
| 3 | 2 | 3 | 3 | 3 | 3 | 3 | 3 | 3 |
| 1 | 1 | 5 | 1 | 5 | 5 | 1 | 5 | 1 |
| 3 | 3 | 4 | 4 | 4 | 4 | 4 | 4 | 4 |
| 4 | 2 | 4 | 3 | 3 | 4 | 3 | 2 | 2 |
| 3 | 3 | 4 | 3 | 4 | 4 | 4 | 4 | 3 |
| 4 | 4 | 4 | 4 | 4 | 4 | 4 | 4 | 4 |
| 3 | 2 | 4 | 2 | 2 | 4 | 4 | 4 | 2 |
| 4 | 3 | 4 | 2 | 3 | 2 | 3 | 4 | 4 |
| 1 | 1 | 5 | 5 | 4 | 5 | 3 | 2 | 1 |
| 2 | 2 | 4 | 3 | 4 | 4 | 3 | 3 | 2 |
| 4 | 4 | 4 | 4 | 4 | 4 | 4 | 4 | 4 |
| 3 | 2 | 4 | 3 | 4 | 3 | 2 | 2 | 3 |
| 2 | 1 | 3 | 3 | 3 | 4 | 2 | 4 | 2 |
| 2 | 1 | 4 | 2 | 4 | 4 | 3 | 3 | 4 |
| 3 | 2 | 5 | 4 | 2 | 4 | 3 | 2 | 2 |
| 3 | 3 | 3 | 3 | 3 | 3 | 3 | 3 | 3 |
| 2 | 1 | 2 | 2 | 3 | 5 | 3 | 5 | 1 |
| 1 | 1 | 4 | 3 | 4 | 4 | 3 | 3 | 2 |
| 2 | 2 | 4 | 4 | 4 | 4 | 2 | 4 | 2 |
| 1 | 1 | 5 | 3 | 5 | 5 | 4 | 2 | 5 |
| 1 | 1 | 4 | 4 | 4 | 4 | 2 | 2 | 1 |
| 1 | 1 | 5 | 2 | 5 | 5 | 2 | 1 | 1 |

|   |   |   |   |   |   |   |   |   |
|---|---|---|---|---|---|---|---|---|
| 3 | 2 | 4 | 2 | 4 | 3 | 3 | 3 | 2 |
| 3 | 4 | 4 | 3 | 4 | 3 | 3 | 4 | 3 |
| 3 | 2 | 4 | 3 | 4 | 4 | 3 | 3 | 2 |
| 3 | 3 | 4 | 3 | 4 | 4 | 3 | 3 | 3 |
| 3 | 3 | 3 | 3 | 3 | 3 | 3 | 3 | 3 |
| 2 | 2 | 3 | 3 | 3 | 3 | 3 | 3 | 4 |
| 1 | 1 | 5 | 2 | 3 | 1 | 3 | 4 | 2 |
| 2 | 2 | 5 | 2 | 4 | 5 | 2 | 2 | 2 |
| 1 | 1 | 3 | 1 | 3 | 4 | 4 | 1 | 1 |
| 1 | 1 | 3 | 4 | 4 | 5 | 2 | 1 | 1 |
| 1 | 1 | 5 | 5 | 3 | 5 | 2 | 1 | 1 |
| 1 | 1 | 4 | 4 | 3 | 5 | 1 | 2 | 1 |
| 2 | 2 | 4 | 3 | 4 | 3 | 3 | 1 | 1 |
| 2 | 2 | 4 | 4 | 4 | 4 | 3 | 3 | 3 |
| 1 | 1 | 5 | 5 | 5 | 5 | 1 | 3 | 1 |
| 2 | 2 | 2 | 4 | 4 | 4 | 4 | 2 | 2 |
| 1 | 1 | 5 | 1 | 5 | 5 | 1 | 1 | 1 |
| 4 | 2 | 4 | 2 | 3 | 4 | 2 | 4 | 2 |
| 3 | 3 | 4 | 3 | 3 | 3 | 3 | 3 | 3 |
| 4 | 2 | 4 | 1 | 2 | 3 | 3 | 3 | 5 |
| 2 | 1 | 5 | 3 | 5 | 5 | 2 | 1 | 1 |
| 3 | 2 | 4 | 3 | 3 | 3 | 3 | 2 | 3 |
| 5 | 5 | 5 | 5 | 5 | 5 | 5 | 1 | 1 |
| 1 | 1 | 4 | 5 | 5 | 5 | 1 | 1 | 1 |
| 1 | 1 | 5 | 4 | 5 | 5 | 2 | 1 | 1 |
| 4 | 3 | 5 | 2 | 2 | 2 | 4 | 5 | 4 |
| 1 | 1 | 4 | 2 | 5 | 5 | 2 | 4 | 1 |
| 1 | 1 | 5 | 1 | 5 | 5 | 1 | 1 | 1 |
| 3 | 3 | 4 | 3 | 3 | 4 | 3 | 3 | 2 |
| 1 | 1 | 5 | 5 | 5 | 5 | 1 | 1 | 1 |
| 2 | 1 | 1 | 3 | 4 | 3 | 1 | 1 | 1 |
| 1 | 1 | 4 | 4 | 5 | 5 | 2 | 1 | 1 |
| 4 | 1 | 4 | 3 | 3 | 3 | 3 | 3 | 3 |
| 1 | 1 | 5 | 5 | 4 | 5 | 1 | 1 | 1 |
| 1 | 1 | 5 | 3 | 4 | 3 | 4 | 4 | 1 |
| 2 | 1 | 5 | 4 | 4 | 4 | 2 | 2 | 2 |
| 2 | 2 | 4 | 3 | 1 | 3 | 5 | 2 | 2 |
| 5 | 4 | 3 | 1 | 2 | 1 | 4 | 1 | 5 |
| 3 | 3 | 3 | 3 | 3 | 3 | 3 | 3 | 3 |
| 2 | 1 | 4 | 3 | 4 | 4 | 2 | 1 | 2 |
| 1 | 1 | 5 | 5 | 5 | 5 | 1 | 1 | 1 |
| 3 | 3 | 4 | 2 | 3 | 3 | 3 | 4 | 2 |
| 3 | 3 | 3 | 3 | 3 | 3 | 3 | 3 | 3 |
| 1 | 1 | 4 | 2 | 4 | 4 | 2 | 2 | 1 |
| 3 | 3 | 3 | 2 | 3 | 3 | 2 | 2 | 3 |
| 3 | 2 | 3 | 2 | 5 | 4 | 4 | 2 | 3 |
| 1 | 1 | 3 | 4 | 4 | 3 | 2 | 1 | 1 |
| 3 | 3 | 4 | 3 | 3 | 3 | 3 | 3 | 3 |
| 2 | 1 | 4 | 4 | 4 | 4 | 2 | 2 | 2 |
| 3 | 2 | 4 | 3 | 3 | 3 | 2 | 2 | 2 |
| 5 | 2 | 1 | 2 | 4 | 4 | 1 | 4 | 1 |
| 1 | 1 | 5 | 5 | 5 | 5 | 1 | 2 | 1 |
| 2 | 1 | 3 | 2 | 4 | 4 | 3 | 1 | 1 |
| 1 | 1 | 1 | 4 | 4 | 5 | 1 | 2 | 1 |

|   |   |   |   |   |   |   |   |   |
|---|---|---|---|---|---|---|---|---|
| 2 | 1 | 3 | 4 | 5 | 4 | 3 | 1 | 1 |
| 2 | 2 | 4 | 4 | 3 | 5 | 1 | 2 | 2 |
| 3 | 2 | 4 | 3 | 4 | 4 | 4 | 3 | 1 |
| 5 | 5 | 1 | 5 | 1 | 1 | 5 | 1 | 5 |
| 3 | 2 | 3 | 3 | 2 | 3 | 3 | 2 | 3 |
| 3 | 4 | 3 | 2 | 3 | 2 | 4 | 2 | 4 |
| 2 | 2 | 3 | 3 | 3 | 4 | 3 | 2 | 3 |
| 3 | 2 | 4 | 4 | 4 | 4 | 4 | 2 | 2 |
| 2 | 2 | 4 | 2 | 3 | 3 | 3 | 2 | 2 |
| 4 | 1 | 3 | 3 | 2 | 2 | 4 | 3 | 2 |
| 2 | 1 | 5 | 5 | 4 | 4 | 2 | 4 | 1 |
| 2 | 2 | 4 | 2 | 3 | 2 | 2 | 2 | 3 |
| 3 | 2 | 4 | 3 | 4 | 4 | 3 | 3 | 2 |
| 4 | 1 | 5 | 5 | 5 | 5 | 1 | 4 | 1 |
| 1 | 1 | 5 | 5 | 4 | 5 | 2 | 4 | 1 |
| 3 | 3 | 3 | 3 | 3 | 3 | 3 | 3 | 3 |
| 2 | 2 | 4 | 2 | 4 | 4 | 3 | 4 | 2 |
| 2 | 1 | 4 | 4 | 4 | 4 | 2 | 3 | 1 |
| 2 | 2 | 3 | 3 | 4 | 4 | 2 | 4 | 2 |
| 2 | 2 | 2 | 3 | 4 | 4 | 3 | 2 | 2 |
| 4 | 3 | 4 | 3 | 3 | 4 | 2 | 3 | 2 |
| 4 | 3 | 4 | 2 | 2 | 2 | 4 | 3 | 4 |
| 5 | 5 | 5 | 5 | 5 | 5 | 5 | 5 | 5 |
| 5 | 2 | 4 | 2 | 4 | 4 | 4 | 4 | 3 |
| 3 | 2 | 5 | 2 | 3 | 4 | 4 | 3 | 3 |
| 3 | 2 | 4 | 2 | 3 | 3 | 3 | 3 | 3 |
| 3 | 3 | 3 | 3 | 3 | 3 | 3 | 3 | 3 |
| 1 | 1 | 5 | 4 | 4 | 4 | 1 | 4 | 1 |
| 3 | 3 | 3 | 3 | 3 | 3 | 3 | 3 | 3 |
| 2 | 2 | 4 | 3 | 4 | 4 | 3 | 4 | 3 |
| 3 | 3 | 3 | 3 | 3 | 3 | 3 | 3 | 3 |
| 4 | 3 | 4 | 2 | 3 | 3 | 4 | 3 | 4 |
| 3 | 3 | 4 | 2 | 4 | 4 | 4 | 3 | 3 |
| 2 | 2 | 4 | 3 | 4 | 3 | 3 | 4 | 2 |
| 3 | 3 | 4 | 3 | 3 | 3 | 4 | 4 | 3 |
| 2 | 2 | 4 | 4 | 4 | 4 | 2 | 4 | 2 |
| 2 | 2 | 5 | 4 | 5 | 5 | 3 | 4 | 1 |
| 2 | 2 | 4 | 4 | 4 | 4 | 2 | 3 | 2 |
| 2 | 2 | 3 | 3 | 3 | 3 | 4 | 4 | 4 |
| 3 | 3 | 3 | 3 | 3 | 3 | 3 | 3 | 3 |
| 1 | 1 | 4 | 4 | 4 | 4 | 2 | 2 | 2 |
| 1 | 1 | 5 | 5 | 5 | 4 | 3 | 4 | 1 |
| 2 | 2 | 4 | 2 | 3 | 4 | 3 | 3 | 2 |
| 2 | 2 | 4 | 4 | 4 | 4 | 2 | 2 | 2 |
| 4 | 4 | 3 | 2 | 2 | 2 | 3 | 3 | 4 |
| 5 | 2 | 4 | 5 | 4 | 4 | 4 | 2 | 5 |
| 1 | 1 | 4 | 4 | 4 | 4 | 1 | 3 | 1 |
| 1 | 1 | 5 | 4 | 4 | 4 | 2 | 2 | 2 |
| 1 | 1 | 4 | 4 | 4 | 4 | 3 | 4 | 2 |
| 1 | 1 | 4 | 3 | 4 | 4 | 1 | 1 | 1 |
| 1 | 1 | 5 | 3 | 4 | 5 | 2 | 3 | 1 |
| 1 | 1 | 3 | 4 | 4 | 4 | 4 | 3 | 2 |
| 1 | 1 | 5 | 5 | 5 | 5 | 4 | 1 | 1 |
| 2 | 2 | 5 | 3 | 4 | 4 | 4 | 3 | 2 |

|   |   |   |   |   |   |   |   |   |
|---|---|---|---|---|---|---|---|---|
| 2 | 3 | 4 | 4 | 3 | 4 | 3 | 2 | 2 |
| 2 | 2 | 4 | 4 | 4 | 4 | 2 | 4 | 2 |
| 2 | 1 | 4 | 3 | 3 | 4 | 4 | 3 | 2 |
| 1 | 1 | 5 | 5 | 5 | 5 | 2 | 2 | 1 |
| 1 | 1 | 4 | 4 | 4 | 4 | 2 | 2 | 1 |
| 2 | 2 | 5 | 3 | 4 | 4 | 4 | 3 | 2 |

| C42 | C43 | C44 | C45 | C46 | C47 | C48 | C49 | C50 |
|-----|-----|-----|-----|-----|-----|-----|-----|-----|
| 5   | 5   | 5   | 5   | 5   | 5   | 5   | 5   | 5   |
| 4   | 4   | 2   | 2   | 4   | 4   | 3   | 1   | 4   |
| 5   | 5   | 5   | 5   | 5   | 5   | 5   | 5   | 5   |
| 5   | 5   | 5   | 5   | 5   | 5   | 5   | 5   | 5   |
| 3   | 3   | 3   | 3   | 3   | 4   | 3   | 3   | 3   |
| 5   | 5   | 5   | 5   | 5   | 5   | 5   | 5   | 4   |
| 5   | 5   | 5   | 5   | 5   | 5   | 5   | 5   | 5   |
| 4   | 5   | 4   | 2   | 4   | 4   | 2   | 3   | 2   |
| 2   | 2   | 2   | 2   | 2   | 2   | 3   | 2   | 2   |
| 5   | 5   | 5   | 5   | 5   | 3   | 3   | 5   | 5   |
| 5   | 5   | 5   | 5   | 5   | 5   | 5   | 2   | 5   |
| 4   | 4   | 4   | 3   | 4   | 5   | 3   | 3   | 4   |
| 5   | 5   | 5   | 5   | 5   | 1   | 1   | 1   | 5   |
| 5   | 5   | 5   | 5   | 5   | 5   | 5   | 5   | 5   |
| 5   | 5   | 3   | 5   | 3   | 5   | 3   | 5   | 3   |
| 5   | 5   | 5   | 5   | 5   | 5   | 5   | 5   | 5   |
| 4   | 5   | 4   | 3   | 4   | 3   | 4   | 2   | 4   |
| 5   | 5   | 5   | 5   | 5   | 5   | 5   | 5   | 5   |
| 4   | 4   | 4   | 4   | 4   | 3   | 3   | 3   | 4   |
| 4   | 5   | 4   | 2   | 4   | 4   | 2   | 3   | 5   |
| 5   | 5   | 5   | 5   | 5   | 5   | 5   | 5   | 5   |
| 5   | 5   | 3   | 5   | 2   | 5   | 2   | 5   | 5   |
| 5   | 5   | 5   | 5   | 5   | 2   | 4   | 1   | 5   |
| 5   | 5   | 5   | 5   | 5   | 1   | 1   | 1   | 5   |
| 2   | 4   | 2   | 2   | 2   | 4   | 4   | 4   | 4   |
| 4   | 4   | 3   | 3   | 4   | 3   | 2   | 2   | 4   |
| 3   | 3   | 3   | 3   | 3   | 3   | 3   | 3   | 3   |
| 3   | 4   | 4   | 2   | 3   | 3   | 4   | 2   | 4   |
| 5   | 5   | 4   | 3   | 4   | 4   | 2   | 2   | 5   |
| 4   | 5   | 2   | 2   | 4   | 4   | 2   | 3   | 5   |
| 5   | 5   | 5   | 5   | 5   | 3   | 5   | 1   | 5   |
| 5   | 5   | 5   | 5   | 5   | 1   | 1   | 1   | 5   |
| 5   | 5   | 5   | 3   | 5   | 4   | 2   | 1   | 5   |
| 5   | 5   | 5   | 5   | 5   | 4   | 4   | 4   | 3   |
| 5   | 5   | 5   | 3   | 4   | 5   | 2   | 1   | 5   |
| 4   | 4   | 4   | 4   | 4   | 4   | 4   | 5   | 4   |
| 5   | 5   | 5   | 5   | 5   | 5   | 5   | 1   | 5   |
| 5   | 5   | 5   | 5   | 5   | 5   | 5   | 5   | 5   |
| 5   | 5   | 5   | 5   | 5   | 2   | 2   | 2   | 4   |
| 5   | 5   | 5   | 5   | 5   | 2   | 1   | 2   | 5   |
| 4   | 4   | 4   | 4   | 4   | 1   | 2   | 1   | 4   |
| 4   | 4   | 4   | 4   | 4   | 2   | 4   | 2   | 4   |
| 5   | 5   | 5   | 5   | 5   | 2   | 2   | 3   | 5   |
| 5   | 5   | 5   | 4   | 4   | 2   | 1   | 1   | 5   |
| 4   | 4   | 4   | 4   | 4   | 2   | 4   | 3   | 4   |
| 4   | 4   | 4   | 4   | 4   | 4   | 4   | 4   | 4   |
| 5   | 4   | 4   | 4   | 4   | 4   | 3   | 1   | 4   |
| 5   | 5   | 5   | 5   | 5   | 5   | 5   | 5   | 5   |
| 3   | 2   | 3   | 3   | 2   | 2   | 2   | 2   | 3   |
| 4   | 1   | 5   | 2   | 4   | 4   | 1   | 1   | 5   |
| 5   | 5   | 5   | 5   | 5   | 5   | 5   | 5   | 5   |
| 5   | 5   | 5   | 4   | 5   | 3   | 5   | 5   | 5   |
| 4   | 4   | 4   | 4   | 3   | 3   | 4   | 3   | 4   |

|   |   |   |   |   |   |   |   |   |
|---|---|---|---|---|---|---|---|---|
| 3 | 3 | 3 | 3 | 3 | 3 | 3 | 3 | 3 |
| 4 | 4 | 4 | 3 | 4 | 3 | 4 | 2 | 4 |
| 3 | 3 | 3 | 1 | 3 | 3 | 5 | 5 | 5 |
| 5 | 5 | 5 | 5 | 5 | 5 | 5 | 5 | 5 |
| 5 | 5 | 3 | 3 | 5 | 5 | 3 | 5 | 5 |
| 5 | 5 | 4 | 4 | 4 | 1 | 5 | 1 | 5 |
| 5 | 5 | 5 | 5 | 5 | 1 | 1 | 1 | 5 |
| 5 | 5 | 5 | 5 | 5 | 5 | 5 | 5 | 5 |
| 4 | 5 | 4 | 4 | 4 | 4 | 2 | 3 | 4 |
| 4 | 5 | 3 | 3 | 3 | 5 | 4 | 2 | 5 |
| 4 | 4 | 4 | 4 | 4 | 2 | 3 | 2 | 4 |
| 4 | 5 | 3 | 4 | 4 | 2 | 4 | 3 | 5 |
| 5 | 5 | 5 | 5 | 5 | 3 | 3 | 1 | 5 |
| 3 | 3 | 3 | 2 | 1 | 2 | 2 | 4 | 4 |
| 4 | 4 | 4 | 4 | 4 | 2 | 4 | 2 | 4 |
| 5 | 5 | 3 | 3 | 5 | 3 | 3 | 1 | 5 |
| 5 | 5 | 5 | 5 | 5 | 1 | 5 | 1 | 5 |
| 5 | 5 | 5 | 5 | 4 | 3 | 4 | 3 | 3 |
| 4 | 5 | 4 | 4 | 4 | 4 | 4 | 1 | 4 |
| 3 | 5 | 3 | 3 | 4 | 3 | 3 | 2 | 5 |
| 4 | 5 | 4 | 4 | 4 | 3 | 4 | 2 | 4 |
| 4 | 5 | 4 | 4 | 4 | 3 | 3 | 1 | 5 |
| 3 | 3 | 5 | 1 | 5 | 5 | 3 | 3 | 3 |
| 3 | 3 | 3 | 3 | 3 | 3 | 3 | 3 | 3 |
| 3 | 3 | 3 | 3 | 3 | 3 | 3 | 3 | 3 |
| 4 | 2 | 2 | 1 | 1 | 5 | 1 | 5 | 3 |
| 4 | 5 | 1 | 4 | 4 | 2 | 3 | 2 | 5 |
| 3 | 3 | 3 | 3 | 3 | 3 | 3 | 3 | 3 |
| 3 | 4 | 2 | 3 | 3 | 4 | 3 | 3 | 3 |
| 3 | 3 | 3 | 2 | 2 | 5 | 2 | 4 | 3 |
| 3 | 3 | 2 | 2 | 1 | 4 | 3 | 4 | 3 |
| 4 | 4 | 3 | 3 | 3 | 4 | 3 | 3 | 4 |
| 5 | 5 | 5 | 5 | 5 | 2 | 1 | 1 | 5 |
| 3 | 3 | 3 | 3 | 3 | 3 | 3 | 5 | 3 |
| 4 | 5 | 3 | 3 | 4 | 3 | 2 | 1 | 5 |
| 5 | 5 | 5 | 5 | 5 | 1 | 1 | 2 | 5 |
| 5 | 5 | 5 | 5 | 5 | 3 | 1 | 3 | 5 |
| 4 | 4 | 2 | 2 | 3 | 4 | 2 | 3 | 4 |
| 5 | 4 | 4 | 3 | 4 | 5 | 2 | 1 | 3 |
| 5 | 4 | 5 | 5 | 5 | 1 | 3 | 1 | 5 |
| 3 | 4 | 3 | 3 | 3 | 4 | 2 | 3 | 3 |
| 4 | 4 | 4 | 4 | 4 | 2 | 2 | 2 | 4 |
| 2 | 5 | 3 | 3 | 3 | 3 | 5 | 3 | 3 |
| 5 | 5 | 5 | 5 | 5 | 1 | 3 | 1 | 5 |
| 4 | 5 | 4 | 3 | 3 | 4 | 3 | 2 | 4 |
| 5 | 2 | 3 | 3 | 2 | 2 | 3 | 4 | 3 |
| 5 | 4 | 5 | 4 | 4 | 3 | 3 | 2 | 4 |
| 3 | 5 | 3 | 3 | 3 | 3 | 3 | 3 | 5 |
| 5 | 5 | 5 | 5 | 5 | 2 | 1 | 1 | 5 |
| 4 | 5 | 3 | 3 | 2 | 5 | 2 | 4 | 4 |
| 2 | 5 | 2 | 2 | 2 | 4 | 4 | 4 | 4 |
| 5 | 5 | 5 | 5 | 5 | 1 | 1 | 1 | 5 |
| 2 | 2 | 2 | 2 | 2 | 2 | 2 | 2 | 2 |
| 2 | 4 | 3 | 2 | 3 | 4 | 4 | 4 | 3 |



|   |   |   |   |   |   |   |   |   |
|---|---|---|---|---|---|---|---|---|
| 3 | 3 | 3 | 3 | 3 | 2 | 4 | 4 | 4 |
| 2 | 4 | 1 | 3 | 1 | 5 | 1 | 5 | 4 |
| 5 | 5 | 4 | 4 | 4 | 5 | 5 | 5 | 5 |
| 5 | 5 | 5 | 5 | 5 | 1 | 1 | 1 | 5 |
| 5 | 5 | 5 | 5 | 5 | 2 | 1 | 1 | 5 |
| 5 | 5 | 2 | 2 | 5 | 5 | 4 | 5 | 5 |
| 4 | 5 | 3 | 3 | 4 | 5 | 4 | 3 | 4 |
| 4 | 5 | 2 | 4 | 4 | 2 | 2 | 2 | 5 |
| 5 | 5 | 5 | 5 | 5 | 2 | 1 | 1 | 5 |
| 3 | 3 | 3 | 3 | 3 | 3 | 3 | 3 | 3 |
| 3 | 5 | 3 | 3 | 3 | 3 | 3 | 3 | 4 |
| 4 | 5 | 5 | 4 | 4 | 2 | 3 | 1 | 5 |
| 5 | 5 | 3 | 3 | 3 | 3 | 1 | 1 | 5 |
| 4 | 5 | 4 | 4 | 5 | 2 | 4 | 1 | 5 |
| 4 | 5 | 4 | 4 | 4 | 2 | 2 | 2 | 4 |
| 4 | 4 | 4 | 4 | 4 | 4 | 1 | 3 | 4 |
| 2 | 5 | 4 | 5 | 5 | 4 | 3 | 3 | 5 |
| 4 | 5 | 5 | 4 | 5 | 2 | 2 | 2 | 5 |
| 4 | 4 | 4 | 3 | 4 | 2 | 1 | 2 | 4 |
| 4 | 5 | 4 | 3 | 3 | 2 | 1 | 2 | 5 |
| 4 | 4 | 4 | 4 | 4 | 4 | 2 | 2 | 4 |
| 5 | 5 | 5 | 5 | 5 | 1 | 5 | 1 | 5 |
| 3 | 3 | 3 | 3 | 3 | 3 | 3 | 3 | 3 |
| 3 | 3 | 3 | 3 | 3 | 3 | 3 | 3 | 3 |
| 2 | 4 | 2 | 2 | 2 | 4 | 2 | 4 | 3 |
| 2 | 4 | 2 | 2 | 2 | 3 | 2 | 4 | 4 |
| 3 | 3 | 2 | 3 | 2 | 2 | 2 | 1 | 4 |
| 3 | 4 | 2 | 1 | 3 | 5 | 4 | 5 | 3 |
| 3 | 5 | 2 | 3 | 4 | 4 | 1 | 3 | 4 |
| 5 | 5 | 5 | 5 | 5 | 1 | 1 | 1 | 5 |
| 4 | 5 | 4 | 4 | 4 | 2 | 4 | 2 | 4 |
| 4 | 5 | 3 | 3 | 4 | 2 | 2 | 2 | 5 |
| 4 | 3 | 3 | 5 | 3 | 4 | 3 | 4 | 3 |
| 1 | 5 | 1 | 1 | 1 | 5 | 1 | 5 | 1 |
| 4 | 5 | 5 | 2 | 4 | 1 | 1 | 2 | 5 |
| 5 | 5 | 4 | 4 | 4 | 3 | 4 | 1 | 5 |
| 4 | 3 | 5 | 5 | 5 | 1 | 3 | 3 | 4 |
| 4 | 5 | 5 | 5 | 5 | 5 | 5 | 2 | 4 |
| 4 | 5 | 4 | 3 | 4 | 3 | 4 | 1 | 5 |
| 4 | 4 | 5 | 4 | 3 | 4 | 4 | 5 | 5 |
| 5 | 5 | 4 | 3 | 4 | 3 | 1 | 1 | 5 |
| 2 | 5 | 3 | 1 | 1 | 5 | 4 | 5 | 4 |
| 4 | 3 | 3 | 3 | 3 | 3 | 3 | 3 | 3 |
| 1 | 4 | 3 | 2 | 2 | 4 | 2 | 5 | 4 |
| 5 | 3 | 3 | 5 | 5 | 3 | 1 | 1 | 5 |
| 5 | 5 | 3 | 4 | 5 | 4 | 1 | 1 | 5 |
| 2 | 4 | 2 | 2 | 2 | 4 | 1 | 4 | 4 |
| 5 | 4 | 5 | 5 | 5 | 2 | 4 | 1 | 5 |
| 4 | 5 | 4 | 5 | 4 | 2 | 2 | 2 | 5 |
| 2 | 4 | 3 | 2 | 3 | 4 | 4 | 3 | 4 |
| 5 | 5 | 4 | 3 | 4 | 3 | 1 | 1 | 5 |
| 5 | 5 | 5 | 5 | 5 | 5 | 5 | 5 | 5 |
| 4 | 4 | 2 | 2 | 4 | 3 | 3 | 4 | 5 |
| 4 | 4 | 4 | 4 | 3 | 2 | 3 | 2 | 4 |

|   |   |   |   |   |   |   |   |   |
|---|---|---|---|---|---|---|---|---|
| 4 | 5 | 4 | 3 | 4 | 2 | 2 | 1 | 5 |
| 4 | 5 | 4 | 3 | 3 | 3 | 3 | 2 | 5 |
| 5 | 5 | 5 | 5 | 5 | 1 | 3 | 1 | 5 |
| 3 | 4 | 2 | 2 | 3 | 4 | 3 | 4 | 4 |
| 4 | 5 | 4 | 3 | 5 | 4 | 4 | 2 | 5 |
| 4 | 4 | 4 | 4 | 4 | 3 | 3 | 3 | 4 |
| 4 | 4 | 4 | 4 | 4 | 3 | 3 | 2 | 5 |
| 2 | 4 | 4 | 4 | 4 | 2 | 2 | 2 | 4 |
| 2 | 3 | 2 | 2 | 2 | 4 | 3 | 4 | 2 |
| 5 | 5 | 4 | 5 | 2 | 4 | 1 | 1 | 5 |
| 4 | 5 | 2 | 5 | 5 | 3 | 4 | 1 | 4 |
| 5 | 5 | 5 | 4 | 5 | 1 | 1 | 1 | 5 |
| 3 | 3 | 3 | 3 | 3 | 3 | 3 | 3 | 3 |
| 5 | 5 | 5 | 5 | 5 | 1 | 1 | 1 | 5 |
| 3 | 3 | 3 | 3 | 3 | 3 | 3 | 3 | 3 |
| 3 | 4 | 3 | 4 | 4 | 4 | 4 | 4 | 4 |
| 4 | 5 | 4 | 4 | 4 | 4 | 2 | 1 | 5 |
| 4 | 4 | 4 | 3 | 4 | 3 | 2 | 2 | 4 |
| 3 | 4 | 5 | 1 | 3 | 3 | 2 | 4 | 3 |
| 5 | 5 | 5 | 5 | 5 | 1 | 5 | 1 | 5 |
| 3 | 5 | 3 | 2 | 3 | 4 | 2 | 2 | 5 |
| 5 | 5 | 4 | 5 | 5 | 2 | 2 | 1 | 5 |
| 4 | 5 | 4 | 4 | 4 | 3 | 1 | 3 | 5 |
| 5 | 5 | 5 | 3 | 5 | 2 | 4 | 1 | 5 |
| 3 | 3 | 3 | 3 | 3 | 3 | 3 | 3 | 3 |
| 3 | 4 | 4 | 4 | 3 | 5 | 4 | 2 | 5 |
| 4 | 4 | 3 | 3 | 4 | 3 | 2 | 3 | 4 |
| 3 | 4 | 3 | 3 | 3 | 3 | 2 | 1 | 4 |
| 1 | 5 | 1 | 1 | 1 | 3 | 1 | 4 | 4 |
| 5 | 4 | 5 | 5 | 5 | 2 | 1 | 1 | 5 |
| 4 | 4 | 3 | 3 | 4 | 4 | 3 | 3 | 4 |
| 5 | 5 | 5 | 5 | 5 | 1 | 1 | 1 | 5 |
| 5 | 5 | 5 | 4 | 5 | 3 | 1 | 1 | 5 |
| 5 | 5 | 3 | 5 | 4 | 3 | 1 | 1 | 5 |
| 3 | 3 | 3 | 3 | 3 | 3 | 3 | 3 | 3 |
| 5 | 5 | 5 | 5 | 5 | 2 | 2 | 2 | 5 |
| 3 | 4 | 3 | 2 | 3 | 2 | 3 | 3 | 4 |
| 4 | 4 | 5 | 5 | 5 | 2 | 4 | 1 | 5 |
| 4 | 5 | 4 | 4 | 4 | 3 | 3 | 4 | 5 |
| 5 | 4 | 4 | 5 | 5 | 2 | 2 | 1 | 5 |
| 4 | 5 | 5 | 3 | 4 | 3 | 3 | 3 | 4 |
| 4 | 4 | 4 | 4 | 4 | 2 | 2 | 4 | 4 |
| 5 | 5 | 5 | 1 | 5 | 5 | 1 | 5 | 5 |
| 4 | 5 | 4 | 4 | 4 | 2 | 4 | 4 | 4 |
| 3 | 4 | 3 | 3 | 3 | 3 | 3 | 3 | 3 |
| 4 | 4 | 3 | 3 | 4 | 3 | 4 | 2 | 4 |
| 3 | 3 | 3 | 3 | 3 | 3 | 3 | 3 | 3 |
| 5 | 5 | 5 | 5 | 5 | 1 | 5 | 1 | 5 |
| 5 | 5 | 5 | 5 | 5 | 1 | 4 | 1 | 5 |
| 5 | 5 | 5 | 5 | 5 | 2 | 3 | 1 | 5 |
| 4 | 4 | 5 | 2 | 4 | 1 | 2 | 1 | 5 |
| 4 | 3 | 3 | 4 | 4 | 3 | 1 | 1 | 4 |
| 3 | 3 | 3 | 3 | 3 | 3 | 3 | 3 | 3 |
| 5 | 5 | 5 | 5 | 4 | 5 | 3 | 4 | 5 |



|   |   |   |   |   |   |   |   |   |
|---|---|---|---|---|---|---|---|---|
| 5 | 5 | 5 | 5 | 5 | 2 | 5 | 1 | 5 |
| 5 | 5 | 4 | 3 | 4 | 2 | 1 | 1 | 5 |
| 2 | 5 | 2 | 1 | 3 | 5 | 1 | 1 | 5 |
| 3 | 4 | 3 | 3 | 3 | 3 | 3 | 3 | 3 |
| 3 | 3 | 3 | 3 | 3 | 3 | 3 | 3 | 3 |
| 5 | 5 | 5 | 3 | 5 | 5 | 5 | 1 | 5 |
| 5 | 5 | 3 | 3 | 2 | 1 | 1 | 1 | 5 |
| 4 | 5 | 4 | 4 | 4 | 3 | 4 | 4 | 5 |
| 3 | 5 | 3 | 2 | 4 | 5 | 1 | 3 | 5 |
| 1 | 5 | 1 | 1 | 1 | 5 | 5 | 5 | 5 |
| 4 | 4 | 4 | 4 | 4 | 3 | 3 | 2 | 4 |
| 4 | 5 | 4 | 4 | 2 | 1 | 2 | 2 | 5 |
| 4 | 4 | 4 | 4 | 4 | 4 | 4 | 4 | 4 |
| 4 | 4 | 4 | 2 | 3 | 3 | 4 | 2 | 4 |
| 5 | 5 | 2 | 4 | 5 | 4 | 2 | 1 | 5 |
| 5 | 5 | 5 | 5 | 5 | 2 | 2 | 2 | 5 |
| 3 | 3 | 3 | 3 | 3 | 3 | 3 | 3 | 3 |
| 4 | 5 | 4 | 4 | 4 | 4 | 2 | 2 | 5 |
| 5 | 5 | 5 | 5 | 5 | 2 | 2 | 1 | 5 |
| 3 | 4 | 3 | 2 | 3 | 4 | 2 | 4 | 2 |
| 4 | 4 | 4 | 4 | 4 | 3 | 2 | 1 | 4 |
| 3 | 5 | 3 | 4 | 4 | 4 | 4 | 2 | 4 |
| 4 | 5 | 4 | 3 | 4 | 5 | 4 | 3 | 3 |
| 4 | 4 | 2 | 2 | 4 | 4 | 3 | 2 | 4 |
| 3 | 4 | 1 | 4 | 4 | 4 | 3 | 4 | 5 |
| 3 | 5 | 1 | 1 | 1 | 5 | 1 | 5 | 5 |
| 5 | 5 | 5 | 5 | 5 | 3 | 2 | 1 | 5 |
| 4 | 4 | 3 | 4 | 4 | 3 | 2 | 2 | 4 |
| 5 | 3 | 2 | 5 | 1 | 4 | 2 | 5 | 1 |
| 5 | 5 | 5 | 5 | 5 | 2 | 4 | 2 | 5 |
| 5 | 3 | 5 | 5 | 5 | 2 | 1 | 1 | 5 |
| 3 | 5 | 4 | 3 | 4 | 4 | 4 | 2 | 5 |
| 1 | 1 | 1 | 1 | 1 | 1 | 1 | 1 | 1 |
| 5 | 5 | 5 | 5 | 5 | 5 | 5 | 5 | 5 |
| 3 | 3 | 3 | 3 | 3 | 3 | 3 | 3 | 3 |
| 2 | 4 | 4 | 3 | 3 | 4 | 4 | 3 | 4 |
| 1 | 1 | 2 | 4 | 4 | 5 | 5 | 1 | 1 |
| 5 | 4 | 4 | 4 | 4 | 3 | 4 | 2 | 4 |
| 3 | 5 | 1 | 3 | 4 | 5 | 2 | 4 | 4 |
| 3 | 3 | 3 | 3 | 4 | 4 | 3 | 4 | 4 |
| 4 | 4 | 4 | 4 | 4 | 2 | 2 | 2 | 4 |
| 3 | 4 | 3 | 3 | 3 | 4 | 3 | 3 | 3 |
| 2 | 5 | 4 | 3 | 3 | 3 | 2 | 2 | 4 |
| 4 | 4 | 4 | 4 | 4 | 4 | 4 | 3 | 4 |
| 3 | 4 | 4 | 3 | 4 | 4 | 4 | 3 | 4 |
| 2 | 4 | 2 | 2 | 2 | 3 | 2 | 4 | 4 |
| 4 | 4 | 4 | 4 | 4 | 4 | 4 | 2 | 4 |
| 4 | 4 | 4 | 4 | 4 | 2 | 2 | 2 | 4 |
| 4 | 4 | 3 | 3 | 4 | 2 | 3 | 2 | 4 |
| 4 | 4 | 4 | 4 | 4 | 4 | 2 | 4 | 5 |
| 4 | 4 | 4 | 2 | 4 | 4 | 2 | 2 | 4 |
| 5 | 5 | 5 | 5 | 5 | 2 | 1 | 1 | 5 |
| 4 | 5 | 5 | 5 | 5 | 4 | 3 | 2 | 4 |
| 2 | 5 | 2 | 2 | 2 | 4 | 2 | 4 | 4 |



|   |   |   |   |   |   |   |   |   |
|---|---|---|---|---|---|---|---|---|
| 4 | 4 | 4 | 4 | 4 | 3 | 2 | 2 | 4 |
| 5 | 5 | 5 | 5 | 5 | 3 | 4 | 1 | 5 |
| 4 | 5 | 5 | 5 | 5 | 4 | 4 | 3 | 5 |
| 3 | 3 | 3 | 3 | 3 | 3 | 2 | 3 | 4 |
| 2 | 4 | 2 | 2 | 3 | 4 | 4 | 4 | 4 |
| 4 | 5 | 5 | 5 | 5 | 1 | 5 | 1 | 5 |
| 1 | 4 | 4 | 3 | 4 | 3 | 4 | 1 | 4 |
| 4 | 5 | 2 | 2 | 3 | 1 | 1 | 1 | 5 |
| 4 | 4 | 4 | 3 | 4 | 4 | 4 | 2 | 4 |
| 2 | 5 | 3 | 2 | 4 | 1 | 1 | 4 | 4 |
| 3 | 5 | 4 | 4 | 5 | 2 | 2 | 2 | 4 |
| 4 | 5 | 3 | 3 | 3 | 4 | 2 | 2 | 5 |
| 4 | 4 | 4 | 3 | 4 | 2 | 3 | 3 | 4 |
| 4 | 5 | 3 | 3 | 2 | 5 | 2 | 3 | 5 |
| 3 | 5 | 3 | 3 | 3 | 3 | 3 | 1 | 5 |
| 3 | 3 | 3 | 3 | 3 | 2 | 3 | 2 | 5 |
| 2 | 4 | 2 | 2 | 3 | 4 | 3 | 2 | 4 |
| 3 | 3 | 3 | 3 | 3 | 3 | 3 | 3 | 3 |
| 5 | 5 | 5 | 5 | 5 | 5 | 5 | 5 | 5 |
| 2 | 5 | 4 | 3 | 3 | 3 | 3 | 3 | 4 |
| 3 | 4 | 4 | 4 | 5 | 3 | 3 | 3 | 4 |
| 5 | 5 | 5 | 5 | 5 | 2 | 2 | 2 | 5 |
| 5 | 4 | 4 | 4 | 4 | 4 | 3 | 2 | 4 |
| 5 | 5 | 5 | 5 | 5 | 2 | 2 | 2 | 5 |
| 1 | 1 | 1 | 1 | 2 | 5 | 1 | 1 | 1 |
| 2 | 4 | 3 | 3 | 4 | 4 | 2 | 2 | 4 |
| 5 | 5 | 4 | 4 | 4 | 2 | 3 | 2 | 5 |
| 3 | 5 | 3 | 1 | 1 | 5 | 1 | 1 | 5 |
| 3 | 4 | 3 | 3 | 3 | 4 | 4 | 3 | 4 |
| 3 | 3 | 3 | 3 | 3 | 3 | 3 | 3 | 3 |
| 5 | 5 | 4 | 3 | 5 | 2 | 1 | 1 | 5 |
| 3 | 3 | 3 | 3 | 3 | 3 | 3 | 3 | 3 |
| 5 | 5 | 5 | 5 | 5 | 2 | 4 | 2 | 5 |
| 1 | 4 | 1 | 2 | 1 | 5 | 2 | 2 | 2 |
| 2 | 4 | 2 | 2 | 2 | 4 | 2 | 4 | 4 |
| 3 | 4 | 2 | 2 | 2 | 4 | 2 | 2 | 3 |
| 2 | 2 | 1 | 1 | 1 | 1 | 1 | 1 | 5 |
| 2 | 4 | 4 | 2 | 3 | 4 | 3 | 2 | 4 |
| 4 | 4 | 4 | 4 | 4 | 4 | 4 | 2 | 4 |
| 2 | 5 | 2 | 2 | 2 | 4 | 4 | 4 | 5 |
| 5 | 5 | 5 | 3 | 5 | 3 | 4 | 3 | 5 |
| 3 | 3 | 3 | 3 | 3 | 3 | 3 | 3 | 3 |
| 2 | 5 | 3 | 3 | 3 | 4 | 4 | 2 | 4 |
| 4 | 5 | 3 | 4 | 4 | 5 | 2 | 4 | 4 |
| 4 | 4 | 4 | 4 | 4 | 4 | 4 | 4 | 4 |
| 4 | 4 | 4 | 2 | 4 | 4 | 2 | 2 | 4 |
| 2 | 5 | 2 | 4 | 4 | 2 | 2 | 2 | 4 |
| 2 | 3 | 1 | 5 | 3 | 1 | 1 | 1 | 1 |
| 4 | 4 | 4 | 4 | 4 | 1 | 1 | 1 | 4 |
| 4 | 5 | 5 | 5 | 5 | 3 | 4 | 2 | 4 |
| 5 | 5 | 5 | 5 | 5 | 5 | 4 | 5 | 4 |
| 3 | 3 | 3 | 3 | 3 | 3 | 3 | 3 | 3 |
| 3 | 4 | 2 | 2 | 2 | 4 | 4 | 3 | 4 |
| 4 | 5 | 4 | 3 | 4 | 3 | 2 | 3 | 4 |

|   |   |   |   |   |   |   |   |   |
|---|---|---|---|---|---|---|---|---|
| 4 | 5 | 2 | 2 | 4 | 4 | 2 | 2 | 4 |
| 3 | 5 | 3 | 2 | 4 | 3 | 3 | 2 | 4 |
| 2 | 2 | 3 | 3 | 3 | 3 | 3 | 3 | 3 |
| 4 | 4 | 4 | 4 | 4 | 2 | 2 | 3 | 4 |
| 3 | 5 | 2 | 1 | 2 | 5 | 1 | 5 | 3 |
| 5 | 5 | 3 | 3 | 4 | 4 | 1 | 1 | 5 |
| 4 | 4 | 4 | 5 | 4 | 3 | 3 | 2 | 5 |
| 3 | 5 | 3 | 4 | 3 | 4 | 4 | 2 | 4 |
| 5 | 5 | 5 | 5 | 5 | 3 | 4 | 1 | 5 |
| 5 | 5 | 5 | 3 | 5 | 5 | 3 | 1 | 5 |
| 4 | 4 | 4 | 4 | 4 | 2 | 3 | 4 | 4 |
| 3 | 4 | 5 | 5 | 5 | 5 | 4 | 5 | 5 |
| 5 | 5 | 5 | 5 | 5 | 1 | 1 | 1 | 5 |
| 4 | 4 | 3 | 3 | 4 | 4 | 3 | 3 | 4 |
| 4 | 4 | 4 | 2 | 4 | 2 | 3 | 2 | 4 |
| 5 | 5 | 5 | 5 | 5 | 1 | 5 | 1 | 5 |
| 3 | 3 | 3 | 3 | 3 | 3 | 3 | 3 | 3 |
| 3 | 4 | 4 | 3 | 4 | 4 | 4 | 4 | 4 |
| 4 | 5 | 3 | 3 | 4 | 3 | 3 | 3 | 5 |
| 5 | 5 | 5 | 4 | 4 | 4 | 2 | 4 | 4 |
| 4 | 5 | 4 | 3 | 4 | 3 | 3 | 3 | 5 |
| 4 | 4 | 4 | 4 | 4 | 4 | 2 | 2 | 4 |
| 3 | 3 | 3 | 2 | 3 | 3 | 2 | 3 | 4 |
| 3 | 5 | 4 | 3 | 3 | 4 | 3 | 4 | 4 |
| 4 | 4 | 3 | 2 | 3 | 4 | 2 | 3 | 4 |
| 1 | 5 | 1 | 1 | 1 | 5 | 1 | 5 | 1 |
| 5 | 5 | 5 | 5 | 5 | 1 | 1 | 1 | 5 |
| 3 | 5 | 2 | 2 | 2 | 4 | 2 | 4 | 4 |
| 5 | 5 | 4 | 5 | 5 | 5 | 5 | 1 | 5 |
| 2 | 4 | 2 | 2 | 2 | 4 | 2 | 4 | 4 |
| 3 | 3 | 3 | 3 | 3 | 3 | 3 | 3 | 3 |
| 5 | 5 | 4 | 5 | 5 | 1 | 5 | 1 | 5 |
| 4 | 4 | 3 | 3 | 3 | 4 | 2 | 3 | 4 |
| 4 | 4 | 4 | 3 | 4 | 3 | 3 | 2 | 4 |
| 5 | 5 | 5 | 5 | 5 | 1 | 1 | 1 | 5 |
| 3 | 4 | 3 | 3 | 3 | 4 | 3 | 3 | 4 |
| 4 | 5 | 5 | 4 | 5 | 2 | 4 | 1 | 5 |
| 4 | 4 | 4 | 4 | 4 | 4 | 4 | 4 | 4 |
| 3 | 4 | 2 | 2 | 2 | 4 | 4 | 5 | 5 |
| 4 | 4 | 4 | 4 | 4 | 3 | 3 | 3 | 4 |
| 4 | 4 | 4 | 3 | 3 | 4 | 4 | 2 | 4 |
| 4 | 5 | 3 | 3 | 4 | 5 | 5 | 2 | 5 |
| 2 | 5 | 2 | 2 | 2 | 4 | 2 | 3 | 4 |
| 4 | 4 | 1 | 2 | 4 | 2 | 4 | 2 | 4 |
| 5 | 5 | 5 | 5 | 5 | 2 | 3 | 1 | 5 |
| 4 | 1 | 4 | 4 | 5 | 3 | 3 | 1 | 5 |
| 1 | 3 | 3 | 3 | 2 | 3 | 2 | 3 | 3 |
| 4 | 4 | 4 | 4 | 4 | 2 | 2 | 2 | 4 |
| 2 | 4 | 2 | 2 | 2 | 4 | 2 | 5 | 3 |
| 3 | 3 | 3 | 3 | 4 | 3 | 3 | 2 | 4 |
| 4 | 4 | 4 | 4 | 4 | 2 | 2 | 2 | 4 |
| 3 | 3 | 3 | 3 | 3 | 3 | 3 | 3 | 3 |
| 3 | 4 | 3 | 3 | 4 | 3 | 4 | 3 | 4 |
| 4 | 4 | 3 | 2 | 4 | 4 | 2 | 4 | 4 |

|   |   |   |   |   |   |   |   |   |
|---|---|---|---|---|---|---|---|---|
| 4 | 4 | 4 | 4 | 4 | 4 | 4 | 5 | 4 |
| 1 | 4 | 4 | 4 | 3 | 3 | 4 | 3 | 4 |
| 4 | 3 | 4 | 4 | 4 | 4 | 3 | 3 | 3 |
| 4 | 3 | 3 | 4 | 2 | 4 | 2 | 4 | 2 |
| 3 | 3 | 3 | 4 | 4 | 4 | 3 | 2 | 4 |
| 4 | 4 | 4 | 4 | 4 | 2 | 2 | 2 | 4 |
| 1 | 3 | 1 | 1 | 3 | 1 | 1 | 3 | 3 |
| 2 | 4 | 2 | 2 | 2 | 4 | 2 | 4 | 4 |
| 2 | 4 | 1 | 2 | 2 | 2 | 3 | 1 | 5 |
| 3 | 3 | 3 | 3 | 3 | 3 | 3 | 3 | 3 |
| 4 | 5 | 5 | 3 | 4 | 4 | 3 | 3 | 5 |
| 4 | 5 | 3 | 3 | 4 | 4 | 4 | 3 | 5 |
| 1 | 1 | 2 | 1 | 4 | 1 | 4 | 5 | 1 |
| 4 | 5 | 3 | 3 | 4 | 4 | 2 | 3 | 5 |
| 2 | 5 | 4 | 2 | 4 | 4 | 4 | 2 | 4 |
| 4 | 5 | 3 | 4 | 4 | 3 | 2 | 2 | 5 |
| 2 | 4 | 2 | 2 | 3 | 3 | 2 | 4 | 4 |
| 3 | 3 | 3 | 4 | 3 | 4 | 3 | 2 | 4 |
| 5 | 5 | 5 | 4 | 4 | 3 | 1 | 1 | 5 |
| 3 | 5 | 4 | 3 | 3 | 4 | 2 | 2 | 5 |
| 2 | 3 | 2 | 2 | 2 | 4 | 2 | 4 | 3 |
| 4 | 4 | 4 | 4 | 4 | 4 | 4 | 4 | 4 |
| 3 | 3 | 2 | 3 | 4 | 4 | 4 | 4 | 3 |
| 3 | 3 | 3 | 3 | 3 | 3 | 3 | 3 | 3 |
| 5 | 5 | 5 | 5 | 5 | 2 | 4 | 1 | 5 |
| 3 | 5 | 1 | 1 | 1 | 5 | 3 | 5 | 5 |
| 3 | 5 | 3 | 3 | 3 | 2 | 3 | 3 | 4 |
| 4 | 4 | 4 | 4 | 4 | 3 | 2 | 2 | 4 |
| 4 | 5 | 4 | 3 | 5 | 3 | 4 | 1 | 5 |
| 3 | 4 | 3 | 3 | 3 | 4 | 1 | 1 | 4 |
| 2 | 5 | 3 | 2 | 2 | 2 | 1 | 1 | 1 |
| 3 | 5 | 5 | 4 | 4 | 3 | 4 | 2 | 4 |
| 4 | 4 | 4 | 4 | 4 | 4 | 3 | 2 | 4 |
| 4 | 4 | 4 | 4 | 4 | 4 | 4 | 2 | 4 |
| 4 | 4 | 4 | 4 | 4 | 3 | 3 | 2 | 4 |
| 3 | 3 | 3 | 3 | 3 | 3 | 3 | 3 | 3 |
| 5 | 5 | 5 | 5 | 5 | 5 | 5 | 5 | 5 |
| 5 | 5 | 5 | 5 | 5 | 5 | 1 | 1 | 5 |
| 4 | 3 | 4 | 4 | 4 | 3 | 4 | 4 | 4 |
| 5 | 5 | 5 | 5 | 5 | 2 | 1 | 1 | 5 |
| 4 | 4 | 4 | 4 | 4 | 4 | 3 | 3 | 4 |
| 5 | 5 | 4 | 3 | 3 | 3 | 3 | 2 | 3 |
| 4 | 5 | 5 | 5 | 5 | 2 | 2 | 2 | 5 |
| 4 | 4 | 4 | 4 | 4 | 4 | 2 | 2 | 4 |
| 4 | 4 | 4 | 4 | 4 | 4 | 4 | 4 | 4 |
| 3 | 4 | 2 | 2 | 2 | 4 | 2 | 4 | 2 |
| 4 | 4 | 4 | 4 | 5 | 2 | 2 | 2 | 4 |
| 4 | 5 | 4 | 4 | 4 | 4 | 4 | 2 | 4 |
| 5 | 5 | 5 | 4 | 4 | 2 | 4 | 1 | 4 |
| 4 | 4 | 4 | 4 | 4 | 2 | 4 | 2 | 5 |
| 4 | 4 | 3 | 4 | 4 | 2 | 3 | 2 | 4 |
| 3 | 4 | 3 | 3 | 3 | 4 | 3 | 3 | 4 |
| 5 | 5 | 4 | 4 | 4 | 3 | 2 | 1 | 5 |
| 4 | 4 | 4 | 4 | 4 | 2 | 2 | 1 | 5 |





|   |   |   |   |   |   |   |   |   |
|---|---|---|---|---|---|---|---|---|
| 5 | 5 | 5 | 5 | 5 | 5 | 5 | 1 | 5 |
| 5 | 5 | 5 | 5 | 5 | 3 | 2 | 2 | 5 |
| 5 | 5 | 5 | 5 | 5 | 3 | 3 | 2 | 5 |
| 4 | 4 | 4 | 4 | 4 | 2 | 3 | 2 | 4 |
| 3 | 5 | 3 | 3 | 3 | 5 | 3 | 3 | 5 |
| 5 | 5 | 5 | 5 | 5 | 4 | 5 | 2 | 5 |
| 4 | 5 | 4 | 4 | 4 | 4 | 3 | 3 | 5 |
| 1 | 5 | 5 | 5 | 5 | 2 | 5 | 2 | 5 |
| 5 | 5 | 5 | 5 | 5 | 5 | 5 | 5 | 5 |
| 4 | 5 | 4 | 5 | 4 | 2 | 2 | 2 | 5 |
| 4 | 4 | 4 | 4 | 4 | 2 | 2 | 2 | 4 |
| 3 | 3 | 2 | 2 | 2 | 4 | 4 | 4 | 5 |
| 5 | 5 | 5 | 5 | 5 | 4 | 1 | 1 | 5 |
| 3 | 3 | 3 | 3 | 3 | 3 | 3 | 3 | 3 |
| 4 | 5 | 3 | 3 | 4 | 5 | 4 | 2 | 4 |
| 5 | 4 | 4 | 4 | 4 | 2 | 2 | 2 | 3 |
| 5 | 5 | 4 | 3 | 3 | 2 | 2 | 2 | 5 |
| 3 | 4 | 3 | 4 | 4 | 4 | 3 | 3 | 3 |
| 3 | 2 | 2 | 3 | 2 | 2 | 3 | 2 | 2 |
| 4 | 4 | 3 | 2 | 3 | 1 | 2 | 2 | 4 |
| 3 | 4 | 3 | 3 | 4 | 2 | 2 | 2 | 4 |
| 4 | 2 | 4 | 4 | 4 | 2 | 2 | 2 | 4 |
| 5 | 5 | 3 | 5 | 5 | 1 | 1 | 1 | 5 |
| 5 | 5 | 5 | 5 | 3 | 1 | 5 | 1 | 5 |
| 3 | 3 | 2 | 1 | 3 | 3 | 3 | 3 | 3 |
| 4 | 5 | 5 | 5 | 5 | 2 | 5 | 2 | 5 |
| 5 | 5 | 4 | 5 | 5 | 1 | 1 | 1 | 5 |
| 2 | 5 | 3 | 2 | 3 | 4 | 5 | 5 | 5 |
| 4 | 5 | 4 | 3 | 5 | 3 | 4 | 1 | 4 |
| 2 | 4 | 4 | 3 | 4 | 2 | 2 | 2 | 4 |
| 3 | 3 | 3 | 3 | 3 | 3 | 3 | 3 | 3 |
| 5 | 5 | 5 | 5 | 5 | 1 | 1 | 1 | 5 |
| 4 | 4 | 4 | 4 | 4 | 4 | 2 | 2 | 4 |
| 5 | 5 | 5 | 5 | 5 | 3 | 3 | 1 | 5 |
| 2 | 5 | 2 | 2 | 3 | 4 | 4 | 5 | 5 |
| 3 | 4 | 2 | 1 | 3 | 4 | 4 | 4 | 4 |
| 2 | 4 | 3 | 1 | 3 | 5 | 2 | 2 | 2 |
| 5 | 5 | 5 | 5 | 5 | 1 | 5 | 5 | 5 |
| 4 | 2 | 2 | 4 | 2 | 4 | 2 | 2 | 4 |
| 4 | 4 | 5 | 5 | 5 | 1 | 1 | 1 | 5 |
| 4 | 4 | 4 | 4 | 4 | 2 | 2 | 2 | 4 |
| 5 | 5 | 5 | 5 | 5 | 1 | 1 | 1 | 5 |
| 5 | 5 | 5 | 5 | 5 | 5 | 5 | 5 | 5 |
| 5 | 5 | 5 | 5 | 5 | 1 | 4 | 3 | 5 |
| 3 | 3 | 3 | 3 | 3 | 3 | 3 | 3 | 3 |
| 4 | 4 | 4 | 4 | 3 | 2 | 3 | 2 | 4 |
| 5 | 4 | 4 | 4 | 4 | 3 | 1 | 2 | 5 |
| 5 | 5 | 3 | 2 | 3 | 5 | 4 | 3 | 5 |
| 2 | 4 | 3 | 2 | 2 | 4 | 3 | 4 | 4 |
| 5 | 5 | 5 | 5 | 5 | 1 | 4 | 1 | 5 |
| 3 | 3 | 3 | 3 | 3 | 3 | 3 | 3 | 3 |
| 5 | 5 | 4 | 3 | 5 | 2 | 3 | 1 | 5 |
| 5 | 5 | 5 | 5 | 5 | 1 | 1 | 1 | 5 |
| 4 | 5 | 4 | 4 | 4 | 4 | 2 | 3 | 5 |

|   |   |   |   |   |   |   |   |   |
|---|---|---|---|---|---|---|---|---|
| 3 | 3 | 3 | 3 | 3 | 3 | 3 | 3 | 3 |
| 5 | 5 | 3 | 3 | 5 | 3 | 3 | 2 | 4 |
| 5 | 4 | 4 | 5 | 5 | 1 | 2 | 1 | 4 |
| 3 | 3 | 3 | 3 | 3 | 3 | 3 | 3 | 3 |
| 5 | 5 | 2 | 3 | 3 | 3 | 2 | 1 | 5 |
| 5 | 5 | 4 | 4 | 4 | 1 | 1 | 1 | 5 |
| 3 | 3 | 3 | 3 | 1 | 3 | 3 | 3 | 3 |
| 4 | 4 | 2 | 2 | 2 | 4 | 2 | 3 | 4 |
| 4 | 4 | 4 | 4 | 4 | 2 | 4 | 2 | 4 |
| 5 | 5 | 5 | 5 | 5 | 5 | 5 | 1 | 5 |
| 5 | 5 | 5 | 5 | 5 | 1 | 4 | 1 | 5 |
| 4 | 4 | 3 | 3 | 3 | 3 | 4 | 3 | 4 |
| 5 | 5 | 5 | 5 | 5 | 1 | 4 | 1 | 5 |
| 4 | 5 | 5 | 5 | 4 | 4 | 4 | 4 | 4 |
| 4 | 5 | 4 | 3 | 4 | 3 | 3 | 2 | 5 |
| 5 | 5 | 5 | 5 | 5 | 3 | 5 | 1 | 5 |
| 4 | 5 | 4 | 3 | 4 | 3 | 3 | 2 | 5 |
| 5 | 5 | 5 | 3 | 5 | 2 | 2 | 1 | 5 |
| 4 | 4 | 4 | 4 | 4 | 3 | 5 | 2 | 4 |
| 3 | 3 | 3 | 3 | 3 | 3 | 3 | 3 | 3 |
| 4 | 5 | 5 | 5 | 5 | 4 | 3 | 3 | 4 |
| 3 | 3 | 3 | 3 | 3 | 3 | 3 | 3 | 3 |
| 5 | 5 | 5 | 5 | 5 | 4 | 4 | 3 | 3 |
| 5 | 5 | 5 | 5 | 5 | 1 | 5 | 1 | 5 |
| 3 | 2 | 5 | 4 | 4 | 3 | 3 | 3 | 3 |
| 2 | 4 | 3 | 3 | 3 | 4 | 4 | 3 | 4 |
| 3 | 1 | 1 | 1 | 5 | 2 | 1 | 2 | 1 |
| 3 | 5 | 3 | 2 | 3 | 4 | 3 | 3 | 4 |
| 4 | 5 | 4 | 4 | 3 | 2 | 3 | 1 | 4 |
| 3 | 4 | 3 | 3 | 4 | 4 | 5 | 2 | 4 |
| 2 | 4 | 4 | 4 | 4 | 2 | 2 | 2 | 4 |
| 3 | 3 | 3 | 3 | 3 | 3 | 3 | 3 | 3 |
| 4 | 4 | 4 | 4 | 5 | 5 | 4 | 2 | 4 |
| 3 | 3 | 3 | 3 | 3 | 3 | 3 | 4 | 3 |
| 3 | 3 | 3 | 3 | 3 | 3 | 3 | 3 | 3 |
| 4 | 4 | 4 | 4 | 4 | 4 | 4 | 2 | 4 |
| 2 | 4 | 2 | 2 | 2 | 3 | 3 | 3 | 4 |
| 4 | 4 | 3 | 3 | 4 | 3 | 3 | 2 | 5 |
| 3 | 3 | 3 | 3 | 3 | 3 | 3 | 3 | 3 |
| 3 | 3 | 3 | 3 | 3 | 3 | 3 | 3 | 3 |
| 2 | 5 | 1 | 2 | 2 | 5 | 2 | 5 | 3 |
| 4 | 5 | 4 | 4 | 4 | 3 | 2 | 2 | 4 |
| 4 | 5 | 5 | 5 | 5 | 3 | 4 | 2 | 5 |
| 3 | 4 | 2 | 2 | 3 | 4 | 3 | 4 | 3 |
| 3 | 4 | 2 | 2 | 3 | 4 | 3 | 3 | 4 |
| 5 | 5 | 5 | 5 | 5 | 1 | 1 | 1 | 5 |
| 2 | 4 | 2 | 2 | 3 | 4 | 4 | 4 | 3 |
| 4 | 4 | 4 | 4 | 4 | 2 | 4 | 2 | 4 |
| 4 | 4 | 4 | 4 | 4 | 3 | 4 | 4 | 4 |
| 4 | 5 | 3 | 3 | 4 | 4 | 2 | 3 | 5 |
| 4 | 5 | 4 | 3 | 4 | 4 | 3 | 2 | 5 |
| 4 | 4 | 4 | 4 | 4 | 2 | 2 | 2 | 4 |
| 3 | 3 | 3 | 3 | 3 | 3 | 3 | 3 | 3 |
| 3 | 5 | 3 | 3 | 4 | 3 | 4 | 3 | 4 |

|   |   |   |   |   |   |   |   |   |
|---|---|---|---|---|---|---|---|---|
| 4 | 5 | 4 | 3 | 4 | 4 | 2 | 2 | 4 |
| 2 | 4 | 4 | 3 | 4 | 4 | 2 | 3 | 4 |
| 2 | 5 | 3 | 2 | 2 | 4 | 3 | 4 | 4 |
| 4 | 4 | 4 | 4 | 4 | 4 | 4 | 2 | 4 |
| 4 | 4 | 2 | 2 | 2 | 4 | 2 | 2 | 4 |
| 1 | 3 | 1 | 1 | 3 | 3 | 3 | 1 | 5 |
| 2 | 4 | 3 | 3 | 4 | 5 | 5 | 4 | 4 |
| 3 | 3 | 3 | 3 | 3 | 3 | 3 | 3 | 3 |
| 5 | 5 | 5 | 4 | 5 | 1 | 4 | 1 | 5 |
| 5 | 5 | 5 | 2 | 5 | 5 | 5 | 2 | 5 |
| 4 | 4 | 4 | 4 | 4 | 2 | 2 | 2 | 4 |
| 1 | 1 | 1 | 1 | 1 | 1 | 1 | 1 | 1 |
| 4 | 3 | 4 | 3 | 3 | 2 | 2 | 2 | 5 |
| 3 | 4 | 2 | 2 | 3 | 4 | 3 | 3 | 3 |
| 5 | 5 | 2 | 4 | 5 | 4 | 2 | 1 | 5 |
| 2 | 2 | 4 | 5 | 5 | 4 | 4 | 4 | 3 |
| 4 | 4 | 4 | 4 | 4 | 4 | 3 | 3 | 4 |
| 3 | 4 | 1 | 3 | 2 | 4 | 4 | 2 | 3 |
| 4 | 4 | 4 | 3 | 4 | 2 | 4 | 2 | 4 |
| 3 | 1 | 2 | 2 | 2 | 4 | 1 | 4 | 2 |
| 5 | 5 | 5 | 5 | 4 | 4 | 4 | 4 | 5 |
| 3 | 3 | 3 | 3 | 3 | 3 | 3 | 3 | 3 |
| 4 | 4 | 4 | 3 | 4 | 3 | 3 | 4 | 3 |
| 3 | 3 | 3 | 3 | 3 | 4 | 3 | 2 | 4 |
| 4 | 4 | 4 | 4 | 4 | 4 | 3 | 4 | 4 |
| 4 | 4 | 3 | 3 | 3 | 4 | 3 | 4 | 5 |
| 3 | 3 | 3 | 3 | 3 | 3 | 3 | 4 | 3 |
| 1 | 4 | 1 | 1 | 1 | 5 | 1 | 5 | 5 |
| 2 | 4 | 2 | 4 | 2 | 4 | 2 | 4 | 4 |
| 4 | 4 | 4 | 4 | 4 | 2 | 2 | 2 | 4 |
| 3 | 4 | 4 | 4 | 3 | 2 | 5 | 1 | 4 |
| 4 | 4 | 3 | 4 | 3 | 3 | 3 | 3 | 4 |
| 3 | 3 | 3 | 3 | 3 | 3 | 3 | 3 | 3 |
| 1 | 5 | 5 | 5 | 5 | 5 | 5 | 5 | 5 |
| 4 | 2 | 2 | 2 | 4 | 4 | 4 | 4 | 4 |
| 4 | 4 | 3 | 4 | 4 | 3 | 2 | 1 | 4 |
| 3 | 4 | 4 | 4 | 4 | 4 | 4 | 3 | 4 |
| 4 | 5 | 2 | 4 | 4 | 4 | 4 | 4 | 4 |
| 2 | 4 | 2 | 2 | 2 | 3 | 2 | 2 | 4 |
| 2 | 4 | 2 | 2 | 3 | 4 | 3 | 4 | 4 |
| 5 | 5 | 5 | 5 | 5 | 3 | 3 | 1 | 5 |
| 4 | 4 | 4 | 4 | 4 | 3 | 3 | 3 | 4 |
| 4 | 4 | 4 | 4 | 4 | 4 | 4 | 4 | 4 |
| 3 | 4 | 3 | 2 | 4 | 4 | 3 | 2 | 4 |
| 4 | 4 | 4 | 4 | 4 | 3 | 4 | 3 | 4 |
| 3 | 4 | 3 | 2 | 2 | 4 | 2 | 4 | 4 |
| 4 | 5 | 4 | 3 | 4 | 3 | 4 | 4 | 4 |
| 3 | 3 | 3 | 3 | 3 | 3 | 3 | 2 | 4 |
| 2 | 3 | 4 | 2 | 4 | 2 | 3 | 5 | 4 |
| 3 | 4 | 4 | 2 | 4 | 4 | 4 | 4 | 4 |
| 4 | 4 | 4 | 4 | 4 | 3 | 4 | 2 | 4 |
| 5 | 5 | 4 | 4 | 4 | 3 | 2 | 1 | 5 |
| 1 | 4 | 4 | 3 | 4 | 3 | 3 | 1 | 5 |
| 5 | 5 | 5 | 2 | 5 | 2 | 1 | 2 | 5 |

|   |   |   |   |   |   |   |   |   |
|---|---|---|---|---|---|---|---|---|
| 3 | 3 | 2 | 2 | 3 | 4 | 2 | 3 | 4 |
| 2 | 4 | 5 | 4 | 4 | 4 | 2 | 3 | 4 |
| 4 | 4 | 4 | 3 | 4 | 3 | 3 | 3 | 4 |
| 4 | 4 | 3 | 3 | 3 | 3 | 3 | 3 | 4 |
| 4 | 3 | 3 | 4 | 4 | 4 | 3 | 3 | 5 |
| 4 | 4 | 4 | 3 | 3 | 4 | 3 | 3 | 4 |
| 5 | 4 | 3 | 2 | 2 | 3 | 4 | 1 | 4 |
| 4 | 4 | 4 | 4 | 4 | 2 | 2 | 2 | 5 |
| 5 | 5 | 5 | 5 | 5 | 2 | 4 | 1 | 5 |
| 4 | 5 | 4 | 4 | 4 | 2 | 1 | 1 | 4 |
| 5 | 5 | 5 | 5 | 5 | 1 | 1 | 1 | 5 |
| 5 | 5 | 5 | 4 | 5 | 2 | 2 | 1 | 5 |
| 4 | 5 | 3 | 3 | 4 | 4 | 1 | 3 | 4 |
| 3 | 3 | 3 | 3 | 3 | 3 | 3 | 3 | 3 |
| 5 | 5 | 5 | 5 | 5 | 1 | 3 | 1 | 5 |
| 4 | 4 | 4 | 4 | 4 | 2 | 2 | 2 | 4 |
| 5 | 5 | 5 | 5 | 5 | 1 | 4 | 1 | 5 |
| 3 | 4 | 3 | 2 | 3 | 3 | 4 | 3 | 4 |
| 3 | 5 | 3 | 3 | 3 | 4 | 3 | 3 | 4 |
| 2 | 5 | 1 | 2 | 2 | 5 | 3 | 5 | 3 |
| 4 | 5 | 3 | 3 | 5 | 2 | 3 | 2 | 5 |
| 3 | 5 | 3 | 3 | 3 | 3 | 2 | 2 | 5 |
| 5 | 5 | 5 | 5 | 5 | 1 | 1 | 1 | 5 |
| 5 | 5 | 5 | 5 | 5 | 1 | 1 | 1 | 5 |
| 5 | 5 | 5 | 5 | 5 | 2 | 1 | 1 | 5 |
| 2 | 5 | 3 | 2 | 2 | 4 | 2 | 5 | 4 |
| 5 | 5 | 5 | 5 | 5 | 2 | 2 | 1 | 4 |
| 5 | 5 | 5 | 5 | 5 | 1 | 1 | 1 | 5 |
| 1 | 4 | 3 | 2 | 4 | 4 | 4 | 3 | 4 |
| 5 | 5 | 5 | 5 | 5 | 1 | 1 | 1 | 5 |
| 4 | 5 | 3 | 3 | 2 | 4 | 2 | 3 | 5 |
| 5 | 4 | 5 | 4 | 5 | 2 | 1 | 3 | 4 |
| 3 | 3 | 3 | 3 | 3 | 3 | 3 | 3 | 3 |
| 5 | 5 | 5 | 5 | 5 | 1 | 1 | 1 | 5 |
| 4 | 5 | 4 | 3 | 3 | 4 | 4 | 3 | 5 |
| 4 | 5 | 4 | 3 | 4 | 4 | 3 | 2 | 4 |
| 4 | 4 | 3 | 3 | 4 | 4 | 4 | 3 | 4 |
| 1 | 1 | 1 | 1 | 2 | 5 | 1 | 5 | 2 |
| 3 | 3 | 3 | 3 | 3 | 3 | 3 | 5 | 3 |
| 4 | 5 | 4 | 3 | 4 | 3 | 1 | 1 | 5 |
| 5 | 5 | 5 | 5 | 5 | 1 | 3 | 1 | 5 |
| 3 | 3 | 4 | 3 | 3 | 4 | 4 | 3 | 4 |
| 3 | 3 | 3 | 3 | 3 | 3 | 3 | 3 | 3 |
| 3 | 4 | 3 | 3 | 3 | 3 | 4 | 1 | 4 |
| 4 | 4 | 2 | 3 | 3 | 3 | 3 | 2 | 3 |
| 4 | 5 | 3 | 3 | 3 | 4 | 2 | 2 | 5 |
| 4 | 5 | 4 | 4 | 4 | 4 | 2 | 1 | 5 |
| 3 | 5 | 3 | 3 | 3 | 4 | 3 | 3 | 3 |
| 4 | 5 | 4 | 4 | 4 | 2 | 4 | 1 | 5 |
| 3 | 5 | 4 | 4 | 4 | 4 | 3 | 2 | 4 |
| 2 | 5 | 3 | 4 | 4 | 2 | 5 | 2 | 4 |
| 5 | 5 | 5 | 5 | 5 | 2 | 2 | 1 | 5 |
| 3 | 2 | 3 | 4 | 4 | 4 | 1 | 2 | 4 |
| 5 | 5 | 5 | 5 | 4 | 3 | 1 | 2 | 5 |

|   |   |   |   |   |   |   |   |   |
|---|---|---|---|---|---|---|---|---|
| 3 | 4 | 4 | 2 | 4 | 4 | 1 | 2 | 4 |
| 4 | 4 | 4 | 3 | 5 | 5 | 3 | 3 | 4 |
| 3 | 5 | 3 | 3 | 4 | 5 | 1 | 3 | 4 |
| 1 | 1 | 1 | 1 | 1 | 5 | 1 | 5 | 1 |
| 4 | 4 | 3 | 3 | 3 | 4 | 4 | 2 | 4 |
| 2 | 3 | 2 | 2 | 2 | 4 | 2 | 3 | 2 |
| 4 | 5 | 3 | 2 | 3 | 3 | 2 | 3 | 4 |
| 3 | 5 | 3 | 3 | 3 | 4 | 4 | 4 | 4 |
| 4 | 5 | 4 | 2 | 4 | 2 | 1 | 1 | 5 |
| 3 | 5 | 3 | 2 | 2 | 2 | 4 | 4 | 4 |
| 4 | 4 | 4 | 4 | 5 | 3 | 4 | 2 | 4 |
| 3 | 2 | 3 | 2 | 3 | 3 | 1 | 2 | 4 |
| 3 | 3 | 3 | 3 | 4 | 3 | 2 | 3 | 5 |
| 5 | 5 | 5 | 5 | 5 | 2 | 4 | 1 | 5 |
| 5 | 5 | 5 | 5 | 5 | 1 | 4 | 1 | 5 |
| 3 | 3 | 3 | 3 | 3 | 3 | 3 | 3 | 3 |
| 4 | 5 | 4 | 3 | 4 | 4 | 4 | 4 | 5 |
| 5 | 5 | 4 | 4 | 5 | 2 | 2 | 2 | 4 |
| 4 | 3 | 3 | 3 | 4 | 3 | 2 | 2 | 4 |
| 2 | 4 | 2 | 3 | 4 | 3 | 2 | 2 | 4 |
| 4 | 5 | 4 | 3 | 3 | 4 | 3 | 3 | 4 |
| 2 | 2 | 2 | 2 | 2 | 4 | 2 | 4 | 3 |
| 5 | 5 | 5 | 5 | 5 | 5 | 5 | 5 | 5 |
| 4 | 5 | 4 | 3 | 5 | 5 | 5 | 3 | 5 |
| 4 | 5 | 2 | 4 | 3 | 4 | 2 | 3 | 4 |
| 3 | 3 | 3 | 3 | 3 | 3 | 3 | 3 | 3 |
| 3 | 3 | 3 | 3 | 3 | 3 | 3 | 3 | 3 |
| 5 | 5 | 4 | 4 | 4 | 1 | 4 | 1 | 5 |
| 3 | 3 | 3 | 3 | 3 | 3 | 3 | 3 | 3 |
| 3 | 4 | 3 | 3 | 3 | 3 | 3 | 3 | 4 |
| 3 | 3 | 3 | 3 | 3 | 3 | 3 | 3 | 3 |
| 2 | 4 | 3 | 2 | 3 | 4 | 3 | 4 | 4 |
| 3 | 4 | 2 | 2 | 3 | 4 | 4 | 5 | 5 |
| 4 | 4 | 4 | 4 | 4 | 2 | 4 | 2 | 4 |
| 3 | 4 | 4 | 3 | 4 | 4 | 3 | 3 | 3 |
| 4 | 4 | 4 | 4 | 4 | 2 | 4 | 2 | 4 |
| 4 | 5 | 5 | 5 | 5 | 5 | 5 | 1 | 5 |
| 4 | 4 | 4 | 4 | 4 | 2 | 4 | 2 | 3 |
| 4 | 4 | 2 | 3 | 2 | 4 | 2 | 4 | 4 |
| 3 | 3 | 3 | 3 | 3 | 3 | 3 | 3 | 3 |
| 4 | 4 | 4 | 3 | 4 | 4 | 3 | 2 | 4 |
| 4 | 4 | 5 | 4 | 5 | 3 | 1 | 1 | 5 |
| 3 | 4 | 2 | 2 | 3 | 4 | 3 | 2 | 4 |
| 4 | 5 | 5 | 5 | 4 | 2 | 2 | 2 | 5 |
| 2 | 3 | 1 | 1 | 1 | 3 | 3 | 3 | 3 |
| 4 | 4 | 2 | 2 | 4 | 4 | 4 | 4 | 4 |
| 5 | 5 | 5 | 5 | 5 | 2 | 4 | 2 | 5 |
| 4 | 5 | 4 | 4 | 4 | 3 | 4 | 1 | 4 |
| 4 | 5 | 5 | 5 | 5 | 2 | 4 | 1 | 5 |
| 5 | 5 | 5 | 4 | 5 | 2 | 3 | 1 | 5 |
| 5 | 5 | 4 | 4 | 4 | 3 | 3 | 2 | 5 |
| 4 | 4 | 4 | 4 | 4 | 2 | 2 | 2 | 4 |
| 5 | 5 | 5 | 5 | 5 | 2 | 4 | 1 | 5 |
| 5 | 5 | 4 | 4 | 4 | 4 | 4 | 2 | 5 |

|   |   |   |   |   |   |   |   |   |
|---|---|---|---|---|---|---|---|---|
| 3 | 5 | 5 | 4 | 3 | 3 | 3 | 2 | 4 |
| 4 | 4 | 4 | 4 | 4 | 2 | 4 | 2 | 4 |
| 4 | 4 | 4 | 3 | 4 | 4 | 2 | 4 | 4 |
| 5 | 5 | 5 | 5 | 5 | 2 | 2 | 2 | 5 |
| 5 | 5 | 5 | 5 | 5 | 1 | 2 | 1 | 5 |
| 5 | 5 | 4 | 4 | 4 | 4 | 4 | 2 | 5 |

| C51 | C52 | C53 | C54 | C55 | C56 | C57 | C58 | C59 |   |
|-----|-----|-----|-----|-----|-----|-----|-----|-----|---|
| 5   | 5   | 5   | 5   | 5   | 5   | 5   | 5   | 5   | 5 |
| 4   | 2   | 2   | 3   | 1   | 1   | 3   | 1   | 4   |   |
| 5   | 5   | 5   | 5   | 5   | 5   | 5   | 5   | 5   | 5 |
| 5   | 5   | 5   | 5   | 5   | 5   | 5   | 5   | 5   | 5 |
| 3   | 3   | 3   | 3   | 3   | 3   | 3   | 3   | 3   | 3 |
| 5   | 5   | 5   | 4   | 5   | 5   | 5   | 5   | 5   | 5 |
| 5   | 5   | 5   | 5   | 5   | 5   | 5   | 5   | 5   | 5 |
| 1   | 2   | 2   | 5   | 5   | 2   | 3   | 2   | 4   |   |
| 5   | 5   | 5   | 5   | 5   | 5   | 5   | 5   | 5   | 5 |
| 5   | 5   | 5   | 5   | 2   | 3   | 1   | 1   | 4   |   |
| 5   | 5   | 5   | 5   | 4   | 4   | 3   | 2   | 4   |   |
| 3   | 4   | 3   | 4   | 4   | 2   | 3   | 2   | 3   |   |
| 5   | 5   | 5   | 5   | 1   | 5   | 1   | 1   | 5   |   |
| 5   | 5   | 5   | 5   | 5   | 5   | 5   | 5   | 5   | 5 |
| 4   | 5   | 3   | 5   | 5   | 5   | 4   | 3   | 2   |   |
| 5   | 5   | 5   | 5   | 5   | 5   | 5   | 5   | 5   | 5 |
| 5   | 4   | 3   | 4   | 4   | 2   | 2   | 1   | 3   |   |
| 5   | 5   | 5   | 5   | 5   | 5   | 5   | 5   | 5   | 5 |
| 4   | 4   | 3   | 4   | 4   | 3   | 3   | 2   | 4   |   |
| 5   | 4   | 3   | 4   | 4   | 2   | 2   | 2   | 5   |   |
| 5   | 5   | 5   | 5   | 5   | 5   | 5   | 5   | 5   | 5 |
| 5   | 5   | 5   | 5   | 5   | 5   | 5   | 5   | 5   | 5 |
| 5   | 5   | 5   | 5   | 2   | 5   | 2   | 1   | 5   |   |
| 5   | 5   | 5   | 5   | 4   | 1   | 1   | 1   | 5   |   |
| 4   | 2   | 2   | 2   | 4   | 4   | 4   | 4   | 2   |   |
| 4   | 4   | 4   | 4   | 4   | 3   | 3   | 2   | 4   |   |
| 3   | 3   | 3   | 3   | 3   | 3   | 2   | 2   | 1   |   |
| 4   | 5   | 4   | 4   | 4   | 3   | 4   | 2   | 4   |   |
| 5   | 5   | 4   | 5   | 2   | 3   | 2   | 1   | 4   |   |
| 5   | 5   | 3   | 4   | 4   | 4   | 4   | 3   | 3   |   |
| 5   | 5   | 5   | 5   | 2   | 3   | 2   | 2   | 5   |   |
| 5   | 5   | 5   | 5   | 1   | 4   | 1   | 1   | 5   |   |
| 5   | 5   | 4   | 4   | 4   | 3   | 2   | 2   | 4   |   |
| 4   | 4   | 4   | 5   | 5   | 4   | 4   | 5   | 5   |   |
| 5   | 5   | 3   | 4   | 4   | 3   | 2   | 2   | 4   |   |
| 5   | 4   | 4   | 4   | 4   | 4   | 4   | 5   | 3   |   |
| 5   | 5   | 5   | 4   | 2   | 5   | 4   | 1   | 4   |   |
| 5   | 5   | 5   | 5   | 5   | 5   | 5   | 5   | 5   | 5 |
| 5   | 5   | 5   | 5   | 2   | 3   | 1   | 2   | 5   |   |
| 5   | 5   | 5   | 5   | 1   | 3   | 1   | 1   | 5   |   |
| 4   | 4   | 4   | 4   | 2   | 2   | 2   | 1   | 4   |   |
| 4   | 4   | 4   | 4   | 2   | 4   | 2   | 2   | 4   |   |
| 5   | 5   | 5   | 5   | 2   | 5   | 2   | 2   | 3   |   |
| 5   | 5   | 5   | 4   | 2   | 4   | 2   | 1   | 3   |   |
| 4   | 4   | 4   | 4   | 4   | 4   | 4   | 2   | 4   |   |
| 4   | 4   | 4   | 4   | 4   | 4   | 4   | 4   | 4   | 4 |
| 5   | 5   | 5   | 4   | 4   | 4   | 4   | 4   | 4   | 4 |
| 5   | 5   | 5   | 5   | 5   | 5   | 5   | 5   | 5   | 5 |
| 2   | 2   | 2   | 3   | 2   | 2   | 2   | 2   | 2   | 2 |
| 2   | 4   | 2   | 4   | 4   | 4   | 4   | 4   | 4   | 4 |
| 5   | 5   | 5   | 5   | 5   | 5   | 2   | 2   | 5   |   |
| 5   | 4   | 4   | 5   | 3   | 5   | 1   | 1   | 4   |   |
| 3   | 4   | 3   | 4   | 3   | 3   | 3   | 2   | 4   |   |



|   |   |   |   |   |   |   |   |   |
|---|---|---|---|---|---|---|---|---|
| 3 | 3 | 3 | 3 | 3 | 3 | 3 | 3 | 3 |
| 4 | 4 | 3 | 4 | 4 | 4 | 2 | 2 | 4 |
| 5 | 3 | 4 | 3 | 4 | 4 | 3 | 5 | 3 |
| 5 | 5 | 5 | 5 | 5 | 5 | 5 | 5 | 5 |
| 5 | 5 | 5 | 5 | 2 | 3 | 5 | 2 | 3 |
| 5 | 5 | 3 | 5 | 5 | 5 | 1 | 1 | 4 |
| 5 | 5 | 5 | 5 | 1 | 3 | 1 | 1 | 5 |
| 5 | 5 | 5 | 5 | 5 | 5 | 5 | 5 | 5 |
| 4 | 4 | 2 | 4 | 5 | 4 | 3 | 2 | 2 |
| 5 | 4 | 4 | 3 | 5 | 5 | 2 | 1 | 5 |
| 4 | 4 | 4 | 4 | 3 | 3 | 2 | 2 | 4 |
| 4 | 4 | 4 | 4 | 4 | 5 | 4 | 2 | 4 |
| 5 | 5 | 5 | 5 | 1 | 5 | 1 | 1 | 5 |
| 3 | 2 | 2 | 2 | 2 | 4 | 3 | 3 | 4 |
| 4 | 4 | 4 | 4 | 2 | 4 | 2 | 2 | 4 |
| 5 | 5 | 4 | 4 | 3 | 3 | 3 | 1 | 3 |
| 5 | 5 | 5 | 5 | 1 | 5 | 1 | 1 | 5 |
| 3 | 5 | 2 | 3 | 2 | 5 | 2 | 4 | 3 |
| 5 | 5 | 4 | 3 | 4 | 4 | 3 | 2 | 4 |
| 5 | 3 | 3 | 3 | 4 | 3 | 3 | 2 | 3 |
| 4 | 5 | 4 | 4 | 3 | 4 | 2 | 2 | 4 |
| 5 | 4 | 4 | 4 | 2 | 4 | 2 | 2 | 4 |
| 3 | 3 | 3 | 3 | 3 | 3 | 3 | 3 | 3 |
| 3 | 3 | 3 | 3 | 3 | 3 | 3 | 3 | 3 |
| 3 | 3 | 3 | 3 | 3 | 3 | 3 | 3 | 3 |
| 3 | 4 | 3 | 2 | 5 | 4 | 4 | 3 | 2 |
| 5 | 4 | 3 | 3 | 4 | 5 | 2 | 2 | 4 |
| 3 | 3 | 3 | 3 | 3 | 3 | 3 | 3 | 3 |
| 4 | 3 | 3 | 3 | 3 | 3 | 3 | 3 | 3 |
| 3 | 3 | 3 | 3 | 3 | 4 | 3 | 2 | 2 |
| 3 | 3 | 3 | 3 | 4 | 3 | 4 | 3 | 3 |
| 4 | 4 | 3 | 3 | 2 | 2 | 3 | 2 | 4 |
| 4 | 5 | 5 | 5 | 2 | 1 | 1 | 1 | 4 |
| 3 | 3 | 3 | 3 | 3 | 3 | 3 | 3 | 3 |
| 5 | 5 | 5 | 5 | 3 | 5 | 5 | 5 | 5 |
| 5 | 5 | 5 | 5 | 1 | 5 | 1 | 1 | 5 |
| 5 | 5 | 5 | 5 | 4 | 5 | 1 | 1 | 5 |
| 4 | 3 | 3 | 3 | 4 | 2 | 3 | 2 | 3 |
| 3 | 3 | 3 | 3 | 3 | 3 | 3 | 3 | 3 |
| 5 | 5 | 5 | 4 | 1 | 3 | 1 | 1 | 4 |
| 3 | 3 | 3 | 3 | 3 | 4 | 4 | 2 | 3 |
| 5 | 5 | 5 | 5 | 3 | 3 | 2 | 2 | 4 |
| 3 | 3 | 3 | 3 | 5 | 3 | 3 | 3 | 3 |
| 5 | 5 | 5 | 5 | 1 | 3 | 1 | 1 | 5 |
| 4 | 4 | 2 | 4 | 3 | 2 | 4 | 2 | 3 |
| 4 | 4 | 2 | 4 | 3 | 3 | 1 | 1 | 4 |
| 3 | 4 | 3 | 4 | 3 | 4 | 3 | 4 | 4 |
| 5 | 3 | 3 | 4 | 3 | 5 | 3 | 2 | 3 |
| 5 | 5 | 5 | 5 | 1 | 5 | 1 | 1 | 5 |
| 5 | 2 | 3 | 4 | 3 | 3 | 4 | 3 | 2 |
| 4 | 2 | 2 | 2 | 4 | 4 | 4 | 2 | 2 |
| 5 | 5 | 5 | 5 | 1 | 5 | 5 | 1 | 5 |
| 2 | 2 | 2 | 2 | 2 | 2 | 2 | 2 | 2 |
| 4 | 4 | 3 | 2 | 4 | 4 | 3 | 3 | 2 |

|   |   |   |   |   |   |   |   |   |
|---|---|---|---|---|---|---|---|---|
| 3 | 4 | 4 | 5 | 4 | 1 | 2 | 3 | 3 |
| 4 | 1 | 4 | 1 | 5 | 5 | 5 | 5 | 5 |
| 5 | 5 | 5 | 5 | 4 | 5 | 5 | 1 | 5 |
| 5 | 5 | 5 | 5 | 1 | 5 | 5 | 1 | 5 |
| 5 | 5 | 5 | 5 | 1 | 5 | 1 | 1 | 5 |
| 5 | 4 | 5 | 5 | 4 | 4 | 4 | 1 | 2 |
| 5 | 3 | 3 | 3 | 4 | 3 | 3 | 2 | 4 |
| 5 | 3 | 3 | 4 | 4 | 5 | 2 | 1 | 4 |
| 5 | 5 | 5 | 5 | 2 | 5 | 1 | 1 | 5 |
| 3 | 3 | 3 | 3 | 3 | 3 | 3 | 3 | 3 |
| 4 | 3 | 3 | 3 | 3 | 3 | 3 | 3 | 3 |
| 5 | 5 | 4 | 4 | 3 | 4 | 4 | 1 | 4 |
| 5 | 5 | 5 | 5 | 1 | 3 | 1 | 2 | 3 |
| 5 | 5 | 4 | 4 | 2 | 3 | 2 | 2 | 4 |
| 5 | 5 | 4 | 4 | 2 | 3 | 3 | 3 | 4 |
| 4 | 4 | 4 | 4 | 4 | 2 | 4 | 2 | 4 |
| 5 | 5 | 5 | 5 | 3 | 2 | 3 | 3 | 4 |
| 5 | 5 | 2 | 5 | 4 | 4 | 3 | 2 | 4 |
| 5 | 4 | 3 | 3 | 3 | 2 | 1 | 2 | 5 |
| 4 | 4 | 4 | 3 | 3 | 4 | 4 | 4 | 4 |
| 4 | 4 | 2 | 3 | 4 | 3 | 3 | 2 | 4 |
| 5 | 5 | 5 | 5 | 1 | 5 | 1 | 1 | 5 |
| 3 | 3 | 3 | 3 | 3 | 2 | 3 | 3 | 3 |
| 3 | 3 | 3 | 3 | 3 | 3 | 3 | 3 | 3 |
| 4 | 2 | 2 | 2 | 4 | 2 | 4 | 3 | 2 |
| 4 | 2 | 2 | 2 | 4 | 2 | 4 | 3 | 2 |
| 4 | 3 | 3 | 1 | 4 | 4 | 5 | 2 | 2 |
| 4 | 3 | 2 | 2 | 5 | 4 | 5 | 5 | 2 |
| 5 | 3 | 3 | 3 | 5 | 5 | 4 | 2 | 2 |
| 5 | 5 | 5 | 5 | 1 | 5 | 1 | 1 | 5 |
| 4 | 4 | 4 | 4 | 3 | 4 | 2 | 2 | 4 |
| 5 | 4 | 4 | 4 | 2 | 3 | 2 | 2 | 4 |
| 4 | 3 | 3 | 3 | 3 | 2 | 2 | 3 | 3 |
| 5 | 1 | 1 | 1 | 5 | 5 | 5 | 5 | 1 |
| 5 | 5 | 2 | 3 | 2 | 1 | 3 | 1 | 3 |
| 5 | 5 | 5 | 5 | 1 | 3 | 1 | 1 | 5 |
| 5 | 3 | 5 | 5 | 2 | 4 | 2 | 2 | 5 |
| 5 | 5 | 5 | 5 | 5 | 5 | 5 | 2 | 5 |
| 5 | 5 | 3 | 4 | 4 | 4 | 3 | 1 | 4 |
| 4 | 4 | 3 | 4 | 4 | 3 | 4 | 4 | 5 |
| 5 | 4 | 3 | 4 | 2 | 4 | 1 | 1 | 3 |
| 5 | 2 | 1 | 1 | 5 | 4 | 4 | 2 | 2 |
| 3 | 3 | 3 | 3 | 3 | 3 | 3 | 3 | 3 |
| 4 | 1 | 1 | 1 | 5 | 3 | 4 | 3 | 2 |
| 3 | 5 | 3 | 4 | 4 | 3 | 1 | 1 | 2 |
| 5 | 5 | 5 | 5 | 2 | 2 | 2 | 1 | 4 |
| 4 | 3 | 3 | 3 | 3 | 3 | 3 | 3 | 3 |
| 5 | 5 | 5 | 5 | 2 | 3 | 1 | 1 | 3 |
| 5 | 5 | 3 | 4 | 4 | 5 | 2 | 2 | 4 |
| 4 | 3 | 2 | 3 | 4 | 4 | 2 | 2 | 2 |
| 5 | 4 | 4 | 4 | 3 | 5 | 2 | 1 | 5 |
| 5 | 5 | 5 | 5 | 5 | 5 | 5 | 5 | 5 |
| 5 | 4 | 4 | 4 | 5 | 5 | 4 | 3 | 3 |
| 3 | 4 | 3 | 4 | 3 | 3 | 2 | 2 | 3 |

|   |   |   |   |   |   |   |   |   |
|---|---|---|---|---|---|---|---|---|
| 4 | 4 | 3 | 3 | 3 | 2 | 1 | 1 | 5 |
| 5 | 4 | 3 | 3 | 4 | 3 | 3 | 2 | 3 |
| 5 | 5 | 5 | 5 | 1 | 5 | 1 | 1 | 5 |
| 4 | 3 | 3 | 3 | 4 | 4 | 2 | 2 | 3 |
| 5 | 4 | 4 | 3 | 5 | 4 | 3 | 1 | 4 |
| 4 | 4 | 3 | 4 | 2 | 3 | 2 | 2 | 4 |
| 4 | 4 | 3 | 4 | 3 | 3 | 2 | 2 | 3 |
| 4 | 4 | 4 | 4 | 2 | 4 | 2 | 2 | 4 |
| 2 | 2 | 2 | 2 | 4 | 3 | 4 | 4 | 2 |
| 4 | 4 | 2 | 3 | 4 | 1 | 2 | 1 | 3 |
| 5 | 5 | 4 | 1 | 4 | 3 | 4 | 1 | 2 |
| 5 | 5 | 5 | 5 | 1 | 5 | 1 | 1 | 4 |
| 3 | 3 | 3 | 3 | 3 | 3 | 3 | 3 | 3 |
| 5 | 5 | 5 | 5 | 1 | 5 | 1 | 1 | 5 |
| 4 | 3 | 3 | 3 | 3 | 3 | 3 | 3 | 3 |
| 5 | 5 | 3 | 4 | 5 | 2 | 1 | 1 | 3 |
| 5 | 5 | 4 | 4 | 4 | 4 | 1 | 1 | 4 |
| 4 | 4 | 3 | 4 | 2 | 3 | 2 | 2 | 4 |
| 2 | 1 | 3 | 1 | 1 | 2 | 4 | 1 | 3 |
| 5 | 5 | 5 | 5 | 1 | 5 | 1 | 1 | 4 |
| 5 | 3 | 3 | 4 | 4 | 5 | 5 | 2 | 3 |
| 5 | 5 | 5 | 5 | 4 | 5 | 1 | 1 | 5 |
| 5 | 3 | 4 | 4 | 4 | 4 | 2 | 1 | 3 |
| 5 | 5 | 5 | 5 | 1 | 4 | 1 | 1 | 5 |
| 3 | 3 | 3 | 3 | 5 | 4 | 5 | 3 | 1 |
| 3 | 3 | 4 | 3 | 5 | 4 | 4 | 4 | 5 |
| 4 | 4 | 2 | 4 | 4 | 2 | 2 | 2 | 4 |
| 3 | 3 | 3 | 3 | 2 | 1 | 1 | 4 | 4 |
| 4 | 1 | 1 | 1 | 5 | 4 | 5 | 5 | 2 |
| 3 | 5 | 5 | 5 | 5 | 3 | 5 | 1 | 3 |
| 4 | 4 | 3 | 3 | 4 | 4 | 4 | 2 | 4 |
| 5 | 5 | 5 | 5 | 1 | 4 | 1 | 1 | 5 |
| 5 | 5 | 4 | 5 | 1 | 1 | 1 | 1 | 5 |
| 5 | 5 | 3 | 3 | 4 | 3 | 1 | 1 | 3 |
| 3 | 3 | 3 | 3 | 3 | 3 | 3 | 3 | 3 |
| 5 | 5 | 5 | 4 | 2 | 4 | 2 | 1 | 3 |
| 4 | 3 | 3 | 3 | 3 | 3 | 3 | 3 | 3 |
| 5 | 5 | 5 | 5 | 2 | 3 | 2 | 2 | 5 |
| 5 | 4 | 3 | 3 | 4 | 4 | 3 | 2 | 4 |
| 5 | 5 | 5 | 5 | 2 | 4 | 2 | 2 | 5 |
| 4 | 4 | 4 | 4 | 4 | 4 | 4 | 3 | 4 |
| 4 | 4 | 4 | 4 | 4 | 4 | 4 | 4 | 4 |
| 5 | 5 | 5 | 5 | 5 | 5 | 5 | 5 | 5 |
| 5 | 5 | 4 | 5 | 2 | 3 | 3 | 2 | 4 |
| 4 | 3 | 3 | 3 | 3 | 3 | 3 | 3 | 3 |
| 4 | 4 | 3 | 3 | 4 | 4 | 3 | 2 | 4 |
| 3 | 3 | 3 | 3 | 3 | 3 | 3 | 3 | 3 |
| 5 | 5 | 5 | 5 | 1 | 5 | 1 | 1 | 5 |
| 5 | 5 | 5 | 5 | 1 | 1 | 1 | 1 | 5 |
| 5 | 5 | 5 | 5 | 1 | 1 | 1 | 1 | 5 |
| 4 | 5 | 5 | 5 | 1 | 5 | 1 | 1 | 4 |
| 3 | 4 | 3 | 4 | 2 | 3 | 3 | 1 | 4 |
| 3 | 3 | 3 | 3 | 3 | 3 | 3 | 3 | 3 |
| 4 | 3 | 3 | 4 | 4 | 3 | 4 | 4 | 2 |



|   |   |   |   |   |   |   |   |   |
|---|---|---|---|---|---|---|---|---|
| 5 | 5 | 5 | 5 | 4 | 5 | 1 | 1 | 5 |
| 5 | 1 | 1 | 1 | 1 | 1 | 1 | 1 | 4 |
| 4 | 4 | 2 | 3 | 1 | 5 | 2 | 4 | 2 |
| 3 | 3 | 3 | 3 | 3 | 3 | 3 | 3 | 3 |
| 3 | 3 | 3 | 3 | 3 | 4 | 2 | 1 | 2 |
| 5 | 5 | 5 | 5 | 1 | 4 | 1 | 1 | 5 |
| 5 | 5 | 5 | 5 | 1 | 1 | 1 | 1 | 5 |
| 5 | 5 | 5 | 5 | 4 | 5 | 2 | 1 | 5 |
| 5 | 3 | 2 | 3 | 5 | 5 | 5 | 2 | 2 |
| 5 | 3 | 3 | 3 | 5 | 5 | 5 | 3 | 1 |
| 4 | 4 | 4 | 4 | 4 | 4 | 2 | 2 | 3 |
| 5 | 5 | 4 | 4 | 2 | 5 | 1 | 1 | 4 |
| 4 | 2 | 2 | 4 | 4 | 4 | 2 | 2 | 4 |
| 4 | 4 | 3 | 4 | 4 | 1 | 1 | 1 | 4 |
| 5 | 5 | 5 | 5 | 4 | 3 | 1 | 1 | 4 |
| 5 | 5 | 5 | 5 | 2 | 2 | 2 | 5 | 5 |
| 3 | 3 | 3 | 3 | 3 | 3 | 3 | 3 | 3 |
| 5 | 5 | 5 | 5 | 4 | 5 | 2 | 2 | 4 |
| 5 | 4 | 5 | 5 | 1 | 2 | 1 | 5 | 5 |
| 4 | 3 | 3 | 4 | 4 | 4 | 3 | 2 | 2 |
| 4 | 4 | 4 | 4 | 2 | 4 | 1 | 1 | 2 |
| 5 | 4 | 3 | 3 | 4 | 4 | 2 | 2 | 4 |
| 5 | 5 | 5 | 2 | 2 | 3 | 1 | 1 | 5 |
| 4 | 2 | 2 | 2 | 4 | 4 | 3 | 2 | 2 |
| 3 | 3 | 3 | 4 | 3 | 3 | 4 | 3 | 4 |
| 5 | 3 | 1 | 1 | 5 | 3 | 5 | 3 | 1 |
| 5 | 5 | 4 | 5 | 3 | 3 | 2 | 2 | 4 |
| 4 | 3 | 3 | 4 | 4 | 3 | 2 | 4 | 4 |
| 5 | 3 | 5 | 1 | 3 | 2 | 5 | 5 | 5 |
| 5 | 5 | 5 | 5 | 2 | 5 | 1 | 1 | 4 |
| 4 | 5 | 5 | 4 | 2 | 3 | 3 | 1 | 4 |
| 4 | 4 | 4 | 4 | 4 | 4 | 3 | 1 | 4 |
| 1 | 1 | 1 | 3 | 3 | 3 | 3 | 3 | 3 |
| 5 | 5 | 5 | 5 | 5 | 5 | 5 | 5 | 5 |
| 3 | 3 | 3 | 3 | 3 | 3 | 3 | 3 | 3 |
| 4 | 3 | 3 | 3 | 4 | 5 | 4 | 3 | 4 |
| 3 | 2 | 4 | 4 | 1 | 3 | 1 | 1 | 3 |
| 4 | 4 | 3 | 4 | 2 | 4 | 2 | 2 | 4 |
| 4 | 3 | 3 | 3 | 4 | 2 | 4 | 4 | 2 |
| 4 | 3 | 4 | 2 | 3 | 4 | 4 | 4 | 3 |
| 4 | 4 | 4 | 4 | 4 | 4 | 2 | 2 | 4 |
| 3 | 3 | 3 | 3 | 4 | 3 | 3 | 3 | 3 |
| 5 | 4 | 3 | 3 | 3 | 3 | 2 | 2 | 4 |
| 4 | 4 | 4 | 4 | 4 | 4 | 4 | 2 | 4 |
| 4 | 4 | 4 | 4 | 4 | 4 | 4 | 4 | 4 |
| 4 | 2 | 3 | 2 | 4 | 3 | 3 | 3 | 2 |
| 4 | 4 | 4 | 4 | 3 | 5 | 4 | 4 | 3 |
| 4 | 4 | 4 | 4 | 2 | 4 | 2 | 2 | 4 |
| 4 | 3 | 4 | 4 | 2 | 2 | 2 | 2 | 3 |
| 5 | 4 | 3 | 3 | 5 | 3 | 4 | 1 | 4 |
| 4 | 3 | 3 | 3 | 4 | 2 | 3 | 2 | 1 |
| 5 | 5 | 5 | 5 | 4 | 2 | 2 | 2 | 5 |
| 5 | 5 | 5 | 5 | 5 | 4 | 2 | 1 | 4 |
| 4 | 2 | 2 | 2 | 4 | 4 | 4 | 4 | 4 |

|   |   |   |   |   |   |   |   |   |
|---|---|---|---|---|---|---|---|---|
| 5 | 5 | 4 | 4 | 3 | 2 | 2 | 1 | 5 |
| 5 | 5 | 4 | 5 | 4 | 2 | 3 | 2 | 5 |
| 3 | 3 | 3 | 3 | 3 | 3 | 3 | 3 | 3 |
| 5 | 5 | 4 | 4 | 2 | 2 | 2 | 2 | 4 |
| 4 | 4 | 4 | 4 | 4 | 5 | 4 | 4 | 4 |
| 4 | 4 | 4 | 2 | 4 | 2 | 2 | 4 | 4 |
| 5 | 5 | 5 | 5 | 2 | 2 | 2 | 1 | 4 |
| 4 | 5 | 5 | 5 | 5 | 4 | 2 | 2 | 4 |
| 4 | 4 | 2 | 4 | 4 | 4 | 2 | 2 | 4 |
| 5 | 4 | 3 | 3 | 3 | 3 | 4 | 1 | 3 |
| 4 | 3 | 2 | 2 | 4 | 2 | 4 | 2 | 4 |
| 4 | 4 | 4 | 4 | 2 | 3 | 2 | 2 | 4 |
| 4 | 4 | 4 | 4 | 1 | 4 | 1 | 1 | 4 |
| 4 | 4 | 4 | 4 | 3 | 3 | 2 | 2 | 4 |
| 3 | 3 | 3 | 3 | 4 | 3 | 2 | 2 | 4 |
| 4 | 4 | 4 | 4 | 4 | 4 | 4 | 4 | 4 |
| 4 | 4 | 4 | 4 | 4 | 4 | 1 | 4 | 4 |
| 5 | 5 | 5 | 5 | 2 | 3 | 2 | 2 | 4 |
| 4 | 4 | 3 | 4 | 4 | 3 | 3 | 2 | 4 |
| 3 | 3 | 3 | 3 | 3 | 3 | 3 | 3 | 3 |
| 4 | 4 | 3 | 3 | 3 | 3 | 3 | 1 | 3 |
| 3 | 3 | 3 | 3 | 3 | 3 | 3 | 3 | 3 |
| 5 | 5 | 5 | 5 | 3 | 3 | 2 | 1 | 4 |
| 5 | 5 | 3 | 3 | 4 | 4 | 4 | 2 | 4 |
| 5 | 5 | 5 | 5 | 4 | 4 | 2 | 2 | 4 |
| 5 | 5 | 2 | 4 | 2 | 5 | 1 | 1 | 5 |
| 4 | 4 | 4 | 4 | 4 | 4 | 2 | 2 | 4 |
| 4 | 2 | 2 | 4 | 5 | 5 | 4 | 2 | 2 |
| 5 | 2 | 4 | 4 | 4 | 4 | 2 | 1 | 4 |
| 4 | 3 | 3 | 3 | 4 | 3 | 3 | 3 | 3 |
| 4 | 5 | 5 | 5 | 4 | 2 | 4 | 2 | 4 |
| 4 | 4 | 4 | 4 | 4 | 3 | 2 | 2 | 4 |
| 4 | 4 | 4 | 4 | 4 | 4 | 2 | 3 | 4 |
| 4 | 3 | 3 | 3 | 4 | 4 | 3 | 3 | 4 |
| 4 | 4 | 4 | 4 | 2 | 4 | 2 | 2 | 4 |
| 3 | 3 | 3 | 3 | 4 | 4 | 3 | 2 | 2 |
| 5 | 2 | 2 | 2 | 5 | 2 | 3 | 1 | 3 |
| 4 | 4 | 4 | 4 | 4 | 4 | 4 | 4 | 3 |
| 5 | 4 | 3 | 4 | 3 | 4 | 2 | 2 | 4 |
| 5 | 5 | 5 | 5 | 4 | 5 | 3 | 3 | 3 |
| 5 | 2 | 2 | 2 | 4 | 4 | 4 | 2 | 2 |
| 4 | 4 | 4 | 4 | 4 | 4 | 4 | 2 | 2 |
| 4 | 3 | 3 | 3 | 4 | 3 | 4 | 3 | 3 |
| 4 | 3 | 3 | 4 | 4 | 4 | 4 | 2 | 3 |
| 5 | 3 | 3 | 4 | 5 | 4 | 4 | 2 | 3 |
| 4 | 4 | 4 | 4 | 3 | 4 | 4 | 4 | 4 |
| 5 | 3 | 3 | 3 | 5 | 3 | 4 | 1 | 3 |
| 5 | 5 | 5 | 5 | 2 | 2 | 1 | 2 | 5 |
| 5 | 5 | 5 | 5 | 1 | 2 | 1 | 2 | 5 |
| 4 | 4 | 4 | 3 | 4 | 4 | 4 | 2 | 4 |
| 5 | 5 | 5 | 5 | 1 | 3 | 1 | 1 | 5 |
| 5 | 5 | 5 | 5 | 2 | 5 | 5 | 1 | 4 |
| 4 | 4 | 4 | 4 | 4 | 5 | 5 | 3 | 5 |
| 3 | 3 | 3 | 4 | 4 | 4 | 2 | 2 | 4 |

|   |   |   |   |   |   |   |   |   |
|---|---|---|---|---|---|---|---|---|
| 4 | 4 | 4 | 4 | 3 | 3 | 2 | 2 | 4 |
| 5 | 5 | 5 | 5 | 1 | 5 | 2 | 1 | 5 |
| 5 | 5 | 5 | 5 | 4 | 5 | 4 | 2 | 4 |
| 2 | 2 | 1 | 2 | 5 | 4 | 4 | 3 | 3 |
| 4 | 3 | 3 | 3 | 4 | 4 | 4 | 2 | 2 |
| 5 | 5 | 5 | 5 | 1 | 5 | 2 | 2 | 5 |
| 4 | 4 | 3 | 4 | 4 | 4 | 2 | 1 | 4 |
| 5 | 4 | 2 | 1 | 3 | 4 | 2 | 1 | 4 |
| 4 | 4 | 3 | 4 | 4 | 4 | 2 | 2 | 4 |
| 4 | 1 | 1 | 4 | 1 | 2 | 4 | 3 | 2 |
| 5 | 4 | 4 | 4 | 3 | 3 | 3 | 2 | 4 |
| 5 | 4 | 3 | 3 | 4 | 2 | 3 | 2 | 4 |
| 4 | 4 | 4 | 4 | 2 | 2 | 2 | 2 | 4 |
| 5 | 4 | 4 | 4 | 5 | 3 | 4 | 2 | 4 |
| 5 | 5 | 3 | 3 | 3 | 3 | 3 | 1 | 3 |
| 4 | 3 | 3 | 4 | 4 | 3 | 3 | 3 | 3 |
| 4 | 2 | 2 | 4 | 4 | 4 | 4 | 1 | 2 |
| 3 | 3 | 3 | 3 | 3 | 3 | 3 | 3 | 3 |
| 5 | 5 | 5 | 5 | 1 | 5 | 5 | 5 | 5 |
| 3 | 4 | 4 | 5 | 4 | 5 | 3 | 3 | 3 |
| 4 | 4 | 4 | 3 | 3 | 4 | 4 | 3 | 3 |
| 5 | 5 | 5 | 5 | 1 | 4 | 1 | 1 | 5 |
| 5 | 4 | 5 | 5 | 3 | 5 | 3 | 2 | 4 |
| 5 | 5 | 5 | 5 | 2 | 5 | 2 | 2 | 5 |
| 1 | 1 | 1 | 1 | 5 | 5 | 5 | 3 | 3 |
| 3 | 3 | 2 | 3 | 4 | 4 | 3 | 3 | 2 |
| 5 | 5 | 5 | 5 | 2 | 5 | 3 | 1 | 5 |
| 5 | 3 | 5 | 3 | 4 | 5 | 3 | 1 | 3 |
| 4 | 4 | 3 | 3 | 4 | 4 | 3 | 2 | 3 |
| 3 | 3 | 3 | 3 | 3 | 3 | 3 | 3 | 3 |
| 5 | 5 | 4 | 3 | 4 | 3 | 1 | 1 | 4 |
| 3 | 3 | 3 | 3 | 3 | 3 | 3 | 3 | 3 |
| 5 | 5 | 5 | 5 | 2 | 4 | 2 | 2 | 4 |
| 2 | 2 | 2 | 1 | 5 | 4 | 5 | 4 | 1 |
| 4 | 2 | 3 | 2 | 4 | 4 | 3 | 2 | 2 |
| 4 | 3 | 2 | 3 | 4 | 4 | 4 | 2 | 2 |
| 5 | 4 | 4 | 4 | 4 | 3 | 2 | 1 | 1 |
| 4 | 4 | 4 | 4 | 3 | 4 | 2 | 2 | 2 |
| 4 | 3 | 3 | 3 | 3 | 4 | 2 | 2 | 5 |
| 5 | 2 | 2 | 2 | 5 | 5 | 5 | 2 | 4 |
| 2 | 5 | 3 | 3 | 4 | 4 | 1 | 1 | 4 |
| 3 | 3 | 3 | 3 | 3 | 3 | 3 | 3 | 3 |
| 5 | 3 | 2 | 3 | 4 | 4 | 4 | 2 | 3 |
| 5 | 5 | 4 | 4 | 4 | 1 | 4 | 4 | 3 |
| 4 | 4 | 4 | 4 | 4 | 4 | 4 | 4 | 4 |
| 4 | 4 | 4 | 4 | 4 | 2 | 4 | 2 | 4 |
| 4 | 4 | 4 | 4 | 2 | 2 | 2 | 2 | 4 |
| 1 | 1 | 1 | 1 | 1 | 1 | 2 | 1 | 5 |
| 4 | 4 | 4 | 4 | 1 | 1 | 1 | 1 | 4 |
| 4 | 4 | 4 | 4 | 3 | 5 | 1 | 1 | 4 |
| 3 | 3 | 3 | 3 | 3 | 3 | 3 | 3 | 3 |
| 3 | 3 | 3 | 5 | 5 | 5 | 3 | 3 | 4 |
| 4 | 2 | 2 | 3 | 4 | 3 | 4 | 4 | 3 |
| 5 | 4 | 3 | 3 | 4 | 2 | 3 | 2 | 3 |

|   |   |   |   |   |   |   |   |   |
|---|---|---|---|---|---|---|---|---|
| 4 | 4 | 4 | 4 | 4 | 4 | 2 | 2 | 4 |
| 4 | 4 | 2 | 3 | 4 | 4 | 4 | 3 | 3 |
| 3 | 3 | 3 | 3 | 3 | 3 | 3 | 3 | 3 |
| 4 | 4 | 4 | 4 | 2 | 4 | 3 | 2 | 4 |
| 5 | 3 | 3 | 2 | 5 | 1 | 5 | 5 | 1 |
| 5 | 4 | 3 | 4 | 3 | 2 | 3 | 1 | 3 |
| 5 | 5 | 5 | 5 | 2 | 4 | 2 | 1 | 4 |
| 3 | 3 | 3 | 3 | 3 | 3 | 2 | 2 | 3 |
| 5 | 5 | 5 | 5 | 1 | 4 | 1 | 1 | 5 |
| 5 | 5 | 5 | 5 | 1 | 1 | 1 | 5 | 5 |
| 4 | 4 | 4 | 4 | 4 | 2 | 4 | 4 | 4 |
| 4 | 3 | 4 | 4 | 4 | 4 | 5 | 3 | 5 |
| 5 | 5 | 5 | 5 | 3 | 3 | 1 | 1 | 5 |
| 4 | 4 | 3 | 4 | 4 | 4 | 4 | 4 | 4 |
| 4 | 4 | 4 | 4 | 4 | 4 | 4 | 2 | 4 |
| 5 | 5 | 5 | 5 | 1 | 5 | 1 | 1 | 5 |
| 3 | 3 | 3 | 3 | 3 | 3 | 3 | 3 | 3 |
| 4 | 4 | 3 | 3 | 4 | 4 | 4 | 3 | 3 |
| 5 | 4 | 4 | 4 | 5 | 3 | 3 | 1 | 4 |
| 4 | 4 | 4 | 4 | 4 | 3 | 3 | 2 | 4 |
| 5 | 3 | 3 | 3 | 4 | 4 | 3 | 3 | 3 |
| 4 | 4 | 4 | 4 | 4 | 4 | 2 | 2 | 4 |
| 3 | 3 | 2 | 2 | 4 | 3 | 3 | 2 | 4 |
| 4 | 4 | 4 | 4 | 4 | 4 | 4 | 2 | 4 |
| 4 | 4 | 2 | 3 | 4 | 4 | 3 | 2 | 3 |
| 5 | 1 | 1 | 1 | 5 | 3 | 3 | 3 | 4 |
| 5 | 5 | 5 | 5 | 1 | 2 | 1 | 1 | 5 |
| 5 | 3 | 3 | 4 | 4 | 4 | 4 | 3 | 3 |
| 5 | 5 | 5 | 5 | 4 | 1 | 1 | 1 | 5 |
| 4 | 4 | 2 | 4 | 4 | 4 | 4 | 4 | 2 |
| 3 | 3 | 3 | 3 | 3 | 3 | 3 | 3 | 3 |
| 5 | 5 | 5 | 5 | 2 | 5 | 2 | 2 | 5 |
| 4 | 4 | 3 | 3 | 3 | 4 | 3 | 2 | 3 |
| 4 | 4 | 3 | 4 | 2 | 3 | 2 | 2 | 4 |
| 5 | 5 | 5 | 5 | 1 | 5 | 1 | 1 | 5 |
| 3 | 3 | 3 | 3 | 4 | 4 | 3 | 2 | 3 |
| 5 | 5 | 3 | 5 | 2 | 4 | 2 | 2 | 5 |
| 4 | 4 | 4 | 4 | 3 | 3 | 3 | 3 | 4 |
| 5 | 4 | 3 | 3 | 5 | 5 | 5 | 5 | 5 |
| 4 | 4 | 4 | 4 | 4 | 4 | 3 | 2 | 4 |
| 4 | 4 | 3 | 2 | 3 | 3 | 3 | 2 | 4 |
| 5 | 4 | 3 | 5 | 4 | 4 | 4 | 4 | 3 |
| 4 | 2 | 2 | 2 | 4 | 3 | 4 | 2 | 2 |
| 4 | 4 | 3 | 4 | 4 | 5 | 2 | 2 | 4 |
| 5 | 5 | 4 | 5 | 2 | 2 | 2 | 1 | 4 |
| 5 | 5 | 3 | 4 | 1 | 2 | 1 | 1 | 4 |
| 3 | 3 | 3 | 3 | 4 | 4 | 3 | 4 | 1 |
| 4 | 4 | 4 | 4 | 2 | 4 | 2 | 2 | 4 |
| 3 | 3 | 3 | 3 | 4 | 3 | 4 | 4 | 3 |
| 4 | 3 | 3 | 3 | 4 | 3 | 3 | 3 | 3 |
| 4 | 4 | 4 | 4 | 2 | 2 | 2 | 2 | 4 |
| 3 | 3 | 3 | 3 | 3 | 3 | 3 | 3 | 3 |
| 4 | 4 | 4 | 4 | 4 | 4 | 3 | 3 | 4 |
| 4 | 3 | 3 | 4 | 4 | 4 | 3 | 2 | 3 |



|   |   |   |   |   |   |   |   |   |
|---|---|---|---|---|---|---|---|---|
| 4 | 4 | 4 | 4 | 4 | 3 | 2 | 4 | 4 |
| 4 | 3 | 4 | 3 | 3 | 5 | 4 | 4 | 3 |
| 4 | 4 | 4 | 4 | 4 | 4 | 3 | 2 | 3 |
| 4 | 2 | 2 | 2 | 4 | 2 | 4 | 1 | 4 |
| 4 | 4 | 4 | 4 | 4 | 2 | 3 | 2 | 3 |
| 3 | 4 | 3 | 4 | 2 | 3 | 2 | 2 | 4 |
| 2 | 2 | 2 | 2 | 3 | 3 | 2 | 3 | 2 |
| 4 | 2 | 2 | 2 | 4 | 2 | 3 | 3 | 2 |
| 5 | 3 | 2 | 3 | 3 | 4 | 4 | 4 | 3 |
| 3 | 3 | 3 | 3 | 3 | 3 | 3 | 3 | 3 |
| 5 | 5 | 4 | 4 | 4 | 5 | 3 | 2 | 4 |
| 5 | 4 | 3 | 3 | 4 | 4 | 1 | 1 | 3 |
| 2 | 5 | 3 | 1 | 2 | 5 | 2 | 3 | 5 |
| 5 | 5 | 3 | 5 | 5 | 2 | 2 | 1 | 3 |
| 4 | 4 | 3 | 4 | 3 | 2 | 4 | 2 | 4 |
| 5 | 4 | 2 | 3 | 3 | 3 | 1 | 1 | 4 |
| 4 | 2 | 3 | 3 | 4 | 4 | 4 | 2 | 2 |
| 4 | 4 | 3 | 3 | 4 | 2 | 3 | 2 | 3 |
| 4 | 5 | 2 | 4 | 4 | 3 | 2 | 1 | 4 |
| 5 | 4 | 4 | 4 | 4 | 5 | 2 | 1 | 4 |
| 4 | 3 | 3 | 3 | 4 | 3 | 3 | 3 | 2 |
| 4 | 4 | 4 | 4 | 4 | 4 | 4 | 4 | 4 |
| 3 | 4 | 3 | 2 | 2 | 3 | 3 | 3 | 5 |
| 3 | 3 | 3 | 3 | 3 | 3 | 3 | 3 | 3 |
| 5 | 5 | 5 | 5 | 1 | 4 | 2 | 1 | 5 |
| 5 | 3 | 1 | 3 | 5 | 3 | 3 | 3 | 5 |
| 4 | 3 | 3 | 3 | 3 | 4 | 3 | 2 | 4 |
| 4 | 4 | 4 | 4 | 3 | 4 | 2 | 2 | 3 |
| 3 | 4 | 4 | 4 | 3 | 3 | 2 | 1 | 4 |
| 4 | 4 | 3 | 3 | 4 | 1 | 3 | 2 | 3 |
| 1 | 4 | 3 | 4 | 4 | 3 | 3 | 3 | 3 |
| 4 | 4 | 4 | 4 | 2 | 3 | 2 | 2 | 4 |
| 4 | 4 | 4 | 4 | 4 | 4 | 4 | 4 | 4 |
| 4 | 4 | 4 | 4 | 3 | 4 | 2 | 3 | 3 |
| 4 | 5 | 4 | 4 | 3 | 4 | 2 | 2 | 4 |
| 3 | 3 | 3 | 3 | 3 | 3 | 3 | 3 | 3 |
| 5 | 5 | 5 | 5 | 5 | 5 | 5 | 5 | 5 |
| 5 | 5 | 5 | 5 | 3 | 1 | 1 | 1 | 5 |
| 4 | 2 | 4 | 3 | 4 | 4 | 4 | 4 | 3 |
| 5 | 5 | 5 | 5 | 3 | 5 | 5 | 1 | 5 |
| 4 | 4 | 4 | 4 | 4 | 4 | 4 | 4 | 4 |
| 3 | 2 | 2 | 3 | 2 | 3 | 3 | 2 | 2 |
| 4 | 5 | 4 | 4 | 2 | 3 | 2 | 2 | 2 |
| 4 | 4 | 4 | 4 | 4 | 3 | 2 | 2 | 4 |
| 4 | 4 | 3 | 4 | 4 | 4 | 4 | 4 | 4 |
| 4 | 2 | 2 | 3 | 4 | 4 | 3 | 3 | 3 |
| 4 | 4 | 4 | 4 | 2 | 4 | 2 | 2 | 4 |
| 5 | 4 | 4 | 4 | 2 | 3 | 3 | 2 | 4 |
| 4 | 4 | 4 | 4 | 1 | 4 | 1 | 2 | 4 |
| 5 | 5 | 5 | 5 | 4 | 4 | 2 | 2 | 4 |
| 4 | 4 | 3 | 4 | 2 | 4 | 2 | 2 | 4 |
| 4 | 4 | 4 | 4 | 3 | 3 | 3 | 3 | 3 |
| 5 | 5 | 5 | 5 | 3 | 5 | 2 | 2 | 5 |
| 5 | 5 | 5 | 5 | 3 | 1 | 1 | 1 | 5 |

|   |   |   |   |   |   |   |   |   |
|---|---|---|---|---|---|---|---|---|
| 5 | 5 | 5 | 5 | 5 | 5 | 1 | 1 | 5 |
| 5 | 5 | 5 | 5 | 2 | 5 | 1 | 1 | 5 |
| 4 | 4 | 3 | 3 | 2 | 2 | 1 | 2 | 4 |
| 4 | 4 | 4 | 4 | 4 | 4 | 2 | 2 | 4 |
| 5 | 5 | 5 | 5 | 1 | 4 | 1 | 1 | 5 |
| 5 | 5 | 5 | 5 | 1 | 5 | 1 | 1 | 5 |
| 5 | 5 | 5 | 5 | 4 | 2 | 2 | 2 | 4 |
| 5 | 5 | 5 | 5 | 2 | 4 | 2 | 1 | 5 |
| 5 | 5 | 3 | 3 | 4 | 2 | 3 | 1 | 3 |
| 4 | 5 | 5 | 5 | 3 | 5 | 1 | 1 | 5 |
| 3 | 4 | 4 | 4 | 1 | 3 | 1 | 1 | 5 |
| 2 | 3 | 2 | 2 | 4 | 1 | 1 | 1 | 3 |
| 4 | 4 | 4 | 4 | 3 | 4 | 4 | 2 | 4 |
| 4 | 4 | 4 | 3 | 2 | 4 | 2 | 2 | 4 |
| 4 | 4 | 4 | 4 | 4 | 4 | 2 | 2 | 4 |
| 2 | 2 | 2 | 2 | 4 | 3 | 2 | 2 | 3 |
| 5 | 4 | 4 | 4 | 4 | 4 | 2 | 2 | 4 |
| 5 | 5 | 5 | 5 | 1 | 3 | 1 | 1 | 4 |
| 5 | 4 | 3 | 4 | 2 | 2 | 2 | 2 | 2 |
| 5 | 5 | 5 | 5 | 3 | 3 | 2 | 1 | 5 |
| 5 | 5 | 5 | 5 | 1 | 1 | 1 | 1 | 5 |
| 1 | 1 | 4 | 3 | 3 | 3 | 4 | 3 | 3 |
| 4 | 4 | 4 | 4 | 5 | 3 | 3 | 3 | 3 |
| 5 | 5 | 3 | 4 | 3 | 2 | 3 | 3 | 3 |
| 4 | 5 | 4 | 4 | 5 | 5 | 5 | 4 | 5 |
| 3 | 3 | 3 | 3 | 3 | 3 | 3 | 3 | 3 |
| 3 | 4 | 3 | 3 | 4 | 3 | 4 | 3 | 4 |
| 5 | 4 | 2 | 4 | 4 | 3 | 2 | 1 | 4 |
| 4 | 4 | 4 | 4 | 3 | 4 | 2 | 2 | 4 |
| 2 | 1 | 1 | 1 | 5 | 4 | 5 | 5 | 3 |
| 4 | 4 | 4 | 4 | 2 | 3 | 2 | 2 | 4 |
| 4 | 4 | 3 | 3 | 4 | 1 | 4 | 2 | 2 |
| 5 | 5 | 5 | 5 | 1 | 5 | 5 | 5 | 5 |
| 4 | 4 | 4 | 4 | 4 | 4 | 2 | 2 | 4 |
| 4 | 5 | 5 | 5 | 3 | 2 | 2 | 2 | 4 |
| 5 | 5 | 5 | 5 | 1 | 4 | 1 | 1 | 4 |
| 5 | 4 | 4 | 2 | 2 | 3 | 2 | 1 | 4 |
| 4 | 4 | 4 | 4 | 2 | 4 | 4 | 4 | 4 |
| 3 | 5 | 5 | 5 | 1 | 3 | 1 | 1 | 5 |
| 4 | 4 | 4 | 4 | 2 | 3 | 2 | 2 | 4 |
| 5 | 5 | 5 | 5 | 5 | 5 | 5 | 5 | 5 |
| 3 | 3 | 3 | 3 | 3 | 3 | 3 | 3 | 3 |
| 4 | 5 | 4 | 3 | 2 | 3 | 2 | 2 | 4 |
| 3 | 3 | 3 | 3 | 3 | 3 | 3 | 3 | 3 |
| 5 | 5 | 5 | 5 | 2 | 4 | 1 | 1 | 4 |
| 3 | 3 | 3 | 3 | 3 | 3 | 3 | 3 | 3 |
| 5 | 3 | 5 | 5 | 5 | 5 | 3 | 1 | 1 |
| 3 | 3 | 3 | 3 | 3 | 3 | 3 | 3 | 3 |
| 4 | 4 | 3 | 3 | 4 | 3 | 3 | 3 | 4 |
| 5 | 5 | 4 | 3 | 3 | 3 | 3 | 3 | 3 |
| 3 | 3 | 3 | 3 | 3 | 5 | 3 | 3 | 3 |
| 4 | 3 | 2 | 3 | 3 | 4 | 2 | 2 | 3 |
| 4 | 4 | 4 | 4 | 2 | 4 | 2 | 2 | 4 |
| 5 | 5 | 5 | 5 | 1 | 5 | 1 | 1 | 4 |

|   |   |   |   |   |   |   |   |   |
|---|---|---|---|---|---|---|---|---|
| 5 | 5 | 5 | 5 | 5 | 5 | 1 | 1 | 5 |
| 5 | 5 | 5 | 5 | 2 | 5 | 1 | 1 | 5 |
| 5 | 5 | 5 | 5 | 2 | 2 | 2 | 2 | 3 |
| 4 | 4 | 4 | 4 | 2 | 4 | 2 | 1 | 3 |
| 3 | 2 | 3 | 3 | 4 | 3 | 4 | 3 | 5 |
| 5 | 5 | 3 | 5 | 4 | 5 | 1 | 1 | 5 |
| 5 | 4 | 3 | 4 | 5 | 3 | 3 | 2 | 4 |
| 5 | 5 | 5 | 5 | 4 | 5 | 1 | 1 | 5 |
| 5 | 5 | 5 | 5 | 5 | 5 | 5 | 5 | 5 |
| 5 | 5 | 5 | 4 | 1 | 5 | 1 | 1 | 4 |
| 4 | 4 | 4 | 3 | 4 | 3 | 2 | 2 | 4 |
| 4 | 4 | 3 | 2 | 2 | 2 | 3 | 4 | 5 |
| 5 | 5 | 5 | 5 | 5 | 1 | 1 | 1 | 5 |
| 3 | 3 | 3 | 3 | 3 | 3 | 3 | 3 | 3 |
| 4 | 4 | 4 | 4 | 4 | 4 | 2 | 2 | 4 |
| 3 | 3 | 3 | 1 | 1 | 1 | 1 | 1 | 1 |
| 5 | 5 | 5 | 3 | 1 | 3 | 2 | 2 | 3 |
| 3 | 4 | 4 | 4 | 2 | 5 | 5 | 5 | 5 |
| 2 | 1 | 1 | 3 | 4 | 3 | 3 | 3 | 3 |
| 3 | 4 | 4 | 3 | 2 | 3 | 1 | 1 | 4 |
| 4 | 3 | 3 | 2 | 2 | 4 | 3 | 2 | 3 |
| 5 | 4 | 4 | 4 | 2 | 4 | 2 | 2 | 4 |
| 5 | 5 | 5 | 5 | 5 | 1 | 1 | 1 | 5 |
| 5 | 5 | 5 | 5 | 1 | 5 | 1 | 1 | 4 |
| 3 | 3 | 3 | 3 | 3 | 3 | 5 | 4 | 3 |
| 5 | 5 | 5 | 5 | 2 | 3 | 3 | 3 | 4 |
| 5 | 5 | 5 | 5 | 1 | 4 | 1 | 1 | 5 |
| 5 | 2 | 2 | 2 | 5 | 3 | 4 | 3 | 4 |
| 4 | 4 | 3 | 4 | 4 | 4 | 4 | 2 | 4 |
| 4 | 4 | 4 | 3 | 2 | 2 | 2 | 3 | 4 |
| 3 | 3 | 3 | 3 | 3 | 3 | 3 | 3 | 3 |
| 5 | 5 | 5 | 5 | 1 | 5 | 1 | 1 | 5 |
| 4 | 4 | 4 | 4 | 4 | 4 | 2 | 2 | 4 |
| 5 | 5 | 5 | 5 | 1 | 5 | 1 | 1 | 5 |
| 4 | 4 | 4 | 4 | 4 | 4 | 4 | 4 | 4 |
| 4 | 2 | 2 | 2 | 4 | 3 | 4 | 3 | 3 |
| 4 | 3 | 3 | 3 | 3 | 3 | 3 | 3 | 3 |
| 5 | 5 | 5 | 5 | 1 | 5 | 1 | 1 | 5 |
| 4 | 4 | 2 | 4 | 4 | 4 | 2 | 2 | 4 |
| 4 | 5 | 5 | 5 | 2 | 3 | 1 | 1 | 5 |
| 4 | 4 | 4 | 4 | 2 | 3 | 3 | 2 | 4 |
| 5 | 5 | 5 | 5 | 1 | 5 | 1 | 1 | 5 |
| 5 | 5 | 5 | 5 | 5 | 5 | 1 | 1 | 5 |
| 5 | 5 | 5 | 5 | 2 | 5 | 1 | 1 | 5 |
| 3 | 3 | 3 | 3 | 3 | 3 | 3 | 3 | 3 |
| 4 | 4 | 4 | 3 | 4 | 3 | 2 | 2 | 4 |
| 5 | 5 | 4 | 4 | 4 | 3 | 3 | 1 | 1 |
| 5 | 3 | 5 | 5 | 5 | 3 | 1 | 2 | 2 |
| 4 | 3 | 3 | 3 | 4 | 4 | 3 | 2 | 2 |
| 5 | 5 | 5 | 5 | 1 | 1 | 1 | 1 | 5 |
| 3 | 3 | 3 | 3 | 3 | 3 | 2 | 3 | 4 |
| 5 | 5 | 4 | 4 | 2 | 3 | 1 | 2 | 5 |
| 5 | 5 | 5 | 5 | 1 | 1 | 1 | 1 | 5 |
| 5 | 4 | 5 | 3 | 3 | 4 | 2 | 2 | 4 |

|   |   |   |   |   |   |   |   |   |
|---|---|---|---|---|---|---|---|---|
| 3 | 3 | 3 | 3 | 3 | 3 | 3 | 3 | 3 |
| 4 | 4 | 3 | 3 | 2 | 4 | 1 | 1 | 3 |
| 5 | 4 | 4 | 4 | 2 | 3 | 2 | 1 | 4 |
| 3 | 3 | 3 | 3 | 3 | 3 | 3 | 3 | 3 |
| 5 | 5 | 5 | 5 | 5 | 5 | 5 | 5 | 5 |
| 5 | 5 | 5 | 5 | 2 | 1 | 1 | 2 | 4 |
| 3 | 3 | 3 | 1 | 5 | 3 | 3 | 5 | 1 |
| 3 | 3 | 4 | 2 | 2 | 2 | 4 | 2 | 2 |
| 4 | 4 | 4 | 4 | 2 | 4 | 2 | 2 | 5 |
| 4 | 4 | 4 | 5 | 1 | 1 | 5 | 1 | 5 |
| 5 | 5 | 5 | 5 | 1 | 5 | 1 | 1 | 5 |
| 4 | 4 | 3 | 4 | 4 | 4 | 4 | 2 | 4 |
| 5 | 5 | 5 | 5 | 1 | 5 | 1 | 1 | 5 |
| 5 | 4 | 4 | 4 | 4 | 4 | 4 | 4 | 4 |
| 5 | 4 | 4 | 5 | 3 | 2 | 1 | 1 | 4 |
| 5 | 2 | 5 | 5 | 4 | 5 | 5 | 2 | 1 |
| 5 | 4 | 3 | 4 | 3 | 2 | 1 | 1 | 3 |
| 5 | 5 | 5 | 5 | 1 | 5 | 1 | 1 | 5 |
| 4 | 4 | 3 | 3 | 4 | 5 | 3 | 2 | 4 |
| 3 | 3 | 3 | 3 | 3 | 3 | 3 | 3 | 3 |
| 4 | 4 | 4 | 4 | 4 | 3 | 2 | 1 | 3 |
| 3 | 3 | 3 | 3 | 3 | 3 | 3 | 3 | 3 |
| 5 | 2 | 5 | 2 | 4 | 2 | 5 | 5 | 5 |
| 5 | 5 | 5 | 5 | 1 | 5 | 1 | 1 | 5 |
| 4 | 3 | 4 | 4 | 4 | 4 | 3 | 3 | 3 |
| 5 | 4 | 4 | 5 | 2 | 3 | 3 | 3 | 3 |
| 2 | 1 | 5 | 3 | 2 | 2 | 4 | 1 | 2 |
| 5 | 3 | 2 | 3 | 3 | 4 | 3 | 3 | 3 |
| 3 | 4 | 4 | 4 | 2 | 2 | 2 | 2 | 4 |
| 4 | 3 | 3 | 4 | 4 | 4 | 4 | 3 | 4 |
| 4 | 4 | 4 | 4 | 2 | 3 | 3 | 2 | 4 |
| 3 | 3 | 3 | 3 | 3 | 3 | 3 | 3 | 3 |
| 4 | 4 | 4 | 4 | 4 | 4 | 2 | 4 | 4 |
| 3 | 3 | 3 | 3 | 4 | 4 | 3 | 3 | 3 |
| 3 | 3 | 3 | 3 | 3 | 3 | 3 | 3 | 3 |
| 4 | 4 | 4 | 4 | 2 | 4 | 2 | 2 | 4 |
| 4 | 3 | 3 | 3 | 4 | 5 | 3 | 2 | 2 |
| 5 | 5 | 4 | 4 | 3 | 3 | 3 | 1 | 3 |
| 3 | 3 | 3 | 3 | 3 | 3 | 3 | 3 | 3 |
| 3 | 3 | 3 | 3 | 3 | 3 | 3 | 3 | 3 |
| 5 | 2 | 2 | 3 | 5 | 5 | 5 | 5 | 2 |
| 4 | 4 | 3 | 4 | 3 | 3 | 2 | 2 | 4 |
| 5 | 5 | 5 | 5 | 2 | 4 | 2 | 1 | 4 |
| 4 | 3 | 3 | 3 | 5 | 5 | 3 | 2 | 2 |
| 4 | 3 | 3 | 2 | 4 | 4 | 4 | 3 | 3 |
| 5 | 5 | 5 | 5 | 1 | 5 | 1 | 1 | 5 |
| 4 | 2 | 2 | 3 | 4 | 4 | 4 | 2 | 3 |
| 4 | 4 | 4 | 4 | 2 | 4 | 2 | 2 | 4 |
| 4 | 4 | 4 | 4 | 3 | 4 | 3 | 2 | 4 |
| 5 | 3 | 3 | 4 | 4 | 4 | 3 | 1 | 3 |
| 5 | 5 | 4 | 4 | 2 | 4 | 2 | 2 | 4 |
| 4 | 4 | 4 | 4 | 2 | 2 | 2 | 2 | 4 |
| 3 | 3 | 3 | 3 | 3 | 3 | 3 | 3 | 3 |
| 4 | 3 | 3 | 4 | 4 | 4 | 3 | 2 | 3 |

|   |   |   |   |   |   |   |   |   |
|---|---|---|---|---|---|---|---|---|
| 5 | 4 | 3 | 3 | 4 | 4 | 3 | 2 | 4 |
| 4 | 3 | 3 | 3 | 4 | 4 | 3 | 2 | 3 |
| 4 | 4 | 4 | 3 | 4 | 3 | 4 | 3 | 3 |
| 4 | 4 | 4 | 4 | 2 | 4 | 2 | 2 | 4 |
| 4 | 2 | 2 | 2 | 4 | 3 | 4 | 4 | 3 |
| 3 | 3 | 3 | 5 | 5 | 1 | 3 | 1 | 5 |
| 4 | 4 | 2 | 2 | 4 | 4 | 4 | 2 | 4 |
| 3 | 3 | 3 | 3 | 3 | 3 | 3 | 3 | 3 |
| 5 | 5 | 4 | 5 | 3 | 5 | 1 | 1 | 4 |
| 5 | 5 | 5 | 5 | 2 | 4 | 2 | 2 | 5 |
| 4 | 4 | 4 | 4 | 2 | 4 | 2 | 2 | 4 |
| 1 | 1 | 1 | 1 | 4 | 1 | 1 | 1 | 1 |
| 3 | 3 | 3 | 3 | 2 | 2 | 2 | 2 | 4 |
| 4 | 2 | 3 | 3 | 4 | 3 | 3 | 3 | 4 |
| 5 | 5 | 5 | 4 | 1 | 4 | 1 | 1 | 4 |
| 5 | 3 | 2 | 4 | 2 | 3 | 2 | 3 | 3 |
| 4 | 4 | 4 | 4 | 2 | 3 | 2 | 2 | 4 |
| 4 | 3 | 4 | 2 | 3 | 3 | 2 | 4 | 4 |
| 4 | 4 | 3 | 4 | 4 | 2 | 2 | 2 | 4 |
| 1 | 2 | 1 | 2 | 5 | 1 | 4 | 4 | 2 |
| 1 | 5 | 5 | 5 | 5 | 5 | 5 | 5 | 5 |
| 3 | 3 | 3 | 3 | 3 | 3 | 3 | 2 | 3 |
| 4 | 3 | 4 | 3 | 4 | 4 | 3 | 2 | 4 |
| 4 | 4 | 3 | 4 | 4 | 4 | 2 | 2 | 4 |
| 4 | 4 | 4 | 4 | 4 | 4 | 3 | 3 | 4 |
| 5 | 5 | 3 | 3 | 3 | 3 | 3 | 2 | 3 |
| 3 | 3 | 3 | 3 | 3 | 3 | 3 | 3 | 3 |
| 5 | 5 | 1 | 2 | 5 | 5 | 5 | 2 | 1 |
| 4 | 2 | 2 | 2 | 4 | 2 | 3 | 2 | 2 |
| 4 | 4 | 4 | 4 | 2 | 3 | 2 | 2 | 4 |
| 4 | 4 | 3 | 3 | 4 | 3 | 4 | 2 | 4 |
| 4 | 4 | 3 | 4 | 4 | 4 | 2 | 2 | 4 |
| 3 | 3 | 3 | 3 | 3 | 3 | 3 | 3 | 3 |
| 5 | 5 | 5 | 5 | 5 | 5 | 5 | 5 | 5 |
| 4 | 4 | 4 | 2 | 3 | 3 | 2 | 3 | 3 |
| 3 | 3 | 3 | 3 | 1 | 3 | 2 | 2 | 4 |
| 4 | 4 | 4 | 4 | 4 | 4 | 3 | 4 | 4 |
| 4 | 4 | 4 | 4 | 4 | 4 | 4 | 4 | 4 |
| 4 | 3 | 2 | 2 | 2 | 4 | 4 | 2 | 4 |
| 2 | 3 | 3 | 3 | 4 | 2 | 4 | 3 | 2 |
| 5 | 5 | 5 | 5 | 2 | 5 | 1 | 1 | 5 |
| 4 | 4 | 3 | 4 | 4 | 3 | 3 | 2 | 4 |
| 4 | 4 | 4 | 4 | 4 | 4 | 4 | 4 | 4 |
| 4 | 4 | 3 | 4 | 5 | 4 | 3 | 2 | 3 |
| 4 | 4 | 4 | 4 | 4 | 2 | 3 | 2 | 3 |
| 3 | 2 | 3 | 4 | 4 | 3 | 4 | 3 | 2 |
| 4 | 4 | 3 | 4 | 4 | 3 | 2 | 2 | 4 |
| 4 | 3 | 3 | 3 | 4 | 3 | 3 | 2 | 3 |
| 4 | 2 | 2 | 4 | 5 | 5 | 2 | 2 | 4 |
| 4 | 4 | 3 | 4 | 4 | 4 | 3 | 4 | 4 |
| 4 | 4 | 4 | 4 | 2 | 4 | 2 | 2 | 4 |
| 5 | 5 | 4 | 5 | 2 | 5 | 1 | 1 | 4 |
| 3 | 4 | 4 | 4 | 1 | 4 | 1 | 1 | 4 |
| 4 | 4 | 4 | 5 | 3 | 4 | 2 | 1 | 5 |

|   |   |   |   |   |   |   |   |   |
|---|---|---|---|---|---|---|---|---|
| 4 | 3 | 3 | 3 | 4 | 3 | 3 | 2 | 4 |
| 4 | 4 | 4 | 4 | 4 | 3 | 2 | 2 | 3 |
| 4 | 4 | 3 | 3 | 4 | 3 | 3 | 3 | 4 |
| 4 | 4 | 4 | 3 | 3 | 4 | 3 | 3 | 3 |
| 4 | 4 | 4 | 2 | 2 | 2 | 3 | 2 | 4 |
| 4 | 4 | 3 | 4 | 4 | 3 | 2 | 2 | 3 |
| 4 | 2 | 4 | 4 | 1 | 5 | 3 | 1 | 2 |
| 5 | 5 | 5 | 5 | 2 | 2 | 2 | 2 | 5 |
| 5 | 5 | 5 | 5 | 1 | 4 | 1 | 1 | 5 |
| 5 | 5 | 5 | 5 | 2 | 4 | 1 | 1 | 4 |
| 5 | 5 | 5 | 5 | 1 | 5 | 1 | 1 | 4 |
| 5 | 5 | 4 | 5 | 3 | 5 | 1 | 1 | 5 |
| 4 | 4 | 4 | 4 | 3 | 3 | 2 | 2 | 4 |
| 3 | 3 | 3 | 3 | 3 | 3 | 3 | 3 | 3 |
| 5 | 5 | 5 | 5 | 1 | 3 | 1 | 1 | 5 |
| 4 | 4 | 2 | 2 | 4 | 2 | 2 | 2 | 4 |
| 5 | 5 | 4 | 5 | 1 | 3 | 1 | 1 | 5 |
| 4 | 4 | 4 | 4 | 4 | 3 | 4 | 3 | 2 |
| 5 | 3 | 3 | 3 | 4 | 5 | 3 | 2 | 3 |
| 3 | 4 | 1 | 3 | 4 | 5 | 4 | 4 | 2 |
| 5 | 5 | 4 | 4 | 3 | 4 | 2 | 1 | 4 |
| 5 | 3 | 3 | 5 | 3 | 3 | 3 | 1 | 3 |
| 5 | 5 | 5 | 5 | 1 | 5 | 1 | 1 | 5 |
| 5 | 5 | 5 | 5 | 1 | 3 | 1 | 1 | 5 |
| 5 | 5 | 5 | 5 | 1 | 5 | 1 | 1 | 5 |
| 4 | 3 | 3 | 2 | 4 | 4 | 4 | 3 | 2 |
| 4 | 4 | 3 | 4 | 2 | 4 | 2 | 2 | 4 |
| 5 | 5 | 5 | 5 | 4 | 5 | 1 | 1 | 5 |
| 4 | 4 | 4 | 4 | 5 | 3 | 3 | 2 | 3 |
| 5 | 5 | 5 | 5 | 1 | 5 | 1 | 1 | 5 |
| 5 | 4 | 2 | 3 | 3 | 1 | 1 | 1 | 4 |
| 5 | 4 | 2 | 4 | 4 | 2 | 2 | 1 | 4 |
| 3 | 3 | 3 | 4 | 4 | 4 | 4 | 4 | 4 |
| 5 | 5 | 5 | 5 | 1 | 4 | 1 | 1 | 5 |
| 5 | 5 | 3 | 3 | 4 | 5 | 2 | 1 | 3 |
| 5 | 5 | 5 | 5 | 2 | 4 | 2 | 1 | 4 |
| 4 | 4 | 4 | 3 | 3 | 4 | 3 | 2 | 4 |
| 1 | 1 | 1 | 1 | 5 | 1 | 5 | 5 | 1 |
| 3 | 1 | 1 | 3 | 3 | 3 | 3 | 3 | 3 |
| 5 | 4 | 4 | 4 | 2 | 4 | 1 | 1 | 4 |
| 5 | 5 | 5 | 5 | 1 | 3 | 2 | 1 | 5 |
| 3 | 3 | 3 | 3 | 4 | 4 | 4 | 3 | 4 |
| 3 | 3 | 3 | 3 | 3 | 3 | 3 | 3 | 3 |
| 4 | 3 | 3 | 4 | 3 | 3 | 2 | 1 | 4 |
| 4 | 2 | 2 | 3 | 4 | 2 | 4 | 2 | 3 |
| 5 | 4 | 2 | 3 | 4 | 4 | 3 | 2 | 2 |
| 5 | 5 | 4 | 4 | 4 | 3 | 2 | 2 | 2 |
| 4 | 3 | 3 | 3 | 3 | 4 | 4 | 3 | 3 |
| 5 | 4 | 4 | 4 | 2 | 4 | 2 | 2 | 4 |
| 5 | 3 | 2 | 4 | 4 | 4 | 4 | 2 | 3 |
| 4 | 5 | 5 | 5 | 2 | 5 | 2 | 2 | 3 |
| 5 | 5 | 5 | 5 | 1 | 3 | 1 | 1 | 5 |
| 3 | 3 | 2 | 2 | 4 | 1 | 2 | 1 | 3 |
| 5 | 5 | 5 | 5 | 3 | 4 | 1 | 1 | 4 |

|   |   |   |   |   |   |   |   |   |
|---|---|---|---|---|---|---|---|---|
| 4 | 4 | 3 | 3 | 4 | 4 | 4 | 2 | 4 |
| 4 | 4 | 3 | 5 | 4 | 5 | 1 | 1 | 3 |
| 3 | 3 | 3 | 4 | 2 | 3 | 3 | 1 | 4 |
| 1 | 1 | 1 | 1 | 5 | 1 | 5 | 5 | 1 |
| 3 | 3 | 3 | 3 | 4 | 3 | 3 | 2 | 3 |
| 2 | 2 | 2 | 2 | 4 | 2 | 4 | 3 | 2 |
| 5 | 4 | 4 | 3 | 4 | 3 | 2 | 3 | 3 |
| 5 | 3 | 3 | 3 | 4 | 2 | 4 | 2 | 4 |
| 5 | 5 | 5 | 4 | 3 | 4 | 2 | 2 | 5 |
| 4 | 3 | 2 | 3 | 4 | 3 | 4 | 3 | 2 |
| 4 | 4 | 4 | 4 | 2 | 3 | 2 | 2 | 4 |
| 4 | 3 | 3 | 3 | 4 | 3 | 4 | 2 | 3 |
| 5 | 3 | 3 | 3 | 4 | 3 | 2 | 2 | 3 |
| 5 | 5 | 5 | 5 | 1 | 5 | 1 | 1 | 5 |
| 5 | 5 | 5 | 5 | 1 | 4 | 1 | 1 | 5 |
| 3 | 4 | 3 | 3 | 3 | 3 | 3 | 3 | 3 |
| 5 | 5 | 3 | 4 | 4 | 4 | 2 | 2 | 4 |
| 5 | 5 | 5 | 5 | 1 | 4 | 2 | 1 | 5 |
| 3 | 2 | 2 | 2 | 2 | 2 | 2 | 3 | 3 |
| 4 | 2 | 2 | 2 | 4 | 4 | 2 | 2 | 3 |
| 4 | 4 | 4 | 3 | 4 | 4 | 4 | 2 | 3 |
| 2 | 2 | 2 | 2 | 4 | 3 | 4 | 2 | 3 |
| 5 | 5 | 5 | 5 | 5 | 5 | 5 | 5 | 5 |
| 5 | 5 | 5 | 5 | 5 | 5 | 5 | 3 | 3 |
| 5 | 4 | 2 | 3 | 4 | 5 | 3 | 2 | 4 |
| 2 | 3 | 3 | 3 | 4 | 3 | 3 | 3 | 3 |
| 3 | 3 | 3 | 3 | 3 | 3 | 3 | 3 | 3 |
| 5 | 5 | 5 | 5 | 1 | 1 | 1 | 1 | 4 |
| 3 | 3 | 3 | 3 | 3 | 3 | 3 | 3 | 3 |
| 4 | 4 | 4 | 4 | 3 | 3 | 3 | 3 | 3 |
| 3 | 4 | 3 | 3 | 3 | 3 | 3 | 3 | 3 |
| 5 | 2 | 3 | 3 | 4 | 3 | 3 | 3 | 2 |
| 5 | 3 | 3 | 2 | 3 | 3 | 3 | 3 | 4 |
| 3 | 4 | 3 | 3 | 2 | 3 | 3 | 2 | 3 |
| 3 | 3 | 4 | 3 | 4 | 4 | 3 | 3 | 4 |
| 4 | 4 | 4 | 4 | 2 | 3 | 2 | 2 | 4 |
| 5 | 5 | 5 | 5 | 4 | 4 | 2 | 1 | 5 |
| 4 | 4 | 3 | 3 | 2 | 3 | 2 | 2 | 3 |
| 3 | 3 | 3 | 3 | 3 | 3 | 3 | 3 | 3 |
| 3 | 3 | 3 | 3 | 3 | 3 | 3 | 3 | 3 |
| 4 | 4 | 4 | 4 | 4 | 3 | 2 | 2 | 4 |
| 5 | 5 | 5 | 5 | 2 | 1 | 3 | 1 | 5 |
| 4 | 4 | 4 | 3 | 4 | 3 | 3 | 2 | 3 |
| 5 | 5 | 5 | 4 | 3 | 2 | 2 | 2 | 2 |
| 3 | 3 | 3 | 3 | 3 | 3 | 3 | 3 | 3 |
| 5 | 2 | 2 | 2 | 5 | 2 | 2 | 3 | 4 |
| 5 | 5 | 5 | 5 | 2 | 4 | 1 | 1 | 5 |
| 5 | 4 | 3 | 4 | 1 | 4 | 2 | 1 | 3 |
| 5 | 5 | 5 | 4 | 4 | 2 | 1 | 1 | 5 |
| 4 | 4 | 3 | 4 | 1 | 3 | 2 | 1 | 4 |
| 5 | 5 | 4 | 4 | 3 | 1 | 3 | 2 | 4 |
| 4 | 4 | 3 | 4 | 3 | 3 | 2 | 2 | 4 |
| 4 | 4 | 4 | 5 | 5 | 3 | 1 | 1 | 5 |
| 5 | 4 | 2 | 4 | 4 | 4 | 2 | 1 | 3 |

|   |   |   |   |   |   |   |   |   |
|---|---|---|---|---|---|---|---|---|
| 4 | 4 | 3 | 4 | 3 | 4 | 2 | 2 | 4 |
| 4 | 4 | 4 | 4 | 3 | 4 | 2 | 2 | 4 |
| 4 | 4 | 3 | 3 | 4 | 4 | 3 | 2 | 4 |
| 5 | 5 | 5 | 5 | 2 | 5 | 2 | 1 | 5 |
| 5 | 5 | 5 | 5 | 2 | 4 | 2 | 2 | 5 |
| 5 | 4 | 2 | 4 | 4 | 4 | 2 | 1 | 3 |



| C60 | C61 | C62 | C63 | C64 | C65 | C66 | C67 | C68 |   |
|-----|-----|-----|-----|-----|-----|-----|-----|-----|---|
| 5   | 5   | 5   | 5   | 5   | 5   | 5   | 5   | 3   | 4 |
| 1   | 4   | 2   | 1   | 3   | 2   | 5   | 5   | 5   | 2 |
| 5   | 5   | 5   | 5   | 5   | 5   | 5   | 5   | 5   | 5 |
| 5   | 5   | 5   | 5   | 5   | 5   | 5   | 5   | 5   | 5 |
| 3   | 3   | 3   | 3   | 3   | 3   | 3   | 3   | 3   | 3 |
| 5   | 5   | 5   | 5   | 4   | 4   | 5   | 5   | 5   | 4 |
| 5   | 5   | 5   | 5   | 5   | 5   | 5   | 5   | 5   | 5 |
| 3   | 4   | 3   | 2   | 4   | 4   | 1   | 3   | 3   | 3 |
| 1   | 1   | 1   | 1   | 1   | 1   | 1   | 5   | 5   | 5 |
| 5   | 5   | 5   | 5   | 5   | 4   | 5   | 5   | 4   | 4 |
| 3   | 4   | 2   | 2   | 4   | 4   | 2   | 5   | 5   | 5 |
| 2   | 4   | 2   | 2   | 2   | 2   | 2   | 2   | 2   | 3 |
| 5   | 5   | 1   | 1   | 5   | 5   | 1   | 5   | 5   | 5 |
| 5   | 5   | 5   | 5   | 5   | 5   | 5   | 5   | 5   | 5 |
| 2   | 2   | 5   | 5   | 3   | 5   | 5   | 5   | 5   | 5 |
| 5   | 5   | 5   | 5   | 5   | 5   | 5   | 5   | 5   | 5 |
| 2   | 4   | 3   | 1   | 2   | 4   | 2   | 3   | 4   | 4 |
| 5   | 5   | 5   | 5   | 5   | 5   | 5   | 5   | 5   | 5 |
| 3   | 4   | 4   | 4   | 4   | 3   | 3   | 3   | 3   | 3 |
| 2   | 5   | 2   | 2   | 2   | 5   | 4   | 2   | 5   | 5 |
| 5   | 5   | 5   | 5   | 5   | 3   | 2   | 3   | 4   | 4 |
| 5   | 5   | 5   | 5   | 5   | 5   | 5   | 5   | 4   | 4 |
| 5   | 4   | 4   | 1   | 4   | 4   | 1   | 4   | 5   | 5 |
| 4   | 5   | 1   | 1   | 4   | 4   | 1   | 4   | 4   | 4 |
| 2   | 2   | 3   | 2   | 2   | 2   | 4   | 2   | 2   | 2 |
| 2   | 3   | 2   | 2   | 3   | 3   | 2   | 3   | 4   | 4 |
| 1   | 1   | 3   | 3   | 3   | 5   | 3   | 3   | 3   | 3 |
| 3   | 4   | 2   | 2   | 3   | 3   | 2   | 4   | 4   | 4 |
| 3   | 2   | 2   | 1   | 1   | 1   | 1   | 2   | 4   | 4 |
| 3   | 3   | 2   | 2   | 3   | 3   | 2   | 3   | 3   | 3 |
| 5   | 5   | 3   | 1   | 5   | 5   | 1   | 3   | 5   | 5 |
| 5   | 5   | 1   | 1   | 5   | 5   | 1   | 5   | 5   | 5 |
| 3   | 4   | 2   | 2   | 4   | 3   | 2   | 3   | 5   | 5 |
| 5   | 5   | 5   | 5   | 4   | 3   | 4   | 5   | 4   | 4 |
| 2   | 5   | 3   | 2   | 4   | 4   | 1   | 2   | 3   | 3 |
| 3   | 3   | 3   | 3   | 3   | 3   | 3   | 3   | 3   | 3 |
| 5   | 4   | 2   | 1   | 5   | 4   | 1   | 5   | 5   | 5 |
| 5   | 5   | 5   | 5   | 5   | 5   | 5   | 5   | 5   | 5 |
| 5   | 5   | 1   | 1   | 5   | 5   | 1   | 5   | 5   | 5 |
| 5   | 5   | 1   | 1   | 5   | 5   | 1   | 5   | 5   | 5 |
| 4   | 4   | 1   | 1   | 4   | 4   | 1   | 4   | 4   | 4 |
| 4   | 4   | 2   | 2   | 4   | 4   | 2   | 3   | 4   | 4 |
| 5   | 5   | 2   | 1   | 5   | 5   | 2   | 3   | 5   | 5 |
| 3   | 4   | 2   | 1   | 3   | 4   | 1   | 3   | 3   | 3 |
| 3   | 4   | 3   | 3   | 3   | 4   | 2   | 4   | 3   | 3 |
| 4   | 4   | 4   | 4   | 4   | 4   | 4   | 4   | 4   | 4 |
| 4   | 4   | 4   | 4   | 4   | 4   | 4   | 4   | 4   | 4 |
| 5   | 5   | 5   | 5   | 5   | 4   | 4   | 4   | 4   | 4 |
| 3   | 2   | 2   | 2   | 2   | 2   | 2   | 2   | 2   | 2 |
| 4   | 4   | 1   | 1   | 1   | 1   | 1   | 1   | 1   | 1 |
| 1   | 5   | 2   | 3   | 3   | 2   | 3   | 3   | 3   | 3 |
| 5   | 4   | 2   | 1   | 3   | 5   | 1   | 5   | 5   | 5 |
| 5   | 4   | 3   | 1   | 4   | 4   | 2   | 4   | 5   | 5 |

|   |   |   |   |   |   |   |   |   |
|---|---|---|---|---|---|---|---|---|
| 3 | 3 | 3 | 3 | 3 | 3 | 3 | 3 | 3 |
| 3 | 4 | 3 | 2 | 3 | 4 | 2 | 3 | 4 |
| 3 | 3 | 5 | 4 | 4 | 5 | 4 | 3 | 4 |
| 5 | 5 | 5 | 5 | 5 | 5 | 5 | 5 | 5 |
| 5 | 5 | 3 | 5 | 2 | 2 | 4 | 3 | 5 |
| 3 | 5 | 2 | 1 | 1 | 4 | 1 | 3 | 5 |
| 5 | 5 | 1 | 1 | 5 | 5 | 1 | 5 | 5 |
| 5 | 5 | 5 | 5 | 5 | 5 | 5 | 5 | 5 |
| 2 | 4 | 2 | 2 | 4 | 4 | 2 | 4 | 4 |
| 3 | 3 | 4 | 2 | 2 | 3 | 2 | 4 | 4 |
| 3 | 4 | 2 | 2 | 3 | 4 | 2 | 3 | 4 |
| 4 | 4 | 5 | 1 | 4 | 4 | 2 | 3 | 4 |
| 5 | 5 | 3 | 1 | 5 | 5 | 5 | 3 | 5 |
| 2 | 2 | 5 | 1 | 4 | 5 | 4 | 3 | 5 |
| 4 | 4 | 2 | 2 | 4 | 4 | 2 | 4 | 4 |
| 3 | 3 | 1 | 1 | 3 | 4 | 2 | 3 | 5 |
| 5 | 5 | 3 | 1 | 5 | 1 | 1 | 1 | 5 |
| 3 | 3 | 3 | 3 | 3 | 3 | 3 | 3 | 4 |
| 3 | 4 | 4 | 2 | 4 | 4 | 2 | 4 | 4 |
| 3 | 3 | 3 | 2 | 2 | 3 | 2 | 3 | 3 |
| 3 | 4 | 2 | 2 | 4 | 4 | 2 | 3 | 4 |
| 4 | 3 | 2 | 1 | 4 | 4 | 1 | 4 | 4 |
| 3 | 3 | 3 | 3 | 3 | 3 | 3 | 3 | 3 |
| 3 | 4 | 4 | 3 | 3 | 3 | 3 | 3 | 3 |
| 3 | 3 | 3 | 3 | 3 | 3 | 3 | 3 | 3 |
| 3 | 3 | 3 | 3 | 3 | 3 | 3 | 3 | 3 |
| 1 | 1 | 4 | 2 | 2 | 2 | 3 | 2 | 2 |
| 3 | 4 | 2 | 1 | 4 | 3 | 2 | 3 | 4 |
| 3 | 3 | 3 | 3 | 3 | 3 | 3 | 3 | 3 |
| 3 | 3 | 3 | 2 | 3 | 3 | 3 | 3 | 3 |
| 2 | 3 | 4 | 3 | 3 | 3 | 3 | 3 | 3 |
| 2 | 3 | 3 | 3 | 1 | 3 | 3 | 3 | 2 |
| 3 | 3 | 4 | 2 | 3 | 3 | 2 | 4 | 3 |
| 4 | 5 | 2 | 1 | 5 | 5 | 1 | 5 | 5 |
| 2 | 2 | 3 | 3 | 2 | 2 | 3 | 2 | 2 |
| 5 | 5 | 2 | 5 | 5 | 5 | 5 | 5 | 5 |
| 5 | 5 | 4 | 1 | 5 | 5 | 1 | 4 | 5 |
| 5 | 5 | 1 | 1 | 5 | 5 | 1 | 5 | 5 |
| 2 | 2 | 3 | 1 | 3 | 2 | 2 | 4 | 4 |
| 3 | 3 | 3 | 3 | 3 | 3 | 3 | 3 | 4 |
| 4 | 4 | 4 | 1 | 4 | 3 | 1 | 3 | 4 |
| 3 | 2 | 4 | 3 | 3 | 3 | 4 | 2 | 4 |
| 3 | 4 | 2 | 2 | 4 | 4 | 2 | 4 | 4 |
| 3 | 3 | 4 | 3 | 3 | 3 | 4 | 2 | 3 |
| 5 | 5 | 1 | 1 | 4 | 5 | 1 | 4 | 5 |
| 3 | 3 | 4 | 2 | 2 | 2 | 4 | 4 | 4 |
| 2 | 4 | 4 | 2 | 3 | 4 | 4 | 3 | 3 |
| 5 | 3 | 2 | 4 | 3 | 4 | 4 | 3 | 4 |
| 3 | 3 | 3 | 2 | 2 | 2 | 3 | 3 | 4 |
| 5 | 5 | 2 | 1 | 5 | 5 | 1 | 5 | 5 |
| 1 | 2 | 4 | 2 | 2 | 2 | 2 | 2 | 3 |
| 2 | 4 | 2 | 2 | 2 | 3 | 3 | 2 | 3 |
| 5 | 5 | 1 | 1 | 5 | 5 | 1 | 5 | 5 |
| 2 | 2 | 2 | 2 | 2 | 1 | 2 | 2 | 2 |
| 3 | 3 | 4 | 2 | 3 | 2 | 4 | 1 | 3 |

|   |   |   |   |   |   |   |   |   |
|---|---|---|---|---|---|---|---|---|
| 4 | 2 | 3 | 1 | 1 | 2 | 1 | 4 | 2 |
| 1 | 1 | 3 | 5 | 1 | 1 | 5 | 1 | 2 |
| 5 | 5 | 4 | 1 | 5 | 5 | 1 | 5 | 5 |
| 5 | 5 | 1 | 1 | 5 | 5 | 5 | 1 | 5 |
| 5 | 5 | 1 | 1 | 5 | 5 | 1 | 4 | 5 |
| 2 | 4 | 4 | 1 | 3 | 4 | 4 | 2 | 5 |
| 2 | 4 | 4 | 1 | 3 | 3 | 1 | 3 | 2 |
| 4 | 4 | 2 | 1 | 4 | 4 | 2 | 2 | 4 |
| 5 | 5 | 1 | 1 | 5 | 5 | 1 | 2 | 5 |
| 3 | 3 | 3 | 3 | 3 | 3 | 3 | 3 | 3 |
| 3 | 3 | 3 | 3 | 3 | 3 | 3 | 3 | 3 |
| 4 | 4 | 2 | 2 | 4 | 4 | 1 | 3 | 4 |
| 3 | 4 | 1 | 1 | 3 | 3 | 1 | 3 | 4 |
| 3 | 4 | 2 | 2 | 3 | 4 | 2 | 4 | 4 |
| 4 | 4 | 3 | 2 | 3 | 3 | 2 | 3 | 4 |
| 4 | 4 | 4 | 2 | 4 | 4 | 2 | 4 | 3 |
| 3 | 2 | 3 | 2 | 3 | 4 | 2 | 4 | 4 |
| 2 | 4 | 2 | 2 | 4 | 4 | 2 | 4 | 4 |
| 3 | 1 | 3 | 1 | 3 | 2 | 2 | 3 | 4 |
| 3 | 3 | 3 | 2 | 4 | 4 | 4 | 4 | 4 |
| 3 | 4 | 4 | 2 | 3 | 4 | 2 | 4 | 4 |
| 5 | 5 | 1 | 1 | 5 | 5 | 1 | 5 | 5 |
| 3 | 3 | 3 | 3 | 2 | 3 | 3 | 3 | 4 |
| 3 | 3 | 3 | 3 | 3 | 3 | 3 | 3 | 3 |
| 2 | 4 | 4 | 2 | 2 | 2 | 4 | 2 | 4 |
| 2 | 2 | 4 | 2 | 2 | 3 | 4 | 2 | 4 |
| 2 | 4 | 5 | 2 | 3 | 3 | 3 | 3 | 3 |
| 1 | 2 | 4 | 3 | 1 | 3 | 3 | 2 | 2 |
| 2 | 4 | 3 | 2 | 3 | 3 | 4 | 2 | 4 |
| 5 | 5 | 1 | 1 | 5 | 5 | 1 | 4 | 5 |
| 4 | 4 | 2 | 2 | 4 | 4 | 2 | 3 | 4 |
| 3 | 3 | 2 | 1 | 4 | 4 | 4 | 3 | 4 |
| 3 | 3 | 4 | 3 | 3 | 3 | 4 | 4 | 3 |
| 1 | 1 | 5 | 5 | 1 | 1 | 5 | 1 | 1 |
| 1 | 1 | 1 | 2 | 2 | 2 | 1 | 3 | 3 |
| 4 | 4 | 1 | 1 | 4 | 3 | 2 | 3 | 4 |
| 3 | 4 | 5 | 1 | 5 | 3 | 1 | 5 | 5 |
| 5 | 5 | 4 | 2 | 2 | 4 | 2 | 2 | 4 |
| 2 | 2 | 3 | 1 | 3 | 4 | 1 | 4 | 4 |
| 1 | 1 | 2 | 3 | 4 | 3 | 4 | 3 | 2 |
| 2 | 3 | 2 | 2 | 4 | 4 | 2 | 4 | 5 |
| 1 | 2 | 5 | 2 | 1 | 1 | 4 | 1 | 3 |
| 3 | 3 | 3 | 2 | 3 | 3 | 4 | 2 | 2 |
| 2 | 4 | 4 | 3 | 2 | 1 | 5 | 1 | 3 |
| 1 | 1 | 3 | 1 | 3 | 3 | 3 | 3 | 4 |
| 3 | 4 | 2 | 1 | 3 | 3 | 1 | 3 | 5 |
| 3 | 3 | 3 | 3 | 3 | 3 | 3 | 3 | 3 |
| 3 | 5 | 1 | 1 | 5 | 4 | 1 | 5 | 4 |
| 3 | 5 | 3 | 2 | 3 | 4 | 2 | 2 | 4 |
| 2 | 4 | 4 | 2 | 2 | 4 | 2 | 3 | 4 |
| 3 | 4 | 2 | 1 | 3 | 5 | 1 | 2 | 5 |
| 5 | 5 | 3 | 3 | 3 | 3 | 3 | 3 | 5 |
| 2 | 3 | 4 | 1 | 3 | 3 | 5 | 2 | 4 |
| 4 | 3 | 2 | 2 | 3 | 3 | 2 | 3 | 4 |

|   |   |   |   |   |   |   |   |   |
|---|---|---|---|---|---|---|---|---|
| 3 | 4 | 2 | 1 | 3 | 4 | 1 | 4 | 4 |
| 2 | 2 | 2 | 1 | 2 | 3 | 1 | 2 | 4 |
| 5 | 5 | 1 | 1 | 5 | 5 | 1 | 4 | 5 |
| 2 | 3 | 4 | 2 | 2 | 2 | 3 | 2 | 4 |
| 4 | 3 | 2 | 1 | 2 | 5 | 1 | 3 | 5 |
| 3 | 4 | 2 | 2 | 3 | 4 | 2 | 4 | 4 |
| 3 | 4 | 3 | 2 | 3 | 4 | 2 | 3 | 4 |
| 4 | 4 | 2 | 2 | 4 | 4 | 2 | 4 | 4 |
| 2 | 2 | 4 | 3 | 2 | 2 | 4 | 2 | 2 |
| 2 | 4 | 2 | 1 | 4 | 3 | 1 | 4 | 4 |
| 2 | 5 | 3 | 1 | 3 | 3 | 1 | 2 | 4 |
| 5 | 5 | 1 | 1 | 4 | 5 | 1 | 5 | 5 |
| 3 | 3 | 3 | 3 | 3 | 5 | 1 | 5 | 5 |
| 5 | 4 | 1 | 1 | 5 | 5 | 1 | 5 | 5 |
| 3 | 3 | 3 | 2 | 3 | 3 | 3 | 3 | 3 |
| 3 | 4 | 3 | 1 | 3 | 3 | 1 | 4 | 4 |
| 3 | 4 | 2 | 1 | 4 | 4 | 1 | 4 | 4 |
| 3 | 3 | 2 | 2 | 3 | 3 | 2 | 3 | 4 |
| 4 | 3 | 3 | 3 | 2 | 4 | 2 | 4 | 3 |
| 4 | 5 | 3 | 1 | 5 | 5 | 1 | 5 | 4 |
| 2 | 4 | 4 | 2 | 2 | 5 | 2 | 2 | 5 |
| 5 | 5 | 2 | 1 | 4 | 5 | 1 | 3 | 5 |
| 3 | 5 | 4 | 1 | 2 | 3 | 3 | 2 | 4 |
| 5 | 5 | 2 | 1 | 4 | 1 | 1 | 2 | 1 |
| 1 | 2 | 5 | 3 | 1 | 1 | 1 | 1 | 2 |
| 5 | 1 | 1 | 1 | 3 | 1 | 5 | 5 | 1 |
| 3 | 4 | 2 | 2 | 3 | 3 | 2 | 4 | 4 |
| 3 | 3 | 3 | 3 | 2 | 2 | 3 | 3 | 3 |
| 1 | 1 | 4 | 2 | 1 | 1 | 5 | 1 | 4 |
| 3 | 3 | 3 | 4 | 4 | 5 | 4 | 5 | 5 |
| 3 | 3 | 3 | 3 | 3 | 3 | 3 | 3 | 4 |
| 5 | 5 | 1 | 1 | 5 | 5 | 1 | 1 | 5 |
| 5 | 5 | 1 | 1 | 4 | 3 | 1 | 3 | 5 |
| 4 | 5 | 1 | 1 | 4 | 3 | 3 | 2 | 5 |
| 3 | 4 | 2 | 1 | 3 | 4 | 1 | 4 | 4 |
| 2 | 4 | 2 | 5 | 5 | 3 | 1 | 4 | 3 |
| 3 | 3 | 3 | 3 | 3 | 2 | 3 | 3 | 3 |
| 4 | 5 | 1 | 1 | 5 | 5 | 1 | 5 | 5 |
| 3 | 3 | 2 | 1 | 4 | 3 | 2 | 4 | 4 |
| 5 | 5 | 1 | 2 | 5 | 4 | 1 | 5 | 5 |
| 4 | 4 | 4 | 1 | 4 | 4 | 3 | 3 | 4 |
| 2 | 4 | 2 | 2 | 2 | 2 | 2 | 2 | 4 |
| 2 | 5 | 5 | 5 | 5 | 5 | 5 | 5 | 5 |
| 4 | 4 | 2 | 2 | 4 | 4 | 3 | 2 | 5 |
| 3 | 3 | 3 | 3 | 3 | 3 | 2 | 3 | 4 |
| 3 | 4 | 4 | 2 | 3 | 4 | 2 | 4 | 4 |
| 3 | 3 | 3 | 3 | 3 | 3 | 3 | 3 | 3 |
| 5 | 5 | 1 | 1 | 5 | 5 | 1 | 5 | 5 |
| 5 | 5 | 1 | 1 | 5 | 5 | 1 | 2 | 5 |
| 5 | 5 | 1 | 1 | 5 | 4 | 1 | 5 | 5 |
| 4 | 4 | 4 | 4 | 4 | 4 | 4 | 4 | 4 |
| 3 | 3 | 3 | 3 | 3 | 3 | 3 | 3 | 3 |
| 2 | 4 | 5 | 2 | 2 | 3 | 2 | 2 | 3 |

|   |   |   |   |   |   |   |   |   |
|---|---|---|---|---|---|---|---|---|
| 3 | 3 | 3 | 3 | 3 | 3 | 3 | 3 | 3 |
| 4 | 2 | 1 | 4 | 1 | 2 | 1 | 2 | 2 |
| 4 | 4 | 3 | 1 | 4 | 4 | 1 | 4 | 4 |
| 2 | 2 | 4 | 2 | 3 | 3 | 2 | 3 | 4 |
| 5 | 5 | 2 | 1 | 5 | 5 | 5 | 4 | 3 |
| 5 | 5 | 2 | 2 | 5 | 5 | 2 | 5 | 5 |
| 4 | 5 | 4 | 4 | 4 | 4 | 4 | 4 | 4 |
| 3 | 4 | 1 | 1 | 5 | 1 | 4 | 5 | 5 |
| 2 | 4 | 2 | 2 | 2 | 4 | 2 | 2 | 4 |
| 4 | 4 | 4 | 2 | 4 | 2 | 2 | 2 | 2 |
| 3 | 4 | 3 | 1 | 3 | 4 | 2 | 2 | 3 |
| 5 | 5 | 1 | 1 | 5 | 5 | 1 | 5 | 5 |
| 1 | 1 | 1 | 1 | 1 | 1 | 1 | 1 | 1 |
| 4 | 1 | 2 | 1 | 3 | 3 | 2 | 4 | 4 |
| 3 | 3 | 3 | 3 | 3 | 3 | 3 | 3 | 3 |
| 4 | 4 | 3 | 2 | 5 | 5 | 3 | 4 | 3 |
| 3 | 3 | 3 | 3 | 4 | 3 | 3 | 3 | 3 |
| 2 | 4 | 4 | 4 | 4 | 3 | 3 | 4 | 3 |
| 3 | 2 | 3 | 2 | 3 | 3 | 4 | 4 | 3 |
| 3 | 5 | 4 | 1 | 4 | 4 | 1 | 4 | 5 |
| 4 | 4 | 4 | 2 | 4 | 4 | 2 | 4 | 4 |
| 4 | 4 | 2 | 2 | 4 | 4 | 2 | 2 | 3 |
| 4 | 5 | 1 | 1 | 5 | 5 | 1 | 5 | 5 |
| 3 | 5 | 3 | 1 | 4 | 4 | 1 | 5 | 4 |
| 3 | 3 | 3 | 3 | 3 | 3 | 3 | 3 | 3 |
| 3 | 4 | 3 | 3 | 3 | 3 | 3 | 4 | 3 |
| 3 | 3 | 3 | 2 | 3 | 3 | 3 | 3 | 3 |
| 3 | 3 | 2 | 1 | 3 | 5 | 3 | 5 | 5 |
| 5 | 5 | 4 | 5 | 5 | 5 | 5 | 5 | 5 |
| 2 | 4 | 2 | 1 | 2 | 5 | 1 | 3 | 5 |
| 3 | 3 | 3 | 3 | 3 | 3 | 3 | 3 | 3 |
| 1 | 1 | 5 | 5 | 1 | 1 | 5 | 1 | 2 |
| 3 | 3 | 3 | 3 | 2 | 4 | 4 | 4 | 3 |
| 4 | 4 | 2 | 4 | 4 | 4 | 2 | 4 | 5 |
| 3 | 4 | 2 | 1 | 3 | 3 | 1 | 3 | 4 |
| 3 | 3 | 4 | 1 | 3 | 3 | 1 | 3 | 4 |
| 2 | 4 | 2 | 2 | 3 | 4 | 2 | 3 | 4 |
| 2 | 2 | 2 | 1 | 1 | 4 | 1 | 3 | 4 |
| 4 | 4 | 4 | 4 | 4 | 4 | 4 | 4 | 4 |
| 4 | 5 | 1 | 1 | 4 | 4 | 4 | 4 | 5 |
| 4 | 4 | 2 | 2 | 2 | 4 | 2 | 2 | 4 |
| 3 | 3 | 3 | 1 | 3 | 3 | 3 | 3 | 4 |
| 1 | 4 | 1 | 3 | 1 | 3 | 2 | 3 | 3 |
| 5 | 3 | 3 | 1 | 5 | 5 | 1 | 5 | 5 |
| 5 | 3 | 1 | 1 | 3 | 3 | 3 | 2 | 3 |
| 3 | 3 | 3 | 2 | 3 | 3 | 2 | 3 | 4 |
| 2 | 3 | 2 | 1 | 3 | 3 | 2 | 2 | 3 |
| 2 | 4 | 2 | 3 | 4 | 4 | 2 | 4 | 4 |
| 5 | 5 | 5 | 5 | 5 | 5 | 5 | 5 | 4 |
| 3 | 4 | 3 | 4 | 5 | 3 | 3 | 3 | 4 |
| 4 | 4 | 3 | 3 | 3 | 4 | 3 | 3 | 4 |
| 5 | 4 | 1 | 1 | 5 | 4 | 1 | 4 | 4 |
| 3 | 3 | 3 | 3 | 3 | 3 | 2 | 3 | 3 |
| 3 | 4 | 4 | 2 | 3 | 4 | 2 | 2 | 4 |

|   |   |   |   |   |   |   |   |   |
|---|---|---|---|---|---|---|---|---|
| 5 | 5 | 2 | 1 | 5 | 5 | 1 | 4 | 5 |
| 4 | 4 | 4 | 1 | 4 | 3 | 1 | 4 | 5 |
| 1 | 3 | 2 | 1 | 2 | 3 | 4 | 4 | 4 |
| 3 | 3 | 3 | 3 | 3 | 3 | 3 | 3 | 3 |
| 3 | 2 | 2 | 3 | 1 | 2 | 4 | 5 | 2 |
| 3 | 5 | 1 | 1 | 5 | 5 | 1 | 3 | 5 |
| 5 | 3 | 3 | 1 | 4 | 4 | 1 | 4 | 4 |
| 4 | 4 | 4 | 1 | 3 | 4 | 1 | 3 | 4 |
| 2 | 1 | 1 | 1 | 3 | 1 | 4 | 3 | 5 |
| 1 | 1 | 5 | 3 | 1 | 1 | 3 | 1 | 1 |
| 2 | 4 | 2 | 2 | 3 | 3 | 2 | 4 | 4 |
| 4 | 4 | 5 | 1 | 3 | 3 | 1 | 5 | 5 |
| 2 | 4 | 4 | 2 | 2 | 2 | 4 | 2 | 4 |
| 3 | 3 | 2 | 2 | 4 | 3 | 2 | 3 | 3 |
| 1 | 2 | 2 | 1 | 4 | 3 | 2 | 3 | 4 |
| 5 | 5 | 2 | 2 | 5 | 5 | 2 | 5 | 5 |
| 3 | 3 | 3 | 3 | 3 | 3 | 3 | 3 | 3 |
| 2 | 4 | 4 | 2 | 4 | 4 | 2 | 2 | 5 |
| 5 | 5 | 2 | 1 | 2 | 1 | 1 | 1 | 1 |
| 2 | 2 | 3 | 2 | 3 | 3 | 3 | 3 | 3 |
| 4 | 4 | 3 | 3 | 4 | 4 | 4 | 4 | 4 |
| 4 | 4 | 4 | 2 | 2 | 3 | 2 | 4 | 4 |
| 4 | 5 | 1 | 1 | 5 | 5 | 2 | 2 | 5 |
| 2 | 4 | 4 | 2 | 2 | 3 | 2 | 4 | 3 |
| 3 | 2 | 4 | 3 | 3 | 5 | 4 | 5 | 4 |
| 1 | 1 | 5 | 4 | 1 | 1 | 5 | 3 | 5 |
| 4 | 4 | 2 | 2 | 4 | 4 | 4 | 4 | 4 |
| 3 | 4 | 3 | 2 | 3 | 3 | 3 | 3 | 4 |
| 5 | 5 | 1 | 5 | 5 | 5 | 1 | 5 | 5 |
| 4 | 4 | 2 | 1 | 3 | 5 | 2 | 4 | 5 |
| 3 | 5 | 2 | 1 | 5 | 3 | 3 | 2 | 5 |
| 3 | 4 | 4 | 2 | 3 | 4 | 2 | 3 | 4 |
| 3 | 3 | 3 | 3 | 3 | 3 | 3 | 3 | 3 |
| 5 | 5 | 5 | 5 | 5 | 5 | 5 | 5 | 5 |
| 3 | 3 | 3 | 3 | 3 | 3 | 3 | 3 | 3 |
| 3 | 4 | 3 | 3 | 4 | 4 | 2 | 1 | 5 |
| 4 | 4 | 5 | 5 | 5 | 5 | 4 | 4 | 4 |
| 4 | 4 | 2 | 1 | 4 | 4 | 2 | 3 | 4 |
| 3 | 4 | 2 | 3 | 1 | 2 | 5 | 2 | 4 |
| 3 | 3 | 1 | 3 | 3 | 4 | 4 | 4 | 4 |
| 4 | 4 | 2 | 2 | 4 | 4 | 2 | 4 | 4 |
| 3 | 3 | 3 | 3 | 3 | 3 | 3 | 3 | 3 |
| 3 | 4 | 3 | 2 | 2 | 4 | 2 | 3 | 4 |
| 3 | 4 | 4 | 2 | 4 | 4 | 2 | 3 | 4 |
| 4 | 4 | 4 | 3 | 4 | 4 | 3 | 3 | 4 |
| 3 | 2 | 4 | 3 | 2 | 2 | 4 | 3 | 2 |
| 3 | 3 | 3 | 3 | 3 | 3 | 3 | 3 | 3 |
| 4 | 4 | 2 | 2 | 4 | 4 | 2 | 4 | 4 |
| 3 | 3 | 2 | 2 | 2 | 2 | 2 | 2 | 4 |
| 2 | 4 | 3 | 1 | 2 | 3 | 2 | 2 | 4 |
| 2 | 3 | 3 | 3 | 3 | 3 | 2 | 3 | 3 |
| 4 | 4 | 1 | 1 | 3 | 4 | 1 | 4 | 5 |
| 4 | 5 | 4 | 2 | 4 | 4 | 3 | 2 | 4 |
| 2 | 2 | 4 | 4 | 1 | 3 | 4 | 2 | 2 |



|   |   |   |   |   |   |   |   |   |
|---|---|---|---|---|---|---|---|---|
| 4 | 4 | 2 | 2 | 4 | 4 | 2 | 4 | 4 |
| 5 | 5 | 2 | 1 | 5 | 5 | 1 | 5 | 4 |
| 4 | 4 | 2 | 2 | 4 | 5 | 2 | 3 | 4 |
| 2 | 3 | 2 | 2 | 2 | 3 | 4 | 3 | 3 |
| 2 | 4 | 4 | 2 | 2 | 2 | 2 | 2 | 4 |
| 4 | 4 | 2 | 1 | 5 | 5 | 2 | 4 | 5 |
| 3 | 4 | 2 | 1 | 3 | 3 | 2 | 4 | 4 |
| 2 | 1 | 3 | 1 | 2 | 4 | 4 | 1 | 3 |
| 4 | 4 | 2 | 2 | 2 | 4 | 2 | 2 | 4 |
| 1 | 1 | 5 | 3 | 2 | 1 | 5 | 1 | 4 |
| 4 | 4 | 3 | 2 | 3 | 4 | 2 | 3 | 3 |
| 4 | 4 | 2 | 2 | 3 | 1 | 2 | 3 | 4 |
| 4 | 4 | 2 | 2 | 4 | 4 | 1 | 3 | 4 |
| 2 | 4 | 2 | 1 | 5 | 5 | 4 | 1 | 4 |
| 3 | 3 | 3 | 1 | 3 | 3 | 1 | 3 | 5 |
| 3 | 3 | 2 | 2 | 3 | 3 | 3 | 3 | 3 |
| 2 | 4 | 4 | 2 | 3 | 3 | 2 | 3 | 4 |
| 3 | 3 | 3 | 3 | 3 | 3 | 3 | 3 | 3 |
| 5 | 5 | 5 | 1 | 5 | 5 | 5 | 5 | 5 |
| 4 | 4 | 4 | 4 | 4 | 4 | 4 | 3 | 4 |
| 4 | 4 | 4 | 3 | 2 | 4 | 4 | 2 | 4 |
| 5 | 5 | 2 | 1 | 5 | 5 | 1 | 2 | 5 |
| 4 | 4 | 3 | 2 | 5 | 5 | 3 | 4 | 4 |
| 5 | 5 | 2 | 1 | 5 | 5 | 1 | 5 | 5 |
| 4 | 3 | 3 | 5 | 5 | 1 | 1 | 1 | 1 |
| 2 | 4 | 2 | 2 | 2 | 3 | 2 | 2 | 2 |
| 4 | 4 | 2 | 1 | 5 | 5 | 2 | 5 | 5 |
| 3 | 5 | 3 | 1 | 3 | 3 | 1 | 5 | 3 |
| 3 | 3 | 3 | 2 | 3 | 3 | 3 | 5 | 3 |
| 3 | 3 | 3 | 3 | 3 | 3 | 3 | 3 | 2 |
| 2 | 5 | 2 | 1 | 4 | 5 | 2 | 3 | 5 |
| 3 | 3 | 3 | 3 | 3 | 3 | 3 | 3 | 3 |
| 4 | 4 | 2 | 2 | 4 | 4 | 2 | 4 | 4 |
| 1 | 1 | 5 | 3 | 1 | 3 | 4 | 2 | 1 |
| 2 | 2 | 4 | 2 | 2 | 4 | 4 | 2 | 4 |
| 2 | 4 | 3 | 2 | 2 | 1 | 1 | 1 | 1 |
| 1 | 4 | 2 | 4 | 4 | 4 | 4 | 4 | 4 |
| 2 | 4 | 2 | 2 | 4 | 3 | 2 | 2 | 4 |
| 5 | 5 | 3 | 2 | 3 | 1 | 1 | 3 | 4 |
| 2 | 4 | 4 | 1 | 2 | 4 | 5 | 1 | 3 |
| 1 | 4 | 3 | 1 | 5 | 5 | 1 | 2 | 5 |
| 3 | 3 | 3 | 3 | 3 | 3 | 3 | 3 | 3 |
| 2 | 4 | 4 | 2 | 3 | 4 | 4 | 2 | 4 |
| 2 | 5 | 4 | 2 | 1 | 1 | 2 | 2 | 4 |
| 4 | 4 | 4 | 4 | 4 | 4 | 4 | 4 | 4 |
| 2 | 4 | 2 | 2 | 2 | 2 | 2 | 4 | 4 |
| 4 | 4 | 2 | 2 | 3 | 4 | 2 | 2 | 4 |
| 1 | 2 | 4 | 1 | 5 | 2 | 4 | 3 | 4 |
| 4 | 1 | 2 | 1 | 4 | 4 | 1 | 4 | 4 |
| 4 | 4 | 1 | 1 | 4 | 4 | 1 | 4 | 4 |
| 3 | 3 | 3 | 3 | 3 | 3 | 3 | 3 | 3 |
| 4 | 3 | 3 | 3 | 3 | 3 | 3 | 3 | 5 |
| 3 | 4 | 2 | 2 | 3 | 3 | 2 | 4 | 4 |
| 3 | 3 | 2 | 2 | 3 | 2 | 2 | 3 | 4 |



|   |   |   |   |   |   |   |   |   |
|---|---|---|---|---|---|---|---|---|
| 2 | 4 | 2 | 2 | 2 | 3 | 2 | 2 | 3 |
| 3 | 4 | 3 | 3 | 3 | 3 | 3 | 2 | 4 |
| 3 | 3 | 3 | 3 | 3 | 3 | 3 | 3 | 3 |
| 3 | 4 | 2 | 1 | 4 | 4 | 1 | 3 | 4 |
| 1 | 5 | 5 | 5 | 2 | 1 | 5 | 1 | 2 |
| 2 | 4 | 2 | 1 | 3 | 3 | 1 | 4 | 4 |
| 4 | 4 | 2 | 1 | 4 | 4 | 2 | 3 | 4 |
| 3 | 2 | 3 | 2 | 3 | 3 | 2 | 2 | 3 |
| 5 | 5 | 1 | 1 | 5 | 5 | 1 | 5 | 5 |
| 3 | 2 | 5 | 1 | 2 | 5 | 1 | 5 | 5 |
| 4 | 4 | 4 | 4 | 4 | 4 | 4 | 4 | 4 |
| 3 | 3 | 2 | 3 | 5 | 5 | 5 | 4 | 4 |
| 5 | 5 | 3 | 1 | 4 | 5 | 1 | 3 | 5 |
| 3 | 4 | 3 | 3 | 3 | 3 | 3 | 3 | 3 |
| 4 | 4 | 4 | 2 | 3 | 4 | 3 | 2 | 4 |
| 5 | 5 | 1 | 1 | 5 | 5 | 1 | 1 | 5 |
| 3 | 3 | 3 | 3 | 3 | 3 | 3 | 3 | 3 |
| 3 | 3 | 4 | 3 | 3 | 3 | 3 | 3 | 3 |
| 3 | 4 | 2 | 1 | 3 | 4 | 3 | 4 | 5 |
| 4 | 4 | 2 | 2 | 4 | 4 | 2 | 4 | 4 |
| 3 | 3 | 3 | 2 | 3 | 3 | 3 | 3 | 4 |
| 4 | 4 | 2 | 2 | 4 | 4 | 2 | 4 | 4 |
| 3 | 4 | 4 | 3 | 3 | 3 | 4 | 3 | 3 |
| 3 | 4 | 4 | 2 | 3 | 4 | 2 | 2 | 4 |
| 3 | 3 | 3 | 3 | 3 | 3 | 3 | 3 | 3 |
| 3 | 2 | 2 | 2 | 5 | 5 | 5 | 2 | 2 |
| 5 | 5 | 1 | 1 | 5 | 5 | 1 | 4 | 5 |
| 2 | 2 | 4 | 2 | 2 | 3 | 3 | 3 | 4 |
| 5 | 5 | 1 | 1 | 5 | 5 | 5 | 5 | 5 |
| 2 | 4 | 4 | 2 | 2 | 2 | 2 | 2 | 2 |
| 3 | 3 | 3 | 3 | 3 | 3 | 3 | 3 | 3 |
| 5 | 5 | 2 | 2 | 5 | 5 | 1 | 5 | 5 |
| 3 | 4 | 3 | 3 | 4 | 3 | 3 | 2 | 3 |
| 3 | 4 | 2 | 2 | 3 | 3 | 2 | 3 | 4 |
| 5 | 5 | 1 | 1 | 5 | 5 | 1 | 5 | 5 |
| 3 | 4 | 3 | 2 | 3 | 3 | 3 | 3 | 3 |
| 4 | 5 | 2 | 1 | 4 | 4 | 2 | 2 | 4 |
| 4 | 4 | 4 | 3 | 3 | 2 | 4 | 2 | 2 |
| 3 | 3 | 5 | 3 | 2 | 3 | 4 | 1 | 3 |
| 4 | 4 | 2 | 2 | 4 | 3 | 3 | 4 | 4 |
| 3 | 4 | 2 | 2 | 2 | 3 | 2 | 4 | 3 |
| 2 | 5 | 4 | 2 | 2 | 2 | 1 | 1 | 5 |
| 2 | 2 | 3 | 2 | 2 | 4 | 2 | 2 | 4 |
| 4 | 3 | 2 | 2 | 3 | 4 | 2 | 3 | 4 |
| 4 | 4 | 1 | 1 | 3 | 4 | 2 | 3 | 4 |
| 4 | 4 | 2 | 1 | 3 | 4 | 1 | 3 | 4 |
| 3 | 2 | 3 | 3 | 3 | 2 | 4 | 3 | 3 |
| 4 | 4 | 2 | 2 | 4 | 4 | 2 | 4 | 4 |
| 2 | 2 | 4 | 4 | 2 | 3 | 3 | 3 | 3 |
| 3 | 3 | 3 | 2 | 3 | 3 | 3 | 3 | 3 |
| 2 | 4 | 2 | 2 | 4 | 4 | 2 | 4 | 4 |
| 3 | 3 | 3 | 3 | 3 | 3 | 3 | 3 | 3 |
| 4 | 4 | 3 | 2 | 3 | 4 | 2 | 3 | 4 |
| 2 | 4 | 2 | 2 | 3 | 2 | 3 | 2 | 4 |

|   |   |   |   |   |   |   |   |   |
|---|---|---|---|---|---|---|---|---|
| 4 | 4 | 3 | 3 | 3 | 2 | 2 | 2 | 2 |
| 4 | 4 | 2 | 3 | 2 | 3 | 4 | 5 | 3 |
| 3 | 3 | 4 | 3 | 3 | 2 | 4 | 4 | 3 |
| 1 | 2 | 3 | 3 | 1 | 2 | 3 | 2 | 4 |
| 3 | 2 | 2 | 2 | 3 | 3 | 2 | 3 | 4 |
| 4 | 3 | 2 | 2 | 4 | 4 | 2 | 3 | 4 |
| 1 | 3 | 4 | 2 | 3 | 3 | 4 | 1 | 2 |
| 2 | 2 | 4 | 1 | 1 | 2 | 3 | 2 | 2 |
| 1 | 1 | 4 | 2 | 1 | 2 | 2 | 2 | 3 |
| 3 | 3 | 3 | 3 | 2 | 2 | 3 | 2 | 2 |
| 3 | 4 | 3 | 2 | 4 | 4 | 2 | 4 | 4 |
| 3 | 4 | 2 | 1 | 3 | 4 | 2 | 3 | 4 |
| 4 | 4 | 5 | 5 | 2 | 3 | 1 | 3 | 5 |
| 2 | 4 | 2 | 1 | 3 | 4 | 2 | 4 | 4 |
| 4 | 4 | 3 | 3 | 4 | 4 | 2 | 4 | 4 |
| 4 | 4 | 2 | 1 | 4 | 3 | 2 | 5 | 4 |
| 2 | 4 | 3 | 3 | 2 | 4 | 4 | 2 | 4 |
| 3 | 4 | 3 | 2 | 3 | 3 | 2 | 2 | 2 |
| 2 | 4 | 1 | 1 | 3 | 3 | 1 | 4 | 4 |
| 3 | 4 | 2 | 1 | 3 | 3 | 1 | 2 | 4 |
| 2 | 4 | 4 | 3 | 2 | 3 | 3 | 3 | 4 |
| 4 | 4 | 4 | 4 | 4 | 4 | 4 | 4 | 4 |
| 4 | 3 | 2 | 2 | 2 | 3 | 1 | 4 | 4 |
| 3 | 3 | 3 | 3 | 3 | 3 | 3 | 3 | 3 |
| 5 | 5 | 2 | 1 | 5 | 5 | 2 | 4 | 5 |
| 2 | 3 | 1 | 1 | 1 | 5 | 1 | 5 | 5 |
| 3 | 3 | 2 | 1 | 3 | 3 | 2 | 3 | 4 |
| 4 | 4 | 3 | 2 | 4 | 4 | 2 | 3 | 4 |
| 3 | 3 | 3 | 2 | 4 | 3 | 3 | 2 | 4 |
| 2 | 4 | 2 | 1 | 3 | 2 | 1 | 2 | 1 |
| 4 | 2 | 3 | 4 | 2 | 4 | 3 | 2 | 2 |
| 4 | 4 | 3 | 2 | 3 | 3 | 2 | 2 | 3 |
| 4 | 4 | 3 | 4 | 4 | 4 | 4 | 4 | 4 |
| 3 | 3 | 4 | 4 | 4 | 4 | 4 | 4 | 4 |
| 4 | 4 | 2 | 2 | 4 | 5 | 2 | 3 | 4 |
| 3 | 3 | 3 | 3 | 3 | 3 | 3 | 3 | 4 |
| 5 | 5 | 5 | 5 | 5 | 5 | 5 | 5 | 5 |
| 5 | 5 | 2 | 1 | 5 | 5 | 1 | 4 | 5 |
| 3 | 4 | 4 | 5 | 5 | 4 | 4 | 5 | 4 |
| 5 | 5 | 2 | 1 | 5 | 5 | 1 | 2 | 5 |
| 4 | 4 | 4 | 4 | 4 | 4 | 4 | 4 | 4 |
| 2 | 3 | 4 | 3 | 3 | 3 | 3 | 3 | 3 |
| 2 | 3 | 3 | 1 | 5 | 5 | 2 | 3 | 3 |
| 4 | 4 | 4 | 2 | 4 | 4 | 2 | 4 | 4 |
| 4 | 4 | 4 | 4 | 4 | 4 | 4 | 4 | 4 |
| 3 | 3 | 3 | 2 | 2 | 3 | 4 | 3 | 4 |
| 4 | 3 | 2 | 2 | 4 | 4 | 2 | 4 | 4 |
| 3 | 4 | 3 | 1 | 5 | 4 | 2 | 4 | 4 |
| 4 | 4 | 2 | 2 | 4 | 4 | 2 | 4 | 4 |
| 4 | 4 | 2 | 2 | 4 | 4 | 2 | 3 | 4 |
| 4 | 2 | 2 | 2 | 4 | 3 | 2 | 4 | 4 |
| 3 | 3 | 3 | 3 | 3 | 3 | 3 | 3 | 4 |
| 5 | 5 | 2 | 2 | 4 | 4 | 1 | 4 | 5 |
| 5 | 1 | 1 | 1 | 5 | 5 | 1 | 3 | 5 |

|   |   |   |   |   |   |   |   |   |
|---|---|---|---|---|---|---|---|---|
| 5 | 5 | 2 | 1 | 5 | 5 | 1 | 5 | 5 |
| 5 | 5 | 1 | 1 | 5 | 5 | 1 | 5 | 5 |
| 4 | 3 | 2 | 2 | 3 | 3 | 1 | 5 | 5 |
| 4 | 4 | 4 | 2 | 4 | 4 | 2 | 3 | 4 |
| 5 | 5 | 2 | 1 | 5 | 5 | 1 | 3 | 4 |
| 5 | 5 | 1 | 1 | 4 | 5 | 1 | 5 | 4 |
| 2 | 4 | 2 | 1 | 3 | 4 | 4 | 2 | 4 |
| 5 | 2 | 2 | 1 | 1 | 4 | 1 | 1 | 5 |
| 2 | 4 | 2 | 1 | 3 | 5 | 1 | 3 | 5 |
| 5 | 5 | 2 | 1 | 5 | 5 | 2 | 4 | 5 |
| 5 | 3 | 2 | 1 | 3 | 3 | 1 | 3 | 3 |
| 2 | 2 | 3 | 4 | 4 | 5 | 3 | 3 | 3 |
| 4 | 4 | 3 | 2 | 3 | 4 | 3 | 2 | 4 |
| 4 | 4 | 2 | 2 | 4 | 4 | 2 | 4 | 4 |
| 4 | 4 | 2 | 2 | 4 | 4 | 2 | 4 | 4 |
| 3 | 3 | 4 | 3 | 3 | 3 | 3 | 3 | 3 |
| 2 | 4 | 4 | 2 | 3 | 2 | 2 | 3 | 4 |
| 5 | 4 | 1 | 1 | 4 | 5 | 1 | 3 | 4 |
| 3 | 4 | 2 | 2 | 3 | 4 | 2 | 2 | 4 |
| 1 | 2 | 1 | 1 | 5 | 5 | 2 | 4 | 5 |
| 5 | 5 | 3 | 1 | 5 | 5 | 1 | 5 | 5 |
| 4 | 3 | 3 | 3 | 3 | 3 | 4 | 5 | 5 |
| 3 | 3 | 3 | 3 | 3 | 3 | 3 | 3 | 3 |
| 3 | 4 | 3 | 3 | 3 | 3 | 3 | 3 | 4 |
| 4 | 5 | 5 | 4 | 4 | 4 | 4 | 5 | 5 |
| 3 | 3 | 3 | 3 | 3 | 3 | 3 | 3 | 3 |
| 3 | 3 | 3 | 3 | 3 | 3 | 3 | 3 | 3 |
| 3 | 3 | 2 | 1 | 4 | 4 | 2 | 4 | 5 |
| 4 | 4 | 2 | 2 | 4 | 4 | 1 | 4 | 4 |
| 3 | 3 | 5 | 2 | 1 | 1 | 5 | 2 | 3 |
| 4 | 4 | 2 | 2 | 3 | 4 | 2 | 3 | 4 |
| 2 | 3 | 2 | 2 | 2 | 3 | 2 | 3 | 3 |
| 4 | 5 | 5 | 5 | 5 | 5 | 5 | 5 | 5 |
| 4 | 4 | 3 | 2 | 3 | 4 | 2 | 4 | 4 |
| 4 | 4 | 2 | 2 | 5 | 4 | 2 | 3 | 4 |
| 5 | 4 | 2 | 1 | 5 | 5 | 1 | 4 | 5 |
| 4 | 3 | 3 | 2 | 3 | 4 | 1 | 5 | 5 |
| 4 | 4 | 3 | 3 | 4 | 4 | 4 | 4 | 4 |
| 3 | 3 | 1 | 1 | 3 | 5 | 1 | 5 | 5 |
| 4 | 4 | 2 | 2 | 4 | 4 | 2 | 4 | 4 |
| 5 | 5 | 5 | 5 | 5 | 5 | 5 | 5 | 5 |
| 3 | 3 | 3 | 3 | 3 | 3 | 3 | 3 | 3 |
| 3 | 2 | 1 | 1 | 3 | 3 | 2 | 4 | 3 |
| 3 | 4 | 3 | 3 | 3 | 3 | 3 | 3 | 3 |
| 4 | 4 | 2 | 1 | 4 | 4 | 1 | 4 | 5 |
| 3 | 3 | 3 | 3 | 3 | 3 | 3 | 3 | 3 |
| 1 | 5 | 5 | 1 | 2 | 1 | 1 | 1 | 5 |
| 3 | 3 | 3 | 3 | 3 | 3 | 3 | 3 | 5 |
| 3 | 3 | 3 | 2 | 3 | 3 | 2 | 3 | 4 |
| 3 | 3 | 3 | 3 | 3 | 3 | 3 | 3 | 3 |
| 3 | 3 | 4 | 3 | 3 | 3 | 3 | 3 | 3 |
| 4 | 3 | 2 | 2 | 3 | 3 | 2 | 2 | 4 |
| 4 | 4 | 2 | 2 | 4 | 5 | 2 | 4 | 4 |
| 4 | 4 | 3 | 2 | 4 | 3 | 2 | 3 | 5 |

|   |   |   |   |   |   |   |   |   |
|---|---|---|---|---|---|---|---|---|
| 5 | 5 | 1 | 1 | 5 | 5 | 1 | 5 | 5 |
| 5 | 5 | 1 | 1 | 5 | 5 | 1 | 5 | 5 |
| 3 | 5 | 2 | 1 | 5 | 5 | 1 | 5 | 5 |
| 4 | 4 | 1 | 1 | 3 | 4 | 1 | 4 | 4 |
| 3 | 3 | 3 | 2 | 1 | 1 | 5 | 2 | 3 |
| 5 | 5 | 3 | 1 | 5 | 5 | 1 | 5 | 5 |
| 1 | 5 | 4 | 2 | 4 | 4 | 2 | 4 | 4 |
| 5 | 4 | 5 | 4 | 4 | 3 | 4 | 5 | 3 |
| 5 | 5 | 5 | 5 | 5 | 5 | 5 | 5 | 5 |
| 3 | 5 | 3 | 1 | 4 | 4 | 1 | 4 | 4 |
| 4 | 4 | 2 | 2 | 3 | 4 | 2 | 4 | 4 |
| 5 | 5 | 5 | 2 | 3 | 3 | 2 | 3 | 4 |
| 2 | 5 | 2 | 1 | 5 | 5 | 1 | 5 | 5 |
| 3 | 3 | 3 | 3 | 3 | 3 | 3 | 3 | 3 |
| 2 | 4 | 4 | 2 | 4 | 2 | 4 | 4 | 3 |
| 2 | 4 | 4 | 2 | 4 | 3 | 2 | 5 | 5 |
| 4 | 3 | 2 | 1 | 5 | 3 | 1 | 4 | 5 |
| 5 | 4 | 4 | 5 | 4 | 4 | 4 | 4 | 3 |
| 3 | 3 | 3 | 3 | 3 | 3 | 2 | 3 | 3 |
| 4 | 4 | 3 | 1 | 4 | 4 | 1 | 4 | 4 |
| 2 | 4 | 3 | 3 | 4 | 3 | 2 | 5 | 4 |
| 4 | 4 | 2 | 2 | 4 | 4 | 2 | 4 | 5 |
| 3 | 3 | 1 | 1 | 4 | 5 | 1 | 5 | 3 |
| 5 | 5 | 2 | 1 | 5 | 3 | 1 | 4 | 5 |
| 3 | 1 | 4 | 3 | 3 | 3 | 3 | 3 | 3 |
| 3 | 4 | 3 | 1 | 5 | 5 | 1 | 5 | 5 |
| 5 | 5 | 2 | 1 | 5 | 3 | 1 | 2 | 5 |
| 2 | 4 | 5 | 2 | 3 | 2 | 3 | 3 | 3 |
| 2 | 4 | 2 | 1 | 3 | 4 | 2 | 2 | 5 |
| 3 | 3 | 3 | 3 | 3 | 3 | 3 | 3 | 3 |
| 3 | 3 | 3 | 2 | 3 | 3 | 3 | 3 | 3 |
| 5 | 5 | 1 | 1 | 5 | 5 | 1 | 4 | 5 |
| 4 | 4 | 2 | 2 | 2 | 4 | 2 | 4 | 4 |
| 5 | 5 | 4 | 1 | 4 | 4 | 1 | 3 | 4 |
| 1 | 2 | 4 | 2 | 1 | 2 | 4 | 3 | 1 |
| 3 | 2 | 3 | 2 | 2 | 1 | 3 | 2 | 3 |
| 3 | 3 | 3 | 3 | 3 | 3 | 3 | 3 | 3 |
| 5 | 5 | 1 | 1 | 5 | 5 | 1 | 5 | 5 |
| 2 | 4 | 2 | 2 | 2 | 2 | 2 | 2 | 4 |
| 5 | 5 | 2 | 1 | 5 | 3 | 1 | 3 | 3 |
| 4 | 3 | 3 | 2 | 4 | 4 | 2 | 3 | 3 |
| 5 | 5 | 1 | 1 | 5 | 5 | 1 | 5 | 5 |
| 3 | 5 | 3 | 1 | 5 | 5 | 1 | 2 | 5 |
| 5 | 5 | 1 | 1 | 5 | 5 | 1 | 5 | 5 |
| 3 | 3 | 3 | 3 | 3 | 3 | 3 | 3 | 3 |
| 4 | 2 | 3 | 2 | 3 | 3 | 2 | 3 | 4 |
| 4 | 3 | 3 | 1 | 2 | 3 | 1 | 4 | 4 |
| 3 | 4 | 2 | 1 | 2 | 2 | 1 | 2 | 5 |
| 2 | 2 | 4 | 2 | 2 | 3 | 3 | 2 | 3 |
| 5 | 5 | 1 | 1 | 5 | 5 | 1 | 5 | 5 |
| 4 | 3 | 3 | 3 | 3 | 3 | 3 | 3 | 3 |
| 4 | 5 | 3 | 1 | 3 | 4 | 1 | 5 | 5 |
| 5 | 5 | 1 | 1 | 5 | 5 | 1 | 5 | 5 |
| 3 | 4 | 4 | 2 | 4 | 3 | 2 | 2 | 3 |

|   |   |   |   |   |   |   |   |   |
|---|---|---|---|---|---|---|---|---|
| 3 | 3 | 3 | 3 | 3 | 3 | 3 | 3 | 3 |
| 3 | 3 | 3 | 2 | 4 | 3 | 3 | 3 | 4 |
| 4 | 4 | 2 | 2 | 4 | 3 | 2 | 2 | 2 |
| 3 | 3 | 3 | 3 | 3 | 3 | 3 | 3 | 3 |
| 5 | 5 | 5 | 5 | 3 | 5 | 5 | 4 | 2 |
| 4 | 4 | 3 | 1 | 4 | 4 | 1 | 5 | 4 |
| 2 | 3 | 5 | 3 | 3 | 3 | 4 | 1 | 2 |
| 2 | 4 | 2 | 2 | 2 | 3 | 2 | 4 | 3 |
| 5 | 5 | 2 | 2 | 5 | 2 | 2 | 3 | 4 |
| 5 | 5 | 3 | 1 | 5 | 5 | 1 | 5 | 5 |
| 5 | 5 | 1 | 1 | 5 | 5 | 1 | 5 | 5 |
| 3 | 4 | 3 | 2 | 3 | 3 | 2 | 4 | 4 |
| 5 | 5 | 1 | 1 | 5 | 5 | 1 | 5 | 5 |
| 5 | 4 | 4 | 4 | 4 | 4 | 4 | 4 | 4 |
| 3 | 3 | 2 | 1 | 4 | 5 | 1 | 3 | 5 |
| 5 | 1 | 5 | 3 | 5 | 5 | 1 | 5 | 5 |
| 3 | 3 | 2 | 1 | 3 | 5 | 1 | 3 | 5 |
| 5 | 5 | 1 | 1 | 3 | 1 | 2 | 4 | 4 |
| 3 | 3 | 3 | 1 | 3 | 4 | 1 | 5 | 5 |
| 3 | 3 | 3 | 3 | 3 | 3 | 3 | 3 | 3 |
| 3 | 4 | 3 | 2 | 3 | 4 | 1 | 5 | 4 |
| 3 | 3 | 3 | 3 | 3 | 3 | 3 | 3 | 3 |
| 5 | 5 | 5 | 1 | 5 | 5 | 1 | 5 | 5 |
| 3 | 5 | 1 | 1 | 5 | 5 | 1 | 5 | 5 |
| 2 | 2 | 2 | 2 | 2 | 2 | 2 | 2 | 2 |
| 3 | 3 | 3 | 4 | 4 | 3 | 2 | 3 | 4 |
| 2 | 2 | 3 | 2 | 3 | 4 | 2 | 4 | 4 |
| 2 | 4 | 3 | 2 | 2 | 3 | 2 | 2 | 3 |
| 4 | 2 | 4 | 2 | 3 | 4 | 2 | 4 | 4 |
| 3 | 3 | 3 | 2 | 3 | 3 | 2 | 2 | 4 |
| 2 | 2 | 2 | 2 | 4 | 2 | 2 | 2 | 4 |
| 3 | 3 | 3 | 3 | 3 | 3 | 3 | 3 | 3 |
| 4 | 4 | 2 | 2 | 4 | 4 | 2 | 3 | 4 |
| 3 | 3 | 3 | 3 | 3 | 3 | 3 | 3 | 3 |
| 3 | 3 | 3 | 3 | 3 | 3 | 3 | 3 | 3 |
| 4 | 4 | 4 | 2 | 2 | 2 | 2 | 2 | 4 |
| 2 | 3 | 4 | 2 | 3 | 3 | 3 | 2 | 4 |
| 2 | 3 | 1 | 3 | 2 | 4 | 3 | 3 | 4 |
| 3 | 3 | 3 | 3 | 3 | 3 | 3 | 3 | 3 |
| 3 | 3 | 3 | 3 | 3 | 3 | 3 | 3 | 3 |
| 2 | 2 | 5 | 3 | 2 | 2 | 5 | 2 | 2 |
| 4 | 3 | 3 | 2 | 4 | 4 | 3 | 3 | 3 |
| 4 | 4 | 3 | 2 | 4 | 4 | 2 | 3 | 4 |
| 2 | 3 | 3 | 3 | 3 | 3 | 4 | 2 | 3 |
| 2 | 4 | 4 | 2 | 3 | 4 | 3 | 2 | 3 |
| 5 | 5 | 1 | 1 | 5 | 5 | 1 | 5 | 5 |
| 3 | 3 | 3 | 3 | 3 | 3 | 3 | 3 | 3 |
| 4 | 4 | 2 | 2 | 4 | 4 | 2 | 4 | 4 |
| 4 | 4 | 3 | 2 | 4 | 4 | 3 | 4 | 4 |
| 2 | 4 | 2 | 1 | 3 | 3 | 2 | 3 | 4 |
| 4 | 3 | 4 | 1 | 3 | 3 | 2 | 3 | 3 |
| 4 | 2 | 2 | 2 | 4 | 2 | 2 | 4 | 4 |
| 3 | 3 | 3 | 3 | 3 | 3 | 3 | 3 | 3 |
| 3 | 4 | 3 | 1 | 3 | 3 | 3 | 3 | 4 |

|   |   |   |   |   |   |   |   |   |
|---|---|---|---|---|---|---|---|---|
| 3 | 4 | 4 | 2 | 3 | 4 | 2 | 3 | 4 |
| 2 | 4 | 4 | 2 | 3 | 3 | 3 | 2 | 2 |
| 2 | 2 | 4 | 2 | 3 | 3 | 2 | 2 | 2 |
| 4 | 4 | 2 | 2 | 4 | 4 | 2 | 3 | 4 |
| 2 | 2 | 4 | 3 | 2 | 2 | 3 | 2 | 2 |
| 1 | 1 | 5 | 1 | 1 | 1 | 1 | 1 | 1 |
| 4 | 2 | 4 | 2 | 1 | 2 | 2 | 2 | 3 |
| 3 | 3 | 3 | 3 | 3 | 3 | 3 | 3 | 3 |
| 4 | 5 | 4 | 1 | 5 | 4 | 2 | 3 | 5 |
| 5 | 5 | 2 | 2 | 4 | 4 | 2 | 4 | 4 |
| 4 | 4 | 2 | 2 | 2 | 2 | 2 | 2 | 4 |
| 2 | 1 | 1 | 1 | 1 | 1 | 1 | 1 | 1 |
| 5 | 3 | 2 | 2 | 2 | 3 | 2 | 4 | 3 |
| 2 | 2 | 4 | 2 | 3 | 2 | 3 | 2 | 2 |
| 4 | 4 | 2 | 1 | 3 | 5 | 1 | 2 | 5 |
| 1 | 1 | 3 | 2 | 2 | 3 | 3 | 3 | 2 |
| 3 | 4 | 3 | 2 | 4 | 4 | 2 | 4 | 4 |
| 2 | 4 | 1 | 3 | 4 | 4 | 3 | 3 | 4 |
| 4 | 4 | 2 | 2 | 3 | 4 | 2 | 3 | 4 |
| 2 | 1 | 5 | 4 | 1 | 2 | 4 | 3 | 1 |
| 5 | 5 | 3 | 4 | 5 | 5 | 5 | 4 | 4 |
| 3 | 3 | 3 | 3 | 3 | 3 | 3 | 3 | 3 |
| 3 | 3 | 3 | 2 | 2 | 3 | 3 | 3 | 3 |
| 4 | 4 | 4 | 4 | 4 | 4 | 4 | 4 | 4 |
| 2 | 4 | 4 | 4 | 4 | 4 | 2 | 4 | 4 |
| 3 | 4 | 3 | 4 | 4 | 5 | 4 | 3 | 4 |
| 3 | 3 | 3 | 3 | 3 | 3 | 3 | 3 | 3 |
| 1 | 1 | 5 | 2 | 1 | 1 | 5 | 1 | 1 |
| 2 | 4 | 3 | 2 | 2 | 2 | 4 | 2 | 3 |
| 4 | 4 | 2 | 2 | 4 | 3 | 2 | 2 | 4 |
| 3 | 2 | 1 | 1 | 3 | 3 | 1 | 1 | 4 |
| 3 | 4 | 3 | 2 | 3 | 3 | 2 | 4 | 4 |
| 3 | 3 | 3 | 3 | 3 | 3 | 3 | 3 | 3 |
| 5 | 5 | 5 | 1 | 5 | 4 | 3 | 3 | 3 |
| 2 | 2 | 2 | 2 | 2 | 2 | 2 | 2 | 2 |
| 4 | 4 | 2 | 2 | 4 | 3 | 2 | 4 | 4 |
| 3 | 4 | 3 | 2 | 3 | 4 | 3 | 4 | 4 |
| 4 | 4 | 4 | 4 | 4 | 4 | 4 | 4 | 4 |
| 2 | 4 | 2 | 2 | 2 | 4 | 2 | 4 | 4 |
| 2 | 3 | 4 | 3 | 2 | 3 | 3 | 2 | 3 |
| 5 | 5 | 2 | 1 | 5 | 5 | 1 | 1 | 3 |
| 2 | 4 | 3 | 2 | 3 | 3 | 2 | 3 | 4 |
| 4 | 5 | 5 | 2 | 5 | 5 | 1 | 5 | 4 |
| 3 | 5 | 3 | 2 | 2 | 4 | 3 | 2 | 3 |
| 3 | 4 | 4 | 2 | 3 | 3 | 4 | 4 | 4 |
| 2 | 2 | 4 | 4 | 2 | 3 | 3 | 2 | 4 |
| 3 | 4 | 2 | 2 | 3 | 4 | 2 | 3 | 4 |
| 3 | 3 | 3 | 3 | 3 | 3 | 3 | 3 | 3 |
| 2 | 4 | 5 | 2 | 2 | 3 | 2 | 2 | 2 |
| 3 | 4 | 2 | 2 | 2 | 4 | 2 | 4 | 4 |
| 4 | 4 | 2 | 2 | 4 | 4 | 2 | 3 | 4 |
| 3 | 4 | 2 | 1 | 4 | 4 | 1 | 4 | 4 |
| 3 | 4 | 3 | 1 | 3 | 3 | 1 | 4 | 4 |
| 2 | 5 | 2 | 1 | 4 | 4 | 2 | 4 | 4 |

|   |   |   |   |   |   |   |   |   |
|---|---|---|---|---|---|---|---|---|
| 3 | 3 | 3 | 2 | 3 | 2 | 2 | 3 | 3 |
| 4 | 4 | 4 | 2 | 4 | 4 | 2 | 3 | 4 |
| 3 | 3 | 4 | 2 | 3 | 3 | 3 | 3 | 3 |
| 3 | 3 | 3 | 2 | 3 | 4 | 3 | 4 | 4 |
| 4 | 4 | 4 | 3 | 3 | 2 | 1 | 1 | 1 |
| 3 | 3 | 3 | 3 | 3 | 4 | 2 | 3 | 3 |
| 2 | 1 | 1 | 2 | 4 | 3 | 1 | 2 | 2 |
| 4 | 4 | 1 | 1 | 4 | 4 | 1 | 4 | 4 |
| 5 | 1 | 1 | 1 | 4 | 4 | 1 | 2 | 2 |
| 4 | 4 | 1 | 1 | 4 | 4 | 1 | 3 | 4 |
| 4 | 4 | 1 | 1 | 5 | 5 | 1 | 3 | 5 |
| 4 | 5 | 1 | 1 | 4 | 4 | 1 | 2 | 4 |
| 3 | 4 | 2 | 2 | 4 | 4 | 2 | 3 | 4 |
| 3 | 3 | 3 | 3 | 3 | 3 | 3 | 3 | 3 |
| 5 | 5 | 2 | 1 | 5 | 5 | 1 | 3 | 5 |
| 4 | 4 | 2 | 2 | 4 | 2 | 2 | 2 | 4 |
| 5 | 5 | 1 | 1 | 5 | 4 | 1 | 3 | 5 |
| 2 | 2 | 2 | 2 | 2 | 3 | 3 | 2 | 3 |
| 3 | 3 | 2 | 1 | 3 | 2 | 3 | 2 | 3 |
| 2 | 2 | 4 | 3 | 2 | 2 | 3 | 2 | 3 |
| 3 | 5 | 2 | 1 | 4 | 2 | 1 | 3 | 4 |
| 3 | 3 | 2 | 1 | 3 | 3 | 2 | 3 | 3 |
| 5 | 5 | 1 | 1 | 5 | 5 | 1 | 5 | 5 |
| 5 | 5 | 1 | 1 | 5 | 5 | 1 | 5 | 5 |
| 5 | 5 | 1 | 1 | 4 | 5 | 1 | 5 | 5 |
| 2 | 2 | 4 | 4 | 4 | 2 | 2 | 2 | 2 |
| 4 | 4 | 2 | 2 | 4 | 4 | 2 | 4 | 4 |
| 5 | 5 | 5 | 1 | 5 | 5 | 1 | 5 | 5 |
| 4 | 3 | 2 | 3 | 3 | 4 | 3 | 3 | 4 |
| 5 | 5 | 1 | 1 | 5 | 5 | 1 | 5 | 5 |
| 2 | 3 | 1 | 2 | 3 | 3 | 1 | 3 | 3 |
| 4 | 4 | 2 | 2 | 3 | 4 | 2 | 3 | 4 |
| 4 | 2 | 5 | 3 | 3 | 3 | 3 | 3 | 4 |
| 5 | 5 | 1 | 2 | 5 | 5 | 1 | 3 | 5 |
| 3 | 3 | 4 | 2 | 3 | 3 | 4 | 1 | 3 |
| 4 | 4 | 2 | 1 | 4 | 3 | 2 | 2 | 4 |
| 3 | 4 | 4 | 2 | 3 | 3 | 3 | 2 | 4 |
| 1 | 1 | 5 | 4 | 1 | 1 | 5 | 1 | 1 |
| 3 | 3 | 3 | 3 | 3 | 3 | 3 | 3 | 3 |
| 3 | 4 | 4 | 1 | 3 | 3 | 2 | 3 | 5 |
| 5 | 5 | 2 | 1 | 4 | 4 | 1 | 4 | 5 |
| 3 | 3 | 3 | 2 | 3 | 4 | 2 | 4 | 4 |
| 3 | 3 | 3 | 3 | 3 | 3 | 3 | 3 | 3 |
| 4 | 3 | 2 | 2 | 3 | 3 | 2 | 4 | 4 |
| 2 | 3 | 4 | 2 | 2 | 3 | 3 | 3 | 3 |
| 2 | 3 | 2 | 1 | 2 | 3 | 2 | 3 | 3 |
| 2 | 4 | 2 | 2 | 3 | 3 | 2 | 2 | 5 |
| 3 | 4 | 3 | 3 | 3 | 3 | 2 | 4 | 3 |
| 4 | 4 | 2 | 1 | 4 | 4 | 1 | 4 | 4 |
| 3 | 4 | 3 | 2 | 3 | 4 | 2 | 2 | 5 |
| 4 | 4 | 3 | 2 | 4 | 4 | 1 | 4 | 4 |
| 5 | 5 | 1 | 1 | 5 | 5 | 1 | 5 | 5 |
| 1 | 1 | 2 | 2 | 2 | 1 | 3 | 2 | 3 |
| 4 | 5 | 1 | 1 | 4 | 4 | 2 | 2 | 4 |

|   |   |   |   |   |   |   |   |   |
|---|---|---|---|---|---|---|---|---|
| 1 | 4 | 3 | 2 | 1 | 4 | 3 | 2 | 4 |
| 2 | 4 | 2 | 1 | 4 | 5 | 2 | 5 | 5 |
| 1 | 3 | 2 | 1 | 3 | 1 | 1 | 1 | 4 |
| 1 | 1 | 5 | 5 | 1 | 1 | 5 | 1 | 1 |
| 3 | 4 | 2 | 2 | 3 | 3 | 3 | 3 | 3 |
| 2 | 2 | 4 | 2 | 3 | 2 | 3 | 2 | 3 |
| 3 | 2 | 3 | 2 | 3 | 3 | 3 | 3 | 4 |
| 4 | 1 | 4 | 2 | 2 | 4 | 2 | 4 | 4 |
| 4 | 3 | 2 | 2 | 3 | 3 | 2 | 4 | 4 |
| 2 | 4 | 3 | 2 | 2 | 3 | 4 | 2 | 4 |
| 4 | 3 | 3 | 2 | 3 | 3 | 2 | 3 | 4 |
| 2 | 1 | 3 | 2 | 1 | 3 | 2 | 3 | 3 |
| 4 | 4 | 3 | 1 | 4 | 3 | 2 | 2 | 3 |
| 5 | 5 | 2 | 1 | 4 | 5 | 1 | 5 | 5 |
| 5 | 5 | 1 | 1 | 4 | 5 | 1 | 5 | 5 |
| 3 | 3 | 3 | 3 | 3 | 3 | 3 | 3 | 3 |
| 3 | 4 | 4 | 2 | 3 | 4 | 3 | 4 | 3 |
| 5 | 5 | 1 | 1 | 4 | 4 | 1 | 4 | 4 |
| 3 | 3 | 3 | 3 | 3 | 3 | 3 | 3 | 3 |
| 3 | 4 | 2 | 2 | 3 | 4 | 2 | 4 | 4 |
| 3 | 4 | 2 | 2 | 3 | 4 | 2 | 2 | 3 |
| 2 | 4 | 4 | 3 | 2 | 2 | 3 | 2 | 2 |
| 5 | 5 | 5 | 5 | 5 | 5 | 4 | 4 | 4 |
| 3 | 3 | 3 | 3 | 3 | 3 | 3 | 3 | 3 |
| 2 | 4 | 4 | 2 | 3 | 4 | 2 | 3 | 4 |
| 3 | 3 | 3 | 3 | 3 | 3 | 3 | 3 | 3 |
| 3 | 3 | 3 | 3 | 3 | 3 | 3 | 3 | 3 |
| 5 | 5 | 1 | 1 | 4 | 4 | 1 | 3 | 4 |
| 3 | 3 | 3 | 3 | 3 | 3 | 3 | 3 | 3 |
| 4 | 3 | 3 | 2 | 3 | 3 | 3 | 3 | 3 |
| 3 | 3 | 3 | 3 | 3 | 3 | 3 | 3 | 3 |
| 2 | 2 | 4 | 3 | 2 | 3 | 3 | 2 | 2 |
| 4 | 4 | 3 | 2 | 4 | 4 | 2 | 3 | 4 |
| 3 | 3 | 2 | 2 | 3 | 4 | 2 | 3 | 3 |
| 3 | 4 | 4 | 2 | 2 | 3 | 2 | 3 | 3 |
| 4 | 4 | 2 | 2 | 4 | 4 | 2 | 4 | 4 |
| 4 | 5 | 2 | 2 | 5 | 5 | 1 | 5 | 5 |
| 3 | 3 | 3 | 3 | 3 | 3 | 3 | 3 | 3 |
| 3 | 3 | 3 | 2 | 2 | 3 | 3 | 3 | 3 |
| 3 | 3 | 3 | 3 | 3 | 3 | 3 | 3 | 3 |
| 4 | 4 | 2 | 2 | 3 | 3 | 2 | 3 | 4 |
| 2 | 4 | 2 | 1 | 4 | 4 | 1 | 2 | 3 |
| 3 | 4 | 3 | 2 | 3 | 3 | 2 | 3 | 3 |
| 5 | 2 | 2 | 2 | 2 | 2 | 2 | 4 | 4 |
| 3 | 3 | 3 | 3 | 3 | 3 | 3 | 3 | 3 |
| 2 | 2 | 5 | 2 | 4 | 2 | 4 | 2 | 4 |
| 4 | 5 | 1 | 1 | 5 | 4 | 2 | 2 | 5 |
| 3 | 4 | 2 | 1 | 4 | 5 | 2 | 4 | 4 |
| 5 | 4 | 2 | 2 | 4 | 4 | 2 | 2 | 4 |
| 4 | 4 | 2 | 1 | 4 | 5 | 1 | 2 | 4 |
| 3 | 3 | 2 | 1 | 3 | 4 | 1 | 3 | 3 |
| 4 | 4 | 3 | 1 | 4 | 4 | 2 | 2 | 4 |
| 3 | 5 | 1 | 1 | 5 | 5 | 2 | 4 | 5 |
| 2 | 4 | 4 | 1 | 4 | 4 | 2 | 2 | 4 |



|   |   |   |   |   |   |   |   |   |
|---|---|---|---|---|---|---|---|---|
| 4 | 4 | 3 | 2 | 3 | 4 | 2 | 3 | 4 |
| 4 | 4 | 2 | 2 | 4 | 4 | 2 | 4 | 4 |
| 4 | 4 | 3 | 2 | 3 | 4 | 3 | 3 | 4 |
| 5 | 5 | 1 | 1 | 5 | 5 | 1 | 2 | 5 |
| 5 | 4 | 1 | 1 | 4 | 5 | 1 | 4 | 5 |
| 2 | 4 | 4 | 1 | 4 | 4 | 2 | 2 | 4 |

| C69 | C70 | Excise atD1 | D2 | D3 | D4 | D5 | D6 |   |
|-----|-----|-------------|----|----|----|----|----|---|
| 4   | 5   | 337         | 1  | 1  | 1  | 1  | 2  | 1 |
| 1   | 1   | 207         | 1  | 1  | 2  | 1  | 4  | 3 |
| 5   | 5   | 345         | 2  | 2  | 3  | 2  | 2  | 2 |
| 5   | 4   | 321         | 2  | 3  | 1  | 2  | 2  | 2 |
| 1   | 3   | 212         | 4  | 1  | 4  | 1  | 4  | 1 |
| 4   | 4   | 339         | 1  | 2  | 2  | 2  | 1  | 2 |
| 5   | 4   | 309         | 3  | 3  | 2  | 3  | 3  | 3 |
| 5   | 2   | 228         | 4  | 3  | 3  | 3  | 1  | 3 |
| 1   | 1   | 217         | 2  | 3  | 1  | 1  | 1  | 1 |
| 3   | 5   | 302         | 1  | 1  | 1  | 1  | 2  | 2 |
| 2   | 2   | 287         | 3  | 1  | 1  | 1  | 2  | 3 |
| 2   | 2   | 230         | 2  | 3  | 1  | 1  | 2  | 1 |
| 1   | 1   | 323         | 1  | 1  | 1  | 1  | 4  | 1 |
| 4   | 5   | 332         | 4  | 4  | 4  | 4  | 3  | 4 |
| 5   | 5   | 282         | 4  | 3  | 1  | 4  | 4  | 4 |
| 5   | 5   | 349         | 1  | 1  | 1  | 1  | 1  | 1 |
| 1   | 2   | 208         | 1  | 2  | 1  | 2  | 2  | 2 |
| 5   | 5   | 333         | 4  | 4  | 4  | 4  | 4  | 4 |
| 2   | 3   | 233         | 2  | 2  | 1  | 2  | 4  | 2 |
| 2   | 5   | 224         | 2  | 1  | 1  | 1  | 3  | 2 |
| 2   | 1   | 301         | 2  | 2  | 2  | 2  | 3  | 2 |
| 5   | 5   | 321         | 2  | 2  | 2  | 3  | 3  | 3 |
| 1   | 1   | 305         | 1  | 1  | 1  | 1  | 1  | 1 |
| 1   | 1   | 287         | 3  | 2  | 1  | 1  | 2  | 1 |
| 3   | 3   | 244         | 2  | 1  | 2  | 1  | 2  | 2 |
| 2   | 2   | 207         | 2  | 2  | 3  | 2  | 2  | 3 |
| 3   | 3   | 257         | 2  | 2  | 2  | 2  | 2  | 2 |
| 1   | 2   | 273         | 3  | 2  | 2  | 2  | 2  | 2 |
| 1   | 1   | 232         | 1  | 3  | 1  | 1  | 1  | 1 |
| 2   | 2   | 320         | 1  | 1  | 1  | 1  | 1  | 1 |
| 1   | 1   | 324         | 2  | 2  | 1  | 1  | 1  | 1 |
| 1   | 1   | 324         | 1  | 1  | 1  | 2  | 1  | 1 |
| 1   | 2   | 268         | 1  | 4  | 4  | 4  | 3  | 1 |
| 1   | 4   | 257         | 3  | 3  | 3  | 3  | 3  | 3 |
| 1   | 4   | 239         | 2  | 3  | 2  | 1  | 3  | 1 |
| 3   | 3   | 301         | 1  | 1  | 1  | 1  | 1  | 1 |
| 1   | 2   | 258         | 4  | 4  | 4  | 4  | 4  | 4 |
| 5   | 5   | 320         | 4  | 4  | 4  | 4  | 4  | 4 |
| 1   | 2   | 274         | 1  | 1  | 1  | 1  | 1  | 1 |
| 1   | 1   | 302         | 4  | 4  | 4  | 4  | 1  | 1 |
| 1   | 1   | 279         | 1  | 1  | 1  | 1  | 1  | 1 |
| 4   | 2   | 320         | 1  | 1  | 1  | 1  | 1  | 1 |
| 1   | 1   | 235         | 3  | 3  | 3  | 3  | 3  | 3 |
| 1   | 1   | 266         | 1  | 1  | 1  | 1  | 1  | 1 |
| 3   | 4   | 257         | 1  | 1  | 1  | 4  | 2  | 2 |
| 4   | 4   | 324         | 3  | 3  | 3  | 3  | 3  | 3 |
| 4   | 4   | 226         | 1  | 1  | 1  | 1  | 1  | 1 |
| 4   | 5   | 263         | 1  | 4  | 4  | 4  | 4  | 4 |
| 2   | 2   | 322         | 1  | 2  | 2  | 2  | 1  | 2 |
| 1   | 1   | 266         | 3  | 3  | 2  | 3  | 3  | 2 |
| 3   | 3   | 258         | 4  | 4  | 4  | 4  | 4  | 4 |
| 1   | 1   | 240         | 2  | 2  | 1  | 1  | 1  | 1 |
| 1   | 2   | 339         | 1  | 1  | 1  | 1  | 1  | 1 |

|   |   |     |   |   |   |   |   |   |
|---|---|-----|---|---|---|---|---|---|
| 3 | 3 | 258 | 3 | 2 | 2 | 2 | 3 | 3 |
| 2 | 2 | 287 | 2 | 3 | 2 | 1 | 2 | 2 |
| 3 | 3 | 329 | 4 | 3 | 3 | 4 | 3 | 4 |
| 5 | 5 | 334 | 3 | 3 | 2 | 2 | 2 | 2 |
| 3 | 5 | 242 | 2 | 4 | 4 | 4 | 4 | 2 |
| 1 | 1 | 252 | 1 | 1 | 1 | 1 | 1 | 1 |
| 1 | 1 | 256 | 1 | 1 | 1 | 1 | 1 | 1 |
| 5 | 5 | 268 | 1 | 1 | 1 | 1 | 1 | 1 |
| 2 | 2 | 323 | 2 | 2 | 2 | 2 | 4 | 2 |
| 1 | 3 | 326 | 2 | 1 | 1 | 2 | 1 | 2 |
| 2 | 2 | 283 | 3 | 1 | 2 | 1 | 2 | 2 |
| 1 | 1 | 286 | 2 | 2 | 1 | 3 | 2 | 1 |
| 1 | 1 | 312 | 1 | 1 | 1 | 1 | 1 | 1 |
| 5 | 5 | 272 | 1 | 1 | 1 | 1 | 1 | 1 |
| 2 | 2 | 264 | 1 | 1 | 1 | 1 | 3 | 2 |
| 1 | 1 | 248 | 1 | 1 | 1 | 1 | 1 | 1 |
| 1 | 1 | 276 | 1 | 1 | 1 | 1 | 1 | 1 |
| 3 | 3 | 282 | 1 | 1 | 1 | 1 | 1 | 1 |
| 1 | 1 | 241 | 1 | 2 | 1 | 1 | 2 | 1 |
| 2 | 2 | 215 | 2 | 2 | 2 | 2 | 2 | 2 |
| 2 | 2 | 307 | 2 | 3 | 2 | 1 | 3 | 2 |
| 1 | 1 | 179 | 4 | 2 | 1 | 1 | 2 | 2 |
| 3 | 3 | 279 | 2 | 2 | 3 | 1 | 2 | 1 |
| 3 | 2 | 223 | 1 | 3 | 2 | 2 | 2 | 1 |
| 3 | 3 | 216 | 1 | 1 | 1 | 1 | 1 | 1 |
| 4 | 4 | 304 | 3 | 2 | 2 | 1 | 4 | 2 |
| 2 | 1 | 183 | 2 | 1 | 1 | 1 | 2 | 2 |
| 3 | 3 | 229 | 3 | 2 | 2 | 3 | 2 | 2 |
| 3 | 3 | 306 | 3 | 2 | 2 | 1 | 4 | 4 |
| 3 | 3 | 198 | 2 | 1 | 1 | 1 | 1 | 1 |
| 4 | 3 | 260 | 3 | 2 | 2 | 3 | 4 | 3 |
| 2 | 3 | 319 | 1 | 3 | 4 | 2 | 2 | 4 |
| 1 | 1 | 302 | 1 | 2 | 3 | 3 | 3 | 4 |
| 1 | 2 | 229 | 4 | 4 | 2 | 3 | 2 | 2 |
| 2 | 2 | 218 | 3 | 3 | 2 | 1 | 2 | 2 |
| 1 | 1 | 305 | 1 | 1 | 1 | 1 | 1 | 1 |
| 1 | 1 | 203 | 1 | 2 | 1 | 1 | 2 | 1 |
| 1 | 3 | 270 | 2 | 2 | 2 | 3 | 2 | 3 |
| 3 | 4 | 209 | 1 | 1 | 1 | 1 | 1 | 1 |
| 1 | 1 | 318 | 1 | 1 | 1 | 1 | 1 | 1 |
| 3 | 3 | 237 | 3 | 3 | 3 | 3 | 3 | 3 |
| 2 | 2 | 223 | 2 | 2 | 3 | 2 | 3 | 2 |
| 2 | 3 | 336 | 4 | 4 | 4 | 4 | 4 | 4 |
| 1 | 1 | 238 | 2 | 2 | 1 | 1 | 1 | 1 |
| 1 | 2 | 330 | 2 | 3 | 2 | 2 | 3 | 4 |
| 3 | 2 | 284 | 2 | 2 | 2 | 2 | 2 | 2 |
| 3 | 3 | 281 | 3 | 4 | 2 | 2 | 2 | 2 |
| 2 | 2 | 293 | 1 | 1 | 1 | 1 | 1 | 1 |
| 1 | 1 | 287 | 1 | 1 | 1 | 1 | 1 | 1 |
| 2 | 2 | 197 | 2 | 1 | 1 | 1 | 2 | 1 |
| 2 | 4 | 218 | 2 | 3 | 2 | 2 | 1 | 1 |
| 1 | 1 | 144 | 1 | 1 | 1 | 2 | 1 | 1 |
| 2 | 2 | 277 | 1 | 1 | 1 | 1 | 1 | 1 |
| 2 | 3 | 307 | 2 | 1 | 1 | 1 | 2 | 1 |

|   |   |     |   |   |   |   |   |   |
|---|---|-----|---|---|---|---|---|---|
| 3 | 2 | 217 | 4 | 4 | 2 | 4 | 4 | 4 |
| 5 | 5 | 248 | 3 | 3 | 2 | 3 | 3 | 1 |
| 1 | 2 | 226 | 2 | 4 | 2 | 4 | 4 | 2 |
| 1 | 1 | 268 | 1 | 4 | 1 | 1 | 4 | 1 |
| 1 | 1 | 310 | 2 | 2 | 1 | 2 | 2 | 2 |
| 1 | 1 | 211 | 2 | 3 | 1 | 2 | 2 | 1 |
| 4 | 4 | 214 | 3 | 2 | 1 | 2 | 4 | 2 |
| 2 | 2 | 293 | 1 | 1 | 1 | 1 | 3 | 1 |
| 1 | 1 | 191 | 1 | 1 | 1 | 1 | 3 | 1 |
| 3 | 3 | 178 | 2 | 2 | 1 | 2 | 2 | 1 |
| 3 | 3 | 271 | 3 | 4 | 3 | 2 | 3 | 3 |
| 1 | 1 | 242 | 1 | 1 | 1 | 1 | 1 | 1 |
| 1 | 1 | 272 | 1 | 2 | 3 | 2 | 3 | 3 |
| 2 | 2 | 272 | 3 | 2 | 2 | 1 | 2 | 1 |
| 3 | 2 | 250 | 2 | 2 | 1 | 2 | 2 | 1 |
| 2 | 2 | 257 | 3 | 3 | 1 | 1 | 3 | 3 |
| 1 | 1 | 255 | 3 | 3 | 1 | 2 | 2 | 1 |
| 2 | 2 | 230 | 1 | 1 | 1 | 1 | 4 | 1 |
| 1 | 1 | 212 | 2 | 4 | 2 | 1 | 2 | 2 |
| 4 | 2 | 215 | 3 | 3 | 3 | 3 | 3 | 3 |
| 2 | 1 | 285 | 1 | 2 | 2 | 1 | 1 | 2 |
| 1 | 1 | 281 | 1 | 1 | 1 | 1 | 1 | 1 |
| 3 | 3 | 298 | 4 | 4 | 4 | 4 | 4 | 4 |
| 3 | 3 | 270 | 3 | 2 | 1 | 2 | 2 | 3 |
| 2 | 2 | 228 | 1 | 2 | 2 | 2 | 3 | 2 |
| 2 | 3 | 317 | 3 | 2 | 3 | 1 | 2 | 1 |
| 2 | 3 | 274 | 1 | 2 | 3 | 1 | 2 | 2 |
| 3 | 4 | 292 | 3 | 2 | 2 | 2 | 4 | 2 |
| 1 | 3 | 208 | 1 | 1 | 1 | 1 | 2 | 2 |
| 1 | 1 | 211 | 3 | 1 | 1 | 1 | 3 | 2 |
| 1 | 2 | 255 | 2 | 1 | 3 | 2 | 4 | 1 |
| 2 | 2 | 300 | 2 | 1 | 2 | 1 | 1 | 1 |
| 3 | 4 | 264 | 3 | 3 | 2 | 1 | 2 | 3 |
| 5 | 5 | 274 | 3 | 2 | 1 | 1 | 3 | 2 |
| 1 | 3 | 253 | 1 | 1 | 1 | 1 | 1 | 1 |
| 2 | 1 | 231 | 2 | 1 | 1 | 1 | 2 | 1 |
| 2 | 5 | 195 | 1 | 1 | 1 | 1 | 1 | 1 |
| 2 | 2 | 156 | 1 | 1 | 1 | 1 | 1 | 1 |
| 1 | 2 | 206 | 4 | 2 | 1 | 1 | 4 | 2 |
| 5 | 3 | 180 | 2 | 2 | 2 | 2 | 2 | 2 |
| 1 | 1 | 346 | 3 | 3 | 2 | 1 | 3 | 2 |
| 2 | 5 | 289 | 3 | 3 | 2 | 4 | 4 | 3 |
| 2 | 3 | 165 | 2 | 3 | 2 | 3 | 3 | 1 |
| 2 | 3 | 300 | 1 | 2 | 2 | 1 | 2 | 2 |
| 1 | 1 | 261 | 1 | 1 | 1 | 1 | 1 | 1 |
| 1 | 3 | 220 | 2 | 2 | 1 | 1 | 3 | 2 |
| 3 | 3 | 300 | 3 | 4 | 1 | 3 | 4 | 1 |
| 1 | 2 | 262 | 1 | 1 | 2 | 3 | 3 | 1 |
| 2 | 2 | 226 | 2 | 2 | 2 | 1 | 2 | 4 |
| 2 | 2 | 254 | 1 | 1 | 1 | 1 | 4 | 3 |
| 2 | 1 | 279 | 1 | 2 | 1 | 1 | 2 | 2 |
| 5 | 3 | 242 | 4 | 2 | 1 | 2 | 4 | 3 |
| 3 | 3 | 233 | 2 | 3 | 2 | 4 | 3 | 2 |
| 2 | 2 | 216 | 1 | 1 | 1 | 1 | 1 | 1 |

|   |   |     |   |   |   |   |   |   |
|---|---|-----|---|---|---|---|---|---|
| 1 | 1 | 278 | 2 | 1 | 1 | 1 | 2 | 1 |
| 1 | 1 | 259 | 1 | 2 | 1 | 1 | 1 | 2 |
| 1 | 1 | 256 | 1 | 1 | 1 | 1 | 2 | 1 |
| 3 | 2 | 268 | 2 | 1 | 2 | 1 | 2 | 2 |
| 1 | 1 | 162 | 2 | 1 | 2 | 2 | 2 | 1 |
| 2 | 2 | 243 | 2 | 3 | 2 | 2 | 2 | 2 |
| 2 | 2 | 261 | 1 | 1 | 1 | 2 | 1 | 1 |
| 2 | 2 | 319 | 1 | 1 | 1 | 1 | 1 | 2 |
| 4 | 4 | 227 | 4 | 4 | 4 | 4 | 4 | 4 |
| 2 | 1 | 322 | 3 | 2 | 3 | 2 | 3 | 2 |
| 1 | 1 | 224 | 1 | 1 | 1 | 1 | 1 | 2 |
| 1 | 1 | 257 | 2 | 1 | 2 | 2 | 2 | 3 |
| 1 | 1 | 290 | 2 | 2 | 2 | 2 | 2 | 3 |
| 1 | 1 | 253 | 1 | 1 | 1 | 1 | 1 | 1 |
| 3 | 3 | 101 | 2 | 2 | 1 | 1 | 3 | 2 |
| 1 | 2 | 320 | 3 | 1 | 1 | 1 | 2 | 1 |
| 1 | 1 | 242 | 2 | 2 | 1 | 1 | 2 | 1 |
| 2 | 1 | 317 | 1 | 1 | 3 | 3 | 2 | 2 |
| 3 | 3 | 254 | 4 | 4 | 4 | 2 | 1 | 1 |
| 1 | 1 | 307 | 2 | 3 | 1 | 1 | 3 | 1 |
| 1 | 4 | 263 | 1 | 1 | 1 | 1 | 1 | 1 |
| 1 | 1 | 224 | 2 | 3 | 2 | 1 | 2 | 1 |
| 1 | 2 | 238 | 1 | 1 | 2 | 1 | 3 | 2 |
| 1 | 1 | 121 | 1 | 3 | 2 | 1 | 1 | 2 |
| 3 | 5 | 334 | 2 | 2 | 1 | 1 | 4 | 1 |
| 2 | 4 | 266 | 1 | 2 | 2 | 1 | 2 | 1 |
| 1 | 2 | 232 | 1 | 1 | 2 | 2 | 1 | 1 |
| 4 | 3 | 326 | 2 | 4 | 4 | 2 | 4 | 3 |
| 2 | 3 | 302 | 2 | 1 | 4 | 2 | 2 | 2 |
| 5 | 4 | 262 | 1 | 1 | 1 | 1 | 2 | 1 |
| 2 | 2 | 226 | 2 | 1 | 1 | 1 | 1 | 1 |
| 1 | 1 | 284 | 1 | 1 | 2 | 2 | 1 | 1 |
| 1 | 1 | 329 | 3 | 3 | 1 | 1 | 1 | 1 |
| 1 | 1 | 305 | 1 | 3 | 3 | 3 | 2 | 2 |
| 1 | 1 | 258 | 3 | 2 | 2 | 1 | 2 | 1 |
| 1 | 1 | 114 | 3 | 3 | 2 | 1 | 1 | 1 |
| 3 | 3 | 179 | 1 | 1 | 4 | 1 | 2 | 1 |
| 1 | 1 | 254 | 2 | 2 | 2 | 2 | 3 | 4 |
| 1 | 1 | 258 | 1 | 1 | 1 | 1 | 2 | 1 |
| 1 | 1 | 268 | 3 | 3 | 3 | 3 | 3 | 3 |
| 1 | 1 | 230 | 2 | 4 | 2 | 2 | 2 | 2 |
| 2 | 2 | 245 | 3 | 2 | 2 | 2 | 2 | 2 |
| 1 | 3 | 210 | 3 | 4 | 4 | 4 | 4 | 4 |
| 1 | 1 | 330 | 1 | 2 | 1 | 1 | 2 | 2 |
| 2 | 2 | 314 | 2 | 2 | 1 | 2 | 1 | 3 |
| 2 | 2 | 324 | 2 | 2 | 2 | 1 | 2 | 2 |
| 3 | 3 | 299 | 1 | 4 | 1 | 1 | 1 | 1 |
| 1 | 1 | 243 | 1 | 1 | 1 | 1 | 1 | 1 |
| 1 | 1 | 216 | 2 | 1 | 1 | 2 | 2 | 1 |
| 1 | 1 | 268 | 1 | 1 | 1 | 2 | 1 | 2 |
| 1 | 1 | 229 | 2 | 2 | 1 | 2 | 4 | 3 |
| 2 | 4 | 131 | 1 | 1 | 1 | 1 | 1 | 1 |
| 3 | 3 | 293 | 1 | 1 | 1 | 1 | 1 | 1 |
| 1 | 1 | 235 | 3 | 4 | 3 | 2 | 4 | 4 |

|   |   |     |   |   |   |   |   |   |
|---|---|-----|---|---|---|---|---|---|
| 3 | 3 | 266 | 1 | 2 | 1 | 2 | 3 | 2 |
| 4 | 2 | 198 | 4 | 3 | 1 | 4 | 4 | 4 |
| 1 | 1 | 137 | 3 | 2 | 2 | 1 | 2 | 2 |
| 2 | 2 | 280 | 2 | 3 | 1 | 1 | 2 | 1 |
| 5 | 1 | 237 | 2 | 2 | 2 | 2 | 4 | 2 |
| 2 | 2 | 250 | 1 | 1 | 1 | 1 | 1 | 1 |
| 4 | 4 | 258 | 4 | 4 | 4 | 4 | 4 | 4 |
| 1 | 3 | 214 | 3 | 3 | 2 | 1 | 1 | 2 |
| 2 | 2 | 162 | 2 | 2 | 2 | 2 | 1 | 1 |
| 2 | 2 | 263 | 4 | 4 | 3 | 3 | 3 | 2 |
| 1 | 1 | 221 | 1 | 3 | 3 | 3 | 2 | 1 |
| 1 | 1 | 195 | 2 | 4 | 1 | 1 | 4 | 1 |
| 1 | 1 | 120 | 3 | 3 | 2 | 1 | 1 | 2 |
| 2 | 2 | 224 | 1 | 1 | 1 | 1 | 2 | 1 |
| 3 | 3 | 225 | 1 | 1 | 3 | 1 | 3 | 3 |
| 1 | 1 | 280 | 2 | 4 | 4 | 1 | 2 | 2 |
| 3 | 3 | 256 | 2 | 2 | 2 | 2 | 2 | 2 |
| 2 | 3 | 251 | 1 | 1 | 1 | 1 | 1 | 1 |
| 3 | 3 | 322 | 2 | 2 | 2 | 1 | 2 | 2 |
| 1 | 1 | 304 | 4 | 2 | 4 | 1 | 4 | 3 |
| 2 | 2 | 222 | 3 | 1 | 2 | 1 | 2 | 2 |
| 3 | 3 | 222 | 1 | 4 | 2 | 2 | 3 | 3 |
| 1 | 1 | 220 | 1 | 1 | 1 | 1 | 1 | 1 |
| 1 | 1 | 311 | 2 | 1 | 2 | 1 | 1 | 2 |
| 3 | 3 | 160 | 2 | 2 | 2 | 2 | 3 | 2 |
| 3 | 3 | 282 | 4 | 3 | 1 | 3 | 4 | 1 |
| 2 | 3 | 214 | 1 | 1 | 1 | 1 | 2 | 2 |
| 1 | 1 | 119 | 1 | 1 | 1 | 1 | 1 | 1 |
| 5 | 1 | 180 | 2 | 4 | 3 | 1 | 4 | 2 |
| 1 | 1 | 174 | 1 | 1 | 2 | 1 | 2 | 1 |
| 2 | 2 | 266 | 2 | 2 | 2 | 2 | 2 | 2 |
| 4 | 5 | 251 | 2 | 4 | 4 | 4 | 4 | 2 |
| 3 | 3 | 252 | 3 | 3 | 3 | 4 | 3 | 3 |
| 2 | 2 | 269 | 3 | 2 | 2 | 1 | 4 | 2 |
| 1 | 1 | 134 | 1 | 1 | 1 | 1 | 2 | 2 |
| 2 | 1 | 279 | 1 | 2 | 2 | 1 | 2 | 1 |
| 1 | 2 | 166 | 1 | 2 | 1 | 1 | 1 | 1 |
| 1 | 1 | 238 | 1 | 3 | 1 | 1 | 4 | 4 |
| 4 | 4 | 237 | 2 | 2 | 1 | 1 | 1 | 1 |
| 1 | 1 | 280 | 1 | 1 | 1 | 1 | 1 | 1 |
| 2 | 2 | 208 | 3 | 1 | 1 | 1 | 1 | 1 |
| 3 | 1 | 219 | 2 | 2 | 2 | 1 | 2 | 2 |
| 2 | 1 | 245 | 3 | 3 | 2 | 3 | 4 | 4 |
| 1 | 1 | 244 | 1 | 1 | 1 | 1 | 1 | 1 |
| 3 | 3 | 244 | 4 | 4 | 4 | 4 | 4 | 4 |
| 3 | 3 | 180 | 1 | 1 | 1 | 1 | 1 | 1 |
| 2 | 2 | 234 | 1 | 1 | 1 | 1 | 2 | 1 |
| 2 | 1 | 233 | 2 | 2 | 3 | 2 | 1 | 1 |
| 1 | 2 | 310 | 3 | 3 | 2 | 1 | 3 | 3 |
| 4 | 4 | 313 | 1 | 3 | 3 | 2 | 3 | 2 |
| 4 | 3 | 252 | 1 | 3 | 3 | 2 | 3 | 2 |
| 1 | 1 | 310 | 2 | 4 | 1 | 2 | 3 | 1 |
| 3 | 3 | 265 | 1 | 1 | 1 | 1 | 1 | 1 |
| 2 | 2 | 329 | 2 | 3 | 1 | 2 | 2 | 1 |

|   |   |     |   |   |   |   |   |   |
|---|---|-----|---|---|---|---|---|---|
| 1 | 1 | 221 | 2 | 2 | 1 | 2 | 1 | 1 |
| 1 | 1 | 112 | 2 | 1 | 1 | 1 | 2 | 2 |
| 1 | 1 | 315 | 2 | 2 | 1 | 1 | 3 | 1 |
| 2 | 2 | 304 | 2 | 2 | 2 | 2 | 2 | 2 |
| 2 | 2 | 262 | 4 | 4 | 4 | 4 | 4 | 4 |
| 1 | 1 | 213 | 3 | 3 | 2 | 1 | 2 | 2 |
| 1 | 1 | 154 | 3 | 3 | 3 | 3 | 3 | 3 |
| 1 | 1 | 257 | 3 | 1 | 1 | 1 | 1 | 1 |
| 3 | 4 | 274 | 2 | 2 | 1 | 1 | 2 | 2 |
| 3 | 3 | 209 | 2 | 2 | 2 | 1 | 1 | 1 |
| 1 | 2 | 295 | 2 | 2 | 2 | 1 | 1 | 1 |
| 2 | 1 | 274 | 3 | 3 | 2 | 1 | 3 | 3 |
| 2 | 2 | 311 | 1 | 2 | 2 | 1 | 2 | 1 |
| 1 | 1 | 112 | 1 | 1 | 1 | 1 | 1 | 1 |
| 1 | 1 | 292 | 1 | 1 | 1 | 1 | 1 | 1 |
| 2 | 2 | 300 | 2 | 1 | 1 | 1 | 1 | 1 |
| 3 | 3 | 207 | 4 | 4 | 3 | 3 | 4 | 4 |
| 2 | 2 | 252 | 2 | 2 | 1 | 1 | 2 | 1 |
| 1 | 1 | 254 | 1 | 1 | 1 | 1 | 1 | 1 |
| 2 | 3 | 262 | 3 | 3 | 2 | 1 | 2 | 3 |
| 4 | 4 | 224 | 1 | 2 | 1 | 1 | 1 | 4 |
| 1 | 2 | 259 | 1 | 1 | 1 | 1 | 1 | 1 |
| 4 | 4 | 154 | 2 | 3 | 1 | 1 | 2 | 2 |
| 2 | 2 | 271 | 1 | 1 | 1 | 1 | 1 | 3 |
| 5 | 5 | 239 | 3 | 3 | 3 | 3 | 3 | 3 |
| 5 | 5 | 254 | 3 | 2 | 1 | 3 | 4 | 3 |
| 1 | 1 | 311 | 2 | 2 | 4 | 3 | 4 | 2 |
| 2 | 2 | 300 | 2 | 3 | 3 | 2 | 3 | 2 |
| 1 | 5 | 253 | 4 | 1 | 4 | 3 | 4 | 4 |
| 1 | 1 | 279 | 1 | 1 | 1 | 1 | 1 | 1 |
| 1 | 1 | 262 | 1 | 1 | 1 | 2 | 2 | 3 |
| 3 | 3 | 219 | 1 | 1 | 1 | 1 | 1 | 1 |
| 3 | 3 | 246 | 2 | 1 | 1 | 1 | 2 | 2 |
| 5 | 5 | 269 | 2 | 2 | 2 | 1 | 2 | 2 |
| 3 | 3 | 279 | 3 | 2 | 2 | 2 | 2 | 2 |
| 1 | 3 | 207 | 4 | 1 | 3 | 3 | 3 | 3 |
| 5 | 4 | 222 | 1 | 1 | 1 | 1 | 1 | 1 |
| 2 | 1 | 264 | 1 | 1 | 1 | 1 | 1 | 2 |
| 1 | 1 | 207 | 1 | 1 | 1 | 1 | 1 | 1 |
| 3 | 3 | 289 | 3 | 2 | 2 | 3 | 2 | 3 |
| 2 | 2 | 257 | 2 | 3 | 1 | 2 | 3 | 3 |
| 3 | 3 | 235 | 2 | 2 | 2 | 2 | 2 | 2 |
| 1 | 3 | 186 | 1 | 1 | 1 | 2 | 2 | 2 |
| 2 | 2 | 251 | 2 | 2 | 1 | 1 | 1 | 1 |
| 3 | 3 | 273 | 3 | 3 | 2 | 2 | 3 | 2 |
| 3 | 4 | 265 | 2 | 2 | 1 | 1 | 3 | 1 |
| 4 | 2 | 242 | 2 | 2 | 2 | 2 | 2 | 2 |
| 2 | 2 | 206 | 1 | 1 | 1 | 1 | 1 | 1 |
| 1 | 1 | 294 | 1 | 1 | 1 | 1 | 2 | 1 |
| 1 | 2 | 250 | 3 | 3 | 3 | 2 | 2 | 3 |
| 3 | 4 | 170 | 2 | 2 | 1 | 1 | 3 | 3 |
| 1 | 1 | 287 | 1 | 1 | 1 | 1 | 1 | 1 |
| 3 | 2 | 263 | 1 | 1 | 1 | 1 | 1 | 1 |
| 5 | 4 | 233 | 3 | 2 | 2 | 3 | 4 | 2 |

|   |   |     |   |   |   |   |   |   |
|---|---|-----|---|---|---|---|---|---|
| 1 | 1 | 282 | 1 | 2 | 1 | 1 | 3 | 2 |
| 2 | 2 | 243 | 2 | 2 | 1 | 1 | 2 | 1 |
| 3 | 3 | 187 | 2 | 1 | 1 | 1 | 3 | 2 |
| 1 | 2 | 281 | 1 | 1 | 1 | 1 | 1 | 1 |
| 3 | 1 | 224 | 4 | 4 | 4 | 4 | 4 | 4 |
| 4 | 4 | 244 | 3 | 2 | 2 | 2 | 2 | 2 |
| 1 | 2 | 229 | 1 | 1 | 2 | 1 | 2 | 2 |
| 2 | 2 | 239 | 2 | 3 | 3 | 2 | 4 | 4 |
| 2 | 2 | 273 | 2 | 2 | 1 | 1 | 2 | 2 |
| 3 | 3 | 252 | 4 | 4 | 4 | 4 | 4 | 4 |
| 1 | 1 | 256 | 2 | 2 | 1 | 2 | 2 | 1 |
| 2 | 2 | 255 | 2 | 1 | 2 | 1 | 2 | 2 |
| 2 | 1 | 234 | 3 | 3 | 3 | 3 | 3 | 3 |
| 2 | 2 | 242 | 3 | 3 | 3 | 2 | 2 | 2 |
| 2 | 2 | 275 | 3 | 3 | 2 | 2 | 2 | 2 |
| 4 | 4 | 238 | 4 | 4 | 4 | 4 | 4 | 4 |
| 1 | 4 | 215 | 1 | 1 | 1 | 1 | 2 | 1 |
| 2 | 2 | 252 | 2 | 3 | 2 | 1 | 2 | 1 |
| 2 | 3 | 223 | 3 | 3 | 3 | 3 | 3 | 3 |
| 3 | 3 | 291 | 2 | 2 | 2 | 2 | 3 | 2 |
| 1 | 2 | 255 | 2 | 2 | 1 | 1 | 2 | 2 |
| 3 | 3 | 260 | 3 | 2 | 2 | 2 | 3 | 2 |
| 1 | 1 | 307 | 1 | 2 | 1 | 1 | 1 | 1 |
| 1 | 1 | 197 | 1 | 2 | 1 | 2 | 2 | 1 |
| 2 | 2 | 258 | 1 | 1 | 1 | 1 | 1 | 1 |
| 1 | 1 | 236 | 2 | 1 | 1 | 1 | 3 | 1 |
| 1 | 2 | 270 | 2 | 2 | 2 | 2 | 2 | 2 |
| 2 | 2 | 249 | 2 | 1 | 2 | 1 | 3 | 2 |
| 1 | 2 | 248 | 2 | 2 | 1 | 2 | 3 | 2 |
| 2 | 3 | 237 | 2 | 1 | 2 | 2 | 2 | 2 |
| 2 | 2 | 278 | 1 | 2 | 1 | 1 | 2 | 1 |
| 1 | 1 | 217 | 2 | 2 | 2 | 2 | 2 | 2 |
| 2 | 2 | 199 | 3 | 3 | 2 | 2 | 3 | 2 |
| 2 | 2 | 222 | 4 | 1 | 1 | 3 | 2 | 3 |
| 2 | 2 | 251 | 2 | 1 | 1 | 1 | 1 | 1 |
| 2 | 3 | 264 | 3 | 1 | 1 | 1 | 1 | 3 |
| 2 | 1 | 206 | 3 | 1 | 1 | 2 | 4 | 2 |
| 3 | 3 | 228 | 3 | 2 | 2 | 2 | 2 | 2 |
| 2 | 2 | 197 | 2 | 2 | 2 | 2 | 2 | 1 |
| 1 | 1 | 221 | 4 | 4 | 4 | 4 | 4 | 4 |
| 2 | 4 | 239 | 2 | 1 | 1 | 2 | 3 | 1 |
| 3 | 3 | 256 | 2 | 3 | 3 | 2 | 2 | 3 |
| 3 | 3 | 229 | 2 | 3 | 2 | 2 | 3 | 2 |
| 2 | 2 | 291 | 2 | 2 | 1 | 1 | 1 | 1 |
| 2 | 2 | 291 | 3 | 2 | 4 | 2 | 2 | 2 |
| 3 | 2 | 255 | 2 | 2 | 1 | 1 | 2 | 2 |
| 1 | 1 | 314 | 1 | 3 | 1 | 2 | 2 | 1 |
| 2 | 2 | 255 | 2 | 2 | 2 | 1 | 1 | 4 |
| 1 | 2 | 242 | 1 | 1 | 1 | 1 | 1 | 1 |
| 2 | 1 | 229 | 4 | 4 | 4 | 3 | 3 | 3 |
| 1 | 1 | 258 | 1 | 1 | 1 | 4 | 2 | 2 |
| 2 | 1 | 317 | 2 | 3 | 2 | 3 | 3 | 3 |
| 5 | 4 | 252 | 2 | 3 | 2 | 2 | 2 | 3 |
| 2 | 2 | 195 | 1 | 2 | 2 | 2 | 2 | 2 |



|   |   |     |   |   |   |   |   |   |
|---|---|-----|---|---|---|---|---|---|
| 2 | 2 | 208 | 1 | 1 | 1 | 1 | 2 | 1 |
| 1 | 1 | 327 | 1 | 1 | 1 | 1 | 1 | 1 |
| 2 | 2 | 264 | 3 | 2 | 2 | 3 | 2 | 3 |
| 2 | 4 | 217 | 2 | 2 | 3 | 2 | 2 | 2 |
| 2 | 3 | 254 | 3 | 2 | 1 | 2 | 2 | 2 |
| 1 | 1 | 182 | 1 | 1 | 1 | 1 | 1 | 1 |
| 1 | 1 | 257 | 1 | 1 | 1 | 1 | 2 | 2 |
| 2 | 2 | 246 | 1 | 1 | 1 | 1 | 2 | 1 |
| 2 | 2 | 253 | 1 | 2 | 2 | 4 | 2 | 3 |
| 3 | 3 | 234 | 1 | 1 | 1 | 1 | 3 | 1 |
| 1 | 2 | 254 | 1 | 1 | 1 | 1 | 2 | 1 |
| 1 | 1 | 234 | 4 | 3 | 3 | 4 | 4 | 3 |
| 2 | 2 | 223 | 3 | 3 | 3 | 2 | 2 | 2 |
| 1 | 1 | 216 | 1 | 2 | 1 | 2 | 2 | 2 |
| 3 | 3 | 302 | 1 | 2 | 2 | 1 | 2 | 2 |
| 3 | 2 | 287 | 1 | 4 | 1 | 1 | 1 | 1 |
| 2 | 2 | 252 | 1 | 2 | 1 | 1 | 2 | 1 |
| 3 | 3 | 310 | 1 | 1 | 3 | 1 | 2 | 1 |
| 5 | 5 | 276 | 1 | 4 | 4 | 1 | 1 | 1 |
| 3 | 2 | 310 | 4 | 4 | 4 | 2 | 3 | 1 |
| 2 | 2 | 153 | 3 | 3 | 2 | 2 | 3 | 2 |
| 1 | 1 | 214 | 1 | 1 | 1 | 1 | 1 | 1 |
| 2 | 1 | 304 | 3 | 2 | 2 | 2 | 2 | 2 |
| 1 | 1 | 251 | 2 | 2 | 1 | 1 | 1 | 2 |
| 1 | 1 | 234 | 2 | 1 | 2 | 1 | 4 | 4 |
| 2 | 2 | 225 | 1 | 2 | 2 | 2 | 1 | 2 |
| 2 | 1 | 293 | 2 | 1 | 2 | 1 | 2 | 2 |
| 1 | 1 | 220 | 2 | 1 | 1 | 1 | 4 | 1 |
| 3 | 2 | 301 | 1 | 2 | 2 | 2 | 4 | 2 |
| 2 | 1 | 113 | 4 | 4 | 4 | 4 | 4 | 4 |
| 1 | 2 | 205 | 1 | 2 | 1 | 1 | 2 | 1 |
| 3 | 3 | 199 | 2 | 2 | 2 | 2 | 2 | 2 |
| 2 | 2 | 206 | 2 | 2 | 1 | 2 | 2 | 2 |
| 4 | 5 | 240 | 2 | 1 | 1 | 1 | 2 | 1 |
| 2 | 3 | 266 | 2 | 1 | 1 | 1 | 2 | 1 |
| 1 | 1 | 200 | 1 | 1 | 1 | 1 | 1 | 1 |
| 4 | 4 | 282 | 1 | 1 | 2 | 1 | 4 | 4 |
| 1 | 1 | 226 | 2 | 2 | 3 | 2 | 2 | 2 |
| 2 | 2 | 194 | 2 | 2 | 2 | 2 | 2 | 2 |
| 1 | 3 | 213 | 3 | 2 | 1 | 1 | 3 | 2 |
| 1 | 1 | 234 | 1 | 3 | 1 | 1 | 1 | 1 |
| 3 | 3 | 253 | 1 | 1 | 1 | 2 | 1 | 1 |
| 1 | 4 | 259 | 1 | 3 | 1 | 1 | 1 | 3 |
| 2 | 2 | 180 | 1 | 1 | 1 | 1 | 1 | 1 |
| 4 | 4 | 289 | 3 | 3 | 3 | 3 | 3 | 3 |
| 2 | 1 | 281 | 3 | 1 | 1 | 1 | 3 | 3 |
| 2 | 2 | 229 | 1 | 1 | 1 | 1 | 1 | 1 |
| 2 | 3 | 219 | 4 | 2 | 1 | 3 | 2 | 2 |
| 1 | 1 | 215 | 4 | 4 | 4 | 4 | 4 | 4 |
| 1 | 1 | 247 | 2 | 1 | 1 | 1 | 1 | 1 |
| 3 | 3 | 229 | 4 | 2 | 1 | 1 | 3 | 2 |
| 4 | 4 | 227 | 2 | 4 | 1 | 1 | 2 | 1 |
| 2 | 2 | 232 | 2 | 1 | 1 | 1 | 1 | 1 |
| 1 | 2 | 261 | 1 | 1 | 1 | 1 | 2 | 2 |

|   |   |     |   |   |   |   |   |   |
|---|---|-----|---|---|---|---|---|---|
| 2 | 3 | 158 | 3 | 1 | 1 | 3 | 1 | 1 |
| 2 | 3 | 257 | 4 | 4 | 4 | 1 | 3 | 2 |
| 3 | 3 | 287 | 3 | 3 | 3 | 3 | 3 | 3 |
| 2 | 2 | 212 | 3 | 2 | 1 | 1 | 3 | 2 |
| 3 | 3 | 324 | 4 | 4 | 1 | 1 | 4 | 4 |
| 1 | 1 | 292 | 1 | 1 | 1 | 1 | 1 | 1 |
| 1 | 2 | 247 | 2 | 1 | 1 | 1 | 2 | 2 |
| 2 | 2 | 256 | 2 | 4 | 1 | 1 | 2 | 1 |
| 1 | 1 | 298 | 1 | 1 | 1 | 1 | 1 | 1 |
| 1 | 1 | 223 | 4 | 4 | 4 | 4 | 4 | 4 |
| 4 | 4 | 243 | 1 | 1 | 1 | 1 | 1 | 1 |
| 5 | 4 | 331 | 1 | 1 | 1 | 1 | 1 | 1 |
| 1 | 1 | 237 | 2 | 2 | 2 | 2 | 2 | 2 |
| 2 | 2 | 218 | 3 | 1 | 1 | 1 | 3 | 3 |
| 4 | 2 | 259 | 3 | 2 | 2 | 2 | 2 | 2 |
| 1 | 1 | 248 | 1 | 1 | 1 | 1 | 1 | 1 |
| 3 | 3 | 235 | 3 | 3 | 1 | 1 | 1 | 1 |
| 3 | 3 | 262 | 1 | 2 | 1 | 2 | 1 | 2 |
| 1 | 2 | 215 | 2 | 2 | 2 | 2 | 2 | 2 |
| 1 | 1 | 230 | 2 | 1 | 3 | 1 | 2 | 1 |
| 2 | 2 | 223 | 3 | 3 | 2 | 2 | 2 | 2 |
| 2 | 2 | 179 | 1 | 1 | 1 | 1 | 1 | 1 |
| 2 | 4 | 305 | 2 | 2 | 1 | 2 | 2 | 1 |
| 2 | 3 | 212 | 1 | 3 | 1 | 2 | 2 | 1 |
| 3 | 2 | 274 | 1 | 2 | 2 | 2 | 3 | 2 |
| 4 | 2 | 180 | 1 | 1 | 4 | 4 | 2 | 2 |
| 1 | 1 | 227 | 1 | 1 | 1 | 1 | 1 | 1 |
| 2 | 3 | 331 | 2 | 2 | 1 | 1 | 1 | 1 |
| 5 | 5 | 213 | 4 | 4 | 4 | 4 | 4 | 4 |
| 4 | 4 | 253 | 1 | 1 | 1 | 1 | 2 | 1 |
| 3 | 3 | 326 | 2 | 2 | 2 | 2 | 2 | 2 |
| 1 | 1 | 230 | 4 | 1 | 1 | 1 | 1 | 1 |
| 2 | 3 | 296 | 3 | 3 | 2 | 2 | 3 | 3 |
| 2 | 2 | 237 | 1 | 1 | 1 | 1 | 1 | 1 |
| 1 | 1 | 192 | 1 | 1 | 1 | 1 | 1 | 1 |
| 2 | 2 | 263 | 2 | 2 | 2 | 1 | 2 | 1 |
| 1 | 1 | 231 | 1 | 1 | 1 | 1 | 1 | 1 |
| 2 | 2 | 261 | 3 | 2 | 3 | 2 | 2 | 2 |
| 4 | 4 | 198 | 3 | 3 | 3 | 3 | 3 | 3 |
| 2 | 2 | 254 | 2 | 1 | 1 | 2 | 1 | 3 |
| 2 | 2 | 301 | 2 | 2 | 2 | 1 | 3 | 3 |
| 1 | 1 | 277 | 3 | 4 | 1 | 1 | 2 | 2 |
| 3 | 4 | 218 | 1 | 1 | 1 | 1 | 1 | 3 |
| 2 | 2 | 266 | 1 | 1 | 1 | 1 | 2 | 2 |
| 1 | 3 | 171 | 2 | 2 | 1 | 1 | 1 | 1 |
| 4 | 2 | 220 | 2 | 1 | 1 | 1 | 2 | 2 |
| 2 | 3 | 265 | 2 | 3 | 3 | 2 | 4 | 4 |
| 2 | 2 | 209 | 2 | 3 | 1 | 1 | 1 | 1 |
| 3 | 3 | 246 | 3 | 2 | 2 | 2 | 1 | 2 |
| 2 | 3 | 231 | 2 | 2 | 2 | 2 | 2 | 2 |
| 2 | 2 | 231 | 2 | 2 | 2 | 2 | 2 | 2 |
| 3 | 3 | 240 | 1 | 3 | 1 | 1 | 4 | 4 |
| 2 | 2 | 221 | 3 | 3 | 1 | 2 | 3 | 3 |
| 1 | 4 | 185 | 1 | 4 | 2 | 3 | 2 | 2 |

|   |   |     |   |   |   |   |   |   |
|---|---|-----|---|---|---|---|---|---|
| 3 | 3 | 239 | 1 | 1 | 2 | 2 | 2 | 2 |
| 4 | 3 | 266 | 1 | 1 | 4 | 4 | 4 | 4 |
| 2 | 3 | 174 | 1 | 1 | 1 | 1 | 1 | 1 |
| 3 | 2 | 174 | 4 | 4 | 3 | 2 | 3 | 2 |
| 2 | 2 | 179 | 2 | 2 | 2 | 2 | 2 | 2 |
| 2 | 2 | 195 | 2 | 2 | 1 | 2 | 1 | 1 |
| 3 | 3 | 262 | 1 | 2 | 3 | 1 | 3 | 1 |
| 4 | 4 | 271 | 2 | 3 | 1 | 2 | 2 | 1 |
| 3 | 3 | 209 | 3 | 1 | 2 | 1 | 2 | 1 |
| 2 | 2 | 257 | 2 | 2 | 2 | 2 | 1 | 1 |
| 1 | 3 | 269 | 3 | 3 | 2 | 2 | 3 | 3 |
| 1 | 1 | 270 | 1 | 2 | 1 | 1 | 1 | 1 |
| 3 | 3 | 203 | 1 | 1 | 1 | 2 | 3 | 2 |
| 1 | 1 | 220 | 1 | 1 | 1 | 1 | 1 | 1 |
| 1 | 2 | 283 | 1 | 1 | 1 | 1 | 2 | 2 |
| 1 | 1 | 254 | 3 | 2 | 2 | 2 | 3 | 3 |
| 2 | 2 | 198 | 2 | 2 | 1 | 1 | 3 | 1 |
| 2 | 2 | 234 | 2 | 2 | 2 | 2 | 2 | 2 |
| 1 | 1 | 208 | 2 | 1 | 1 | 1 | 1 | 1 |
| 1 | 1 | 219 | 2 | 2 | 1 | 4 | 4 | 1 |
| 2 | 2 | 324 | 3 | 2 | 2 | 2 | 2 | 2 |
| 4 | 4 | 225 | 3 | 2 | 2 | 2 | 3 | 2 |
| 5 | 4 | 252 | 3 | 3 | 3 | 3 | 3 | 3 |
| 3 | 3 | 260 | 2 | 2 | 2 | 4 | 3 | 2 |
| 1 | 1 | 253 | 2 | 2 | 1 | 2 | 2 | 2 |
| 5 | 1 | 230 | 2 | 1 | 1 | 1 | 1 | 2 |
| 3 | 3 | 236 | 1 | 3 | 2 | 2 | 2 | 2 |
| 2 | 3 | 262 | 2 | 3 | 1 | 2 | 3 | 3 |
| 1 | 2 | 215 | 3 | 3 | 3 | 2 | 3 | 3 |
| 1 | 1 | 239 | 3 | 3 | 2 | 2 | 2 | 3 |
| 2 | 2 | 271 | 4 | 4 | 4 | 4 | 4 | 4 |
| 3 | 3 | 202 | 2 | 2 | 2 | 2 | 2 | 2 |
| 4 | 4 | 280 | 2 | 2 | 2 | 2 | 2 | 2 |
| 4 | 4 | 315 | 3 | 3 | 3 | 3 | 3 | 3 |
| 2 | 2 | 225 | 2 | 2 | 1 | 1 | 1 | 1 |
| 3 | 1 | 319 | 4 | 4 | 4 | 4 | 4 | 4 |
| 5 | 5 | 237 | 4 | 4 | 4 | 4 | 4 | 4 |
| 1 | 1 | 213 | 2 | 2 | 2 | 2 | 2 | 2 |
| 5 | 5 | 262 | 3 | 3 | 3 | 3 | 3 | 3 |
| 1 | 1 | 258 | 1 | 1 | 1 | 1 | 1 | 1 |
| 4 | 4 | 234 | 3 | 3 | 3 | 3 | 3 | 3 |
| 3 | 3 | 201 | 2 | 2 | 2 | 3 | 4 | 2 |
| 1 | 1 | 268 | 1 | 1 | 1 | 1 | 1 | 1 |
| 2 | 2 | 269 | 1 | 1 | 1 | 1 | 1 | 1 |
| 4 | 4 | 284 | 2 | 2 | 2 | 2 | 2 | 2 |
| 3 | 3 | 281 | 3 | 2 | 1 | 2 | 3 | 1 |
| 2 | 1 | 258 | 3 | 2 | 1 | 1 | 1 | 1 |
| 2 | 2 | 228 | 3 | 3 | 1 | 2 | 2 | 2 |
| 4 | 2 | 307 | 2 | 2 | 2 | 1 | 2 | 2 |
| 2 | 2 | 290 | 4 | 4 | 4 | 4 | 4 | 4 |
| 2 | 2 | 300 | 2 | 2 | 2 | 2 | 2 | 2 |
| 3 | 3 | 325 | 2 | 1 | 1 | 2 | 1 | 2 |
| 1 | 1 | 270 | 1 | 1 | 1 | 1 | 1 | 1 |
| 1 | 1 | 237 | 2 | 2 | 2 | 2 | 1 | 1 |

|   |   |     |   |   |   |   |   |   |
|---|---|-----|---|---|---|---|---|---|
| 1 | 1 | 292 | 1 | 1 | 1 | 1 | 1 | 1 |
| 1 | 1 | 325 | 1 | 1 | 4 | 1 | 1 | 4 |
| 1 | 1 | 255 | 1 | 1 | 1 | 1 | 1 | 1 |
| 4 | 2 | 293 | 1 | 2 | 2 | 2 | 1 | 1 |
| 1 | 1 | 251 | 2 | 1 | 3 | 2 | 1 | 3 |
| 1 | 1 | 306 | 1 | 1 | 1 | 1 | 1 | 1 |
| 2 | 1 | 280 | 1 | 1 | 1 | 1 | 1 | 1 |
| 1 | 1 | 195 | 1 | 3 | 1 | 1 | 1 | 1 |
| 1 | 1 | 252 | 2 | 1 | 1 | 1 | 2 | 1 |
| 1 | 1 | 263 | 2 | 2 | 2 | 2 | 3 | 2 |
| 1 | 1 | 253 | 2 | 2 | 2 | 2 | 2 | 1 |
| 5 | 4 | 192 | 3 | 3 | 2 | 3 | 2 | 2 |
| 2 | 2 | 234 | 3 | 2 | 1 | 1 | 1 | 1 |
| 2 | 2 | 284 | 2 | 2 | 2 | 2 | 3 | 2 |
| 2 | 2 | 254 | 2 | 2 | 2 | 1 | 1 | 2 |
| 3 | 3 | 288 | 3 | 3 | 2 | 1 | 4 | 2 |
| 2 | 3 | 319 | 2 | 2 | 2 | 2 | 2 | 2 |
| 1 | 3 | 188 | 3 | 2 | 2 | 1 | 2 | 1 |
| 2 | 2 | 217 | 2 | 1 | 1 | 1 | 2 | 1 |
| 1 | 1 | 249 | 2 | 3 | 4 | 2 | 1 | 1 |
| 1 | 1 | 262 | 2 | 1 | 1 | 1 | 1 | 2 |
| 4 | 3 | 210 | 1 | 1 | 1 | 1 | 1 | 1 |
| 3 | 3 | 221 | 3 | 3 | 3 | 3 | 3 | 3 |
| 3 | 3 | 270 | 3 | 3 | 3 | 3 | 4 | 3 |
| 5 | 5 | 280 | 2 | 2 | 3 | 2 | 4 | 1 |
| 3 | 3 | 137 | 2 | 4 | 2 | 2 | 3 | 1 |
| 3 | 3 | 264 | 3 | 2 | 2 | 2 | 2 | 2 |
| 1 | 1 | 243 | 1 | 1 | 1 | 2 | 2 | 2 |
| 1 | 1 | 308 | 4 | 4 | 4 | 2 | 2 | 1 |
| 3 | 4 | 267 | 4 | 4 | 4 | 3 | 4 | 4 |
| 2 | 2 | 285 | 1 | 1 | 1 | 1 | 1 | 1 |
| 1 | 2 | 328 | 1 | 1 | 1 | 1 | 2 | 1 |
| 5 | 1 | 284 | 4 | 4 | 4 | 4 | 4 | 4 |
| 2 | 2 | 253 | 2 | 2 | 1 | 2 | 2 | 1 |
| 2 | 2 | 300 | 1 | 1 | 1 | 1 | 1 | 1 |
| 1 | 1 | 263 | 2 | 2 | 2 | 2 | 3 | 2 |
| 1 | 1 | 256 | 2 | 1 | 1 | 1 | 1 | 1 |
| 4 | 4 | 247 | 2 | 2 | 2 | 2 | 2 | 2 |
| 1 | 1 | 276 | 1 | 1 | 1 | 1 | 1 | 1 |
| 2 | 2 | 244 | 2 | 2 | 2 | 1 | 2 | 2 |
| 5 | 5 | 302 | 4 | 4 | 4 | 4 | 4 | 4 |
| 3 | 3 | 226 | 1 | 1 | 1 | 1 | 1 | 1 |
| 1 | 2 | 216 | 2 | 1 | 1 | 1 | 1 | 1 |
| 3 | 3 | 239 | 1 | 2 | 2 | 1 | 2 | 1 |
| 1 | 1 | 241 | 1 | 1 | 1 | 1 | 2 | 2 |
| 3 | 3 | 255 | 4 | 4 | 4 | 4 | 4 | 4 |
| 1 | 1 | 203 | 3 | 4 | 1 | 3 | 4 | 4 |
| 1 | 1 | 249 | 3 | 3 | 3 | 1 | 2 | 2 |
| 1 | 3 | 280 | 2 | 2 | 1 | 2 | 2 | 1 |
| 3 | 3 | 305 | 1 | 3 | 2 | 3 | 2 | 2 |
| 3 | 4 | 322 | 4 | 4 | 3 | 2 | 4 | 4 |
| 2 | 2 | 308 | 1 | 1 | 1 | 1 | 2 | 1 |
| 2 | 2 | 269 | 1 | 1 | 1 | 1 | 1 | 1 |
| 1 | 1 | 273 | 1 | 2 | 1 | 2 | 1 | 1 |

|   |   |     |   |   |   |   |   |   |
|---|---|-----|---|---|---|---|---|---|
| 1 | 5 | 205 | 1 | 4 | 1 | 1 | 4 | 1 |
| 1 | 1 | 309 | 4 | 4 | 4 | 4 | 4 | 3 |
| 1 | 1 | 227 | 2 | 2 | 2 | 2 | 2 | 2 |
| 1 | 1 | 292 | 1 | 1 | 1 | 1 | 3 | 2 |
| 3 | 3 | 264 | 4 | 2 | 2 | 1 | 4 | 4 |
| 1 | 1 | 286 | 1 | 3 | 1 | 1 | 2 | 1 |
| 2 | 1 | 259 | 2 | 1 | 2 | 1 | 3 | 1 |
| 5 | 4 | 223 | 3 | 3 | 3 | 3 | 3 | 3 |
| 5 | 5 | 313 | 4 | 4 | 4 | 4 | 4 | 4 |
| 1 | 1 | 214 | 4 | 1 | 1 | 1 | 1 | 1 |
| 2 | 3 | 247 | 3 | 2 | 1 | 1 | 1 | 1 |
| 4 | 3 | 272 | 3 | 3 | 3 | 3 | 3 | 3 |
| 1 | 1 | 272 | 1 | 1 | 1 | 1 | 1 | 1 |
| 3 | 3 | 205 | 1 | 1 | 1 | 1 | 1 | 1 |
| 1 | 2 | 190 | 2 | 2 | 1 | 1 | 1 | 1 |
| 1 | 1 | 261 | 3 | 2 | 2 | 3 | 2 | 2 |
| 1 | 1 | 243 | 3 | 4 | 1 | 1 | 2 | 1 |
| 3 | 3 | 274 | 1 | 1 | 1 | 1 | 1 | 1 |
| 4 | 3 | 298 | 1 | 2 | 2 | 1 | 3 | 2 |
| 1 | 1 | 308 | 3 | 2 | 1 | 2 | 2 | 2 |
| 2 | 3 | 207 | 2 | 3 | 3 | 2 | 2 | 3 |
| 2 | 2 | 307 | 1 | 1 | 1 | 1 | 1 | 1 |
| 1 | 1 | 300 | 1 | 1 | 1 | 1 | 1 | 1 |
| 1 | 1 | 222 | 2 | 3 | 1 | 1 | 2 | 2 |
| 3 | 3 | 269 | 1 | 1 | 1 | 1 | 1 | 1 |
| 1 | 1 | 241 | 1 | 2 | 2 | 1 | 1 | 4 |
| 1 | 1 | 212 | 1 | 2 | 1 | 1 | 1 | 1 |
| 2 | 3 | 321 | 2 | 2 | 1 | 1 | 1 | 1 |
| 1 | 1 | 264 | 1 | 1 | 1 | 1 | 1 | 2 |
| 3 | 3 | 310 | 3 | 2 | 1 | 2 | 2 | 2 |
| 3 | 3 | 196 | 2 | 1 | 2 | 1 | 4 | 4 |
| 1 | 1 | 199 | 2 | 2 | 3 | 1 | 4 | 2 |
| 2 | 2 | 217 | 1 | 1 | 1 | 1 | 1 | 1 |
| 1 | 1 | 316 | 2 | 2 | 1 | 1 | 1 | 2 |
| 4 | 3 | 233 | 3 | 2 | 1 | 2 | 3 | 3 |
| 2 | 2 | 290 | 3 | 2 | 3 | 2 | 3 | 1 |
| 3 | 3 | 255 | 2 | 3 | 1 | 1 | 2 | 2 |
| 1 | 1 | 308 | 1 | 1 | 1 | 1 | 1 | 1 |
| 2 | 2 | 287 | 4 | 3 | 1 | 1 | 1 | 1 |
| 1 | 1 | 332 | 2 | 3 | 2 | 1 | 2 | 2 |
| 2 | 2 | 213 | 1 | 1 | 1 | 1 | 1 | 2 |
| 1 | 1 | 253 | 1 | 1 | 1 | 1 | 1 | 1 |
| 2 | 2 | 281 | 1 | 1 | 1 | 1 | 4 | 1 |
| 1 | 1 | 258 | 2 | 2 | 1 | 1 | 1 | 2 |
| 3 | 3 | 316 | 1 | 2 | 1 | 1 | 1 | 1 |
| 2 | 2 | 203 | 1 | 4 | 1 | 1 | 1 | 1 |
| 1 | 1 | 320 | 1 | 4 | 1 | 1 | 4 | 1 |
| 3 | 1 | 221 | 1 | 2 | 1 | 2 | 2 | 2 |
| 2 | 3 | 307 | 3 | 3 | 3 | 2 | 3 | 2 |
| 1 | 1 | 334 | 1 | 2 | 2 | 4 | 2 | 3 |
| 3 | 2 | 239 | 3 | 3 | 3 | 3 | 3 | 3 |
| 1 | 1 | 210 | 1 | 4 | 1 | 1 | 1 | 1 |
| 1 | 1 | 272 | 1 | 1 | 1 | 1 | 1 | 1 |
| 2 | 2 | 280 | 3 | 3 | 1 | 2 | 4 | 4 |

|   |   |     |   |   |   |   |   |   |
|---|---|-----|---|---|---|---|---|---|
| 3 | 3 | 210 | 1 | 3 | 3 | 3 | 3 | 3 |
| 1 | 1 | 246 | 1 | 3 | 1 | 2 | 2 | 1 |
| 1 | 2 | 302 | 1 | 2 | 1 | 1 | 1 | 1 |
| 3 | 3 | 220 | 2 | 2 | 2 | 2 | 2 | 2 |
| 1 | 2 | 212 | 4 | 4 | 4 | 4 | 4 | 4 |
| 1 | 1 | 286 | 1 | 1 | 1 | 1 | 1 | 1 |
| 1 | 1 | 322 | 4 | 4 | 4 | 1 | 4 | 4 |
| 2 | 2 | 341 | 2 | 1 | 3 | 1 | 3 | 1 |
| 2 | 2 | 245 | 1 | 2 | 2 | 4 | 1 | 4 |
| 1 | 1 | 334 | 1 | 1 | 1 | 1 | 1 | 1 |
| 1 | 1 | 180 | 1 | 1 | 1 | 1 | 1 | 1 |
| 2 | 2 | 269 | 3 | 2 | 2 | 1 | 3 | 1 |
| 1 | 1 | 262 | 1 | 1 | 1 | 1 | 1 | 1 |
| 4 | 4 | 269 | 3 | 4 | 4 | 3 | 3 | 3 |
| 1 | 2 | 317 | 2 | 2 | 2 | 2 | 2 | 2 |
| 1 | 1 | 271 | 2 | 2 | 4 | 2 | 3 | 4 |
| 1 | 2 | 224 | 2 | 2 | 2 | 2 | 2 | 2 |
| 1 | 1 | 267 | 1 | 1 | 1 | 1 | 1 | 1 |
| 1 | 1 | 213 | 1 | 1 | 3 | 1 | 1 | 1 |
| 3 | 3 | 274 | 2 | 2 | 2 | 2 | 2 | 1 |
| 1 | 1 | 336 | 1 | 1 | 1 | 1 | 1 | 1 |
| 3 | 3 | 207 | 3 | 3 | 3 | 3 | 3 | 3 |
| 5 | 5 | 225 | 1 | 1 | 1 | 1 | 1 | 1 |
| 1 | 1 | 226 | 4 | 1 | 1 | 1 | 1 | 1 |
| 2 | 2 | 217 | 2 | 2 | 2 | 2 | 2 | 2 |
| 4 | 2 | 262 | 3 | 3 | 3 | 3 | 3 | 2 |
| 2 | 1 | 242 | 3 | 3 | 3 | 3 | 3 | 3 |
| 2 | 2 | 238 | 2 | 1 | 1 | 1 | 2 | 1 |
| 2 | 2 | 241 | 2 | 1 | 1 | 1 | 4 | 1 |
| 2 | 1 | 219 | 1 | 3 | 1 | 1 | 1 | 2 |
| 2 | 2 | 268 | 1 | 2 | 2 | 2 | 1 | 1 |
| 3 | 3 | 206 | 3 | 3 | 2 | 1 | 2 | 2 |
| 2 | 2 | 212 | 1 | 1 | 1 | 1 | 1 | 2 |
| 3 | 3 | 249 | 2 | 2 | 1 | 1 | 2 | 2 |
| 3 | 3 | 244 | 2 | 2 | 1 | 2 | 2 | 1 |
| 2 | 2 | 211 | 2 | 2 | 2 | 1 | 2 | 3 |
| 2 | 2 | 253 | 2 | 2 | 2 | 2 | 2 | 2 |
| 1 | 1 | 319 | 1 | 1 | 1 | 1 | 1 | 2 |
| 3 | 3 | 239 | 2 | 2 | 1 | 2 | 2 | 1 |
| 3 | 3 | 224 | 3 | 3 | 3 | 3 | 3 | 3 |
| 5 | 5 | 179 | 2 | 4 | 2 | 1 | 2 | 3 |
| 2 | 2 | 273 | 1 | 1 | 2 | 1 | 1 | 1 |
| 2 | 2 | 289 | 2 | 1 | 1 | 1 | 2 | 1 |
| 2 | 2 | 194 | 2 | 3 | 2 | 3 | 3 | 2 |
| 2 | 3 | 201 | 4 | 4 | 4 | 4 | 4 | 4 |
| 1 | 1 | 342 | 1 | 1 | 1 | 1 | 1 | 1 |
| 2 | 3 | 201 | 2 | 2 | 2 | 2 | 2 | 2 |
| 2 | 2 | 275 | 2 | 2 | 2 | 2 | 2 | 2 |
| 4 | 2 | 259 | 2 | 2 | 1 | 1 | 1 | 1 |
| 1 | 1 | 245 | 1 | 1 | 1 | 1 | 1 | 1 |
| 1 | 1 | 265 | 1 | 1 | 1 | 1 | 1 | 1 |
| 2 | 2 | 256 | 1 | 1 | 1 | 1 | 1 | 1 |
| 3 | 3 | 210 | 2 | 2 | 2 | 2 | 2 | 2 |
| 2 | 2 | 243 | 3 | 4 | 2 | 4 | 3 | 2 |

|   |   |     |   |   |   |   |   |   |
|---|---|-----|---|---|---|---|---|---|
| 2 | 2 | 249 | 2 | 2 | 1 | 1 | 1 | 1 |
| 2 | 2 | 220 | 3 | 3 | 3 | 3 | 2 | 2 |
| 1 | 3 | 211 | 3 | 2 | 2 | 1 | 3 | 2 |
| 2 | 2 | 265 | 1 | 1 | 1 | 1 | 1 | 1 |
| 4 | 3 | 182 | 3 | 3 | 2 | 2 | 3 | 3 |
| 1 | 1 | 211 | 4 | 1 | 1 | 1 | 4 | 3 |
| 2 | 2 | 213 | 3 | 2 | 1 | 1 | 2 | 2 |
| 3 | 3 | 206 | 4 | 3 | 2 | 2 | 2 | 3 |
| 1 | 1 | 301 | 2 | 1 | 2 | 1 | 2 | 2 |
| 1 | 1 | 304 | 1 | 1 | 1 | 1 | 1 | 1 |
| 2 | 2 | 256 | 1 | 1 | 1 | 1 | 1 | 1 |
| 1 | 1 | 160 | 4 | 4 | 4 | 4 | 4 | 4 |
| 2 | 2 | 260 | 1 | 2 | 2 | 1 | 2 | 1 |
| 3 | 3 | 199 | 2 | 2 | 2 | 2 | 3 | 2 |
| 1 | 1 | 284 | 1 | 1 | 1 | 1 | 4 | 1 |
| 1 | 5 | 207 | 3 | 3 | 4 | 4 | 4 | 3 |
| 2 | 2 | 260 | 2 | 2 | 1 | 1 | 1 | 1 |
| 3 | 3 | 195 | 3 | 4 | 3 | 3 | 4 | 2 |
| 2 | 2 | 245 | 2 | 2 | 2 | 2 | 3 | 2 |
| 4 | 4 | 143 | 1 | 1 | 1 | 1 | 1 | 1 |
| 5 | 2 | 250 | 2 | 2 | 2 | 1 | 1 | 1 |
| 3 | 3 | 213 | 3 | 3 | 3 | 3 | 3 | 3 |
| 2 | 2 | 234 | 3 | 3 | 2 | 2 | 3 | 1 |
| 4 | 4 | 237 | 3 | 3 | 4 | 3 | 2 | 4 |
| 2 | 2 | 256 | 3 | 2 | 4 | 2 | 2 | 4 |
| 2 | 2 | 227 | 2 | 1 | 1 | 2 | 2 | 2 |
| 3 | 3 | 211 | 1 | 1 | 1 | 1 | 1 | 1 |
| 5 | 5 | 142 | 4 | 2 | 2 | 1 | 4 | 2 |
| 1 | 4 | 195 | 4 | 2 | 2 | 2 | 3 | 2 |
| 2 | 2 | 248 | 2 | 2 | 3 | 3 | 2 | 1 |
| 1 | 1 | 248 | 2 | 1 | 1 | 1 | 2 | 2 |
| 2 | 2 | 249 | 2 | 2 | 1 | 2 | 2 | 2 |
| 3 | 3 | 225 | 3 | 2 | 2 | 2 | 2 | 2 |
| 3 | 3 | 291 | 3 | 3 | 3 | 2 | 2 | 2 |
| 2 | 2 | 224 | 4 | 1 | 1 | 4 | 4 | 4 |
| 2 | 1 | 252 | 3 | 3 | 4 | 3 | 2 | 4 |
| 2 | 2 | 242 | 2 | 2 | 2 | 1 | 2 | 1 |
| 4 | 4 | 217 | 2 | 1 | 1 | 1 | 2 | 1 |
| 2 | 3 | 217 | 2 | 2 | 2 | 1 | 2 | 1 |
| 2 | 2 | 194 | 1 | 1 | 1 | 1 | 1 | 1 |
| 1 | 1 | 314 | 3 | 3 | 3 | 3 | 3 | 3 |
| 2 | 2 | 251 | 1 | 1 | 1 | 1 | 1 | 1 |
| 3 | 1 | 252 | 1 | 1 | 1 | 1 | 1 | 1 |
| 1 | 3 | 232 | 1 | 1 | 1 | 2 | 2 | 2 |
| 2 | 2 | 257 | 2 | 1 | 1 | 2 | 1 | 1 |
| 2 | 3 | 205 | 2 | 1 | 1 | 1 | 2 | 1 |
| 2 | 2 | 251 | 3 | 2 | 2 | 2 | 3 | 3 |
| 3 | 3 | 210 | 2 | 1 | 1 | 1 | 2 | 2 |
| 2 | 3 | 217 | 3 | 1 | 2 | 1 | 4 | 1 |
| 2 | 4 | 235 | 1 | 1 | 2 | 3 | 2 | 4 |
| 2 | 2 | 270 | 1 | 1 | 1 | 1 | 1 | 1 |
| 1 | 1 | 303 | 1 | 1 | 1 | 1 | 1 | 1 |
| 1 | 1 | 274 | 1 | 1 | 1 | 1 | 1 | 1 |
| 2 | 2 | 285 | 1 | 1 | 1 | 1 | 1 | 2 |

|   |   |     |   |   |   |   |   |   |
|---|---|-----|---|---|---|---|---|---|
| 2 | 2 | 216 | 2 | 2 | 1 | 1 | 2 | 2 |
| 2 | 2 | 253 | 2 | 2 | 2 | 2 | 2 | 3 |
| 3 | 2 | 241 | 2 | 2 | 2 | 2 | 2 | 2 |
| 3 | 2 | 244 | 1 | 1 | 1 | 1 | 1 | 1 |
| 1 | 2 | 228 | 3 | 2 | 2 | 1 | 2 | 2 |
| 2 | 3 | 240 | 1 | 2 | 1 | 2 | 1 | 2 |
| 5 | 2 | 233 | 1 | 1 | 1 | 1 | 1 | 1 |
| 1 | 1 | 287 | 4 | 4 | 4 | 2 | 3 | 3 |
| 1 | 2 | 276 | 2 | 2 | 1 | 2 | 2 | 2 |
| 2 | 1 | 278 | 2 | 2 | 3 | 1 | 3 | 2 |
| 1 | 1 | 307 | 2 | 2 | 3 | 1 | 3 | 2 |
| 1 | 1 | 290 | 2 | 3 | 1 | 2 | 3 | 3 |
| 2 | 2 | 252 | 1 | 2 | 2 | 2 | 2 | 2 |
| 3 | 3 | 236 | 1 | 2 | 3 | 1 | 2 | 1 |
| 1 | 1 | 314 | 1 | 2 | 1 | 1 | 4 | 1 |
| 2 | 2 | 241 | 1 | 1 | 1 | 1 | 1 | 1 |
| 1 | 1 | 314 | 1 | 1 | 1 | 1 | 1 | 1 |
| 2 | 2 | 234 | 2 | 1 | 2 | 1 | 1 | 1 |
| 1 | 1 | 230 | 3 | 3 | 3 | 2 | 2 | 2 |
| 3 | 4 | 169 | 2 | 1 | 1 | 2 | 3 | 2 |
| 1 | 1 | 285 | 1 | 2 | 1 | 2 | 2 | 1 |
| 1 | 3 | 230 | 3 | 2 | 2 | 2 | 2 | 2 |
| 1 | 1 | 306 | 1 | 1 | 1 | 1 | 1 | 1 |
| 1 | 1 | 317 | 1 | 1 | 1 | 1 | 1 | 1 |
| 1 | 3 | 329 | 1 | 1 | 1 | 1 | 4 | 1 |
| 4 | 4 | 180 | 1 | 1 | 1 | 1 | 3 | 3 |
| 2 | 1 | 299 | 1 | 1 | 1 | 1 | 1 | 1 |
| 1 | 1 | 317 | 1 | 1 | 1 | 1 | 4 | 1 |
| 3 | 2 | 254 | 1 | 1 | 1 | 1 | 1 | 2 |
| 1 | 1 | 322 | 2 | 2 | 1 | 1 | 1 | 1 |
| 1 | 2 | 258 | 1 | 1 | 1 | 1 | 3 | 2 |
| 2 | 1 | 275 | 2 | 2 | 1 | 2 | 1 | 1 |
| 4 | 3 | 205 | 2 | 2 | 2 | 2 | 4 | 2 |
| 1 | 1 | 312 | 2 | 1 | 1 | 1 | 1 | 1 |
| 1 | 2 | 259 | 1 | 1 | 1 | 1 | 4 | 1 |
| 1 | 2 | 280 | 2 | 1 | 1 | 1 | 1 | 1 |
| 1 | 1 | 240 | 2 | 2 | 2 | 1 | 1 | 2 |
| 4 | 5 | 110 | 1 | 1 | 1 | 1 | 1 | 1 |
| 3 | 3 | 204 | 4 | 4 | 4 | 4 | 4 | 1 |
| 1 | 1 | 286 | 2 | 1 | 1 | 1 | 1 | 1 |
| 1 | 1 | 322 | 1 | 1 | 1 | 1 | 1 | 1 |
| 3 | 3 | 236 | 3 | 3 | 1 | 2 | 2 | 2 |
| 3 | 3 | 210 | 1 | 1 | 1 | 1 | 1 | 1 |
| 1 | 2 | 253 | 1 | 1 | 1 | 1 | 1 | 1 |
| 2 | 3 | 200 | 2 | 3 | 2 | 2 | 2 | 3 |
| 1 | 2 | 228 | 2 | 2 | 1 | 1 | 2 | 1 |
| 1 | 1 | 260 | 2 | 3 | 1 | 3 | 4 | 1 |
| 3 | 3 | 229 | 2 | 1 | 3 | 1 | 2 | 1 |
| 1 | 2 | 284 | 1 | 1 | 1 | 1 | 1 | 1 |
| 1 | 3 | 246 | 1 | 2 | 1 | 2 | 1 | 1 |
| 1 | 1 | 263 | 1 | 1 | 1 | 1 | 2 | 1 |
| 1 | 1 | 319 | 1 | 2 | 1 | 1 | 1 | 1 |
| 1 | 3 | 220 | 1 | 2 | 2 | 2 | 3 | 2 |
| 1 | 1 | 301 | 3 | 1 | 1 | 1 | 2 | 1 |



|   |   |     |   |   |   |   |   |   |
|---|---|-----|---|---|---|---|---|---|
| 1 | 1 | 237 | 4 | 3 | 2 | 2 | 3 | 2 |
| 3 | 2 | 274 | 1 | 2 | 3 | 2 | 2 | 1 |
| 1 | 1 | 234 | 1 | 2 | 2 | 1 | 2 | 1 |
| 5 | 5 | 80  | 1 | 1 | 1 | 2 | 4 | 2 |
| 2 | 2 | 232 | 2 | 2 | 1 | 2 | 2 | 2 |
| 3 | 3 | 173 | 2 | 2 | 3 | 3 | 1 | 2 |
| 2 | 2 | 226 | 2 | 2 | 1 | 2 | 2 | 1 |
| 1 | 1 | 244 | 1 | 1 | 1 | 1 | 4 | 1 |
| 2 | 2 | 269 | 1 | 2 | 2 | 1 | 3 | 3 |
| 3 | 2 | 204 | 2 | 2 | 1 | 2 | 3 | 2 |
| 2 | 2 | 280 | 1 | 1 | 1 | 1 | 1 | 1 |
| 2 | 2 | 204 | 1 | 2 | 1 | 1 | 2 | 3 |
| 3 | 3 | 237 | 1 | 4 | 2 | 1 | 4 | 3 |
| 1 | 1 | 327 | 1 | 1 | 1 | 1 | 2 | 1 |
| 1 | 1 | 335 | 1 | 1 | 1 | 1 | 2 | 1 |
| 3 | 3 | 211 | 2 | 1 | 1 | 1 | 2 | 1 |
| 2 | 2 | 252 | 2 | 2 | 2 | 2 | 2 | 2 |
| 1 | 1 | 303 | 1 | 2 | 1 | 1 | 1 | 1 |
| 3 | 3 | 234 | 1 | 2 | 1 | 1 | 1 | 1 |
| 2 | 2 | 239 | 1 | 1 | 1 | 1 | 1 | 1 |
| 3 | 4 | 238 | 3 | 2 | 2 | 3 | 2 | 2 |
| 1 | 3 | 180 | 1 | 2 | 2 | 2 | 3 | 1 |
| 4 | 1 | 262 | 1 | 1 | 1 | 1 | 1 | 1 |
| 3 | 3 | 245 | 3 | 2 | 2 | 1 | 2 | 2 |
| 1 | 1 | 238 | 1 | 1 | 1 | 1 | 1 | 1 |
| 3 | 3 | 206 | 1 | 2 | 2 | 1 | 2 | 1 |
| 3 | 3 | 204 | 2 | 2 | 2 | 2 | 2 | 2 |
| 1 | 1 | 305 | 2 | 2 | 2 | 1 | 1 | 2 |
| 3 | 3 | 210 | 2 | 2 | 2 | 2 | 2 | 2 |
| 3 | 2 | 245 | 1 | 2 | 1 | 1 | 1 | 1 |
| 3 | 3 | 228 | 2 | 3 | 2 | 1 | 1 | 2 |
| 3 | 3 | 214 | 2 | 1 | 2 | 2 | 3 | 2 |
| 2 | 1 | 182 | 1 | 2 | 1 | 1 | 2 | 1 |
| 2 | 2 | 222 | 1 | 1 | 1 | 1 | 1 | 1 |
| 2 | 2 | 248 | 2 | 2 | 1 | 1 | 1 | 1 |
| 2 | 2 | 234 | 2 | 2 | 2 | 2 | 2 | 3 |
| 1 | 1 | 269 | 1 | 2 | 1 | 1 | 1 | 2 |
| 2 | 2 | 297 | 1 | 1 | 1 | 1 | 1 | 1 |
| 1 | 1 | 255 | 2 | 3 | 1 | 1 | 2 | 1 |
| 3 | 3 | 226 | 1 | 1 | 1 | 1 | 1 | 1 |
| 1 | 2 | 213 | 1 | 3 | 3 | 1 | 1 | 1 |
| 1 | 1 | 258 | 1 | 1 | 1 | 1 | 1 | 1 |
| 2 | 2 | 272 | 2 | 3 | 2 | 2 | 3 | 3 |
| 2 | 2 | 229 | 1 | 1 | 1 | 1 | 2 | 1 |
| 3 | 3 | 264 | 2 | 2 | 1 | 1 | 1 | 1 |
| 2 | 2 | 192 | 1 | 1 | 1 | 1 | 3 | 1 |
| 2 | 2 | 226 | 1 | 1 | 1 | 1 | 1 | 1 |
| 1 | 1 | 304 | 2 | 2 | 1 | 2 | 1 | 1 |
| 1 | 1 | 278 | 2 | 1 | 1 | 1 | 1 | 1 |
| 1 | 1 | 279 | 1 | 2 | 2 | 1 | 1 | 1 |
| 1 | 1 | 282 | 2 | 2 | 2 | 2 | 2 | 2 |
| 2 | 2 | 281 | 3 | 3 | 2 | 2 | 2 | 2 |
| 1 | 1 | 261 | 2 | 1 | 1 | 2 | 1 | 1 |
| 2 | 2 | 306 | 2 | 2 | 1 | 1 | 2 | 2 |

|   |   |     |   |   |   |   |   |   |
|---|---|-----|---|---|---|---|---|---|
| 2 | 3 | 262 | 2 | 2 | 2 | 2 | 2 | 2 |
| 2 | 2 | 249 | 2 | 2 | 2 | 2 | 2 | 2 |
| 1 | 2 | 273 | 2 | 2 | 1 | 1 | 2 | 2 |
| 1 | 1 | 250 | 2 | 4 | 4 | 4 | 4 | 4 |
| 1 | 1 | 312 | 1 | 1 | 1 | 1 | 1 | 1 |
| 2 | 2 | 304 | 2 | 2 | 1 | 1 | 2 | 2 |

[illegible]

|   |   |   |   |   |   |   |   |   |
|---|---|---|---|---|---|---|---|---|
| 1 | 3 | 4 | 3 | 3 | 3 | 3 | 2 | 2 |
| 1 | 2 | 4 | 1 | 2 | 2 | 2 | 2 | 1 |
| 2 | 4 | 2 | 3 | 2 | 3 | 2 | 3 | 4 |
| 2 | 2 | 2 | 2 | 2 | 2 | 2 | 2 | 2 |
| 4 | 4 | 4 | 4 | 2 | 2 | 2 | 2 | 2 |
| 1 | 1 | 1 | 1 | 1 | 1 | 1 | 1 | 1 |
| 3 | 1 | 1 | 1 | 1 | 1 | 1 | 1 | 1 |
| 1 | 1 | 1 | 1 | 1 | 1 | 1 | 1 | 1 |
| 1 | 3 | 4 | 4 | 3 | 1 | 1 | 3 | 2 |
| 1 | 1 | 2 | 1 | 1 | 1 | 2 | 3 | 1 |
| 1 | 2 | 3 | 1 | 1 | 2 | 2 | 2 | 1 |
| 2 | 2 | 3 | 1 | 2 | 1 | 2 | 1 | 2 |
| 1 | 1 | 1 | 1 | 1 | 1 | 1 | 1 | 1 |
| 1 | 1 | 1 | 1 | 1 | 1 | 1 | 1 | 1 |
| 1 | 1 | 1 | 1 | 1 | 1 | 1 | 1 | 1 |
| 1 | 1 | 1 | 1 | 1 | 1 | 1 | 1 | 1 |
| 1 | 1 | 1 | 1 | 1 | 1 | 1 | 1 | 1 |
| 1 | 1 | 1 | 1 | 1 | 1 | 1 | 1 | 1 |
| 1 | 2 | 2 | 1 | 1 | 1 | 1 | 3 | 1 |
| 1 | 2 | 3 | 2 | 3 | 3 | 2 | 2 | 2 |
| 1 | 3 | 3 | 2 | 2 | 3 | 2 | 3 | 2 |
| 2 | 3 | 4 | 2 | 3 | 3 | 2 | 3 | 2 |
| 1 | 3 | 3 | 4 | 2 | 2 | 1 | 4 | 3 |
| 2 | 2 | 2 | 2 | 2 | 2 | 2 | 1 | 2 |
| 1 | 1 | 1 | 1 | 1 | 1 | 1 | 1 | 1 |
| 1 | 2 | 4 | 4 | 2 | 2 | 2 | 1 | 3 |
| 1 | 1 | 2 | 1 | 1 | 1 | 1 | 2 | 1 |
| 1 | 2 | 4 | 3 | 2 | 2 | 2 | 2 | 1 |
| 1 | 2 | 4 | 4 | 3 | 2 | 2 | 2 | 2 |
| 1 | 1 | 1 | 1 | 1 | 1 | 1 | 1 | 1 |
| 2 | 3 | 4 | 2 | 3 | 3 | 2 | 1 | 2 |
| 1 | 4 | 4 | 1 | 1 | 4 | 4 | 1 | 2 |
| 1 | 3 | 4 | 2 | 2 | 2 | 2 | 2 | 3 |
| 1 | 1 | 2 | 2 | 2 | 2 | 1 | 2 | 1 |
| 2 | 2 | 3 | 3 | 3 | 2 | 2 | 2 | 1 |
| 1 | 1 | 1 | 1 | 1 | 1 | 1 | 1 | 1 |
| 2 | 2 | 2 | 1 | 2 | 4 | 2 | 4 | 1 |
| 2 | 3 | 3 | 1 | 1 | 1 | 2 | 1 | 2 |
| 1 | 1 | 1 | 1 | 1 | 1 | 1 | 1 | 1 |
| 1 | 1 | 1 | 1 | 1 | 1 | 1 | 1 | 1 |
| 2 | 2 | 3 | 3 | 3 | 3 | 3 | 2 | 2 |
| 2 | 2 | 3 | 3 | 2 | 3 | 3 | 2 | 2 |
| 1 | 1 | 4 | 4 | 4 | 4 | 3 | 3 | 2 |
| 1 | 2 | 1 | 1 | 1 | 1 | 1 | 2 | 1 |
| 3 | 1 | 4 | 3 | 4 | 4 | 4 | 4 | 3 |
| 2 | 2 | 2 | 2 | 2 | 2 | 2 | 2 | 2 |
| 2 | 2 | 2 | 1 | 1 | 1 | 1 | 1 | 1 |
| 1 | 4 | 4 | 1 | 4 | 1 | 2 | 1 | 1 |
| 1 | 1 | 1 | 1 | 1 | 1 | 1 | 1 | 1 |
| 1 | 1 | 2 | 1 | 1 | 1 | 1 | 2 | 1 |
| 2 | 2 | 2 | 2 | 2 | 2 | 3 | 2 | 2 |
| 2 | 1 | 3 | 1 | 1 | 1 | 1 | 1 | 1 |
| 1 | 1 | 1 | 1 | 1 | 1 | 1 | 1 | 1 |
| 2 | 2 | 4 | 2 | 2 | 2 | 2 | 2 | 2 |



|   |   |   |   |   |   |   |   |   |
|---|---|---|---|---|---|---|---|---|
| 1 | 1 | 3 | 1 | 1 | 1 | 1 | 2 | 1 |
| 1 | 1 | 2 | 1 | 1 | 2 | 1 | 2 | 1 |
| 1 | 1 | 2 | 1 | 4 | 1 | 1 | 1 | 1 |
| 1 | 1 | 3 | 2 | 1 | 2 | 2 | 1 | 1 |
| 2 | 2 | 2 | 1 | 1 | 2 | 2 | 2 | 2 |
| 1 | 2 | 2 | 1 | 2 | 1 | 1 | 1 | 1 |
| 1 | 2 | 2 | 1 | 1 | 1 | 1 | 1 | 1 |
| 1 | 2 | 2 | 1 | 1 | 1 | 1 | 2 | 1 |
| 4 | 4 | 4 | 4 | 4 | 4 | 4 | 4 | 4 |
| 2 | 3 | 4 | 1 | 4 | 3 | 3 | 2 | 3 |
| 1 | 1 | 4 | 1 | 1 | 1 | 1 | 4 | 1 |
| 2 | 2 | 4 | 3 | 2 | 2 | 4 | 1 | 4 |
| 2 | 2 | 2 | 1 | 1 | 1 | 1 | 2 | 1 |
| 1 | 1 | 2 | 1 | 1 | 3 | 1 | 3 | 1 |
| 1 | 2 | 3 | 1 | 2 | 1 | 1 | 1 | 1 |
| 1 | 2 | 4 | 1 | 1 | 1 | 1 | 2 | 1 |
| 1 | 1 | 3 | 1 | 2 | 1 | 1 | 3 | 1 |
| 1 | 1 | 3 | 2 | 1 | 2 | 2 | 2 | 1 |
| 1 | 1 | 1 | 2 | 3 | 1 | 2 | 3 | 2 |
| 1 | 1 | 1 | 1 | 1 | 1 | 1 | 1 | 1 |
| 1 | 2 | 2 | 1 | 1 | 1 | 1 | 1 | 1 |
| 2 | 3 | 4 | 1 | 1 | 2 | 2 | 1 | 2 |
| 2 | 2 | 4 | 1 | 2 | 1 | 2 | 4 | 2 |
| 1 | 1 | 1 | 2 | 2 | 1 | 1 | 1 | 1 |
| 2 | 2 | 4 | 3 | 1 | 1 | 1 | 1 | 1 |
| 1 | 2 | 1 | 1 | 2 | 1 | 1 | 1 | 1 |
| 3 | 3 | 2 | 1 | 2 | 2 | 2 | 1 | 3 |
| 3 | 3 | 4 | 3 | 4 | 4 | 4 | 4 | 4 |
| 1 | 2 | 4 | 4 | 3 | 1 | 1 | 1 | 2 |
| 4 | 1 | 1 | 1 | 1 | 1 | 1 | 1 | 1 |
| 1 | 1 | 3 | 2 | 2 | 1 | 2 | 1 | 2 |
| 4 | 1 | 2 | 1 | 1 | 3 | 2 | 2 | 1 |
| 1 | 2 | 1 | 1 | 1 | 1 | 1 | 1 | 1 |
| 2 | 4 | 4 | 4 | 3 | 2 | 3 | 1 | 3 |
| 1 | 2 | 4 | 2 | 2 | 2 | 2 | 1 | 2 |
| 2 | 2 | 3 | 3 | 2 | 4 | 2 | 2 | 1 |
| 2 | 2 | 1 | 1 | 2 | 1 | 1 | 1 | 1 |
| 2 | 2 | 4 | 3 | 2 | 2 | 3 | 4 | 4 |
| 1 | 2 | 2 | 1 | 1 | 2 | 2 | 2 | 1 |
| 4 | 4 | 4 | 3 | 3 | 3 | 2 | 3 | 2 |
| 2 | 2 | 2 | 2 | 2 | 2 | 2 | 4 | 2 |
| 2 | 2 | 2 | 2 | 2 | 2 | 2 | 2 | 2 |
| 4 | 4 | 4 | 4 | 4 | 4 | 4 | 2 | 1 |
| 1 | 1 | 1 | 1 | 1 | 1 | 1 | 1 | 1 |
| 2 | 2 | 3 | 2 | 2 | 3 | 2 | 2 | 2 |
| 2 | 2 | 2 | 1 | 2 | 2 | 2 | 1 | 1 |
| 1 | 1 | 1 | 1 | 1 | 1 | 1 | 1 | 1 |
| 1 | 1 | 1 | 1 | 1 | 1 | 1 | 1 | 1 |
| 1 | 1 | 1 | 1 | 1 | 1 | 1 | 1 | 1 |
| 2 | 3 | 4 | 1 | 1 | 1 | 1 | 4 | 1 |
| 1 | 4 | 1 | 1 | 1 | 2 | 1 | 2 | 1 |
| 1 | 1 | 1 | 1 | 1 | 1 | 1 | 1 | 1 |
| 1 | 1 | 1 | 1 | 1 | 1 | 1 | 1 | 1 |
| 1 | 3 | 4 | 1 | 3 | 2 | 2 | 2 | 2 |

|   |   |   |   |   |   |   |   |   |
|---|---|---|---|---|---|---|---|---|
| 1 | 1 | 2 | 2 | 1 | 1 | 1 | 4 | 1 |
| 1 | 4 | 4 | 1 | 4 | 4 | 1 | 4 | 4 |
| 1 | 2 | 3 | 1 | 1 | 1 | 2 | 1 | 1 |
| 1 | 1 | 2 | 1 | 1 | 1 | 1 | 1 | 1 |
| 2 | 2 | 4 | 2 | 2 | 2 | 2 | 2 | 2 |
| 1 | 1 | 1 | 1 | 1 | 1 | 1 | 1 | 1 |
| 4 | 4 | 4 | 4 | 4 | 4 | 4 | 4 | 4 |
| 1 | 3 | 2 | 2 | 2 | 2 | 2 | 1 | 2 |
| 2 | 2 | 3 | 1 | 2 | 2 | 2 | 1 | 2 |
| 2 | 3 | 3 | 4 | 2 | 3 | 3 | 2 | 2 |
| 4 | 4 | 4 | 1 | 4 | 4 | 4 | 2 | 4 |
| 2 | 3 | 4 | 1 | 3 | 4 | 3 | 4 | 1 |
| 1 | 3 | 2 | 2 | 2 | 2 | 2 | 1 | 2 |
| 2 | 1 | 1 | 1 | 2 | 1 | 1 | 2 | 1 |
| 1 | 2 | 4 | 1 | 4 | 4 | 2 | 3 | 1 |
| 2 | 2 | 2 | 2 | 2 | 2 | 2 | 2 | 1 |
| 2 | 2 | 2 | 2 | 2 | 2 | 2 | 2 | 2 |
| 1 | 1 | 1 | 1 | 1 | 1 | 1 | 1 | 1 |
| 1 | 1 | 2 | 2 | 1 | 1 | 1 | 2 | 1 |
| 1 | 4 | 3 | 2 | 3 | 4 | 4 | 3 | 4 |
| 1 | 2 | 1 | 1 | 2 | 2 | 2 | 2 | 1 |
| 3 | 3 | 3 | 1 | 3 | 2 | 2 | 3 | 1 |
| 4 | 2 | 3 | 1 | 1 | 1 | 1 | 4 | 1 |
| 1 | 4 | 4 | 2 | 1 | 2 | 2 | 1 | 1 |
| 2 | 2 | 2 | 2 | 2 | 2 | 2 | 2 | 1 |
| 3 | 4 | 4 | 4 | 2 | 2 | 2 | 2 | 3 |
| 1 | 1 | 2 | 1 | 1 | 1 | 1 | 1 | 1 |
| 1 | 1 | 4 | 1 | 1 | 1 | 1 | 1 | 1 |
| 1 | 2 | 4 | 4 | 2 | 3 | 2 | 2 | 1 |
| 4 | 2 | 2 | 2 | 2 | 2 | 2 | 2 | 2 |
| 3 | 3 | 3 | 3 | 3 | 3 | 3 | 3 | 3 |
| 3 | 1 | 2 | 1 | 4 | 4 | 3 | 1 | 3 |
| 2 | 3 | 4 | 4 | 4 | 4 | 4 | 3 | 3 |
| 2 | 2 | 2 | 2 | 2 | 2 | 2 | 2 | 2 |
| 3 | 1 | 3 | 1 | 2 | 2 | 2 | 1 | 1 |
| 1 | 3 | 4 | 1 | 2 | 2 | 2 | 2 | 1 |
| 2 | 1 | 2 | 1 | 1 | 1 | 1 | 2 | 1 |
| 3 | 4 | 1 | 1 | 4 | 1 | 1 | 3 | 1 |
| 1 | 1 | 1 | 1 | 1 | 1 | 1 | 1 | 1 |
| 1 | 1 | 2 | 1 | 1 | 1 | 1 | 1 | 1 |
| 1 | 1 | 4 | 1 | 1 | 1 | 1 | 1 | 1 |
| 1 | 2 | 3 | 1 | 1 | 2 | 1 | 2 | 1 |
| 4 | 3 | 4 | 2 | 4 | 4 | 2 | 2 | 3 |
| 1 | 1 | 1 | 1 | 1 | 1 | 1 | 1 | 1 |
| 4 | 4 | 4 | 4 | 4 | 4 | 4 | 3 | 4 |
| 1 | 1 | 1 | 1 | 1 | 1 | 1 | 1 | 1 |
| 1 | 1 | 1 | 1 | 2 | 1 | 2 | 1 | 1 |
| 1 | 1 | 2 | 1 | 1 | 1 | 1 | 2 | 1 |
| 4 | 4 | 4 | 2 | 4 | 3 | 2 | 2 | 2 |
| 1 | 3 | 3 | 2 | 2 | 3 | 2 | 2 | 1 |
| 1 | 3 | 3 | 2 | 2 | 3 | 2 | 2 | 1 |
| 1 | 1 | 3 | 1 | 1 | 1 | 1 | 3 | 1 |
| 1 | 1 | 2 | 1 | 1 | 1 | 1 | 1 | 1 |
| 2 | 2 | 3 | 1 | 1 | 2 | 2 | 2 | 1 |

|   |   |   |   |   |   |   |   |   |
|---|---|---|---|---|---|---|---|---|
| 1 | 1 | 4 | 1 | 2 | 2 | 2 | 4 | 1 |
| 1 | 1 | 1 | 1 | 1 | 1 | 2 | 2 | 1 |
| 1 | 2 | 4 | 2 | 1 | 1 | 1 | 1 | 1 |
| 1 | 2 | 3 | 2 | 2 | 2 | 2 | 2 | 2 |
| 4 | 4 | 4 | 4 | 4 | 4 | 4 | 4 | 4 |
| 2 | 2 | 2 | 2 | 2 | 2 | 2 | 2 | 2 |
| 3 | 3 | 3 | 3 | 3 | 1 | 3 | 3 | 3 |
| 1 | 1 | 1 | 1 | 1 | 1 | 1 | 1 | 1 |
| 1 | 2 | 4 | 2 | 2 | 1 | 2 | 1 | 2 |
| 1 | 2 | 4 | 1 | 3 | 2 | 2 | 2 | 2 |
| 2 | 2 | 2 | 1 | 2 | 2 | 2 | 2 | 2 |
| 4 | 4 | 4 | 2 | 4 | 3 | 2 | 2 | 2 |
| 2 | 2 | 4 | 2 | 2 | 2 | 2 | 2 | 2 |
| 1 | 1 | 4 | 2 | 1 | 1 | 1 | 1 | 1 |
| 1 | 1 | 1 | 1 | 1 | 1 | 1 | 1 | 1 |
| 1 | 1 | 1 | 1 | 1 | 1 | 1 | 1 | 1 |
| 3 | 3 | 4 | 3 | 4 | 4 | 4 | 4 | 4 |
| 1 | 1 | 1 | 1 | 1 | 1 | 1 | 1 | 1 |
| 1 | 1 | 1 | 1 | 1 | 1 | 1 | 1 | 1 |
| 2 | 2 | 3 | 2 | 3 | 3 | 3 | 3 | 2 |
| 1 | 2 | 4 | 1 | 1 | 3 | 4 | 4 | 3 |
| 2 | 2 | 3 | 2 | 3 | 2 | 1 | 2 | 1 |
| 1 | 1 | 3 | 2 | 2 | 1 | 2 | 3 | 1 |
| 1 | 1 | 4 | 2 | 1 | 1 | 1 | 4 | 1 |
| 3 | 3 | 3 | 3 | 3 | 3 | 3 | 3 | 3 |
| 3 | 3 | 3 | 1 | 2 | 1 | 3 | 4 | 1 |
| 1 | 3 | 3 | 2 | 2 | 4 | 4 | 1 | 3 |
| 2 | 3 | 3 | 3 | 3 | 3 | 3 | 3 | 3 |
| 2 | 4 | 4 | 2 | 1 | 4 | 1 | 4 | 2 |
| 1 | 1 | 1 | 1 | 1 | 1 | 1 | 1 | 1 |
| 1 | 1 | 2 | 2 | 2 | 1 | 2 | 1 | 3 |
| 1 | 1 | 1 | 1 | 1 | 1 | 1 | 1 | 1 |
| 1 | 1 | 1 | 1 | 1 | 1 | 1 | 1 | 1 |
| 1 | 1 | 2 | 2 | 1 | 1 | 1 | 2 | 1 |
| 1 | 2 | 3 | 1 | 1 | 2 | 2 | 2 | 2 |
| 3 | 3 | 3 | 3 | 3 | 3 | 3 | 3 | 2 |
| 1 | 1 | 1 | 1 | 1 | 1 | 1 | 1 | 1 |
| 1 | 1 | 3 | 2 | 2 | 1 | 1 | 2 | 1 |
| 1 | 2 | 2 | 1 | 2 | 1 | 1 | 2 | 1 |
| 3 | 3 | 2 | 3 | 3 | 2 | 3 | 3 | 2 |
| 1 | 2 | 2 | 2 | 3 | 3 | 3 | 3 | 2 |
| 1 | 2 | 2 | 1 | 1 | 3 | 1 | 3 | 1 |
| 2 | 2 | 2 | 1 | 1 | 1 | 2 | 1 | 1 |
| 1 | 1 | 1 | 1 | 1 | 1 | 1 | 1 | 1 |
| 2 | 3 | 3 | 2 | 3 | 3 | 2 | 3 | 2 |
| 1 | 2 | 2 | 2 | 2 | 2 | 1 | 2 | 1 |
| 2 | 2 | 2 | 2 | 2 | 2 | 2 | 2 | 2 |
| 1 | 1 | 1 | 1 | 1 | 1 | 1 | 1 | 1 |
| 1 | 1 | 2 | 1 | 2 | 2 | 1 | 1 | 1 |
| 2 | 3 | 3 | 2 | 3 | 3 | 2 | 3 | 2 |
| 1 | 2 | 2 | 3 | 1 | 1 | 1 | 1 | 1 |
| 1 | 1 | 2 | 1 | 1 | 1 | 1 | 1 | 1 |
| 1 | 3 | 3 | 1 | 1 | 1 | 1 | 2 | 1 |
| 2 | 4 | 4 | 4 | 3 | 3 | 3 | 2 | 3 |





|   |   |   |   |   |   |   |   |   |
|---|---|---|---|---|---|---|---|---|
| 1 | 1 | 3 | 2 | 1 | 1 | 1 | 2 | 1 |
| 1 | 1 | 1 | 1 | 1 | 1 | 1 | 1 | 1 |
| 3 | 3 | 2 | 3 | 3 | 2 | 3 | 3 | 2 |
| 2 | 2 | 2 | 2 | 2 | 2 | 2 | 2 | 2 |
| 2 | 2 | 3 | 2 | 2 | 2 | 2 | 2 | 2 |
| 1 | 1 | 1 | 1 | 1 | 1 | 1 | 1 | 1 |
| 1 | 2 | 2 | 1 | 1 | 2 | 1 | 1 | 1 |
| 1 | 1 | 2 | 1 | 1 | 1 | 1 | 1 | 1 |
| 3 | 3 | 4 | 2 | 3 | 2 | 2 | 2 | 2 |
| 3 | 3 | 4 | 1 | 4 | 4 | 3 | 2 | 1 |
| 1 | 2 | 2 | 1 | 2 | 2 | 1 | 1 | 1 |
| 4 | 4 | 4 | 4 | 4 | 4 | 3 | 2 | 3 |
| 3 | 3 | 3 | 1 | 3 | 2 | 2 | 2 | 1 |
| 2 | 1 | 4 | 1 | 2 | 1 | 1 | 2 | 1 |
| 1 | 1 | 2 | 1 | 2 | 1 | 2 | 2 | 1 |
| 3 | 4 | 4 | 1 | 2 | 1 | 2 | 1 | 1 |
| 1 | 2 | 2 | 1 | 2 | 2 | 2 | 3 | 1 |
| 1 | 1 | 3 | 1 | 2 | 1 | 2 | 1 | 1 |
| 1 | 1 | 4 | 4 | 1 | 1 | 1 | 1 | 1 |
| 3 | 4 | 2 | 4 | 3 | 2 | 2 | 2 | 2 |
| 2 | 2 | 2 | 1 | 1 | 2 | 2 | 3 | 2 |
| 1 | 1 | 1 | 1 | 1 | 1 | 1 | 1 | 1 |
| 2 | 2 | 2 | 2 | 2 | 2 | 2 | 2 | 2 |
| 1 | 2 | 2 | 1 | 1 | 1 | 1 | 1 | 1 |
| 1 | 1 | 3 | 2 | 2 | 2 | 2 | 2 | 2 |
| 1 | 1 | 1 | 1 | 1 | 1 | 1 | 1 | 1 |
| 1 | 1 | 2 | 1 | 1 | 2 | 1 | 1 | 1 |
| 1 | 1 | 4 | 1 | 1 | 1 | 1 | 4 | 1 |
| 1 | 2 | 2 | 2 | 2 | 1 | 2 | 2 | 1 |
| 4 | 4 | 4 | 4 | 4 | 4 | 4 | 4 | 4 |
| 1 | 1 | 2 | 2 | 1 | 1 | 1 | 2 | 1 |
| 2 | 2 | 2 | 2 | 2 | 2 | 2 | 2 | 2 |
| 1 | 3 | 2 | 1 | 2 | 2 | 2 | 3 | 2 |
| 1 | 1 | 2 | 2 | 2 | 2 | 1 | 3 | 3 |
| 1 | 1 | 3 | 1 | 1 | 1 | 1 | 2 | 3 |
| 1 | 1 | 2 | 2 | 2 | 2 | 2 | 1 | 1 |
| 2 | 4 | 4 | 4 | 4 | 4 | 4 | 4 | 4 |
| 1 | 2 | 3 | 1 | 2 | 2 | 1 | 3 | 2 |
| 2 | 2 | 2 | 2 | 2 | 2 | 2 | 2 | 2 |
| 1 | 2 | 3 | 2 | 1 | 1 | 1 | 2 | 1 |
| 1 | 3 | 4 | 1 | 1 | 1 | 1 | 3 | 1 |
| 1 | 1 | 2 | 1 | 2 | 2 | 1 | 2 | 2 |
| 1 | 1 | 4 | 1 | 3 | 3 | 2 | 3 | 1 |
| 1 | 1 | 1 | 1 | 1 | 1 | 1 | 1 | 1 |
| 3 | 3 | 3 | 3 | 3 | 3 | 3 | 3 | 3 |
| 1 | 1 | 3 | 1 | 2 | 1 | 1 | 3 | 1 |
| 1 | 1 | 1 | 1 | 1 | 1 | 1 | 3 | 1 |
| 2 | 3 | 3 | 3 | 2 | 1 | 2 | 2 | 2 |
| 4 | 4 | 4 | 4 | 4 | 4 | 4 | 4 | 4 |
| 1 | 1 | 2 | 1 | 1 | 1 | 1 | 1 | 1 |
| 4 | 2 | 3 | 2 | 2 | 2 | 2 | 1 | 1 |
| 2 | 3 | 3 | 3 | 1 | 2 | 2 | 3 | 1 |
| 2 | 2 | 3 | 1 | 2 | 1 | 1 | 2 | 1 |
| 2 | 2 | 2 | 1 | 1 | 2 | 1 | 2 | 1 |

|   |   |   |   |   |   |   |   |   |
|---|---|---|---|---|---|---|---|---|
| 1 | 3 | 4 | 1 | 2 | 3 | 1 | 4 | 1 |
| 1 | 2 | 4 | 4 | 4 | 4 | 3 | 4 | 4 |
| 3 | 3 | 3 | 3 | 3 | 3 | 3 | 3 | 3 |
| 2 | 2 | 4 | 2 | 3 | 3 | 2 | 3 | 1 |
| 1 | 4 | 2 | 1 | 4 | 4 | 4 | 1 | 1 |
| 1 | 1 | 4 | 1 | 1 | 2 | 1 | 2 | 1 |
| 1 | 1 | 2 | 1 | 1 | 1 | 1 | 1 | 1 |
| 2 | 3 | 3 | 3 | 1 | 2 | 2 | 3 | 1 |
| 1 | 1 | 2 | 2 | 1 | 1 | 1 | 1 | 1 |
| 4 | 4 | 4 | 4 | 4 | 4 | 4 | 4 | 4 |
| 1 | 1 | 2 | 1 | 1 | 1 | 1 | 1 | 1 |
| 1 | 1 | 1 | 1 | 1 | 2 | 1 | 1 | 1 |
| 1 | 2 | 4 | 2 | 2 | 2 | 2 | 2 | 2 |
| 1 | 1 | 1 | 2 | 2 | 2 | 2 | 1 | 2 |
| 2 | 2 | 2 | 2 | 2 | 2 | 2 | 2 | 2 |
| 1 | 1 | 1 | 1 | 1 | 1 | 1 | 1 | 1 |
| 1 | 1 | 1 | 1 | 1 | 1 | 1 | 1 | 1 |
| 2 | 3 | 3 | 3 | 2 | 2 | 2 | 4 | 1 |
| 1 | 3 | 3 | 1 | 2 | 2 | 1 | 2 | 1 |
| 3 | 4 | 4 | 2 | 2 | 2 | 2 | 3 | 2 |
| 2 | 2 | 3 | 3 | 3 | 3 | 3 | 3 | 2 |
| 1 | 1 | 2 | 1 | 2 | 1 | 1 | 1 | 1 |
| 2 | 2 | 2 | 2 | 2 | 2 | 2 | 2 | 1 |
| 1 | 2 | 3 | 1 | 1 | 2 | 1 | 2 | 1 |
| 2 | 2 | 3 | 1 | 2 | 2 | 2 | 1 | 1 |
| 3 | 4 | 4 | 4 | 4 | 4 | 4 | 2 | 2 |
| 1 | 2 | 1 | 1 | 1 | 1 | 1 | 1 | 1 |
| 1 | 1 | 2 | 1 | 1 | 1 | 1 | 2 | 1 |
| 4 | 4 | 4 | 4 | 4 | 4 | 4 | 4 | 4 |
| 1 | 1 | 1 | 1 | 2 | 1 | 1 | 2 | 1 |
| 2 | 2 | 2 | 2 | 2 | 2 | 2 | 2 | 2 |
| 1 | 1 | 4 | 1 | 4 | 4 | 1 | 4 | 1 |
| 3 | 2 | 4 | 3 | 3 | 3 | 3 | 2 | 2 |
| 1 | 1 | 3 | 2 | 1 | 1 | 1 | 2 | 1 |
| 1 | 1 | 1 | 1 | 1 | 1 | 1 | 1 | 1 |
| 2 | 2 | 2 | 2 | 2 | 2 | 2 | 2 | 2 |
| 1 | 1 | 2 | 1 | 1 | 1 | 1 | 2 | 1 |
| 2 | 3 | 2 | 3 | 2 | 3 | 2 | 2 | 2 |
| 3 | 3 | 3 | 3 | 3 | 3 | 3 | 3 | 3 |
| 2 | 2 | 2 | 1 | 2 | 1 | 2 | 2 | 1 |
| 1 | 1 | 4 | 3 | 1 | 2 | 3 | 2 | 2 |
| 1 | 1 | 4 | 2 | 2 | 1 | 1 | 2 | 1 |
| 2 | 2 | 3 | 1 | 2 | 2 | 1 | 2 | 1 |
| 1 | 2 | 2 | 1 | 2 | 1 | 1 | 2 | 1 |
| 1 | 2 | 2 | 1 | 1 | 1 | 1 | 1 | 1 |
| 1 | 1 | 2 | 1 | 1 | 1 | 1 | 1 | 1 |
| 2 | 2 | 4 | 2 | 4 | 2 | 2 | 3 | 4 |
| 1 | 1 | 2 | 1 | 1 | 1 | 1 | 1 | 1 |
| 3 | 3 | 4 | 3 | 2 | 2 | 2 | 1 | 2 |
| 2 | 2 | 3 | 2 | 2 | 3 | 2 | 2 | 1 |
| 2 | 2 | 2 | 2 | 2 | 2 | 2 | 2 | 2 |
| 1 | 4 | 4 | 4 | 4 | 4 | 4 | 1 | 2 |
| 3 | 3 | 4 | 4 | 4 | 4 | 2 | 2 | 3 |
| 2 | 4 | 4 | 1 | 2 | 3 | 3 | 2 | 4 |



|   |   |   |   |   |   |   |   |   |
|---|---|---|---|---|---|---|---|---|
| 1 | 1 | 1 | 1 | 1 | 1 | 1 | 1 | 1 |
| 1 | 1 | 1 | 1 | 1 | 1 | 1 | 1 | 1 |
| 1 | 1 | 2 | 1 | 1 | 1 | 1 | 1 | 1 |
| 2 | 2 | 3 | 2 | 2 | 3 | 1 | 3 | 2 |
| 1 | 1 | 3 | 1 | 2 | 3 | 2 | 3 | 2 |
| 1 | 1 | 1 | 1 | 1 | 1 | 1 | 1 | 1 |
| 2 | 2 | 3 | 2 | 3 | 4 | 2 | 4 | 1 |
| 2 | 2 | 3 | 1 | 1 | 1 | 1 | 1 | 1 |
| 1 | 3 | 3 | 1 | 1 | 1 | 1 | 1 | 1 |
| 2 | 2 | 4 | 1 | 2 | 2 | 2 | 3 | 2 |
| 1 | 1 | 2 | 1 | 2 | 1 | 1 | 2 | 1 |
| 3 | 3 | 3 | 3 | 3 | 2 | 2 | 3 | 2 |
| 1 | 1 | 2 | 1 | 1 | 1 | 1 | 2 | 1 |
| 2 | 2 | 3 | 2 | 2 | 2 | 2 | 3 | 1 |
| 1 | 2 | 1 | 2 | 1 | 2 | 1 | 2 | 1 |
| 1 | 3 | 4 | 1 | 2 | 2 | 2 | 2 | 2 |
| 2 | 3 | 2 | 2 | 3 | 2 | 2 | 2 | 2 |
| 2 | 1 | 2 | 1 | 1 | 2 | 1 | 2 | 1 |
| 1 | 1 | 2 | 1 | 2 | 2 | 1 | 2 | 1 |
| 1 | 2 | 1 | 1 | 1 | 1 | 1 | 1 | 1 |
| 2 | 2 | 2 | 1 | 1 | 1 | 1 | 2 | 1 |
| 1 | 1 | 3 | 3 | 2 | 2 | 2 | 2 | 1 |
| 3 | 3 | 3 | 3 | 3 | 3 | 3 | 3 | 4 |
| 2 | 3 | 3 | 3 | 3 | 3 | 3 | 2 | 3 |
| 2 | 3 | 1 | 3 | 1 | 2 | 2 | 1 | 2 |
| 1 | 3 | 3 | 2 | 2 | 2 | 2 | 2 | 1 |
| 2 | 2 | 2 | 2 | 2 | 2 | 2 | 2 | 2 |
| 2 | 2 | 3 | 1 | 2 | 2 | 2 | 2 | 2 |
| 1 | 4 | 4 | 2 | 2 | 2 | 2 | 2 | 2 |
| 4 | 4 | 4 | 4 | 4 | 4 | 4 | 2 | 3 |
| 1 | 1 | 1 | 1 | 1 | 1 | 1 | 1 | 1 |
| 1 | 1 | 3 | 1 | 1 | 2 | 2 | 4 | 1 |
| 4 | 4 | 4 | 4 | 4 | 4 | 4 | 4 | 4 |
| 1 | 2 | 2 | 1 | 1 | 1 | 1 | 3 | 1 |
| 1 | 2 | 3 | 1 | 1 | 1 | 1 | 1 | 1 |
| 2 | 2 | 3 | 2 | 2 | 2 | 2 | 3 | 1 |
| 1 | 1 | 1 | 1 | 1 | 1 | 1 | 1 | 1 |
| 2 | 2 | 2 | 2 | 2 | 2 | 2 | 2 | 2 |
| 1 | 1 | 1 | 1 | 1 | 1 | 1 | 1 | 1 |
| 1 | 2 | 2 | 1 | 2 | 1 | 1 | 2 | 1 |
| 4 | 4 | 4 | 4 | 4 | 4 | 4 | 4 | 4 |
| 1 | 1 | 1 | 1 | 1 | 1 | 1 | 1 | 1 |
| 1 | 1 | 2 | 1 | 1 | 1 | 1 | 1 | 1 |
| 1 | 2 | 1 | 1 | 2 | 1 | 1 | 1 | 1 |
| 1 | 1 | 2 | 1 | 1 | 1 | 1 | 4 | 1 |
| 4 | 4 | 4 | 4 | 4 | 4 | 4 | 4 | 4 |
| 2 | 3 | 4 | 1 | 3 | 3 | 2 | 4 | 2 |
| 1 | 3 | 3 | 3 | 2 | 2 | 2 | 2 | 2 |
| 1 | 2 | 3 | 1 | 2 | 2 | 1 | 2 | 2 |
| 3 | 3 | 4 | 3 | 3 | 4 | 3 | 3 | 3 |
| 4 | 4 | 4 | 3 | 4 | 4 | 3 | 3 | 4 |
| 1 | 1 | 1 | 1 | 1 | 1 | 1 | 2 | 1 |
| 1 | 1 | 1 | 1 | 1 | 1 | 1 | 1 | 1 |
| 1 | 2 | 2 | 1 | 2 | 1 | 2 | 1 | 1 |

|   |   |   |   |   |   |   |   |   |
|---|---|---|---|---|---|---|---|---|
| 1 | 1 | 1 | 1 | 1 | 1 | 1 | 1 | 4 |
| 3 | 3 | 4 | 4 | 4 | 3 | 4 | 3 | 3 |
| 3 | 2 | 3 | 1 | 2 | 2 | 2 | 2 | 2 |
| 1 | 1 | 1 | 1 | 1 | 1 | 1 | 3 | 1 |
| 4 | 4 | 4 | 4 | 4 | 4 | 4 | 4 | 4 |
| 3 | 1 | 4 | 1 | 3 | 1 | 1 | 1 | 1 |
| 1 | 2 | 2 | 2 | 3 | 3 | 2 | 2 | 2 |
| 3 | 3 | 3 | 3 | 3 | 3 | 3 | 3 | 3 |
| 4 | 4 | 4 | 4 | 4 | 4 | 4 | 4 | 4 |
| 1 | 1 | 1 | 1 | 1 | 1 | 1 | 4 | 1 |
| 2 | 1 | 1 | 1 | 1 | 4 | 1 | 1 | 1 |
| 3 | 3 | 3 | 3 | 3 | 3 | 3 | 3 | 3 |
| 1 | 1 | 1 | 1 | 1 | 1 | 1 | 1 | 1 |
| 1 | 1 | 1 | 1 | 1 | 1 | 1 | 1 | 1 |
| 1 | 1 | 1 | 1 | 1 | 2 | 1 | 1 | 1 |
| 2 | 2 | 3 | 2 | 3 | 2 | 3 | 1 | 2 |
| 1 | 1 | 1 | 1 | 1 | 1 | 1 | 1 | 1 |
| 1 | 1 | 1 | 1 | 1 | 1 | 1 | 1 | 1 |
| 1 | 1 | 2 | 1 | 1 | 2 | 2 | 3 | 1 |
| 1 | 2 | 2 | 1 | 1 | 1 | 1 | 1 | 1 |
| 3 | 3 | 4 | 3 | 3 | 4 | 2 | 4 | 2 |
| 1 | 1 | 1 | 1 | 1 | 1 | 1 | 1 | 1 |
| 1 | 1 | 1 | 1 | 1 | 1 | 1 | 2 | 1 |
| 2 | 2 | 2 | 2 | 2 | 2 | 2 | 2 | 2 |
| 1 | 1 | 3 | 1 | 1 | 1 | 1 | 1 | 1 |
| 2 | 3 | 2 | 4 | 2 | 1 | 1 | 1 | 1 |
| 1 | 1 | 4 | 1 | 1 | 1 | 1 | 2 | 1 |
| 1 | 1 | 1 | 1 | 1 | 1 | 1 | 1 | 1 |
| 3 | 3 | 3 | 1 | 2 | 2 | 2 | 2 | 2 |
| 1 | 2 | 2 | 1 | 1 | 1 | 1 | 1 | 1 |
| 4 | 2 | 2 | 2 | 2 | 2 | 1 | 1 | 2 |
| 2 | 4 | 3 | 1 | 1 | 1 | 1 | 2 | 1 |
| 1 | 1 | 1 | 1 | 1 | 1 | 1 | 1 | 1 |
| 1 | 2 | 2 | 1 | 1 | 1 | 1 | 2 | 1 |
| 2 | 2 | 2 | 1 | 2 | 2 | 1 | 2 | 2 |
| 1 | 2 | 3 | 3 | 2 | 4 | 1 | 2 | 4 |
| 1 | 4 | 4 | 1 | 1 | 1 | 1 | 3 | 3 |
| 1 | 1 | 1 | 1 | 1 | 1 | 1 | 1 | 1 |
| 2 | 3 | 3 | 1 | 2 | 3 | 2 | 3 | 2 |
| 2 | 3 | 3 | 1 | 1 | 2 | 2 | 3 | 2 |
| 1 | 2 | 3 | 1 | 2 | 1 | 1 | 2 | 1 |
| 1 | 1 | 1 | 1 | 1 | 1 | 1 | 1 | 1 |
| 1 | 1 | 1 | 1 | 1 | 1 | 1 | 1 | 1 |
| 1 | 1 | 1 | 1 | 1 | 1 | 1 | 3 | 1 |
| 1 | 1 | 1 | 1 | 1 | 1 | 1 | 1 | 1 |
| 1 | 1 | 2 | 1 | 2 | 3 | 1 | 2 | 1 |
| 1 | 1 | 1 | 1 | 1 | 1 | 1 | 1 | 4 |
| 2 | 2 | 4 | 1 | 2 | 2 | 1 | 2 | 2 |
| 2 | 2 | 3 | 1 | 3 | 3 | 3 | 2 | 2 |
| 3 | 3 | 4 | 2 | 3 | 2 | 2 | 2 | 2 |
| 3 | 3 | 3 | 3 | 3 | 3 | 3 | 3 | 3 |
| 1 | 1 | 2 | 1 | 2 | 3 | 1 | 2 | 1 |
| 1 | 1 | 1 | 1 | 1 | 1 | 1 | 1 | 1 |
| 3 | 3 | 4 | 1 | 4 | 4 | 3 | 4 | 1 |

|   |   |   |   |   |   |   |   |   |
|---|---|---|---|---|---|---|---|---|
| 3 | 3 | 3 | 3 | 3 | 3 | 3 | 3 | 3 |
| 1 | 4 | 4 | 1 | 1 | 2 | 1 | 3 | 1 |
| 1 | 1 | 1 | 1 | 1 | 1 | 1 | 1 | 1 |
| 2 | 2 | 2 | 2 | 2 | 2 | 2 | 2 | 2 |
| 1 | 4 | 4 | 4 | 4 | 4 | 4 | 4 | 1 |
| 1 | 1 | 1 | 1 | 1 | 1 | 1 | 1 | 1 |
| 4 | 4 | 4 | 4 | 4 | 4 | 4 | 4 | 4 |
| 1 | 1 | 4 | 4 | 3 | 3 | 4 | 1 | 3 |
| 4 | 2 | 4 | 4 | 3 | 3 | 3 | 4 | 1 |
| 1 | 1 | 1 | 1 | 1 | 1 | 1 | 1 | 1 |
| 1 | 1 | 1 | 1 | 1 | 1 | 1 | 1 | 1 |
| 2 | 3 | 4 | 1 | 2 | 2 | 1 | 3 | 2 |
| 1 | 1 | 1 | 1 | 1 | 1 | 1 | 1 | 1 |
| 3 | 3 | 3 | 3 | 3 | 3 | 2 | 3 | 3 |
| 1 | 2 | 2 | 2 | 2 | 1 | 2 | 3 | 1 |
| 3 | 1 | 4 | 4 | 3 | 3 | 4 | 1 | 2 |
| 1 | 2 | 2 | 2 | 2 | 1 | 2 | 3 | 1 |
| 1 | 1 | 1 | 1 | 1 | 1 | 1 | 1 | 1 |
| 1 | 1 | 3 | 1 | 1 | 1 | 1 | 1 | 1 |
| 2 | 2 | 1 | 1 | 2 | 2 | 2 | 2 | 2 |
| 1 | 1 | 1 | 1 | 1 | 1 | 1 | 1 | 1 |
| 3 | 3 | 3 | 3 | 3 | 3 | 3 | 3 | 3 |
| 1 | 1 | 1 | 1 | 1 | 1 | 1 | 1 | 1 |
| 1 | 1 | 4 | 1 | 4 | 1 | 1 | 1 | 1 |
| 2 | 2 | 2 | 2 | 2 | 2 | 2 | 2 | 2 |
| 4 | 3 | 2 | 2 | 3 | 2 | 3 | 3 | 2 |
| 3 | 3 | 3 | 3 | 3 | 3 | 3 | 3 | 3 |
| 1 | 1 | 2 | 1 | 1 | 1 | 1 | 2 | 1 |
| 1 | 1 | 4 | 1 | 1 | 1 | 1 | 4 | 1 |
| 2 | 3 | 3 | 1 | 2 | 2 | 2 | 3 | 2 |
| 1 | 1 | 2 | 1 | 1 | 2 | 2 | 2 | 1 |
| 2 | 2 | 2 | 2 | 2 | 2 | 2 | 2 | 2 |
| 1 | 1 | 3 | 1 | 1 | 2 | 1 | 2 | 1 |
| 2 | 2 | 3 | 2 | 2 | 2 | 2 | 2 | 1 |
| 2 | 2 | 2 | 2 | 2 | 2 | 2 | 2 | 1 |
| 1 | 1 | 3 | 2 | 2 | 2 | 2 | 2 | 2 |
| 2 | 2 | 2 | 3 | 2 | 2 | 2 | 3 | 2 |
| 1 | 2 | 2 | 1 | 1 | 1 | 1 | 1 | 1 |
| 1 | 2 | 2 | 1 | 1 | 1 | 1 | 2 | 1 |
| 3 | 3 | 3 | 3 | 3 | 3 | 3 | 3 | 2 |
| 1 | 2 | 4 | 2 | 2 | 1 | 1 | 4 | 2 |
| 1 | 1 | 1 | 1 | 1 | 2 | 1 | 1 | 1 |
| 1 | 1 | 2 | 1 | 1 | 1 | 1 | 2 | 1 |
| 3 | 2 | 3 | 2 | 1 | 2 | 2 | 2 | 1 |
| 4 | 4 | 4 | 4 | 4 | 4 | 4 | 4 | 4 |
| 1 | 1 | 1 | 1 | 1 | 1 | 1 | 1 | 1 |
| 2 | 3 | 3 | 2 | 2 | 2 | 2 | 3 | 2 |
| 2 | 2 | 2 | 2 | 2 | 2 | 2 | 1 | 1 |
| 1 | 2 | 2 | 1 | 2 | 1 | 2 | 3 | 1 |
| 1 | 1 | 2 | 1 | 1 | 2 | 1 | 1 | 1 |
| 1 | 1 | 2 | 1 | 1 | 1 | 1 | 2 | 1 |
| 1 | 1 | 1 | 1 | 1 | 1 | 1 | 1 | 1 |
| 2 | 2 | 2 | 2 | 2 | 2 | 2 | 2 | 2 |
| 2 | 4 | 2 | 1 | 2 | 2 | 2 | 3 | 2 |

|   |   |   |   |   |   |   |   |   |
|---|---|---|---|---|---|---|---|---|
| 1 | 1 | 2 | 1 | 1 | 1 | 1 | 1 | 1 |
| 3 | 2 | 3 | 3 | 3 | 3 | 3 | 2 | 2 |
| 1 | 3 | 4 | 3 | 3 | 3 | 3 | 2 | 4 |
| 1 | 1 | 1 | 1 | 1 | 1 | 1 | 2 | 1 |
| 2 | 3 | 3 | 3 | 2 | 2 | 2 | 2 | 1 |
| 2 | 4 | 4 | 4 | 4 | 4 | 2 | 2 | 1 |
| 2 | 3 | 2 | 1 | 1 | 2 | 1 | 1 | 1 |
| 2 | 3 | 3 | 3 | 2 | 2 | 2 | 1 | 2 |
| 1 | 1 | 3 | 2 | 1 | 2 | 2 | 1 | 1 |
| 1 | 1 | 1 | 1 | 1 | 1 | 1 | 1 | 1 |
| 1 | 1 | 1 | 1 | 1 | 1 | 1 | 1 | 1 |
| 4 | 4 | 4 | 4 | 4 | 4 | 4 | 4 | 4 |
| 1 | 2 | 2 | 1 | 1 | 1 | 1 | 1 | 1 |
| 1 | 3 | 4 | 2 | 2 | 2 | 2 | 2 | 2 |
| 1 | 1 | 3 | 1 | 1 | 1 | 1 | 1 | 2 |
| 4 | 3 | 4 | 3 | 4 | 4 | 3 | 3 | 3 |
| 2 | 1 | 2 | 1 | 1 | 2 | 2 | 2 | 1 |
| 2 | 3 | 3 | 2 | 2 | 3 | 3 | 2 | 3 |
| 2 | 3 | 3 | 2 | 2 | 2 | 2 | 2 | 2 |
| 1 | 1 | 3 | 1 | 1 | 1 | 1 | 3 | 1 |
| 1 | 2 | 2 | 2 | 2 | 2 | 2 | 2 | 1 |
| 3 | 3 | 3 | 3 | 3 | 3 | 3 | 3 | 3 |
| 1 | 2 | 2 | 2 | 2 | 2 | 2 | 2 | 2 |
| 1 | 4 | 4 | 4 | 4 | 4 | 4 | 4 | 4 |
| 2 | 3 | 2 | 3 | 2 | 2 | 4 | 2 | 4 |
| 2 | 2 | 2 | 1 | 1 | 1 | 1 | 2 | 1 |
| 1 | 1 | 2 | 1 | 1 | 1 | 1 | 2 | 1 |
| 2 | 4 | 4 | 4 | 4 | 4 | 4 | 4 | 4 |
| 3 | 2 | 2 | 1 | 1 | 3 | 1 | 3 | 2 |
| 1 | 3 | 2 | 1 | 2 | 2 | 2 | 3 | 1 |
| 1 | 1 | 2 | 1 | 1 | 1 | 1 | 2 | 1 |
| 2 | 2 | 3 | 1 | 2 | 2 | 2 | 2 | 2 |
| 2 | 2 | 2 | 2 | 2 | 2 | 2 | 2 | 2 |
| 2 | 1 | 1 | 1 | 1 | 1 | 1 | 1 | 1 |
| 2 | 2 | 1 | 4 | 4 | 4 | 2 | 2 | 2 |
| 1 | 4 | 4 | 4 | 4 | 4 | 4 | 4 | 4 |
| 1 | 3 | 2 | 2 | 2 | 1 | 2 | 2 | 2 |
| 4 | 2 | 1 | 1 | 1 | 1 | 1 | 1 | 2 |
| 2 | 4 | 3 | 2 | 2 | 2 | 2 | 2 | 2 |
| 1 | 1 | 1 | 1 | 1 | 1 | 1 | 1 | 1 |
| 3 | 3 | 3 | 3 | 3 | 3 | 3 | 3 | 3 |
| 1 | 1 | 2 | 1 | 1 | 1 | 1 | 2 | 1 |
| 1 | 1 | 1 | 1 | 1 | 1 | 1 | 1 | 1 |
| 2 | 2 | 2 | 1 | 1 | 1 | 2 | 1 | 1 |
| 1 | 2 | 3 | 1 | 2 | 2 | 2 | 2 | 1 |
| 2 | 1 | 2 | 1 | 2 | 2 | 1 | 3 | 1 |
| 1 | 2 | 3 | 2 | 2 | 3 | 2 | 2 | 2 |
| 1 | 2 | 3 | 2 | 2 | 2 | 2 | 2 | 1 |
| 1 | 1 | 4 | 3 | 1 | 3 | 1 | 2 | 1 |
| 3 | 4 | 4 | 1 | 3 | 2 | 4 | 3 | 3 |
| 1 | 2 | 4 | 1 | 1 | 1 | 1 | 2 | 1 |
| 1 | 2 | 2 | 1 | 1 | 1 | 1 | 1 | 1 |
| 1 | 1 | 1 | 1 | 1 | 1 | 1 | 1 | 1 |
| 1 | 2 | 2 | 1 | 1 | 1 | 1 | 2 | 1 |



|   |   |   |   |   |   |   |   |   |
|---|---|---|---|---|---|---|---|---|
| 1 | 1 | 2 | 1 | 2 | 1 | 1 | 1 | 1 |
| 2 | 2 | 3 | 2 | 3 | 2 | 2 | 2 | 3 |
| 1 | 1 | 1 | 2 | 1 | 1 | 1 | 2 | 1 |
| 1 | 1 | 1 | 1 | 1 | 1 | 1 | 1 | 1 |
| 2 | 2 | 3 | 2 | 2 | 2 | 1 | 2 | 1 |
| 1 | 2 | 2 | 2 | 1 | 1 | 2 | 2 | 2 |
| 1 | 1 | 1 | 1 | 1 | 1 | 1 | 1 | 1 |
| 1 | 3 | 4 | 4 | 4 | 3 | 2 | 4 | 2 |
| 1 | 1 | 2 | 1 | 1 | 1 | 1 | 1 | 1 |
| 1 | 1 | 2 | 1 | 1 | 1 | 1 | 3 | 1 |
| 1 | 1 | 2 | 1 | 1 | 1 | 1 | 3 | 1 |
| 4 | 2 | 4 | 3 | 4 | 4 | 1 | 2 | 1 |
| 2 | 3 | 3 | 3 | 3 | 3 | 3 | 2 | 3 |
| 2 | 2 | 2 | 1 | 1 | 1 | 1 | 1 | 1 |
| 2 | 2 | 3 | 1 | 1 | 1 | 1 | 2 | 1 |
| 1 | 1 | 1 | 1 | 1 | 1 | 1 | 2 | 1 |
| 1 | 2 | 1 | 1 | 1 | 1 | 1 | 3 | 1 |
| 1 | 1 | 1 | 1 | 1 | 1 | 1 | 1 | 1 |
| 1 | 2 | 3 | 2 | 2 | 2 | 2 | 1 | 2 |
| 3 | 2 | 2 | 1 | 2 | 1 | 2 | 1 | 2 |
| 1 | 1 | 2 | 1 | 1 | 1 | 1 | 2 | 1 |
| 2 | 2 | 2 | 1 | 2 | 2 | 2 | 2 | 2 |
| 1 | 1 | 1 | 1 | 1 | 1 | 1 | 1 | 1 |
| 1 | 1 | 1 | 1 | 1 | 1 | 1 | 1 | 1 |
| 1 | 1 | 4 | 1 | 1 | 1 | 1 | 1 | 2 |
| 2 | 1 | 2 | 2 | 1 | 1 | 1 | 2 | 1 |
| 1 | 1 | 1 | 1 | 1 | 1 | 1 | 1 | 1 |
| 1 | 1 | 4 | 1 | 4 | 1 | 1 | 1 | 1 |
| 1 | 1 | 2 | 1 | 1 | 1 | 1 | 1 | 1 |
| 1 | 1 | 1 | 1 | 1 | 1 | 1 | 3 | 1 |
| 1 | 2 | 4 | 1 | 1 | 3 | 1 | 1 | 1 |
| 2 | 1 | 2 | 1 | 1 | 1 | 1 | 1 | 1 |
| 2 | 2 | 4 | 3 | 3 | 2 | 1 | 1 | 2 |
| 1 | 1 | 2 | 1 | 1 | 1 | 1 | 1 | 1 |
| 1 | 1 | 3 | 1 | 2 | 2 | 1 | 1 | 1 |
| 1 | 1 | 1 | 1 | 1 | 1 | 1 | 2 | 1 |
| 2 | 2 | 2 | 2 | 2 | 2 | 2 | 2 | 1 |
| 1 | 2 | 4 | 2 | 3 | 2 | 2 | 3 | 1 |
| 4 | 4 | 1 | 4 | 1 | 4 | 1 | 4 | 1 |
| 1 | 1 | 2 | 1 | 1 | 1 | 1 | 2 | 1 |
| 1 | 1 | 2 | 1 | 1 | 1 | 1 | 1 | 1 |
| 1 | 2 | 4 | 2 | 3 | 3 | 2 | 2 | 2 |
| 1 | 1 | 1 | 1 | 1 | 1 | 1 | 1 | 1 |
| 1 | 1 | 2 | 1 | 1 | 1 | 1 | 1 | 1 |
| 1 | 3 | 1 | 2 | 1 | 2 | 2 | 2 | 1 |
| 1 | 2 | 4 | 2 | 1 | 2 | 2 | 3 | 1 |
| 2 | 2 | 2 | 1 | 1 | 2 | 2 | 3 | 3 |
| 1 | 1 | 2 | 2 | 2 | 2 | 1 | 1 | 1 |
| 1 | 1 | 2 | 1 | 1 | 1 | 1 | 1 | 1 |
| 1 | 2 | 4 | 1 | 2 | 2 | 1 | 2 | 1 |
| 2 | 2 | 2 | 1 | 1 | 1 | 1 | 1 | 1 |
| 1 | 1 | 2 | 1 | 1 | 1 | 1 | 1 | 1 |
| 3 | 2 | 3 | 4 | 2 | 4 | 2 | 4 | 2 |
| 1 | 3 | 3 | 1 | 1 | 1 | 1 | 1 | 1 |

|   |   |   |   |   |   |   |   |   |
|---|---|---|---|---|---|---|---|---|
| 2 | 3 | 4 | 4 | 2 | 2 | 2 | 1 | 2 |
| 2 | 3 | 3 | 3 | 3 | 1 | 1 | 3 | 2 |
| 1 | 1 | 2 | 1 | 1 | 1 | 1 | 1 | 1 |
| 1 | 4 | 4 | 1 | 1 | 1 | 1 | 1 | 1 |
| 2 | 3 | 2 | 1 | 2 | 2 | 2 | 1 | 1 |
| 3 | 2 | 4 | 3 | 3 | 4 | 4 | 2 | 4 |
| 2 | 1 | 3 | 2 | 2 | 2 | 2 | 2 | 1 |
| 1 | 1 | 4 | 1 | 1 | 1 | 1 | 2 | 1 |
| 2 | 2 | 4 | 2 | 1 | 1 | 1 | 2 | 1 |
| 3 | 3 | 4 | 1 | 4 | 2 | 2 | 2 | 2 |
| 2 | 2 | 3 | 1 | 2 | 2 | 1 | 1 | 2 |
| 1 | 3 | 2 | 1 | 2 | 1 | 1 | 1 | 1 |
| 1 | 4 | 3 | 3 | 3 | 2 | 1 | 2 | 1 |
| 1 | 1 | 1 | 1 | 1 | 1 | 1 | 2 | 1 |
| 1 | 1 | 1 | 1 | 1 | 1 | 1 | 2 | 1 |
| 1 | 2 | 1 | 1 | 1 | 2 | 1 | 1 | 1 |
| 1 | 2 | 2 | 2 | 2 | 2 | 2 | 2 | 1 |
| 1 | 1 | 1 | 1 | 1 | 1 | 1 | 1 | 1 |
| 1 | 1 | 1 | 1 | 1 | 1 | 1 | 1 | 1 |
| 1 | 1 | 2 | 1 | 1 | 1 | 1 | 1 | 1 |
| 2 | 3 | 4 | 2 | 3 | 3 | 2 | 4 | 2 |
| 1 | 2 | 3 | 2 | 2 | 1 | 2 | 1 | 2 |
| 1 | 1 | 1 | 1 | 1 | 1 | 1 | 1 | 1 |
| 1 | 2 | 2 | 2 | 1 | 2 | 2 | 2 | 1 |
| 1 | 1 | 2 | 1 | 1 | 1 | 1 | 1 | 1 |
| 1 | 1 | 2 | 1 | 1 | 1 | 2 | 1 | 1 |
| 2 | 2 | 2 | 2 | 2 | 2 | 2 | 2 | 2 |
| 1 | 1 | 2 | 1 | 1 | 1 | 1 | 1 | 1 |
| 2 | 2 | 2 | 2 | 2 | 2 | 2 | 2 | 2 |
| 1 | 1 | 1 | 1 | 1 | 1 | 1 | 2 | 1 |
| 2 | 2 | 3 | 2 | 2 | 2 | 2 | 2 | 2 |
| 1 | 2 | 3 | 2 | 2 | 2 | 2 | 2 | 1 |
| 1 | 2 | 2 | 1 | 1 | 2 | 2 | 1 | 1 |
| 1 | 1 | 3 | 1 | 1 | 2 | 1 | 1 | 1 |
| 2 | 2 | 2 | 2 | 2 | 2 | 2 | 2 | 1 |
| 2 | 2 | 2 | 1 | 2 | 2 | 2 | 2 | 2 |
| 1 | 1 | 2 | 1 | 1 | 1 | 1 | 1 | 1 |
| 1 | 1 | 1 | 1 | 1 | 1 | 1 | 1 | 1 |
| 1 | 2 | 2 | 1 | 2 | 2 | 1 | 2 | 1 |
| 1 | 3 | 3 | 1 | 1 | 1 | 1 | 3 | 1 |
| 1 | 1 | 1 | 1 | 1 | 2 | 1 | 2 | 1 |
| 1 | 1 | 1 | 1 | 1 | 1 | 1 | 1 | 1 |
| 3 | 3 | 3 | 3 | 2 | 3 | 2 | 3 | 2 |
| 1 | 1 | 2 | 1 | 1 | 1 | 1 | 1 | 1 |
| 1 | 1 | 2 | 1 | 1 | 1 | 1 | 1 | 1 |
| 2 | 1 | 3 | 1 | 1 | 1 | 1 | 1 | 1 |
| 1 | 1 | 1 | 1 | 1 | 1 | 1 | 1 | 1 |
| 2 | 2 | 3 | 1 | 1 | 1 | 1 | 1 | 1 |
| 1 | 1 | 2 | 1 | 1 | 1 | 1 | 1 | 1 |
| 1 | 2 | 2 | 1 | 1 | 2 | 2 | 2 | 1 |
| 1 | 3 | 2 | 1 | 2 | 2 | 2 | 2 | 1 |
| 2 | 2 | 3 | 2 | 2 | 2 | 2 | 2 | 3 |
| 1 | 2 | 1 | 1 | 2 | 3 | 1 | 1 | 1 |
| 1 | 2 | 3 | 1 | 2 | 3 | 2 | 1 | 1 |

|   |   |   |   |   |   |   |   |   |
|---|---|---|---|---|---|---|---|---|
| 2 | 2 | 2 | 2 | 2 | 2 | 2 | 2 | 2 |
| 1 | 1 | 3 | 1 | 1 | 1 | 1 | 2 | 1 |
| 1 | 1 | 2 | 1 | 1 | 1 | 1 | 2 | 1 |
| 2 | 4 | 4 | 4 | 4 | 2 | 4 | 4 | 2 |
| 1 | 1 | 1 | 1 | 1 | 1 | 1 | 1 | 1 |
| 1 | 2 | 3 | 1 | 2 | 3 | 2 | 1 | 1 |

| D16 | D17 | D18 | D19 | D20 | D21 | Negative emotions total scc |
|-----|-----|-----|-----|-----|-----|-----------------------------|
| 1   | 1   | 1   | 1   | 1   | 1   | 23                          |
| 3   | 1   | 1   | 1   | 1   | 1   | 40                          |
| 2   | 2   | 2   | 2   | 2   | 3   | 44                          |
| 1   | 1   | 1   | 1   | 1   | 1   | 33                          |
| 4   | 1   | 4   | 1   | 1   | 1   | 51                          |
| 1   | 1   | 2   | 1   | 1   | 1   | 29                          |
| 1   | 1   | 2   | 2   | 3   | 4   | 53                          |
| 3   | 1   | 2   | 3   | 1   | 1   | 49                          |
| 1   | 2   | 4   | 2   | 2   | 1   | 43                          |
| 1   | 1   | 2   | 1   | 1   | 2   | 29                          |
| 2   | 1   | 1   | 1   | 2   | 1   | 43                          |
| 1   | 1   | 2   | 1   | 1   | 1   | 39                          |
| 1   | 1   | 1   | 1   | 1   | 1   | 27                          |
| 4   | 4   | 4   | 4   | 4   | 4   | 59                          |
| 2   | 4   | 4   | 2   | 2   | 1   | 23                          |
| 1   | 1   | 1   | 1   | 1   | 1   | 30                          |
| 1   | 1   | 1   | 1   | 1   | 1   | 78                          |
| 4   | 1   | 4   | 4   | 4   | 1   | 32                          |
| 1   | 1   | 1   | 1   | 1   | 1   | 41                          |
| 1   | 1   | 2   | 2   | 2   | 1   | 47                          |
| 3   | 1   | 3   | 2   | 2   | 2   | 59                          |
| 3   | 1   | 3   | 3   | 3   | 3   | 21                          |
| 1   | 1   | 1   | 1   | 1   | 1   | 35                          |
| 1   | 1   | 2   | 2   | 1   | 1   | 33                          |
| 3   | 1   | 1   | 1   | 1   | 1   | 46                          |
| 1   | 1   | 2   | 2   | 1   | 2   | 41                          |
| 2   | 1   | 2   | 2   | 2   | 1   | 43                          |
| 2   | 1   | 2   | 1   | 2   | 1   | 35                          |
| 2   | 1   | 3   | 1   | 3   | 1   | 38                          |
| 2   | 1   | 2   | 1   | 1   | 1   | 26                          |
| 1   | 1   | 1   | 1   | 1   | 1   | 26                          |
| 1   | 1   | 2   | 1   | 1   | 1   | 26                          |
| 1   | 4   | 2   | 1   | 1   | 1   | 59                          |
| 3   | 1   | 3   | 3   | 3   | 1   | 48                          |
| 1   | 1   | 4   | 4   | 1   | 1   | 46                          |
| 1   | 1   | 1   | 1   | 1   | 1   | 22                          |
| 4   | 4   | 4   | 4   | 4   | 4   | 84                          |
| 4   | 4   | 4   | 4   | 4   | 4   | 84                          |
| 1   | 1   | 1   | 1   | 1   | 1   | 21                          |
| 1   | 4   | 1   | 4   | 1   | 4   | 51                          |
| 1   | 1   | 1   | 1   | 1   | 1   | 21                          |
| 1   | 1   | 1   | 1   | 1   | 1   | 54                          |
| 2   | 2   | 2   | 2   | 2   | 2   | 63                          |
| 1   | 1   | 1   | 1   | 1   | 1   | 21                          |
| 2   | 2   | 4   | 2   | 3   | 3   | 81                          |
| 3   | 3   | 3   | 3   | 3   | 3   | 26                          |
| 1   | 1   | 1   | 1   | 1   | 1   | 56                          |
| 4   | 4   | 4   | 4   | 4   | 4   | 81                          |
| 1   | 1   | 1   | 2   | 1   | 1   | 23                          |
| 3   | 3   | 2   | 3   | 2   | 3   | 21                          |
| 4   | 4   | 4   | 4   | 4   | 4   | 36                          |
| 1   | 1   | 1   | 1   | 1   | 1   | 64                          |
| 1   | 1   | 1   | 1   | 1   | 1   | 43                          |

|   |   |   |   |   |   |    |
|---|---|---|---|---|---|----|
| 2 | 1 | 2 | 3 | 3 | 1 | 57 |
| 1 | 1 | 2 | 1 | 1 | 1 | 21 |
| 2 | 4 | 3 | 2 | 4 | 3 | 23 |
| 2 | 1 | 2 | 2 | 2 | 2 | 21 |
| 2 | 1 | 2 | 2 | 3 | 1 | 56 |
| 1 | 1 | 1 | 1 | 1 | 1 | 31 |
| 1 | 1 | 1 | 1 | 1 | 1 | 33 |
| 1 | 1 | 1 | 1 | 1 | 1 | 35 |
| 3 | 4 | 2 | 3 | 4 | 4 | 21 |
| 1 | 1 | 4 | 1 | 1 | 1 | 21 |
| 1 | 1 | 2 | 1 | 1 | 1 | 25 |
| 1 | 1 | 1 | 2 | 2 | 1 | 21 |
| 1 | 1 | 1 | 1 | 1 | 1 | 21 |
| 1 | 1 | 1 | 1 | 1 | 1 | 21 |
| 1 | 1 | 2 | 1 | 1 | 1 | 28 |
| 1 | 1 | 1 | 1 | 1 | 1 | 43 |
| 1 | 1 | 1 | 1 | 1 | 1 | 44 |
| 1 | 1 | 1 | 1 | 1 | 1 | 45 |
| 1 | 1 | 2 | 1 | 1 | 1 | 47 |
| 2 | 1 | 2 | 1 | 3 | 2 | 40 |
| 2 | 2 | 3 | 1 | 1 | 1 | 21 |
| 1 | 1 | 1 | 3 | 2 | 1 | 55 |
| 4 | 2 | 2 | 2 | 2 | 1 | 26 |
| 2 | 2 | 2 | 2 | 2 | 2 | 44 |
| 1 | 1 | 1 | 1 | 1 | 1 | 46 |
| 1 | 4 | 4 | 4 | 3 | 4 | 22 |
| 1 | 1 | 1 | 1 | 1 | 1 | 56 |
| 2 | 2 | 2 | 2 | 2 | 1 | 52 |
| 2 | 1 | 2 | 1 | 1 | 1 | 45 |
| 1 | 1 | 1 | 1 | 1 | 1 | 43 |
| 3 | 2 | 4 | 2 | 4 | 2 | 42 |
| 2 | 1 | 4 | 3 | 1 | 3 | 21 |
| 2 | 1 | 1 | 2 | 1 | 1 | 35 |
| 1 | 1 | 4 | 3 | 2 | 1 | 38 |
| 1 | 1 | 4 | 1 | 1 | 1 | 21 |
| 1 | 1 | 1 | 1 | 1 | 1 | 21 |
| 1 | 1 | 2 | 1 | 1 | 1 | 55 |
| 1 | 1 | 1 | 1 | 3 | 1 | 51 |
| 1 | 1 | 1 | 1 | 1 | 1 | 64 |
| 1 | 1 | 1 | 1 | 1 | 1 | 25 |
| 3 | 2 | 2 | 2 | 3 | 2 | 58 |
| 2 | 4 | 2 | 2 | 2 | 3 | 40 |
| 4 | 2 | 1 | 2 | 4 | 1 | 33 |
| 1 | 1 | 1 | 1 | 1 | 1 | 33 |
| 1 | 2 | 3 | 1 | 2 | 3 | 21 |
| 2 | 1 | 2 | 2 | 2 | 1 | 26 |
| 1 | 1 | 1 | 1 | 1 | 1 | 42 |
| 1 | 1 | 3 | 1 | 1 | 1 | 25 |
| 1 | 1 | 1 | 1 | 1 | 1 | 21 |
| 1 | 1 | 1 | 2 | 1 | 1 | 36 |
| 1 | 1 | 3 | 2 | 3 | 2 | 67 |
| 1 | 1 | 1 | 1 | 1 | 1 | 53 |
| 1 | 1 | 1 | 1 | 1 | 1 | 59 |
| 1 | 1 | 3 | 1 | 1 | 1 | 51 |

|   |   |   |   |   |   |    |
|---|---|---|---|---|---|----|
| 3 | 3 | 3 | 3 | 4 | 2 | 38 |
| 3 | 2 | 3 | 4 | 2 | 2 | 33 |
| 1 | 1 | 4 | 4 | 4 | 1 | 44 |
| 1 | 1 | 4 | 1 | 4 | 4 | 27 |
| 2 | 1 | 2 | 1 | 1 | 1 | 26 |
| 1 | 1 | 1 | 2 | 1 | 1 | 37 |
| 1 | 1 | 2 | 3 | 3 | 1 | 65 |
| 1 | 1 | 1 | 1 | 1 | 1 | 21 |
| 1 | 1 | 1 | 1 | 1 | 1 | 44 |
| 2 | 1 | 2 | 3 | 2 | 1 | 36 |
| 2 | 3 | 4 | 4 | 1 | 4 | 35 |
| 1 | 1 | 1 | 1 | 1 | 1 | 42 |
| 1 | 1 | 2 | 4 | 1 | 1 | 51 |
| 1 | 1 | 2 | 1 | 1 | 1 | 27 |
| 2 | 1 | 2 | 1 | 1 | 1 | 50 |
| 1 | 1 | 4 | 1 | 3 | 1 | 63 |
| 1 | 1 | 3 | 2 | 4 | 2 | 29 |
| 1 | 1 | 1 | 1 | 1 | 1 | 21 |
| 2 | 1 | 2 | 4 | 2 | 1 | 84 |
| 3 | 3 | 3 | 3 | 3 | 3 | 51 |
| 2 | 1 | 2 | 1 | 1 | 1 | 41 |
| 1 | 1 | 1 | 1 | 1 | 1 | 45 |
| 4 | 4 | 4 | 4 | 4 | 4 | 40 |
| 2 | 1 | 3 | 3 | 2 | 2 | 47 |
| 2 | 2 | 1 | 2 | 2 | 2 | 35 |
| 1 | 4 | 3 | 1 | 1 | 2 | 29 |
| 2 | 1 | 2 | 1 | 2 | 2 | 48 |
| 2 | 2 | 1 | 2 | 2 | 2 | 33 |
| 2 | 1 | 2 | 1 | 1 | 1 | 45 |
| 1 | 1 | 2 | 1 | 1 | 1 | 39 |
| 2 | 2 | 2 | 2 | 2 | 4 | 21 |
| 2 | 1 | 4 | 2 | 1 | 2 | 38 |
| 2 | 2 | 2 | 2 | 2 | 2 | 21 |
| 1 | 1 | 2 | 1 | 2 | 1 | 21 |
| 1 | 1 | 1 | 1 | 1 | 1 | 31 |
| 2 | 2 | 2 | 1 | 2 | 2 | 42 |
| 1 | 1 | 1 | 1 | 1 | 1 | 41 |
| 1 | 1 | 1 | 1 | 1 | 1 | 55 |
| 1 | 1 | 1 | 1 | 1 | 1 | 54 |
| 2 | 2 | 2 | 2 | 2 | 2 | 38 |
| 2 | 1 | 1 | 1 | 1 | 1 | 28 |
| 1 | 1 | 2 | 2 | 3 | 1 | 34 |
| 3 | 1 | 4 | 3 | 3 | 2 | 57 |
| 2 | 2 | 2 | 1 | 2 | 2 | 40 |
| 1 | 1 | 2 | 1 | 1 | 1 | 41 |
| 2 | 1 | 1 | 1 | 1 | 1 | 47 |
| 1 | 1 | 2 | 3 | 4 | 1 | 30 |
| 1 | 1 | 2 | 3 | 2 | 1 | 45 |
| 1 | 1 | 2 | 1 | 1 | 1 | 52 |
| 2 | 1 | 2 | 1 | 2 | 1 | 21 |
| 1 | 1 | 2 | 1 | 1 | 1 | 27 |
| 1 | 3 | 4 | 2 | 2 | 1 | 26 |
| 1 | 1 | 3 | 2 | 2 | 2 | 27 |
| 1 | 1 | 1 | 1 | 1 | 1 | 30 |

|   |   |   |   |   |   |    |
|---|---|---|---|---|---|----|
| 1 | 1 | 2 | 1 | 1 | 1 | 35 |
| 1 | 1 | 1 | 1 | 1 | 1 | 32 |
| 1 | 1 | 2 | 1 | 1 | 1 | 24 |
| 1 | 1 | 1 | 1 | 1 | 1 | 26 |
| 1 | 1 | 2 | 1 | 2 | 2 | 84 |
| 2 | 1 | 1 | 1 | 1 | 1 | 55 |
| 1 | 1 | 1 | 1 | 1 | 1 | 28 |
| 1 | 1 | 2 | 1 | 1 | 1 | 49 |
| 4 | 4 | 4 | 4 | 4 | 4 | 32 |
| 2 | 4 | 2 | 3 | 3 | 1 | 27 |
| 1 | 1 | 1 | 1 | 1 | 1 | 33 |
| 3 | 1 | 4 | 1 | 1 | 3 | 29 |
| 1 | 1 | 1 | 1 | 1 | 1 | 30 |
| 1 | 1 | 2 | 1 | 1 | 1 | 38 |
| 1 | 1 | 2 | 2 | 2 | 1 | 46 |
| 1 | 1 | 1 | 1 | 1 | 1 | 26 |
| 1 | 1 | 2 | 1 | 1 | 1 | 23 |
| 2 | 2 | 3 | 1 | 1 | 2 | 36 |
| 2 | 3 | 2 | 3 | 2 | 2 | 41 |
| 1 | 1 | 1 | 1 | 1 | 1 | 27 |
| 1 | 1 | 1 | 1 | 1 | 1 | 37 |
| 1 | 1 | 2 | 1 | 1 | 1 | 28 |
| 2 | 1 | 4 | 2 | 1 | 1 | 35 |
| 1 | 1 | 1 | 1 | 1 | 1 | 71 |
| 1 | 1 | 4 | 1 | 1 | 2 | 44 |
| 1 | 1 | 1 | 2 | 1 | 2 | 28 |
| 1 | 2 | 1 | 1 | 1 | 2 | 28 |
| 4 | 3 | 4 | 4 | 3 | 1 | 33 |
| 2 | 2 | 4 | 1 | 1 | 2 | 26 |
| 1 | 1 | 1 | 1 | 1 | 4 | 56 |
| 1 | 1 | 1 | 1 | 1 | 1 | 41 |
| 1 | 1 | 3 | 1 | 1 | 1 | 40 |
| 1 | 1 | 1 | 1 | 1 | 1 | 28 |
| 2 | 2 | 4 | 3 | 3 | 2 | 52 |
| 3 | 1 | 2 | 2 | 2 | 2 | 28 |
| 1 | 1 | 2 | 1 | 1 | 2 | 60 |
| 1 | 1 | 1 | 1 | 1 | 1 | 46 |
| 1 | 2 | 4 | 1 | 1 | 2 | 43 |
| 2 | 1 | 1 | 1 | 1 | 1 | 64 |
| 3 | 2 | 2 | 3 | 2 | 2 | 25 |
| 1 | 1 | 4 | 4 | 1 | 1 | 40 |
| 2 | 2 | 2 | 2 | 2 | 2 | 35 |
| 1 | 1 | 2 | 4 | 1 | 1 | 24 |
| 1 | 1 | 2 | 1 | 1 | 1 | 21 |
| 1 | 1 | 2 | 2 | 2 | 1 | 25 |
| 2 | 1 | 2 | 1 | 2 | 1 | 32 |
| 1 | 1 | 1 | 1 | 1 | 1 | 36 |
| 1 | 1 | 1 | 1 | 1 | 1 | 21 |
| 1 | 1 | 1 | 1 | 2 | 1 | 21 |
| 1 | 1 | 1 | 1 | 1 | 1 | 54 |
| 1 | 1 | 1 | 2 | 2 | 1 | 31 |
| 1 | 1 | 1 | 1 | 1 | 1 | 59 |
| 1 | 1 | 1 | 1 | 1 | 1 | 33 |
| 2 | 2 | 4 | 2 | 3 | 1 | 28 |

|   |   |   |   |   |   |    |
|---|---|---|---|---|---|----|
| 1 | 1 | 1 | 1 | 1 | 1 | 41 |
| 4 | 4 | 1 | 1 | 1 | 1 | 21 |
| 2 | 1 | 2 | 1 | 1 | 1 | 84 |
| 1 | 1 | 2 | 1 | 2 | 1 | 35 |
| 1 | 1 | 2 | 1 | 1 | 1 | 34 |
| 1 | 1 | 1 | 1 | 1 | 1 | 54 |
| 4 | 4 | 4 | 4 | 4 | 4 | 53 |
| 1 | 1 | 1 | 1 | 1 | 1 | 44 |
| 1 | 1 | 2 | 1 | 1 | 1 | 35 |
| 2 | 2 | 2 | 2 | 2 | 1 | 26 |
| 2 | 1 | 3 | 1 | 1 | 1 | 42 |
| 1 | 1 | 1 | 1 | 1 | 1 | 40 |
| 1 | 1 | 1 | 1 | 1 | 1 | 42 |
| 1 | 1 | 2 | 1 | 1 | 1 | 21 |
| 2 | 1 | 2 | 1 | 1 | 1 | 29 |
| 1 | 1 | 2 | 2 | 1 | 1 | 61 |
| 2 | 2 | 2 | 2 | 2 | 2 | 35 |
| 1 | 1 | 1 | 1 | 1 | 1 | 50 |
| 1 | 1 | 1 | 1 | 1 | 1 | 31 |
| 4 | 3 | 2 | 1 | 3 | 2 | 37 |
| 2 | 1 | 3 | 1 | 2 | 1 | 42 |
| 1 | 1 | 4 | 4 | 3 | 1 | 59 |
| 1 | 1 | 1 | 2 | 1 | 1 | 24 |
| 1 | 1 | 4 | 1 | 1 | 2 | 24 |
| 2 | 2 | 2 | 2 | 2 | 2 | 44 |
| 4 | 4 | 1 | 2 | 4 | 2 | 37 |
| 1 | 1 | 1 | 1 | 1 | 1 | 57 |
| 1 | 1 | 1 | 1 | 1 | 1 | 60 |
| 1 | 1 | 1 | 1 | 2 | 1 | 70 |
| 2 | 1 | 2 | 1 | 1 | 2 | 44 |
| 3 | 3 | 3 | 3 | 3 | 3 | 33 |
| 4 | 1 | 4 | 3 | 4 | 2 | 35 |
| 4 | 4 | 4 | 3 | 1 | 4 | 25 |
| 2 | 2 | 2 | 2 | 2 | 2 | 46 |
| 1 | 1 | 2 | 2 | 2 | 1 | 23 |
| 1 | 1 | 2 | 1 | 2 | 1 | 22 |
| 1 | 1 | 1 | 1 | 1 | 1 | 26 |
| 1 | 1 | 4 | 2 | 4 | 1 | 34 |
| 1 | 1 | 1 | 1 | 1 | 1 | 59 |
| 1 | 1 | 1 | 1 | 1 | 1 | 36 |
| 1 | 1 | 1 | 1 | 1 | 1 | 21 |
| 2 | 1 | 2 | 1 | 2 | 1 | 82 |
| 2 | 1 | 1 | 2 | 4 | 2 | 21 |
| 1 | 1 | 1 | 1 | 1 | 1 | 25 |
| 4 | 3 | 4 | 4 | 4 | 4 | 28 |
| 1 | 1 | 1 | 1 | 1 | 1 | 56 |
| 1 | 1 | 2 | 1 | 1 | 1 | 46 |
| 1 | 1 | 1 | 1 | 1 | 1 | 46 |
| 3 | 2 | 3 | 2 | 2 | 2 | 32 |
| 2 | 1 | 3 | 2 | 3 | 2 | 22 |
| 2 | 1 | 3 | 2 | 3 | 2 | 33 |
| 1 | 1 | 1 | 1 | 1 | 1 | 34 |
| 1 | 1 | 1 | 1 | 1 | 1 | 26 |
| 1 | 1 | 1 | 1 | 1 | 1 | 33 |



|   |   |   |   |   |   |    |
|---|---|---|---|---|---|----|
| 1 | 1 | 2 | 1 | 1 | 1 | 41 |
| 1 | 1 | 1 | 1 | 1 | 1 | 84 |
| 1 | 1 | 4 | 1 | 1 | 1 | 43 |
| 2 | 2 | 2 | 2 | 2 | 1 | 61 |
| 4 | 4 | 4 | 4 | 4 | 4 | 23 |
| 2 | 2 | 2 | 2 | 2 | 2 | 34 |
| 3 | 3 | 3 | 3 | 3 | 3 | 40 |
| 1 | 1 | 1 | 1 | 1 | 1 | 35 |
| 1 | 1 | 2 | 1 | 1 | 1 | 56 |
| 1 | 1 | 4 | 2 | 3 | 1 | 39 |
| 1 | 1 | 2 | 2 | 2 | 1 | 25 |
| 3 | 2 | 3 | 2 | 2 | 2 | 21 |
| 2 | 1 | 2 | 2 | 2 | 1 | 22 |
| 1 | 1 | 1 | 1 | 1 | 1 | 72 |
| 1 | 1 | 1 | 1 | 1 | 1 | 24 |
| 1 | 1 | 1 | 1 | 1 | 1 | 21 |
| 4 | 1 | 4 | 4 | 3 | 1 | 50 |
| 1 | 1 | 1 | 1 | 1 | 1 | 48 |
| 1 | 1 | 1 | 1 | 1 | 1 | 30 |
| 2 | 2 | 3 | 2 | 3 | 1 | 35 |
| 2 | 1 | 3 | 3 | 3 | 3 | 34 |
| 1 | 1 | 1 | 1 | 1 | 1 | 63 |
| 1 | 1 | 2 | 2 | 1 | 1 | 45 |
| 4 | 2 | 1 | 1 | 1 | 1 | 55 |
| 3 | 3 | 3 | 3 | 3 | 3 | 59 |
| 1 | 1 | 3 | 1 | 1 | 1 | 62 |
| 2 | 2 | 3 | 3 | 3 | 2 | 21 |
| 3 | 3 | 3 | 3 | 3 | 3 | 32 |
| 4 | 3 | 2 | 4 | 2 | 3 | 21 |
| 1 | 1 | 1 | 1 | 1 | 1 | 24 |
| 2 | 1 | 1 | 1 | 1 | 1 | 29 |
| 1 | 1 | 1 | 1 | 1 | 1 | 38 |
| 1 | 1 | 1 | 1 | 1 | 1 | 55 |
| 1 | 1 | 1 | 1 | 1 | 1 | 21 |
| 1 | 1 | 3 | 1 | 1 | 2 | 29 |
| 2 | 2 | 2 | 2 | 2 | 2 | 25 |
| 1 | 1 | 1 | 1 | 1 | 1 | 52 |
| 1 | 1 | 2 | 1 | 2 | 1 | 47 |
| 1 | 1 | 1 | 1 | 1 | 1 | 36 |
| 2 | 3 | 2 | 2 | 2 | 2 | 28 |
| 2 | 3 | 3 | 2 | 1 | 1 | 23 |
| 1 | 1 | 3 | 2 | 1 | 1 | 50 |
| 1 | 1 | 1 | 1 | 1 | 1 | 34 |
| 1 | 1 | 1 | 1 | 1 | 1 | 41 |
| 2 | 2 | 2 | 2 | 2 | 2 | 21 |
| 2 | 1 | 2 | 1 | 2 | 1 | 25 |
| 2 | 2 | 2 | 2 | 2 | 1 | 54 |
| 1 | 1 | 1 | 1 | 1 | 1 | 33 |
| 1 | 1 | 1 | 1 | 1 | 1 | 22 |
| 2 | 2 | 3 | 3 | 3 | 2 | 26 |
| 1 | 1 | 1 | 3 | 1 | 1 | 62 |
| 1 | 1 | 1 | 1 | 1 | 1 | 28 |
| 1 | 1 | 1 | 1 | 1 | 1 | 26 |
| 3 | 2 | 3 | 3 | 3 | 4 | 41 |

|   |   |   |   |   |   |    |
|---|---|---|---|---|---|----|
| 1 | 1 | 1 | 1 | 1 | 1 | 21 |
| 1 | 1 | 1 | 1 | 1 | 1 | 84 |
| 1 | 1 | 2 | 2 | 2 | 1 | 47 |
| 1 | 1 | 1 | 1 | 1 | 1 | 29 |
| 4 | 4 | 4 | 4 | 4 | 4 | 60 |
| 3 | 2 | 2 | 2 | 2 | 2 | 33 |
| 1 | 1 | 1 | 1 | 1 | 1 | 84 |
| 3 | 4 | 3 | 3 | 2 | 2 | 34 |
| 1 | 1 | 2 | 1 | 1 | 1 | 33 |
| 4 | 4 | 4 | 4 | 4 | 4 | 63 |
| 1 | 1 | 2 | 1 | 1 | 1 | 42 |
| 1 | 1 | 3 | 2 | 2 | 1 | 44 |
| 3 | 3 | 3 | 3 | 3 | 3 | 84 |
| 1 | 1 | 2 | 2 | 2 | 1 | 25 |
| 1 | 1 | 2 | 2 | 2 | 1 | 34 |
| 4 | 4 | 4 | 4 | 4 | 4 | 63 |
| 1 | 1 | 1 | 1 | 1 | 1 | 49 |
| 1 | 1 | 1 | 2 | 2 | 1 | 43 |
| 3 | 3 | 3 | 3 | 3 | 3 | 58 |
| 2 | 2 | 3 | 1 | 3 | 2 | 22 |
| 2 | 2 | 2 | 1 | 1 | 2 | 28 |
| 3 | 3 | 3 | 3 | 3 | 3 | 22 |
| 1 | 1 | 1 | 1 | 1 | 1 | 35 |
| 1 | 1 | 1 | 2 | 1 | 1 | 34 |
| 1 | 1 | 1 | 1 | 1 | 1 | 33 |
| 1 | 1 | 2 | 1 | 2 | 1 | 40 |
| 4 | 2 | 2 | 2 | 2 | 2 | 28 |
| 3 | 1 | 2 | 1 | 1 | 1 | 41 |
| 1 | 1 | 2 | 1 | 1 | 1 | 45 |
| 2 | 2 | 2 | 2 | 2 | 1 | 49 |
| 1 | 1 | 2 | 1 | 1 | 1 | 22 |
| 1 | 1 | 3 | 2 | 2 | 1 | 29 |
| 3 | 1 | 1 | 1 | 1 | 1 | 48 |
| 2 | 2 | 4 | 2 | 3 | 1 | 31 |
| 1 | 1 | 1 | 1 | 1 | 1 | 33 |
| 1 | 1 | 3 | 1 | 1 | 1 | 84 |
| 4 | 4 | 2 | 2 | 2 | 4 | 34 |
| 1 | 1 | 1 | 1 | 1 | 1 | 53 |
| 1 | 1 | 1 | 1 | 1 | 1 | 49 |
| 4 | 4 | 4 | 4 | 4 | 4 | 27 |
| 3 | 1 | 1 | 1 | 1 | 2 | 63 |
| 2 | 1 | 3 | 3 | 2 | 1 | 36 |
| 2 | 2 | 2 | 3 | 2 | 2 | 30 |
| 1 | 1 | 1 | 1 | 1 | 1 | 27 |
| 4 | 2 | 3 | 4 | 4 | 1 | 21 |
| 2 | 1 | 2 | 2 | 1 | 1 | 66 |
| 1 | 1 | 2 | 2 | 1 | 1 | 54 |
| 1 | 1 | 1 | 1 | 1 | 1 | 59 |
| 1 | 1 | 1 | 1 | 1 | 1 | 49 |
| 3 | 3 | 3 | 3 | 3 | 3 | 41 |
| 2 | 2 | 4 | 2 | 3 | 3 | 26 |
| 3 | 3 | 3 | 2 | 2 | 3 | 21 |
| 2 | 2 | 2 | 3 | 2 | 3 | 52 |
| 2 | 2 | 2 | 2 | 2 | 2 | 42 |

|   |   |   |   |   |   |    |
|---|---|---|---|---|---|----|
| 1 | 1 | 1 | 1 | 1 | 1 | 41 |
| 1 | 1 | 1 | 1 | 1 | 1 | 21 |
| 2 | 3 | 2 | 2 | 2 | 2 | 26 |
| 2 | 1 | 2 | 2 | 2 | 2 | 23 |
| 2 | 1 | 2 | 2 | 2 | 1 | 54 |
| 1 | 1 | 1 | 1 | 1 | 1 | 41 |
| 1 | 1 | 1 | 1 | 1 | 1 | 28 |
| 1 | 1 | 1 | 1 | 1 | 1 | 74 |
| 3 | 2 | 4 | 3 | 3 | 2 | 45 |
| 1 | 1 | 3 | 1 | 1 | 1 | 31 |
| 2 | 1 | 2 | 1 | 1 | 1 | 29 |
| 3 | 3 | 4 | 4 | 4 | 3 | 36 |
| 2 | 1 | 2 | 2 | 2 | 1 | 31 |
| 1 | 1 | 1 | 1 | 1 | 1 | 29 |
| 1 | 1 | 1 | 1 | 1 | 1 | 36 |
| 1 | 1 | 3 | 1 | 1 | 1 | 57 |
| 1 | 1 | 1 | 1 | 2 | 1 | 40 |
| 1 | 1 | 1 | 1 | 2 | 1 | 21 |
| 1 | 1 | 4 | 1 | 1 | 1 | 43 |
| 3 | 3 | 3 | 2 | 2 | 2 | 26 |
| 1 | 1 | 3 | 1 | 1 | 1 | 43 |
| 1 | 1 | 1 | 1 | 1 | 1 | 26 |
| 2 | 2 | 2 | 2 | 2 | 2 | 27 |
| 1 | 1 | 1 | 1 | 1 | 1 | 31 |
| 2 | 2 | 2 | 2 | 2 | 2 | 37 |
| 1 | 1 | 1 | 2 | 1 | 1 | 84 |
| 1 | 1 | 1 | 1 | 1 | 1 | 27 |
| 1 | 1 | 1 | 1 | 1 | 1 | 40 |
| 1 | 1 | 2 | 1 | 2 | 2 | 36 |
| 4 | 4 | 4 | 4 | 4 | 4 | 33 |
| 1 | 1 | 2 | 1 | 1 | 1 | 31 |
| 2 | 1 | 2 | 2 | 2 | 1 | 28 |
| 1 | 1 | 2 | 1 | 1 | 1 | 71 |
| 1 | 1 | 3 | 1 | 1 | 1 | 39 |
| 1 | 1 | 2 | 2 | 2 | 1 | 40 |
| 1 | 1 | 1 | 1 | 3 | 1 | 33 |
| 4 | 4 | 4 | 4 | 4 | 4 | 30 |
| 2 | 1 | 2 | 2 | 1 | 1 | 32 |
| 2 | 1 | 2 | 2 | 2 | 1 | 40 |
| 1 | 1 | 2 | 1 | 1 | 1 | 21 |
| 1 | 1 | 1 | 1 | 1 | 1 | 63 |
| 2 | 1 | 3 | 2 | 2 | 1 | 35 |
| 1 | 1 | 2 | 2 | 4 | 1 | 23 |
| 1 | 1 | 1 | 1 | 1 | 1 | 45 |
| 3 | 3 | 3 | 3 | 3 | 3 | 84 |
| 1 | 1 | 2 | 3 | 1 | 1 | 23 |
| 1 | 1 | 1 | 1 | 1 | 1 | 40 |
| 2 | 1 | 1 | 2 | 4 | 1 | 42 |
| 4 | 4 | 4 | 4 | 4 | 4 | 29 |
| 1 | 1 | 1 | 1 | 1 | 1 | 30 |
| 1 | 1 | 3 | 1 | 1 | 1 | 38 |
| 2 | 2 | 2 | 2 | 1 | 2 | 63 |
| 1 | 1 | 2 | 1 | 1 | 1 | 63 |
| 2 | 1 | 2 | 1 | 1 | 1 | 45 |

|   |   |   |   |   |   |    |
|---|---|---|---|---|---|----|
| 1 | 1 | 3 | 1 | 1 | 1 | 53 |
| 2 | 1 | 3 | 2 | 4 | 3 | 26 |
| 3 | 3 | 3 | 3 | 3 | 3 | 25 |
| 2 | 1 | 3 | 2 | 2 | 1 | 42 |
| 1 | 1 | 4 | 4 | 2 | 1 | 23 |
| 1 | 1 | 1 | 1 | 1 | 1 | 84 |
| 1 | 1 | 1 | 1 | 1 | 1 | 22 |
| 2 | 2 | 2 | 2 | 1 | 2 | 22 |
| 1 | 1 | 1 | 1 | 1 | 1 | 42 |
| 4 | 4 | 4 | 4 | 4 | 4 | 32 |
| 1 | 1 | 1 | 1 | 1 | 1 | 42 |
| 1 | 1 | 1 | 1 | 1 | 1 | 21 |
| 2 | 2 | 2 | 2 | 2 | 1 | 25 |
| 1 | 1 | 1 | 1 | 1 | 1 | 40 |
| 1 | 1 | 3 | 1 | 3 | 2 | 35 |
| 1 | 1 | 1 | 1 | 1 | 1 | 42 |
| 1 | 1 | 1 | 1 | 1 | 1 | 50 |
| 2 | 1 | 2 | 2 | 1 | 1 | 24 |
| 1 | 1 | 2 | 1 | 1 | 1 | 35 |
| 1 | 1 | 2 | 1 | 2 | 1 | 30 |
| 2 | 2 | 2 | 2 | 2 | 2 | 34 |
| 1 | 1 | 2 | 1 | 1 | 1 | 59 |
| 2 | 1 | 2 | 1 | 1 | 1 | 22 |
| 1 | 1 | 1 | 1 | 1 | 1 | 25 |
| 1 | 1 | 1 | 1 | 1 | 1 | 84 |
| 1 | 2 | 3 | 3 | 4 | 1 | 24 |
| 1 | 1 | 1 | 1 | 1 | 1 | 41 |
| 1 | 1 | 1 | 1 | 1 | 1 | 43 |
| 4 | 4 | 4 | 4 | 4 | 4 | 53 |
| 1 | 1 | 1 | 1 | 1 | 1 | 25 |
| 2 | 2 | 2 | 2 | 2 | 1 | 21 |
| 1 | 1 | 4 | 2 | 4 | 1 | 37 |
| 2 | 1 | 3 | 2 | 2 | 2 | 23 |
| 1 | 1 | 1 | 1 | 1 | 1 | 50 |
| 1 | 1 | 1 | 1 | 1 | 1 | 63 |
| 2 | 1 | 2 | 1 | 2 | 1 | 32 |
| 1 | 1 | 1 | 1 | 1 | 1 | 42 |
| 3 | 2 | 2 | 3 | 3 | 2 | 35 |
| 3 | 3 | 3 | 3 | 3 | 3 | 32 |
| 1 | 1 | 2 | 1 | 1 | 1 | 28 |
| 2 | 1 | 4 | 1 | 1 | 1 | 25 |
| 1 | 1 | 2 | 1 | 1 | 1 | 25 |
| 1 | 1 | 2 | 2 | 1 | 1 | 60 |
| 1 | 1 | 2 | 1 | 1 | 1 | 25 |
| 1 | 1 | 1 | 1 | 1 | 1 | 42 |
| 1 | 1 | 1 | 1 | 1 | 1 | 38 |
| 3 | 4 | 3 | 3 | 2 | 2 | 42 |
| 1 | 1 | 1 | 1 | 1 | 1 | 62 |
| 1 | 1 | 2 | 1 | 1 | 2 | 59 |
| 1 | 1 | 1 | 1 | 2 | 1 | 58 |
| 2 | 2 | 2 | 2 | 2 | 2 | 40 |
| 3 | 4 | 1 | 4 | 4 | 4 | 78 |
| 2 | 1 | 4 | 3 | 4 | 1 | 21 |
| 4 | 2 | 4 | 4 | 3 | 2 | 56 |

|   |   |   |   |   |   |    |
|---|---|---|---|---|---|----|
| 2 | 2 | 2 | 2 | 2 | 2 | 41 |
| 4 | 4 | 4 | 4 | 4 | 4 | 27 |
| 1 | 1 | 1 | 1 | 1 | 1 | 28 |
| 2 | 3 | 2 | 3 | 2 | 3 | 35 |
| 2 | 2 | 2 | 2 | 2 | 1 | 30 |
| 1 | 1 | 1 | 1 | 1 | 1 | 26 |
| 1 | 1 | 1 | 1 | 1 | 1 | 47 |
| 2 | 1 | 2 | 3 | 2 | 1 | 23 |
| 2 | 1 | 1 | 1 | 1 | 1 | 25 |
| 2 | 1 | 1 | 1 | 1 | 1 | 22 |
| 2 | 1 | 3 | 2 | 1 | 1 | 28 |
| 1 | 1 | 1 | 1 | 1 | 1 | 51 |
| 1 | 1 | 1 | 1 | 1 | 1 | 35 |
| 1 | 1 | 1 | 1 | 1 | 1 | 41 |
| 1 | 1 | 1 | 1 | 1 | 1 | 23 |
| 2 | 1 | 2 | 3 | 3 | 1 | 44 |
| 1 | 1 | 1 | 1 | 3 | 1 | 42 |
| 2 | 1 | 2 | 1 | 1 | 1 | 43 |
| 1 | 1 | 1 | 1 | 1 | 1 | 58 |
| 1 | 1 | 2 | 3 | 3 | 1 | 60 |
| 1 | 1 | 3 | 1 | 3 | 2 | 37 |
| 2 | 2 | 2 | 2 | 2 | 1 | 31 |
| 3 | 2 | 2 | 2 | 2 | 2 | 49 |
| 3 | 3 | 3 | 3 | 3 | 3 | 47 |
| 1 | 1 | 2 | 2 | 2 | 1 | 73 |
| 1 | 1 | 1 | 1 | 1 | 1 | 38 |
| 2 | 1 | 3 | 3 | 3 | 1 | 39 |
| 2 | 3 | 3 | 2 | 1 | 1 | 41 |
| 3 | 4 | 4 | 3 | 3 | 4 | 40 |
| 2 | 1 | 2 | 2 | 1 | 1 | 63 |
| 1 | 1 | 1 | 1 | 1 | 1 | 24 |
| 1 | 1 | 3 | 2 | 2 | 1 | 84 |
| 3 | 2 | 2 | 2 | 1 | 1 | 84 |
| 3 | 3 | 3 | 3 | 3 | 3 | 42 |
| 1 | 1 | 1 | 1 | 1 | 1 | 66 |
| 4 | 4 | 4 | 4 | 4 | 4 | 25 |
| 4 | 4 | 4 | 4 | 4 | 4 | 63 |
| 2 | 2 | 2 | 2 | 2 | 2 | 57 |
| 3 | 4 | 4 | 3 | 4 | 3 | 22 |
| 1 | 1 | 4 | 2 | 1 | 1 | 23 |
| 3 | 3 | 3 | 3 | 3 | 3 | 42 |
| 3 | 3 | 3 | 3 | 3 | 3 | 39 |
| 1 | 1 | 1 | 1 | 1 | 1 | 26 |
| 1 | 1 | 1 | 1 | 1 | 1 | 40 |
| 2 | 2 | 2 | 2 | 2 | 2 | 35 |
| 1 | 1 | 1 | 1 | 2 | 1 | 84 |
| 1 | 1 | 1 | 1 | 1 | 1 | 42 |
| 1 | 1 | 2 | 2 | 2 | 1 | 33 |
| 1 | 1 | 2 | 2 | 1 | 1 | 25 |
| 4 | 4 | 4 | 4 | 4 | 4 | 25 |
| 2 | 2 | 2 | 2 | 2 | 2 | 21 |
| 1 | 1 | 2 | 2 | 1 | 1 | 27 |
| 2 | 1 | 2 | 1 | 1 | 1 | 22 |
| 1 | 1 | 1 | 1 | 1 | 1 | 40 |

|   |   |   |   |   |   |    |
|---|---|---|---|---|---|----|
| 1 | 1 | 1 | 1 | 1 | 1 | 41 |
| 1 | 1 | 1 | 1 | 1 | 1 | 21 |
| 1 | 1 | 1 | 1 | 1 | 1 | 38 |
| 2 | 1 | 3 | 2 | 2 | 1 | 27 |
| 2 | 2 | 3 | 2 | 1 | 1 | 27 |
| 1 | 1 | 1 | 1 | 1 | 1 | 43 |
| 1 | 1 | 2 | 2 | 2 | 1 | 30 |
| 1 | 1 | 1 | 1 | 1 | 1 | 52 |
| 1 | 1 | 1 | 1 | 1 | 1 | 26 |
| 1 | 1 | 2 | 2 | 3 | 1 | 42 |
| 1 | 1 | 2 | 1 | 1 | 1 | 29 |
| 2 | 2 | 2 | 2 | 3 | 2 | 41 |
| 1 | 1 | 1 | 1 | 1 | 1 | 41 |
| 3 | 1 | 3 | 1 | 1 | 1 | 31 |
| 1 | 1 | 1 | 1 | 1 | 1 | 27 |
| 1 | 1 | 2 | 1 | 1 | 1 | 31 |
| 1 | 1 | 2 | 1 | 2 | 2 | 28 |
| 2 | 1 | 1 | 1 | 1 | 1 | 29 |
| 1 | 1 | 1 | 1 | 1 | 1 | 63 |
| 1 | 1 | 1 | 3 | 1 | 1 | 61 |
| 1 | 1 | 1 | 1 | 2 | 1 | 40 |
| 1 | 1 | 1 | 1 | 1 | 1 | 39 |
| 3 | 3 | 3 | 3 | 3 | 2 | 43 |
| 3 | 3 | 3 | 1 | 3 | 4 | 36 |
| 1 | 1 | 3 | 1 | 2 | 1 | 50 |
| 1 | 1 | 2 | 1 | 1 | 1 | 75 |
| 2 | 2 | 2 | 2 | 2 | 2 | 21 |
| 1 | 1 | 2 | 2 | 2 | 1 | 29 |
| 2 | 2 | 2 | 2 | 2 | 2 | 84 |
| 2 | 4 | 4 | 2 | 4 | 3 | 29 |
| 1 | 1 | 1 | 1 | 1 | 1 | 24 |
| 1 | 1 | 1 | 1 | 1 | 1 | 42 |
| 4 | 4 | 4 | 4 | 4 | 4 | 22 |
| 1 | 1 | 1 | 1 | 1 | 1 | 42 |
| 1 | 1 | 1 | 1 | 1 | 1 | 21 |
| 3 | 1 | 3 | 1 | 1 | 1 | 33 |
| 1 | 1 | 1 | 1 | 1 | 1 | 84 |
| 2 | 2 | 2 | 2 | 2 | 2 | 21 |
| 1 | 1 | 1 | 1 | 1 | 1 | 23 |
| 2 | 1 | 1 | 2 | 2 | 1 | 28 |
| 4 | 4 | 4 | 4 | 4 | 4 | 29 |
| 1 | 1 | 1 | 1 | 1 | 1 | 84 |
| 1 | 1 | 1 | 1 | 1 | 1 | 55 |
| 1 | 1 | 1 | 2 | 1 | 2 | 41 |
| 1 | 1 | 2 | 1 | 1 | 2 | 37 |
| 4 | 4 | 4 | 4 | 4 | 4 | 53 |
| 1 | 1 | 3 | 4 | 2 | 1 | 77 |
| 2 | 1 | 1 | 1 | 1 | 1 | 23 |
| 2 | 1 | 2 | 3 | 2 | 1 | 21 |
| 3 | 2 | 1 | 3 | 1 | 1 | 27 |
| 4 | 4 | 4 | 4 | 4 | 3 | 30 |
| 1 | 1 | 1 | 1 | 1 | 1 | 70 |
| 1 | 1 | 1 | 1 | 1 | 1 | 39 |
| 1 | 1 | 1 | 1 | 1 | 1 | 26 |

|   |   |   |   |   |   |    |
|---|---|---|---|---|---|----|
| 1 | 1 | 1 | 1 | 1 | 1 | 68 |
| 3 | 1 | 3 | 3 | 3 | 3 | 34 |
| 1 | 1 | 3 | 1 | 1 | 1 | 41 |
| 1 | 1 | 1 | 1 | 1 | 1 | 63 |
| 4 | 2 | 2 | 1 | 4 | 2 | 84 |
| 1 | 1 | 4 | 1 | 1 | 1 | 27 |
| 2 | 1 | 3 | 1 | 3 | 2 | 29 |
| 3 | 3 | 3 | 3 | 3 | 3 | 63 |
| 4 | 4 | 4 | 4 | 4 | 4 | 21 |
| 1 | 1 | 1 | 1 | 1 | 1 | 21 |
| 1 | 1 | 2 | 1 | 1 | 1 | 24 |
| 3 | 3 | 3 | 3 | 3 | 3 | 43 |
| 1 | 1 | 1 | 1 | 1 | 1 | 27 |
| 1 | 1 | 1 | 1 | 1 | 1 | 21 |
| 1 | 1 | 1 | 1 | 1 | 1 | 40 |
| 1 | 1 | 2 | 2 | 2 | 1 | 31 |
| 1 | 1 | 1 | 1 | 1 | 1 | 55 |
| 1 | 1 | 1 | 1 | 1 | 1 | 21 |
| 3 | 2 | 1 | 4 | 3 | 2 | 22 |
| 2 | 1 | 2 | 1 | 1 | 1 | 37 |
| 3 | 1 | 3 | 2 | 1 | 2 | 25 |
| 1 | 1 | 1 | 1 | 1 | 1 | 34 |
| 1 | 1 | 1 | 1 | 1 | 1 | 27 |
| 2 | 1 | 1 | 2 | 1 | 1 | 23 |
| 1 | 1 | 3 | 1 | 1 | 1 | 35 |
| 1 | 1 | 1 | 1 | 1 | 1 | 31 |
| 1 | 1 | 2 | 1 | 1 | 1 | 44 |
| 1 | 1 | 1 | 1 | 1 | 1 | 36 |
| 1 | 1 | 1 | 2 | 2 | 1 | 21 |
| 2 | 1 | 2 | 1 | 1 | 1 | 27 |
| 1 | 1 | 4 | 2 | 2 | 2 | 39 |
| 1 | 1 | 1 | 1 | 1 | 1 | 46 |
| 1 | 1 | 1 | 1 | 1 | 1 | 48 |
| 1 | 1 | 1 | 1 | 1 | 1 | 21 |
| 1 | 1 | 2 | 2 | 2 | 1 | 41 |
| 2 | 1 | 2 | 1 | 3 | 1 | 40 |
| 2 | 3 | 4 | 4 | 4 | 1 | 27 |
| 1 | 1 | 1 | 1 | 1 | 1 | 21 |
| 1 | 1 | 2 | 2 | 2 | 1 | 24 |
| 1 | 1 | 2 | 2 | 2 | 1 | 26 |
| 1 | 1 | 1 | 1 | 1 | 1 | 22 |
| 1 | 1 | 1 | 1 | 1 | 1 | 33 |
| 1 | 1 | 1 | 1 | 1 | 1 | 30 |
| 1 | 1 | 1 | 1 | 1 | 1 | 37 |
| 1 | 1 | 1 | 1 | 1 | 1 | 28 |
| 2 | 1 | 3 | 2 | 1 | 1 | 46 |
| 1 | 1 | 1 | 1 | 1 | 1 | 54 |
| 1 | 1 | 3 | 1 | 2 | 1 | 59 |
| 2 | 1 | 2 | 2 | 1 | 1 | 33 |
| 3 | 2 | 4 | 3 | 3 | 2 | 21 |
| 3 | 3 | 3 | 2 | 2 | 1 | 56 |
| 2 | 1 | 3 | 2 | 1 | 1 | 61 |
| 1 | 1 | 1 | 1 | 1 | 1 | 35 |
| 1 | 1 | 4 | 1 | 4 | 1 | 22 |

|   |   |   |   |   |   |    |
|---|---|---|---|---|---|----|
| 3 | 3 | 3 | 3 | 3 | 3 | 42 |
| 1 | 1 | 2 | 1 | 1 | 1 | 64 |
| 1 | 1 | 1 | 1 | 1 | 1 | 21 |
| 2 | 2 | 2 | 2 | 2 | 2 | 74 |
| 1 | 1 | 1 | 1 | 2 | 4 | 50 |
| 1 | 1 | 1 | 1 | 1 | 1 | 52 |
| 4 | 3 | 4 | 2 | 3 | 1 | 21 |
| 3 | 1 | 2 | 1 | 4 | 4 | 21 |
| 1 | 1 | 1 | 2 | 4 | 1 | 45 |
| 1 | 1 | 1 | 1 | 1 | 1 | 21 |
| 1 | 1 | 1 | 1 | 1 | 1 | 64 |
| 2 | 2 | 3 | 2 | 3 | 1 | 35 |
| 1 | 1 | 1 | 1 | 1 | 1 | 52 |
| 3 | 3 | 3 | 3 | 3 | 3 | 35 |
| 1 | 1 | 1 | 2 | 1 | 1 | 21 |
| 2 | 1 | 4 | 1 | 1 | 1 | 25 |
| 1 | 1 | 1 | 2 | 1 | 1 | 35 |
| 1 | 1 | 1 | 1 | 1 | 1 | 21 |
| 1 | 1 | 1 | 1 | 1 | 1 | 63 |
| 1 | 2 | 2 | 1 | 1 | 1 | 21 |
| 1 | 1 | 1 | 1 | 1 | 1 | 30 |
| 3 | 3 | 3 | 3 | 3 | 3 | 41 |
| 1 | 1 | 1 | 1 | 1 | 1 | 57 |
| 1 | 1 | 1 | 1 | 1 | 1 | 63 |
| 2 | 2 | 2 | 2 | 2 | 1 | 25 |
| 3 | 3 | 3 | 2 | 3 | 2 | 31 |
| 3 | 3 | 3 | 3 | 3 | 3 | 23 |
| 1 | 1 | 1 | 1 | 1 | 1 | 38 |
| 1 | 1 | 1 | 1 | 1 | 1 | 29 |
| 1 | 1 | 3 | 1 | 2 | 1 | 43 |
| 1 | 1 | 1 | 2 | 1 | 1 | 27 |
| 2 | 2 | 2 | 2 | 2 | 2 | 37 |
| 1 | 1 | 2 | 1 | 1 | 1 | 35 |
| 2 | 1 | 2 | 1 | 2 | 1 | 36 |
| 2 | 1 | 2 | 1 | 1 | 1 | 49 |
| 1 | 1 | 2 | 1 | 1 | 1 | 38 |
| 1 | 1 | 1 | 1 | 1 | 1 | 24 |
| 1 | 1 | 1 | 1 | 1 | 1 | 23 |
| 1 | 1 | 1 | 1 | 1 | 1 | 28 |
| 2 | 1 | 2 | 2 | 3 | 3 | 57 |
| 1 | 1 | 2 | 1 | 1 | 1 | 40 |
| 1 | 1 | 1 | 1 | 1 | 1 | 23 |
| 1 | 1 | 1 | 1 | 1 | 1 | 25 |
| 1 | 2 | 2 | 3 | 2 | 4 | 47 |
| 4 | 4 | 4 | 4 | 4 | 4 | 84 |
| 1 | 1 | 1 | 1 | 1 | 1 | 21 |
| 1 | 2 | 2 | 2 | 2 | 1 | 43 |
| 1 | 1 | 1 | 1 | 1 | 1 | 34 |
| 1 | 1 | 1 | 1 | 1 | 1 | 29 |
| 1 | 1 | 1 | 1 | 1 | 1 | 23 |
| 1 | 1 | 1 | 1 | 1 | 1 | 23 |
| 1 | 1 | 1 | 1 | 1 | 1 | 21 |
| 2 | 2 | 2 | 2 | 2 | 2 | 42 |
| 1 | 1 | 1 | 2 | 2 | 1 | 46 |



|   |   |   |   |   |   |    |
|---|---|---|---|---|---|----|
| 1 | 1 | 1 | 1 | 1 | 1 | 24 |
| 2 | 1 | 2 | 1 | 3 | 2 | 51 |
| 2 | 3 | 4 | 2 | 2 | 3 | 55 |
| 1 | 1 | 1 | 1 | 1 | 1 | 22 |
| 2 | 1 | 1 | 2 | 2 | 1 | 45 |
| 1 | 1 | 1 | 2 | 4 | 1 | 51 |
| 1 | 1 | 1 | 1 | 1 | 1 | 31 |
| 2 | 1 | 3 | 1 | 2 | 1 | 46 |
| 1 | 1 | 1 | 1 | 1 | 1 | 30 |
| 1 | 1 | 1 | 1 | 1 | 1 | 21 |
| 1 | 1 | 1 | 1 | 1 | 1 | 21 |
| 4 | 4 | 4 | 4 | 4 | 4 | 84 |
| 1 | 1 | 1 | 1 | 1 | 2 | 27 |
| 2 | 1 | 2 | 2 | 2 | 1 | 43 |
| 2 | 1 | 3 | 1 | 1 | 3 | 32 |
| 3 | 3 | 3 | 3 | 3 | 3 | 70 |
| 1 | 1 | 1 | 1 | 1 | 1 | 28 |
| 3 | 1 | 3 | 4 | 3 | 2 | 58 |
| 2 | 1 | 3 | 2 | 2 | 1 | 44 |
| 1 | 1 | 1 | 1 | 1 | 1 | 25 |
| 1 | 1 | 2 | 1 | 1 | 1 | 32 |
| 3 | 3 | 3 | 3 | 3 | 3 | 63 |
| 2 | 1 | 1 | 1 | 1 | 3 | 40 |
| 4 | 2 | 4 | 4 | 4 | 1 | 71 |
| 2 | 4 | 4 | 2 | 4 | 3 | 60 |
| 1 | 1 | 2 | 1 | 1 | 1 | 30 |
| 1 | 1 | 1 | 1 | 1 | 1 | 23 |
| 4 | 2 | 2 | 1 | 4 | 4 | 66 |
| 2 | 2 | 2 | 3 | 1 | 3 | 46 |
| 1 | 1 | 1 | 2 | 2 | 1 | 38 |
| 1 | 1 | 1 | 1 | 1 | 1 | 26 |
| 2 | 1 | 3 | 3 | 2 | 1 | 41 |
| 2 | 2 | 3 | 2 | 2 | 2 | 44 |
| 1 | 1 | 1 | 1 | 1 | 1 | 31 |
| 1 | 1 | 1 | 1 | 1 | 1 | 47 |
| 4 | 2 | 4 | 4 | 4 | 1 | 71 |
| 2 | 1 | 1 | 1 | 2 | 1 | 35 |
| 1 | 1 | 3 | 2 | 1 | 1 | 31 |
| 2 | 1 | 1 | 2 | 2 | 2 | 41 |
| 1 | 1 | 1 | 1 | 1 | 1 | 21 |
| 3 | 3 | 3 | 3 | 3 | 3 | 63 |
| 1 | 1 | 1 | 1 | 1 | 1 | 23 |
| 1 | 1 | 1 | 2 | 2 | 1 | 23 |
| 1 | 1 | 1 | 1 | 1 | 1 | 28 |
| 1 | 1 | 1 | 2 | 1 | 1 | 31 |
| 1 | 1 | 1 | 2 | 1 | 1 | 30 |
| 2 | 1 | 1 | 1 | 2 | 1 | 42 |
| 1 | 1 | 2 | 1 | 2 | 1 | 34 |
| 2 | 1 | 3 | 1 | 1 | 1 | 38 |
| 2 | 2 | 3 | 3 | 3 | 1 | 54 |
| 1 | 1 | 1 | 1 | 1 | 1 | 26 |
| 1 | 1 | 1 | 1 | 1 | 1 | 23 |
| 1 | 1 | 1 | 1 | 1 | 1 | 21 |
| 1 | 1 | 1 | 1 | 1 | 1 | 25 |

|   |   |   |   |   |   |    |
|---|---|---|---|---|---|----|
| 1 | 1 | 1 | 1 | 1 | 1 | 27 |
| 2 | 3 | 2 | 2 | 3 | 2 | 48 |
| 2 | 1 | 1 | 1 | 1 | 1 | 30 |
| 1 | 1 | 1 | 1 | 1 | 1 | 21 |
| 1 | 1 | 1 | 1 | 1 | 1 | 35 |
| 1 | 1 | 1 | 1 | 2 | 1 | 31 |
| 1 | 1 | 1 | 1 | 1 | 1 | 21 |
| 2 | 2 | 3 | 2 | 3 | 1 | 60 |
| 1 | 1 | 2 | 2 | 1 | 1 | 29 |
| 1 | 1 | 3 | 1 | 1 | 1 | 33 |
| 1 | 1 | 3 | 1 | 1 | 1 | 33 |
| 1 | 1 | 1 | 2 | 4 | 1 | 49 |
| 3 | 2 | 3 | 3 | 3 | 3 | 53 |
| 1 | 1 | 1 | 1 | 1 | 1 | 28 |
| 1 | 1 | 1 | 1 | 1 | 1 | 30 |
| 1 | 1 | 1 | 1 | 1 | 1 | 22 |
| 1 | 1 | 1 | 1 | 1 | 1 | 24 |
| 1 | 1 | 2 | 2 | 1 | 1 | 25 |
| 1 | 1 | 1 | 2 | 3 | 2 | 42 |
| 1 | 1 | 2 | 1 | 1 | 1 | 34 |
| 2 | 1 | 1 | 1 | 1 | 1 | 27 |
| 1 | 1 | 2 | 2 | 2 | 1 | 39 |
| 1 | 1 | 1 | 1 | 1 | 1 | 21 |
| 1 | 1 | 1 | 1 | 1 | 1 | 21 |
| 1 | 1 | 1 | 2 | 1 | 1 | 29 |
| 1 | 1 | 1 | 1 | 1 | 1 | 29 |
| 1 | 1 | 1 | 1 | 1 | 1 | 21 |
| 1 | 1 | 1 | 1 | 1 | 1 | 30 |
| 1 | 1 | 1 | 1 | 1 | 1 | 23 |
| 1 | 1 | 1 | 1 | 1 | 1 | 25 |
| 1 | 1 | 2 | 1 | 1 | 1 | 31 |
| 1 | 1 | 1 | 1 | 2 | 1 | 27 |
| 2 | 1 | 1 | 1 | 1 | 1 | 41 |
| 1 | 1 | 1 | 1 | 1 | 1 | 23 |
| 1 | 1 | 3 | 1 | 2 | 1 | 31 |
| 1 | 1 | 1 | 1 | 1 | 1 | 23 |
| 2 | 1 | 2 | 1 | 1 | 2 | 36 |
| 1 | 1 | 3 | 1 | 1 | 1 | 34 |
| 4 | 4 | 1 | 4 | 4 | 4 | 66 |
| 1 | 1 | 1 | 1 | 1 | 1 | 24 |
| 1 | 1 | 1 | 1 | 1 | 1 | 22 |
| 1 | 1 | 2 | 2 | 2 | 1 | 43 |
| 1 | 1 | 1 | 1 | 1 | 1 | 21 |
| 1 | 1 | 1 | 1 | 1 | 1 | 22 |
| 1 | 1 | 2 | 1 | 3 | 1 | 38 |
| 2 | 1 | 2 | 1 | 1 | 1 | 35 |
| 1 | 3 | 3 | 2 | 1 | 1 | 43 |
| 2 | 1 | 1 | 1 | 1 | 1 | 30 |
| 1 | 1 | 1 | 1 | 1 | 1 | 22 |
| 1 | 1 | 2 | 1 | 1 | 1 | 31 |
| 1 | 1 | 2 | 1 | 1 | 1 | 26 |
| 1 | 1 | 1 | 1 | 1 | 1 | 23 |
| 1 | 1 | 3 | 2 | 1 | 1 | 47 |
| 1 | 1 | 1 | 1 | 1 | 1 | 28 |

|   |   |   |   |   |   |    |
|---|---|---|---|---|---|----|
| 1 | 3 | 3 | 1 | 2 | 3 | 51 |
| 1 | 1 | 1 | 2 | 2 | 2 | 41 |
| 1 | 1 | 1 | 1 | 1 | 1 | 25 |
| 1 | 1 | 2 | 1 | 1 | 1 | 33 |
| 1 | 1 | 4 | 2 | 2 | 1 | 38 |
| 2 | 3 | 3 | 1 | 2 | 2 | 55 |
| 1 | 2 | 2 | 1 | 1 | 2 | 36 |
| 1 | 1 | 1 | 1 | 1 | 1 | 28 |
| 2 | 1 | 3 | 1 | 1 | 1 | 37 |
| 1 | 2 | 2 | 2 | 2 | 2 | 46 |
| 1 | 1 | 2 | 1 | 1 | 1 | 29 |
| 1 | 1 | 2 | 1 | 1 | 1 | 30 |
| 2 | 1 | 2 | 1 | 1 | 1 | 43 |
| 1 | 1 | 2 | 1 | 1 | 1 | 24 |
| 1 | 1 | 2 | 1 | 1 | 1 | 24 |
| 1 | 1 | 1 | 1 | 1 | 1 | 25 |
| 1 | 1 | 2 | 2 | 1 | 1 | 36 |
| 1 | 1 | 1 | 1 | 1 | 1 | 22 |
| 1 | 1 | 1 | 1 | 1 | 1 | 22 |
| 1 | 1 | 1 | 1 | 1 | 1 | 22 |
| 2 | 1 | 3 | 3 | 4 | 2 | 54 |
| 2 | 1 | 4 | 2 | 2 | 1 | 39 |
| 1 | 1 | 1 | 1 | 1 | 1 | 21 |
| 1 | 1 | 1 | 2 | 1 | 1 | 34 |
| 1 | 1 | 1 | 1 | 1 | 1 | 22 |
| 1 | 1 | 2 | 1 | 1 | 1 | 27 |
| 2 | 1 | 2 | 2 | 2 | 1 | 40 |
| 1 | 1 | 1 | 1 | 1 | 1 | 26 |
| 2 | 2 | 2 | 2 | 2 | 2 | 42 |
| 1 | 1 | 1 | 1 | 1 | 1 | 23 |
| 2 | 2 | 2 | 2 | 2 | 2 | 22 |
| 3 | 1 | 2 | 1 | 2 | 1 | 42 |
| 1 | 1 | 2 | 1 | 1 | 1 | 39 |
| 1 | 1 | 2 | 1 | 1 | 1 | 28 |
| 1 | 2 | 2 | 1 | 1 | 1 | 25 |
| 2 | 1 | 2 | 2 | 2 | 1 | 33 |
| 1 | 1 | 1 | 1 | 1 | 1 | 40 |
| 1 | 1 | 1 | 1 | 1 | 1 | 24 |
| 1 | 1 | 3 | 1 | 1 | 1 | 21 |
| 2 | 1 | 1 | 1 | 1 | 1 | 32 |
| 1 | 1 | 1 | 1 | 2 | 1 | 28 |
| 1 | 1 | 1 | 1 | 1 | 1 | 28 |
| 3 | 1 | 2 | 3 | 2 | 1 | 21 |
| 1 | 1 | 1 | 1 | 1 | 1 | 51 |
| 1 | 1 | 1 | 1 | 1 | 1 | 23 |
| 1 | 1 | 1 | 1 | 1 | 1 | 24 |
| 1 | 1 | 1 | 1 | 1 | 1 | 26 |
| 1 | 1 | 3 | 1 | 1 | 1 | 21 |
| 1 | 1 | 1 | 1 | 1 | 1 | 30 |
| 1 | 1 | 1 | 1 | 1 | 1 | 23 |
| 1 | 1 | 2 | 1 | 1 | 2 | 28 |
| 1 | 2 | 2 | 2 | 2 | 2 | 36 |
| 1 | 1 | 2 | 1 | 1 | 1 | 45 |
| 1 | 1 | 3 | 2 | 1 | 1 | 28 |

|   |   |   |   |   |   |    |
|---|---|---|---|---|---|----|
| 2 | 2 | 2 | 2 | 2 | 2 | 35 |
| 1 | 1 | 1 | 1 | 1 | 1 | 42 |
| 1 | 1 | 1 | 1 | 1 | 1 | 30 |
| 2 | 1 | 1 | 1 | 1 | 1 | 27 |
| 1 | 1 | 1 | 1 | 1 | 1 | 59 |
| 1 | 1 | 3 | 2 | 1 | 1 | 21 |

re
